# Supplementary material for: Key Pathways and Genes of Arabidopsis thaliana and Arabidopsis halleri Roots under Cadmium Stress Responses: Differences and Similarities
Source: MDPI journal article supplement (doi:10.3390/plants12091793), 2023-04-27
Supplement: s1 [file s1]

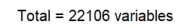

*Dashed horizontal line for significance threshold, vertical dashed lines for log<sub>2</sub> fold change (FC) threshold.*

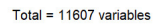

dots). Dashed horizontal line for significance threshold, vertical dashed lines for  $\log_2$  fold change (FC) threshold.
