# Supplementary material for: Key Pathways and Genes of Arabidopsis thaliana and Arabidopsis halleri Roots under Cadmium Stress Responses: Differences and Similarities
Source: Plants (Basel). 2023 Apr 27;12(9):1793. doi: 10.3390/plants12091793 (PMC10180823; doi:10.3390/plants12091793)
Supplement: Supplementary file 1 [file plants-12-01793-s001.zip]

Archive with 6 entries (6 files):
- Supplementary figures.pdf
- Supplementary file S1.xlsx
- Supplementary file S2.xlsx
- Supplementary file S3.xlsx
- Supplementary file S4.xlsx
- Supplementary file S5.xlsx
