# Supplementary material for: Key Pathways and Genes of Arabidopsis thaliana and Arabidopsis halleri Roots under Cadmium Stress Responses: Differences and Similarities
Source: Plants (Basel). 2023 Apr 27;12(9):1793. doi: 10.3390/plants12091793 (PMC10180823; doi:10.3390/plants12091793)
Supplement: Supplementary file 1 [file plants-12-01793-s001.zip › Supplementary file S1.xlsx]

## Sheet: brown
File S1a: functional enrichment of the genes from the brown module of A. halleri
source	term_name	term_id	adjusted_p_value	negative_log10_of_adjusted_p_value	term_size	query_size	intersection_size	effective_domain_size	intersections
GO:MF	catalytic activity	GO:0003824	5.046e-07	6.29705	9873	4285	2159	21313	AT1G73875,AT1G38131,AT1G38065,AT3G12690,AT2G45220,AT3G11270,AT2G04450,AT2G04440,AT1G52630,AT3G04080,AT5G66390,AT4G28940,AT1G68470,AT3G15350,AT4G16220,AT1G09160,AT1G15710,AT5G16190,AT3G54150,AT4G35600,AT2G05620,AT5G42100,AT1G64400,AT4G23100,AT4G19810,AT4G1
GO:MF	structural constituent of ribosome	GO:0003735	2.1872e-05	4.66011	423	4285	131	21313	AT2G19730,AT3G12370,AT5G27850,AT2G47570,AT5G23900,AT5G47700,AT4G16720,AT1G26880,AT5G15200,AT1G57650,AT5G02870,AT2G41840,AT4G27090,AT5G35530,AT3G53870,AT3G62250,AT4G13170,AT4G31700,AT3G44590,AT1G05190,AT1G72370,AT5G17870,AT1G48350,AT1G31817,AT4G15000,AT2G3
GO:MF	protein kinase activity	GO:0004672	5.37055e-05	4.26998	1139	4285	299	21313	AT3G12690,AT4G35600,AT3G04910,Q9C6G4,AT4G02630,AT5G58300,AT1G56120,AT1G66830,AT1G73670,AT1G68330,AT5G07070,AT1G48260,AT1G52290,AT2G34180,AT5G48380,AT5G49780,AT5G20050,AT2G18890,AT4G35230,AT3G54710,AT5G18610,AT3G20530,AT1G14390,AT1G60940,AT5G55830,AT5G4212
GO:MF	protein serine kinase activity	GO:0106310	0.000102827	3.98789	673	4285	189	21313	AT3G12690,AT4G35600,AT3G04910,Q9C6G4,AT1G56120,AT1G73670,AT5G07070,AT1G48260,AT1G52290,AT2G34180,AT5G20050,AT4G35230,AT5G18610,AT3G20530,AT1G14390,AT1G60940,AT5G55830,AT5G42120,AT1G08720,AT5G61560,AT1G74360,AT2G26700,AT1G80640,AT2G20635,AT5G02070,AT5G0280
GO:MF	protein threonine kinase activity	GO:0106311	0.000102827	3.98789	673	4285	189	21313	AT3G12690,AT4G35600,AT3G04910,Q9C6G4,AT1G56120,AT1G73670,AT5G07070,AT1G48260,AT1G52290,AT2G34180,AT5G20050,AT4G35230,AT5G18610,AT3G20530,AT1G14390,AT1G60940,AT5G55830,AT5G42120,AT1G08720,AT5G61560,AT1G74360,AT2G26700,AT1G80640,AT2G20635,AT5G02070,AT5G0280
GO:MF	phosphotransferase activity, alcohol group as acceptor	GO:0016773	0.000122733	3.91104	1303	4285	334	21313	AT3G12690,AT4G35600,AT3G04910,Q9C6G4,AT4G02630,AT5G43780,AT5G58300,AT1G56120,AT1G66830,AT1G73670,AT1G68330,AT4G39940,AT5G07070,AT1G48260,AT1G52290,AT2G18730,AT1G17160,AT2G34180,AT5G48380,AT5G49780,AT5G03300,AT5G20050,AT2G18890,AT3G61080,AT4G35230,AT3G5471
GO:MF	transferase activity	GO:0016740	0.000464468	3.33304	4283	4285	973	21313	AT1G38131,AT1G38065,AT3G12690,AT1G52630,AT1G68470,AT3G15350,AT5G16190,AT3G54150,AT4G35600,AT3G04910,AT3G19540,AT4G22570,AT4G15280,AT5G64660,Q9C6G4,AT4G02630,AT5G43780,AT5G58300,AT1G56120,AT1G73600,AT2G20690,AT5G67250,AT1G66830,AT4G23590,AT2G31510,AT3G5756
GO:MF	protein serine/threonine kinase activity	GO:0004674	0.000589729	3.22935	896	4285	237	21313	AT3G12690,AT4G35600,AT3G04910,Q9C6G4,AT4G02630,AT1G56120,AT1G73670,AT1G68330,AT5G07070,AT1G48260,AT1G52290,AT2G34180,AT5G49780,AT5G20050,AT2G18890,AT4G35230,AT3G54710,AT5G18610,AT3G20530,AT1G14390,AT1G60940,AT5G55830,AT5G42120,AT1G08720,AT5G61560,AT3G6222
GO:MF	kinase activity	GO:0016301	0.0012432	2.90546	1514	4285	374	21313	AT3G12690,AT4G35600,AT3G04910,Q9C6G4,AT4G02630,AT5G43780,AT5G58300,AT1G56120,AT1G66830,AT3G57560,AT1G73670,AT1G68330,AT4G39940,AT5G07070,AT1G48260,AT1G52290,AT2G18730,AT1G17160,AT1G10700,AT2G34180,AT5G48380,AT5G49780,AT5G03300,AT5G20050,AT2G18890,AT3G6108
GO:MF	microtubule binding	GO:0008017	0.00171303	2.76623	169	4285	59	21313	AT3G60660,AT4G32330,AT5G66310,AT1G31810,AT1G27920,AT2G21300,AT1G23790,AT3G49650,AT2G44190,AT2G28620,AT3G23090,AT3G60190,AT2G44590,AT5G17410,AT3G60840,AT1G50710,AT3G10180,AT5G02370,AT2G14120,AT3G19720,AT3G47690,AT3G44050,AT5G62580,AT1G18370,AT4G26760,AT4G1
GO:MF	catalytic activity, acting on a protein	GO:0140096	0.00289617	2.53818	2866	4285	664	21313	AT3G12690,AT3G11270,AT1G09160,AT4G35600,AT3G04910,AT5G64660,Q9C6G4,AT4G02630,AT5G58300,AT4G14570,AT1G56120,AT2G45500,AT5G67250,AT1G66830,AT2G31510,AT4G36550,AT1G73670,AT1G68330,AT5G07070,AT1G48260,AT1G53190,AT1G52290,AT4G26080,AT2G34180,AT5G48380,AT5G2265
GO:MF	tubulin binding	GO:0015631	0.00365078	2.43761	184	4285	62	21313	AT3G60660,AT4G32330,AT5G66310,AT1G31810,AT1G27920,AT2G21300,AT1G23790,AT3G49650,AT2G44190,AT2G28620,AT3G23090,AT3G60190,AT2G44590,AT5G17410,AT3G60840,AT1G50710,AT3G10180,AT5G02370,AT4G33470,AT2G14120,AT3G19720,AT3G47690,AT3G44050,AT5G62580,AT4G39920,AT4G2
GO:MF	structural molecule activity	GO:0005198	0.00545997	2.26281	545	4285	150	21313	AT3G60830,AT2G19730,AT3G12370,AT5G27850,AT2G47570,AT5G23900,AT5G47700,AT4G16720,AT1G26880,AT5G15200,AT1G57650,AT5G02870,AT2G41840,AT4G27090,AT1G49490,AT5G35530,AT3G53870,AT3G62250,AT4G13170,AT4G31700,AT3G44590,AT1G05190,AT1G72370,AT5G17870,AT1G48350,AT5G1
GO:MF	hydrolase activity, hydrolyzing O-glycosyl compounds	GO:0004553	0.0378482	1.42195	415	4285	115	21313	AT5G42100,AT4G19810,AT4G19770,AT1G10640,AT1G30080,AT5G11720,AT2G44490,AT1G70710,AT1G23210,AT5G11920,AT2G36390,AT1G45191,AT1G76130,AT4G39010,AT4G38990,AT4G38650,AT4G38300,AT1G19940,AT2G01850,AT4G19800,AT4G32380,AT4G27830,AT3G01120,AT1G11545,AT1G67830,AT1G2
GO:BP	metabolic process	GO:0008152	1.03227e-16	15.9862	12793	4534	2771	23191	AT1G73875,AT1G38131,AT1G38065,AT3G12690,AT2G28510,AT2G45220,AT3G11270,AT1G52630,AT5G04920,AT3G04080,AT5G06000,AT3G11400,AT2G28230,AT2G28020,AT5G66390,AT4G28940,AT1G68470,AT2G19730,AT2G38470,AT4G16220,AT2G27730,AT1G09160,AT1G15710,AT5G16190,AT3G54150,AT4G3
GO:BP	organic substance metabolic process	GO:0071704	9.62053e-15	14.0168	11833	4534	2570	23191	AT1G73875,AT1G38131,AT1G38065,AT3G12690,AT2G28510,AT2G45220,AT3G11270,AT1G52630,AT5G04920,AT3G04080,AT5G06000,AT3G11400,AT2G28230,AT2G28020,AT5G66390,AT4G28940,AT1G68470,AT2G19730,AT2G38470,AT4G16220,AT1G09160,AT1G15710,AT4G35600,AT5G42100,AT1G64400,AT3G1
GO:BP	response to stimulus	GO:0050896	2.34115e-12	11.6306	6465	4534	1479	23191	AT4G24180,AT2G45220,AT2G04450,AT2G04440,AT5G40780,AT2G28230,AT5G66390,AT2G38470,AT5G22530,AT4G12480,AT4G16440,AT1G29395,AT3G54150,AT2G05620,AT5G42100,AT4G33710,AT4G23100,AT4G19810,AT4G13950,AT3G04910,AT2G30490,AT3G16470,AT5G37720,AT1G29690,AT5G06760,AT2G1
GO:BP	response to abiotic stimulus	GO:0009628	7.77633e-12	11.1092	2214	4534	574	23191	AT5G40780,AT2G38470,AT4G12480,AT4G16440,AT1G29395,AT2G05620,AT4G23100,AT4G19810,AT2G30490,AT3G16470,AT5G06760,AT5G14920,AT5G66570,AT5G08740,AT4G00430,AT5G47120,AT2G47180,AT2G44490,AT4G26080,AT2G45260,AT5G47550,AT5G20150,AT4G32890,AT1G44170,AT2G36390,AT4G1
GO:BP	cellular metabolic process	GO:0044237	1.93628e-11	10.713	11418	4534	2461	23191	AT1G73875,AT3G12690,AT2G28510,AT3G11270,AT5G04920,AT3G04080,AT5G06000,AT3G11400,AT2G28230,AT2G28020,AT5G66390,AT4G28940,AT1G68470,AT2G19730,AT2G38470,AT2G27730,AT1G09160,AT1G15710,AT4G35600,AT2G05620,AT1G64400,AT3G12370,AT4G23100,AT5G27850,AT2G47570,AT3G0
GO:BP	organonitrogen compound metabolic process	GO:1901564	5.66099e-11	10.2471	5994	4534	1371	23191	AT3G12690,AT3G11270,AT5G04920,AT5G06000,AT3G11400,AT4G28940,AT1G68470,AT2G19730,AT2G38470,AT1G09160,AT1G15710,AT4G35600,AT3G12370,AT4G23100,AT5G27850,AT2G47570,AT4G19810,AT4G19770,AT3G04910,AT5G23900,AT4G22570,AT5G47700,AT4G16720,AT5G64660,AT1G26880,Q9C6G
GO:BP	primary metabolic process	GO:0044238	1.0893e-10	9.96285	11177	4534	2407	23191	AT1G73875,AT1G38131,AT1G38065,AT3G12690,AT2G28510,AT2G45220,AT3G11270,AT1G52630,AT5G04920,AT3G04080,AT5G06000,AT3G11400,AT2G28230,AT2G28020,AT4G28940,AT1G68470,AT2G19730,AT2G38470,AT4G16220,AT1G09160,AT1G15710,AT4G35600,AT5G42100,AT1G64400,AT3G12370,AT5G2
GO:BP	response to chemical	GO:0042221	1.72516e-10	9.76317	3153	4534	771	23191	AT4G24180,AT2G04450,AT2G28230,AT5G66390,AT2G38470,AT5G22530,AT4G12480,AT1G29395,AT2G05620,AT4G23100,AT4G19810,AT3G16470,AT5G06760,AT2G17040,AT5G64660,AT5G14920,AT2G21250,AT5G65310,AT1G75270,AT1G74100,AT4G00430,AT1G30755,AT5G47120,AT2G47180,AT2G13810,AT4G2
GO:BP	response to oxygen-containing compound	GO:1901700	6.89666e-07	6.16136	1691	4534	429	23191	AT2G04450,AT2G28230,AT2G38470,AT4G12480,AT1G29395,AT2G05620,AT4G23100,AT4G19810,AT3G16470,AT5G06760,AT2G17040,AT5G64660,AT5G14920,AT5G65310,AT1G75270,AT1G74100,AT4G00430,AT1G30755,AT5G47120,AT2G47180,AT2G13810,AT4G26080,AT1G44170,AT2G36390,AT5G04760,AT4G1
GO:BP	phosphorus metabolic process	GO:0006793	7.55592e-07	6.12171	2514	4534	608	23191	AT3G12690,AT3G04080,AT1G09160,AT4G35600,AT3G04910,AT4G22570,AT5G47700,Q9C6G4,AT4G02630,AT5G43780,AT5G58300,AT1G56120,AT1G73600,AT1G66830,AT1G07230,AT1G12780,AT3G57560,AT5G66570,AT1G80860,AT1G73670,AT5G40610,AT1G68330,AT4G39940,AT2G33255,AT5G57440,AT1G6243
GO:BP	phosphate-containing compound metabolic process	GO:0006796	1.7911e-06	5.74688	2471	4534	596	23191	AT3G12690,AT3G04080,AT1G09160,AT4G35600,AT3G04910,AT4G22570,AT5G47700,Q9C6G4,AT4G02630,AT5G43780,AT5G58300,AT1G56120,AT1G73600,AT1G66830,AT1G07230,AT3G57560,AT5G66570,AT1G80860,AT1G73670,AT5G40610,AT1G68330,AT4G39940,AT2G33255,AT5G57440,AT1G62430,AT5G0707
GO:BP	protein phosphorylation	GO:0006468	1.94773e-06	5.71047	1277	4534	334	23191	AT3G12690,AT4G35600,AT3G04910,AT5G47700,Q9C6G4,AT4G02630,AT5G58300,AT1G56120,AT1G66830,AT1G73670,AT1G68330,AT5G07070,AT1G48260,AT1G52290,AT2G34180,AT5G48380,AT5G49780,AT5G20050,AT2G18890,AT4G35230,AT1G70210,AT5G18610,AT3G20530,AT1G14390,AT1G60940,AT5G5583
GO:BP	response to stress	GO:0006950	2.07287e-06	5.68343	3906	4534	899	23191	AT4G24180,AT2G45220,AT5G40780,AT2G28230,AT5G66390,AT2G38470,AT5G22530,AT4G12480,AT1G29395,AT3G54150,AT2G05620,AT5G42100,AT4G33710,AT4G23100,AT4G19810,AT3G16470,AT5G37720,AT1G29690,AT5G06760,AT1G18250,AT1G57650,AT2G02100,AT2G02140,AT4G38660,AT5G14920,AT5G6
GO:BP	response to organic substance	GO:0010033	3.30122e-06	5.48133	2063	4534	506	23191	AT4G24180,AT2G04450,AT2G28230,AT2G38470,AT4G12480,AT1G29395,AT4G23100,AT4G19810,AT3G16470,AT2G17040,AT5G64660,AT5G14920,AT5G65310,AT1G75270,AT1G74100,AT1G30755,AT2G47180,AT2G13810,AT4G26080,AT1G09210,AT1G44170,AT2G36390,AT3G51800,AT4G16420,AT5G04760,AT4G1
GO:BP	cellular protein metabolic process	GO:0044267	3.30592e-06	5.48071	4362	4534	992	23191	AT3G12690,AT3G11270,AT5G04920,AT5G06000,AT3G11400,AT1G68470,AT2G19730,AT1G09160,AT4G35600,AT3G12370,AT5G27850,AT2G47570,AT3G04910,AT5G23900,AT5G47700,AT4G16720,AT5G64660,AT1G26880,Q9C6G4,AT5G15200,AT4G02630,AT1G57650,AT5G58300,AT1G56120,AT5G02870,AT5G6725
GO:BP	nitrogen compound metabolic process	GO:0006807	5.45659e-06	5.26308	9809	4534	2089	23191	AT1G73875,AT3G12690,AT2G28510,AT3G11270,AT5G04920,AT3G04080,AT5G06000,AT3G11400,AT2G28230,AT2G28020,AT4G28940,AT1G68470,AT2G19730,AT2G38470,AT1G09160,AT1G15710,AT4G35600,AT3G12370,AT4G23100,AT5G27850,AT2G47570,AT4G19810,AT4G19770,AT3G04910,AT5G05090,AT5G2
GO:BP	cellular process	GO:0009987	6.32385e-06	5.19902	15804	4534	3249	23191	AT1G73875,AT3G12690,AT2G28510,AT2G45220,AT3G11270,AT2G04450,AT2G04440,AT5G40780,AT5G04920,AT3G04080,AT5G06000,AT3G11400,AT2G28230,AT2G28020,AT5G66390,AT3G60830,AT4G28940,AT1G68470,AT2G19730,AT2G38470,AT4G17890,AT2G27730,AT1G09160,AT1G15710,AT1G29395,AT5G1
GO:BP	protein metabolic process	GO:0019538	8.80393e-06	5.05532	4808	4534	1080	23191	AT3G12690,AT3G11270,AT5G04920,AT5G06000,AT3G11400,AT1G68470,AT2G19730,AT1G09160,AT4G35600,AT3G12370,AT5G27850,AT2G47570,AT3G04910,AT5G23900,AT5G47700,AT4G16720,AT5G64660,AT1G26880,Q9C6G4,AT5G15200,AT4G02630,AT1G57650,AT5G58300,AT4G14570,AT1G56120,AT5G0287
GO:BP	cellular macromolecule metabolic process	GO:0044260	1.99209e-05	4.70069	7636	4534	1650	23191	AT3G12690,AT2G28510,AT3G11270,AT5G04920,AT5G06000,AT3G11400,AT2G28230,AT2G28020,AT1G68470,AT2G19730,AT2G38470,AT1G09160,AT4G35600,AT3G12370,AT5G27850,AT2G47570,AT3G04910,AT5G05090,AT5G23900,AT5G47700,AT2G17040,AT4G16720,AT5G64660,AT1G26880,Q9C6G4,AT5G1520
GO:BP	small molecule metabolic process	GO:0044281	3.32517e-05	4.47819	1833	4534	449	23191	AT1G38131,AT1G38065,AT1G52630,AT3G04080,AT4G28940,AT1G15710,AT1G64400,AT4G23100,AT2G30490,AT1G29690,AT4G22570,AT2G20690,AT4G23590,AT1G12780,AT3G57560,AT5G56720,AT5G08740,AT4G39940,AT1G74100,AT5G57440,AT1G79500,AT1G16340,AT5G47120,AT1G48320,AT2G47180,AT2G4
GO:BP	protein modification process	GO:0036211	4.78789e-05	4.31986	3200	4534	739	23191	AT3G12690,AT1G68470,AT1G09160,AT4G35600,AT3G04910,AT5G47700,AT5G64660,Q9C6G4,AT4G02630,AT5G58300,AT1G56120,AT5G67250,AT1G73177,AT1G66830,AT2G31510,AT5G66570,AT4G36550,AT4G30510,AT1G73670,AT1G68330,AT1G75270,AT5G07070,AT1G48260,AT1G53190,AT2G38195,AT1G5229
GO:BP	cellular protein modification process	GO:0006464	4.78789e-05	4.31986	3200	4534	739	23191	AT3G12690,AT1G68470,AT1G09160,AT4G35600,AT3G04910,AT5G47700,AT5G64660,Q9C6G4,AT4G02630,AT5G58300,AT1G56120,AT5G67250,AT1G73177,AT1G66830,AT2G31510,AT5G66570,AT4G36550,AT4G30510,AT1G73670,AT1G68330,AT1G75270,AT5G07070,AT1G48260,AT1G53190,AT2G38195,AT1G5229
GO:BP	phosphorylation	GO:0016310	5.7422e-05	4.24092	1689	4534	416	23191	AT3G12690,AT4G35600,AT3G04910,AT5G47700,Q9C6G4,AT4G02630,AT5G43780,AT5G58300,AT1G56120,AT1G66830,AT3G57560,AT1G73670,AT1G68330,AT4G39940,AT5G07070,AT1G48260,AT1G52290,AT2G18730,AT1G17160,AT1G10700,AT2G34180,AT5G48380,AT5G49780,AT2G01140,AT5G03300,AT5G2005
GO:BP	biosynthetic process	GO:0009058	0.000155401	3.80855	5838	4534	1277	23191	AT2G28510,AT3G04080,AT5G06000,AT3G11400,AT2G28230,AT2G28020,AT5G66390,AT1G68470,AT2G19730,AT2G38470,AT1G15710,AT3G12370,AT4G23100,AT5G27850,AT2G47570,AT2G30490,AT5G05090,AT5G23900,AT4G22570,AT5G47700,AT2G17040,AT4G16720,AT1G26880,AT5G15200,AT1G57650,AT5G4
GO:BP	organonitrogen compound biosynthetic process	GO:1901566	0.00026551	3.57592	1808	4534	437	23191	AT5G06000,AT3G11400,AT1G68470,AT2G19730,AT2G38470,AT1G15710,AT3G12370,AT4G23100,AT5G27850,AT2G47570,AT5G23900,AT4G22570,AT5G47700,AT4G16720,AT1G26880,AT5G15200,AT1G57650,AT1G73600,AT2G20690,AT5G02870,AT3G57560,AT1G80860,AT4G30510,AT2G41840,AT4G39940,AT1G7
GO:BP	macromolecule metabolic process	GO:0043170	0.000325469	3.48749	9198	4534	1946	23191	AT1G73875,AT3G12690,AT2G28510,AT2G45220,AT3G11270,AT5G04920,AT5G06000,AT3G11400,AT2G28230,AT2G28020,AT1G68470,AT2G19730,AT2G38470,AT1G09160,AT4G35600,AT3G12370,AT5G27850,AT2G47570,AT4G19810,AT4G19770,AT3G04910,AT5G05090,AT5G23900,AT5G47700,AT2G17040,AT4G1
GO:BP	organic acid biosynthetic process	GO:0016053	0.000344542	3.46276	577	4534	162	23191	AT1G15710,AT3G57560,AT4G39940,AT2G13810,AT3G25900,AT1G06080,AT5G04760,AT1G50090,AT3G54010,AT2G30200,AT5G64370,AT1G64670,AT5G02890,AT2G20610,AT3G02870,AT5G22070,AT4G22680,AT2G43100,AT4G32980,AT1G13930,AT5G27200,AT2G45790,AT3G58990,AT5G14200,AT1G31180,AT3G0
GO:BP	response to lipid	GO:0033993	0.000373703	3.42747	966	4534	251	23191	AT4G12480,AT1G29395,AT4G23100,AT4G19810,AT3G16470,AT5G14920,AT5G65310,AT1G74100,AT2G47180,AT4G26080,AT1G44170,AT5G04760,AT2G26710,AT1G80710,AT4G32570,AT3G61890,AT4G35230,AT5G17490,AT5G46790,AT5G52900,AT5G49620,AT3G01530,AT5G03470,AT1G64670,AT4G27410,AT1G0
GO:BP	cellular response to stimulus	GO:0051716	0.000396729	3.40151	3313	4534	754	23191	AT2G04450,AT2G04440,AT2G28230,AT5G66390,AT2G38470,AT1G29395,AT2G05620,AT4G23100,AT4G13950,AT3G04910,AT1G29690,AT3G27473,AT1G57650,AT5G14920,AT5G65310,AT1G73670,AT5G08740,AT1G75270,AT5G47120,AT5G07070,AT1G48260,AT5G45970,AT2G44490,AT4G24290,AT3G52630,AT4G1
GO:BP	cell cycle	GO:0007049	0.000399791	3.39817	690	4534	188	23191	AT1G73177,AT2G38195,AT3G60660,AT4G05360,AT3G51800,AT1G80710,AT3G10730,AT3G22880,AT1G70210,AT2G20960,AT5G03470,AT3G54710,AT5G12250,AT2G38185,AT1G14350,AT2G02820,AT1G75780,AT4G35620,AT1G06660,AT1G61000,AT3G57860,AT1G07270,AT1G50490,AT2G20635,AT3G11520,AT5G0
GO:BP	organic acid metabolic process	GO:0006082	0.000429778	3.36676	1228	4534	309	23191	AT1G15710,AT1G64400,AT4G23100,AT1G29690,AT4G23590,AT3G57560,AT5G56720,AT4G39940,AT1G74100,AT5G47120,AT2G44490,AT1G69870,AT2G13810,AT3G25900,AT1G06080,AT1G01710,AT5G04760,AT1G50090,AT5G54080,AT2G01140,AT1G12630,AT3G28920,AT2G02390,AT4G37150,AT3G54010,AT2G3
GO:BP	carboxylic acid biosynthetic process	GO:0046394	0.000508054	3.29409	542	4534	153	23191	AT1G15710,AT3G57560,AT4G39940,AT2G13810,AT3G25900,AT1G06080,AT5G04760,AT1G50090,AT3G54010,AT2G30200,AT5G64370,AT1G64670,AT5G02890,AT2G20610,AT3G02870,AT5G22070,AT4G22680,AT2G43100,AT1G13930,AT5G27200,AT2G45790,AT3G58990,AT5G14200,AT1G31180,AT3G01120,AT1G3
GO:BP	cell wall organization or biogenesis	GO:0071554	0.000529824	3.27587	697	4534	189	23191	AT2G45220,AT5G16190,AT5G42100,AT4G23100,AT2G41800,AT1G12780,AT2G35650,AT1G79500,AT1G16340,AT2G28950,AT2G21140,AT2G44490,AT1G70710,AT1G23210,AT1G02810,AT1G49490,AT2G39700,AT1G71690,AT1G27930,AT3G47380,AT5G60490,AT4G39010,AT4G38990,AT5G62360,AT1G01200,AT1G6
GO:BP	response to endogenous stimulus	GO:0009719	0.000716149	3.145	1624	4534	394	23191	AT4G24180,AT4G12480,AT1G29395,AT4G23100,AT4G19810,AT3G16470,AT5G14920,AT5G65310,AT1G74100,AT1G30755,AT2G47180,AT4G26080,AT1G44170,AT3G51800,AT4G16420,AT5G04760,AT2G26710,AT1G80710,AT4G32570,AT1G12630,AT2G28550,AT4G32330,AT3G22810,AT3G59940,AT4G34760,AT2G1
GO:BP	oxoacid metabolic process	GO:0043436	0.000930405	3.03133	1179	4534	296	23191	AT1G15710,AT1G64400,AT4G23100,AT1G29690,AT4G23590,AT3G57560,AT5G56720,AT4G39940,AT1G74100,AT5G47120,AT2G44490,AT1G69870,AT2G13810,AT3G25900,AT1G06080,AT1G01710,AT5G04760,AT1G50090,AT5G54080,AT2G01140,AT1G12630,AT3G28920,AT2G02390,AT4G37150,AT3G54010,AT2G3
GO:BP	response to hormone	GO:0009725	0.00106624	2.97215	1593	4534	386	23191	AT4G24180,AT4G12480,AT1G29395,AT4G23100,AT4G19810,AT3G16470,AT5G14920,AT5G65310,AT1G74100,AT1G30755,AT2G47180,AT4G26080,AT1G44170,AT3G51800,AT4G16420,AT5G04760,AT2G26710,AT1G80710,AT4G32570,AT1G12630,AT2G28550,AT4G32330,AT3G22810,AT3G59940,AT4G34760,AT2G1
GO:BP	organic substance biosynthetic process	GO:1901576	0.00119173	2.92382	5698	4534	1238	23191	AT2G28510,AT3G04080,AT5G06000,AT3G11400,AT2G28230,AT2G28020,AT5G66390,AT1G68470,AT2G19730,AT2G38470,AT1G15710,AT3G12370,AT4G23100,AT5G27850,AT2G47570,AT2G30490,AT5G05090,AT5G23900,AT4G22570,AT5G47700,AT2G17040,AT4G16720,AT1G26880,AT5G15200,AT1G57650,AT5G5
GO:BP	cellular response to chemical stimulus	GO:0070887	0.00125658	2.90081	1716	4534	412	23191	AT2G04450,AT2G28230,AT5G66390,AT1G29395,AT5G14920,AT5G65310,AT1G75270,AT2G13810,AT4G26080,AT1G09210,AT5G20150,AT2G36390,AT3G51800,AT4G32570,AT3G10920,AT1G12630,AT2G28550,AT2G02390,AT4G22110,AT4G32330,AT3G22810,AT3G59940,AT4G34760,AT5G51060,AT4G25090,AT3G5
GO:BP	small molecule biosynthetic process	GO:0044283	0.00128231	2.89201	767	4534	203	23191	AT3G04080,AT1G15710,AT2G30490,AT4G22570,AT2G20690,AT3G57560,AT5G08740,AT4G39940,AT5G57440,AT1G79500,AT1G16340,AT1G48320,AT2G13810,AT5G53580,AT3G25900,AT1G06080,AT5G04760,AT1G50090,AT2G01140,AT5G03300,AT3G54010,AT2G30200,AT5G64370,AT1G64670,AT5G02890,AT4G1
GO:BP	cellular biosynthetic process	GO:0044249	0.0014114	2.85035	5589	4534	1215	23191	AT2G28510,AT3G04080,AT5G06000,AT3G11400,AT2G28230,AT2G28020,AT5G66390,AT1G68470,AT2G19730,AT2G38470,AT1G15710,AT3G12370,AT4G23100,AT5G27850,AT2G47570,AT2G30490,AT5G05090,AT5G23900,AT4G22570,AT5G47700,AT2G17040,AT4G16720,AT1G26880,AT5G15200,AT1G57650,AT5G4
GO:BP	cell cycle process	GO:0022402	0.00166883	2.77759	484	4534	137	23191	AT4G05360,AT3G51800,AT1G80710,AT3G10730,AT3G22880,AT1G70210,AT2G20960,AT5G03470,AT3G54710,AT1G14350,AT2G02820,AT4G35620,AT1G06660,AT1G61000,AT3G57860,AT1G07270,AT1G50490,AT2G20635,AT3G11520,AT1G31810,AT5G50375,AT1G76540,AT2G35190,AT3G14190,AT3G54180,AT2G3
GO:BP	cell wall organization	GO:0071555	0.00185461	2.73175	536	4534	149	23191	AT2G45220,AT5G16190,AT5G42100,AT4G23100,AT2G41800,AT1G12780,AT2G35650,AT1G79500,AT1G16340,AT2G28950,AT2G21140,AT2G44490,AT1G70710,AT1G23210,AT1G02810,AT1G49490,AT2G39700,AT1G27930,AT4G39010,AT4G38990,AT5G62360,AT1G63000,AT1G62700,AT1G64670,AT1G18570,AT3G1
GO:BP	macromolecule modification	GO:0043412	0.00212685	2.67226	3561	4534	798	23191	AT3G12690,AT1G68470,AT1G09160,AT4G35600,AT3G04910,AT5G47700,AT5G64660,Q9C6G4,AT4G02630,AT5G58300,AT1G56120,AT5G67250,AT1G73177,AT1G66830,AT2G31510,AT5G66570,AT4G36550,AT4G30510,AT1G73670,AT1G68330,AT1G75270,AT5G07070,AT1G48260,AT1G53190,AT2G38195,AT1G5229
GO:BP	response to osmotic stress	GO:0006970	0.00304413	2.51654	549	4534	151	23191	AT2G38470,AT4G12480,AT4G19810,AT5G06760,AT5G14920,AT2G47180,AT2G44490,AT1G44170,AT3G51390,AT3G23830,AT4G14300,AT3G61890,AT3G16690,AT5G62520,AT5G17490,AT4G24500,AT1G78310,AT1G72370,AT3G20290,AT1G60940,AT1G64670,AT3G54770,AT1G14350,AT2G02820,AT3G46550,AT2G3
GO:BP	cell cycle G1/S phase transition	GO:0044843	0.00347683	2.45882	12	4534	10	23191	AT3G51800,AT1G14350,AT2G02820,AT1G76540,AT3G54180,AT2G38620,AT4G34160,AT3G48750,AT3G25100,AT1G20930
GO:BP	response to light stimulus	GO:0009416	0.00489907	2.30989	746	4534	195	23191	AT2G05620,AT5G66570,AT5G08740,AT2G45260,AT4G32890,AT2G36390,AT5G23730,AT2G22630,AT3G23290,AT4G17490,AT1G73590,AT2G05070,AT3G02570,AT1G37130,AT1G75780,AT2G05100,AT3G46610,AT3G15620,AT5G47370,AT5G08790,AT1G69530,AT1G32870,AT4G32980,AT5G25830,AT4G01120,AT1G5
GO:BP	response to salt stress	GO:0009651	0.00653046	2.18506	470	4534	131	23191	AT2G38470,AT4G12480,AT4G19810,AT5G14920,AT2G47180,AT2G44490,AT1G44170,AT3G51390,AT3G23830,AT4G14300,AT5G62520,AT5G17490,AT4G24500,AT1G78310,AT1G72370,AT3G20290,AT1G60940,AT3G54770,AT1G14350,AT2G02820,AT3G46550,AT2G30250,AT4G28190,AT5G01520,AT1G13930,AT5G2
GO:BP	regulation of salicylic acid metabolic process	GO:0010337	0.00727293	2.13829	22	4534	14	23191	AT1G29690,AT5G22070,AT3G09830,AT4G25800,AT3G52430,AT2G39660,AT1G28380,AT4G13040,AT2G18750,AT5G57580,AT5G26920,AT2G41010,AT1G73805,AT1G05850
GO:BP	cellular amino acid biosynthetic process	GO:0008652	0.0112877	1.94739	233	4534	73	23191	AT1G15710,AT3G57560,AT4G39940,AT3G25900,AT1G50090,AT5G64370,AT4G22680,AT2G43100,AT3G58990,AT5G14200,AT1G31180,AT3G01120,AT1G33320,AT5G65780,AT2G26400,AT5G12200,AT3G03900,AT2G36230,AT2G44160,AT2G14750,AT1G79900,AT2G17265,AT3G23940,AT4G32520,AT1G11790,AT4G0
GO:BP	sulfur compound metabolic process	GO:0006790	0.0122421	1.91214	437	4534	122	23191	AT2G38470,AT4G23100,AT5G03880,AT5G43780,AT4G39940,AT1G75270,AT1G74100,AT2G44490,AT3G25900,AT1G01710,AT1G12630,AT3G28920,AT2G02390,AT5G63790,AT2G43910,AT1G08490,AT1G18570,AT2G20610,AT2G43100,AT1G16400,AT2G34590,AT3G58990,AT4G01120,AT5G14200,AT3G01120,AT1G3
GO:BP	microtubule-based process	GO:0007017	0.0155059	1.8095	243	4534	75	23191	AT2G45500,AT3G60660,AT4G32330,AT5G12250,AT5G66310,AT1G75780,AT1G61000,AT1G27920,AT2G21300,AT5G42380,AT2G38160,AT2G25880,AT3G49650,AT5G55280,AT3G05750,AT2G44190,AT2G28620,AT3G23090,AT5G17410,AT3G55000,AT3G60840,AT1G50710,AT3G10180,AT5G02370,AT5G28290,AT3G4
GO:BP	carboxylic acid metabolic process	GO:0019752	0.0164116	1.78485	1049	4534	259	23191	AT1G15710,AT1G64400,AT1G29690,AT4G23590,AT3G57560,AT5G56720,AT4G39940,AT5G47120,AT2G13810,AT3G25900,AT1G06080,AT1G01710,AT5G04760,AT1G50090,AT5G54080,AT2G01140,AT2G02390,AT4G37150,AT3G54010,AT2G30200,AT5G26830,AT5G64370,AT1G64670,AT1G08490,AT5G02890,AT1G1
GO:BP	response to radiation	GO:0009314	0.0184261	1.73457	770	4534	197	23191	AT2G05620,AT5G66570,AT5G08740,AT2G45260,AT4G32890,AT2G36390,AT5G23730,AT3G22880,AT2G22630,AT3G23290,AT4G17490,AT1G73590,AT2G05070,AT3G02570,AT1G37130,AT1G75780,AT2G05100,AT3G46610,AT3G15620,AT5G47370,AT5G08790,AT1G69530,AT1G32870,AT4G32980,AT5G25830,AT4G0
GO:BP	pigment biosynthetic process	GO:0046148	0.0188907	1.72375	165	4534	55	23191	AT4G22570,AT4G17600,AT2G25180,AT3G59400,AT3G58110,AT1G06820,AT1G09932,AT4G22880,AT5G08640,AT3G29590,AT3G51820,AT5G46760,AT2G26540,AT4G01900,AT3G55010,AT4G31390,AT2G02990,AT1G09830,AT3G21560,AT5G49330,AT5G49650,AT2G41680,AT5G54060,AT4G18480,AT5G26030,AT1G3
GO:BP	sulfur compound biosynthetic process	GO:0044272	0.0193699	1.71287	169	4534	56	23191	AT2G38470,AT4G23100,AT5G43780,AT4G39940,AT1G74100,AT3G25900,AT1G18570,AT2G20610,AT2G43100,AT1G16400,AT2G34590,AT3G58990,AT5G14200,AT3G01120,AT1G33320,AT2G26400,AT5G07690,AT3G03900,AT2G44160,AT3G17390,AT2G14750,AT3G19710,AT2G17265,AT1G18590,AT1G60810,AT3G5
GO:BP	carbohydrate metabolic process	GO:0005975	0.0227846	1.64236	1196	4534	290	23191	AT1G38131,AT1G38065,AT2G45220,AT1G52630,AT5G42100,AT4G19810,AT4G19770,AT4G00110,AT2G41800,AT1G12780,AT5G56720,AT1G67750,AT1G10640,AT5G40610,AT5G57440,AT1G79500,AT1G16340,AT1G30080,AT5G11720,AT2G47180,AT2G44490,AT1G17160,AT5G65470,AT1G70710,AT1G23210,AT1G0
GO:BP	response to water	GO:0009415	0.0314282	1.50268	411	4534	114	23191	AT2G38470,AT1G29395,AT2G05620,AT5G06760,AT4G00430,AT5G47120,AT2G47180,AT1G44170,AT1G80710,AT3G23830,AT4G14300,AT5G13030,AT3G61890,AT3G20660,AT1G64670,AT4G27410,AT1G08720,AT3G54770,AT2G05070,AT1G14350,AT2G02820,AT1G52890,AT2G25180,AT2G05100,AT3G47600,AT1G1
GO:BP	response to acid chemical	GO:0001101	0.0348037	1.45837	442	4534	121	23191	AT2G38470,AT1G29395,AT2G05620,AT5G06760,AT4G00430,AT5G47120,AT2G47180,AT1G44170,AT1G80710,AT3G23830,AT4G14300,AT5G13030,AT3G61890,AT3G20660,AT1G64670,AT4G27410,AT1G08720,AT3G54770,AT2G05070,AT1G14350,AT2G02820,AT1G52890,AT2G25180,AT2G05100,AT3G47600,AT1G1
GO:BP	glycosyl compound metabolic process	GO:1901657	0.0352986	1.45224	184	4534	59	23191	AT4G28940,AT4G23100,AT4G22570,AT1G74100,AT2G44490,AT1G17160,AT1G10700,AT5G03300,AT1G12630,AT3G28920,AT4G26510,AT5G63790,AT2G43910,AT1G18570,AT2G20610,AT2G43100,AT3G53900,AT1G16400,AT5G18860,AT3G58990,AT4G01120,AT5G14200,AT5G07690,AT2G22840,AT3G54470,AT3G1
GO:BP	pigment metabolic process	GO:0042440	0.0425688	1.37091	201	4534	63	23191	AT4G22570,AT2G26550,AT4G17600,AT2G25180,AT5G13800,AT4G27830,AT3G59400,AT3G58110,AT1G06820,AT1G09932,AT4G22880,AT5G08640,AT3G29590,AT3G51820,AT5G46760,AT2G26540,AT5G11260,AT4G01900,AT3G55010,AT4G31390,AT2G02990,AT1G44000,AT1G09830,AT3G21560,AT4G11910,AT5G4
GO:BP	response to water deprivation	GO:0009414	0.0486276	1.31312	402	4534	111	23191	AT2G38470,AT1G29395,AT2G05620,AT5G06760,AT4G00430,AT5G47120,AT2G47180,AT1G44170,AT1G80710,AT3G23830,AT4G14300,AT5G13030,AT3G61890,AT3G20660,AT1G64670,AT4G27410,AT1G08720,AT3G54770,AT2G05070,AT1G14350,AT2G02820,AT1G52890,AT2G25180,AT2G05100,AT3G47600,AT1G1
GO:CC	cell periphery	GO:0071944	4.19194e-16	15.3776	4164	4217	1045	20918	AT3G12690,AT2G45220,AT5G40780,AT5G04920,AT5G06000,AT3G11400,AT5G66390,AT5G07910,AT2G33030,AT2G19730,AT4G12480,AT1G09160,AT1G30360,AT4G35600,AT5G42100,AT5G65830,AT4G19810,AT5G01170,AT2G30490,AT3G19540,AT1G29690,AT5G47700,AT4G31840,AT4G16720,Q9C6G4,AT5G1520
GO:CC	intracellular anatomical structure	GO:0005622	1.0056e-14	13.9976	14657	4217	3173	20918	AT5G14540,AT4G21570,AT1G73875,AT3G12690,AT2G28510,AT3G11270,AT2G04450,AT5G40780,AT1G52630,AT5G04920,AT3G04080,AT5G06000,AT3G11400,AT2G28230,AT2G28020,AT5G66390,AT3G60830,AT1G68470,AT2G19730,AT2G38470,AT4G17890,AT4G12480,AT2G27730,AT4G16440,AT1G15710,AT1G2
GO:CC	plasma membrane	GO:0005886	7.11107e-11	10.1481	3465	4217	857	20918	AT3G12690,AT5G40780,AT5G04920,AT5G06000,AT3G11400,AT5G07910,AT2G33030,AT2G19730,AT1G09160,AT1G30360,AT4G35600,AT5G42100,AT5G65830,AT5G01170,AT2G30490,AT3G19540,AT1G29690,AT5G47700,AT4G31840,AT4G16720,Q9C6G4,AT5G03880,AT4G02630,AT2G01340,AT2G23830,AT5G5830
GO:CC	cell wall	GO:0005618	2.36412e-10	9.62633	793	4217	242	20918	AT2G45220,AT5G66390,AT2G19730,AT4G12480,AT5G42100,AT4G19810,AT2G30490,AT5G15200,AT2G02100,AT2G41800,AT1G10640,AT5G20890,AT2G28950,AT2G21140,AT5G57620,AT5G47550,AT1G02810,AT1G49490,AT5G22650,AT2G39700,AT5G11920,AT5G26830,AT5G22200,AT1G73590,AT1G64670,AT5G6
GO:CC	cytoplasm	GO:0005737	3.50531e-10	9.45527	10839	4217	2387	20918	AT5G14540,AT4G21570,AT1G73875,AT3G12690,AT3G11270,AT2G04450,AT5G40780,AT1G52630,AT5G04920,AT3G04080,AT5G06000,AT3G11400,AT5G66390,AT3G60830,AT1G68470,AT2G19730,AT4G17890,AT4G12480,AT2G27730,AT4G16440,AT1G15710,AT1G29395,AT5G16190,AT1G30360,AT3G54150,AT2G0
GO:CC	intracellular organelle	GO:0043229	4.24161e-10	9.37247	13107	4217	2836	20918	AT4G21570,AT1G73875,AT3G12690,AT2G28510,AT3G11270,AT5G40780,AT5G04920,AT3G04080,AT2G28230,AT2G28020,AT5G66390,AT3G60830,AT1G68470,AT2G19730,AT2G38470,AT4G17890,AT4G12480,AT2G27730,AT4G16440,AT1G15710,AT1G29395,AT5G16190,AT1G30360,AT3G54150,AT4G35600,AT2G0
GO:CC	external encapsulating structure	GO:0030312	2.25924e-09	8.64604	813	4217	243	20918	AT2G45220,AT5G66390,AT2G19730,AT4G12480,AT5G42100,AT4G19810,AT2G30490,AT5G15200,AT2G02100,AT2G41800,AT1G10640,AT5G20890,AT2G28950,AT2G21140,AT5G57620,AT5G47550,AT1G02810,AT1G49490,AT5G22650,AT2G39700,AT5G11920,AT3G26520,AT5G26830,AT5G22200,AT1G73590,AT1G6
GO:CC	organelle	GO:0043226	1.20244e-08	7.91994	13176	4217	2836	20918	AT4G21570,AT1G73875,AT3G12690,AT2G28510,AT3G11270,AT5G40780,AT5G04920,AT3G04080,AT2G28230,AT2G28020,AT5G66390,AT3G60830,AT1G68470,AT2G19730,AT2G38470,AT4G17890,AT4G12480,AT2G27730,AT4G16440,AT1G15710,AT1G29395,AT5G16190,AT1G30360,AT3G54150,AT4G35600,AT2G0
GO:CC	cellular anatomical entity	GO:0110165	2.52104e-08	7.59842	20064	4217	4114	20918	AT5G14540,AT4G21570,AT1G73875,AT4G24180,AT1G38131,AT3G12690,AT2G28510,AT2G45220,AT3G11270,AT2G04450,AT5G40780,AT1G52630,AT5G04920,AT3G04080,AT5G06000,AT3G11400,AT2G28230,AT2G28020,AT5G66390,AT3G60830,AT5G07910,AT2G33030,AT1G68470,AT2G19730,AT3G15350,AT2G3
GO:CC	plant-type cell wall	GO:0009505	3.20524e-08	7.49414	237	4217	90	20918	AT5G66390,AT4G12480,AT5G42100,AT2G30490,AT2G02100,AT2G41800,AT2G28950,AT5G57620,AT2G39700,AT5G22200,AT1G73590,AT1G64670,AT5G20080,AT5G22070,AT5G64120,AT2G28670,AT5G16590,AT1G69530,AT5G26670,AT3G05910,AT2G37130,AT1G18140,AT1G26770,AT2G34060,AT5G51550,AT1G7
GO:CC	intracellular membrane-bounded organelle	GO:0043231	5.0475e-07	6.29692	12641	4217	2714	20918	AT4G21570,AT1G73875,AT3G12690,AT2G28510,AT3G11270,AT5G40780,AT5G04920,AT3G04080,AT2G28230,AT2G28020,AT5G66390,AT3G60830,AT1G68470,AT2G19730,AT2G38470,AT4G17890,AT4G12480,AT2G27730,AT4G16440,AT1G15710,AT1G29395,AT5G16190,AT1G30360,AT3G54150,AT4G35600,AT2G0
GO:CC	polysomal ribosome	GO:0042788	1.5626e-06	5.80615	98	4217	45	20918	AT4G16720,AT5G15200,AT5G02870,AT2G41840,AT4G27090,AT3G53870,AT4G31700,AT1G72370,AT4G15000,AT3G04840,AT4G18100,AT3G24830,AT5G59850,AT3G46040,AT5G15650,AT3G02230,AT3G04920,AT5G10360,AT4G10450,AT3G17820,AT3G09200,AT5G20290,AT1G02780,AT3G23990,AT1G14320,AT2G0
GO:CC	cytosolic ribosome	GO:0022626	2.1488e-06	5.6678	326	4217	109	20918	AT2G19730,AT5G27850,AT2G47570,AT5G23900,AT5G47700,AT4G16720,AT1G26880,AT5G15200,AT5G02870,AT2G41840,AT4G27090,AT5G35530,AT3G53870,AT3G62250,AT4G13170,AT4G31700,AT3G44590,AT4G25090,AT1G72370,AT4G15000,AT2G32220,AT3G04840,AT5G58420,AT4G29410,AT4G18100,AT3G2
GO:CC	ribosome	GO:0005840	8.6983e-06	5.06057	528	4217	158	20918	AT2G19730,AT3G12370,AT5G27850,AT2G47570,AT5G23900,AT5G47700,AT4G16720,AT1G26880,AT5G15200,AT1G57650,AT5G02870,AT2G41840,AT4G27090,AT5G35530,AT3G53870,AT3G62250,AT4G13170,AT4G31700,AT3G44590,AT4G25090,AT1G05190,AT1G72370,AT5G17870,AT1G48350,AT1G31817,AT4G1
GO:CC	membrane-bounded organelle	GO:0043227	1.43785e-05	4.84229	12724	4217	2714	20918	AT4G21570,AT1G73875,AT3G12690,AT2G28510,AT3G11270,AT5G40780,AT5G04920,AT3G04080,AT2G28230,AT2G28020,AT5G66390,AT3G60830,AT1G68470,AT2G19730,AT2G38470,AT4G17890,AT4G12480,AT2G27730,AT4G16440,AT1G15710,AT1G29395,AT5G16190,AT1G30360,AT3G54150,AT4G35600,AT2G0
GO:CC	polysome	GO:0005844	1.84116e-05	4.73491	108	4217	46	20918	AT4G16720,AT5G15200,AT5G02870,AT2G41840,AT4G27090,AT3G53870,AT4G31700,AT1G72370,AT4G15000,AT3G04840,AT4G18100,AT3G24830,AT5G59850,AT3G46040,AT5G15650,AT3G02230,AT3G04920,AT5G10360,AT4G10450,AT3G17820,AT3G09200,AT5G20290,AT1G02780,AT3G23990,AT4G38090,AT1G1
GO:CC	ribosomal subunit	GO:0044391	3.1035e-05	4.50815	345	4217	110	20918	AT2G19730,AT3G12370,AT5G27850,AT2G47570,AT5G23900,AT5G47700,AT4G16720,AT1G26880,AT5G15200,AT5G02870,AT2G41840,AT4G27090,AT5G35530,AT3G53870,AT3G62250,AT4G13170,AT4G31700,AT3G44590,AT1G72370,AT1G31817,AT4G15000,AT2G32220,AT3G04840,AT3G17465,AT4G39880,AT5G5
GO:CC	symplast	GO:0055044	0.000108193	3.9658	968	4217	257	20918	AT2G19730,AT4G12480,AT1G30360,AT5G42100,AT5G27850,AT4G13950,AT2G30490,AT3G16470,AT5G15200,AT3G12870,AT5G02870,AT2G41800,AT2G41840,AT4G00430,AT2G18730,AT5G48380,AT4G27090,AT2G41475,AT5G35530,AT3G53870,AT2G39700,AT1G44170,AT4G31700,AT4G12520,AT4G12510,AT4G3
GO:CC	plasmodesma	GO:0009506	0.00014589	3.83597	967	4217	256	20918	AT2G19730,AT4G12480,AT1G30360,AT5G42100,AT5G27850,AT4G13950,AT2G30490,AT3G16470,AT5G15200,AT3G12870,AT5G02870,AT2G41800,AT2G41840,AT4G00430,AT2G18730,AT5G48380,AT4G27090,AT2G41475,AT5G35530,AT3G53870,AT2G39700,AT1G44170,AT4G31700,AT4G12520,AT4G12510,AT4G3
GO:CC	cell-cell junction	GO:0005911	0.00014589	3.83597	967	4217	256	20918	AT2G19730,AT4G12480,AT1G30360,AT5G42100,AT5G27850,AT4G13950,AT2G30490,AT3G16470,AT5G15200,AT3G12870,AT5G02870,AT2G41800,AT2G41840,AT4G00430,AT2G18730,AT5G48380,AT4G27090,AT2G41475,AT5G35530,AT3G53870,AT2G39700,AT1G44170,AT4G31700,AT4G12520,AT4G12510,AT4G3
GO:CC	anchoring junction	GO:0070161	0.00014589	3.83597	967	4217	256	20918	AT2G19730,AT4G12480,AT1G30360,AT5G42100,AT5G27850,AT4G13950,AT2G30490,AT3G16470,AT5G15200,AT3G12870,AT5G02870,AT2G41800,AT2G41840,AT4G00430,AT2G18730,AT5G48380,AT4G27090,AT2G41475,AT5G35530,AT3G53870,AT2G39700,AT1G44170,AT4G31700,AT4G12520,AT4G12510,AT4G3
GO:CC	cell junction	GO:0030054	0.000190233	3.72072	970	4217	256	20918	AT2G19730,AT4G12480,AT1G30360,AT5G42100,AT5G27850,AT4G13950,AT2G30490,AT3G16470,AT5G15200,AT3G12870,AT5G02870,AT2G41800,AT2G41840,AT4G00430,AT2G18730,AT5G48380,AT4G27090,AT2G41475,AT5G35530,AT3G53870,AT2G39700,AT1G44170,AT4G31700,AT4G12520,AT4G12510,AT4G3
GO:CC	chloroplast	GO:0009507	0.000225297	3.64724	2449	4217	584	20918	AT2G19730,AT4G12480,AT1G15710,AT1G29395,AT1G30360,AT2G05620,AT4G23100,AT1G71480,AT3G16470,AT5G15200,AT5G03880,AT5G43780,AT3G49560,AT4G14570,AT2G20690,AT1G73170,AT3G57560,AT5G66570,AT5G40610,AT5G08740,AT4G39940,AT2G33255,AT2G44490,AT1G22700,AT1G74640,AT1G1
GO:CC	plastid	GO:0009536	0.000284394	3.54608	2977	4217	697	20918	AT5G40780,AT2G19730,AT4G12480,AT1G15710,AT1G29395,AT1G30360,AT2G05620,AT4G23100,AT5G27850,AT1G71480,AT3G16470,AT5G23900,AT5G47700,AT5G15200,AT5G03880,AT5G43780,AT3G49560,AT4G14570,AT5G14920,AT2G20690,AT1G73170,AT3G57560,AT5G56720,AT5G66570,AT5G20890,AT5G4
GO:CC	microtubule cytoskeleton	GO:0015630	0.000351451	3.45413	305	4217	96	20918	AT3G60830,AT2G45500,AT3G60660,AT4G32330,AT3G10730,AT2G02790,AT5G12250,AT5G66310,AT1G75780,AT1G31810,AT3G15220,AT5G07590,AT1G27920,AT2G21300,AT5G22370,AT5G56180,AT4G02570,AT2G38160,AT2G25880,AT3G63130,AT3G26050,AT3G49650,AT5G55280,AT3G05750,AT2G44190,AT2G2
GO:CC	cytosolic large ribosomal subunit	GO:0022625	0.00045657	3.34049	147	4217	54	20918	AT2G19730,AT5G27850,AT2G47570,AT5G23900,AT5G47700,AT4G16720,AT1G26880,AT5G02870,AT4G27090,AT4G13170,AT3G44590,AT4G15000,AT2G32220,AT4G29410,AT4G18100,AT3G24830,AT1G32990,AT1G33140,AT1G33120,AT4G10450,AT2G42710,AT1G57660,AT3G09200,AT1G02780,AT1G18540,AT1G1
GO:CC	anchored component of plasma membrane	GO:0046658	0.000506807	3.29516	173	4217	61	20918	AT5G42100,AT4G31840,AT5G20890,AT1G30080,AT4G27520,AT1G21880,AT3G46900,AT2G13820,AT5G22200,AT5G18610,AT3G46550,AT4G28100,AT2G04780,AT4G23950,AT2G45470,AT5G58090,AT5G67460,AT4G29360,AT5G55180,AT4G26830,AT5G61130,AT5G44130,AT2G01630,AT5G53870,AT2G17120,AT4G1
GO:CC	intrinsic component of plasma membrane	GO:0031226	0.000526274	3.27879	280	4217	89	20918	AT5G42100,AT4G31840,AT5G20890,AT1G30080,AT4G27520,AT1G21880,AT3G52640,AT3G46900,AT5G51060,AT1G15080,AT3G16690,AT2G13820,AT5G22200,AT5G18610,AT3G46550,AT4G28100,AT2G04780,AT1G27770,AT4G23950,AT2G45470,AT1G21460,AT5G58090,AT5G67460,AT4G29360,AT5G55180,AT4G2
GO:CC	endomembrane system	GO:0012505	0.000816759	3.08791	2561	4217	603	20918	AT4G21570,AT5G04920,AT3G04080,AT1G68470,AT4G17890,AT4G12480,AT5G16190,AT5G42100,AT1G64400,AT1G02690,AT2G30490,AT1G09580,AT1G77140,AT1G33490,AT2G23830,AT5G65687,AT4G00110,AT5G10780,AT1G07230,AT1G80860,AT2G35650,AT2G33255,AT3G03180,AT1G62430,AT5G47120,AT2G2
GO:CC	microtubule	GO:0005874	0.00436489	2.36003	242	4217	76	20918	AT3G60660,AT4G32330,AT5G12250,AT5G66310,AT1G75780,AT1G27920,AT2G21300,AT5G22370,AT2G38160,AT2G25880,AT3G26050,AT3G49650,AT5G55280,AT2G44190,AT2G28620,AT3G23090,AT3G60190,AT2G44590,AT5G17410,AT2G33560,AT3G01710,AT3G60840,AT1G50710,AT3G10180,AT5G02370,AT5G2
GO:CC	secretory vesicle	GO:0099503	0.00499638	2.30134	173	4217	58	20918	AT4G12480,AT4G19810,AT4G31840,AT1G09210,AT4G27520,AT3G44590,AT3G07460,AT5G64120,AT2G04780,AT1G76160,AT2G45470,AT1G21680,AT2G43570,AT1G77510,AT1G30720,AT1G03220,AT4G24190,AT2G14260,AT5G48540,AT1G09750,AT1G11840,AT1G21350,AT3G25220,AT1G78830,AT2G01210,AT4G1
GO:CC	chloroplast stroma	GO:0009570	0.00551652	2.25833	787	4217	205	20918	AT4G23100,AT5G43780,AT3G57560,AT5G66570,AT5G08740,AT1G17160,AT2G36390,AT2G01140,AT3G58010,AT5G63060,AT5G13030,AT2G30200,AT3G10670,AT1G05190,AT5G14660,AT1G48350,AT1G08490,AT3G06730,AT4G09040,AT2G05070,AT2G02740,AT2G05100,AT2G43100,AT3G46610,AT3G53900,AT1G5
GO:CC	plastid stroma	GO:0009532	0.00976582	2.01029	794	4217	205	20918	AT4G23100,AT5G43780,AT3G57560,AT5G66570,AT5G08740,AT1G17160,AT2G36390,AT2G01140,AT3G58010,AT5G63060,AT5G13030,AT2G30200,AT3G10670,AT1G05190,AT5G14660,AT1G48350,AT1G08490,AT3G06730,AT4G09040,AT2G05070,AT2G02740,AT2G05100,AT2G43100,AT3G46610,AT3G53900,AT1G5
GO:CC	cytosolic small ribosomal subunit	GO:0022627	0.0100089	1.99962	113	4217	41	20918	AT5G15200,AT2G41840,AT5G35530,AT3G53870,AT3G62250,AT4G31700,AT1G72370,AT3G04840,AT5G58420,AT1G73180,AT5G59850,AT3G46040,AT5G62300,AT3G45030,AT3G04920,AT5G10360,AT5G20290,AT4G39200,AT1G79850,AT3G48930,AT5G61170,AT3G18130,AT1G15930,AT2G32060,AT3G11940,AT2G3
GO:CC	polymeric cytoskeletal fiber	GO:0099513	0.0109742	1.95963	252	4217	77	20918	AT3G60660,AT4G32330,AT5G12250,AT5G66310,AT1G75780,AT1G27920,AT2G21300,AT5G22370,AT2G38160,AT2G25880,AT3G26050,AT3G49650,AT5G55280,AT2G44190,AT2G28620,AT3G23090,AT3G60190,AT2G44590,AT5G17410,AT2G33560,AT3G01710,AT3G60840,AT1G50710,AT3G10180,AT5G02370,AT5G2
GO:CC	supramolecular fiber	GO:0099512	0.0109742	1.95963	252	4217	77	20918	AT3G60660,AT4G32330,AT5G12250,AT5G66310,AT1G75780,AT1G27920,AT2G21300,AT5G22370,AT2G38160,AT2G25880,AT3G26050,AT3G49650,AT5G55280,AT2G44190,AT2G28620,AT3G23090,AT3G60190,AT2G44590,AT5G17410,AT2G33560,AT3G01710,AT3G60840,AT1G50710,AT3G10180,AT5G02370,AT5G2
GO:CC	supramolecular polymer	GO:0099081	0.0109742	1.95963	252	4217	77	20918	AT3G60660,AT4G32330,AT5G12250,AT5G66310,AT1G75780,AT1G27920,AT2G21300,AT5G22370,AT2G38160,AT2G25880,AT3G26050,AT3G49650,AT5G55280,AT2G44190,AT2G28620,AT3G23090,AT3G60190,AT2G44590,AT5G17410,AT2G33560,AT3G01710,AT3G60840,AT1G50710,AT3G10180,AT5G02370,AT5G2
GO:CC	anchored component of membrane	GO:0031225	0.0230781	1.6368	331	4217	95	20918	AT5G42100,AT4G31840,AT4G38660,AT2G20700,AT1G29980,AT5G20890,AT1G30080,AT4G27520,AT1G21880,AT3G46900,AT5G60490,AT2G13820,AT5G22200,AT1G18650,AT5G18610,AT3G46550,AT4G28100,AT2G04780,AT1G69295,AT4G23950,AT2G45470,AT5G58090,AT5G67460,AT4G29360,AT3G18050,AT5G5
GO:CC	cytosol	GO:0005829	0.0290137	1.5374	3389	4217	762	20918	AT5G14540,AT3G11270,AT2G04450,AT3G11400,AT3G60830,AT2G19730,AT4G17890,AT4G16440,AT3G54150,AT4G23100,AT5G27850,AT2G47570,AT3G16470,AT5G23900,AT4G22570,AT5G06760,AT5G47700,AT4G16720,AT1G26880,AT5G15200,AT3G49560,AT2G17940,AT4G14570,AT2G42560,AT5G02870,AT1G1
GO:CC	large ribosomal subunit	GO:0015934	0.0303233	1.51822	195	4217	61	20918	AT2G19730,AT3G12370,AT5G27850,AT2G47570,AT5G23900,AT5G47700,AT4G16720,AT1G26880,AT5G02870,AT4G27090,AT4G13170,AT3G44590,AT4G15000,AT2G32220,AT3G17465,AT4G39880,AT4G29410,AT4G18100,AT3G24830,AT1G32990,AT1G07320,AT1G33140,AT1G33120,AT4G10450,AT2G42710,AT1G5
GO:CC	small ribosomal subunit	GO:0015935	0.0417183	1.37967	150	4217	49	20918	AT5G15200,AT2G41840,AT5G35530,AT3G53870,AT3G62250,AT4G31700,AT1G72370,AT1G31817,AT3G04840,AT5G58420,AT3G18240,AT4G21460,AT1G73180,AT3G22300,AT5G59850,AT3G46040,AT1G64880,AT5G62300,AT3G45030,AT3G04920,AT5G10360,AT5G20290,AT4G39200,AT1G79850,AT3G48930,AT5G6
KEGG	Ribosome	KEGG:03010	3.23733e-06	5.48981	326	1117	114	4970	AT2G19730,AT3G12370,AT5G27850,AT2G47570,AT5G23900,AT5G47700,AT4G16720,AT1G26880,AT5G15200,AT5G02870,AT2G41840,AT4G27090,AT5G35530,AT3G53870,AT3G62250,AT4G13170,AT4G31700,AT3G44590,AT1G05190,AT1G72370,AT1G48350,AT4G15000,AT2G32220,AT3G04840,AT3G17465,AT4G3
KEGG	Glucosinolate biosynthesis	KEGG:00966	0.000952242	3.02125	26	1117	16	4970	AT1G74100,AT1G50090,AT2G20610,AT2G43100,AT1G16400,AT3G58990,AT5G14200,AT5G65780,AT3G19710,AT1G18590,AT1G74090,AT4G13430,AT5G23020,AT1G24100,AT4G13770,AT3G49680
KEGG	Glycerophospholipid metabolism	KEGG:00564	0.00146001	2.83564	98	1117	40	4970	AT1G73600,AT1G07230,AT1G80860,AT5G40610,AT1G62430,AT2G18730,AT1G15080,AT1G74210,AT5G43300,AT3G60620,AT2G20900,AT2G41540,AT3G02600,AT2G39290,AT4G30340,AT2G40690,AT5G04040,AT2G06925,AT3G18000,AT3G03310,AT1G13560,AT4G25970,AT3G57650,AT4G15130,AT4G16700,AT3G1
KEGG	Valine, leucine and isoleucine biosynthesis	KEGG:00290	0.0283217	1.54788	21	1117	12	4970	AT1G50090,AT2G43100,AT3G58990,AT5G14200,AT1G31180,AT5G65780,AT3G23940,AT4G13430,AT3G48560,AT1G18500,AT2G31810,AT3G49680
KEGG	Biosynthesis of secondary metabolites	KEGG:01110	0.0363106	1.43997	1236	1117	319	4970	AT5G66390,AT1G15710,AT2G30490,AT5G43780,AT2G20690,AT4G23590,AT1G07230,AT3G57560,AT5G56720,AT1G80860,AT5G40610,AT5G08740,AT1G74100,AT1G62430,AT1G48320,AT5G11720,AT2G44490,AT2G18730,AT2G13810,AT3G25900,AT5G11920,AT1G44170,AT2G36390,AT1G01710,AT1G50090,AT2G0

## Sheet: plum1
File S1b: functional enrichment of the genes from the plum1 module of A. halleri
source	term_name	term_id	adjusted_p_value	negative_log10_of_adjusted_p_value	term_size	query_size	intersection_size	effective_domain_size	intersections
GO:MF	GTP binding	GO:0005525	4.58116e-06	5.33902	303	1630	53	21313	AT1G77840,AT1G70490,AT5G60860,AT1G18070,AT1G49300,AT4G14960,AT1G20090,AT3G03120,AT4G18430,AT5G03520,AT4G39890,AT5G45130,AT1G23490,AT2G47170,AT4G39520,AT4G28950,AT5G52210,AT5G19770,AT1G75840,AT1G33920,AT1G62750,AT5G55540,AT3G07050,AT5G13650,AT2G15310,AT2G1
GO:MF	guanyl nucleotide binding	GO:0019001	4.1024e-05	4.38696	323	1630	53	21313	AT1G77840,AT1G70490,AT5G60860,AT1G18070,AT1G49300,AT4G14960,AT1G20090,AT3G03120,AT4G18430,AT5G03520,AT4G39890,AT5G45130,AT1G23490,AT2G47170,AT4G39520,AT4G28950,AT5G52210,AT5G19770,AT1G75840,AT1G33920,AT1G62750,AT5G55540,AT3G07050,AT5G13650,AT2G15310,AT2G1
GO:MF	guanyl ribonucleotide binding	GO:0032561	4.1024e-05	4.38696	323	1630	53	21313	AT1G77840,AT1G70490,AT5G60860,AT1G18070,AT1G49300,AT4G14960,AT1G20090,AT3G03120,AT4G18430,AT5G03520,AT4G39890,AT5G45130,AT1G23490,AT2G47170,AT4G39520,AT4G28950,AT5G52210,AT5G19770,AT1G75840,AT1G33920,AT1G62750,AT5G55540,AT3G07050,AT5G13650,AT2G15310,AT2G1
GO:MF	GTPase activity	GO:0003924	0.000248326	3.60498	211	1630	38	21313	AT5G60860,AT1G18070,AT1G49300,AT4G14960,AT1G20090,AT4G18430,AT5G03520,AT4G39890,AT5G45130,AT4G39520,AT4G28950,AT5G19770,AT1G75840,AT1G62750,AT5G13650,AT3G61650,AT5G08650,AT5G47200,AT5G49500,AT1G52280,AT5G65270,AT2G45030,AT5G40580,AT3G49870,AT4G19640,AT4G1
GO:MF	nucleoside-triphosphatase activity	GO:0017111	0.000816676	3.08795	300	1630	47	21313	AT5G20110,AT1G20060,AT5G60860,AT1G18070,AT1G49300,AT4G14960,AT1G20090,AT5G41310,AT4G18430,AT2G47500,AT5G03520,AT4G39890,AT5G45130,AT4G39520,AT4G28950,AT5G19770,AT1G75840,AT1G62750,AT5G06670,AT5G13650,AT3G61650,AT2G31900,AT5G08650,AT2G37420,AT5G47200,AT5G4
GO:MF	proteasome-activating activity	GO:0036402	0.00154022	2.81242	11	1630	7	21313	AT1G53750,AT5G58290,AT5G19990,AT4G29040,AT1G09100,AT1G53780,AT1G45000
GO:MF	binding	GO:0005488	0.0023497	2.62899	14667	1630	1200	21313	AT3G08620,AT2G04450,AT4G03190,AT3G22990,AT3G53750,AT1G61580,AT1G04750,AT1G49200,AT1G13180,AT1G54060,AT2G44840,AT3G01830,AT5G18580,AT5G20110,AT3G12040,AT1G54140,AT1G77840,AT5G42980,AT1G49850,AT5G58860,AT5G51700,AT1G29730,AT4G21450,AT1G53750,AT3G61190,AT1G5
GO:MF	pyrophosphatase activity	GO:0016462	0.00349604	2.45642	363	1630	52	21313	AT2G04450,AT5G20110,AT1G20060,AT5G60860,AT1G18070,AT1G49300,AT4G14960,AT1G20090,AT4G24730,AT5G41310,AT4G18430,AT2G47500,AT5G03520,AT4G39890,AT5G45130,AT4G39520,AT4G28950,AT1G26190,AT5G19770,AT1G75840,AT1G62750,AT5G06670,AT5G13650,AT3G61650,AT2G31900,AT5G0
GO:MF	hydrolase activity, acting on acid anhydrides, in phosphorus-containing anhydrides	GO:0016818	0.00458501	2.33866	376	1630	53	21313	AT2G04450,AT5G20110,AT1G20060,AT5G60860,AT1G18070,AT1G49300,AT4G14960,AT1G20090,AT4G24730,AT5G41310,AT4G18430,AT2G47500,AT5G03520,AT4G39890,AT5G45130,AT4G39520,AT4G28950,AT1G26190,AT1G79950,AT5G19770,AT1G75840,AT1G62750,AT5G06670,AT5G13650,AT3G61650,AT2G3
GO:MF	hydrolase activity, acting on acid anhydrides	GO:0016817	0.00773534	2.11152	383	1630	53	21313	AT2G04450,AT5G20110,AT1G20060,AT5G60860,AT1G18070,AT1G49300,AT4G14960,AT1G20090,AT4G24730,AT5G41310,AT4G18430,AT2G47500,AT5G03520,AT4G39890,AT5G45130,AT4G39520,AT4G28950,AT1G26190,AT1G79950,AT5G19770,AT1G75840,AT1G62750,AT5G06670,AT5G13650,AT3G61650,AT2G3
GO:MF	purine ribonucleoside triphosphate binding	GO:0035639	0.0117907	1.92846	2790	1630	268	21313	AT3G53750,AT1G13180,AT1G77840,AT1G29730,AT1G53750,AT1G50480,AT5G25440,AT1G20060,AT2G33210,AT1G70490,AT5G60860,AT1G62950,AT5G52640,AT1G70430,AT1G18070,AT1G78290,AT1G12580,AT3G07350,AT1G06750,AT5G51290,AT1G49300,AT5G58290,AT5G19990,AT1G16030,AT5G09810,AT4G1
GO:MF	nucleotide binding	GO:0000166	0.0141696	1.84864	3251	1630	306	21313	AT2G04450,AT3G53750,AT1G13180,AT1G77840,AT1G29730,AT1G53750,AT1G50480,AT5G25440,AT1G20060,AT2G33210,AT1G70490,AT5G60860,AT1G62950,AT5G52640,AT2G47590,AT1G70430,AT1G18070,AT5G49970,AT1G78290,AT1G12580,AT3G07350,AT1G06750,AT5G51290,AT1G49300,AT5G58290,AT5G1
GO:MF	nucleoside phosphate binding	GO:1901265	0.0141696	1.84864	3251	1630	306	21313	AT2G04450,AT3G53750,AT1G13180,AT1G77840,AT1G29730,AT1G53750,AT1G50480,AT5G25440,AT1G20060,AT2G33210,AT1G70490,AT5G60860,AT1G62950,AT5G52640,AT2G47590,AT1G70430,AT1G18070,AT5G49970,AT1G78290,AT1G12580,AT3G07350,AT1G06750,AT5G51290,AT1G49300,AT5G58290,AT5G1
GO:MF	small molecule binding	GO:0036094	0.0157045	1.80397	3460	1630	323	21313	AT2G04450,AT4G03190,AT3G53750,AT1G13180,AT1G77840,AT1G29730,AT1G53750,AT1G50480,AT5G25440,AT1G20060,AT2G33210,AT1G70490,AT5G60860,AT1G62950,AT5G52640,AT2G47590,AT1G70430,AT1G18070,AT5G49970,AT1G78290,AT1G12580,AT3G07350,AT1G06750,ATCG00190,AT5G51290,AT1G4
GO:MF	carbohydrate derivative binding	GO:0097367	0.0186533	1.72924	2963	1630	281	21313	AT3G53750,AT1G13180,AT1G77840,AT1G29730,AT1G53750,AT1G50480,AT5G25440,AT1G20060,AT2G33210,AT1G70490,AT5G60860,AT1G62950,AT5G52640,AT1G70430,AT1G18070,AT5G49970,AT1G78290,AT1G12580,AT3G07350,AT1G06750,ATCG00190,AT5G51290,AT1G49300,AT5G58290,AT5G19990,AT2G2
GO:MF	purine nucleotide binding	GO:0017076	0.0204193	1.68996	2907	1630	276	21313	AT3G53750,AT1G13180,AT1G77840,AT1G29730,AT1G53750,AT1G50480,AT5G25440,AT1G20060,AT2G33210,AT1G70490,AT5G60860,AT1G62950,AT5G52640,AT1G70430,AT1G18070,AT1G78290,AT1G12580,AT3G07350,AT1G06750,AT5G51290,AT1G49300,AT5G58290,AT5G19990,AT2G20142,AT1G16030,AT5G0
GO:MF	ribonucleotide binding	GO:0032553	0.0225514	1.64683	2923	1630	277	21313	AT3G53750,AT1G13180,AT1G77840,AT1G29730,AT1G53750,AT1G50480,AT5G25440,AT1G20060,AT2G33210,AT1G70490,AT5G60860,AT1G62950,AT5G52640,AT1G70430,AT1G18070,AT5G49970,AT1G78290,AT1G12580,AT3G07350,AT1G06750,AT5G51290,AT1G49300,AT5G58290,AT5G19990,AT2G20142,AT1G1
GO:MF	purine ribonucleotide binding	GO:0032555	0.0272752	1.56423	2895	1630	274	21313	AT3G53750,AT1G13180,AT1G77840,AT1G29730,AT1G53750,AT1G50480,AT5G25440,AT1G20060,AT2G33210,AT1G70490,AT5G60860,AT1G62950,AT5G52640,AT1G70430,AT1G18070,AT1G78290,AT1G12580,AT3G07350,AT1G06750,AT5G51290,AT1G49300,AT5G58290,AT5G19990,AT2G20142,AT1G16030,AT5G0
GO:MF	ion binding	GO:0043167	0.0484459	1.31474	6691	1630	579	21313	AT2G04450,AT4G03190,AT3G53750,AT1G49200,AT1G13180,AT3G01830,AT5G18580,AT1G77840,AT1G49850,AT5G58860,AT5G51700,AT1G29730,AT1G53750,AT1G50480,AT5G25440,AT2G35380,AT3G27060,AT1G20060,AT2G33210,AT5G56340,AT1G70490,AT4G39120,AT5G60860,AT1G55790,AT1G22920,AT4G1
GO:MF	anion binding	GO:0043168	0.0485371	1.31393	3341	1630	309	21313	AT4G03190,AT3G53750,AT1G13180,AT1G77840,AT1G29730,AT1G53750,AT1G50480,AT5G25440,AT1G20060,AT2G33210,AT1G70490,AT5G60860,AT1G62950,AT5G52640,AT2G47590,AT1G70430,AT1G18070,AT5G49970,AT1G78290,AT1G12580,AT3G07350,AT1G06750,AT5G51290,AT1G49300,AT5G58290,AT5G1
GO:BP	response to chemical	GO:0042221	8.43071e-13	12.0741	3153	1730	351	23191	AT5G17310,AT2G04450,AT4G03190,AT1G73330,AT1G54060,AT2G44840,AT5G42980,AT2G02810,AT3G61190,AT1G50480,AT1G65390,AT2G22240,AT2G35380,AT3G57540,AT1G70490,AT5G58430,AT1G22920,AT2G35000,AT3G02840,AT3G16720,AT1G02860,AT5G45550,AT3G52930,AT4G14550,AT3G55970,AT1G8
GO:BP	response to chitin	GO:0010200	3.82937e-11	10.4169	138	1730	40	23191	AT2G44840,AT2G35000,AT3G16720,AT2G29065,AT2G37430,AT4G37610,AT4G23810,AT1G74410,AT3G52800,AT2G35930,AT5G51190,AT5G62020,AT1G04100,AT4G34410,AT1G32640,AT4G01250,AT2G46400,AT3G45640,AT3G05200,AT5G43170,AT2G33580,AT1G66160,AT3G46620,AT3G55980,AT3G53600,AT5G5
GO:BP	response to organic substance	GO:0010033	1.46734e-08	7.83347	2063	1730	235	23191	AT2G04450,AT4G03190,AT1G54060,AT2G44840,AT2G02810,AT3G61190,AT1G65390,AT2G22240,AT3G57540,AT5G58430,AT1G22920,AT2G35000,AT3G16720,AT1G02860,AT5G45550,AT4G14550,AT3G55970,AT1G80730,AT3G42800,AT5G35080,AT5G25190,AT2G29065,AT4G36780,AT2G37430,AT4G37610,AT5G0
GO:BP	response to stimulus	GO:0050896	1.98202e-08	7.70289	6465	1730	604	23191	AT5G17310,AT2G04450,AT4G03190,AT1G73330,AT1G04750,AT1G54060,AT2G44840,AT3G12040,AT5G42980,AT5G51700,AT2G02810,AT3G61190,AT1G50480,AT5G25440,AT1G65390,AT2G22240,AT2G35380,AT3G27060,AT3G57540,AT1G70490,AT5G58430,AT5G54170,AT1G22920,AT5G58500,AT2G35000,AT3G0
GO:BP	cellular response to chemical stimulus	GO:0070887	1.49928e-07	6.82412	1716	1730	199	23191	AT2G04450,AT4G03190,AT2G44840,AT2G02810,AT1G65390,AT2G35380,AT5G58430,AT5G45550,AT4G14550,AT3G55970,AT1G80730,AT3G42800,AT5G25190,AT1G21550,AT3G07350,AT1G76650,AT4G36780,AT2G37430,AT4G23810,AT1G09070,AT1G28370,AT1G16030,AT3G21640,AT3G52800,AT1G65690,AT2G3
GO:BP	cellular response to stimulus	GO:0051716	7.16587e-07	6.14473	3313	1730	336	23191	AT2G04450,AT4G03190,AT1G04750,AT2G44840,AT3G12040,AT5G51700,AT2G02810,AT1G65390,AT2G22240,AT2G35380,AT3G27060,AT5G58430,AT1G22920,AT1G02860,AT5G45550,AT5G52640,AT2G47590,AT4G14550,AT1G14750,AT3G55970,AT1G80730,AT5G38470,AT3G42800,AT5G35080,AT5G25190,AT1G2
GO:BP	cellular response to stress	GO:0033554	2.57905e-06	5.58854	1265	1730	152	23191	AT1G04750,AT3G12040,AT5G51700,AT2G02810,AT2G22240,AT3G27060,AT1G02860,AT5G52640,AT2G47590,AT1G14750,AT5G38470,AT5G35080,AT1G21550,AT3G07350,AT2G47470,AT1G76650,AT3G08970,AT5G26680,AT1G09070,AT5G22110,AT3G08040,AT1G16030,AT3G52800,AT1G19480,AT3G06190,AT1G1
GO:BP	response to organonitrogen compound	GO:0010243	5.51183e-06	5.2587	261	1730	48	23191	AT2G44840,AT2G35000,AT3G16720,AT5G35080,AT2G29065,AT2G37430,AT4G37610,AT4G23810,AT1G74410,AT3G52800,AT2G35930,AT5G51190,AT5G62020,AT1G04100,AT4G34410,AT1G32640,AT4G01250,AT2G46400,AT3G45640,AT3G05200,AT3G53230,AT5G43170,AT2G33580,AT1G66160,AT5G43710,AT2G3
GO:BP	cellular response to hypoxia	GO:0071456	7.79715e-06	5.10806	239	1730	45	23191	AT1G21550,AT3G07350,AT1G76650,AT1G09070,AT3G52800,AT5G45630,AT2G01180,AT4G01250,AT2G46400,AT5G57510,AT4G01360,AT1G07150,AT1G72900,AT1G76600,AT1G74310,AT2G40000,AT4G29780,AT3G55980,AT1G23710,AT4G27450,AT2G18670,AT1G73500,AT4G24570,AT1G27730,AT5G59820,AT1G1
GO:BP	cellular response to oxygen levels	GO:0071453	1.01821e-05	4.99216	241	1730	45	23191	AT1G21550,AT3G07350,AT1G76650,AT1G09070,AT3G52800,AT5G45630,AT2G01180,AT4G01250,AT2G46400,AT5G57510,AT4G01360,AT1G07150,AT1G72900,AT1G76600,AT1G74310,AT2G40000,AT4G29780,AT3G55980,AT1G23710,AT4G27450,AT2G18670,AT1G73500,AT4G24570,AT1G27730,AT5G59820,AT1G1
GO:BP	cellular response to decreased oxygen levels	GO:0036294	1.01821e-05	4.99216	241	1730	45	23191	AT1G21550,AT3G07350,AT1G76650,AT1G09070,AT3G52800,AT5G45630,AT2G01180,AT4G01250,AT2G46400,AT5G57510,AT4G01360,AT1G07150,AT1G72900,AT1G76600,AT1G74310,AT2G40000,AT4G29780,AT3G55980,AT1G23710,AT4G27450,AT2G18670,AT1G73500,AT4G24570,AT1G27730,AT5G59820,AT1G1
GO:BP	response to hypoxia	GO:0001666	7.0968e-05	4.14894	265	1730	46	23191	AT1G21550,AT3G07350,AT1G76650,AT1G09070,AT3G52800,AT5G45630,AT2G01180,AT4G01250,AT2G46400,AT5G57510,AT4G01360,AT1G07150,AT1G72900,AT1G76600,AT1G74310,AT2G40000,AT4G29780,AT3G55980,AT1G23710,AT4G27450,AT2G18670,AT1G73500,AT4G24570,AT1G27730,AT5G59820,AT2G3
GO:BP	response to decreased oxygen levels	GO:0036293	0.000112423	3.94915	269	1730	46	23191	AT1G21550,AT3G07350,AT1G76650,AT1G09070,AT3G52800,AT5G45630,AT2G01180,AT4G01250,AT2G46400,AT5G57510,AT4G01360,AT1G07150,AT1G72900,AT1G76600,AT1G74310,AT2G40000,AT4G29780,AT3G55980,AT1G23710,AT4G27450,AT2G18670,AT1G73500,AT4G24570,AT1G27730,AT5G59820,AT2G3
GO:BP	response to oxygen levels	GO:0070482	0.000125884	3.90003	270	1730	46	23191	AT1G21550,AT3G07350,AT1G76650,AT1G09070,AT3G52800,AT5G45630,AT2G01180,AT4G01250,AT2G46400,AT5G57510,AT4G01360,AT1G07150,AT1G72900,AT1G76600,AT1G74310,AT2G40000,AT4G29780,AT3G55980,AT1G23710,AT4G27450,AT2G18670,AT1G73500,AT4G24570,AT1G27730,AT5G59820,AT2G3
GO:BP	response to nitrogen compound	GO:1901698	0.000258251	3.58796	312	1730	50	23191	AT2G44840,AT2G35000,AT3G16720,AT1G02860,AT5G35080,AT2G29065,AT2G37430,AT4G37610,AT4G23810,AT1G74410,AT3G52800,AT2G35930,AT5G51190,AT5G62020,AT1G04100,AT4G34410,AT1G32640,AT4G01250,AT2G46400,AT3G45640,AT3G05200,AT3G53230,AT5G43170,AT2G33580,AT1G66160,AT5G4
GO:BP	cellular process	GO:0009987	0.000347996	3.45843	15804	1730	1271	23191	AT3G08620,AT5G17310,AT2G04450,AT4G03190,AT1G73330,AT3G22990,AT3G53750,AT1G61580,AT1G04750,AT2G15880,AT1G49200,AT1G13180,AT1G54060,AT2G44840,AT5G18580,AT5G20110,AT3G12040,AT1G54140,AT1G77840,AT5G42980,AT3G58060,AT1G49850,AT5G58860,AT5G51700,AT1G29730,AT4G2
GO:BP	response to endogenous stimulus	GO:0009719	0.000390285	3.40862	1624	1730	175	23191	AT4G03190,AT1G54060,AT2G44840,AT1G65390,AT2G22240,AT3G57540,AT5G58430,AT1G22920,AT5G45550,AT4G14550,AT3G55970,AT1G80730,AT3G42800,AT5G25190,AT4G36780,AT4G37610,AT5G07990,AT4G23810,AT1G28370,AT3G08040,AT3G21640,AT5G09810,AT5G67160,AT1G65690,AT2G39840,AT5G2
GO:BP	response to hormone	GO:0009725	0.000436638	3.35988	1593	1730	172	23191	AT4G03190,AT1G54060,AT2G44840,AT1G65390,AT2G22240,AT3G57540,AT5G58430,AT1G22920,AT5G45550,AT4G14550,AT3G55970,AT1G80730,AT3G42800,AT5G25190,AT4G36780,AT4G37610,AT5G07990,AT4G23810,AT1G28370,AT3G08040,AT3G21640,AT5G09810,AT5G67160,AT1G65690,AT2G39840,AT5G2
GO:BP	response to abiotic stimulus	GO:0009628	0.000484377	3.31482	2214	1730	226	23191	AT1G73330,AT5G42980,AT3G61190,AT3G57540,AT5G58430,AT1G22920,AT5G58500,AT5G49480,AT5G52640,AT3G52930,AT1G80730,AT5G38470,AT1G31350,AT5G35080,AT1G21550,AT1G78290,AT3G07350,AT1G76650,AT4G37610,AT3G08970,AT2G27820,AT1G49300,AT5G05270,AT5G51820,AT1G09070,AT3G6
GO:BP	response to stress	GO:0006950	0.000805561	3.0939	3906	1730	366	23191	AT4G03190,AT1G73330,AT1G04750,AT2G44840,AT3G12040,AT5G42980,AT5G51700,AT2G02810,AT3G61190,AT5G25440,AT1G65390,AT2G22240,AT2G35380,AT3G27060,AT3G57540,AT5G58430,AT5G54170,AT1G22920,AT2G35000,AT3G02840,AT3G16720,AT1G02860,AT5G49480,AT5G52640,AT5G50440,AT2G4
GO:BP	response to oxygen-containing compound	GO:1901700	0.000916764	3.03774	1691	1730	179	23191	AT2G04450,AT1G73330,AT2G44840,AT3G61190,AT1G65390,AT3G57540,AT5G58430,AT2G35000,AT3G02840,AT3G16720,AT1G02860,AT3G55970,AT1G80730,AT2G29065,AT4G36780,AT2G37430,AT4G37610,AT4G23810,AT1G74410,AT3G08040,AT3G52800,AT5G67160,AT1G65690,AT2G39840,AT5G26230,AT1G0
GO:BP	cellular macromolecule metabolic process	GO:0044260	0.00125289	2.90209	7636	1730	660	23191	AT5G17310,AT4G03190,AT1G73330,AT3G22990,AT1G61580,AT1G49200,AT1G54060,AT2G44840,AT3G12040,AT1G54140,AT1G77840,AT1G49850,AT1G29730,AT1G53750,AT5G25440,AT1G72010,AT1G62990,AT3G27060,AT5G56340,AT4G09680,AT1G55790,AT1G22920,AT5G39740,AT5G58500,AT2G22475,AT5G1
GO:BP	cellular response to organic substance	GO:0071310	0.00307424	2.51226	1182	1730	131	23191	AT2G04450,AT4G03190,AT2G44840,AT2G02810,AT1G65390,AT5G58430,AT5G45550,AT4G14550,AT3G55970,AT1G80730,AT3G42800,AT5G25190,AT4G36780,AT4G23810,AT1G28370,AT1G16030,AT3G21640,AT1G65690,AT2G39840,AT5G26230,AT4G32040,AT1G19180,AT5G51190,AT1G19210,AT4G37580,AT1G0
GO:BP	response to inorganic substance	GO:0010035	0.00814643	2.08903	962	1730	109	23191	AT5G17310,AT1G73330,AT1G50480,AT3G57540,AT1G70490,AT5G58430,AT3G02840,AT1G02860,AT3G52930,AT2G47470,AT2G37430,AT4G37610,AT4G23810,AT1G27130,AT1G08810,AT3G06190,AT2G35930,AT3G01860,AT5G65020,AT5G64960,AT5G01600,AT1G68820,AT1G69270,AT5G12420,AT3G60750,AT3G2
GO:BP	macromolecule metabolic process	GO:0043170	0.010086	1.99628	9198	1730	771	23191	AT3G08620,AT5G17310,AT4G03190,AT1G73330,AT3G22990,AT1G61580,AT1G49200,AT1G54060,AT2G44840,AT3G12040,AT1G54140,AT1G77840,AT1G49850,AT1G29730,AT1G53750,AT4G00740,AT5G25440,AT1G72010,AT1G62990,AT1G15000,AT3G27060,AT5G44530,AT5G56340,AT4G09680,AT1G55790,AT1G2
GO:BP	shoot system development	GO:0048367	0.0146853	1.83312	964	1730	108	23191	AT3G22990,AT1G54060,AT1G22920,AT5G39740,AT5G16310,AT3G25520,AT4G23810,AT3G21640,AT1G13870,AT1G19180,AT5G64960,AT5G37260,AT5G01600,AT5G16320,AT2G37250,AT1G65470,AT2G40080,AT1G05180,AT4G01250,AT4G29040,AT1G75640,AT3G07970,AT3G55510,AT3G45640,AT1G70560,AT3G0
GO:BP	defense response to bacterium	GO:0042742	0.0150606	1.82216	457	1730	60	23191	AT5G51700,AT5G25440,AT2G22240,AT5G58430,AT1G02860,AT5G52640,AT4G23810,AT5G67160,AT1G19180,AT4G39950,AT2G27080,AT2G46400,AT1G70560,AT5G22250,AT1G26190,AT3G05200,AT1G13440,AT2G23810,AT2G43690,AT3G48880,AT1G31770,AT5G24400,AT4G22330,AT4G22305,AT2G40000,AT1G3
GO:BP	multicellular organism development	GO:0007275	0.0177147	1.75167	2833	1730	268	23191	AT5G17310,AT4G03190,AT3G22990,AT3G53750,AT1G13180,AT1G54060,AT3G58060,AT2G02810,AT1G62990,AT2G22240,AT3G27060,AT1G22920,AT5G39740,AT5G58500,AT2G22475,AT5G16310,AT4G14220,AT4G24310,AT4G13940,AT5G45550,AT2G46660,AT3G25520,AT4G14550,AT1G80730,AT5G60690,AT2G4
GO:BP	response to bacterium	GO:0009617	0.0217332	1.66288	534	1730	67	23191	AT5G51700,AT5G25440,AT2G22240,AT5G58430,AT1G02860,AT5G52640,AT4G23810,AT5G67160,AT1G19180,AT5G01600,AT4G39950,AT2G27080,AT2G46400,AT3G45640,AT1G70560,AT5G22250,AT3G12580,AT1G26190,AT3G05200,AT1G13440,AT1G20510,AT2G23810,AT2G43690,AT3G48880,AT1G31770,AT5G2
GO:BP	cellular response to endogenous stimulus	GO:0071495	0.024501	1.61082	1031	1730	113	23191	AT4G03190,AT2G44840,AT1G65390,AT5G58430,AT5G45550,AT4G14550,AT3G55970,AT1G80730,AT3G42800,AT5G25190,AT4G36780,AT4G23810,AT1G28370,AT3G21640,AT1G65690,AT2G39840,AT5G26230,AT4G32040,AT1G19180,AT5G51190,AT1G19210,AT4G37580,AT1G04100,AT1G69270,AT5G17300,AT5G3
GO:BP	cellular response to hormone stimulus	GO:0032870	0.0258618	1.58734	999	1730	110	23191	AT4G03190,AT2G44840,AT1G65390,AT5G58430,AT5G45550,AT4G14550,AT3G55970,AT1G80730,AT3G42800,AT5G25190,AT4G36780,AT4G23810,AT1G28370,AT3G21640,AT1G65690,AT2G39840,AT5G26230,AT4G32040,AT1G19180,AT5G51190,AT1G19210,AT4G37580,AT1G04100,AT1G69270,AT5G17300,AT5G3
GO:BP	response to auxin	GO:0009733	0.025978	1.58539	415	1730	55	23191	AT4G03190,AT1G54060,AT2G22240,AT1G22920,AT5G45550,AT4G14550,AT3G42800,AT4G37610,AT5G07990,AT3G21640,AT5G09810,AT1G08810,AT4G37580,AT1G04100,AT5G17300,AT4G14740,AT4G34410,AT2G47170,AT1G05180,AT5G42190,AT5G22220,AT1G30330,AT1G64625,AT1G19850,AT1G77850,AT5G5
GO:BP	system development	GO:0048731	0.0284943	1.54524	2013	1730	198	23191	AT3G22990,AT3G53750,AT1G54060,AT3G58060,AT1G62990,AT2G22240,AT1G22920,AT5G39740,AT2G22475,AT5G16310,AT4G24310,AT4G13940,AT5G45550,AT2G46660,AT3G25520,AT4G14550,AT2G47470,AT2G37430,AT4G23810,AT2G33790,AT5G22110,AT3G61140,AT3G21640,AT5G09810,AT1G13870,AT5G1
GO:BP	anatomical structure development	GO:0048856	0.0400929	1.39693	3207	1730	296	23191	AT5G17310,AT4G03190,AT3G22990,AT3G53750,AT1G13180,AT1G54060,AT5G18580,AT3G58060,AT2G02810,AT1G62990,AT2G22240,AT3G27060,AT1G22920,AT5G39740,AT5G58500,AT2G22475,AT5G16310,AT4G14220,AT4G24310,AT4G13940,AT5G45550,AT2G46660,AT3G25520,AT4G14550,AT1G80730,AT5G6
GO:BP	hormone-mediated signaling pathway	GO:0009755	0.0421357	1.37535	944	1730	104	23191	AT4G03190,AT2G44840,AT1G65390,AT5G58430,AT5G45550,AT4G14550,AT3G55970,AT1G80730,AT3G42800,AT5G25190,AT4G36780,AT4G23810,AT1G28370,AT3G21640,AT1G65690,AT2G39840,AT5G26230,AT1G19180,AT5G51190,AT1G19210,AT4G37580,AT1G04100,AT1G69270,AT5G17300,AT5G37740,AT4G1
GO:BP	post-embryonic development	GO:0009791	0.0454402	1.34256	1606	1730	162	23191	AT3G22990,AT1G54060,AT3G58060,AT1G62990,AT2G22240,AT1G22920,AT4G13940,AT2G46660,AT4G14550,AT1G80730,AT2G47470,AT2G33790,AT5G22110,AT3G61140,AT5G09810,AT5G16750,AT2G35720,AT1G19180,AT2G34900,AT4G37580,AT5G64960,AT5G37260,AT5G01600,AT3G49660,AT1G69270,AT2G0
GO:BP	developmental process	GO:0032502	0.046334	1.3341	3336	1730	306	23191	AT5G17310,AT4G03190,AT3G22990,AT3G53750,AT1G13180,AT1G54060,AT5G18580,AT3G58060,AT2G02810,AT1G62990,AT2G22240,AT3G27060,AT1G22920,AT5G39740,AT5G58500,AT2G22475,AT5G16310,AT4G14220,AT4G24310,AT4G13940,AT5G45550,AT2G46660,AT3G25520,AT4G14550,AT1G80730,AT5G6
GO:BP	protein metabolic process	GO:0019538	0.047828	1.32032	4808	1730	424	23191	AT4G03190,AT1G73330,AT1G61580,AT1G49200,AT1G54140,AT1G77840,AT1G49850,AT1G29730,AT1G53750,AT5G25440,AT1G15000,AT5G44530,AT5G56340,AT1G22920,AT5G39740,AT2G22475,AT5G16310,AT4G14220,AT5G53140,AT2G35000,AT3G16720,AT3G20800,AT1G02860,AT1G62950,AT3G53120,AT4G3
GO:CC	plasma membrane	GO:0005886	1.37513e-05	4.86166	3465	1604	344	20918	AT5G17310,AT3G53750,AT1G04750,AT5G42980,AT1G29730,AT4G21450,AT1G53750,AT1G50480,AT5G25440,AT3G57540,AT2G33210,AT1G70490,AT5G58430,AT5G60860,AT5G39740,AT2G38480,AT2G34960,AT3G49220,AT1G02860,AT4G13940,AT5G45550,AT5G52640,AT5G60710,AT3G25520,AT3G52930,AT1G5
GO:CC	intracellular anatomical structure	GO:0005622	4.36766e-05	4.35975	14657	1604	1212	20918	AT3G08620,AT5G17310,AT3G47850,AT2G04450,AT4G03190,AT3G22990,AT3G53750,AT1G61580,AT1G04750,AT1G13180,AT1G54060,AT2G44840,AT5G18580,AT5G20110,AT3G12040,AT1G54140,ATMG00770,AT1G77840,AT5G42980,AT3G58060,AT5G58860,AT4G16650,AT4G19645,AT5G51700,AT4G21450,AT2G0
GO:CC	cell periphery	GO:0071944	6.96225e-05	4.15725	4164	1604	398	20918	AT5G17310,AT3G53750,AT1G04750,AT2G15880,AT5G42980,AT1G29730,AT4G21450,AT1G53750,AT1G50480,AT5G25440,AT3G57540,AT2G33210,AT1G70490,AT5G58430,AT5G60860,AT5G39740,AT2G38480,AT2G34960,AT3G49220,AT1G02860,AT4G13940,AT5G45550,AT5G52640,AT5G60710,AT3G25520,AT3G5
GO:CC	intracellular organelle	GO:0043229	0.000162739	3.78851	13107	1604	1094	20918	AT3G08620,AT5G17310,AT3G47850,AT4G03190,AT3G22990,AT3G53750,AT1G61580,AT1G04750,AT1G13180,AT1G54060,AT2G44840,AT5G18580,AT5G20110,AT3G12040,AT1G54140,ATMG00770,AT1G77840,AT5G42980,AT3G58060,AT5G58860,AT4G16650,AT4G19645,AT5G51700,AT4G21450,AT2G02810,AT1G5
GO:CC	intracellular membrane-bounded organelle	GO:0043231	0.00039937	3.39862	12641	1604	1056	20918	AT3G08620,AT5G17310,AT3G47850,AT4G03190,AT3G22990,AT3G53750,AT1G61580,AT1G04750,AT1G54060,AT2G44840,AT5G18580,AT3G12040,AT1G54140,ATMG00770,AT1G77840,AT5G42980,AT3G58060,AT5G58860,AT4G16650,AT4G19645,AT5G51700,AT4G21450,AT2G02810,AT1G53750,AT1G50480,AT4G0
GO:CC	organelle	GO:0043226	0.000490688	3.30919	13176	1604	1095	20918	AT3G08620,AT5G17310,AT3G47850,AT4G03190,AT3G22990,AT3G53750,AT1G61580,AT1G04750,AT1G13180,AT1G54060,AT2G44840,AT5G18580,AT5G20110,AT3G12040,AT1G54140,ATMG00770,AT1G77840,AT5G42980,AT3G58060,AT5G58860,AT4G16650,AT4G19645,AT5G51700,AT4G21450,AT2G02810,AT1G5
GO:CC	cytoplasm	GO:0005737	0.000692902	3.15933	10839	1604	918	20918	AT5G17310,AT3G47850,AT2G04450,AT3G53750,AT1G61580,AT1G04750,AT1G13180,AT5G18580,AT5G20110,ATMG00770,AT1G77840,AT5G42980,AT3G58060,AT5G58860,AT4G16650,AT4G19645,AT5G51700,AT4G21450,AT2G02810,AT1G53750,AT1G50480,AT4G00740,AT5G25440,AT1G65390,AT1G15000,AT2G2
GO:CC	membrane-bounded organelle	GO:0043227	0.00116203	2.93478	12724	1604	1058	20918	AT3G08620,AT5G17310,AT3G47850,AT4G03190,AT3G22990,AT3G53750,AT1G61580,AT1G04750,AT1G54060,AT2G44840,AT5G18580,AT3G12040,AT1G54140,ATMG00770,AT1G77840,AT5G42980,AT3G58060,AT5G58860,AT4G16650,AT4G19645,AT5G51700,AT4G21450,AT2G02810,AT1G53750,AT1G50480,AT4G0
GO:CC	vacuole	GO:0005773	0.00485561	2.31376	1247	1604	135	20918	AT5G42980,AT3G58060,AT5G58860,AT1G15000,AT2G35380,AT2G33210,AT2G25610,AT1G70490,AT5G39740,AT2G22475,AT4G13940,AT5G45550,AT1G55190,AT1G18070,AT3G25520,AT3G52930,AT3G61180,AT1G32410,AT2G04690,AT2G47470,AT1G49300,AT1G69840,AT1G09070,AT3G21640,AT4G14960,AT5G0
GO:CC	endosome	GO:0005768	0.0114014	1.94304	477	1604	61	20918	AT1G04750,AT4G16650,AT4G00740,AT5G60860,AT5G45550,AT5G50440,AT3G53120,AT1G55190,AT1G32410,AT2G21120,AT4G27690,AT3G23870,AT4G18430,AT2G38360,AT5G45130,AT2G47170,AT2G43290,AT2G06530,AT5G13860,AT1G16020,AT5G39510,AT2G25520,AT3G25140,AT5G25265,AT3G26370,AT2G2
GO:CC	bounding membrane of organelle	GO:0098588	0.0128912	1.88971	1453	1604	151	20918	AT1G04750,AT3G58060,AT2G02810,AT4G00740,AT2G33210,AT2G25610,AT4G13940,AT1G47750,AT5G45550,AT5G50440,AT3G53120,AT1G55190,AT3G52930,AT3G61180,AT1G32410,AT1G27120,AT2G47470,AT1G49300,AT1G69840,AT1G09070,AT3G21640,AT5G07090,AT5G62740,AT1G12760,AT4G27690,AT1G6
GO:CC	endomembrane system	GO:0012505	0.0281552	1.55044	2561	1604	244	20918	AT3G53750,AT1G04750,AT5G42980,AT4G16650,AT4G19645,AT4G21450,AT2G02810,AT4G00740,AT1G65390,AT2G33210,AT2G25610,AT1G70490,AT5G58430,AT5G60860,AT4G24310,AT5G45550,AT5G50440,AT3G53120,AT1G55190,AT1G32410,AT1G27120,AT3G23175,AT5G35080,AT2G47470,AT2G33845,AT5G6
GO:CC	cellular anatomical entity	GO:0110165	0.0283139	1.548	20064	1604	1565	20918	AT3G08620,AT5G17310,AT3G47850,AT2G04450,AT4G03190,AT3G22990,AT3G53750,AT1G61580,AT1G04750,AT5G08240,AT2G15880,AT1G49200,AT3G47510,AT1G13180,AT1G54060,AT2G44840,AT1G03070,AT5G18580,AT5G20110,AT3G12040,AT1G54140,ATMG00770,AT1G77840,AT5G42980,AT3G58060,AT5G5
GO:CC	nucleus	GO:0005634	0.044335	1.35325	6208	1604	539	20918	AT3G08620,AT4G03190,AT3G22990,AT3G53750,AT1G61580,AT1G54060,AT2G44840,AT5G18580,AT3G12040,AT1G54140,AT1G77840,AT5G51700,AT1G53750,AT1G50480,AT5G25440,AT1G72010,AT1G65390,AT1G62990,AT2G30910,AT3G27060,AT1G20060,AT1G70490,AT4G09680,AT1G22920,AT5G39740,AT5G5

## Sheet: lightblue4
File S1c: functional enrichment of the genes from the lightblue4 module of A. thaliana
source	term_name	term_id	adjusted_p_value	negative_log10_of_adjusted_p_value	term_size	query_size	intersection_size	effective_domain_size	intersections
GO:MF	catalytic activity	GO:0003824	1.26534e-18	17.8978	9572	3203	1558	23336	AT1G01190,AT1G01580,AT1G01610,AT1G01650,AT1G01660,AT1G01900,AT1G01910,AT1G02205,AT1G02300,AT1G02500,AT1G02660,AT1G02730,AT1G02850,AT1G02860,AT1G02920,AT1G02950,AT1G03630,AT1G03680,AT1G03850,AT1G03920,AT1G04040,AT1G04050,AT1G04170,AT1G04180,AT1G04350,AT1G04610,AT1G04680,AT1G04700,AT1G04980,AT1G04990,AT1G05240,AT1G05260,AT1G05310,AT1G05440,AT1G05560,AT1G05590,AT1G05630,AT1G05675,AT1G05680,AT1G06080…
GO:MF	ion binding	GO:0043167	3.90875e-13	12.408	6552	3203	1090	23336	AT1G01190,AT1G01340,AT1G01350,AT1G01580,AT1G01910,AT1G02205,AT1G02335,AT1G02500,AT1G02860,AT1G02920,AT1G02950,AT1G03680,AT1G03850,AT1G03920,AT1G04020,AT1G04050,AT1G04170,AT1G04180,AT1G04350,AT1G04400,AT1G04610,AT1G04680,AT1G04700,AT1G04820,AT1G04990,AT1G05240,AT1G05260,AT1G05500,AT1G05630,AT1G05990,AT1G06080,AT1G06330,AT1G06430,AT1G06450,AT1G06570,AT1G06650,AT1G06680,AT1G06830,AT1G06840,AT1G07560…
GO:MF	microtubule binding	GO:0008017	6.92756e-10	9.15942	177	3203	61	23336	AT1G09170,AT1G11160,AT1G18370,AT1G18550,AT1G19835,AT1G23790,AT1G27210,AT1G50890,AT1G53140,AT1G72250,AT1G73860,AT1G80350,AT2G07170,AT2G22610,AT2G28620,AT2G36200,AT2G37420,AT2G47500,AT3G04630,AT3G05330,AT3G09980,AT3G10310,AT3G19050,AT3G20150,AT3G23090,AT3G23670,AT3G44050,AT3G45850,AT3G47690,AT3G53180,AT3G60190,AT3G60840,AT4G13370,AT4G14150,AT4G14330,AT4G17220,AT4G18570,AT4G21270,AT4G22860,AT4G24170…
GO:MF	protein domain specific binding	GO:0019904	2.01532e-09	8.69566	68	3203	33	23336	AT1G03130,AT1G06680,AT1G15820,AT1G20340,AT1G29930,AT1G31330,AT1G32060,AT1G44575,AT1G51400,AT1G61520,AT2G05100,AT2G06520,AT2G20260,AT2G26500,AT2G34420,AT2G46820,AT3G02730,AT3G26650,AT3G47470,AT3G54890,AT3G56240,AT3G61470,AT4G02520,AT4G02770,AT4G10340,AT4G12800,AT4G25100,AT4G28750,AT4G32260,AT5G01530,AT5G38410,AT5G54270,AT5G64040
GO:MF	tubulin binding	GO:0015631	3.08746e-09	8.5104	187	3203	62	23336	AT1G09170,AT1G11160,AT1G18370,AT1G18550,AT1G19835,AT1G23790,AT1G27210,AT1G50890,AT1G53140,AT1G72250,AT1G73860,AT1G80350,AT2G07170,AT2G22610,AT2G28620,AT2G30410,AT2G36200,AT2G37420,AT2G47500,AT3G04630,AT3G05330,AT3G09980,AT3G10310,AT3G19050,AT3G20150,AT3G23090,AT3G23670,AT3G44050,AT3G45850,AT3G47690,AT3G53180,AT3G60190,AT3G60840,AT4G13370,AT4G14150,AT4G14330,AT4G17220,AT4G18570,AT4G21270,AT4G22860…
GO:MF	protein kinase activity	GO:0004672	1.29822e-08	7.88665	1111	3203	230	23336	AT1G03920,AT1G04700,AT1G06840,AT1G07560,AT1G08590,AT1G08650,AT1G09000,AT1G09450,AT1G09970,AT1G10940,AT1G11050,AT1G11130,AT1G11330,AT1G15530,AT1G16130,AT1G16440,AT1G17750,AT1G18390,AT1G18890,AT1G20930,AT1G21210,AT1G21270,AT1G23540,AT1G26970,AT1G29230,AT1G49580,AT1G52290,AT1G52310,AT1G53430,AT1G53440,AT1G53700,AT1G53730,AT1G56145,AT1G59580,AT1G61360,AT1G61380,AT1G61590,AT1G61860,AT1G61950,AT1G66340…
GO:MF	peroxidase activity	GO:0004601	2.23147e-08	7.65141	137	3203	49	23336	AT1G05240,AT1G05260,AT1G09090,AT1G20630,AT1G30870,AT1G34510,AT1G44970,AT1G64060,AT1G65970,AT1G68850,AT1G71695,AT1G73680,AT1G77490,AT1G78380,AT2G18980,AT2G38380,AT2G38390,AT2G39040,AT2G48150,AT3G01190,AT3G26060,AT3G28200,AT3G29200,AT3G32980,AT3G49960,AT4G02520,AT4G11290,AT4G16270,AT4G21960,AT4G25090,AT4G26010,AT4G30170,AT4G31870,AT4G37520,AT5G14130,AT5G15180,AT5G17820,AT5G22410,AT5G24070,AT5G34850…
GO:MF	small molecule binding	GO:0036094	5.23729e-08	7.28089	3360	3203	581	23336	AT1G01340,AT1G01910,AT1G02500,AT1G03680,AT1G03920,AT1G04170,AT1G04180,AT1G04400,AT1G04610,AT1G04700,AT1G04820,AT1G06430,AT1G06680,AT1G06840,AT1G07560,AT1G08590,AT1G08650,AT1G09000,AT1G09080,AT1G09170,AT1G09450,AT1G09750,AT1G09970,AT1G10670,AT1G10760,AT1G10940,AT1G11050,AT1G11130,AT1G11330,AT1G12000,AT1G12010,AT1G12820,AT1G13210,AT1G14185,AT1G14230,AT1G14240,AT1G14460,AT1G15210,AT1G15530,AT1G16130…
GO:MF	antioxidant activity	GO:0016209	6.01133e-08	7.22103	167	3203	55	23336	AT1G05240,AT1G05260,AT1G08830,AT1G09090,AT1G20630,AT1G30870,AT1G34510,AT1G44970,AT1G64060,AT1G65970,AT1G68850,AT1G71695,AT1G73680,AT1G77490,AT1G78380,AT2G18980,AT2G28190,AT2G38380,AT2G38390,AT2G39040,AT2G48150,AT3G01190,AT3G26060,AT3G28200,AT3G29200,AT3G32980,AT3G49960,AT4G02520,AT4G11290,AT4G16270,AT4G21960,AT4G25090,AT4G25100,AT4G26010,AT4G30170,AT4G31870,AT4G37520,AT5G03880,AT5G14130,AT5G15180…
GO:MF	protein serine/threonine/tyrosine kinase activity	GO:0004712	1.06678e-07	6.97192	678	3203	152	23336	AT1G04700,AT1G06840,AT1G07560,AT1G08590,AT1G08650,AT1G09000,AT1G09450,AT1G09970,AT1G10940,AT1G11050,AT1G11330,AT1G15530,AT1G16130,AT1G16440,AT1G17750,AT1G18890,AT1G20930,AT1G21210,AT1G21270,AT1G23540,AT1G26970,AT1G29230,AT1G49580,AT1G52290,AT1G52310,AT1G53430,AT1G53440,AT1G53700,AT1G59580,AT1G61360,AT1G61380,AT1G61590,AT1G61950,AT1G66920,AT1G68400,AT1G68690,AT1G70460,AT1G70530,AT1G71830,AT1G73500…
GO:MF	oxidoreductase activity, acting on peroxide as acceptor	GO:0016684	1.24963e-07	6.90322	143	3203	49	23336	AT1G05240,AT1G05260,AT1G09090,AT1G20630,AT1G30870,AT1G34510,AT1G44970,AT1G64060,AT1G65970,AT1G68850,AT1G71695,AT1G73680,AT1G77490,AT1G78380,AT2G18980,AT2G38380,AT2G38390,AT2G39040,AT2G48150,AT3G01190,AT3G26060,AT3G28200,AT3G29200,AT3G32980,AT3G49960,AT4G02520,AT4G11290,AT4G16270,AT4G21960,AT4G25090,AT4G26010,AT4G30170,AT4G31870,AT4G37520,AT5G14130,AT5G15180,AT5G17820,AT5G22410,AT5G24070,AT5G34850…
GO:MF	tetrapyrrole binding	GO:0046906	1.44243e-07	6.8409	421	3203	105	23336	AT1G01190,AT1G05240,AT1G05260,AT1G12740,AT1G13080,AT1G13110,AT1G15820,AT1G20630,AT1G29930,AT1G30870,AT1G33730,AT1G34510,AT1G44575,AT1G44970,AT1G61520,AT1G64900,AT1G64950,AT1G67110,AT1G68850,AT1G71695,AT1G73680,AT1G77490,AT2G05070,AT2G05100,AT2G14100,AT2G16060,AT2G18980,AT2G23180,AT2G25160,AT2G32720,AT2G34420,AT2G38380,AT2G38390,AT2G39040,AT2G40000,AT2G42850,AT2G45970,AT2G46950,AT3G01190,AT3G03890…
GO:MF	microtubule motor activity	GO:0003777	1.89241e-07	6.72298	63	3203	29	23336	AT1G09170,AT1G18370,AT1G18550,AT1G72250,AT1G73860,AT2G22610,AT2G28620,AT2G36200,AT2G37420,AT2G47500,AT3G10310,AT3G19050,AT3G20150,AT3G23670,AT3G44050,AT3G45850,AT4G14150,AT4G14330,AT4G21270,AT4G24170,AT4G26660,AT4G27180,AT4G38950,AT5G02370,AT5G23910,AT5G27000,AT5G55520,AT5G60930,AT5G66310
GO:MF	oxidoreductase activity	GO:0016491	2.10769e-07	6.67619	1598	3203	304	23336	AT1G01190,AT1G01580,AT1G02205,AT1G03630,AT1G03680,AT1G03850,AT1G04180,AT1G04350,AT1G04610,AT1G05240,AT1G05260,AT1G06080,AT1G06570,AT1G06650,AT1G06830,AT1G08500,AT1G08830,AT1G09090,AT1G09500,AT1G10810,AT1G12010,AT1G12740,AT1G13080,AT1G13110,AT1G14120,AT1G14185,AT1G18140,AT1G18180,AT1G19900,AT1G20340,AT1G20630,AT1G23020,AT1G24340,AT1G26570,AT1G30720,AT1G30730,AT1G30870,AT1G31230,AT1G31710,AT1G32100…
GO:MF	cytoskeletal protein binding	GO:0008092	2.41118e-07	6.61777	335	3203	88	23336	AT1G01750,AT1G09170,AT1G11160,AT1G18370,AT1G18550,AT1G19835,AT1G20450,AT1G23790,AT1G27210,AT1G30050,AT1G50890,AT1G53140,AT1G54385,AT1G72250,AT1G73860,AT1G74830,AT1G80350,AT2G07170,AT2G16700,AT2G19760,AT2G22610,AT2G28620,AT2G29890,AT2G30410,AT2G31900,AT2G34150,AT2G36200,AT2G37420,AT2G39900,AT2G40820,AT2G41740,AT2G47500,AT3G04630,AT3G05330,AT3G05470,AT3G09980,AT3G10310,AT3G17680,AT3G19050,AT3G20150…
GO:MF	anion binding	GO:0043168	3.36371e-07	6.47318	3272	3203	562	23336	AT1G01340,AT1G01910,AT1G02500,AT1G02920,AT1G02950,AT1G03680,AT1G03920,AT1G04170,AT1G04180,AT1G04400,AT1G04610,AT1G04700,AT1G04820,AT1G06430,AT1G06680,AT1G06840,AT1G07560,AT1G08590,AT1G08650,AT1G09000,AT1G09080,AT1G09170,AT1G09450,AT1G09970,AT1G10670,AT1G10760,AT1G10940,AT1G11050,AT1G11130,AT1G11330,AT1G12000,AT1G12010,AT1G12820,AT1G13210,AT1G14185,AT1G14230,AT1G14240,AT1G14460,AT1G15210,AT1G15530…
GO:MF	protein serine kinase activity	GO:0106310	3.93085e-07	6.40551	633	3203	142	23336	AT1G06840,AT1G07560,AT1G08590,AT1G08650,AT1G09000,AT1G09450,AT1G09970,AT1G10940,AT1G11050,AT1G11330,AT1G15530,AT1G16130,AT1G16440,AT1G17750,AT1G18890,AT1G20930,AT1G21210,AT1G21270,AT1G23540,AT1G26970,AT1G29230,AT1G49580,AT1G52290,AT1G53430,AT1G53440,AT1G53700,AT1G59580,AT1G61360,AT1G61380,AT1G61590,AT1G61950,AT1G66920,AT1G68400,AT1G68690,AT1G70460,AT1G70530,AT1G71830,AT1G73500,AT1G76540,AT1G80640…
GO:MF	nucleotide binding	GO:0000166	6.02502e-07	6.22004	3145	3203	541	23336	AT1G01340,AT1G01910,AT1G02500,AT1G03920,AT1G04170,AT1G04180,AT1G04400,AT1G04610,AT1G04700,AT1G04820,AT1G06430,AT1G06840,AT1G07560,AT1G08590,AT1G08650,AT1G09000,AT1G09080,AT1G09170,AT1G09450,AT1G09750,AT1G09970,AT1G10670,AT1G10760,AT1G10940,AT1G11050,AT1G11130,AT1G11330,AT1G12000,AT1G13210,AT1G14185,AT1G14230,AT1G14240,AT1G14460,AT1G15210,AT1G15530,AT1G16130,AT1G16280,AT1G16390,AT1G16440,AT1G17470…
GO:MF	nucleoside phosphate binding	GO:1901265	6.02502e-07	6.22004	3145	3203	541	23336	AT1G01340,AT1G01910,AT1G02500,AT1G03920,AT1G04170,AT1G04180,AT1G04400,AT1G04610,AT1G04700,AT1G04820,AT1G06430,AT1G06840,AT1G07560,AT1G08590,AT1G08650,AT1G09000,AT1G09080,AT1G09170,AT1G09450,AT1G09750,AT1G09970,AT1G10670,AT1G10760,AT1G10940,AT1G11050,AT1G11130,AT1G11330,AT1G12000,AT1G13210,AT1G14185,AT1G14230,AT1G14240,AT1G14460,AT1G15210,AT1G15530,AT1G16130,AT1G16280,AT1G16390,AT1G16440,AT1G17470…
GO:MF	phosphotransferase activity, alcohol group as acceptor	GO:0016773	7.38166e-07	6.13185	1275	3203	249	23336	AT1G03920,AT1G04700,AT1G06840,AT1G07560,AT1G08590,AT1G08650,AT1G09000,AT1G09450,AT1G09970,AT1G10940,AT1G11050,AT1G11130,AT1G11330,AT1G12000,AT1G15530,AT1G16130,AT1G16440,AT1G17750,AT1G18390,AT1G18890,AT1G20930,AT1G20950,AT1G21210,AT1G21270,AT1G23540,AT1G26270,AT1G26970,AT1G29230,AT1G32060,AT1G49580,AT1G52290,AT1G52310,AT1G53430,AT1G53440,AT1G53700,AT1G53730,AT1G56145,AT1G59171,AT1G59580,AT1G60890…
GO:MF	protein serine/threonine kinase activity	GO:0004674	2.13588e-06	5.67042	865	3203	179	23336	AT1G03920,AT1G04700,AT1G06840,AT1G07560,AT1G08590,AT1G08650,AT1G09000,AT1G09450,AT1G09970,AT1G10940,AT1G11050,AT1G11330,AT1G15530,AT1G16130,AT1G16440,AT1G17750,AT1G18890,AT1G20930,AT1G21210,AT1G21270,AT1G23540,AT1G26970,AT1G29230,AT1G49580,AT1G52290,AT1G53430,AT1G53440,AT1G53700,AT1G56145,AT1G59580,AT1G61360,AT1G61380,AT1G61590,AT1G61860,AT1G61950,AT1G66920,AT1G68400,AT1G68690,AT1G70460,AT1G70530…
GO:MF	ATP binding	GO:0005524	6.6702e-06	5.17586	2411	3203	422	23336	AT1G01910,AT1G02500,AT1G03920,AT1G04400,AT1G04700,AT1G06430,AT1G06840,AT1G07560,AT1G08590,AT1G08650,AT1G09000,AT1G09080,AT1G09170,AT1G09450,AT1G09970,AT1G10670,AT1G10760,AT1G10940,AT1G11050,AT1G11130,AT1G11330,AT1G12000,AT1G13210,AT1G14230,AT1G14240,AT1G14460,AT1G15210,AT1G15530,AT1G16130,AT1G16280,AT1G16390,AT1G16440,AT1G17750,AT1G18370,AT1G18390,AT1G18550,AT1G18890,AT1G20750,AT1G20930,AT1G20950…
GO:MF	kinase activity	GO:0016301	8.7252e-06	5.05922	1472	3203	275	23336	AT1G03920,AT1G04700,AT1G06840,AT1G07560,AT1G08590,AT1G08650,AT1G09000,AT1G09450,AT1G09970,AT1G10760,AT1G10940,AT1G11050,AT1G11130,AT1G11330,AT1G12000,AT1G12330,AT1G15530,AT1G16130,AT1G16440,AT1G17750,AT1G18390,AT1G18890,AT1G20930,AT1G20950,AT1G21210,AT1G21270,AT1G21920,AT1G23540,AT1G26270,AT1G26970,AT1G29230,AT1G31230,AT1G32060,AT1G33560,AT1G47210,AT1G49580,AT1G50930,AT1G52290,AT1G52310,AT1G53430…
GO:MF	transmembrane transporter activity	GO:0022857	1.37797e-05	4.86076	1229	3203	235	23336	AT1G01340,AT1G05300,AT1G08100,AT1G08930,AT1G10800,AT1G11670,AT1G12500,AT1G14360,AT1G15210,AT1G15460,AT1G16310,AT1G16390,AT1G18880,AT1G21140,AT1G22570,AT1G22710,AT1G23080,AT1G25480,AT1G25500,AT1G27770,AT1G30840,AT1G31885,AT1G32450,AT1G33110,AT1G33440,AT1G34020,AT1G35350,AT1G49960,AT1G52190,AT1G59870,AT1G60050,AT1G60160,AT1G62320,AT1G64650,AT1G64780,AT1G66760,AT1G66780,AT1G69850,AT1G70330,AT1G70480…
GO:MF	adenyl ribonucleotide binding	GO:0032559	1.46381e-05	4.83451	2525	3203	437	23336	AT1G01340,AT1G01910,AT1G02500,AT1G03920,AT1G04400,AT1G04700,AT1G06430,AT1G06840,AT1G07560,AT1G08590,AT1G08650,AT1G09000,AT1G09080,AT1G09170,AT1G09450,AT1G09970,AT1G10670,AT1G10760,AT1G10940,AT1G11050,AT1G11130,AT1G11330,AT1G12000,AT1G13210,AT1G14230,AT1G14240,AT1G14460,AT1G15210,AT1G15530,AT1G16130,AT1G16280,AT1G16390,AT1G16440,AT1G17750,AT1G18370,AT1G18390,AT1G18550,AT1G18890,AT1G20750,AT1G20930…
GO:MF	transporter activity	GO:0005215	1.78017e-05	4.74954	1270	3203	241	23336	AT1G01340,AT1G05300,AT1G08100,AT1G08930,AT1G10800,AT1G11670,AT1G12500,AT1G13210,AT1G14360,AT1G15210,AT1G15460,AT1G16310,AT1G16390,AT1G18880,AT1G21140,AT1G22570,AT1G22710,AT1G23080,AT1G25480,AT1G25500,AT1G27770,AT1G30840,AT1G31885,AT1G32450,AT1G33110,AT1G33440,AT1G34020,AT1G35350,AT1G49960,AT1G52190,AT1G59870,AT1G60050,AT1G60160,AT1G62320,AT1G64650,AT1G64780,AT1G66760,AT1G66780,AT1G68710,AT1G69850…
GO:MF	adenyl nucleotide binding	GO:0030554	1.81462e-05	4.74121	2536	3203	438	23336	AT1G01340,AT1G01910,AT1G02500,AT1G03920,AT1G04400,AT1G04700,AT1G06430,AT1G06840,AT1G07560,AT1G08590,AT1G08650,AT1G09000,AT1G09080,AT1G09170,AT1G09450,AT1G09970,AT1G10670,AT1G10760,AT1G10940,AT1G11050,AT1G11130,AT1G11330,AT1G12000,AT1G13210,AT1G14230,AT1G14240,AT1G14460,AT1G15210,AT1G15530,AT1G16130,AT1G16280,AT1G16390,AT1G16440,AT1G17750,AT1G18370,AT1G18390,AT1G18550,AT1G18890,AT1G20750,AT1G20930…
GO:MF	cyclin-dependent protein serine/threonine kinase regulator activity	GO:0016538	1.8397e-05	4.73525	51	3203	23	23336	AT1G14750,AT1G15570,AT1G20610,AT1G44110,AT1G47210,AT1G70210,AT1G76310,AT1G77390,AT1G80370,AT2G17620,AT2G26760,AT2G27970,AT3G11520,AT3G50630,AT4G19600,AT4G34160,AT4G35620,AT5G04470,AT5G06150,AT5G11300,AT5G25380,AT5G43080,AT5G48820
GO:MF	signaling receptor activity	GO:0038023	1.95319e-05	4.70926	228	3203	62	23336	AT1G04400,AT1G09970,AT1G11050,AT1G15530,AT1G24020,AT1G52310,AT1G53730,AT1G61380,AT1G66340,AT1G68690,AT1G71830,AT2G01830,AT2G01950,AT2G02220,AT2G11520,AT2G18790,AT2G20850,AT2G23950,AT2G24150,AT2G26040,AT2G29120,AT2G32390,AT2G38310,AT2G40330,AT2G41820,AT3G04110,AT3G13380,AT3G13690,AT3G21340,AT3G21630,AT3G45430,AT3G45780,AT3G46760,AT3G51550,AT3G53810,AT3G59700,AT4G01026,AT4G02410,AT4G16250,AT4G20270…
GO:MF	purine ribonucleoside triphosphate binding	GO:0035639	3.52119e-05	4.45331	2682	3203	458	23336	AT1G01910,AT1G02500,AT1G03920,AT1G04170,AT1G04400,AT1G04700,AT1G04820,AT1G06430,AT1G06840,AT1G07560,AT1G08590,AT1G08650,AT1G09000,AT1G09080,AT1G09170,AT1G09450,AT1G09970,AT1G10670,AT1G10760,AT1G10940,AT1G11050,AT1G11130,AT1G11330,AT1G12000,AT1G13210,AT1G14230,AT1G14240,AT1G14460,AT1G15210,AT1G15530,AT1G16130,AT1G16280,AT1G16390,AT1G16440,AT1G17470,AT1G17750,AT1G18070,AT1G18200,AT1G18370,AT1G18390…
GO:MF	cytoskeletal motor activity	GO:0003774	6.00188e-05	4.22171	82	3203	30	23336	AT1G09170,AT1G18370,AT1G18550,AT1G72250,AT1G73860,AT2G22610,AT2G28620,AT2G31900,AT2G36200,AT2G37420,AT2G47500,AT3G10310,AT3G19050,AT3G20150,AT3G23670,AT3G44050,AT3G45850,AT4G14150,AT4G14330,AT4G21270,AT4G24170,AT4G26660,AT4G27180,AT4G38950,AT5G02370,AT5G23910,AT5G27000,AT5G55520,AT5G60930,AT5G66310
GO:MF	heme binding	GO:0020037	6.29935e-05	4.2007	385	3203	90	23336	AT1G01190,AT1G05240,AT1G05260,AT1G12740,AT1G13080,AT1G13110,AT1G20630,AT1G30870,AT1G33730,AT1G34510,AT1G44970,AT1G64900,AT1G64950,AT1G67110,AT1G68850,AT1G71695,AT1G73680,AT1G77490,AT2G14100,AT2G16060,AT2G18980,AT2G23180,AT2G25160,AT2G32720,AT2G38380,AT2G38390,AT2G39040,AT2G40000,AT2G42850,AT2G45970,AT2G46950,AT3G01190,AT3G03890,AT3G10520,AT3G14610,AT3G14690,AT3G20100,AT3G20940,AT3G26210,AT3G26290…
GO:MF	purine ribonucleotide binding	GO:0032555	6.76498e-05	4.16973	2796	3203	473	23336	AT1G01340,AT1G01910,AT1G02500,AT1G03920,AT1G04170,AT1G04400,AT1G04700,AT1G04820,AT1G06430,AT1G06840,AT1G07560,AT1G08590,AT1G08650,AT1G09000,AT1G09080,AT1G09170,AT1G09450,AT1G09970,AT1G10670,AT1G10760,AT1G10940,AT1G11050,AT1G11130,AT1G11330,AT1G12000,AT1G13210,AT1G14230,AT1G14240,AT1G14460,AT1G15210,AT1G15530,AT1G16130,AT1G16280,AT1G16390,AT1G16440,AT1G17470,AT1G17750,AT1G18070,AT1G18200,AT1G18370…
GO:MF	purine nucleotide binding	GO:0017076	8.55177e-05	4.06794	2808	3203	474	23336	AT1G01340,AT1G01910,AT1G02500,AT1G03920,AT1G04170,AT1G04400,AT1G04700,AT1G04820,AT1G06430,AT1G06840,AT1G07560,AT1G08590,AT1G08650,AT1G09000,AT1G09080,AT1G09170,AT1G09450,AT1G09970,AT1G10670,AT1G10760,AT1G10940,AT1G11050,AT1G11130,AT1G11330,AT1G12000,AT1G13210,AT1G14230,AT1G14240,AT1G14460,AT1G15210,AT1G15530,AT1G16130,AT1G16280,AT1G16390,AT1G16440,AT1G17470,AT1G17750,AT1G18070,AT1G18200,AT1G18370…
GO:MF	ribonucleotide binding	GO:0032553	9.20145e-05	4.03614	2823	3203	476	23336	AT1G01340,AT1G01910,AT1G02500,AT1G03920,AT1G04170,AT1G04400,AT1G04700,AT1G04820,AT1G06430,AT1G06840,AT1G07560,AT1G08590,AT1G08650,AT1G09000,AT1G09080,AT1G09170,AT1G09450,AT1G09970,AT1G10670,AT1G10760,AT1G10940,AT1G11050,AT1G11130,AT1G11330,AT1G12000,AT1G13210,AT1G14230,AT1G14240,AT1G14460,AT1G15210,AT1G15530,AT1G16130,AT1G16280,AT1G16390,AT1G16440,AT1G17470,AT1G17750,AT1G18070,AT1G18200,AT1G18370…
GO:MF	carbohydrate derivative binding	GO:0097367	0.000100373	3.99838	2865	3203	482	23336	AT1G01340,AT1G01910,AT1G02500,AT1G03920,AT1G04170,AT1G04400,AT1G04700,AT1G04820,AT1G06430,AT1G06840,AT1G07560,AT1G08590,AT1G08650,AT1G09000,AT1G09080,AT1G09170,AT1G09450,AT1G09970,AT1G10670,AT1G10760,AT1G10940,AT1G11050,AT1G11130,AT1G11330,AT1G12000,AT1G13210,AT1G14230,AT1G14240,AT1G14460,AT1G15210,AT1G15530,AT1G16130,AT1G16280,AT1G16390,AT1G16440,AT1G17470,AT1G17750,AT1G18070,AT1G18200,AT1G18370…
GO:MF	hexosyltransferase activity	GO:0016758	0.000280985	3.55132	364	3203	84	23336	AT1G02730,AT1G05560,AT1G05590,AT1G05675,AT1G05680,AT1G06490,AT1G07260,AT1G08280,AT1G09350,AT1G11545,AT1G11730,AT1G13250,AT1G19300,AT1G22360,AT1G22400,AT1G27120,AT1G30530,AT1G32900,AT1G51630,AT1G54940,AT1G73880,AT1G77130,AT1G78580,AT2G13290,AT2G15480,AT2G15490,AT2G18800,AT2G29750,AT2G31750,AT2G33570,AT2G35650,AT2G36390,AT2G36800,AT2G36870,AT2G37090,AT2G43820,AT3G01040,AT3G11670,AT3G14960,AT3G16520…
GO:MF	UDP-glycosyltransferase activity	GO:0008194	0.000417928	3.3789	301	3203	72	23336	AT1G02730,AT1G05560,AT1G05590,AT1G05675,AT1G05680,AT1G06490,AT1G07260,AT1G09350,AT1G10400,AT1G11730,AT1G13250,AT1G19300,AT1G22360,AT1G22400,AT1G30530,AT1G32900,AT1G54940,AT1G64920,AT1G73880,AT1G77130,AT1G78580,AT2G13290,AT2G15480,AT2G15490,AT2G18560,AT2G18570,AT2G22590,AT2G22930,AT2G28080,AT2G29750,AT2G30140,AT2G30150,AT2G31750,AT2G33570,AT2G36800,AT2G37090,AT2G43820,AT3G01040,AT3G11670,AT3G14960…
GO:MF	molecular transducer activity	GO:0060089	0.000430324	3.3662	258	3203	64	23336	AT1G04400,AT1G09970,AT1G11050,AT1G15530,AT1G24020,AT1G52310,AT1G53730,AT1G59940,AT1G61380,AT1G66340,AT1G68690,AT1G71830,AT2G01830,AT2G01950,AT2G02220,AT2G11520,AT2G18790,AT2G20850,AT2G23950,AT2G24150,AT2G26040,AT2G29120,AT2G32390,AT2G38310,AT2G40330,AT2G40670,AT2G41820,AT3G04110,AT3G13380,AT3G13690,AT3G21340,AT3G21630,AT3G45430,AT3G45780,AT3G46760,AT3G51550,AT3G53810,AT3G59700,AT4G01026,AT4G02410…
GO:MF	hydroquinone:oxygen oxidoreductase activity	GO:0052716	0.000609872	3.21476	17	3203	11	23336	AT1G18140,AT2G29130,AT2G30210,AT2G38080,AT3G09220,AT5G01190,AT5G03260,AT5G05390,AT5G07130,AT5G58910,AT5G60020
GO:MF	structural constituent of chromatin	GO:0030527	0.000644916	3.1905	56	3203	22	23336	AT1G01370,AT1G07660,AT1G07790,AT1G07820,AT1G09200,AT1G51060,AT2G18050,AT2G28740,AT2G37470,AT3G20670,AT3G46030,AT3G46320,AT3G53730,AT3G54560,AT5G10390,AT5G10400,AT5G22880,AT5G54640,AT5G59690,AT5G59870,AT5G59910,AT5G65360
GO:MF	transferase activity	GO:0016740	0.000757885	3.1204	4144	3203	663	23336	AT1G01610,AT1G01660,AT1G02500,AT1G02730,AT1G02860,AT1G02920,AT1G02950,AT1G03920,AT1G04050,AT1G04700,AT1G05560,AT1G05590,AT1G05675,AT1G05680,AT1G06490,AT1G06520,AT1G06840,AT1G07260,AT1G07560,AT1G08280,AT1G08510,AT1G08590,AT1G08650,AT1G08660,AT1G08990,AT1G09000,AT1G09350,AT1G09450,AT1G09815,AT1G09970,AT1G10170,AT1G10280,AT1G10360,AT1G10400,AT1G10560,AT1G10670,AT1G10760,AT1G10940,AT1G11050,AT1G11130…
GO:MF	glucosyltransferase activity	GO:0046527	0.00125839	2.90018	181	3203	48	23336	AT1G02730,AT1G05560,AT1G05590,AT1G05675,AT1G05680,AT1G06490,AT1G07260,AT1G11545,AT1G22360,AT1G22400,AT1G30530,AT1G32900,AT1G73880,AT1G78580,AT2G15480,AT2G15490,AT2G18800,AT2G29750,AT2G31750,AT2G36800,AT2G36870,AT2G43820,AT3G16520,AT3G44990,AT3G46690,AT3G46700,AT4G03210,AT4G15290,AT4G15490,AT4G18780,AT4G25810,AT4G26850,AT4G28850,AT4G30270,AT4G30280,AT4G34135,AT4G34138,AT4G37800,AT5G09870,AT5G13870…
GO:MF	glycosyltransferase activity	GO:0016757	0.002081	2.68173	629	3203	126	23336	AT1G02730,AT1G05560,AT1G05590,AT1G05675,AT1G05680,AT1G06490,AT1G07260,AT1G08280,AT1G08660,AT1G08990,AT1G09350,AT1G10280,AT1G10400,AT1G11545,AT1G11730,AT1G13250,AT1G19300,AT1G22360,AT1G22400,AT1G23550,AT1G27120,AT1G28240,AT1G30530,AT1G32230,AT1G32900,AT1G51630,AT1G51770,AT1G54940,AT1G63450,AT1G64920,AT1G68470,AT1G70290,AT1G73880,AT1G77130,AT1G78580,AT1G80050,AT2G13290,AT2G15480,AT2G15490,AT2G18560…
GO:MF	enzyme regulator activity	GO:0030234	0.00440127	2.35642	560	3203	113	23336	AT1G01700,AT1G03680,AT1G03760,AT1G05640,AT1G07140,AT1G07370,AT1G07710,AT1G08340,AT1G14750,AT1G14890,AT1G15570,AT1G20610,AT1G23200,AT1G24020,AT1G44110,AT1G47210,AT1G48870,AT1G53830,AT1G53840,AT1G62770,AT1G70210,AT1G72060,AT1G73330,AT1G73500,AT1G73580,AT1G75990,AT1G76310,AT1G77390,AT1G79860,AT1G80370,AT2G01470,AT2G17620,AT2G25240,AT2G25770,AT2G26040,AT2G26300,AT2G26390,AT2G26440,AT2G26760,AT2G27970…
GO:MF	metal ion binding	GO:0046872	0.00611126	2.21387	3803	3203	604	23336	AT1G01190,AT1G01350,AT1G01580,AT1G02205,AT1G02335,AT1G02500,AT1G02860,AT1G02920,AT1G03850,AT1G04020,AT1G04050,AT1G04350,AT1G04400,AT1G04680,AT1G04990,AT1G05240,AT1G05260,AT1G05500,AT1G05630,AT1G05990,AT1G06080,AT1G06330,AT1G06430,AT1G06450,AT1G06570,AT1G06650,AT1G06680,AT1G06830,AT1G08830,AT1G08990,AT1G09090,AT1G09350,AT1G09560,AT1G10170,AT1G10460,AT1G10480,AT1G10600,AT1G10760,AT1G11920,AT1G12000…
GO:MF	cation binding	GO:0043169	0.00767427	2.11496	3824	3203	606	23336	AT1G01190,AT1G01350,AT1G01580,AT1G02205,AT1G02335,AT1G02500,AT1G02860,AT1G02920,AT1G03850,AT1G04020,AT1G04050,AT1G04350,AT1G04400,AT1G04680,AT1G04990,AT1G05240,AT1G05260,AT1G05500,AT1G05630,AT1G05990,AT1G06080,AT1G06330,AT1G06430,AT1G06450,AT1G06570,AT1G06650,AT1G06680,AT1G06830,AT1G08830,AT1G08990,AT1G09090,AT1G09350,AT1G09560,AT1G10170,AT1G10460,AT1G10480,AT1G10600,AT1G10760,AT1G11920,AT1G12000…
GO:MF	kinase regulator activity	GO:0019207	0.00841346	2.07503	111	3203	32	23336	AT1G14750,AT1G15570,AT1G20610,AT1G44110,AT1G47210,AT1G70210,AT1G73500,AT1G76310,AT1G77390,AT1G80370,AT2G17620,AT2G26760,AT2G27970,AT2G37380,AT3G11520,AT3G50630,AT4G01900,AT4G17270,AT4G19600,AT4G22860,AT4G27460,AT4G34160,AT4G35620,AT5G04470,AT5G06150,AT5G11300,AT5G15510,AT5G25380,AT5G26230,AT5G37478,AT5G43080,AT5G48820
GO:MF	transmembrane receptor protein kinase activity	GO:0019199	0.0103831	1.98367	122	3203	34	23336	AT1G11050,AT1G15530,AT1G52310,AT1G53730,AT1G68690,AT1G71830,AT2G01830,AT2G01950,AT2G11520,AT2G20850,AT2G41820,AT3G13380,AT3G13690,AT3G21340,AT3G21630,AT3G45430,AT3G46760,AT3G51550,AT3G53810,AT3G59700,AT4G02410,AT4G21380,AT4G30520,AT4G33430,AT4G35030,AT5G11020,AT5G14210,AT5G20480,AT5G23170,AT5G24010,AT5G42440,AT5G55830,AT5G60270,AT5G63940
GO:MF	transmembrane receptor protein tyrosine kinase activity	GO:0004714	0.0118958	1.92461	61	3203	21	23336	AT1G11050,AT1G52310,AT1G53730,AT1G68690,AT1G71830,AT2G11520,AT2G20850,AT2G41820,AT3G13380,AT3G13690,AT3G21340,AT3G51550,AT4G30520,AT4G33430,AT4G35030,AT5G11020,AT5G14210,AT5G23170,AT5G24010,AT5G42440,AT5G63940
GO:MF	monocarboxylic acid binding	GO:0033293	0.0120545	1.91885	70	3203	23	23336	AT1G03680,AT1G06680,AT1G24020,AT1G42970,AT1G53520,AT1G67090,AT1G79870,AT2G26040,AT2G37870,AT2G38310,AT2G40330,AT3G26650,AT3G53980,AT3G63170,AT4G01026,AT4G02520,AT4G13930,AT4G23920,AT4G36760,AT5G05440,AT5G05960,AT5G35630,AT5G65110
GO:MF	molecular function regulator activity	GO:0098772	0.0137762	1.86087	660	3203	127	23336	AT1G01700,AT1G02900,AT1G03680,AT1G03760,AT1G05640,AT1G07140,AT1G07370,AT1G07710,AT1G08340,AT1G14750,AT1G14890,AT1G15570,AT1G20610,AT1G23200,AT1G24020,AT1G44110,AT1G47210,AT1G48870,AT1G53830,AT1G53840,AT1G62770,AT1G70210,AT1G72060,AT1G73330,AT1G73500,AT1G73580,AT1G75990,AT1G76310,AT1G77390,AT1G79860,AT1G80370,AT2G01470,AT2G17620,AT2G22860,AT2G25240,AT2G25770,AT2G26040,AT2G26300,AT2G26390,AT2G26440…
GO:MF	FAD binding	GO:0071949	0.0146038	1.83554	80	3203	25	23336	AT1G04400,AT1G24340,AT1G30720,AT1G30730,AT2G29720,AT2G38960,AT2G44160,AT2G46750,AT2G46760,AT3G19820,AT3G43600,AT3G59970,AT4G15760,AT4G20860,AT4G29740,AT4G34890,AT4G36400,AT4G38540,AT5G11540,AT5G20960,AT5G24850,AT5G38710,AT5G44400,AT5G56970,AT5G65110
GO:MF	xyloglucan:xyloglucosyl transferase activity	GO:0016762	0.0175111	1.75669	33	3203	14	23336	AT1G11545,AT2G18800,AT2G36870,AT3G44990,AT4G03210,AT4G25810,AT4G28850,AT4G30270,AT4G30280,AT4G37800,AT5G13870,AT5G57530,AT5G57540,AT5G57560
GO:MF	transferase activity, transferring phosphorus-containing groups	GO:0016772	0.017814	1.74924	1705	3203	289	23336	AT1G03920,AT1G04700,AT1G06840,AT1G07560,AT1G08590,AT1G08650,AT1G09000,AT1G09450,AT1G09815,AT1G09970,AT1G10760,AT1G10940,AT1G11050,AT1G11130,AT1G11330,AT1G12000,AT1G12330,AT1G14460,AT1G15530,AT1G16130,AT1G16440,AT1G17750,AT1G18390,AT1G18890,AT1G20930,AT1G20950,AT1G21210,AT1G21270,AT1G21920,AT1G23540,AT1G26270,AT1G26970,AT1G29230,AT1G31070,AT1G31230,AT1G32060,AT1G33560,AT1G47210,AT1G49580,AT1G50930…
GO:MF	pectate lyase activity	GO:0030570	0.0221993	1.65366	26	3203	12	23336	AT1G04680,AT1G11920,AT1G67750,AT3G07010,AT3G24670,AT3G27400,AT3G53190,AT4G13210,AT4G13710,AT4G22080,AT4G24780,AT5G48900
GO:MF	chlorophyll binding	GO:0016168	0.0260216	1.58467	34	3203	14	23336	AT1G15820,AT1G29930,AT1G44575,AT1G61520,AT2G05070,AT2G05100,AT2G34420,AT3G08940,AT3G47470,AT3G54890,AT3G61470,AT4G10340,AT5G01530,AT5G54270
GO:MF	anion transmembrane transporter activity	GO:0008509	0.0312492	1.50516	192	3203	46	23336	AT1G08100,AT1G14360,AT1G15460,AT1G18880,AT1G25480,AT1G32450,AT1G35350,AT1G52190,AT1G64650,AT1G69850,AT1G72140,AT1G76430,AT1G80050,AT1G80300,AT1G80760,AT2G02810,AT2G03240,AT2G28315,AT2G39510,AT2G40900,AT2G47160,AT3G21670,AT3G45680,AT3G45700,AT3G45710,AT3G51870,AT3G51895,AT3G55740,AT3G62270,AT4G19030,AT4G21120,AT4G21680,AT4G24570,AT4G27970,AT4G28390,AT4G31600,AT5G14570,AT5G24030,AT5G43350,AT5G46110…
GO:BP	response to stimulus	GO:0050896	3.1202e-43	42.5058	6382	3002	1168	23012	AT1G01340,AT1G01580,AT1G01720,AT1G02205,AT1G02300,AT1G02340,AT1G02660,AT1G02730,AT1G02860,AT1G02900,AT1G02920,AT1G02950,AT1G03680,AT1G03850,AT1G03920,AT1G04020,AT1G04180,AT1G04250,AT1G04400,AT1G04550,AT1G04610,AT1G04700,AT1G04980,AT1G05240,AT1G05260,AT1G05560,AT1G05630,AT1G05680,AT1G06330,AT1G06830,AT1G07260,AT1G07370,AT1G07530,AT1G07660,AT1G07820,AT1G08100,AT1G08320,AT1G08340,AT1G08650,AT1G08830…
GO:BP	response to chemical	GO:0042221	2.85718e-42	41.5441	3106	3002	667	23012	AT1G01340,AT1G01720,AT1G02205,AT1G02340,AT1G02730,AT1G02860,AT1G02920,AT1G02950,AT1G03850,AT1G04180,AT1G04250,AT1G04400,AT1G04550,AT1G04610,AT1G05240,AT1G05260,AT1G05560,AT1G05630,AT1G05680,AT1G07530,AT1G07660,AT1G07820,AT1G08100,AT1G08320,AT1G08650,AT1G08830,AT1G08930,AT1G09070,AT1G09080,AT1G09090,AT1G09310,AT1G09340,AT1G10140,AT1G10170,AT1G10360,AT1G10480,AT1G10560,AT1G11670,AT1G12000,AT1G12010…
GO:BP	cellular response to chemical stimulus	GO:0070887	3.07213e-24	23.5126	1791	3002	392	23012	AT1G01720,AT1G02340,AT1G04250,AT1G04550,AT1G05240,AT1G05260,AT1G05630,AT1G05680,AT1G08100,AT1G08830,AT1G09070,AT1G09080,AT1G09090,AT1G09340,AT1G10140,AT1G10480,AT1G10560,AT1G12010,AT1G12240,AT1G12520,AT1G12820,AT1G13260,AT1G13300,AT1G14360,AT1G15010,AT1G15100,AT1G15380,AT1G15460,AT1G16060,AT1G16310,AT1G16510,AT1G18890,AT1G19350,AT1G20630,AT1G20930,AT1G21410,AT1G21910,AT1G22220,AT1G23080,AT1G23710…
GO:BP	cell wall organization or biogenesis	GO:0071554	4.91887e-24	23.3081	700	3002	197	23012	AT1G02730,AT1G05240,AT1G05310,AT1G06490,AT1G08990,AT1G11545,AT1G12040,AT1G12260,AT1G12560,AT1G12780,AT1G13250,AT1G19300,AT1G19900,AT1G20190,AT1G22880,AT1G23200,AT1G23720,AT1G27120,AT1G27930,AT1G28240,AT1G33800,AT1G34350,AT1G43790,AT1G48100,AT1G48930,AT1G51630,AT1G53830,AT1G53840,AT1G54940,AT1G56680,AT1G59870,AT1G62980,AT1G62990,AT1G63000,AT1G63450,AT1G64390,AT1G64670,AT1G66230,AT1G66340,AT1G69530…
GO:BP	root development	GO:0048364	1.80405e-20	19.7438	614	3002	172	23012	AT1G01380,AT1G01550,AT1G01910,AT1G02335,AT1G02900,AT1G04550,AT1G05630,AT1G08100,AT1G09540,AT1G09560,AT1G10480,AT1G10940,AT1G11130,AT1G12040,AT1G12240,AT1G12560,AT1G12820,AT1G13260,AT1G13300,AT1G15570,AT1G16440,AT1G16510,AT1G21210,AT1G21410,AT1G27740,AT1G32230,AT1G36160,AT1G44900,AT1G47200,AT1G48920,AT1G49430,AT1G53330,AT1G56010,AT1G59870,AT1G63450,AT1G64670,AT1G69935,AT1G70940,AT1G73590,AT1G74500…
GO:BP	root system development	GO:0022622	2.19098e-20	19.6594	615	3002	172	23012	AT1G01380,AT1G01550,AT1G01910,AT1G02335,AT1G02900,AT1G04550,AT1G05630,AT1G08100,AT1G09540,AT1G09560,AT1G10480,AT1G10940,AT1G11130,AT1G12040,AT1G12240,AT1G12560,AT1G12820,AT1G13260,AT1G13300,AT1G15570,AT1G16440,AT1G16510,AT1G21210,AT1G21410,AT1G27740,AT1G32230,AT1G36160,AT1G44900,AT1G47200,AT1G48920,AT1G49430,AT1G53330,AT1G56010,AT1G59870,AT1G63450,AT1G64670,AT1G69935,AT1G70940,AT1G73590,AT1G74500…
GO:BP	cell wall organization	GO:0071555	1.14572e-19	18.9409	532	3002	154	23012	AT1G02730,AT1G05240,AT1G05310,AT1G06490,AT1G08990,AT1G11545,AT1G12040,AT1G12260,AT1G12560,AT1G12780,AT1G13250,AT1G19300,AT1G19900,AT1G20190,AT1G22880,AT1G23200,AT1G23720,AT1G27930,AT1G28240,AT1G34350,AT1G43790,AT1G48100,AT1G48930,AT1G51630,AT1G53830,AT1G53840,AT1G54940,AT1G59870,AT1G62980,AT1G63000,AT1G64390,AT1G64670,AT1G66340,AT1G69530,AT1G70370,AT1G70710,AT1G71930,AT1G73360,AT1G73410,AT1G75680…
GO:BP	response to abiotic stimulus	GO:0009628	2.80799e-18	17.5516	2170	3002	432	23012	AT1G01720,AT1G02205,AT1G02340,AT1G02730,AT1G03680,AT1G04400,AT1G05260,AT1G05630,AT1G05680,AT1G07660,AT1G07820,AT1G08650,AT1G08830,AT1G08930,AT1G09070,AT1G09090,AT1G09340,AT1G09350,AT1G10140,AT1G10170,AT1G10670,AT1G10760,AT1G10940,AT1G13080,AT1G13260,AT1G13300,AT1G13740,AT1G15010,AT1G15100,AT1G15380,AT1G15820,AT1G16060,AT1G16390,AT1G16510,AT1G17190,AT1G17400,AT1G19115,AT1G19350,AT1G20450,AT1G20630…
GO:BP	cellular response to stimulus	GO:0051716	6.61932e-18	17.1792	3315	3002	607	23012	AT1G01720,AT1G02340,AT1G02860,AT1G02900,AT1G03920,AT1G04020,AT1G04250,AT1G04400,AT1G04550,AT1G04700,AT1G04980,AT1G05240,AT1G05260,AT1G05630,AT1G05680,AT1G06830,AT1G07370,AT1G08100,AT1G08320,AT1G08340,AT1G08650,AT1G08830,AT1G09000,AT1G09070,AT1G09080,AT1G09090,AT1G09340,AT1G09450,AT1G09815,AT1G10140,AT1G10480,AT1G10560,AT1G10940,AT1G12010,AT1G12240,AT1G12520,AT1G12820,AT1G13260,AT1G13300,AT1G13635…
GO:BP	response to organic substance	GO:0010033	9.43024e-18	17.0255	2070	3002	414	23012	AT1G01720,AT1G02340,AT1G02860,AT1G03850,AT1G04180,AT1G04250,AT1G04400,AT1G04550,AT1G04610,AT1G05560,AT1G05630,AT1G05680,AT1G08320,AT1G08650,AT1G08830,AT1G08930,AT1G09080,AT1G09310,AT1G10480,AT1G10560,AT1G12000,AT1G12010,AT1G12240,AT1G12820,AT1G13260,AT1G13300,AT1G13420,AT1G13740,AT1G14360,AT1G15100,AT1G15380,AT1G16060,AT1G16310,AT1G16510,AT1G17750,AT1G18890,AT1G19350,AT1G20160,AT1G20450,AT1G20630…
GO:BP	response to oxygen-containing compound	GO:1901700	5.01908e-17	16.2994	1696	3002	351	23012	AT1G01720,AT1G02205,AT1G02340,AT1G02730,AT1G02860,AT1G04400,AT1G05260,AT1G05560,AT1G05630,AT1G05680,AT1G07660,AT1G07820,AT1G08100,AT1G08650,AT1G08830,AT1G08930,AT1G09080,AT1G09310,AT1G09340,AT1G10480,AT1G10560,AT1G12000,AT1G12010,AT1G12240,AT1G12520,AT1G12820,AT1G13260,AT1G13300,AT1G13740,AT1G15100,AT1G15380,AT1G16060,AT1G16310,AT1G17750,AT1G18890,AT1G19350,AT1G20160,AT1G20450,AT1G20630,AT1G20950…
GO:BP	developmental process	GO:0032502	2.43116e-16	15.6142	3292	3002	596	23012	AT1G01380,AT1G01550,AT1G01690,AT1G01910,AT1G02335,AT1G02730,AT1G02900,AT1G03910,AT1G04250,AT1G04400,AT1G04550,AT1G05630,AT1G05680,AT1G06490,AT1G06520,AT1G08100,AT1G08320,AT1G08590,AT1G08660,AT1G09080,AT1G09090,AT1G09540,AT1G09560,AT1G09970,AT1G10480,AT1G10560,AT1G10670,AT1G10940,AT1G11130,AT1G11160,AT1G12040,AT1G12240,AT1G12260,AT1G12560,AT1G12820,AT1G13260,AT1G13300,AT1G14360,AT1G14740,AT1G15040…
GO:BP	plant organ development	GO:0099402	2.58081e-16	15.5882	1164	3002	260	23012	AT1G01380,AT1G01550,AT1G01910,AT1G02335,AT1G02900,AT1G04250,AT1G04400,AT1G04550,AT1G05630,AT1G08100,AT1G08320,AT1G09540,AT1G09560,AT1G10480,AT1G10670,AT1G10940,AT1G11130,AT1G12040,AT1G12240,AT1G12560,AT1G12820,AT1G13260,AT1G13300,AT1G15570,AT1G16440,AT1G16510,AT1G19300,AT1G21210,AT1G21410,AT1G25250,AT1G27740,AT1G32230,AT1G32450,AT1G36160,AT1G44900,AT1G44970,AT1G47200,AT1G48920,AT1G49430,AT1G53190…
GO:BP	external encapsulating structure organization	GO:0045229	3.50982e-16	15.4547	579	3002	155	23012	AT1G02730,AT1G05240,AT1G05310,AT1G06490,AT1G08990,AT1G11545,AT1G12040,AT1G12260,AT1G12560,AT1G12780,AT1G13250,AT1G19300,AT1G19900,AT1G20190,AT1G22880,AT1G23200,AT1G23720,AT1G27930,AT1G28240,AT1G34350,AT1G43790,AT1G48100,AT1G48930,AT1G51630,AT1G53830,AT1G53840,AT1G54940,AT1G59870,AT1G62980,AT1G63000,AT1G64390,AT1G64670,AT1G66340,AT1G69530,AT1G70370,AT1G70710,AT1G71930,AT1G73360,AT1G73410,AT1G75680…
GO:BP	cellular process	GO:0009987	7.67303e-16	15.115	15987	3002	2289	23012	AT1G01260,AT1G01340,AT1G01350,AT1G01370,AT1G01380,AT1G01580,AT1G01610,AT1G01690,AT1G01720,AT1G01750,AT1G01910,AT1G02205,AT1G02335,AT1G02340,AT1G02500,AT1G02690,AT1G02730,AT1G02860,AT1G02900,AT1G02920,AT1G02950,AT1G03040,AT1G03130,AT1G03630,AT1G03760,AT1G03850,AT1G03910,AT1G03920,AT1G04020,AT1G04030,AT1G04050,AT1G04170,AT1G04180,AT1G04250,AT1G04400,AT1G04550,AT1G04610,AT1G04700,AT1G04760,AT1G04820…
GO:BP	response to stress	GO:0006950	9.2484e-16	15.0339	3953	3002	691	23012	AT1G01720,AT1G02205,AT1G02300,AT1G02660,AT1G02730,AT1G02860,AT1G02920,AT1G03680,AT1G03850,AT1G04020,AT1G04180,AT1G04400,AT1G04980,AT1G05240,AT1G05260,AT1G05630,AT1G05680,AT1G06830,AT1G07260,AT1G07370,AT1G07530,AT1G07660,AT1G07820,AT1G08830,AT1G08930,AT1G09000,AT1G09070,AT1G09080,AT1G09090,AT1G09340,AT1G09350,AT1G09750,AT1G09815,AT1G09970,AT1G10140,AT1G10170,AT1G10760,AT1G10940,AT1G11000,AT1G11310…
GO:BP	plant-type cell wall organization or biogenesis	GO:0071669	1.42714e-15	14.8455	297	3002	97	23012	AT1G02730,AT1G05240,AT1G12260,AT1G12560,AT1G20190,AT1G23720,AT1G27930,AT1G28240,AT1G33800,AT1G43790,AT1G48100,AT1G51630,AT1G62980,AT1G62990,AT1G66230,AT1G69530,AT1G70370,AT1G73360,AT1G73410,AT1G77130,AT1G78240,AT1G78580,AT1G79620,AT1G80350,AT2G03090,AT2G03820,AT2G04780,AT2G15440,AT2G18230,AT2G20520,AT2G24980,AT2G28315,AT2G34070,AT2G36570,AT2G37090,AT2G37640,AT2G38080,AT2G39700,AT2G40320,AT2G40610…
GO:BP	response to toxic substance	GO:0009636	5.16993e-15	14.2865	340	3002	105	23012	AT1G02920,AT1G02950,AT1G04180,AT1G05240,AT1G05260,AT1G08830,AT1G09090,AT1G10170,AT1G10360,AT1G11670,AT1G12520,AT1G15380,AT1G17190,AT1G20630,AT1G22990,AT1G27130,AT1G27140,AT1G30870,AT1G32540,AT1G33110,AT1G34510,AT1G44970,AT1G53680,AT1G59870,AT1G64060,AT1G65970,AT1G66760,AT1G66780,AT1G67070,AT1G68850,AT1G71050,AT1G71140,AT1G71695,AT1G71870,AT1G73680,AT1G77490,AT1G78370,AT1G78380,AT2G04040,AT2G04050…
GO:BP	detoxification	GO:0098754	7.84367e-15	14.1055	299	3002	96	23012	AT1G02920,AT1G02950,AT1G05240,AT1G05260,AT1G08830,AT1G09090,AT1G10360,AT1G11670,AT1G12520,AT1G15380,AT1G17190,AT1G20630,AT1G22990,AT1G27130,AT1G27140,AT1G30870,AT1G32540,AT1G33110,AT1G34510,AT1G44970,AT1G53680,AT1G59870,AT1G64060,AT1G65970,AT1G66760,AT1G66780,AT1G68850,AT1G71050,AT1G71140,AT1G71695,AT1G71870,AT1G73680,AT1G77490,AT1G78370,AT1G78380,AT2G04040,AT2G04050,AT2G18980,AT2G21045,AT2G28190…
GO:BP	protein phosphorylation	GO:0006468	8.25736e-15	14.0832	1182	3002	258	23012	AT1G03920,AT1G04700,AT1G06840,AT1G07560,AT1G08590,AT1G08650,AT1G09000,AT1G09450,AT1G09970,AT1G10940,AT1G11050,AT1G11130,AT1G11330,AT1G14750,AT1G15530,AT1G15570,AT1G16130,AT1G16440,AT1G17750,AT1G18390,AT1G18890,AT1G20610,AT1G20930,AT1G21210,AT1G21270,AT1G23540,AT1G26970,AT1G29230,AT1G44110,AT1G47210,AT1G49580,AT1G52290,AT1G52310,AT1G53430,AT1G53440,AT1G53700,AT1G53730,AT1G56145,AT1G59580,AT1G61360…
GO:BP	anatomical structure development	GO:0048856	1.46893e-14	13.833	3131	3002	563	23012	AT1G01380,AT1G01550,AT1G01690,AT1G01910,AT1G02335,AT1G02730,AT1G02900,AT1G03910,AT1G04250,AT1G04400,AT1G04550,AT1G05630,AT1G05680,AT1G06490,AT1G06520,AT1G08100,AT1G08320,AT1G08590,AT1G08660,AT1G09080,AT1G09090,AT1G09540,AT1G09560,AT1G09970,AT1G10480,AT1G10560,AT1G10670,AT1G10940,AT1G11130,AT1G11160,AT1G12040,AT1G12240,AT1G12260,AT1G12560,AT1G12820,AT1G13260,AT1G13300,AT1G14360,AT1G14740,AT1G15040…
GO:BP	response to endogenous stimulus	GO:0009719	1.56937e-14	13.8043	1669	3002	337	23012	AT1G01720,AT1G02340,AT1G03850,AT1G04180,AT1G04250,AT1G04550,AT1G04610,AT1G05630,AT1G05680,AT1G08930,AT1G09310,AT1G10480,AT1G10560,AT1G12240,AT1G12820,AT1G13260,AT1G13300,AT1G13420,AT1G13740,AT1G15100,AT1G15380,AT1G16060,AT1G16310,AT1G16510,AT1G17750,AT1G18890,AT1G19350,AT1G20450,AT1G20630,AT1G20930,AT1G21410,AT1G21910,AT1G23080,AT1G24020,AT1G24120,AT1G25540,AT1G27740,AT1G30690,AT1G31710,AT1G32230…
GO:BP	cell wall biogenesis	GO:0042546	6.545e-14	13.1841	270	3002	88	23012	AT1G02730,AT1G08990,AT1G11545,AT1G12260,AT1G19300,AT1G27930,AT1G33800,AT1G43790,AT1G51630,AT1G54940,AT1G62990,AT1G63450,AT1G66230,AT1G73140,AT1G73410,AT1G77130,AT1G78240,AT1G78580,AT1G79620,AT1G80350,AT2G03820,AT2G04780,AT2G15440,AT2G18800,AT2G20520,AT2G28315,AT2G33570,AT2G36570,AT2G36870,AT2G37090,AT2G38080,AT2G38320,AT2G39770,AT2G40320,AT3G01640,AT3G15060,AT3G19820,AT3G21190,AT3G29810,AT3G44990…
GO:BP	response to hormone	GO:0009725	1.72218e-13	12.7639	1639	3002	328	23012	AT1G01720,AT1G02340,AT1G03850,AT1G04180,AT1G04250,AT1G04550,AT1G04610,AT1G05630,AT1G05680,AT1G08930,AT1G09310,AT1G10480,AT1G10560,AT1G12240,AT1G12820,AT1G13260,AT1G13300,AT1G13420,AT1G13740,AT1G15100,AT1G15380,AT1G16060,AT1G16310,AT1G16510,AT1G17750,AT1G18890,AT1G19350,AT1G20450,AT1G20630,AT1G20930,AT1G21410,AT1G21910,AT1G23080,AT1G24020,AT1G24120,AT1G25540,AT1G27740,AT1G30690,AT1G31710,AT1G32230…
GO:BP	reactive oxygen species metabolic process	GO:0072593	1.63894e-11	10.7854	199	3002	68	23012	AT1G04400,AT1G05240,AT1G05260,AT1G08830,AT1G10170,AT1G12520,AT1G20630,AT1G30870,AT1G32230,AT1G32540,AT1G34510,AT1G44970,AT1G56060,AT1G64060,AT1G65970,AT1G66340,AT1G66350,AT1G68850,AT1G71695,AT1G77490,AT1G79440,AT2G05070,AT2G05100,AT2G18980,AT2G26300,AT2G28190,AT2G32010,AT2G38380,AT2G38390,AT2G39040,AT3G01190,AT3G03450,AT3G10500,AT3G14130,AT3G27820,AT3G28200,AT3G32980,AT3G49960,AT4G11290,AT4G12290…
GO:BP	carbohydrate metabolic process	GO:0005975	3.53989e-11	10.451	1183	3002	245	23012	AT1G02730,AT1G02850,AT1G03680,AT1G04680,AT1G05310,AT1G05590,AT1G05630,AT1G06490,AT1G07260,AT1G08990,AT1G09340,AT1G09350,AT1G09890,AT1G10640,AT1G10670,AT1G10760,AT1G11545,AT1G11920,AT1G12000,AT1G12240,AT1G12780,AT1G13250,AT1G13700,AT1G16860,AT1G19300,AT1G20950,AT1G21270,AT1G22170,AT1G22710,AT1G22880,AT1G23200,AT1G23460,AT1G26560,AT1G27930,AT1G28240,AT1G29890,AT1G30080,AT1G32060,AT1G32900,AT1G33800…
GO:BP	response to inorganic substance	GO:0010035	1.43787e-10	9.84228	790	3002	177	23012	AT1G01340,AT1G02205,AT1G02730,AT1G02860,AT1G02920,AT1G04400,AT1G05260,AT1G05680,AT1G07660,AT1G07820,AT1G08100,AT1G08830,AT1G08930,AT1G09080,AT1G09340,AT1G12520,AT1G12820,AT1G13740,AT1G15380,AT1G16060,AT1G20340,AT1G20450,AT1G20630,AT1G21140,AT1G22882,AT1G22890,AT1G22990,AT1G28520,AT1G31710,AT1G32230,AT1G32450,AT1G32540,AT1G33560,AT1G36060,AT1G43160,AT1G48420,AT1G51400,AT1G52400,AT1G53130,AT1G54100…
GO:BP	multicellular organism development	GO:0007275	2.5992e-10	9.58516	2672	3002	472	23012	AT1G01380,AT1G01550,AT1G01690,AT1G01910,AT1G02335,AT1G02730,AT1G02900,AT1G03910,AT1G04250,AT1G04400,AT1G04550,AT1G05630,AT1G05680,AT1G06520,AT1G08100,AT1G08320,AT1G08590,AT1G09090,AT1G09540,AT1G09560,AT1G09970,AT1G10480,AT1G10560,AT1G10670,AT1G10940,AT1G11130,AT1G12040,AT1G12240,AT1G12560,AT1G12820,AT1G13260,AT1G13300,AT1G14360,AT1G14740,AT1G15040,AT1G15570,AT1G16060,AT1G16280,AT1G16440,AT1G16510…
GO:BP	polysaccharide metabolic process	GO:0005976	2.60452e-10	9.58427	495	3002	124	23012	AT1G02730,AT1G04680,AT1G05310,AT1G06490,AT1G07260,AT1G08990,AT1G09340,AT1G10670,AT1G10760,AT1G11545,AT1G11920,AT1G12780,AT1G13250,AT1G16860,AT1G19300,AT1G22880,AT1G23200,AT1G27930,AT1G28240,AT1G32900,AT1G33800,AT1G48930,AT1G51630,AT1G53830,AT1G53840,AT1G54940,AT1G63450,AT1G64390,AT1G67750,AT1G70710,AT1G71930,AT1G73140,AT1G75680,AT1G77130,AT1G78240,AT2G15440,AT2G18230,AT2G18800,AT2G19150,AT2G26440…
GO:BP	phosphorus metabolic process	GO:0006793	5.69315e-10	9.24465	2245	3002	406	23012	AT1G01610,AT1G03760,AT1G03920,AT1G04400,AT1G04700,AT1G05630,AT1G05640,AT1G06520,AT1G06840,AT1G07560,AT1G07710,AT1G08590,AT1G08650,AT1G09000,AT1G09450,AT1G09970,AT1G10670,AT1G10760,AT1G10940,AT1G11050,AT1G11130,AT1G11330,AT1G12000,AT1G12330,AT1G12780,AT1G13700,AT1G14230,AT1G14240,AT1G14750,AT1G15530,AT1G15570,AT1G16130,AT1G16440,AT1G17750,AT1G18390,AT1G18890,AT1G20610,AT1G20930,AT1G20950,AT1G21210…
GO:BP	transmembrane transport	GO:0055085	6.03217e-10	9.21953	1306	3002	260	23012	AT1G01340,AT1G05300,AT1G08100,AT1G08930,AT1G10800,AT1G11670,AT1G12500,AT1G14360,AT1G15210,AT1G15460,AT1G16310,AT1G16390,AT1G18420,AT1G18880,AT1G21140,AT1G22570,AT1G22710,AT1G23080,AT1G25480,AT1G25500,AT1G27770,AT1G29260,AT1G30840,AT1G31885,AT1G32450,AT1G33110,AT1G33440,AT1G34020,AT1G35350,AT1G49960,AT1G52190,AT1G53760,AT1G55900,AT1G59870,AT1G60050,AT1G60160,AT1G62320,AT1G64780,AT1G66760,AT1G66780…
GO:BP	multicellular organismal process	GO:0032501	6.479e-10	9.18849	2950	3002	511	23012	AT1G01380,AT1G01550,AT1G01690,AT1G01910,AT1G02335,AT1G02730,AT1G02900,AT1G03910,AT1G04030,AT1G04250,AT1G04400,AT1G04550,AT1G05630,AT1G05680,AT1G06490,AT1G06520,AT1G08100,AT1G08320,AT1G08590,AT1G08660,AT1G09080,AT1G09090,AT1G09540,AT1G09560,AT1G09970,AT1G10480,AT1G10560,AT1G10670,AT1G10940,AT1G11130,AT1G12040,AT1G12240,AT1G12560,AT1G12820,AT1G13260,AT1G13300,AT1G14360,AT1G14740,AT1G15040,AT1G15570…
GO:BP	phosphorylation	GO:0016310	6.63016e-10	9.17848	1591	3002	305	23012	AT1G03920,AT1G04700,AT1G06840,AT1G07560,AT1G08590,AT1G08650,AT1G09000,AT1G09450,AT1G09970,AT1G10760,AT1G10940,AT1G11050,AT1G11130,AT1G11330,AT1G12000,AT1G12330,AT1G14750,AT1G15530,AT1G15570,AT1G16130,AT1G16440,AT1G17750,AT1G18390,AT1G18890,AT1G20610,AT1G20930,AT1G20950,AT1G21210,AT1G21270,AT1G21920,AT1G22170,AT1G23540,AT1G26270,AT1G26970,AT1G29230,AT1G31230,AT1G32060,AT1G44110,AT1G47210,AT1G49580…
GO:BP	system development	GO:0048731	6.79918e-10	9.16754	2070	3002	379	23012	AT1G01380,AT1G01550,AT1G01910,AT1G02335,AT1G02730,AT1G02900,AT1G03910,AT1G04250,AT1G04400,AT1G04550,AT1G05630,AT1G05680,AT1G08100,AT1G08320,AT1G08590,AT1G09540,AT1G09560,AT1G10480,AT1G10670,AT1G10940,AT1G11130,AT1G12040,AT1G12240,AT1G12560,AT1G12820,AT1G13260,AT1G13300,AT1G15040,AT1G15570,AT1G16440,AT1G16510,AT1G19300,AT1G21210,AT1G21410,AT1G21920,AT1G23080,AT1G25250,AT1G25540,AT1G27740,AT1G28240…
GO:BP	plant-type cell wall organization	GO:0009664	6.81679e-10	9.16642	154	3002	55	23012	AT1G05240,AT1G12560,AT1G20190,AT1G23720,AT1G27930,AT1G28240,AT1G48100,AT1G51630,AT1G62980,AT1G69530,AT1G70370,AT1G73360,AT1G78240,AT2G03090,AT2G18230,AT2G24980,AT2G34070,AT2G37640,AT2G39700,AT2G40610,AT2G41210,AT2G45890,AT2G46710,AT3G07970,AT3G21190,AT3G26610,AT3G28550,AT3G29030,AT3G29810,AT3G54580,AT3G54590,AT4G01220,AT4G01750,AT4G13390,AT4G30270,AT4G34980,AT4G39010,AT5G01360,AT5G02260,AT5G04960…
GO:BP	root morphogenesis	GO:0010015	8.05142e-10	9.09413	327	3002	91	23012	AT1G01380,AT1G01910,AT1G10480,AT1G11130,AT1G12040,AT1G12560,AT1G15570,AT1G16440,AT1G21410,AT1G27740,AT1G32230,AT1G44900,AT1G49430,AT1G59870,AT1G63450,AT1G70940,AT1G74500,AT1G77110,AT1G77690,AT2G01830,AT2G03720,AT2G22670,AT2G26420,AT2G28150,AT2G30340,AT2G31085,AT2G33680,AT2G34680,AT2G38120,AT2G41970,AT2G45890,AT3G01730,AT3G02242,AT3G04630,AT3G05090,AT3G06810,AT3G07880,AT3G20630,AT3G20860,AT3G21220…
GO:BP	trichoblast differentiation	GO:0010054	1.2138e-09	8.91585	130	3002	49	23012	AT1G01380,AT1G01910,AT1G10480,AT1G11130,AT1G12040,AT1G12560,AT1G16440,AT1G27740,AT1G59870,AT1G63450,AT1G70940,AT1G77110,AT2G03720,AT2G26420,AT2G38120,AT2G41970,AT2G45890,AT3G01730,AT3G02242,AT3G06810,AT3G20630,AT3G25710,AT3G43960,AT3G53750,AT3G61440,AT3G62680,AT4G01060,AT4G02270,AT4G14430,AT4G15290,AT4G18640,AT4G26690,AT4G31600,AT4G33880,AT4G34580,AT4G35020,AT4G35987,AT5G05500,AT5G06270,AT5G16910…
GO:BP	biological regulation	GO:0065007	1.43561e-09	8.84296	6669	3002	1035	23012	AT1G01260,AT1G01380,AT1G01580,AT1G01700,AT1G01720,AT1G02300,AT1G02335,AT1G02340,AT1G02660,AT1G02860,AT1G02900,AT1G03040,AT1G03680,AT1G03760,AT1G03850,AT1G03920,AT1G04050,AT1G04170,AT1G04180,AT1G04250,AT1G04400,AT1G04550,AT1G04610,AT1G04700,AT1G05630,AT1G05640,AT1G05680,AT1G06450,AT1G06490,AT1G06923,AT1G07140,AT1G07260,AT1G07370,AT1G07530,AT1G07710,AT1G08320,AT1G08340,AT1G08650,AT1G08830,AT1G09000…
GO:BP	anatomical structure morphogenesis	GO:0009653	1.437e-09	8.84254	1044	3002	216	23012	AT1G01380,AT1G01910,AT1G04400,AT1G05680,AT1G06490,AT1G08660,AT1G09080,AT1G10480,AT1G11130,AT1G11160,AT1G12040,AT1G12560,AT1G14740,AT1G15040,AT1G15570,AT1G16440,AT1G18370,AT1G19350,AT1G19835,AT1G20190,AT1G20930,AT1G21210,AT1G21270,AT1G21410,AT1G25250,AT1G25540,AT1G27380,AT1G27740,AT1G32230,AT1G34350,AT1G36160,AT1G44900,AT1G48920,AT1G49430,AT1G50430,AT1G50890,AT1G53190,AT1G55580,AT1G56580,AT1G59870…
GO:BP	response to lipid	GO:0033993	2.05908e-09	8.68633	999	3002	208	23012	AT1G01720,AT1G02340,AT1G04400,AT1G05630,AT1G05680,AT1G08930,AT1G09310,AT1G10480,AT1G10560,AT1G12010,AT1G12240,AT1G13260,AT1G13300,AT1G13740,AT1G15100,AT1G15380,AT1G16060,AT1G16310,AT1G17750,AT1G18890,AT1G19350,AT1G20450,AT1G20630,AT1G21910,AT1G24020,AT1G24120,AT1G25540,AT1G31710,AT1G32230,AT1G35160,AT1G43160,AT1G50420,AT1G52400,AT1G53130,AT1G53940,AT1G54100,AT1G56580,AT1G61380,AT1G62660,AT1G62810…
GO:BP	root epidermal cell differentiation	GO:0010053	3.25874e-09	8.48695	146	3002	52	23012	AT1G01380,AT1G01910,AT1G10480,AT1G11130,AT1G12040,AT1G12560,AT1G16440,AT1G27740,AT1G59870,AT1G63450,AT1G70940,AT1G77110,AT2G03720,AT2G26420,AT2G38120,AT2G41970,AT2G45890,AT3G01730,AT3G02242,AT3G06810,AT3G07880,AT3G20630,AT3G25710,AT3G27560,AT3G43960,AT3G53750,AT3G61440,AT3G62680,AT4G01060,AT4G02270,AT4G14430,AT4G15290,AT4G18640,AT4G26690,AT4G31600,AT4G33880,AT4G34580,AT4G35020,AT4G35987,AT5G05500…
GO:BP	phosphate-containing compound metabolic process	GO:0006796	6.21325e-09	8.20668	2202	3002	394	23012	AT1G01610,AT1G03760,AT1G03920,AT1G04400,AT1G04700,AT1G05630,AT1G05640,AT1G06520,AT1G06840,AT1G07560,AT1G07710,AT1G08590,AT1G08650,AT1G09000,AT1G09450,AT1G09970,AT1G10670,AT1G10760,AT1G10940,AT1G11050,AT1G11130,AT1G11330,AT1G12000,AT1G12330,AT1G13700,AT1G14230,AT1G14240,AT1G14750,AT1G15530,AT1G15570,AT1G16130,AT1G16440,AT1G17750,AT1G18390,AT1G18890,AT1G20610,AT1G20930,AT1G20950,AT1G21210,AT1G21270…
GO:BP	plant epidermis development	GO:0090558	6.63539e-09	8.17813	287	3002	81	23012	AT1G01380,AT1G01910,AT1G10480,AT1G11130,AT1G12040,AT1G12560,AT1G15570,AT1G16440,AT1G19835,AT1G20160,AT1G25250,AT1G25540,AT1G27740,AT1G56580,AT1G59870,AT1G63450,AT1G63650,AT1G64690,AT1G70410,AT1G70940,AT1G73360,AT1G77110,AT1G80350,AT1G80370,AT2G03720,AT2G18790,AT2G26420,AT2G38120,AT2G41970,AT2G45890,AT3G01500,AT3G01730,AT3G02242,AT3G06810,AT3G07880,AT3G20630,AT3G25710,AT3G27560,AT3G43960,AT3G53750…
GO:BP	cellular response to endogenous stimulus	GO:0071495	9.45653e-09	8.02427	1107	3002	223	23012	AT1G01720,AT1G02340,AT1G04250,AT1G04550,AT1G05680,AT1G10480,AT1G10560,AT1G12240,AT1G12820,AT1G13260,AT1G13300,AT1G15100,AT1G15380,AT1G16060,AT1G16310,AT1G16510,AT1G18890,AT1G19350,AT1G20930,AT1G21410,AT1G21910,AT1G23080,AT1G24020,AT1G25540,AT1G30690,AT1G32230,AT1G33600,AT1G35160,AT1G36060,AT1G43160,AT1G50640,AT1G52400,AT1G52830,AT1G53130,AT1G53700,AT1G53940,AT1G54200,AT1G56010,AT1G56150,AT1G59870…
GO:BP	cell communication	GO:0007154	9.54393e-09	8.02027	2222	3002	396	23012	AT1G01380,AT1G01720,AT1G02340,AT1G02900,AT1G03920,AT1G04250,AT1G04400,AT1G04550,AT1G04700,AT1G05630,AT1G05680,AT1G06830,AT1G08320,AT1G08340,AT1G08650,AT1G09000,AT1G09080,AT1G09340,AT1G09450,AT1G10480,AT1G10560,AT1G10940,AT1G12240,AT1G12820,AT1G13260,AT1G13300,AT1G13740,AT1G14360,AT1G15100,AT1G15380,AT1G15460,AT1G15530,AT1G16060,AT1G16130,AT1G16310,AT1G16510,AT1G18420,AT1G18890,AT1G19350,AT1G20630…
GO:BP	cellular response to organic substance	GO:0071310	9.63457e-09	8.01617	1263	3002	248	23012	AT1G01720,AT1G02340,AT1G04250,AT1G04550,AT1G05630,AT1G05680,AT1G08830,AT1G09080,AT1G10480,AT1G10560,AT1G12010,AT1G12240,AT1G12820,AT1G13260,AT1G13300,AT1G14360,AT1G15100,AT1G15380,AT1G16060,AT1G16310,AT1G16510,AT1G18890,AT1G19350,AT1G20930,AT1G21410,AT1G21910,AT1G23080,AT1G24020,AT1G25540,AT1G30690,AT1G32230,AT1G33600,AT1G35160,AT1G36060,AT1G43160,AT1G50640,AT1G52400,AT1G52830,AT1G53130,AT1G53700…
GO:BP	hydrogen peroxide catabolic process	GO:0042744	1.10384e-08	7.95709	99	3002	40	23012	AT1G05240,AT1G05260,AT1G20630,AT1G30870,AT1G34510,AT1G44970,AT1G65970,AT1G68850,AT1G71695,AT1G77490,AT2G18980,AT2G38380,AT2G38390,AT2G39040,AT3G01190,AT3G27820,AT3G28200,AT3G32980,AT3G49960,AT4G11290,AT4G16270,AT4G21960,AT4G26010,AT4G30170,AT4G37520,AT5G14130,AT5G15180,AT5G16710,AT5G17820,AT5G22410,AT5G24070,AT5G34850,AT5G39580,AT5G42180,AT5G51890,AT5G64100,AT5G64110,AT5G64120,AT5G66390,AT5G67400
GO:BP	trichoblast maturation	GO:0048764	1.13366e-08	7.94552	124	3002	46	23012	AT1G01380,AT1G01910,AT1G10480,AT1G12560,AT1G16440,AT1G27740,AT1G59870,AT1G63450,AT1G70940,AT1G77110,AT2G03720,AT2G26420,AT2G38120,AT2G41970,AT2G45890,AT3G01730,AT3G02242,AT3G06810,AT3G20630,AT3G25710,AT3G43960,AT3G53750,AT3G61440,AT4G01060,AT4G02270,AT4G14430,AT4G15290,AT4G18640,AT4G26690,AT4G31600,AT4G33880,AT4G34580,AT4G35020,AT4G35987,AT5G05500,AT5G06270,AT5G16910,AT5G27840,AT5G37800,AT5G44610…
GO:BP	root hair cell differentiation	GO:0048765	1.13366e-08	7.94552	124	3002	46	23012	AT1G01380,AT1G01910,AT1G10480,AT1G12560,AT1G16440,AT1G27740,AT1G59870,AT1G63450,AT1G70940,AT1G77110,AT2G03720,AT2G26420,AT2G38120,AT2G41970,AT2G45890,AT3G01730,AT3G02242,AT3G06810,AT3G20630,AT3G25710,AT3G43960,AT3G53750,AT3G61440,AT4G01060,AT4G02270,AT4G14430,AT4G15290,AT4G18640,AT4G26690,AT4G31600,AT4G33880,AT4G34580,AT4G35020,AT4G35987,AT5G05500,AT5G06270,AT5G16910,AT5G27840,AT5G37800,AT5G44610…
GO:BP	lipid metabolic process	GO:0006629	1.227e-08	7.91115	1172	3002	233	23012	AT1G01610,AT1G02205,AT1G02660,AT1G05630,AT1G06080,AT1G06520,AT1G08510,AT1G10030,AT1G10670,AT1G12740,AT1G16060,AT1G18180,AT1G20120,AT1G20560,AT1G26270,AT1G26360,AT1G28600,AT1G28670,AT1G31950,AT1G34490,AT1G36160,AT1G45201,AT1G49430,AT1G50430,AT1G51260,AT1G52400,AT1G53130,AT1G53520,AT1G53940,AT1G53990,AT1G54570,AT1G54790,AT1G56670,AT1G60810,AT1G60890,AT1G62290,AT1G62640,AT1G63050,AT1G64670,AT1G65580…
GO:BP	cell maturation	GO:0048469	1.56854e-08	7.8045	125	3002	46	23012	AT1G01380,AT1G01910,AT1G10480,AT1G12560,AT1G16440,AT1G27740,AT1G59870,AT1G63450,AT1G70940,AT1G77110,AT2G03720,AT2G26420,AT2G38120,AT2G41970,AT2G45890,AT3G01730,AT3G02242,AT3G06810,AT3G20630,AT3G25710,AT3G43960,AT3G53750,AT3G61440,AT4G01060,AT4G02270,AT4G14430,AT4G15290,AT4G18640,AT4G26690,AT4G31600,AT4G33880,AT4G34580,AT4G35020,AT4G35987,AT5G05500,AT5G06270,AT5G16910,AT5G27840,AT5G37800,AT5G44610…
GO:BP	cellular detoxification	GO:1990748	2.09288e-08	7.67926	194	3002	61	23012	AT1G05240,AT1G05260,AT1G08830,AT1G09090,AT1G12520,AT1G15380,AT1G20630,AT1G30870,AT1G32540,AT1G34510,AT1G44970,AT1G59870,AT1G64060,AT1G65970,AT1G68850,AT1G71695,AT1G73680,AT1G77490,AT1G78380,AT2G18980,AT2G28190,AT2G38380,AT2G38390,AT2G39040,AT2G48150,AT3G01190,AT3G26060,AT3G28200,AT3G29200,AT3G32980,AT3G48170,AT3G49960,AT4G02520,AT4G11290,AT4G16270,AT4G21960,AT4G22110,AT4G25090,AT4G25100,AT4G26010…
GO:BP	hydrogen peroxide metabolic process	GO:0042743	2.3772e-08	7.62393	122	3002	45	23012	AT1G05240,AT1G05260,AT1G10170,AT1G20630,AT1G30870,AT1G34510,AT1G44970,AT1G64060,AT1G65970,AT1G66340,AT1G68850,AT1G71695,AT1G77490,AT2G18980,AT2G38380,AT2G38390,AT2G39040,AT3G01190,AT3G14130,AT3G27820,AT3G28200,AT3G32980,AT3G49960,AT4G11290,AT4G16270,AT4G20860,AT4G21960,AT4G26010,AT4G30170,AT4G37520,AT5G14130,AT5G15180,AT5G16710,AT5G17820,AT5G22410,AT5G24070,AT5G34850,AT5G39580,AT5G42180,AT5G51890…
GO:BP	cellular oxidant detoxification	GO:0098869	2.55069e-08	7.59334	176	3002	57	23012	AT1G05240,AT1G05260,AT1G08830,AT1G09090,AT1G12520,AT1G20630,AT1G30870,AT1G32540,AT1G34510,AT1G44970,AT1G64060,AT1G65970,AT1G68850,AT1G71695,AT1G73680,AT1G77490,AT1G78380,AT2G18980,AT2G28190,AT2G38380,AT2G38390,AT2G39040,AT2G48150,AT3G01190,AT3G26060,AT3G28200,AT3G29200,AT3G32980,AT3G49960,AT4G02520,AT4G11290,AT4G16270,AT4G21960,AT4G25090,AT4G25100,AT4G26010,AT4G30170,AT4G31870,AT4G37520,AT5G03880…
GO:BP	cellular response to toxic substance	GO:0097237	2.66218e-08	7.57476	195	3002	61	23012	AT1G05240,AT1G05260,AT1G08830,AT1G09090,AT1G12520,AT1G15380,AT1G20630,AT1G30870,AT1G32540,AT1G34510,AT1G44970,AT1G59870,AT1G64060,AT1G65970,AT1G68850,AT1G71695,AT1G73680,AT1G77490,AT1G78380,AT2G18980,AT2G28190,AT2G38380,AT2G38390,AT2G39040,AT2G48150,AT3G01190,AT3G26060,AT3G28200,AT3G29200,AT3G32980,AT3G48170,AT3G49960,AT4G02520,AT4G11290,AT4G16270,AT4G21960,AT4G22110,AT4G25090,AT4G25100,AT4G26010…
GO:BP	hormone-mediated signaling pathway	GO:0009755	4.93688e-08	7.30655	1014	3002	205	23012	AT1G01720,AT1G02340,AT1G04250,AT1G04550,AT1G10480,AT1G10560,AT1G12240,AT1G12820,AT1G13260,AT1G13300,AT1G15100,AT1G15380,AT1G16060,AT1G16310,AT1G16510,AT1G18890,AT1G19350,AT1G20930,AT1G21410,AT1G21910,AT1G23080,AT1G24020,AT1G25540,AT1G32230,AT1G33600,AT1G35160,AT1G36060,AT1G43160,AT1G50640,AT1G52400,AT1G52830,AT1G53130,AT1G53700,AT1G53940,AT1G54200,AT1G56010,AT1G56150,AT1G59870,AT1G59940,AT1G62300…
GO:BP	cell wall polysaccharide metabolic process	GO:0010383	5.05132e-08	7.29659	151	3002	51	23012	AT1G08990,AT1G11545,AT1G19300,AT1G27930,AT1G28240,AT1G33800,AT1G51630,AT1G54940,AT1G71930,AT1G73140,AT1G77130,AT1G78240,AT2G15440,AT2G18800,AT2G36870,AT2G37090,AT2G38320,AT2G40320,AT3G21190,AT3G29810,AT3G44990,AT3G55990,AT3G62720,AT4G01220,AT4G01750,AT4G03210,AT4G08160,AT4G09990,AT4G25810,AT4G28850,AT4G30270,AT4G30280,AT4G33330,AT4G37800,AT5G01360,AT5G06610,AT5G13870,AT5G15630,AT5G15740,AT5G17420…
GO:BP	cellular carbohydrate metabolic process	GO:0044262	5.3259e-08	7.27361	510	3002	120	23012	AT1G02730,AT1G05630,AT1G06490,AT1G07260,AT1G08990,AT1G10670,AT1G10760,AT1G11545,AT1G12000,AT1G12240,AT1G12780,AT1G16860,AT1G19300,AT1G20950,AT1G22710,AT1G22880,AT1G27930,AT1G28240,AT1G32900,AT1G33800,AT1G48930,AT1G51630,AT1G54940,AT1G59171,AT1G62660,AT1G64390,AT1G65580,AT1G66970,AT1G70290,AT1G70710,AT1G71930,AT1G73140,AT1G75680,AT1G77130,AT1G78090,AT1G78240,AT1G78580,AT2G15440,AT2G18800,AT2G19450…
GO:BP	cellular response to hormone stimulus	GO:0032870	8.62657e-08	7.06416	1076	3002	214	23012	AT1G01720,AT1G02340,AT1G04250,AT1G04550,AT1G05680,AT1G10480,AT1G10560,AT1G12240,AT1G12820,AT1G13260,AT1G13300,AT1G15100,AT1G15380,AT1G16060,AT1G16310,AT1G16510,AT1G18890,AT1G19350,AT1G20930,AT1G21410,AT1G21910,AT1G23080,AT1G24020,AT1G25540,AT1G30690,AT1G32230,AT1G33600,AT1G35160,AT1G36060,AT1G43160,AT1G50640,AT1G52400,AT1G52830,AT1G53130,AT1G53700,AT1G53940,AT1G54200,AT1G56010,AT1G56150,AT1G59870…
GO:BP	response to external stimulus	GO:0009605	8.74423e-08	7.05828	1965	3002	352	23012	AT1G01340,AT1G01580,AT1G02205,AT1G02340,AT1G02660,AT1G02860,AT1G02920,AT1G03850,AT1G04400,AT1G05630,AT1G05680,AT1G06830,AT1G07260,AT1G08320,AT1G08830,AT1G09340,AT1G09750,AT1G09970,AT1G10170,AT1G10670,AT1G10760,AT1G11310,AT1G12240,AT1G13300,AT1G15010,AT1G15460,AT1G15530,AT1G16510,AT1G17400,AT1G17750,AT1G18420,AT1G19115,AT1G19350,AT1G20160,AT1G20630,AT1G20850,AT1G22160,AT1G22500,AT1G22730,AT1G22882…
GO:BP	plant organ morphogenesis	GO:1905392	9.11119e-08	7.04043	469	3002	112	23012	AT1G01380,AT1G01910,AT1G04400,AT1G10480,AT1G11130,AT1G12040,AT1G12560,AT1G15570,AT1G16440,AT1G21410,AT1G25250,AT1G27740,AT1G32230,AT1G44900,AT1G48920,AT1G49430,AT1G53190,AT1G59870,AT1G63450,AT1G70940,AT1G73590,AT1G74500,AT1G77110,AT1G77690,AT2G01830,AT2G03720,AT2G21050,AT2G22670,AT2G26420,AT2G28150,AT2G30340,AT2G31085,AT2G33680,AT2G34680,AT2G38120,AT2G41370,AT2G41970,AT2G45890,AT2G46990,AT3G01730…
GO:BP	response to oxidative stress	GO:0006979	1.1627e-07	6.93453	454	3002	109	23012	AT1G03850,AT1G05240,AT1G05260,AT1G05680,AT1G07530,AT1G08830,AT1G09000,AT1G09080,AT1G09350,AT1G09970,AT1G12520,AT1G15380,AT1G20630,AT1G21520,AT1G30850,AT1G30870,AT1G32230,AT1G32540,AT1G32870,AT1G34510,AT1G44970,AT1G51400,AT1G53130,AT1G65970,AT1G68850,AT1G71695,AT1G72060,AT1G73120,AT1G73680,AT1G77490,AT1G78380,AT2G04795,AT2G16500,AT2G18170,AT2G18980,AT2G21195,AT2G24150,AT2G28190,AT2G38380,AT2G38390…
GO:BP	cell wall macromolecule metabolic process	GO:0044036	1.43116e-07	6.84431	183	3002	57	23012	AT1G08990,AT1G11545,AT1G19300,AT1G27120,AT1G27930,AT1G28240,AT1G33800,AT1G51630,AT1G54940,AT1G56680,AT1G71930,AT1G73140,AT1G77130,AT1G78240,AT2G15440,AT2G18800,AT2G36870,AT2G37090,AT2G38320,AT2G39770,AT2G40320,AT2G43620,AT3G16920,AT3G21190,AT3G26380,AT3G29810,AT3G44990,AT3G55990,AT3G62720,AT4G01220,AT4G01750,AT4G03210,AT4G08160,AT4G09990,AT4G25810,AT4G28850,AT4G30270,AT4G30280,AT4G33330,AT4G37800…
GO:BP	growth	GO:0040007	1.84729e-07	6.73347	718	3002	154	23012	AT1G01910,AT1G02900,AT1G04400,AT1G08660,AT1G09080,AT1G10480,AT1G11160,AT1G12040,AT1G12560,AT1G16060,AT1G16510,AT1G17400,AT1G19115,AT1G21210,AT1G21270,AT1G26945,AT1G27380,AT1G34350,AT1G44900,AT1G48100,AT1G50430,AT1G50890,AT1G50930,AT1G53700,AT1G56150,AT1G62990,AT1G63450,AT1G70370,AT1G70710,AT1G70940,AT1G74500,AT1G75750,AT1G77110,AT1G78370,AT1G78420,AT1G78580,AT1G79620,AT1G79860,AT1G80350,AT2G04550…
GO:BP	microtubule-based movement	GO:0007018	4.55775e-07	6.34125	65	3002	29	23012	AT1G09170,AT1G18370,AT1G18550,AT1G72250,AT1G73860,AT2G22610,AT2G28620,AT2G36200,AT2G37420,AT2G47500,AT3G10310,AT3G19050,AT3G20150,AT3G23670,AT3G44050,AT3G45850,AT4G14150,AT4G14330,AT4G21270,AT4G24170,AT4G26660,AT4G27180,AT4G38950,AT5G02370,AT5G23910,AT5G27000,AT5G55520,AT5G60930,AT5G66310
GO:BP	signal transduction	GO:0007165	4.91683e-07	6.30831	1986	3002	351	23012	AT1G01720,AT1G02340,AT1G02900,AT1G03920,AT1G04250,AT1G04400,AT1G04550,AT1G04700,AT1G05630,AT1G08320,AT1G08340,AT1G08650,AT1G09000,AT1G09080,AT1G09450,AT1G10480,AT1G10560,AT1G10940,AT1G12240,AT1G12820,AT1G13260,AT1G13300,AT1G13740,AT1G14360,AT1G15100,AT1G15380,AT1G15530,AT1G16060,AT1G16130,AT1G16310,AT1G16510,AT1G18890,AT1G19350,AT1G20930,AT1G21210,AT1G21270,AT1G21410,AT1G21910,AT1G22290,AT1G23080…
GO:BP	plant epidermal cell differentiation	GO:0090627	8.37345e-07	6.0771	181	3002	55	23012	AT1G01380,AT1G01910,AT1G10480,AT1G11130,AT1G12040,AT1G12560,AT1G15570,AT1G16440,AT1G27740,AT1G59870,AT1G63450,AT1G70940,AT1G77110,AT2G03720,AT2G26420,AT2G38120,AT2G41970,AT2G45890,AT3G01730,AT3G02242,AT3G06810,AT3G07880,AT3G20630,AT3G25710,AT3G27560,AT3G43960,AT3G53750,AT3G54180,AT3G61440,AT3G62680,AT4G01060,AT4G02270,AT4G14430,AT4G15290,AT4G18640,AT4G26690,AT4G31600,AT4G33880,AT4G34160,AT4G34580…
GO:BP	plant-type cell wall biogenesis	GO:0009832	8.64804e-07	6.06308	186	3002	56	23012	AT1G02730,AT1G12260,AT1G27930,AT1G33800,AT1G43790,AT1G51630,AT1G62990,AT1G66230,AT1G73410,AT1G77130,AT1G78240,AT1G78580,AT1G79620,AT1G80350,AT2G03820,AT2G04780,AT2G15440,AT2G20520,AT2G28315,AT2G36570,AT2G37090,AT2G38080,AT2G40320,AT3G19820,AT3G21190,AT3G29810,AT3G55340,AT3G59690,AT4G01220,AT4G01750,AT4G02270,AT4G03210,AT4G09990,AT4G10350,AT4G11150,AT4G15290,AT4G17220,AT4G18780,AT4G28500,AT4G33330…
GO:BP	signaling	GO:0023052	1.30369e-06	5.88483	2029	3002	355	23012	AT1G01380,AT1G01720,AT1G02340,AT1G02900,AT1G03920,AT1G04250,AT1G04400,AT1G04550,AT1G04700,AT1G05630,AT1G08320,AT1G08340,AT1G08650,AT1G09000,AT1G09080,AT1G09450,AT1G10480,AT1G10560,AT1G10940,AT1G12240,AT1G12820,AT1G13260,AT1G13300,AT1G13740,AT1G14360,AT1G15100,AT1G15380,AT1G15530,AT1G16060,AT1G16130,AT1G16310,AT1G16510,AT1G18890,AT1G19350,AT1G20930,AT1G21210,AT1G21270,AT1G21410,AT1G21910,AT1G22290…
GO:BP	tissue development	GO:0009888	1.3124e-06	5.88193	731	3002	153	23012	AT1G01380,AT1G01910,AT1G04400,AT1G05630,AT1G08590,AT1G09540,AT1G10480,AT1G11130,AT1G12040,AT1G12260,AT1G12560,AT1G14740,AT1G15570,AT1G16440,AT1G19835,AT1G20160,AT1G20930,AT1G25250,AT1G25540,AT1G27740,AT1G31320,AT1G36160,AT1G44900,AT1G50930,AT1G55580,AT1G56580,AT1G59870,AT1G62990,AT1G63450,AT1G63650,AT1G64690,AT1G66340,AT1G69440,AT1G70410,AT1G70940,AT1G71040,AT1G71930,AT1G73360,AT1G76540,AT1G77110…
GO:BP	cell development	GO:0048468	1.83243e-06	5.73697	357	3002	88	23012	AT1G01380,AT1G01910,AT1G08660,AT1G09080,AT1G10480,AT1G12040,AT1G12560,AT1G16440,AT1G19835,AT1G20850,AT1G25540,AT1G27380,AT1G27740,AT1G34350,AT1G56580,AT1G59870,AT1G63450,AT1G64690,AT1G70940,AT1G73360,AT1G77110,AT1G79860,AT1G80350,AT2G03720,AT2G19690,AT2G26420,AT2G35650,AT2G37540,AT2G38120,AT2G41210,AT2G41630,AT2G41970,AT2G45890,AT3G01730,AT3G02242,AT3G06810,AT3G09840,AT3G18000,AT3G20630,AT3G22200…
GO:BP	response to acid chemical	GO:0001101	2.16242e-06	5.66506	459	3002	106	23012	AT1G02205,AT1G02730,AT1G04400,AT1G05260,AT1G05680,AT1G07660,AT1G07820,AT1G08930,AT1G09340,AT1G13740,AT1G15380,AT1G16060,AT1G20450,AT1G22882,AT1G22890,AT1G28520,AT1G31710,AT1G32230,AT1G33560,AT1G36060,AT1G43160,AT1G52400,AT1G54100,AT1G59870,AT1G62660,AT1G62810,AT1G64660,AT1G64670,AT1G69310,AT1G73330,AT1G74520,AT1G78080,AT1G78380,AT2G01830,AT2G05070,AT2G05100,AT2G05520,AT2G15970,AT2G18050,AT2G20880…
GO:BP	plant-type secondary cell wall biogenesis	GO:0009834	2.24051e-06	5.64965	89	3002	34	23012	AT1G12260,AT1G27930,AT1G33800,AT1G43790,AT1G62990,AT1G66230,AT1G73410,AT1G77130,AT1G79620,AT2G03820,AT2G04780,AT2G15440,AT2G20520,AT2G28315,AT2G36570,AT2G37090,AT2G38080,AT2G40320,AT3G19820,AT3G59690,AT4G03210,AT4G09990,AT4G10350,AT4G18780,AT4G28500,AT4G33330,AT5G12870,AT5G15630,AT5G16600,AT5G17420,AT5G44030,AT5G48920,AT5G60490,AT5G67210
GO:BP	tropism	GO:0009606	3.95413e-06	5.40295	126	3002	42	23012	AT1G04400,AT1G05630,AT1G16510,AT1G17400,AT1G19115,AT1G25250,AT1G69935,AT1G70940,AT1G73590,AT1G76610,AT2G17990,AT2G18790,AT2G19690,AT2G21650,AT2G22460,AT2G36910,AT2G38120,AT2G41100,AT2G41660,AT2G43010,AT2G44830,AT2G46990,AT3G17600,AT3G25640,AT3G45780,AT3G47690,AT3G62100,AT4G16340,AT4G24670,AT4G35020,AT4G35987,AT5G03640,AT5G23100,AT5G45710,AT5G47990,AT5G49665,AT5G50375,AT5G55910,AT5G58140,AT5G64770…
GO:BP	cellular polysaccharide metabolic process	GO:0044264	4.03674e-06	5.39397	324	3002	81	23012	AT1G02730,AT1G06490,AT1G07260,AT1G08990,AT1G10670,AT1G10760,AT1G11545,AT1G12780,AT1G16860,AT1G19300,AT1G22880,AT1G27930,AT1G28240,AT1G32900,AT1G33800,AT1G48930,AT1G51630,AT1G54940,AT1G64390,AT1G70710,AT1G71930,AT1G73140,AT1G75680,AT1G77130,AT1G78240,AT2G15440,AT2G18800,AT2G36390,AT2G36870,AT2G37090,AT2G38320,AT2G39770,AT2G40320,AT3G02140,AT3G21190,AT3G29810,AT3G44990,AT3G55990,AT3G57200,AT3G62720…
GO:BP	developmental growth	GO:0048589	4.36468e-06	5.36005	505	3002	113	23012	AT1G01910,AT1G04400,AT1G08660,AT1G09080,AT1G10480,AT1G11160,AT1G12040,AT1G12560,AT1G21210,AT1G21270,AT1G27380,AT1G34350,AT1G44900,AT1G50430,AT1G50890,AT1G62990,AT1G63450,AT1G70940,AT1G75750,AT1G77110,AT1G78420,AT1G78580,AT1G79620,AT1G79860,AT2G04550,AT2G05520,AT2G19690,AT2G19760,AT2G23950,AT2G26420,AT2G28350,AT2G28620,AT2G35650,AT2G37540,AT2G41210,AT2G41630,AT2G41970,AT2G44080,AT2G45890,AT3G01730…
GO:BP	establishment of localization	GO:0051234	5.75916e-06	5.23964	2716	3002	452	23012	AT1G01340,AT1G01580,AT1G01910,AT1G02335,AT1G02690,AT1G04760,AT1G05300,AT1G05360,AT1G05500,AT1G06490,AT1G07140,AT1G08100,AT1G08670,AT1G08930,AT1G09070,AT1G09560,AT1G10030,AT1G10385,AT1G10800,AT1G11670,AT1G12150,AT1G12500,AT1G13160,AT1G13210,AT1G14360,AT1G15210,AT1G15460,AT1G16310,AT1G16390,AT1G16510,AT1G17140,AT1G17700,AT1G18200,AT1G18420,AT1G18830,AT1G18880,AT1G19970,AT1G21140,AT1G22570,AT1G22710…
GO:BP	hemicellulose metabolic process	GO:0010410	6.16741e-06	5.2099	114	3002	39	23012	AT1G08990,AT1G11545,AT1G19300,AT1G27930,AT1G28240,AT1G33800,AT1G54940,AT1G71930,AT1G73140,AT1G77130,AT2G15440,AT2G18800,AT2G36870,AT2G37090,AT2G38320,AT2G40320,AT3G44990,AT3G55990,AT3G62720,AT4G03210,AT4G08160,AT4G09990,AT4G25810,AT4G28850,AT4G30270,AT4G30280,AT4G33330,AT4G37800,AT5G01360,AT5G13870,AT5G22940,AT5G49360,AT5G54690,AT5G57530,AT5G57540,AT5G57560,AT5G59290,AT5G62220,AT5G67210
GO:BP	root hair cell development	GO:0080147	6.78851e-06	5.16823	101	3002	36	23012	AT1G01380,AT1G01910,AT1G10480,AT1G12560,AT1G16440,AT1G59870,AT1G63450,AT1G70940,AT1G77110,AT2G26420,AT2G41970,AT2G45890,AT3G01730,AT3G02242,AT3G06810,AT3G20630,AT3G25710,AT3G43960,AT3G53750,AT3G61440,AT4G02270,AT4G14430,AT4G15290,AT4G31600,AT4G34580,AT4G35020,AT4G35987,AT5G05500,AT5G06270,AT5G16910,AT5G27840,AT5G44610,AT5G45420,AT5G56540,AT5G58010,AT5G60660
GO:BP	microtubule-based process	GO:0007017	7.27847e-06	5.13796	237	3002	64	23012	AT1G04820,AT1G09170,AT1G11160,AT1G18370,AT1G18550,AT1G19835,AT1G69230,AT1G72250,AT1G73860,AT1G80350,AT2G18990,AT2G22610,AT2G28620,AT2G36200,AT2G37420,AT2G38160,AT2G47500,AT3G04630,AT3G05330,AT3G06030,AT3G08670,AT3G09840,AT3G10310,AT3G19050,AT3G20150,AT3G20860,AT3G23090,AT3G23670,AT3G44050,AT3G45850,AT3G47690,AT3G58650,AT3G60840,AT4G09550,AT4G14150,AT4G14330,AT4G18570,AT4G21270,AT4G22860,AT4G24170…
GO:BP	response to water	GO:0009415	7.63633e-06	5.11712	429	3002	99	23012	AT1G02205,AT1G02730,AT1G04400,AT1G05260,AT1G05680,AT1G07660,AT1G07820,AT1G08930,AT1G09340,AT1G13740,AT1G15380,AT1G16060,AT1G20450,AT1G22882,AT1G22890,AT1G28520,AT1G31710,AT1G32230,AT1G33560,AT1G36060,AT1G43160,AT1G52400,AT1G54100,AT1G59870,AT1G62660,AT1G62810,AT1G64660,AT1G64670,AT1G69310,AT1G73330,AT1G74520,AT1G78080,AT1G78380,AT2G01830,AT2G05070,AT2G05100,AT2G05520,AT2G15970,AT2G18050,AT2G20880…
GO:BP	pectin metabolic process	GO:0045488	8.41862e-06	5.07476	167	3002	50	23012	AT1G04680,AT1G05310,AT1G11920,AT1G13250,AT1G19300,AT1G23200,AT1G28240,AT1G51630,AT1G53830,AT1G53840,AT1G67750,AT1G78240,AT2G18230,AT2G19150,AT2G26440,AT2G28315,AT2G33570,AT2G43050,AT3G01040,AT3G07010,AT3G07970,AT3G10710,AT3G10720,AT3G21190,AT3G24670,AT3G26610,AT3G27400,AT3G29090,AT3G47400,AT3G49220,AT3G53190,AT4G01220,AT4G01750,AT4G13210,AT4G13710,AT4G22080,AT4G24780,AT5G01360,AT5G04960,AT5G04970…
GO:BP	transport	GO:0006810	9.89631e-06	5.00453	2672	3002	444	23012	AT1G01340,AT1G01580,AT1G01910,AT1G02335,AT1G02690,AT1G04760,AT1G05300,AT1G05360,AT1G05500,AT1G06490,AT1G07140,AT1G08100,AT1G08670,AT1G08930,AT1G09070,AT1G09560,AT1G10030,AT1G10385,AT1G10800,AT1G11670,AT1G12500,AT1G13160,AT1G13210,AT1G14360,AT1G15210,AT1G15460,AT1G16310,AT1G16390,AT1G16510,AT1G17140,AT1G17700,AT1G18200,AT1G18420,AT1G18830,AT1G18880,AT1G19970,AT1G21140,AT1G22570,AT1G22710,AT1G23020…
GO:BP	galacturonan metabolic process	GO:0010393	1.04819e-05	4.97956	168	3002	50	23012	AT1G04680,AT1G05310,AT1G11920,AT1G13250,AT1G19300,AT1G23200,AT1G28240,AT1G51630,AT1G53830,AT1G53840,AT1G67750,AT1G78240,AT2G18230,AT2G19150,AT2G26440,AT2G28315,AT2G33570,AT2G43050,AT3G01040,AT3G07010,AT3G07970,AT3G10710,AT3G10720,AT3G21190,AT3G24670,AT3G26610,AT3G27400,AT3G29090,AT3G47400,AT3G49220,AT3G53190,AT4G01220,AT4G01750,AT4G13210,AT4G13710,AT4G22080,AT4G24780,AT5G01360,AT5G04960,AT5G04970…
GO:BP	response to organic cyclic compound	GO:0014070	1.13737e-05	4.9441	342	3002	83	23012	AT1G02860,AT1G04400,AT1G05560,AT1G08650,AT1G13260,AT1G15380,AT1G16310,AT1G19350,AT1G21270,AT1G21910,AT1G22500,AT1G31710,AT1G35160,AT1G43160,AT1G53130,AT1G53940,AT1G59870,AT1G62810,AT1G63100,AT1G65510,AT1G66180,AT1G66350,AT1G67070,AT1G71830,AT1G71930,AT1G74500,AT1G75750,AT1G78300,AT1G80840,AT2G01520,AT2G01950,AT2G02740,AT2G03760,AT2G05520,AT2G13810,AT2G16390,AT2G17520,AT2G22300,AT2G25000,AT2G29420…
GO:BP	regulation of cyclin-dependent protein serine/threonine kinase activity	GO:0000079	1.18769e-05	4.9253	61	3002	26	23012	AT1G14750,AT1G15570,AT1G20610,AT1G44110,AT1G47210,AT1G70210,AT1G76310,AT1G77390,AT1G80370,AT2G17620,AT2G26760,AT2G27970,AT2G44740,AT3G11520,AT3G50630,AT3G63120,AT4G19600,AT4G34160,AT4G35620,AT5G04470,AT5G06150,AT5G07450,AT5G11300,AT5G25380,AT5G43080,AT5G48820
GO:BP	regulation of cyclin-dependent protein kinase activity	GO:1904029	1.18769e-05	4.9253	61	3002	26	23012	AT1G14750,AT1G15570,AT1G20610,AT1G44110,AT1G47210,AT1G70210,AT1G76310,AT1G77390,AT1G80370,AT2G17620,AT2G26760,AT2G27970,AT2G44740,AT3G11520,AT3G50630,AT3G63120,AT4G19600,AT4G34160,AT4G35620,AT5G04470,AT5G06150,AT5G07450,AT5G11300,AT5G25380,AT5G43080,AT5G48820
GO:BP	developmental growth involved in morphogenesis	GO:0060560	1.28988e-05	4.88945	354	3002	85	23012	AT1G01910,AT1G08660,AT1G09080,AT1G10480,AT1G11160,AT1G12040,AT1G12560,AT1G21210,AT1G21270,AT1G27380,AT1G34350,AT1G50430,AT1G50890,AT1G63450,AT1G70940,AT1G75750,AT1G77110,AT1G79620,AT1G79860,AT2G05520,AT2G19690,AT2G19760,AT2G26420,AT2G28620,AT2G35650,AT2G37540,AT2G41210,AT2G41630,AT2G41970,AT2G45890,AT3G01730,AT3G06810,AT3G07880,AT3G09840,AT3G18000,AT3G19820,AT3G20630,AT3G21220,AT3G22200,AT3G23090…
GO:BP	cell cycle	GO:0007049	1.33028e-05	4.87606	688	3002	142	23012	AT1G01370,AT1G01690,AT1G02730,AT1G04030,AT1G04820,AT1G07370,AT1G09450,AT1G14750,AT1G15570,AT1G16330,AT1G18370,AT1G20610,AT1G20750,AT1G20930,AT1G30690,AT1G34355,AT1G44110,AT1G44900,AT1G47200,AT1G47210,AT1G49910,AT1G50490,AT1G53140,AT1G63100,AT1G63990,AT1G67180,AT1G69690,AT1G70210,AT1G71830,AT1G76310,AT1G76540,AT1G77390,AT1G80370,AT2G07690,AT2G17620,AT2G26760,AT2G27970,AT2G28150,AT2G28620,AT2G31270…
GO:BP	regulation of biological process	GO:0050789	1.4379e-05	4.84227	5936	3002	901	23012	AT1G01260,AT1G01380,AT1G01720,AT1G02335,AT1G02340,AT1G02660,AT1G02860,AT1G02900,AT1G03040,AT1G03680,AT1G03760,AT1G03850,AT1G03920,AT1G04050,AT1G04170,AT1G04250,AT1G04400,AT1G04550,AT1G04700,AT1G05630,AT1G05640,AT1G06450,AT1G06490,AT1G06923,AT1G07260,AT1G07370,AT1G07530,AT1G07710,AT1G08320,AT1G08340,AT1G08650,AT1G08830,AT1G09000,AT1G09080,AT1G09340,AT1G09450,AT1G09540,AT1G09560,AT1G09750,AT1G10030…
GO:BP	post-embryonic root development	GO:0048528	1.50567e-05	4.82227	155	3002	47	23012	AT1G08100,AT1G12820,AT1G13260,AT1G15570,AT1G21210,AT1G21410,AT1G32230,AT1G47200,AT1G49430,AT1G56010,AT1G59870,AT1G64670,AT1G69935,AT1G77110,AT1G77690,AT2G19760,AT2G22670,AT2G30340,AT2G31085,AT2G33680,AT2G34680,AT2G38120,AT3G02242,AT3G05090,AT3G18000,AT3G20860,AT3G22400,AT3G22942,AT3G24300,AT3G30260,AT3G53180,AT4G14550,AT4G24670,AT4G26760,AT4G31600,AT4G33495,AT4G37070,AT4G37295,AT5G03730,AT5G25890…
GO:BP	response to water deprivation	GO:0009414	1.65768e-05	4.7805	418	3002	96	23012	AT1G02205,AT1G02730,AT1G04400,AT1G05260,AT1G05680,AT1G07660,AT1G07820,AT1G08930,AT1G09340,AT1G13740,AT1G15380,AT1G16060,AT1G20450,AT1G22882,AT1G22890,AT1G28520,AT1G31710,AT1G32230,AT1G33560,AT1G43160,AT1G52400,AT1G54100,AT1G59870,AT1G62660,AT1G62810,AT1G64660,AT1G64670,AT1G69310,AT1G73330,AT1G74520,AT1G78080,AT1G78380,AT2G01830,AT2G05070,AT2G05100,AT2G05520,AT2G15970,AT2G18050,AT2G20880,AT2G27470…
GO:BP	cellular response to decreased oxygen levels	GO:0036294	1.75235e-05	4.75638	242	3002	64	23012	AT1G01720,AT1G09070,AT1G10140,AT1G13260,AT1G13300,AT1G15010,AT1G22220,AT1G23710,AT1G26270,AT1G30720,AT1G32928,AT1G33055,AT1G35140,AT1G53840,AT1G63090,AT1G66180,AT1G68690,AT1G69890,AT1G72900,AT1G73500,AT1G76560,AT1G76600,AT2G14247,AT2G16060,AT2G25735,AT2G26560,AT2G36220,AT2G36800,AT2G40000,AT2G40140,AT2G41010,AT2G41100,AT3G10020,AT3G13310,AT3G46080,AT3G50440,AT3G56880,AT4G16660,AT4G19520,AT4G19880…
GO:BP	cellular response to oxygen levels	GO:0071453	1.75235e-05	4.75638	242	3002	64	23012	AT1G01720,AT1G09070,AT1G10140,AT1G13260,AT1G13300,AT1G15010,AT1G22220,AT1G23710,AT1G26270,AT1G30720,AT1G32928,AT1G33055,AT1G35140,AT1G53840,AT1G63090,AT1G66180,AT1G68690,AT1G69890,AT1G72900,AT1G73500,AT1G76560,AT1G76600,AT2G14247,AT2G16060,AT2G25735,AT2G26560,AT2G36220,AT2G36800,AT2G40000,AT2G40140,AT2G41010,AT2G41100,AT3G10020,AT3G13310,AT3G46080,AT3G50440,AT3G56880,AT4G16660,AT4G19520,AT4G19880…
GO:BP	small molecule metabolic process	GO:0044281	1.77915e-05	4.74979	1833	3002	319	23012	AT1G02500,AT1G02860,AT1G04400,AT1G05560,AT1G05630,AT1G05680,AT1G06080,AT1G06550,AT1G06570,AT1G08100,AT1G08250,AT1G08510,AT1G09340,AT1G09350,AT1G10170,AT1G10670,AT1G11860,AT1G12000,AT1G12780,AT1G13700,AT1G14230,AT1G14240,AT1G15040,AT1G15380,AT1G16060,AT1G18870,AT1G19140,AT1G20560,AT1G20950,AT1G21100,AT1G22170,AT1G22640,AT1G24340,AT1G26360,AT1G26570,AT1G27130,AT1G31070,AT1G31230,AT1G36160,AT1G42970…
GO:BP	regulation of protein serine/threonine kinase activity	GO:0071900	1.78335e-05	4.74876	70	3002	28	23012	AT1G14750,AT1G15570,AT1G20610,AT1G44110,AT1G47210,AT1G70210,AT1G76310,AT1G77390,AT1G80370,AT2G04550,AT2G17620,AT2G26760,AT2G27970,AT2G44740,AT3G11520,AT3G50630,AT3G63120,AT4G17270,AT4G19600,AT4G34160,AT4G35620,AT5G04470,AT5G06150,AT5G07450,AT5G11300,AT5G25380,AT5G43080,AT5G48820
GO:BP	regulation of molecular function	GO:0065009	1.82764e-05	4.73811	667	3002	138	23012	AT1G01700,AT1G02300,AT1G03680,AT1G03760,AT1G05640,AT1G07140,AT1G07370,AT1G07710,AT1G08340,AT1G14750,AT1G14890,AT1G15570,AT1G20610,AT1G23200,AT1G24020,AT1G28280,AT1G44110,AT1G44900,AT1G47210,AT1G48870,AT1G53830,AT1G53840,AT1G62770,AT1G70210,AT1G72060,AT1G73330,AT1G73500,AT1G73580,AT1G75990,AT1G76310,AT1G77390,AT1G79860,AT1G80370,AT2G01470,AT2G04550,AT2G16390,AT2G17290,AT2G17620,AT2G25240,AT2G25770…
GO:BP	lateral root development	GO:0048527	2.10565e-05	4.67661	142	3002	44	23012	AT1G08100,AT1G12820,AT1G13260,AT1G15570,AT1G21210,AT1G21410,AT1G32230,AT1G47200,AT1G49430,AT1G56010,AT1G59870,AT1G64670,AT1G69935,AT1G77110,AT1G77690,AT2G19760,AT2G22670,AT2G30340,AT2G31085,AT2G33680,AT2G34680,AT2G38120,AT3G02242,AT3G05090,AT3G20860,AT3G22400,AT3G22942,AT3G24300,AT3G30260,AT3G53180,AT4G14550,AT4G24670,AT4G31600,AT4G33495,AT4G37070,AT4G37295,AT5G25890,AT5G26930,AT5G39610,AT5G40770…
GO:BP	cellular response to hypoxia	GO:0071456	3.06507e-05	4.51356	240	3002	63	23012	AT1G01720,AT1G09070,AT1G10140,AT1G13260,AT1G13300,AT1G15010,AT1G22220,AT1G23710,AT1G26270,AT1G30720,AT1G32928,AT1G33055,AT1G35140,AT1G53840,AT1G63090,AT1G66180,AT1G68690,AT1G69890,AT1G72900,AT1G73500,AT1G76600,AT2G14247,AT2G16060,AT2G25735,AT2G26560,AT2G36220,AT2G36800,AT2G40000,AT2G40140,AT2G41010,AT2G41100,AT3G10020,AT3G13310,AT3G46080,AT3G50440,AT3G56880,AT4G16660,AT4G19520,AT4G19880,AT4G20860…
GO:BP	carbohydrate biosynthetic process	GO:0016051	3.2247e-05	4.49151	372	3002	87	23012	AT1G02730,AT1G06490,AT1G08990,AT1G10670,AT1G12780,AT1G13250,AT1G16860,AT1G19300,AT1G22170,AT1G27930,AT1G28240,AT1G32060,AT1G32900,AT1G33800,AT1G42970,AT1G51630,AT1G54940,AT1G63450,AT1G67070,AT1G67090,AT1G70290,AT1G73140,AT1G76560,AT1G77130,AT1G78090,AT1G78240,AT1G78580,AT2G15440,AT2G21170,AT2G22190,AT2G22240,AT2G25450,AT2G28315,AT2G33570,AT2G35840,AT2G36390,AT2G37090,AT2G37680,AT2G38320,AT2G39770…
GO:BP	mitotic cell cycle process	GO:1903047	3.36372e-05	4.47318	230	3002	61	23012	AT1G02730,AT1G14750,AT1G15570,AT1G20610,AT1G20930,AT1G44110,AT1G44900,AT1G47210,AT1G49910,AT1G50490,AT1G70210,AT1G76310,AT1G76540,AT1G77390,AT1G80370,AT2G17620,AT2G26760,AT2G28620,AT2G32590,AT2G33560,AT3G05330,AT3G05480,AT3G09840,AT3G11520,AT3G18730,AT3G19050,AT3G25980,AT3G44050,AT3G54180,AT3G55340,AT3G57060,AT3G57860,AT3G58650,AT4G09550,AT4G15290,AT4G18780,AT4G22860,AT4G32830,AT4G34160,AT4G35620…
GO:BP	cell growth	GO:0016049	3.58104e-05	4.44599	430	3002	97	23012	AT1G01910,AT1G02900,AT1G08660,AT1G09080,AT1G10480,AT1G11160,AT1G12040,AT1G12560,AT1G21210,AT1G21270,AT1G27380,AT1G34350,AT1G48100,AT1G50430,AT1G50890,AT1G50930,AT1G63450,AT1G70370,AT1G70710,AT1G70940,AT1G75750,AT1G77110,AT1G79620,AT1G79860,AT1G80350,AT2G04550,AT2G05520,AT2G19690,AT2G19760,AT2G26420,AT2G28620,AT2G35650,AT2G37540,AT2G41210,AT2G41630,AT2G41970,AT2G44080,AT2G45890,AT3G01730,AT3G06810…
GO:BP	cell wall modification	GO:0042545	4.20948e-05	4.37577	145	3002	44	23012	AT1G05310,AT1G19300,AT1G19900,AT1G23200,AT1G27930,AT1G34350,AT1G48100,AT1G53830,AT1G53840,AT1G59870,AT1G66340,AT1G70370,AT1G70710,AT1G73360,AT2G18230,AT2G18800,AT2G19150,AT2G26440,AT2G27370,AT2G31220,AT2G34070,AT2G36100,AT2G41210,AT2G43050,AT3G07970,AT3G10710,AT3G10720,AT3G11550,AT3G29090,AT3G47400,AT3G49220,AT4G26850,AT4G30270,AT4G34980,AT4G39010,AT5G01360,AT5G04960,AT5G04970,AT5G06200,AT5G09760…
GO:BP	regulation of biological quality	GO:0065008	4.22059e-05	4.37463	950	3002	182	23012	AT1G01580,AT1G04170,AT1G04180,AT1G04400,AT1G04610,AT1G05630,AT1G05680,AT1G06450,AT1G10030,AT1G10670,AT1G12520,AT1G12740,AT1G13210,AT1G14120,AT1G14740,AT1G15460,AT1G16510,AT1G17140,AT1G18070,AT1G20340,AT1G20450,AT1G21140,AT1G21270,AT1G22990,AT1G23080,AT1G25250,AT1G30690,AT1G32450,AT1G50430,AT1G50575,AT1G52400,AT1G53700,AT1G54200,AT1G56060,AT1G59870,AT1G60080,AT1G64060,AT1G64780,AT1G65970,AT1G66340…
GO:BP	cell division	GO:0051301	4.87263e-05	4.31224	450	3002	100	23012	AT1G01370,AT1G02730,AT1G14750,AT1G15570,AT1G16330,AT1G18370,AT1G20610,AT1G21410,AT1G30690,AT1G44110,AT1G47210,AT1G49910,AT1G53140,AT1G66340,AT1G69690,AT1G70210,AT1G76310,AT1G77390,AT1G78580,AT1G80370,AT2G17620,AT2G26760,AT2G27970,AT2G28150,AT2G28350,AT2G28620,AT2G32590,AT2G34680,AT2G35190,AT2G44740,AT2G47420,AT2G47990,AT3G02242,AT3G05330,AT3G09840,AT3G11520,AT3G14190,AT3G18730,AT3G19050,AT3G21220…
GO:BP	organic acid metabolic process	GO:0006082	5.33562e-05	4.27281	1223	3002	224	23012	AT1G02860,AT1G05560,AT1G05680,AT1G06080,AT1G06550,AT1G06570,AT1G08100,AT1G08250,AT1G08510,AT1G10170,AT1G10670,AT1G11860,AT1G12000,AT1G15040,AT1G16060,AT1G18870,AT1G20560,AT1G20950,AT1G21100,AT1G22170,AT1G22640,AT1G26360,AT1G26570,AT1G27130,AT1G31230,AT1G36160,AT1G48420,AT1G48470,AT1G49430,AT1G52400,AT1G53130,AT1G53520,AT1G59870,AT1G62560,AT1G62640,AT1G63660,AT1G64660,AT1G64670,AT1G65930,AT1G66230…
GO:BP	response to decreased oxygen levels	GO:0036293	6.03766e-05	4.21913	271	3002	68	23012	AT1G01720,AT1G09070,AT1G10140,AT1G13260,AT1G13300,AT1G15010,AT1G22220,AT1G23710,AT1G26270,AT1G30720,AT1G32928,AT1G33055,AT1G35140,AT1G53840,AT1G63090,AT1G66180,AT1G68690,AT1G69890,AT1G72330,AT1G72900,AT1G73500,AT1G76560,AT1G76600,AT2G14247,AT2G16060,AT2G25735,AT2G26560,AT2G36220,AT2G36800,AT2G40000,AT2G40140,AT2G41010,AT2G41100,AT3G10020,AT3G13310,AT3G28910,AT3G46080,AT3G50440,AT3G56880,AT4G16660…
GO:BP	response to oxygen levels	GO:0070482	7.03745e-05	4.15258	272	3002	68	23012	AT1G01720,AT1G09070,AT1G10140,AT1G13260,AT1G13300,AT1G15010,AT1G22220,AT1G23710,AT1G26270,AT1G30720,AT1G32928,AT1G33055,AT1G35140,AT1G53840,AT1G63090,AT1G66180,AT1G68690,AT1G69890,AT1G72330,AT1G72900,AT1G73500,AT1G76560,AT1G76600,AT2G14247,AT2G16060,AT2G25735,AT2G26560,AT2G36220,AT2G36800,AT2G40000,AT2G40140,AT2G41010,AT2G41100,AT3G10020,AT3G13310,AT3G28910,AT3G46080,AT3G50440,AT3G56880,AT4G16660…
GO:BP	response to hypoxia	GO:0001666	7.52211e-05	4.12366	267	3002	67	23012	AT1G01720,AT1G09070,AT1G10140,AT1G13260,AT1G13300,AT1G15010,AT1G22220,AT1G23710,AT1G26270,AT1G30720,AT1G32928,AT1G33055,AT1G35140,AT1G53840,AT1G63090,AT1G66180,AT1G68690,AT1G69890,AT1G72330,AT1G72900,AT1G73500,AT1G76600,AT2G14247,AT2G16060,AT2G25735,AT2G26560,AT2G36220,AT2G36800,AT2G40000,AT2G40140,AT2G41010,AT2G41100,AT3G10020,AT3G13310,AT3G28910,AT3G46080,AT3G50440,AT3G56880,AT4G16660,AT4G19520…
GO:BP	carboxylic acid biosynthetic process	GO:0046394	8.7257e-05	4.0592	544	3002	115	23012	AT1G02860,AT1G06080,AT1G08250,AT1G08510,AT1G10170,AT1G10670,AT1G16060,AT1G18870,AT1G22640,AT1G26570,AT1G31230,AT1G36160,AT1G48470,AT1G53130,AT1G62640,AT1G64660,AT1G64670,AT1G66230,AT1G67070,AT1G67730,AT1G70480,AT1G73680,AT2G05830,AT2G13810,AT2G17265,AT2G18950,AT2G24300,AT2G26300,AT2G26560,AT2G27820,AT2G29980,AT2G32720,AT2G33150,AT2G36230,AT2G38010,AT2G39770,AT2G44160,AT2G46750,AT2G46760,AT3G02870…
GO:BP	regulation of protein kinase activity	GO:0045859	9.02569e-05	4.04452	92	3002	32	23012	AT1G14750,AT1G15570,AT1G20610,AT1G44110,AT1G47210,AT1G70210,AT1G73500,AT1G76310,AT1G77390,AT1G80370,AT2G04550,AT2G17620,AT2G26760,AT2G27970,AT2G44740,AT3G11520,AT3G50630,AT3G63120,AT4G17270,AT4G19600,AT4G22860,AT4G34160,AT4G35620,AT5G04470,AT5G06150,AT5G07450,AT5G11300,AT5G15510,AT5G25380,AT5G37478,AT5G43080,AT5G48820
GO:BP	oxoacid metabolic process	GO:0043436	9.80448e-05	4.00858	1180	3002	216	23012	AT1G02860,AT1G05560,AT1G05680,AT1G06080,AT1G06550,AT1G06570,AT1G08100,AT1G08250,AT1G08510,AT1G10170,AT1G10670,AT1G11860,AT1G12000,AT1G15040,AT1G16060,AT1G18870,AT1G20560,AT1G20950,AT1G21100,AT1G22170,AT1G22640,AT1G26360,AT1G26570,AT1G27130,AT1G31230,AT1G36160,AT1G48420,AT1G48470,AT1G49430,AT1G52400,AT1G53130,AT1G53520,AT1G59870,AT1G62560,AT1G62640,AT1G63660,AT1G64660,AT1G64670,AT1G65930,AT1G66230…
GO:BP	small molecule biosynthetic process	GO:0044283	9.9274e-05	4.00316	747	3002	148	23012	AT1G02860,AT1G06080,AT1G08250,AT1G08510,AT1G10170,AT1G10670,AT1G16060,AT1G18870,AT1G19140,AT1G22170,AT1G22640,AT1G24340,AT1G26570,AT1G31230,AT1G36160,AT1G48470,AT1G50430,AT1G53130,AT1G54570,AT1G59171,AT1G62640,AT1G64660,AT1G64670,AT1G66230,AT1G67070,AT1G67730,AT1G70480,AT1G73680,AT1G74470,AT1G78510,AT1G79790,AT1G80050,AT1G80340,AT2G05830,AT2G13810,AT2G17265,AT2G18950,AT2G21170,AT2G22240,AT2G24300…
GO:BP	cellular response to oxygen-containing compound	GO:1901701	0.000100169	3.99927	797	3002	156	23012	AT1G01720,AT1G02340,AT1G05630,AT1G05680,AT1G08100,AT1G08830,AT1G09340,AT1G10480,AT1G10560,AT1G12010,AT1G12240,AT1G12520,AT1G12820,AT1G13300,AT1G15100,AT1G15380,AT1G16310,AT1G18890,AT1G19350,AT1G24020,AT1G25540,AT1G32230,AT1G32540,AT1G35160,AT1G52400,AT1G53130,AT1G59870,AT1G61380,AT1G62660,AT1G62810,AT1G63100,AT1G63650,AT1G64060,AT1G64660,AT1G66340,AT1G66350,AT1G69935,AT1G71830,AT1G73580,AT1G74500…
GO:BP	mitotic cell cycle	GO:0000278	0.000102958	3.98734	291	3002	71	23012	AT1G02730,AT1G04820,AT1G09450,AT1G14750,AT1G15570,AT1G20610,AT1G20930,AT1G44110,AT1G44900,AT1G47200,AT1G47210,AT1G49910,AT1G50490,AT1G63100,AT1G70210,AT1G76310,AT1G76540,AT1G77390,AT1G80370,AT2G17620,AT2G26760,AT2G27970,AT2G28620,AT2G31270,AT2G32590,AT2G33560,AT3G05330,AT3G05480,AT3G09840,AT3G11520,AT3G14190,AT3G18730,AT3G19050,AT3G25980,AT3G44050,AT3G54180,AT3G54710,AT3G55340,AT3G57060,AT3G57860…
GO:BP	anatomical structure maturation	GO:0071695	0.000108044	3.9664	221	3002	58	23012	AT1G01380,AT1G01910,AT1G10480,AT1G12560,AT1G16440,AT1G27740,AT1G59870,AT1G63450,AT1G66340,AT1G66350,AT1G70940,AT1G77110,AT2G03720,AT2G26420,AT2G33790,AT2G38120,AT2G41945,AT2G41970,AT2G45890,AT3G01730,AT3G02242,AT3G03450,AT3G06810,AT3G10420,AT3G20630,AT3G25710,AT3G43960,AT3G47860,AT3G49700,AT3G53750,AT3G61440,AT3G63210,AT4G01060,AT4G02270,AT4G08040,AT4G14430,AT4G15290,AT4G18640,AT4G26690,AT4G31600…
GO:BP	organic hydroxy compound metabolic process	GO:1901615	0.000108306	3.96535	393	3002	89	23012	AT1G02205,AT1G02860,AT1G05630,AT1G10030,AT1G10170,AT1G12740,AT1G18870,AT1G26360,AT1G30530,AT1G50430,AT1G52400,AT1G53130,AT1G54570,AT1G59171,AT1G64670,AT1G65580,AT1G65930,AT1G66970,AT1G69240,AT1G74470,AT2G03760,AT2G18790,AT2G18950,AT2G19450,AT2G21170,AT2G22240,AT2G22830,AT2G24300,AT2G26260,AT2G32010,AT2G36800,AT2G37700,AT2G38010,AT2G38700,AT2G41010,AT2G42850,AT2G43420,AT2G43820,AT2G45400,AT2G47460…
GO:BP	regulation of cellular process	GO:0050794	0.000110448	3.95684	5130	3002	782	23012	AT1G01260,AT1G01380,AT1G01720,AT1G02340,AT1G02860,AT1G02900,AT1G03040,AT1G03760,AT1G03850,AT1G03920,AT1G04170,AT1G04250,AT1G04400,AT1G04550,AT1G04700,AT1G05630,AT1G05640,AT1G06450,AT1G06923,AT1G07370,AT1G07530,AT1G07710,AT1G08320,AT1G08340,AT1G08650,AT1G09000,AT1G09080,AT1G09340,AT1G09450,AT1G09540,AT1G09750,AT1G10170,AT1G10480,AT1G10560,AT1G10610,AT1G10940,AT1G11130,AT1G11160,AT1G12240,AT1G12260…
GO:BP	photosynthesis, light harvesting in photosystem I	GO:0009768	0.000114558	3.94098	23	3002	14	23012	AT1G08380,AT1G15820,AT1G29930,AT1G61520,AT2G05070,AT2G05100,AT2G34420,AT3G08940,AT3G47470,AT3G54890,AT3G61470,AT4G10340,AT5G01530,AT5G54270
GO:BP	organic acid biosynthetic process	GO:0016053	0.000116759	3.93271	577	3002	120	23012	AT1G02860,AT1G06080,AT1G08250,AT1G08510,AT1G10170,AT1G10670,AT1G16060,AT1G18870,AT1G22640,AT1G26570,AT1G31230,AT1G36160,AT1G48470,AT1G53130,AT1G62640,AT1G64660,AT1G64670,AT1G66230,AT1G67070,AT1G67730,AT1G70480,AT1G73680,AT1G80340,AT2G05830,AT2G13810,AT2G17265,AT2G18950,AT2G24300,AT2G26300,AT2G26560,AT2G27820,AT2G29980,AT2G32720,AT2G33150,AT2G36230,AT2G38010,AT2G39770,AT2G44160,AT2G46590,AT2G46750…
GO:BP	phenylpropanoid metabolic process	GO:0009698	0.000125162	3.90253	170	3002	48	23012	AT1G05240,AT1G18140,AT1G22640,AT1G32100,AT1G33800,AT1G59870,AT1G61590,AT1G64670,AT1G66230,AT1G72680,AT2G21100,AT2G29130,AT2G30210,AT2G38080,AT2G39430,AT3G09220,AT3G10340,AT3G11430,AT3G11670,AT3G12900,AT3G19820,AT3G24020,AT3G44540,AT3G44550,AT3G53510,AT3G55230,AT4G11190,AT4G11210,AT4G23690,AT4G26220,AT4G37970,AT4G39330,AT5G01190,AT5G03260,AT5G05390,AT5G07130,AT5G10280,AT5G13580,AT5G16600,AT5G20230…
GO:BP	regulation of kinase activity	GO:0043549	0.000159971	3.79596	94	3002	32	23012	AT1G14750,AT1G15570,AT1G20610,AT1G44110,AT1G47210,AT1G70210,AT1G73500,AT1G76310,AT1G77390,AT1G80370,AT2G04550,AT2G17620,AT2G26760,AT2G27970,AT2G44740,AT3G11520,AT3G50630,AT3G63120,AT4G17270,AT4G19600,AT4G22860,AT4G34160,AT4G35620,AT5G04470,AT5G06150,AT5G07450,AT5G11300,AT5G15510,AT5G25380,AT5G37478,AT5G43080,AT5G48820
GO:BP	developmental maturation	GO:0021700	0.00017611	3.75422	240	3002	61	23012	AT1G01380,AT1G01910,AT1G10480,AT1G12560,AT1G12820,AT1G16440,AT1G27740,AT1G59870,AT1G63450,AT1G66340,AT1G66350,AT1G70940,AT1G71830,AT1G77110,AT2G03720,AT2G26420,AT2G33790,AT2G36270,AT2G38120,AT2G41945,AT2G41970,AT2G45890,AT3G01730,AT3G02242,AT3G03450,AT3G06810,AT3G10420,AT3G20630,AT3G25710,AT3G43960,AT3G47860,AT3G49700,AT3G53750,AT3G61440,AT3G63210,AT4G01060,AT4G02270,AT4G08040,AT4G14430,AT4G15290…
GO:BP	regulation of protein phosphorylation	GO:0001932	0.000201229	3.69631	104	3002	34	23012	AT1G14750,AT1G15570,AT1G20610,AT1G44110,AT1G47210,AT1G70210,AT1G73500,AT1G76310,AT1G77390,AT1G80370,AT2G04550,AT2G17620,AT2G26760,AT2G27970,AT2G44740,AT3G11520,AT3G50630,AT3G63120,AT4G17270,AT4G19600,AT4G22860,AT4G34160,AT4G35620,AT4G38740,AT5G04470,AT5G06150,AT5G07450,AT5G10480,AT5G11300,AT5G15510,AT5G25380,AT5G37478,AT5G43080,AT5G48820
GO:BP	localization	GO:0051179	0.000217376	3.66279	2949	3002	474	23012	AT1G01340,AT1G01580,AT1G01910,AT1G02335,AT1G02690,AT1G04760,AT1G05300,AT1G05360,AT1G05500,AT1G06490,AT1G07140,AT1G08100,AT1G08670,AT1G08930,AT1G09070,AT1G09560,AT1G10030,AT1G10385,AT1G10800,AT1G11670,AT1G12150,AT1G12500,AT1G13160,AT1G13210,AT1G14360,AT1G15210,AT1G15460,AT1G16310,AT1G16390,AT1G16510,AT1G17140,AT1G17700,AT1G18200,AT1G18420,AT1G18830,AT1G18880,AT1G19970,AT1G21140,AT1G21810,AT1G22290…
GO:BP	response to abscisic acid	GO:0009737	0.000227556	3.64291	590	3002	121	23012	AT1G01720,AT1G02340,AT1G05630,AT1G05680,AT1G08930,AT1G09310,AT1G10560,AT1G12240,AT1G13300,AT1G13740,AT1G15100,AT1G15380,AT1G16060,AT1G16310,AT1G18890,AT1G20450,AT1G20630,AT1G24020,AT1G24120,AT1G31710,AT1G43160,AT1G52400,AT1G54100,AT1G56580,AT1G62660,AT1G62810,AT1G64060,AT1G64670,AT1G66340,AT1G66350,AT1G69935,AT1G71930,AT1G73580,AT1G74520,AT1G75750,AT2G04550,AT2G05070,AT2G05100,AT2G05520,AT2G15970…
GO:BP	cellular lipid metabolic process	GO:0044255	0.000233073	3.63251	820	3002	158	23012	AT1G01610,AT1G05630,AT1G06080,AT1G06520,AT1G08510,AT1G10670,AT1G16060,AT1G20560,AT1G26270,AT1G31950,AT1G36160,AT1G49430,AT1G51260,AT1G52400,AT1G53130,AT1G53520,AT1G54570,AT1G60890,AT1G62640,AT1G63050,AT1G64670,AT1G65580,AT1G66020,AT1G67730,AT1G73680,AT1G77590,AT1G78510,AT1G78950,AT1G78970,AT1G80340,AT2G03890,AT2G18620,AT2G18640,AT2G18790,AT2G18950,AT2G19450,AT2G19690,AT2G21170,AT2G22240,AT2G26420…
GO:BP	lipid biosynthetic process	GO:0008610	0.000262755	3.58045	690	3002	137	23012	AT1G01610,AT1G02205,AT1G06080,AT1G06520,AT1G08510,AT1G10030,AT1G10670,AT1G12740,AT1G16060,AT1G26270,AT1G31950,AT1G36160,AT1G49430,AT1G50430,AT1G51260,AT1G53130,AT1G54570,AT1G60890,AT1G62640,AT1G63050,AT1G64670,AT1G66020,AT1G67730,AT1G70480,AT1G73680,AT1G78510,AT1G78950,AT1G78970,AT1G80340,AT2G03890,AT2G18620,AT2G18640,AT2G18950,AT2G19450,AT2G22240,AT2G22830,AT2G26260,AT2G26420,AT2G29980,AT2G32720…
GO:BP	photosynthesis	GO:0015979	0.000264935	3.57686	281	3002	68	23012	AT1G03130,AT1G03630,AT1G06680,AT1G08380,AT1G12000,AT1G15820,AT1G20950,AT1G29930,AT1G30380,AT1G30850,AT1G31330,AT1G32060,AT1G42970,AT1G44575,AT1G52230,AT1G60950,AT1G61520,AT1G67090,AT1G67740,AT1G74470,AT1G75690,AT1G76560,AT1G79040,AT2G01590,AT2G05070,AT2G05100,AT2G06520,AT2G18790,AT2G20260,AT2G21170,AT2G30570,AT2G34420,AT2G40300,AT2G46820,AT3G01500,AT3G08940,AT3G11670,AT3G16140,AT3G16250,AT3G21055…
GO:BP	response to alcohol	GO:0097305	0.000298392	3.52521	599	3002	122	23012	AT1G01720,AT1G02340,AT1G05630,AT1G05680,AT1G08650,AT1G08930,AT1G09310,AT1G10560,AT1G12240,AT1G13300,AT1G13740,AT1G15100,AT1G15380,AT1G16060,AT1G16310,AT1G18890,AT1G20450,AT1G20630,AT1G24020,AT1G24120,AT1G31710,AT1G43160,AT1G52400,AT1G54100,AT1G56580,AT1G62660,AT1G62810,AT1G64060,AT1G64670,AT1G66340,AT1G66350,AT1G69935,AT1G71930,AT1G73580,AT1G74520,AT1G75750,AT2G04550,AT2G05070,AT2G05100,AT2G05520…
GO:BP	xylan biosynthetic process	GO:0045492	0.000313108	3.50431	38	3002	18	23012	AT1G08990,AT1G19300,AT1G27930,AT1G33800,AT1G54940,AT1G73140,AT1G77130,AT2G15440,AT2G37090,AT2G38320,AT3G55990,AT4G09990,AT4G33330,AT5G01360,AT5G22940,AT5G54690,AT5G59290,AT5G67210
GO:BP	post-embryonic plant organ development	GO:0090696	0.000321495	3.49283	201	3002	53	23012	AT1G08100,AT1G12820,AT1G13260,AT1G15570,AT1G21210,AT1G21410,AT1G25250,AT1G32230,AT1G47200,AT1G49430,AT1G56010,AT1G59870,AT1G64670,AT1G69935,AT1G77110,AT1G77690,AT2G19760,AT2G22670,AT2G30340,AT2G31085,AT2G33680,AT2G34680,AT2G38120,AT3G02242,AT3G05090,AT3G07050,AT3G18000,AT3G20860,AT3G22400,AT3G22942,AT3G24300,AT3G30260,AT3G53180,AT4G14550,AT4G18570,AT4G20910,AT4G24670,AT4G26760,AT4G31600,AT4G33495…
GO:BP	cell differentiation	GO:0030154	0.000416965	3.3799	758	3002	147	23012	AT1G01380,AT1G01910,AT1G06520,AT1G08590,AT1G08660,AT1G09080,AT1G10480,AT1G11130,AT1G12040,AT1G12260,AT1G12560,AT1G14740,AT1G15570,AT1G16440,AT1G19835,AT1G20850,AT1G22910,AT1G25540,AT1G27380,AT1G27740,AT1G33470,AT1G34350,AT1G43790,AT1G55170,AT1G56580,AT1G59870,AT1G63450,AT1G63650,AT1G64690,AT1G66230,AT1G66350,AT1G67170,AT1G70940,AT1G71930,AT1G73360,AT1G77110,AT1G78080,AT1G79860,AT1G80350,AT2G03720…
GO:BP	cell wall macromolecule biosynthetic process	GO:0044038	0.000425033	3.37158	93	3002	31	23012	AT1G08990,AT1G19300,AT1G27930,AT1G33800,AT1G51630,AT1G54940,AT1G73140,AT1G77130,AT1G78240,AT2G15440,AT2G37090,AT2G38320,AT2G39770,AT3G21190,AT3G29810,AT3G55990,AT3G62720,AT4G01220,AT4G01750,AT4G09990,AT4G33330,AT5G01360,AT5G06610,AT5G15630,AT5G22940,AT5G41040,AT5G54690,AT5G59290,AT5G60950,AT5G62220,AT5G67210
GO:BP	cellular component macromolecule biosynthetic process	GO:0070589	0.000425033	3.37158	93	3002	31	23012	AT1G08990,AT1G19300,AT1G27930,AT1G33800,AT1G51630,AT1G54940,AT1G73140,AT1G77130,AT1G78240,AT2G15440,AT2G37090,AT2G38320,AT2G39770,AT3G21190,AT3G29810,AT3G55990,AT3G62720,AT4G01220,AT4G01750,AT4G09990,AT4G33330,AT5G01360,AT5G06610,AT5G15630,AT5G22940,AT5G41040,AT5G54690,AT5G59290,AT5G60950,AT5G62220,AT5G67210
GO:BP	regulation of catalytic activity	GO:0050790	0.00048767	3.31187	629	3002	126	23012	AT1G01700,AT1G02300,AT1G03680,AT1G03760,AT1G05640,AT1G07140,AT1G07370,AT1G07710,AT1G08340,AT1G14750,AT1G14890,AT1G15570,AT1G20610,AT1G23200,AT1G24020,AT1G44110,AT1G44900,AT1G47210,AT1G48870,AT1G53830,AT1G53840,AT1G62770,AT1G70210,AT1G72060,AT1G73330,AT1G73500,AT1G73580,AT1G75990,AT1G76310,AT1G77390,AT1G79860,AT1G80370,AT2G01470,AT2G04550,AT2G17620,AT2G25240,AT2G25770,AT2G26040,AT2G26300,AT2G26390…
GO:BP	cell wall polysaccharide biosynthetic process	GO:0070592	0.000495638	3.30484	89	3002	30	23012	AT1G08990,AT1G19300,AT1G27930,AT1G33800,AT1G51630,AT1G54940,AT1G73140,AT1G77130,AT1G78240,AT2G15440,AT2G37090,AT2G38320,AT3G21190,AT3G29810,AT3G55990,AT3G62720,AT4G01220,AT4G01750,AT4G09990,AT4G33330,AT5G01360,AT5G06610,AT5G15630,AT5G22940,AT5G41040,AT5G54690,AT5G59290,AT5G60950,AT5G62220,AT5G67210
GO:BP	cell morphogenesis	GO:0000902	0.000575127	3.24024	425	3002	92	23012	AT1G06490,AT1G08660,AT1G09080,AT1G10480,AT1G11130,AT1G11160,AT1G12040,AT1G19835,AT1G21210,AT1G21270,AT1G25540,AT1G27380,AT1G27740,AT1G34350,AT1G50430,AT1G50890,AT1G56580,AT1G64690,AT1G70940,AT1G73360,AT1G75750,AT1G79620,AT1G79860,AT1G80350,AT2G05520,AT2G19690,AT2G19760,AT2G26420,AT2G28620,AT2G35650,AT2G37540,AT2G41210,AT2G41630,AT2G41970,AT3G02242,AT3G07880,AT3G09840,AT3G18000,AT3G19820,AT3G21220…
GO:BP	xylan metabolic process	GO:0045491	0.000581356	3.23556	59	3002	23	23012	AT1G08990,AT1G19300,AT1G27930,AT1G28240,AT1G33800,AT1G54940,AT1G71930,AT1G73140,AT1G77130,AT2G15440,AT2G37090,AT2G38320,AT2G40320,AT3G55990,AT4G08160,AT4G09990,AT4G33330,AT5G01360,AT5G22940,AT5G49360,AT5G54690,AT5G59290,AT5G67210
GO:BP	regulation of auxin mediated signaling pathway	GO:0010928	0.000614782	3.21128	51	3002	21	23012	AT1G23080,AT1G53940,AT1G54200,AT1G59870,AT1G69160,AT1G70940,AT1G73590,AT1G77110,AT2G36910,AT2G43010,AT2G44830,AT3G11220,AT3G13980,AT3G46110,AT3G62150,AT4G16340,AT4G35020,AT4G35987,AT4G37900,AT5G12050,AT5G12210
GO:BP	organic hydroxy compound biosynthetic process	GO:1901617	0.000745119	3.12777	244	3002	60	23012	AT1G02205,AT1G02860,AT1G10030,AT1G10170,AT1G12740,AT1G18870,AT1G30530,AT1G50430,AT1G53130,AT1G54570,AT1G59171,AT1G64670,AT1G74470,AT2G18950,AT2G22240,AT2G22830,AT2G24300,AT2G26260,AT2G37700,AT2G38010,AT2G38700,AT2G43420,AT2G45400,AT2G47460,AT3G02870,AT3G14990,AT3G19820,AT3G43600,AT3G48780,AT3G52940,AT4G11820,AT4G15400,AT4G17190,AT4G22756,AT4G23690,AT4G31000,AT4G34135,AT4G34650,AT4G36380,AT4G37760…
GO:BP	mitotic cell cycle phase transition	GO:0044772	0.000759593	3.11942	86	3002	29	23012	AT1G14750,AT1G15570,AT1G20610,AT1G20930,AT1G44110,AT1G47210,AT1G49910,AT1G50490,AT1G70210,AT1G76310,AT1G76540,AT1G77390,AT1G80370,AT2G17620,AT2G26760,AT2G33560,AT3G11520,AT3G18730,AT3G25980,AT3G54180,AT4G34160,AT4G35620,AT5G05510,AT5G06150,AT5G11300,AT5G14250,AT5G25380,AT5G43080,AT5G66130
GO:BP	catabolic process	GO:0009056	0.000775578	3.11037	1911	3002	320	23012	AT1G02300,AT1G02660,AT1G02920,AT1G02950,AT1G04680,AT1G05240,AT1G05260,AT1G05310,AT1G05630,AT1G06430,AT1G06450,AT1G06550,AT1G06570,AT1G09080,AT1G09340,AT1G09890,AT1G10360,AT1G10760,AT1G11860,AT1G11920,AT1G12000,AT1G12820,AT1G14120,AT1G14210,AT1G14220,AT1G14230,AT1G14240,AT1G17190,AT1G18070,AT1G18140,AT1G20120,AT1G20630,AT1G20850,AT1G20950,AT1G21410,AT1G21760,AT1G22170,AT1G22880,AT1G23200,AT1G26820…
GO:BP	regulation of hormone levels	GO:0010817	0.000797209	3.09843	289	3002	68	23012	AT1G04180,AT1G04610,AT1G05680,AT1G10030,AT1G12740,AT1G13210,AT1G14120,AT1G16510,AT1G17140,AT1G23080,AT1G25250,AT1G30690,AT1G50430,AT1G50575,AT1G53700,AT1G54200,AT1G59870,AT1G66340,AT1G67110,AT1G68710,AT1G69160,AT1G70940,AT1G73590,AT1G76520,AT1G77110,AT1G77690,AT2G03760,AT2G26260,AT2G31750,AT2G35990,AT2G36800,AT2G36910,AT2G38120,AT2G43010,AT2G44830,AT2G45400,AT2G47260,AT3G13980,AT3G14370,AT3G19820…
GO:BP	carboxylic acid metabolic process	GO:0019752	0.000866654	3.06215	1050	3002	191	23012	AT1G02860,AT1G05560,AT1G05680,AT1G06080,AT1G06550,AT1G06570,AT1G08250,AT1G08510,AT1G10170,AT1G10670,AT1G11860,AT1G12000,AT1G15040,AT1G16060,AT1G18870,AT1G20560,AT1G20950,AT1G22170,AT1G22640,AT1G26360,AT1G26570,AT1G31230,AT1G36160,AT1G48420,AT1G48470,AT1G49430,AT1G52400,AT1G53130,AT1G53520,AT1G62640,AT1G63660,AT1G64660,AT1G64670,AT1G65930,AT1G66230,AT1G67070,AT1G67730,AT1G69240,AT1G70480,AT1G70980…
GO:BP	cellular carbohydrate biosynthetic process	GO:0034637	0.000928453	3.03224	240	3002	59	23012	AT1G02730,AT1G06490,AT1G08990,AT1G10670,AT1G12780,AT1G16860,AT1G19300,AT1G27930,AT1G32900,AT1G33800,AT1G51630,AT1G54940,AT1G70290,AT1G73140,AT1G77130,AT1G78090,AT1G78240,AT1G78580,AT2G15440,AT2G22190,AT2G22240,AT2G35840,AT2G36390,AT2G37090,AT2G38320,AT2G39770,AT3G02140,AT3G02870,AT3G21190,AT3G29810,AT3G52340,AT3G55990,AT3G57200,AT3G62720,AT4G01220,AT4G01750,AT4G09990,AT4G15290,AT4G17090,AT4G18780…
GO:BP	positive regulation of developmental process	GO:0051094	0.000987231	3.00558	130	3002	38	23012	AT1G04250,AT1G04400,AT1G10670,AT1G11130,AT1G15570,AT1G21920,AT1G25540,AT1G28520,AT1G69935,AT1G75220,AT1G79620,AT2G19450,AT2G43820,AT2G44080,AT2G46590,AT3G04060,AT3G12130,AT3G19290,AT3G48990,AT3G63530,AT4G24620,AT4G31820,AT4G32880,AT4G34220,AT4G35900,AT4G36900,AT4G39070,AT4G39850,AT5G06550,AT5G06850,AT5G09530,AT5G11300,AT5G13910,AT5G14930,AT5G23280,AT5G39610,AT5G40490,AT5G65810
GO:BP	regulation of phosphorus metabolic process	GO:0051174	0.00111162	2.95404	161	3002	44	23012	AT1G03760,AT1G05640,AT1G07710,AT1G14750,AT1G15570,AT1G20610,AT1G44110,AT1G47210,AT1G70210,AT1G73500,AT1G76310,AT1G77390,AT1G80370,AT2G04550,AT2G17620,AT2G26040,AT2G26760,AT2G27970,AT2G38310,AT2G40330,AT2G44740,AT3G11520,AT3G50630,AT3G63120,AT4G01026,AT4G17270,AT4G19600,AT4G22860,AT4G34160,AT4G35620,AT4G38740,AT5G04470,AT5G05440,AT5G06150,AT5G07450,AT5G10480,AT5G11300,AT5G15510,AT5G25380,AT5G34850…
GO:BP	regulation of phosphorylation	GO:0042325	0.00112149	2.95021	111	3002	34	23012	AT1G14750,AT1G15570,AT1G20610,AT1G44110,AT1G47210,AT1G70210,AT1G73500,AT1G76310,AT1G77390,AT1G80370,AT2G04550,AT2G17620,AT2G26760,AT2G27970,AT2G44740,AT3G11520,AT3G50630,AT3G63120,AT4G17270,AT4G19600,AT4G22860,AT4G34160,AT4G35620,AT4G38740,AT5G04470,AT5G06150,AT5G07450,AT5G10480,AT5G11300,AT5G15510,AT5G25380,AT5G37478,AT5G43080,AT5G48820
GO:BP	response to extracellular stimulus	GO:0009991	0.00134801	2.87031	293	3002	68	23012	AT1G05630,AT1G05680,AT1G06830,AT1G09340,AT1G13300,AT1G15460,AT1G18420,AT1G20630,AT1G22160,AT1G22500,AT1G22730,AT1G35350,AT1G54570,AT1G62300,AT1G64660,AT1G66180,AT1G67070,AT1G70410,AT1G71040,AT1G73730,AT1G78020,AT1G78380,AT1G80760,AT2G01830,AT2G03240,AT2G15970,AT2G22240,AT2G27050,AT2G30766,AT2G47160,AT3G01500,AT3G02570,AT3G07700,AT3G11220,AT3G16690,AT3G20660,AT3G25710,AT3G47640,AT3G48350,AT3G53900…
GO:BP	response to light stimulus	GO:0009416	0.00134846	2.87016	773	3002	147	23012	AT1G02340,AT1G04400,AT1G05630,AT1G08650,AT1G08830,AT1G10170,AT1G10670,AT1G15380,AT1G15820,AT1G19350,AT1G20630,AT1G21920,AT1G22500,AT1G22730,AT1G25540,AT1G26945,AT1G28520,AT1G29930,AT1G32870,AT1G42970,AT1G44575,AT1G51140,AT1G51400,AT1G52410,AT1G52830,AT1G59940,AT1G60950,AT1G61520,AT1G66180,AT1G66580,AT1G67070,AT1G67740,AT1G69530,AT1G69570,AT1G69935,AT1G70940,AT1G73590,AT1G76380,AT1G78080,AT1G78370…
GO:BP	pectin catabolic process	GO:0045490	0.00154111	2.81217	98	3002	31	23012	AT1G04680,AT1G05310,AT1G11920,AT1G23200,AT1G53830,AT1G53840,AT1G67750,AT2G19150,AT2G26440,AT2G43050,AT3G07010,AT3G07970,AT3G10710,AT3G10720,AT3G24670,AT3G26610,AT3G27400,AT3G29090,AT3G47400,AT3G49220,AT3G53190,AT4G13210,AT4G13710,AT4G22080,AT4G24780,AT5G04960,AT5G04970,AT5G09760,AT5G20860,AT5G48900,AT5G55590
GO:BP	cell cycle process	GO:0022402	0.00164451	2.78396	471	3002	98	23012	AT1G01370,AT1G01690,AT1G02730,AT1G04030,AT1G14750,AT1G15570,AT1G18370,AT1G20610,AT1G20750,AT1G20930,AT1G44110,AT1G44900,AT1G47210,AT1G49910,AT1G50490,AT1G53140,AT1G63990,AT1G69690,AT1G70210,AT1G71830,AT1G76310,AT1G76540,AT1G77390,AT1G80370,AT2G17620,AT2G26760,AT2G28620,AT2G31270,AT2G32590,AT2G33560,AT2G35190,AT2G41420,AT2G42890,AT3G05330,AT3G05480,AT3G09840,AT3G11520,AT3G14190,AT3G18730,AT3G19050…
GO:BP	ion transmembrane transport	GO:0034220	0.00198521	2.70219	577	3002	115	23012	AT1G01340,AT1G05300,AT1G08100,AT1G10800,AT1G14360,AT1G15460,AT1G16310,AT1G18420,AT1G18880,AT1G21140,AT1G25480,AT1G27770,AT1G32450,AT1G34020,AT1G35350,AT1G52190,AT1G53760,AT1G59870,AT1G60160,AT1G62320,AT1G64780,AT1G70480,AT1G72140,AT1G73220,AT1G74770,AT1G76430,AT1G76800,AT1G78560,AT1G78900,AT1G80050,AT1G80760,AT2G02810,AT2G03240,AT2G16510,AT2G17290,AT2G19110,AT2G21120,AT2G23790,AT2G24610,AT2G28315…
GO:BP	regulation of stomatal movement	GO:0010119	0.00206744	2.68457	104	3002	32	23012	AT1G09540,AT1G10560,AT1G23030,AT1G51140,AT1G52400,AT1G57560,AT1G64060,AT1G66340,AT1G69530,AT1G69850,AT1G70410,AT2G05070,AT2G05100,AT2G17290,AT2G19690,AT2G26300,AT2G40820,AT3G01500,AT3G11820,AT3G21220,AT3G45780,AT3G49220,AT3G51860,AT3G56480,AT3G59700,AT4G04740,AT4G22790,AT4G23650,AT4G33050,AT5G13740,AT5G23060,AT5G54270
GO:BP	regulation of phosphate metabolic process	GO:0019220	0.00237845	2.62371	160	3002	43	23012	AT1G03760,AT1G05640,AT1G07710,AT1G14750,AT1G15570,AT1G20610,AT1G44110,AT1G47210,AT1G70210,AT1G73500,AT1G76310,AT1G77390,AT1G80370,AT2G04550,AT2G17620,AT2G26040,AT2G26760,AT2G27970,AT2G38310,AT2G40330,AT2G44740,AT3G11520,AT3G50630,AT3G63120,AT4G01026,AT4G17270,AT4G19600,AT4G22860,AT4G34160,AT4G35620,AT4G38740,AT5G04470,AT5G05440,AT5G06150,AT5G07450,AT5G10480,AT5G11300,AT5G15510,AT5G25380,AT5G37478…
GO:BP	root hair elongation	GO:0048767	0.00238313	2.62285	72	3002	25	23012	AT1G01910,AT1G10480,AT1G12560,AT1G63450,AT1G70940,AT1G77110,AT2G26420,AT2G41970,AT2G45890,AT3G01730,AT3G06810,AT3G20630,AT3G43960,AT3G53750,AT4G14430,AT4G15290,AT4G34580,AT4G35020,AT5G05500,AT5G16910,AT5G27840,AT5G44610,AT5G45420,AT5G56540,AT5G60660
GO:BP	cellular developmental process	GO:0048869	0.00250891	2.60051	839	3002	156	23012	AT1G01380,AT1G01690,AT1G01910,AT1G06520,AT1G08590,AT1G08660,AT1G09080,AT1G10480,AT1G11130,AT1G12040,AT1G12260,AT1G12560,AT1G14740,AT1G15570,AT1G16440,AT1G19835,AT1G20850,AT1G22910,AT1G25540,AT1G27380,AT1G27740,AT1G33470,AT1G34350,AT1G43790,AT1G55170,AT1G56580,AT1G59870,AT1G63450,AT1G63650,AT1G64690,AT1G66230,AT1G66350,AT1G67170,AT1G70940,AT1G71830,AT1G71930,AT1G73360,AT1G77110,AT1G77390,AT1G78080…
GO:BP	lignin catabolic process	GO:0046274	0.00267236	2.57311	18	3002	11	23012	AT1G18140,AT2G29130,AT2G30210,AT2G38080,AT3G09220,AT5G01190,AT5G03260,AT5G05390,AT5G07130,AT5G58910,AT5G60020
GO:BP	phenylpropanoid catabolic process	GO:0046271	0.00267236	2.57311	18	3002	11	23012	AT1G18140,AT2G29130,AT2G30210,AT2G38080,AT3G09220,AT5G01190,AT5G03260,AT5G05390,AT5G07130,AT5G58910,AT5G60020
GO:BP	regulation of transferase activity	GO:0051338	0.00277042	2.55745	120	3002	35	23012	AT1G14750,AT1G15570,AT1G20610,AT1G44110,AT1G47210,AT1G70210,AT1G73500,AT1G76310,AT1G77390,AT1G80370,AT2G04550,AT2G17620,AT2G26760,AT2G27970,AT2G44740,AT3G11520,AT3G48360,AT3G50630,AT3G57860,AT3G63120,AT4G17270,AT4G19600,AT4G22860,AT4G34160,AT4G35620,AT5G04470,AT5G06150,AT5G07450,AT5G11300,AT5G13840,AT5G15510,AT5G25380,AT5G37478,AT5G43080,AT5G48820
GO:BP	cellular component organization or biogenesis	GO:0071840	0.00283152	2.54798	3433	3002	533	23012	AT1G01370,AT1G01690,AT1G01750,AT1G01910,AT1G02730,AT1G02900,AT1G04030,AT1G04050,AT1G04170,AT1G04400,AT1G04820,AT1G05240,AT1G05310,AT1G05360,AT1G06490,AT1G07070,AT1G07130,AT1G07790,AT1G08990,AT1G09340,AT1G10670,AT1G10865,AT1G11160,AT1G11545,AT1G12040,AT1G12150,AT1G12260,AT1G12560,AT1G12780,AT1G13160,AT1G13210,AT1G13250,AT1G14750,AT1G15420,AT1G16280,AT1G17710,AT1G18070,AT1G18830,AT1G19300,AT1G19835…
GO:BP	monocarboxylic acid metabolic process	GO:0032787	0.0028373	2.5471	544	3002	109	23012	AT1G02860,AT1G05560,AT1G05680,AT1G06080,AT1G08510,AT1G10170,AT1G10670,AT1G12000,AT1G16060,AT1G18870,AT1G20560,AT1G20950,AT1G22170,AT1G22640,AT1G26360,AT1G36160,AT1G49430,AT1G52400,AT1G53130,AT1G53520,AT1G62640,AT1G64670,AT1G67730,AT1G69240,AT1G70480,AT1G73680,AT1G77590,AT1G79440,AT2G13810,AT2G18790,AT2G18950,AT2G21170,AT2G24300,AT2G29980,AT2G32720,AT2G33150,AT2G38010,AT2G41010,AT2G43820,AT2G45970…
GO:BP	response to radiation	GO:0009314	0.00287972	2.54065	796	3002	149	23012	AT1G02340,AT1G04400,AT1G05630,AT1G08650,AT1G08830,AT1G10170,AT1G10670,AT1G15380,AT1G15820,AT1G19350,AT1G20630,AT1G21920,AT1G22500,AT1G22730,AT1G25540,AT1G26945,AT1G28520,AT1G29930,AT1G32870,AT1G42970,AT1G44575,AT1G51140,AT1G51400,AT1G52410,AT1G52830,AT1G59940,AT1G60950,AT1G61520,AT1G66180,AT1G66580,AT1G67070,AT1G67740,AT1G69530,AT1G69570,AT1G69935,AT1G70940,AT1G73590,AT1G76380,AT1G78080,AT1G78370…
GO:BP	cellular response to auxin stimulus	GO:0071365	0.0029346	2.53245	282	3002	65	23012	AT1G04250,AT1G04550,AT1G12820,AT1G16510,AT1G21410,AT1G23080,AT1G30690,AT1G52830,AT1G53700,AT1G53940,AT1G54200,AT1G56010,AT1G56150,AT1G59870,AT1G69160,AT1G70940,AT1G71930,AT1G73590,AT1G76520,AT1G77110,AT1G77690,AT2G01950,AT2G04550,AT2G21050,AT2G22670,AT2G28350,AT2G33310,AT2G36910,AT2G38120,AT2G43010,AT2G44830,AT2G45950,AT2G46990,AT3G11220,AT3G12090,AT3G12830,AT3G13980,AT3G14370,AT3G15540,AT3G17600…
GO:BP	response to nutrient levels	GO:0031667	0.00305272	2.51531	254	3002	60	23012	AT1G05630,AT1G06830,AT1G13300,AT1G15460,AT1G18420,AT1G20630,AT1G22160,AT1G22500,AT1G22730,AT1G35350,AT1G54570,AT1G62300,AT1G64660,AT1G66180,AT1G67070,AT1G70410,AT1G71040,AT1G73730,AT1G78020,AT1G80760,AT2G01830,AT2G03240,AT2G22240,AT2G27050,AT2G30766,AT2G47160,AT3G01500,AT3G02570,AT3G07700,AT3G11220,AT3G16690,AT3G25710,AT3G47640,AT3G48350,AT3G53900,AT3G62680,AT4G00550,AT4G01900,AT4G02270,AT4G04620…
GO:BP	response to gravity	GO:0009629	0.00315428	2.5011	101	3002	31	23012	AT1G05630,AT1G16510,AT1G17400,AT1G19115,AT1G25250,AT1G69935,AT1G70940,AT1G73590,AT1G78370,AT2G17990,AT2G18790,AT2G19690,AT2G21650,AT2G36910,AT2G38120,AT2G46990,AT3G17600,AT3G62100,AT4G16340,AT4G24670,AT4G35020,AT4G35987,AT5G13930,AT5G45710,AT5G47990,AT5G48010,AT5G49665,AT5G50375,AT5G55910,AT5G64770,AT5G65683
GO:BP	response to cold	GO:0009409	0.00335453	2.47437	400	3002	85	23012	AT1G03680,AT1G05260,AT1G08930,AT1G09340,AT1G09350,AT1G10760,AT1G15380,AT1G16390,AT1G17190,AT1G20450,AT1G21760,AT1G21910,AT1G22882,AT1G22890,AT1G28520,AT1G29390,AT1G32060,AT1G42970,AT1G43160,AT1G60170,AT1G61520,AT1G66280,AT1G67090,AT1G74520,AT1G77490,AT1G78080,AT1G79440,AT2G05070,AT2G05100,AT2G15970,AT2G16500,AT2G18790,AT2G19450,AT2G21060,AT2G22300,AT2G24500,AT2G31180,AT2G36270,AT2G37760,AT2G38750…
GO:BP	cellular response to stress	GO:0033554	0.00372646	2.4287	1272	3002	221	23012	AT1G01720,AT1G02860,AT1G04020,AT1G04980,AT1G05680,AT1G06830,AT1G07370,AT1G08830,AT1G09070,AT1G09080,AT1G09340,AT1G09815,AT1G10140,AT1G12520,AT1G13260,AT1G13300,AT1G13635,AT1G14360,AT1G14460,AT1G14750,AT1G15010,AT1G15970,AT1G16390,AT1G18420,AT1G20630,AT1G20750,AT1G21910,AT1G22220,AT1G23710,AT1G26270,AT1G29390,AT1G30720,AT1G32540,AT1G32870,AT1G32928,AT1G33055,AT1G33560,AT1G35140,AT1G35350,AT1G43160…
GO:BP	export across plasma membrane	GO:0140115	0.00381139	2.41892	97	3002	30	23012	AT1G11670,AT1G23080,AT1G33110,AT1G59870,AT1G66760,AT1G66780,AT1G70940,AT1G71140,AT1G71870,AT1G73590,AT1G77110,AT2G04040,AT2G04050,AT2G36910,AT2G44830,AT3G21690,AT3G23560,AT3G60330,AT3G62150,AT4G22790,AT4G23030,AT4G25760,AT4G30190,AT4G31730,AT5G12210,AT5G17700,AT5G49130,AT5G52050,AT5G57350,AT5G65380
GO:BP	response to auxin	GO:0009733	0.00402553	2.39518	456	3002	94	23012	AT1G04250,AT1G04550,AT1G12820,AT1G16510,AT1G21410,AT1G23080,AT1G27740,AT1G30690,AT1G31710,AT1G52830,AT1G53700,AT1G53940,AT1G54200,AT1G56010,AT1G56150,AT1G59870,AT1G62810,AT1G66340,AT1G69160,AT1G70940,AT1G71930,AT1G73590,AT1G76520,AT1G77110,AT1G77690,AT2G01950,AT2G04550,AT2G14960,AT2G19690,AT2G21050,AT2G22240,AT2G22670,AT2G24400,AT2G28350,AT2G33310,AT2G34680,AT2G36210,AT2G36910,AT2G38120,AT2G43010…
GO:BP	cell cycle phase transition	GO:0044770	0.00408473	2.38884	107	3002	32	23012	AT1G14750,AT1G15570,AT1G20610,AT1G20930,AT1G44110,AT1G47210,AT1G49910,AT1G50490,AT1G70210,AT1G76310,AT1G76540,AT1G77390,AT1G80370,AT2G17620,AT2G26760,AT2G31270,AT2G33560,AT3G05480,AT3G11520,AT3G18730,AT3G25980,AT3G54180,AT3G54710,AT4G34160,AT4G35620,AT5G05510,AT5G06150,AT5G11300,AT5G14250,AT5G25380,AT5G43080,AT5G66130
GO:BP	secondary metabolic process	GO:0019748	0.00411553	2.38557	396	3002	84	23012	AT1G02920,AT1G02950,AT1G05240,AT1G10360,AT1G17190,AT1G18140,AT1G21100,AT1G22640,AT1G27130,AT1G27140,AT1G32100,AT1G33800,AT1G52400,AT1G53680,AT1G59870,AT1G61590,AT1G62560,AT1G64670,AT1G66230,AT1G66280,AT1G72680,AT1G73500,AT1G76790,AT1G78370,AT1G78380,AT2G21100,AT2G25450,AT2G29130,AT2G29420,AT2G29440,AT2G30210,AT2G38080,AT2G39430,AT2G43910,AT2G46590,AT3G09220,AT3G10340,AT3G10450,AT3G11430,AT3G11670…
GO:BP	ion transport	GO:0006811	0.00432166	2.36435	776	3002	145	23012	AT1G01340,AT1G01580,AT1G05300,AT1G08100,AT1G10800,AT1G14360,AT1G15460,AT1G16310,AT1G16390,AT1G18420,AT1G18880,AT1G21140,AT1G23020,AT1G25480,AT1G27770,AT1G32450,AT1G34020,AT1G35350,AT1G52190,AT1G53760,AT1G59870,AT1G60160,AT1G62320,AT1G64650,AT1G64780,AT1G69850,AT1G70480,AT1G72140,AT1G73220,AT1G74770,AT1G76430,AT1G76800,AT1G78560,AT1G78900,AT1G80050,AT1G80300,AT1G80760,AT2G01830,AT2G02810,AT2G03240…
GO:BP	cytoskeleton organization	GO:0007010	0.00444937	2.3517	320	3002	71	23012	AT1G01750,AT1G04820,AT1G11160,AT1G13160,AT1G19835,AT1G69230,AT1G80350,AT2G16700,AT2G18990,AT2G19760,AT2G28620,AT2G29890,AT2G31900,AT2G34150,AT2G38160,AT2G39900,AT2G40820,AT2G41740,AT3G04630,AT3G05330,AT3G05470,AT3G06030,AT3G08670,AT3G09840,AT3G12110,AT3G19050,AT3G20860,AT3G23090,AT3G23670,AT3G44050,AT3G46010,AT3G47690,AT3G51300,AT3G53750,AT3G56480,AT3G57410,AT3G58650,AT3G60840,AT4G00680,AT4G09550…
GO:BP	anion transmembrane transport	GO:0098656	0.00477381	2.32114	180	3002	46	23012	AT1G08100,AT1G14360,AT1G15460,AT1G18420,AT1G18880,AT1G25480,AT1G32450,AT1G34020,AT1G35350,AT1G52190,AT1G72140,AT1G76430,AT1G78560,AT1G80050,AT1G80760,AT2G02810,AT2G03240,AT2G17290,AT2G28315,AT2G39510,AT2G47160,AT3G21670,AT3G45680,AT3G45700,AT3G45710,AT3G45780,AT3G51895,AT3G62270,AT4G21120,AT4G21680,AT4G23650,AT4G24570,AT4G28390,AT4G31600,AT5G13740,AT5G14570,AT5G20480,AT5G43350,AT5G46110,AT5G47560…
GO:BP	response to low light intensity stimulus	GO:0009645	0.00559537	2.25217	19	3002	11	23012	AT1G04400,AT1G61520,AT2G05070,AT2G05100,AT2G18790,AT2G26300,AT2G27820,AT2G43010,AT3G47470,AT3G54890,AT3G61470
GO:BP	polysaccharide catabolic process	GO:0000272	0.00575169	2.2402	192	3002	48	23012	AT1G04680,AT1G05310,AT1G09340,AT1G10760,AT1G11920,AT1G22880,AT1G23200,AT1G48930,AT1G53830,AT1G53840,AT1G64390,AT1G67750,AT1G70710,AT1G75680,AT2G19150,AT2G26440,AT2G43050,AT2G43620,AT3G07010,AT3G07970,AT3G10710,AT3G10720,AT3G24670,AT3G26610,AT3G27400,AT3G29090,AT3G47010,AT3G47050,AT3G47400,AT3G49220,AT3G53190,AT4G02290,AT4G08160,AT4G09020,AT4G13210,AT4G13710,AT4G17090,AT4G22080,AT4G24780,AT4G39010…
GO:BP	auxin-activated signaling pathway	GO:0009734	0.00613918	2.21189	265	3002	61	23012	AT1G04250,AT1G04550,AT1G12820,AT1G16510,AT1G21410,AT1G23080,AT1G52830,AT1G53700,AT1G53940,AT1G54200,AT1G56010,AT1G56150,AT1G59870,AT1G69160,AT1G70940,AT1G73590,AT1G76520,AT1G77110,AT1G77690,AT2G01950,AT2G04550,AT2G21050,AT2G22670,AT2G28350,AT2G33310,AT2G36910,AT2G38120,AT2G43010,AT2G44830,AT2G45950,AT2G46990,AT3G11220,AT3G12090,AT3G12830,AT3G13980,AT3G14370,AT3G15540,AT3G17600,AT3G20630,AT3G22810…
GO:BP	response to metal ion	GO:0010038	0.00618963	2.20834	220	3002	53	23012	AT1G01340,AT1G02920,AT1G08830,AT1G15380,AT1G20340,AT1G21140,AT1G22990,AT1G48420,AT1G65930,AT1G67070,AT1G71050,AT1G71200,AT1G76800,AT2G01520,AT2G05520,AT2G19110,AT2G26560,AT2G28160,AT2G28190,AT2G32520,AT2G38380,AT2G40300,AT3G02570,AT3G07720,AT3G12900,AT3G22460,AT3G25190,AT3G51380,AT3G51860,AT3G56090,AT3G56240,AT3G58810,AT3G59690,AT4G02520,AT4G14030,AT4G21680,AT4G25100,AT4G27780,AT4G30120,AT4G33020…
GO:BP	phenylpropanoid biosynthetic process	GO:0009699	0.00626101	2.20336	124	3002	35	23012	AT1G22640,AT1G32100,AT1G61590,AT1G64670,AT1G66230,AT1G72680,AT2G21100,AT2G38080,AT2G39430,AT3G10340,AT3G11430,AT3G11670,AT3G12900,AT3G24020,AT3G44540,AT3G44550,AT3G53510,AT3G55230,AT4G11190,AT4G11210,AT4G23690,AT4G26220,AT4G37970,AT4G39330,AT5G03260,AT5G10280,AT5G13580,AT5G16600,AT5G20230,AT5G23190,AT5G41040,AT5G58860,AT5G60020,AT5G63560,AT5G66390
GO:BP	response to salt stress	GO:0009651	0.00693163	2.15916	474	3002	96	23012	AT1G02730,AT1G05260,AT1G05680,AT1G08830,AT1G08930,AT1G10170,AT1G10940,AT1G15100,AT1G16060,AT1G22882,AT1G22890,AT1G28520,AT1G32230,AT1G43160,AT1G52400,AT1G54100,AT1G56060,AT1G59870,AT1G62660,AT1G66230,AT1G66280,AT1G66340,AT1G66350,AT1G69310,AT1G73500,AT1G74520,AT1G78080,AT2G03760,AT2G16500,AT2G19450,AT2G20880,AT2G25090,AT2G28190,AT2G32010,AT2G34620,AT2G36270,AT2G37760,AT2G38750,AT2G38760,AT2G39770…
GO:BP	lignin metabolic process	GO:0009808	0.00723341	2.14066	76	3002	25	23012	AT1G05240,AT1G18140,AT1G33800,AT1G61590,AT1G66230,AT1G72680,AT2G29130,AT2G30210,AT2G38080,AT3G09220,AT3G11670,AT3G19820,AT4G26220,AT4G37970,AT4G39330,AT5G01190,AT5G03260,AT5G05390,AT5G07130,AT5G16600,AT5G20230,AT5G58910,AT5G60020,AT5G64120,AT5G66390
GO:BP	polysaccharide biosynthetic process	GO:0000271	0.0073131	2.1359	238	3002	56	23012	AT1G02730,AT1G06490,AT1G08990,AT1G10670,AT1G12780,AT1G13250,AT1G16860,AT1G19300,AT1G27930,AT1G28240,AT1G32900,AT1G33800,AT1G51630,AT1G54940,AT1G63450,AT1G73140,AT1G77130,AT1G78240,AT2G15440,AT2G28315,AT2G33570,AT2G36390,AT2G37090,AT2G38320,AT2G39770,AT3G01040,AT3G02140,AT3G21190,AT3G29810,AT3G55990,AT3G57200,AT3G62720,AT4G01220,AT4G01750,AT4G09990,AT4G15290,AT4G18780,AT4G20460,AT4G33330,AT5G01360…
GO:BP	cellular response to lipid	GO:0071396	0.00823939	2.0841	594	3002	115	23012	AT1G01720,AT1G02340,AT1G05680,AT1G10480,AT1G10560,AT1G12010,AT1G12240,AT1G13300,AT1G15100,AT1G15380,AT1G16310,AT1G18890,AT1G19350,AT1G24020,AT1G25540,AT1G32230,AT1G35160,AT1G52400,AT1G53130,AT1G61380,AT1G62660,AT1G62810,AT1G63100,AT1G63650,AT1G64060,AT1G66350,AT1G69935,AT1G71830,AT1G73580,AT1G74500,AT1G75750,AT1G78300,AT2G01950,AT2G04550,AT2G05070,AT2G05100,AT2G17290,AT2G18470,AT2G18790,AT2G25770…
GO:BP	response to osmotic stress	GO:0006970	0.0086461	2.06318	557	3002	109	23012	AT1G02730,AT1G05260,AT1G05680,AT1G08830,AT1G08930,AT1G10170,AT1G10940,AT1G15100,AT1G15380,AT1G16060,AT1G22882,AT1G22890,AT1G28520,AT1G32230,AT1G43160,AT1G52400,AT1G54100,AT1G56060,AT1G59870,AT1G62660,AT1G64060,AT1G64670,AT1G66230,AT1G66280,AT1G66340,AT1G66350,AT1G69310,AT1G73500,AT1G74520,AT1G78080,AT2G01830,AT2G03760,AT2G16500,AT2G19450,AT2G20880,AT2G25090,AT2G28190,AT2G32010,AT2G32510,AT2G34620…
GO:BP	anion transport	GO:0006820	0.00885376	2.05287	291	3002	65	23012	AT1G08100,AT1G14360,AT1G15460,AT1G18420,AT1G18880,AT1G25480,AT1G32450,AT1G34020,AT1G35350,AT1G52190,AT1G64650,AT1G69850,AT1G72140,AT1G76430,AT1G78560,AT1G80050,AT1G80300,AT1G80760,AT2G01830,AT2G02810,AT2G03240,AT2G17290,AT2G19690,AT2G28315,AT2G39510,AT2G40530,AT2G40900,AT2G47160,AT3G01970,AT3G21670,AT3G45680,AT3G45700,AT3G45710,AT3G45780,AT3G51870,AT3G51895,AT3G55740,AT3G62270,AT4G12030,AT4G19030…
GO:BP	regulation of response to stimulus	GO:0048583	0.0100229	1.999	788	3002	145	23012	AT1G01720,AT1G02660,AT1G04400,AT1G07260,AT1G10560,AT1G11310,AT1G13300,AT1G15100,AT1G15380,AT1G16310,AT1G20160,AT1G21920,AT1G23080,AT1G25540,AT1G28280,AT1G28520,AT1G32540,AT1G32870,AT1G33970,AT1G50640,AT1G51090,AT1G52400,AT1G53940,AT1G54200,AT1G56060,AT1G59870,AT1G61380,AT1G63100,AT1G64670,AT1G66230,AT1G66340,AT1G66350,AT1G67950,AT1G69160,AT1G69570,AT1G69935,AT1G70940,AT1G73580,AT1G73590,AT1G76380…
GO:BP	response to bacterium	GO:0009617	0.0100497	1.99785	509	3002	101	23012	AT1G01340,AT1G01580,AT1G02205,AT1G02860,AT1G08320,AT1G08830,AT1G10170,AT1G12240,AT1G15530,AT1G17750,AT1G19350,AT1G20160,AT1G20850,AT1G22882,AT1G22890,AT1G32230,AT1G33560,AT1G33970,AT1G51090,AT1G53130,AT1G53940,AT1G53990,AT1G59870,AT1G61380,AT1G62660,AT1G62810,AT1G65930,AT1G66340,AT1G80840,AT2G01830,AT2G13810,AT2G17265,AT2G17520,AT2G19190,AT2G22240,AT2G22300,AT2G25000,AT2G26440,AT2G27040,AT2G27050…
GO:BP	metabolic process	GO:0008152	0.0115868	1.93604	13560	3002	1876	23012	AT1G01260,AT1G01350,AT1G01380,AT1G01610,AT1G01650,AT1G01660,AT1G01690,AT1G01720,AT1G01900,AT1G02205,AT1G02300,AT1G02340,AT1G02500,AT1G02660,AT1G02730,AT1G02850,AT1G02860,AT1G02920,AT1G02950,AT1G03040,AT1G03130,AT1G03630,AT1G03680,AT1G03760,AT1G03850,AT1G03910,AT1G03920,AT1G04020,AT1G04050,AT1G04170,AT1G04180,AT1G04250,AT1G04400,AT1G04550,AT1G04610,AT1G04680,AT1G04700,AT1G04990,AT1G05240,AT1G05260…
GO:BP	post-embryonic development	GO:0009791	0.0118698	1.92556	1633	3002	271	23012	AT1G01550,AT1G03910,AT1G04400,AT1G08100,AT1G08320,AT1G08590,AT1G09090,AT1G09540,AT1G09970,AT1G10560,AT1G10670,AT1G11130,AT1G12820,AT1G13260,AT1G15570,AT1G16060,AT1G16280,AT1G20160,AT1G20450,AT1G21210,AT1G21410,AT1G21920,AT1G23080,AT1G25250,AT1G25540,AT1G28240,AT1G28520,AT1G31070,AT1G32230,AT1G36160,AT1G44900,AT1G44970,AT1G47200,AT1G48920,AT1G49430,AT1G51140,AT1G52410,AT1G52830,AT1G53130,AT1G53330…
GO:BP	cellular polysaccharide biosynthetic process	GO:0033692	0.0140029	1.85378	198	3002	48	23012	AT1G02730,AT1G06490,AT1G08990,AT1G10670,AT1G12780,AT1G16860,AT1G19300,AT1G27930,AT1G32900,AT1G33800,AT1G51630,AT1G54940,AT1G73140,AT1G77130,AT1G78240,AT2G15440,AT2G36390,AT2G37090,AT2G38320,AT2G39770,AT3G02140,AT3G21190,AT3G29810,AT3G55990,AT3G57200,AT3G62720,AT4G01220,AT4G01750,AT4G09990,AT4G15290,AT4G18780,AT4G20460,AT4G33330,AT5G01360,AT5G06610,AT5G09870,AT5G15630,AT5G16910,AT5G17420,AT5G22940…
GO:BP	auxin transport	GO:0060918	0.0161814	1.79099	129	3002	35	23012	AT1G10030,AT1G13210,AT1G16510,AT1G17140,AT1G23080,AT1G25250,AT1G30690,AT1G53700,AT1G54200,AT1G59870,AT1G68710,AT1G69160,AT1G70940,AT1G73590,AT1G76520,AT1G77110,AT1G77690,AT2G26260,AT2G36910,AT2G38120,AT2G44830,AT2G47260,AT3G13980,AT3G14370,AT3G22942,AT3G62150,AT4G11880,AT4G31820,AT4G36760,AT4G38430,AT5G12050,AT5G12210,AT5G13930,AT5G19530,AT5G64770
GO:BP	regulation of cell cycle	GO:0051726	0.0170505	1.76826	256	3002	58	23012	AT1G07370,AT1G14750,AT1G15570,AT1G20610,AT1G20930,AT1G44110,AT1G47210,AT1G49910,AT1G50490,AT1G63100,AT1G70210,AT1G76310,AT1G76540,AT1G77390,AT1G80370,AT2G17620,AT2G26760,AT2G27970,AT2G31270,AT2G33560,AT2G42890,AT2G44740,AT3G05480,AT3G11520,AT3G14190,AT3G23580,AT3G25980,AT3G27060,AT3G44050,AT3G50000,AT3G50630,AT3G54180,AT3G54710,AT3G57860,AT3G63120,AT4G10010,AT4G13020,AT4G19600,AT4G22860,AT4G32830…
GO:BP	gravitropism	GO:0009630	0.0175541	1.75562	94	3002	28	23012	AT1G05630,AT1G16510,AT1G17400,AT1G19115,AT1G25250,AT1G69935,AT1G70940,AT1G73590,AT2G17990,AT2G18790,AT2G19690,AT2G21650,AT2G36910,AT2G38120,AT2G46990,AT3G17600,AT3G62100,AT4G16340,AT4G24670,AT4G35020,AT4G35987,AT5G45710,AT5G47990,AT5G49665,AT5G50375,AT5G55910,AT5G64770,AT5G65683
GO:BP	salicylic acid biosynthetic process	GO:0009697	0.020303	1.69244	21	3002	11	23012	AT1G02860,AT1G10170,AT1G18870,AT1G53130,AT2G24300,AT4G31000,AT5G03320,AT5G26920,AT5G40770,AT5G62570,AT5G67160
GO:BP	leaf development	GO:0048366	0.022399	1.64977	395	3002	81	23012	AT1G04250,AT1G04400,AT1G10670,AT1G11130,AT1G13260,AT1G19300,AT1G25250,AT1G32450,AT1G48920,AT1G53190,AT1G53700,AT1G54570,AT1G59870,AT1G60160,AT1G73220,AT1G73500,AT1G73590,AT1G73680,AT1G79440,AT2G13810,AT2G19760,AT2G21050,AT2G22300,AT2G28350,AT2G28890,AT2G34010,AT2G39200,AT2G39730,AT2G40300,AT2G46310,AT2G46990,AT3G04060,AT3G07050,AT3G09070,AT3G10500,AT3G10985,AT3G11220,AT3G12130,AT3G14067,AT3G14370…
GO:BP	obsolete protein-chromophore linkage	GO:0018298	0.0231092	1.63621	53	3002	19	23012	AT1G04400,AT1G15820,AT1G29930,AT1G61520,AT2G05070,AT2G05100,AT2G18790,AT2G34420,AT3G08940,AT3G45780,AT3G47470,AT3G54890,AT3G61470,AT4G10340,AT4G16250,AT5G01530,AT5G24850,AT5G54270,AT5G58140
GO:BP	response to biotic stimulus	GO:0009607	0.0249029	1.60375	1512	3002	251	23012	AT1G01340,AT1G01580,AT1G02205,AT1G02660,AT1G02860,AT1G02920,AT1G03850,AT1G04400,AT1G07260,AT1G08320,AT1G08830,AT1G09750,AT1G09970,AT1G10170,AT1G10760,AT1G11000,AT1G11310,AT1G12240,AT1G15010,AT1G15530,AT1G17750,AT1G19350,AT1G20160,AT1G20850,AT1G22882,AT1G22890,AT1G25275,AT1G25540,AT1G27130,AT1G28190,AT1G32230,AT1G32540,AT1G33560,AT1G33970,AT1G49050,AT1G49430,AT1G50050,AT1G50060,AT1G51090,AT1G52400…
GO:BP	unidimensional cell growth	GO:0009826	0.0249336	1.60322	306	3002	66	23012	AT1G08660,AT1G09080,AT1G11160,AT1G12040,AT1G21210,AT1G21270,AT1G27380,AT1G34350,AT1G50430,AT1G50890,AT1G75750,AT1G79620,AT1G79860,AT2G05520,AT2G19690,AT2G19760,AT2G26420,AT2G28620,AT2G35650,AT2G37540,AT2G41210,AT2G41630,AT2G41970,AT3G07880,AT3G09840,AT3G18000,AT3G19820,AT3G21220,AT3G22200,AT3G23090,AT3G26610,AT3G29030,AT3G51160,AT3G51300,AT3G54180,AT3G63310,AT3G63430,AT4G02270,AT4G02350,AT4G24580…
GO:BP	fatty acid metabolic process	GO:0006631	0.0260961	1.58342	277	3002	61	23012	AT1G06080,AT1G08510,AT1G10670,AT1G16060,AT1G20560,AT1G36160,AT1G49430,AT1G53130,AT1G53520,AT1G62640,AT1G67730,AT1G73680,AT1G77590,AT2G18950,AT2G29980,AT2G32720,AT2G33150,AT2G38010,AT2G45970,AT3G05020,AT3G06460,AT3G06650,AT3G06810,AT3G07560,AT3G10520,AT3G12800,AT3G14130,AT3G15290,AT3G19260,AT3G22400,AT3G25110,AT3G28910,AT3G47860,AT3G48990,AT3G55360,AT3G58750,AT3G63170,AT4G00360,AT4G01900,AT4G04320…
GO:BP	homeostatic process	GO:0042592	0.0262751	1.58046	483	3002	95	23012	AT1G01580,AT1G04400,AT1G05630,AT1G12520,AT1G12740,AT1G14120,AT1G14740,AT1G15460,AT1G20340,AT1G21140,AT1G21270,AT1G22990,AT1G23080,AT1G32450,AT1G52400,AT1G56060,AT1G59870,AT1G64060,AT1G64780,AT1G65970,AT1G66970,AT1G67740,AT1G69690,AT1G70940,AT1G71050,AT1G73590,AT1G74770,AT1G75220,AT1G76800,AT1G77110,AT2G01830,AT2G05070,AT2G05100,AT2G14520,AT2G18790,AT2G19110,AT2G23790,AT2G23950,AT2G36390,AT2G40300…
GO:BP	response to temperature stimulus	GO:0009266	0.0275865	1.5593	648	3002	121	23012	AT1G03680,AT1G05260,AT1G08930,AT1G09090,AT1G09340,AT1G09350,AT1G10760,AT1G13080,AT1G15380,AT1G16390,AT1G17190,AT1G20450,AT1G21760,AT1G21910,AT1G22882,AT1G22890,AT1G28520,AT1G29390,AT1G32060,AT1G42970,AT1G43160,AT1G59870,AT1G60170,AT1G61520,AT1G66280,AT1G66340,AT1G67090,AT1G67970,AT1G74520,AT1G76560,AT1G77490,AT1G78080,AT1G79440,AT1G79930,AT2G05070,AT2G05100,AT2G15970,AT2G16500,AT2G18790,AT2G18950…
GO:BP	hormone transport	GO:0009914	0.027637	1.55851	132	3002	35	23012	AT1G10030,AT1G13210,AT1G16510,AT1G17140,AT1G23080,AT1G25250,AT1G30690,AT1G53700,AT1G54200,AT1G59870,AT1G68710,AT1G69160,AT1G70940,AT1G73590,AT1G76520,AT1G77110,AT1G77690,AT2G26260,AT2G36910,AT2G38120,AT2G44830,AT2G47260,AT3G13980,AT3G14370,AT3G22942,AT3G62150,AT4G11880,AT4G31820,AT4G36760,AT4G38430,AT5G12050,AT5G12210,AT5G13930,AT5G19530,AT5G64770
GO:BP	positive regulation of post-embryonic development	GO:0048582	0.031773	1.49794	82	3002	25	23012	AT1G04400,AT1G10670,AT1G15570,AT1G21920,AT1G25540,AT1G28520,AT1G69935,AT1G75220,AT2G19450,AT2G43820,AT2G46590,AT3G48990,AT4G24620,AT4G31820,AT4G34220,AT4G35900,AT4G39070,AT4G39850,AT5G06550,AT5G06850,AT5G09530,AT5G11300,AT5G13910,AT5G23280,AT5G40490
GO:BP	photosynthesis, light harvesting	GO:0009765	0.0318442	1.49697	37	3002	15	23012	AT1G08380,AT1G15820,AT1G29930,AT1G61520,AT1G75690,AT2G05070,AT2G05100,AT2G34420,AT3G08940,AT3G47470,AT3G54890,AT3G61470,AT4G10340,AT5G01530,AT5G54270
GO:BP	inorganic ion transmembrane transport	GO:0098660	0.032199	1.49216	405	3002	82	23012	AT1G05300,AT1G08100,AT1G10800,AT1G15460,AT1G18880,AT1G21140,AT1G27770,AT1G32450,AT1G35350,AT1G52190,AT1G53760,AT1G59870,AT1G60160,AT1G64780,AT1G72140,AT1G74770,AT1G76430,AT1G76800,AT1G78900,AT1G80050,AT1G80760,AT2G03240,AT2G16510,AT2G19110,AT2G21120,AT2G23790,AT2G24610,AT2G29120,AT2G32390,AT2G41560,AT2G47160,AT3G04110,AT3G21670,AT3G22910,AT3G23870,AT3G24300,AT3G25190,AT3G27020,AT3G45680,AT3G45700…
GO:BP	regulation of protein modification process	GO:0031399	0.0337434	1.47181	210	3002	49	23012	AT1G05640,AT1G07710,AT1G14750,AT1G15570,AT1G20610,AT1G44110,AT1G47210,AT1G70210,AT1G73500,AT1G76310,AT1G77390,AT1G80370,AT2G04550,AT2G16390,AT2G17620,AT2G26040,AT2G26760,AT2G27970,AT2G38310,AT2G40330,AT2G44740,AT3G11520,AT3G50630,AT3G57860,AT3G63120,AT4G01026,AT4G17270,AT4G19600,AT4G22860,AT4G28190,AT4G34160,AT4G35620,AT4G38495,AT4G38740,AT5G04470,AT5G05440,AT5G06150,AT5G07450,AT5G10480,AT5G11300…
GO:BP	benzene-containing compound metabolic process	GO:0042537	0.0385553	1.41392	78	3002	24	23012	AT1G02860,AT1G05560,AT1G10170,AT1G18870,AT1G22640,AT1G26360,AT1G53130,AT1G69240,AT2G24300,AT2G33150,AT2G40000,AT2G41010,AT2G43820,AT3G10340,AT3G50440,AT4G23690,AT4G31000,AT4G35220,AT5G03320,AT5G26920,AT5G40770,AT5G62570,AT5G63560,AT5G67160
GO:BP	microtubule cytoskeleton organization	GO:0000226	0.0422382	1.37429	178	3002	43	23012	AT1G04820,AT1G11160,AT1G19835,AT1G69230,AT1G80350,AT2G18990,AT2G28620,AT2G38160,AT3G04630,AT3G05330,AT3G06030,AT3G08670,AT3G09840,AT3G19050,AT3G20860,AT3G23090,AT3G23670,AT3G44050,AT3G47690,AT3G58650,AT3G60840,AT4G09550,AT4G14150,AT4G18570,AT4G21270,AT4G22860,AT4G25190,AT4G26760,AT4G27180,AT4G32830,AT5G01280,AT5G14790,AT5G15510,AT5G15600,AT5G18700,AT5G19400,AT5G23860,AT5G27930,AT5G37478,AT5G44610…
GO:BP	terpenoid metabolic process	GO:0006721	0.0474653	1.32362	190	3002	45	23012	AT1G10670,AT1G31950,AT1G52400,AT1G54570,AT1G64670,AT1G66020,AT1G78950,AT1G78970,AT1G80340,AT2G18620,AT2G18640,AT2G18790,AT2G46590,AT3G03990,AT3G20160,AT3G21420,AT3G21780,AT3G25820,AT3G29410,AT3G32030,AT3G32040,AT3G43600,AT3G45130,AT4G11820,AT4G15110,AT4G15340,AT4G17190,AT4G19170,AT4G20230,AT4G22260,AT4G25420,AT4G34650,AT5G03730,AT5G11240,AT5G17230,AT5G20960,AT5G36150,AT5G42590,AT5G42600,AT5G47990…
GO:BP	secondary metabolite biosynthetic process	GO:0044550	0.0474653	1.32362	190	3002	45	23012	AT1G22640,AT1G32100,AT1G61590,AT1G62560,AT1G64670,AT1G66230,AT1G72680,AT1G73500,AT1G76790,AT2G21100,AT2G25450,AT2G38080,AT2G39430,AT3G10340,AT3G11430,AT3G11670,AT3G12900,AT3G24020,AT3G44540,AT3G44550,AT3G53510,AT3G55230,AT3G58990,AT4G11190,AT4G11210,AT4G12030,AT4G13430,AT4G23690,AT4G26220,AT4G37970,AT4G39330,AT5G03260,AT5G10280,AT5G13580,AT5G13930,AT5G16600,AT5G20230,AT5G23010,AT5G23190,AT5G41040…
GO:BP	monocarboxylic acid biosynthetic process	GO:0072330	0.0491346	1.30861	265	3002	58	23012	AT1G02860,AT1G06080,AT1G08510,AT1G10170,AT1G10670,AT1G16060,AT1G18870,AT1G22640,AT1G36160,AT1G53130,AT1G62640,AT1G64670,AT1G67730,AT1G70480,AT1G73680,AT2G13810,AT2G18950,AT2G24300,AT2G29980,AT2G32720,AT2G33150,AT2G38010,AT3G05020,AT3G06460,AT3G06650,AT3G10340,AT3G14990,AT3G19260,AT3G22200,AT3G22400,AT3G23820,AT3G25110,AT3G28910,AT3G43600,AT3G44300,AT3G55360,AT4G01900,AT4G04320,AT4G13840,AT4G24670…
KEGG	Metabolic pathways	KEGG:01100	2.47405e-09	8.60659	2333	791	454	4985	AT1G01610,AT1G02500,AT1G02730,AT1G02850,AT1G02920,AT1G02950,AT1G03130,AT1G03630,AT1G04180,AT1G04610,AT1G04680,AT1G05240,AT1G05260,AT1G05590,AT1G06520,AT1G06550,AT1G06570,AT1G06680,AT1G08250,AT1G08380,AT1G08510,AT1G09350,AT1G10360,AT1G10670,AT1G11860,AT1G11920,AT1G12000,AT1G12010,AT1G12240,AT1G12780,AT1G13700,AT1G14230,AT1G14240,AT1G14700,AT1G15820,AT1G17190,AT1G17710,AT1G18870,AT1G20340,AT1G20630…
KEGG	Photosynthesis	KEGG:00195	4.7686e-08	7.32161	45	791	25	4985	AT1G03130,AT1G06680,AT1G08380,AT1G20340,AT1G30380,AT1G31330,AT1G44575,AT1G52230,AT1G60950,AT1G67740,AT1G76100,AT1G79040,AT2G20260,AT2G30570,AT3G16140,AT4G02770,AT4G03280,AT4G05180,AT4G09650,AT4G12800,AT4G21280,AT4G28750,AT4G32260,AT5G64040,AT5G66570
KEGG	Phenylpropanoid biosynthesis	KEGG:00940	2.08943e-05	4.67997	128	791	43	4985	AT1G05240,AT1G05260,AT1G30870,AT1G34510,AT1G44970,AT1G68850,AT1G71695,AT1G72680,AT1G77420,AT2G18980,AT2G38380,AT2G38390,AT2G39040,AT2G47630,AT3G01190,AT3G10340,AT3G28200,AT3G32980,AT3G49960,AT3G62860,AT4G11290,AT4G16270,AT4G21960,AT4G26010,AT4G26220,AT4G30170,AT4G37520,AT4G37970,AT4G39330,AT5G14130,AT5G15180,AT5G16120,AT5G17820,AT5G22410,AT5G24070,AT5G39580,AT5G42180,AT5G51890,AT5G64100,AT5G64110…
KEGG	Photosynthesis - antenna proteins	KEGG:00196	0.000226581	3.64478	22	791	13	4985	AT1G15820,AT1G29930,AT1G61520,AT2G05070,AT2G05100,AT2G34420,AT3G08940,AT3G47470,AT3G54890,AT3G61470,AT4G10340,AT5G01530,AT5G54270
KEGG	Biosynthesis of secondary metabolites	KEGG:01110	0.00421404	2.3753	1276	791	246	4985	AT1G01610,AT1G02205,AT1G02500,AT1G02850,AT1G03630,AT1G05240,AT1G05260,AT1G06520,AT1G08250,AT1G10670,AT1G11860,AT1G12000,AT1G12010,AT1G12240,AT1G13700,AT1G14230,AT1G14240,AT1G18870,AT1G20630,AT1G20950,AT1G22170,AT1G22360,AT1G22400,AT1G26560,AT1G30870,AT1G31230,AT1G31710,AT1G32100,AT1G32900,AT1G34510,AT1G36160,AT1G44970,AT1G50430,AT1G51260,AT1G52400,AT1G54100,AT1G55290,AT1G58290,AT1G60810,AT1G62660…

## Sheet: antiquewhite1
File S1d: functional enrichment of the genes from the antiquewhite1 module of A. thaliana
source	term_name	term_id	adjusted_p_value	negative_log10_of_adjusted_p_value	term_size	query_size	intersection_size	effective_domain_size	intersections
GO:MF	structural constituent of ribosome	GO:0003735	8.84787e-06	5.05316	423	1289	53	23336	AT1G14205,AT1G23290,AT1G26880,AT1G33140,AT1G41880,AT1G48830,AT1G57860,AT1G72370,AT1G80750,AT2G04390,AT2G19730,AT2G27710,AT2G31610,AT2G32060,AT2G37270,AT2G39390,AT2G43460,AT2G47610,AT3G05130,AT3G06700,AT3G07110,AT3G10090,AT3G11120,AT3G11510,AT3G14290,AT3G16780,AT3G18240,AT3G18740,AT3G28900,AT3G49010,AT3G52300,AT3G52580,AT3G53890,AT3G59650,AT3G60245,AT4G00100,AT4G17390,AT4G18730,AT4G25890,AT4G31985…
GO:MF	protein binding	GO:0005515	1.07618e-05	4.96812	7938	1289	530	23336	AT1G01120,AT1G01830,AT1G02420,AT1G02980,AT1G03470,AT1G03840,AT1G05830,AT1G06150,AT1G06710,AT1G07500,AT1G07590,AT1G07650,AT1G07890,AT1G07940,AT1G08620,AT1G08800,AT1G08880,AT1G09250,AT1G09270,AT1G09330,AT1G09415,AT1G10120,AT1G11710,AT1G11960,AT1G12210,AT1G12220,AT1G13630,AT1G13870,AT1G14470,AT1G14570,AT1G15290,AT1G15750,AT1G15890,AT1G16190,AT1G17170,AT1G17455,AT1G17730,AT1G18150,AT1G18750,AT1G18950…
GO:MF	structural molecule activity	GO:0005198	0.000342414	3.46545	589	1289	62	23336	AT1G06760,AT1G08880,AT1G14205,AT1G20693,AT1G23290,AT1G26880,AT1G33140,AT1G41880,AT1G48830,AT1G57860,AT1G72370,AT1G80750,AT2G04390,AT2G19730,AT2G27710,AT2G28720,AT2G31610,AT2G32060,AT2G37270,AT2G39390,AT2G43460,AT2G47610,AT3G05130,AT3G06700,AT3G07110,AT3G10090,AT3G11120,AT3G11130,AT3G11510,AT3G14290,AT3G16780,AT3G18240,AT3G18740,AT3G28900,AT3G49010,AT3G52300,AT3G52580,AT3G53890,AT3G59650,AT3G60245…
GO:MF	binding	GO:0005488	0.00372022	2.42943	15269	1289	914	23336	AT1G01010,AT1G01120,AT1G01600,AT1G01830,AT1G02420,AT1G02980,AT1G03290,AT1G03370,AT1G03470,AT1G03840,AT1G04360,AT1G04860,AT1G05160,AT1G05830,AT1G05850,AT1G06150,AT1G06290,AT1G06310,AT1G06440,AT1G06710,AT1G06760,AT1G07500,AT1G07590,AT1G07650,AT1G07890,AT1G07940,AT1G08620,AT1G08800,AT1G08880,AT1G09250,AT1G09270,AT1G09330,AT1G09415,AT1G10120,AT1G10130,AT1G10490,AT1G10630,AT1G10900,AT1G10960,AT1G11660…
GO:MF	ion binding	GO:0043167	0.034642	1.4604	6552	1289	422	23336	AT1G01600,AT1G03370,AT1G03840,AT1G04360,AT1G04860,AT1G05160,AT1G05830,AT1G06290,AT1G06310,AT1G07650,AT1G07890,AT1G07940,AT1G08620,AT1G10130,AT1G10490,AT1G10630,AT1G10900,AT1G10960,AT1G11660,AT1G11780,AT1G12210,AT1G12220,AT1G12470,AT1G13870,AT1G14250,AT1G14730,AT1G15890,AT1G16710,AT1G16920,AT1G17170,AT1G17220,AT1G17990,AT1G18150,AT1G18490,AT1G18640,AT1G18670,AT1G19200,AT1G19860,AT1G19920,AT1G20260…
GO:MF	mannosyl-oligosaccharide mannosidase activity	GO:0015924	0.0496301	1.30426	6	1289	4	23336	AT1G30000,AT1G51590,AT3G21160,AT5G14950
GO:BP	cellular process	GO:0009987	2.59563e-13	12.5858	15987	1203	958	23012	AT1G01010,AT1G01120,AT1G01600,AT1G02980,AT1G03120,AT1G03290,AT1G03840,AT1G03870,AT1G04200,AT1G04860,AT1G05160,AT1G05830,AT1G05850,AT1G06120,AT1G06150,AT1G06290,AT1G06310,AT1G06470,AT1G06760,AT1G07500,AT1G07650,AT1G07890,AT1G07940,AT1G07960,AT1G08090,AT1G08620,AT1G08960,AT1G09250,AT1G09270,AT1G09330,AT1G10040,AT1G10120,AT1G10130,AT1G10490,AT1G10630,AT1G10900,AT1G10960,AT1G11660,AT1G11755,AT1G11780…
GO:BP	root system development	GO:0022622	6.17387e-13	12.2094	615	1203	84	23012	AT1G03840,AT1G05850,AT1G06150,AT1G08090,AT1G10130,AT1G12470,AT1G13870,AT1G16300,AT1G18640,AT1G24460,AT1G31880,AT1G33280,AT1G50460,AT1G53910,AT1G56560,AT1G59820,AT1G64625,AT1G65380,AT1G65570,AT1G67710,AT1G71090,AT1G77140,AT1G79530,AT2G17070,AT2G25170,AT2G31280,AT2G35510,AT2G39800,AT2G39940,AT2G42490,AT2G45420,AT2G47270,AT3G01090,AT3G02260,AT3G05040,AT3G06440,AT3G07360,AT3G08800,AT3G11600,AT3G12070…
GO:BP	root development	GO:0048364	1.69674e-12	11.7704	614	1203	83	23012	AT1G03840,AT1G05850,AT1G06150,AT1G08090,AT1G10130,AT1G12470,AT1G13870,AT1G16300,AT1G18640,AT1G24460,AT1G31880,AT1G33280,AT1G50460,AT1G53910,AT1G56560,AT1G59820,AT1G64625,AT1G65380,AT1G65570,AT1G67710,AT1G71090,AT1G77140,AT1G79530,AT2G17070,AT2G25170,AT2G31280,AT2G35510,AT2G39800,AT2G39940,AT2G42490,AT2G45420,AT2G47270,AT3G01090,AT3G02260,AT3G05040,AT3G06440,AT3G07360,AT3G08800,AT3G11600,AT3G12070…
GO:BP	plant organ development	GO:0099402	9.3381e-12	11.0297	1164	1203	125	23012	AT1G03840,AT1G05850,AT1G06150,AT1G08090,AT1G08620,AT1G09330,AT1G10130,AT1G12470,AT1G13870,AT1G16300,AT1G18640,AT1G24460,AT1G30210,AT1G31880,AT1G33280,AT1G43850,AT1G50460,AT1G53910,AT1G56560,AT1G59820,AT1G64625,AT1G65380,AT1G65470,AT1G65570,AT1G67710,AT1G68130,AT1G71090,AT1G77140,AT1G79530,AT2G01570,AT2G17070,AT2G19730,AT2G23630,AT2G25170,AT2G25625,AT2G27460,AT2G31280,AT2G35270,AT2G35510,AT2G39800…
GO:BP	system development	GO:0048731	1.5622e-10	9.80626	2070	1203	185	23012	AT1G03840,AT1G05830,AT1G05850,AT1G06150,AT1G07890,AT1G08090,AT1G08620,AT1G09330,AT1G10130,AT1G12470,AT1G13870,AT1G15750,AT1G16300,AT1G17730,AT1G18640,AT1G19080,AT1G20823,AT1G22770,AT1G23290,AT1G24460,AT1G26830,AT1G30210,AT1G30610,AT1G30810,AT1G30970,AT1G31814,AT1G31880,AT1G32440,AT1G33280,AT1G43850,AT1G50460,AT1G53910,AT1G54830,AT1G56260,AT1G56560,AT1G59820,AT1G64625,AT1G65380,AT1G65470,AT1G65570…
GO:BP	multicellular organism development	GO:0007275	1.28523e-09	8.89102	2672	1203	221	23012	AT1G03120,AT1G03840,AT1G05830,AT1G05850,AT1G05960,AT1G06150,AT1G07890,AT1G08090,AT1G08620,AT1G09330,AT1G10130,AT1G12470,AT1G13870,AT1G15750,AT1G16300,AT1G17730,AT1G18100,AT1G18640,AT1G18750,AT1G19080,AT1G20823,AT1G22770,AT1G23290,AT1G24460,AT1G26830,AT1G27950,AT1G28080,AT1G30210,AT1G30610,AT1G30810,AT1G30970,AT1G31814,AT1G31880,AT1G32440,AT1G33280,AT1G42470,AT1G43850,AT1G50460,AT1G53090,AT1G53910…
GO:BP	multicellular organismal process	GO:0032501	2.88917e-08	7.53923	2950	1203	233	23012	AT1G03120,AT1G03840,AT1G05830,AT1G05850,AT1G05960,AT1G06150,AT1G07890,AT1G08090,AT1G08620,AT1G09330,AT1G10130,AT1G12470,AT1G13870,AT1G15750,AT1G16300,AT1G17730,AT1G18100,AT1G18640,AT1G18750,AT1G19080,AT1G20823,AT1G22770,AT1G23290,AT1G24460,AT1G25450,AT1G26830,AT1G27470,AT1G27950,AT1G28080,AT1G30210,AT1G30610,AT1G30810,AT1G30970,AT1G31814,AT1G31880,AT1G32440,AT1G33280,AT1G42470,AT1G43850,AT1G50460…
GO:BP	anatomical structure development	GO:0048856	3.31259e-08	7.47983	3131	1203	244	23012	AT1G03120,AT1G03840,AT1G05830,AT1G05850,AT1G05960,AT1G06150,AT1G07890,AT1G08090,AT1G08620,AT1G09330,AT1G10130,AT1G12470,AT1G13870,AT1G15750,AT1G16300,AT1G17730,AT1G18100,AT1G18640,AT1G18750,AT1G19080,AT1G20823,AT1G22770,AT1G23290,AT1G24460,AT1G25450,AT1G26830,AT1G27470,AT1G27950,AT1G28080,AT1G30210,AT1G30610,AT1G30810,AT1G30970,AT1G31814,AT1G31880,AT1G32440,AT1G33280,AT1G42470,AT1G43850,AT1G50460…
GO:BP	biological regulation	GO:0065007	9.534e-08	7.02072	6669	1203	449	23012	AT1G01010,AT1G02980,AT1G03120,AT1G03290,AT1G03840,AT1G05160,AT1G05830,AT1G05850,AT1G06150,AT1G06290,AT1G06310,AT1G06760,AT1G07500,AT1G08620,AT1G09250,AT1G09415,AT1G10120,AT1G10130,AT1G10630,AT1G11362,AT1G11755,AT1G11960,AT1G13870,AT1G15750,AT1G16300,AT1G16490,AT1G16710,AT1G16920,AT1G17455,AT1G18100,AT1G18150,AT1G18670,AT1G18750,AT1G18950,AT1G20260,AT1G20693,AT1G20823,AT1G22280,AT1G22770,AT1G22810…
GO:BP	developmental process	GO:0032502	1.459e-07	6.83595	3292	1203	251	23012	AT1G03120,AT1G03840,AT1G05830,AT1G05850,AT1G05960,AT1G06150,AT1G07890,AT1G08090,AT1G08620,AT1G09330,AT1G10130,AT1G12470,AT1G13870,AT1G15750,AT1G16300,AT1G17730,AT1G18100,AT1G18640,AT1G18750,AT1G19080,AT1G20580,AT1G20823,AT1G22770,AT1G23290,AT1G24460,AT1G25450,AT1G26830,AT1G27470,AT1G27950,AT1G28080,AT1G30210,AT1G30610,AT1G30810,AT1G30970,AT1G31814,AT1G31880,AT1G32440,AT1G33280,AT1G42470,AT1G43850…
GO:BP	establishment of localization	GO:0051234	1.71092e-07	6.76677	2716	1203	215	23012	AT1G06470,AT1G08090,AT1G08960,AT1G09270,AT1G09330,AT1G10130,AT1G10630,AT1G11890,AT1G11960,AT1G12470,AT1G13310,AT1G14560,AT1G14730,AT1G16920,AT1G17730,AT1G20260,AT1G20823,AT1G22540,AT1G23490,AT1G23900,AT1G24460,AT1G24706,AT1G27350,AT1G27950,AT1G29060,AT1G30410,AT1G30560,AT1G31120,AT1G31880,AT1G32090,AT1G42470,AT1G43890,AT1G47395,AT1G47400,AT1G47830,AT1G49180,AT1G50500,AT1G50740,AT1G52280,AT1G53390…
GO:BP	transport	GO:0006810	1.94012e-07	6.71217	2672	1203	212	23012	AT1G06470,AT1G08090,AT1G08960,AT1G09270,AT1G09330,AT1G10130,AT1G10630,AT1G11890,AT1G11960,AT1G12470,AT1G13310,AT1G14560,AT1G14730,AT1G16920,AT1G17730,AT1G20260,AT1G20823,AT1G22540,AT1G23490,AT1G23900,AT1G24460,AT1G24706,AT1G27350,AT1G27950,AT1G29060,AT1G30410,AT1G30560,AT1G31120,AT1G31880,AT1G32090,AT1G42470,AT1G43890,AT1G47395,AT1G47400,AT1G47830,AT1G49180,AT1G50500,AT1G50740,AT1G52280,AT1G53390…
GO:BP	intracellular transport	GO:0046907	4.26094e-07	6.37049	735	1203	80	23012	AT1G09270,AT1G09330,AT1G10630,AT1G11890,AT1G12470,AT1G16920,AT1G17730,AT1G23490,AT1G23900,AT1G24460,AT1G24706,AT1G43890,AT1G47830,AT1G50500,AT1G60780,AT1G64220,AT1G67120,AT1G70490,AT1G71270,AT1G73430,AT1G77140,AT2G05170,AT2G16950,AT2G17380,AT2G19080,AT2G21660,AT2G27460,AT2G28900,AT2G37975,AT2G42810,AT2G43130,AT3G03160,AT3G03490,AT3G05040,AT3G05230,AT3G05710,AT3G07100,AT3G07680,AT3G10380,AT3G11130…
GO:BP	establishment of localization in cell	GO:0051649	7.16306e-07	6.1449	783	1203	83	23012	AT1G09270,AT1G09330,AT1G10630,AT1G11890,AT1G12470,AT1G16920,AT1G17730,AT1G23490,AT1G23900,AT1G24460,AT1G24706,AT1G43890,AT1G47830,AT1G50500,AT1G60780,AT1G64220,AT1G66840,AT1G67120,AT1G70490,AT1G71270,AT1G73430,AT1G77140,AT2G05170,AT2G16950,AT2G17380,AT2G19080,AT2G21660,AT2G27460,AT2G28900,AT2G37975,AT2G42810,AT2G43130,AT3G03160,AT3G03490,AT3G05040,AT3G05230,AT3G05710,AT3G05750,AT3G07100,AT3G07680…
GO:BP	localization	GO:0051179	1.01736e-06	5.99253	2949	1203	226	23012	AT1G03840,AT1G06470,AT1G08090,AT1G08960,AT1G09270,AT1G09330,AT1G10130,AT1G10630,AT1G11890,AT1G11960,AT1G12470,AT1G12730,AT1G13310,AT1G14560,AT1G14730,AT1G15290,AT1G16920,AT1G17730,AT1G20260,AT1G20823,AT1G22540,AT1G23490,AT1G23900,AT1G24460,AT1G24706,AT1G27350,AT1G27950,AT1G29060,AT1G30410,AT1G30560,AT1G31120,AT1G31880,AT1G32090,AT1G42470,AT1G43890,AT1G47395,AT1G47400,AT1G47830,AT1G49180,AT1G50500…
GO:BP	vesicle-mediated transport	GO:0016192	1.05687e-06	5.97598	530	1203	63	23012	AT1G09330,AT1G10630,AT1G11890,AT1G12470,AT1G13310,AT1G16920,AT1G17730,AT1G23490,AT1G23900,AT1G24460,AT1G29060,AT1G47830,AT1G50500,AT1G54090,AT1G55190,AT1G59820,AT1G60780,AT1G62880,AT1G70490,AT1G71270,AT1G71820,AT1G73430,AT1G77140,AT2G05170,AT2G17380,AT2G18240,AT2G27460,AT2G37975,AT2G43130,AT3G03160,AT3G05710,AT3G07100,AT3G07680,AT3G09900,AT3G10380,AT3G11130,AT3G15380,AT3G19770,AT3G23340,AT3G43300…
GO:BP	shoot system development	GO:0048367	6.63902e-06	5.1779	988	1203	95	23012	AT1G08620,AT1G13870,AT1G15750,AT1G20823,AT1G22770,AT1G23290,AT1G26830,AT1G30210,AT1G30970,AT1G31814,AT1G43850,AT1G56260,AT1G59820,AT1G65470,AT1G68130,AT1G76500,AT1G79530,AT2G01570,AT2G17070,AT2G18380,AT2G19730,AT2G23630,AT2G25625,AT2G27460,AT2G33860,AT2G35270,AT2G39940,AT2G40750,AT2G42540,AT2G45660,AT3G01090,AT3G02260,AT3G02780,AT3G05040,AT3G11540,AT3G15010,AT3G15380,AT3G19980,AT3G22170,AT3G23980…
GO:BP	macromolecule localization	GO:0033036	6.71905e-06	5.17269	1291	1203	116	23012	AT1G03840,AT1G09270,AT1G09330,AT1G10630,AT1G11890,AT1G12470,AT1G12730,AT1G16920,AT1G17730,AT1G23490,AT1G23900,AT1G24460,AT1G24706,AT1G27350,AT1G27950,AT1G29060,AT1G42470,AT1G43890,AT1G47830,AT1G49180,AT1G50500,AT1G50740,AT1G52280,AT1G53590,AT1G54090,AT1G54710,AT1G59820,AT1G60780,AT1G64220,AT1G70490,AT1G71270,AT1G71960,AT1G73430,AT1G77140,AT2G04940,AT2G05170,AT2G05630,AT2G06925,AT2G16950,AT2G17380…
GO:BP	cellular localization	GO:0051641	1.81028e-05	4.74225	1255	1203	112	23012	AT1G03840,AT1G09270,AT1G09330,AT1G10630,AT1G11890,AT1G12470,AT1G12730,AT1G16920,AT1G17730,AT1G23490,AT1G23900,AT1G24460,AT1G24706,AT1G27350,AT1G29060,AT1G43890,AT1G47830,AT1G49180,AT1G50500,AT1G52280,AT1G54090,AT1G54710,AT1G59820,AT1G60780,AT1G64220,AT1G66840,AT1G67120,AT1G70490,AT1G71270,AT1G73430,AT1G77140,AT2G05170,AT2G05630,AT2G16950,AT2G17380,AT2G18240,AT2G19080,AT2G21410,AT2G21660,AT2G27460…
GO:BP	response to stimulus	GO:0050896	2.00421e-05	4.69806	6382	1203	419	23012	AT1G01120,AT1G02980,AT1G03120,AT1G03840,AT1G05850,AT1G07500,AT1G07650,AT1G07890,AT1G08090,AT1G09270,AT1G09415,AT1G10120,AT1G11755,AT1G11780,AT1G11960,AT1G12210,AT1G12220,AT1G13430,AT1G13609,AT1G15750,AT1G15890,AT1G16190,AT1G16490,AT1G16920,AT1G17170,AT1G17455,AT1G18100,AT1G18150,AT1G18490,AT1G18670,AT1G19200,AT1G19920,AT1G20823,AT1G22280,AT1G22770,AT1G22810,AT1G24190,AT1G24460,AT1G25450,AT1G26830…
GO:BP	regulation of biological process	GO:0050789	2.84614e-05	4.54574	5936	1203	393	23012	AT1G01010,AT1G02980,AT1G03290,AT1G03840,AT1G05830,AT1G05850,AT1G06150,AT1G06760,AT1G07500,AT1G08620,AT1G09250,AT1G09415,AT1G10120,AT1G11755,AT1G11960,AT1G13870,AT1G15750,AT1G16490,AT1G16710,AT1G16920,AT1G17455,AT1G18100,AT1G18150,AT1G18670,AT1G18750,AT1G18950,AT1G20260,AT1G20693,AT1G20823,AT1G22280,AT1G22770,AT1G22810,AT1G24190,AT1G24460,AT1G24706,AT1G26540,AT1G26830,AT1G27350,AT1G27630,AT1G29060…
GO:BP	establishment of protein localization	GO:0045184	3.00543e-05	4.52209	835	1203	82	23012	AT1G09270,AT1G09330,AT1G10630,AT1G11890,AT1G12470,AT1G16920,AT1G17730,AT1G23490,AT1G23900,AT1G24460,AT1G27350,AT1G29060,AT1G43890,AT1G47830,AT1G49180,AT1G50500,AT1G52280,AT1G54090,AT1G54710,AT1G59820,AT1G60780,AT1G64220,AT1G70490,AT1G71270,AT1G73430,AT1G77140,AT2G05170,AT2G05630,AT2G16950,AT2G17380,AT2G19080,AT2G27460,AT2G28900,AT2G37975,AT2G43130,AT2G45170,AT3G03160,AT3G03490,AT3G05040,AT3G05230…
GO:BP	protein transport	GO:0015031	3.32508e-05	4.4782	823	1203	81	23012	AT1G09270,AT1G09330,AT1G10630,AT1G11890,AT1G12470,AT1G16920,AT1G17730,AT1G23490,AT1G23900,AT1G24460,AT1G27350,AT1G29060,AT1G43890,AT1G47830,AT1G49180,AT1G50500,AT1G52280,AT1G54090,AT1G54710,AT1G59820,AT1G60780,AT1G64220,AT1G70490,AT1G71270,AT1G73430,AT1G77140,AT2G05170,AT2G05630,AT2G16950,AT2G17380,AT2G19080,AT2G27460,AT2G28900,AT2G37975,AT2G43130,AT2G45170,AT3G03160,AT3G03490,AT3G05040,AT3G05230…
GO:BP	organic substance transport	GO:0071702	3.75911e-05	4.42492	1452	1203	124	23012	AT1G06470,AT1G09270,AT1G09330,AT1G10630,AT1G11890,AT1G12470,AT1G14560,AT1G16920,AT1G17730,AT1G22540,AT1G23490,AT1G23900,AT1G24460,AT1G24706,AT1G27350,AT1G27950,AT1G29060,AT1G30560,AT1G42470,AT1G43890,AT1G47830,AT1G49180,AT1G50500,AT1G50740,AT1G52280,AT1G53590,AT1G54090,AT1G54710,AT1G59820,AT1G60780,AT1G64220,AT1G70490,AT1G71270,AT1G71960,AT1G72130,AT1G73430,AT1G77140,AT2G03590,AT2G04940,AT2G05170…
GO:BP	nitrogen compound transport	GO:0071705	4.04596e-05	4.39298	1156	1203	104	23012	AT1G06470,AT1G08090,AT1G09270,AT1G09330,AT1G10630,AT1G11890,AT1G12470,AT1G14560,AT1G16920,AT1G17730,AT1G22540,AT1G23490,AT1G23900,AT1G24460,AT1G24706,AT1G27350,AT1G29060,AT1G43890,AT1G47830,AT1G49180,AT1G50500,AT1G52280,AT1G54090,AT1G54710,AT1G59820,AT1G60780,AT1G64220,AT1G70490,AT1G71270,AT1G72130,AT1G73430,AT1G77140,AT2G03590,AT2G05170,AT2G05630,AT2G16950,AT2G17380,AT2G19080,AT2G21660,AT2G24762…
GO:BP	response to abiotic stimulus	GO:0009628	4.24617e-05	4.372	2170	1203	170	23012	AT1G01120,AT1G05850,AT1G07890,AT1G10120,AT1G11755,AT1G16490,AT1G16920,AT1G17455,AT1G18490,AT1G20823,AT1G22280,AT1G22770,AT1G22810,AT1G24460,AT1G25450,AT1G26830,AT1G28210,AT1G29060,AT1G29910,AT1G30810,AT1G33890,AT1G43850,AT1G49510,AT1G50460,AT1G50500,AT1G50740,AT1G52690,AT1G53090,AT1G53620,AT1G53910,AT1G54830,AT1G56260,AT1G66730,AT1G66840,AT1G68130,AT1G68840,AT1G70200,AT1G71960,AT1G72370,AT1G76500…
GO:BP	regulation of cellular process	GO:0050794	9.4909e-05	4.02269	5130	1203	344	23012	AT1G01010,AT1G02980,AT1G03290,AT1G03840,AT1G05830,AT1G05850,AT1G06150,AT1G06760,AT1G07500,AT1G08620,AT1G09250,AT1G10120,AT1G11755,AT1G11960,AT1G13870,AT1G15750,AT1G16490,AT1G16710,AT1G16920,AT1G18100,AT1G18150,AT1G18670,AT1G18750,AT1G18950,AT1G20260,AT1G20693,AT1G22280,AT1G22770,AT1G22810,AT1G24190,AT1G24460,AT1G27350,AT1G27630,AT1G30210,AT1G30810,AT1G30970,AT1G31880,AT1G33280,AT1G33890,AT1G42470…
GO:BP	macromolecule modification	GO:0043412	0.000199813	3.69938	3257	1203	233	23012	AT1G02980,AT1G03150,AT1G04360,AT1G04860,AT1G05830,AT1G07650,AT1G08620,AT1G10490,AT1G11755,AT1G11780,AT1G12730,AT1G13870,AT1G14470,AT1G16710,AT1G18150,AT1G18490,AT1G18670,AT1G20270,AT1G20823,AT1G22280,AT1G24190,AT1G25390,AT1G26830,AT1G27350,AT1G27630,AT1G28120,AT1G29710,AT1G30000,AT1G30970,AT1G31600,AT1G32750,AT1G34300,AT1G45160,AT1G48140,AT1G48480,AT1G48490,AT1G49160,AT1G49180,AT1G49730,AT1G50370…
GO:BP	protein localization	GO:0008104	0.00021463	3.66831	1004	1203	91	23012	AT1G03840,AT1G09270,AT1G09330,AT1G10630,AT1G11890,AT1G12470,AT1G12730,AT1G16920,AT1G17730,AT1G23490,AT1G23900,AT1G24460,AT1G27350,AT1G29060,AT1G43890,AT1G47830,AT1G49180,AT1G50500,AT1G52280,AT1G54090,AT1G54710,AT1G59820,AT1G60780,AT1G64220,AT1G70490,AT1G71270,AT1G73430,AT1G77140,AT2G05170,AT2G05630,AT2G16950,AT2G17380,AT2G18240,AT2G19080,AT2G27460,AT2G28900,AT2G37975,AT2G43130,AT2G45170,AT3G03160…
GO:BP	primary metabolic process	GO:0044238	0.000250614	3.60099	11856	1203	705	23012	AT1G01010,AT1G01120,AT1G01600,AT1G02980,AT1G03150,AT1G03290,AT1G03840,AT1G04360,AT1G04860,AT1G04910,AT1G05160,AT1G05830,AT1G05850,AT1G06120,AT1G06150,AT1G06290,AT1G06310,AT1G06760,AT1G07500,AT1G07650,AT1G07940,AT1G08620,AT1G09250,AT1G10040,AT1G10120,AT1G10490,AT1G10900,AT1G11755,AT1G11780,AT1G12650,AT1G12730,AT1G13870,AT1G14205,AT1G14250,AT1G14470,AT1G14570,AT1G15710,AT1G15750,AT1G16190,AT1G16300…
GO:BP	cellular metabolic process	GO:0044237	0.000258824	3.587	11357	1203	679	23012	AT1G01010,AT1G01120,AT1G01600,AT1G02980,AT1G03290,AT1G03840,AT1G04860,AT1G05160,AT1G05830,AT1G05850,AT1G06120,AT1G06150,AT1G06290,AT1G06310,AT1G06760,AT1G07500,AT1G07650,AT1G07890,AT1G07940,AT1G08090,AT1G08620,AT1G09250,AT1G10040,AT1G10120,AT1G10490,AT1G10900,AT1G10960,AT1G11755,AT1G11780,AT1G12650,AT1G12730,AT1G13430,AT1G13870,AT1G14205,AT1G14250,AT1G14470,AT1G14570,AT1G15710,AT1G15750,AT1G16190…
GO:BP	intracellular protein transport	GO:0006886	0.000368765	3.43325	512	1203	55	23012	AT1G09270,AT1G10630,AT1G12470,AT1G16920,AT1G23490,AT1G23900,AT1G24460,AT1G43890,AT1G47830,AT1G60780,AT1G64220,AT1G70490,AT1G73430,AT1G77140,AT2G05170,AT2G16950,AT2G17380,AT2G19080,AT2G27460,AT2G28900,AT2G43130,AT3G03160,AT3G03490,AT3G05040,AT3G05230,AT3G05710,AT3G07100,AT3G07680,AT3G10380,AT3G11130,AT3G27080,AT3G43300,AT3G44340,AT3G47520,AT3G50380,AT3G56930,AT4G01810,AT4G15810,AT4G17140,AT4G17730…
GO:BP	ribosomal small subunit biogenesis	GO:0042274	0.000691132	3.16044	89	1203	18	23012	AT1G10490,AT1G12650,AT1G48830,AT1G69070,AT1G72370,AT2G37270,AT3G06530,AT3G10090,AT3G11510,AT3G52580,AT3G53890,AT3G57940,AT4G12600,AT5G09510,AT5G17930,AT5G47930,AT5G61170,AT5G64140
GO:BP	Golgi vesicle transport	GO:0048193	0.000725352	3.13945	190	1203	28	23012	AT1G11890,AT1G23900,AT1G50500,AT1G59820,AT1G60780,AT1G71270,AT1G73430,AT2G18240,AT2G27460,AT2G37975,AT2G43130,AT3G03160,AT3G05710,AT3G07100,AT3G07680,AT3G10380,AT3G44340,AT4G01810,AT4G02030,AT4G14455,AT4G19490,AT4G24550,AT4G34450,AT4G39220,AT5G39500,AT5G48660,AT5G52210,AT5G58030
GO:BP	cellular macromolecule localization	GO:0070727	0.000744825	3.12795	1033	1203	91	23012	AT1G03840,AT1G09270,AT1G09330,AT1G10630,AT1G11890,AT1G12470,AT1G12730,AT1G16920,AT1G17730,AT1G23490,AT1G23900,AT1G24460,AT1G27350,AT1G29060,AT1G43890,AT1G47830,AT1G49180,AT1G50500,AT1G52280,AT1G54090,AT1G54710,AT1G59820,AT1G60780,AT1G64220,AT1G70490,AT1G71270,AT1G73430,AT1G77140,AT2G05170,AT2G05630,AT2G16950,AT2G17380,AT2G18240,AT2G19080,AT2G27460,AT2G28900,AT2G37975,AT2G43130,AT2G45170,AT3G03160…
GO:BP	regulation of developmental process	GO:0050793	0.00130735	2.88361	798	1203	74	23012	AT1G03840,AT1G08620,AT1G18100,AT1G18750,AT1G20823,AT1G22770,AT1G24460,AT1G26830,AT1G30210,AT1G30970,AT1G31880,AT1G43850,AT1G53910,AT1G54830,AT1G65380,AT1G65470,AT1G67120,AT1G67710,AT1G71960,AT1G77140,AT2G01570,AT2G15230,AT2G16365,AT2G18740,AT2G25170,AT2G36850,AT2G39940,AT2G40750,AT2G45660,AT2G47270,AT3G01090,AT3G02170,AT3G05040,AT3G06500,AT3G15380,AT3G17609,AT3G19980,AT3G22170,AT3G24870,AT3G29035…
GO:BP	root morphogenesis	GO:0010015	0.0014858	2.82804	327	1203	39	23012	AT1G05850,AT1G12470,AT1G24460,AT1G31880,AT1G50460,AT1G65380,AT1G67710,AT1G71090,AT1G77140,AT2G35510,AT2G42490,AT2G45420,AT3G02260,AT3G06440,AT3G11600,AT3G43300,AT3G54610,AT3G56930,AT4G00150,AT4G07410,AT4G13510,AT4G16780,AT4G21060,AT4G26540,AT4G28980,AT4G38630,AT5G06600,AT5G09680,AT5G18560,AT5G19700,AT5G24740,AT5G41950,AT5G43900,AT5G55920,AT5G56040,AT5G56320,AT5G63220,AT5G64070,AT5G64800
GO:BP	organic substance metabolic process	GO:0071704	0.00149871	2.82428	12650	1203	740	23012	AT1G01010,AT1G01120,AT1G01600,AT1G02980,AT1G03150,AT1G03290,AT1G03840,AT1G04360,AT1G04860,AT1G04910,AT1G05160,AT1G05830,AT1G05850,AT1G06120,AT1G06150,AT1G06290,AT1G06310,AT1G06760,AT1G07500,AT1G07650,AT1G07890,AT1G07940,AT1G08090,AT1G08620,AT1G09250,AT1G10040,AT1G10120,AT1G10490,AT1G10900,AT1G11755,AT1G11780,AT1G12650,AT1G12730,AT1G13870,AT1G14205,AT1G14250,AT1G14470,AT1G14570,AT1G15710,AT1G15750…
GO:BP	plant organ morphogenesis	GO:1905392	0.00155624	2.80792	469	1203	50	23012	AT1G05850,AT1G12470,AT1G24460,AT1G31880,AT1G50460,AT1G65380,AT1G67710,AT1G68130,AT1G71090,AT1G77140,AT2G19730,AT2G35510,AT2G42490,AT2G45420,AT3G02260,AT3G05040,AT3G06440,AT3G11600,AT3G23980,AT3G25430,AT3G43300,AT3G49720,AT3G52770,AT3G54610,AT3G56930,AT3G63010,AT4G00100,AT4G00150,AT4G07410,AT4G13510,AT4G16780,AT4G21060,AT4G26540,AT4G28980,AT4G38630,AT4G39400,AT5G06600,AT5G09680,AT5G16780,AT5G18560…
GO:BP	cellular response to stimulus	GO:0051716	0.00251299	2.59981	3315	1203	230	23012	AT1G01120,AT1G02980,AT1G03840,AT1G05850,AT1G07500,AT1G07890,AT1G08090,AT1G11755,AT1G11780,AT1G11960,AT1G12220,AT1G15750,AT1G16190,AT1G18100,AT1G18150,AT1G18490,AT1G18670,AT1G19200,AT1G19920,AT1G20823,AT1G22280,AT1G22770,AT1G22810,AT1G27350,AT1G30000,AT1G31760,AT1G31880,AT1G33890,AT1G35620,AT1G43850,AT1G45160,AT1G48490,AT1G49160,AT1G49510,AT1G50670,AT1G50740,AT1G51950,AT1G52260,AT1G53090,AT1G53620…
GO:BP	phyllome development	GO:0048827	0.00263896	2.57857	559	1203	56	23012	AT1G08620,AT1G13870,AT1G30210,AT1G43850,AT1G65470,AT1G68130,AT1G79530,AT2G01570,AT2G19730,AT2G25625,AT2G27460,AT2G35270,AT2G39940,AT2G40750,AT2G42540,AT3G01090,AT3G05040,AT3G15010,AT3G15380,AT3G22170,AT3G23980,AT3G28860,AT3G29035,AT3G44680,AT3G48520,AT3G49720,AT3G52770,AT3G54220,AT3G62080,AT4G00100,AT4G01810,AT4G07410,AT4G12570,AT4G15090,AT4G23640,AT4G24560,AT4G27950,AT4G36930,AT4G38630,AT4G38680…
GO:BP	regulation of biological quality	GO:0065008	0.00320113	2.4947	950	1203	83	23012	AT1G03120,AT1G05160,AT1G06290,AT1G06310,AT1G10130,AT1G16300,AT1G20260,AT1G29060,AT1G30560,AT1G31300,AT1G31880,AT1G44835,AT1G47330,AT1G50460,AT1G52690,AT1G59820,AT1G60960,AT1G68130,AT1G68650,AT1G71090,AT1G75500,AT1G77140,AT1G77680,AT1G78100,AT1G79530,AT2G04940,AT2G18720,AT2G19860,AT2G21410,AT2G25170,AT2G27150,AT2G28520,AT2G33860,AT2G41240,AT2G41510,AT2G42540,AT3G02040,AT3G02260,AT3G02580,AT3G06610…
GO:BP	auxin transport	GO:0060918	0.00352403	2.45296	129	1203	21	23012	AT1G31880,AT1G59820,AT1G68130,AT1G71090,AT1G75500,AT1G77140,AT1G78100,AT3G02260,AT3G15380,AT3G25540,AT3G28860,AT3G43300,AT3G51670,AT4G07410,AT4G13750,AT4G30960,AT5G01240,AT5G01990,AT5G13750,AT5G60440,AT5G65980
GO:BP	post-embryonic development	GO:0009791	0.00388233	2.41091	1633	1203	127	23012	AT1G03120,AT1G05830,AT1G07890,AT1G08090,AT1G15750,AT1G17730,AT1G18100,AT1G18640,AT1G19080,AT1G20823,AT1G22770,AT1G23290,AT1G26830,AT1G30610,AT1G30810,AT1G30970,AT1G31814,AT1G31880,AT1G32440,AT1G43850,AT1G53090,AT1G54830,AT1G62720,AT1G64625,AT1G66730,AT1G68130,AT1G71090,AT1G71960,AT1G76500,AT1G79530,AT2G01570,AT2G15230,AT2G16365,AT2G17250,AT2G17820,AT2G18380,AT2G21660,AT2G23630,AT2G25170,AT2G27460…
GO:BP	leaf development	GO:0048366	0.00489078	2.31062	395	1203	43	23012	AT1G08620,AT1G13870,AT1G30210,AT1G65470,AT1G68130,AT2G01570,AT2G19730,AT2G25625,AT2G40750,AT2G42540,AT3G01090,AT3G05040,AT3G15010,AT3G15380,AT3G22170,AT3G23980,AT3G29035,AT3G44680,AT3G49720,AT3G52770,AT3G54220,AT3G62080,AT4G00100,AT4G07410,AT4G12570,AT4G15090,AT4G23640,AT4G24560,AT4G27950,AT4G38630,AT4G39400,AT5G01600,AT5G02410,AT5G08560,AT5G16780,AT5G19700,AT5G22070,AT5G27150,AT5G43900,AT5G44160…
GO:BP	reproductive shoot system development	GO:0090567	0.00498187	2.30261	557	1203	55	23012	AT1G20823,AT1G22770,AT1G23290,AT1G26830,AT1G30970,AT1G31814,AT1G43850,AT1G68130,AT1G76500,AT1G79530,AT2G18380,AT2G23630,AT2G27460,AT2G33860,AT2G35270,AT2G39940,AT2G45660,AT3G02260,AT3G02780,AT3G05040,AT3G11540,AT3G19980,AT3G23980,AT3G24870,AT3G28860,AT3G48520,AT3G54610,AT3G55510,AT3G57670,AT3G63010,AT3G63070,AT4G01810,AT4G02560,AT4G03090,AT4G04885,AT4G14900,AT4G15248,AT4G15880,AT4G22140,AT4G24560…
GO:BP	hormone transport	GO:0009914	0.00512661	2.29017	132	1203	21	23012	AT1G31880,AT1G59820,AT1G68130,AT1G71090,AT1G75500,AT1G77140,AT1G78100,AT3G02260,AT3G15380,AT3G25540,AT3G28860,AT3G43300,AT3G51670,AT4G07410,AT4G13750,AT4G30960,AT5G01240,AT5G01990,AT5G13750,AT5G60440,AT5G65980
GO:BP	flower development	GO:0009908	0.00520165	2.28386	544	1203	54	23012	AT1G20823,AT1G22770,AT1G23290,AT1G26830,AT1G30970,AT1G31814,AT1G43850,AT1G68130,AT1G76500,AT1G79530,AT2G18380,AT2G23630,AT2G27460,AT2G33860,AT2G35270,AT2G39940,AT2G45660,AT3G02780,AT3G05040,AT3G11540,AT3G19980,AT3G23980,AT3G24870,AT3G28860,AT3G48520,AT3G54610,AT3G55510,AT3G57670,AT3G63010,AT3G63070,AT4G01810,AT4G02560,AT4G03090,AT4G04885,AT4G14900,AT4G15248,AT4G15880,AT4G22140,AT4G24560,AT4G29830…
GO:BP	protein modification process	GO:0036211	0.00535943	2.27088	2892	1203	203	23012	AT1G02980,AT1G03150,AT1G04360,AT1G04860,AT1G05830,AT1G07650,AT1G08620,AT1G11755,AT1G12730,AT1G16710,AT1G18150,AT1G18490,AT1G18670,AT1G20270,AT1G20823,AT1G22280,AT1G24190,AT1G25390,AT1G26830,AT1G27350,AT1G27630,AT1G28120,AT1G30000,AT1G30970,AT1G32750,AT1G34300,AT1G45160,AT1G48140,AT1G48480,AT1G48490,AT1G49160,AT1G49180,AT1G49730,AT1G50370,AT1G50670,AT1G51590,AT1G53090,AT1G53280,AT1G54840,AT1G61420…
GO:BP	metabolic process	GO:0008152	0.00546771	2.26219	13560	1203	782	23012	AT1G01010,AT1G01120,AT1G01600,AT1G02980,AT1G03150,AT1G03290,AT1G03840,AT1G04360,AT1G04860,AT1G04910,AT1G05160,AT1G05830,AT1G05850,AT1G06120,AT1G06150,AT1G06290,AT1G06310,AT1G06760,AT1G07500,AT1G07650,AT1G07890,AT1G07940,AT1G08090,AT1G08620,AT1G09250,AT1G10040,AT1G10120,AT1G10490,AT1G10900,AT1G10960,AT1G11755,AT1G11780,AT1G12650,AT1G12730,AT1G13430,AT1G13870,AT1G14205,AT1G14250,AT1G14470,AT1G14570…
GO:BP	nitrogen compound metabolic process	GO:0006807	0.00705898	2.15126	10486	1203	622	23012	AT1G01010,AT1G02980,AT1G03150,AT1G03290,AT1G03840,AT1G04360,AT1G04860,AT1G05830,AT1G05850,AT1G06150,AT1G06760,AT1G07500,AT1G07650,AT1G07940,AT1G08090,AT1G08620,AT1G09250,AT1G10120,AT1G10490,AT1G11755,AT1G11780,AT1G12650,AT1G12730,AT1G13870,AT1G14205,AT1G14250,AT1G14470,AT1G14570,AT1G15710,AT1G15750,AT1G16190,AT1G16300,AT1G16490,AT1G16710,AT1G17170,AT1G17220,AT1G18150,AT1G18280,AT1G18490,AT1G18640…
GO:BP	response to red or far red light	GO:0009639	0.0086259	2.0642	239	1203	30	23012	AT1G22280,AT1G22770,AT1G26830,AT1G53090,AT1G54830,AT1G76500,AT2G01570,AT2G16365,AT2G24540,AT2G31360,AT2G39940,AT2G42540,AT2G42810,AT2G46790,AT3G02260,AT3G15354,AT3G17609,AT3G22170,AT3G27690,AT3G28860,AT3G43810,AT3G61850,AT4G10180,AT4G15090,AT4G16780,AT4G25260,AT4G36930,AT4G37470,AT5G56550,AT5G63440
GO:BP	cell communication	GO:0007154	0.0165764	1.78051	2222	1203	160	23012	AT1G02980,AT1G03840,AT1G05850,AT1G11755,AT1G11960,AT1G15750,AT1G18100,AT1G18150,AT1G18670,AT1G19920,AT1G22280,AT1G22770,AT1G22810,AT1G27350,AT1G31880,AT1G33890,AT1G45160,AT1G48490,AT1G49160,AT1G50670,AT1G51950,AT1G53090,AT1G53910,AT1G54830,AT1G55920,AT1G63500,AT1G65190,AT1G65250,AT1G65390,AT1G67120,AT1G67710,AT1G68840,AT1G71090,AT1G71820,AT1G71960,AT1G73000,AT1G73670,AT1G75500,AT1G77140,AT1G78100…
GO:BP	cellular component organization or biogenesis	GO:0071840	0.0204887	1.68849	3433	1203	231	23012	AT1G03870,AT1G04200,AT1G05830,AT1G06760,AT1G07500,AT1G08620,AT1G09330,AT1G10490,AT1G11890,AT1G12470,AT1G12650,AT1G15290,AT1G16490,AT1G16710,AT1G18750,AT1G19940,AT1G20260,AT1G20580,AT1G20693,AT1G24460,AT1G26880,AT1G29250,AT1G30475,AT1G30610,AT1G30680,AT1G30810,AT1G31760,AT1G32750,AT1G33280,AT1G41880,AT1G42470,AT1G48830,AT1G49510,AT1G50410,AT1G50500,AT1G52080,AT1G56260,AT1G59820,AT1G60000,AT1G63980…
GO:BP	macromolecule metabolic process	GO:0043170	0.0246982	1.60733	9932	1203	588	23012	AT1G01010,AT1G02980,AT1G03150,AT1G03290,AT1G03840,AT1G04360,AT1G04860,AT1G05830,AT1G05850,AT1G06150,AT1G06760,AT1G07500,AT1G07650,AT1G07940,AT1G08620,AT1G09250,AT1G10120,AT1G10490,AT1G11755,AT1G11780,AT1G12650,AT1G12730,AT1G13870,AT1G14205,AT1G14470,AT1G14570,AT1G15750,AT1G16190,AT1G16490,AT1G16710,AT1G17220,AT1G18150,AT1G18280,AT1G18490,AT1G18670,AT1G18750,AT1G18950,AT1G19080,AT1G19940,AT1G20270…
GO:BP	signal transduction	GO:0007165	0.032973	1.48184	1986	1203	144	23012	AT1G02980,AT1G03840,AT1G05850,AT1G11755,AT1G11960,AT1G15750,AT1G18100,AT1G18150,AT1G18670,AT1G22280,AT1G22770,AT1G22810,AT1G27350,AT1G31880,AT1G33890,AT1G45160,AT1G48490,AT1G49160,AT1G50670,AT1G51950,AT1G53090,AT1G53910,AT1G54830,AT1G63500,AT1G65190,AT1G65250,AT1G65390,AT1G67120,AT1G67710,AT1G68840,AT1G71090,AT1G71960,AT1G73000,AT1G73670,AT1G75500,AT1G77140,AT1G78100,AT1G78290,AT1G78700,AT2G01570…
GO:BP	regulation of post-embryonic development	GO:0048580	0.034629	1.46056	347	1203	37	23012	AT1G18100,AT1G20823,AT1G22770,AT1G26830,AT1G30970,AT1G43850,AT1G54830,AT1G71960,AT2G01570,AT2G15230,AT2G16365,AT2G25170,AT2G39940,AT2G45660,AT3G05040,AT3G06500,AT3G17609,AT3G19980,AT3G24870,AT3G43810,AT3G44680,AT3G54610,AT4G04885,AT4G15248,AT4G15880,AT4G18550,AT4G22140,AT4G29830,AT4G36930,AT4G38630,AT4G39400,AT5G18560,AT5G24655,AT5G37260,AT5G55630,AT5G60800,AT5G63440
GO:BP	response to oxygen-containing compound	GO:1901700	0.0367592	1.43463	1696	1203	126	23012	AT1G02980,AT1G03840,AT1G05850,AT1G07890,AT1G08090,AT1G11755,AT1G15750,AT1G18100,AT1G18150,AT1G18670,AT1G19200,AT1G22770,AT1G22810,AT1G24190,AT1G24460,AT1G29910,AT1G31880,AT1G43850,AT1G52690,AT1G53860,AT1G54830,AT1G56560,AT1G63500,AT1G65390,AT1G66730,AT1G67120,AT1G67710,AT1G71960,AT1G73000,AT1G76680,AT1G78700,AT2G01570,AT2G15230,AT2G17820,AT2G19860,AT2G21660,AT2G25170,AT2G25625,AT2G28900,AT2G31730…
GO:BP	phosphate-containing compound metabolic process	GO:0006796	0.0496167	1.30437	2202	1203	156	23012	AT1G07650,AT1G10900,AT1G12730,AT1G14250,AT1G16300,AT1G17340,AT1G18150,AT1G18640,AT1G18670,AT1G20260,AT1G22280,AT1G25390,AT1G27630,AT1G30680,AT1G30820,AT1G32440,AT1G34260,AT1G34300,AT1G36280,AT1G45160,AT1G48140,AT1G48480,AT1G48490,AT1G49160,AT1G49180,AT1G49730,AT1G50370,AT1G50460,AT1G53090,AT1G53280,AT1G61420,AT1G63500,AT1G64625,AT1G65190,AT1G65250,AT1G66980,AT1G67510,AT1G67720,AT1G71010,AT1G73000…
KEGG	Ribosome	KEGG:03010	9.17051e-05	4.03761	322	365	47	4985	AT1G23290,AT1G26880,AT1G33140,AT1G41880,AT1G48830,AT1G57860,AT1G72370,AT1G80750,AT2G04390,AT2G19730,AT2G27710,AT2G31610,AT2G32060,AT2G37270,AT2G39390,AT2G43460,AT2G47610,AT3G06700,AT3G07110,AT3G10090,AT3G11120,AT3G11510,AT3G16780,AT3G18740,AT3G28900,AT3G49010,AT3G52580,AT3G53890,AT3G60245,AT4G00100,AT4G17390,AT4G18730,AT4G25890,AT4G31985,AT4G33865,AT5G02870,AT5G02960,AT5G04800,AT5G07090,AT5G09510…
