# Supplementary material for: Key Pathways and Genes of Arabidopsis thaliana and Arabidopsis halleri Roots under Cadmium Stress Responses: Differences and Similarities
Source: Plants (Basel). 2023 Apr 27;12(9):1793. doi: 10.3390/plants12091793 (PMC10180823; doi:10.3390/plants12091793)
Supplement: Supplementary file 1 [file plants-12-01793-s001.zip › Supplementary file S2.xlsx]

## Sheet: Supp Table 2
Table S2: descriptions of the hub genes from modules of interest
MCC for Maximal Clique Centrality. In bold the intersecting genes among hub genes from WGCNA analysis and DEGs
Plum1			Brown			Lightblue4			Antiquewhite1
Gene ID	Description	MCC	Gene ID	Description	MCC	Gene ID	Description	MCC	Gene ID	Description	MCC
A0A059LBT4	C-terminal domain of adenylylcyclase associated protein	44175678	AT3G10500	NAC domain containing protein 2 (NAC2)	19285	AT1G22650	Plant neutral invertase family protein (A/N-InvF)	270596	AT1G54970	Proline-rich protein 1 (PRP1)	979976
A0A067EEF9	26S proteasome non-ATPase regulatory subunit 2 homolog A	37865218	AT3G02250	O-fucosyltransferase family protein	17291	AT1G24090	Polynucleotidyl transferase, ribonuclease H-like superfamily protein	336774	AT2G28410	Transmembrane protein	893510
AIU94816	40S ribosomal protein	57786974	AT3G15550	Trichohyalin	16243	AT1G26540	Agenet domain protein (DOMAIN OF UNKNOWN FUNCTION 724 6, DUF6)	249100	AT3G07320	O-Glycosyl hydrolases family 17 protein	818943
AT1G50370	Flower-specific, phytochrome-associated protein phosphatase 3 (FYPP3)	38097166	AT5G16910.AT1G02730	Cellulose synthase like D5	14789	AT1G36050	Endoplasmic reticulum vescicle transporter protein	227802	AT5G52790	CBS domain protein with a domain protein (DUF21)	759798
AT2G22240	Myo-inositol-1-phosphate synthase 1 (MIPS1)	39714660	AT1G69770	Chromomethylase 3 (CMT3)	14457	AT1G64980	Nucleotide-diphospho-sugar transferases superfamily protein (CDI)	253332	AT5G49270	COBRA-like extracellular glycosyl-phosphatidyl inositol-anchored protein family (SHV2)	746922
AT5G35590	20S proteasome subunit PAA2	44203780	AT2G19170	PA-domain containing subtilase family protein (ALE1)	14451	AT1G66540	Cytochrome P450 superfamily protein	274542	AT5G57625	CAP (Cysteine-rich secretory proteins, Antigen 5, and Pathogenesis-related 1 protein) superfamily protein (ATCAPE5)	745883
AT5G49500	Polyubiquitin 3 (UBQ3)	85032954	AT4G21760	Beta-glucosidase 47 (BGLU47)	14238	AT1G69070	Nucleolar-like protein	242556	AT4G26010	Peroxidase superfamily protein	634546
CAR82270	Ribosomal protein S25 protein	54729024	AT3G14240	Subtilisin-like serine protease 2 (SLP2)	13681	AT1G71210	Pentatricopeptide repeat (PPR) superfamily protein	409908	AT4G28390	Endoplasmic reticulum-adenine nucleotide transporter 1 (ER-ANT1)	592456
CDQ93017	Unnamed protein product	49593088	AT1G71690	Glucuronoxylan 4-O-methyltransferase-like protein (DUF579)	13540	AT1G72200	RING/U-box superfamily protein	268512	AT1G48640	Lysine histidine transporter 1 (LHT1)	559628
CEG63488	60S ribosomal protein L13, putative	50302716	AT2G32260	Phosphorylethanolamine cytidylyltransferase 1 (PECT1)	13528	AT2G19800	Myo-inositol oxygenase 2 (MIOX2)	251644	AT5G21130	Late embryogenesis abundant (LEA) hydroxyproline-rich glycoprotein family	517973
ESA21719	Hypothetical protein GLOINDRAFT_1856	43658510	AT4G03100	RHO-related protein from plants 1 (ROP1)	13458	AT2G28950	Expansin A6 (EXPA6)	297298	AT4G20140	Leucine-rich repeat transmembrane-type receptor kinase, putative (GSO1)	514372
K4CDF4	Coatomer subunit alpha-1-like	37590864	AT4G31840	Early nodulin-like protein 14 (ENDOL14)	13098	AT2G42810	Protein phosphatase 5.2 (PP5.2)	243714	AT2G40480	WEB family protein (DUF827)	497798
NP_172669	Fumarylacetoacetase	45557731	AT3G44050	P-loop containing nucleoside triphosphate hydrolases superfamily protein	13011	AT3G27690	Photosystem II light harvesting complex protein 2.3 (LHCB2.3)	240048	AT2G29750	UDP-glucosyl transferase 71C1 (UGT71C1)	483860
NP_564994	MMS ZWEI homologue 2	48394755	AT5G51600	Microtubule associated protein (MAP65/ASE1) family protein (PLE)	12796	AT3G44680	Histone deacetylase 9 (HDA9)	258986	AT1G32100	Pinoresinol reductase 1 (PRR1)	452138
NP_849678	Ubiquitin-conjugating enzyme 36	66892742	AT5G18700.AT1G33940	Protein kinase family protein with ARM repeat domain	12617	AT3G48550	Shoot gravitropism-like protein	260106	AT3G10080	RmlC-like cupins superfamily protein	443591
NP_850860	Calmodulin 6	50982296	AT4G36180	Leucine-rich receptor-like protein kinase family protein	12352	AT3G52770	Binding protein little zipper 3 (ZPR3)	244352	AT4G11210	Disease resistance-responsive (dirigent-like protein) family protein	442442
XP_001777839	Predicted protein	51823267	AT5G51560	Leucine-rich repeat protein kinase family protein	12331	AT3G53930	Transducin/WD40 repeat-like superfamily protein (LST8-1)	276338	AT4G32880	Homeobox-leucine zipper family protein/lipid-binding START domain-containing protein (ATHB-15)	432958
XP_002503130	Ero1-like protein precursor /fumarate reductase	45644212	AT2G42880	MAP kinase 20 (MPK20)	12188	AT3G58040	Uncharacterized protein (SINAT2)	227802	AT5G57530	Xyloglucan endotransglucosylase/hydrolase 12 (XTH12)	430620
XP_002876595	FUSCA protein FUS6	37395540	AT1G18370	ATP binding microtubule motor family protein (HIK)	11925	AT3G62160	HXXXD-type acyl-transferase family protein	232438	AT3G10710	Plant invertase/pectin methylesterase inhibitor superfamily	424804
XP_002887387	F-actin capping protein beta subunit family protein	46186988	AT2G40130	Double Clp-N motif-containing P-loop nucleoside triphosphate hydrolases superfamily protein	11806	AT4G18550	Alpha/beta-Hydrolases superfamily protein	228158	AT3G56100	Inflorescence meristem receptor-like kinase 2 (IMK2)	417360
XP_002970239	39S ribosomal protein L45, mitochondrial	41454556	AT5G05160	Leucine-rich repeat protein kinase family protein (RUL1)	11777	AT4G33540	Metallo-beta-lactamase family protein	345264	AT4G15850	Plant DEAD box-like RNA helicase	410572
XP_003322588	40S ribosomal protein S18	99902961	AT5G16250	Thiol peptidase family protein, putative (PPPDE)	11242	AT5G25190	Integrase-type DNA-binding superfamily protein (ESE3)	309430	AT1G45130	Beta-galactosidase 5 (BGAL5)	403590
XP_005832655	Large subunit ribosomal protein L30e, cytoplasmic	41986144	D8TVF7	GTP binding protein beta 1	11113	AT5G35200	ENTH/ANTH/VHS superfamirly protein (PICALM3)	258298	AT2G25060	Early nodulin-like protein 14 (ENDOL14)	384520
XP_006413271	Pathogenesis-related protein PR-1	43041842	AT1G16630	Uncharacterized protein	11030	AT5G41350	RiING/U-box superfamily protein	230978	AT4G22666	Bifunctional inhibitor/lipid-transfer protein/seed storage 2S albumin superfamily protein (LTPG28)	359026
XP_007156345	Hypothetical protein PHAVU_003G278700g	37718167	AT3G51280	Regulator of G-protein signaling 1 (RGS1)	10971	AT5G44090	Calcium-binding EF-hand family protein	253930	AT3G48000	Aldehyde dehydrogenase 5F1 (ALDH5F1)	358358
XP_008031933	Ribosomal protein L28e	47334312	AT5G66230	Chalcone-flavanone isomerase family protein (TT5)	10831	AT5G47080	Casein kinase II beta chain 1 (CKB1)	245088	AT1G19330	Histone deacetylase complex subunit	355992
XP_009514337	Hypothetical protein PHYSODRAFT_353368	45438286	AT3G04530	Phosphoenolpyruvate carboxylase kinase 1 (PPCK1)	10625	AT5G59970	Histone superfamily protein	247534	AT2G30140	UDP-Glycosyltransferase superfamily protein (UGT87A2)	352934
XP_009529898	Hypothetical protein PHYSODRAFT_510154	45575330	AT2G42610	LIGHT-DEPENDENT SHORT HYPOCOTYLS-like protein (DUF640) (LSH10)	10618	AT5G62190	DEAD box RNA helicase (PRH75)	278634	AT5G05500	Pollen Ole e 1 allergen and extensin family protein	349622
XP_011621084	40S ribosomal protein S19-2 isoform X1	47320604	AT5G02280	SNARE-like superfamily protein	10562	AT5G63830	HIT-type Zinc finger family protein	377016	AT4G32000	Protein kinase superfamily protein (ATMRK1)	348211
XP_014274948	60S ribosomal protein L37	41882771	AT5G44040	Eisosome SEG2-like protein	10497	AT5G66960	Prolyl oligopeptidase family protein	340812	AT1G08340	Rho GTPase activating protein with PAK-box/P21-Rho-binding domain-containing protein	348130
