# Supplementary material for: Key Pathways and Genes of Arabidopsis thaliana and Arabidopsis halleri Roots under Cadmium Stress Responses: Differences and Similarities
Source: Plants (Basel). 2023 Apr 27;12(9):1793. doi: 10.3390/plants12091793 (PMC10180823; doi:10.3390/plants12091793)
Supplement: Supplementary file 1 [file plants-12-01793-s001.zip › Supplementary file S3.xlsx]

## Sheet: Tab. S3a
Table S3a: differentially expressed genes (DEGs) detected as downregulated under Cd stress responses in A. halleri root
	baseMean	log2FoldChange	lfcSE	stat	pvalue	padj
AT5G48140/AT3G07820	0.920421	-3.39779	0.897996	-3.78374	0.000154487	0.00461663
AT3G17520	15.9056	-3.22476	0.751827	-4.28924	1.79288e-05	0.000939613
XM_002872438	13.2152	-2.84269	0.850272	-3.34328	0.000827953	0.0156549
AT5G55440	1.35632	-2.79708	0.830397	-3.36837	0.000756147	0.0148329
AT1G52690	27.8802	-2.77919	0.746995	-3.7205	0.00019883	0.00551176
K4AR76	4.972	-2.65654	0.920881	-2.88478	0.00391684	0.0451422
AT5G53870	4.82282	-2.63185	0.658661	-3.99576	6.4487e-05	0.00237935
AT1G52030	13.7029	-2.60887	0.821459	-3.1759	0.00149372	0.0237149
AT5G50360	2.48096	-2.58219	0.583451	-4.42572	9.61193e-06	0.000581908
AT5G17860	1.75569	-2.48498	0.934981	-2.65778	0.00786561	0.0700114
XP_001701419	1.48138	-2.43944	0.949884	-2.56815	0.0102243	0.0814694
AT1G70130	0.859638	-2.43236	0.917857	-2.65004	0.00804825	0.0709162
XP_002881527	3.44439	-2.42898	0.748429	-3.24543	0.00117272	0.0200424
A8HMG7	1.25179	-2.42697	0.841586	-2.8838	0.00392906	0.0452425
AT2G45190	0.947992	-2.35534	0.916035	-2.57124	0.0101336	0.0811152
AT3G09110	1.56562	-2.25214	0.785898	-2.86568	0.0041611	0.0469304
AT1G42710	7.78943	-2.25018	0.844766	-2.66368	0.00772921	0.0692637
A0A061QQD3	1.12041	-2.24477	0.894864	-2.5085	0.0121245	0.0904209
AT5G23980/AT5G23990	347.37	-2.22286	0.731407	-3.03916	0.00237238	0.0321475
XM_002865387	3.84009	-2.20961	0.734009	-3.01032	0.00260969	0.0344061
AT3G16670	16.6498	-2.17258	0.624086	-3.48122	0.00049913	0.0109424
AT5G58390/AT5G58400	18.6529	-2.14579	0.679811	-3.15646	0.00159699	0.0248359
AT5G24420	10.9778	-2.11825	0.625588	-3.38601	0.000709166	0.0141216
A0A067GQS9	1.68547	-2.06451	0.639353	-3.22906	0.00124198	0.0208494
AT2G24700	36.2654	-2.04463	0.579834	-3.52624	0.000421511	0.00969476
A9NV08	1.40185	-2.04094	0.808243	-2.52516	0.0115647	0.0878544
D8TR22	13.5467	-2.0291	0.660816	-3.0706	0.00213631	0.0300855
AT5G39220	4.89823	-1.99355	0.79323	-2.5132	0.0119641	0.089605
AT3G46900	29.2784	-1.98839	0.474333	-4.19197	2.76548e-05	0.0012749
AT3G55170	4.47519	-1.96697	0.798396	-2.46366	0.0137528	0.0971956
R0HUM9	13.3861	-1.96565	0.521895	-3.76637	0.00016564	0.00484558
S4UXM8	2.90421	-1.89583	0.633182	-2.99414	0.00275223	0.0355512
AT2G47770	9.38056	-1.86781	0.556605	-3.35572	0.0007916	0.0152845
AT2G04160/AT1G20150	2.62015	-1.86681	0.660602	-2.82593	0.0047144	0.050534
AT5G24440	1.47148	-1.86351	0.659882	-2.824	0.00474277	0.0507986
UPI00053B3461	50.4741	-1.8497	0.600246	-3.08158	0.00205905	0.0295304
KVH95965	15.6919	-1.79492	0.590096	-3.04173	0.00235219	0.0319922
AT1G52000/AT3G21380	4.72154	-1.7881	0.717163	-2.4933	0.0126562	0.0928739
XM_002886175	11.6898	-1.78533	0.715942	-2.49368	0.0126425	0.0928383
AT2G37870	215.299	-1.76237	0.578002	-3.04907	0.0022955	0.0315264
AT5G25980	154.345	-1.7338	0.656178	-2.64228	0.00823503	0.0719004
AT4G29200	89.9042	-1.70434	0.669336	-2.54631	0.0108867	0.0848231
M0RSH6	3.75987	-1.69339	0.612868	-2.76306	0.00572618	0.0573653
AT4G01130	14.0468	-1.68214	0.65149	-2.58199	0.00982312	0.0801055
UPI00053ADC54	8.1707	-1.64808	0.507499	-3.24746	0.00116439	0.0199605
KDD76069	2.29849	-1.64677	0.634343	-2.59602	0.00943093	0.0782247
AT5G14380/AT3G01700	2.65303	-1.64498	0.520591	-3.15984	0.00157856	0.0245985
AT1G29920	423.331	-1.59453	0.474921	-3.35745	0.000786645	0.0152046
AT1G22630	2.65084	-1.59316	0.588549	-2.70692	0.00679097	0.0634185
XP_001765005	2.28712	-1.59194	0.630432	-2.52515	0.0115648	0.0878544
AT3G44020	4.00203	-1.59074	0.632844	-2.51364	0.0119494	0.0895907
CAI34837	3.17274	-1.5824	0.644019	-2.45708	0.0140073	0.0981298
XP_003059674	17.1534	-1.48462	0.418193	-3.55008	0.000385112	0.00908147
AT3G49970	35.3084	-1.46937	0.533529	-2.75407	0.005886	0.0581371
AT3G28270/AT3G28310	53.5425	-1.46858	0.593539	-2.47428	0.0133504	0.09593
AT3G27250	7.10397	-1.45802	0.381063	-3.82619	0.00013014	0.00404395
AT5G14740	195.389	-1.4464	0.494627	-2.92423	0.00345313	0.0413591
AT1G14760	5.1109	-1.44231	0.5008	-2.88002	0.00397652	0.0456553
AT1G03055	7.29739	-1.44011	0.523607	-2.75037	0.00595288	0.058409
AT1G35420	20.3165	-1.40405	0.417141	-3.36589	0.00076297	0.0148974
I3SJA0	15.1914	-1.401	0.383611	-3.65215	0.000260055	0.00674734
AT1G15830	9.23643	-1.40091	0.499016	-2.80734	0.00499523	0.0525672
AT1G71200	6.05581	-1.39621	0.445878	-3.13136	0.00173999	0.0261656
AT3G30340	6.00685	-1.36717	0.522759	-2.6153	0.00891485	0.0756871
AT4G39970	29.9864	-1.36284	0.444137	-3.06852	0.00215122	0.0302124
AT1G02190	6.37633	-1.36184	0.493303	-2.76066	0.00576856	0.0575788
UPI00053FBA07	5.25467	-1.36057	0.431332	-3.15434	0.0016086	0.0249375
NP_564724	25.9425	-1.36023	0.407378	-3.33899	0.000840832	0.0158104
AT1G66230	12.2849	-1.35486	0.47339	-2.86204	0.00420923	0.047159
AT2G47780	6.40603	-1.35151	0.405514	-3.33283	0.000859684	0.0159686
AT3G42800	8.97938	-1.33905	0.354877	-3.77328	0.000161113	0.00475396
AT3G02380/AT3G02390	127.054	-1.331	0.328064	-4.05713	4.96805e-05	0.00196373
AT3G48740	44.6716	-1.32117	0.393972	-3.35345	0.000798104	0.0153564
AT2G34420/AT2G34430	3125.77	-1.31932	0.435958	-3.02624	0.00247613	0.0331078
AT5G24930	129.871	-1.29977	0.422139	-3.07902	0.00207683	0.029624
A0A078DI28	7.8255	-1.2912	0.486744	-2.65272	0.00798455	0.0706102
AT5G38520	110.651	-1.28998	0.493624	-2.61329	0.00896739	0.0759039
AT2G42220	43.8533	-1.2864	0.466224	-2.7592	0.00579428	0.05761
AT5G66400/AT2G21490	277.933	-1.28629	0.321434	-4.00171	6.28854e-05	0.00234076
AT1G14430	3.03594	-1.28412	0.471542	-2.72324	0.00646451	0.0615428
AT5G06760	38.4917	-1.27276	0.416435	-3.05633	0.00224064	0.031036
AT1G64500	42.914	-1.25222	0.506417	-2.4727	0.0134097	0.0960238
AT2G47450	20.2904	-1.24085	0.455713	-2.72287	0.00647173	0.0615837
AT5G27530	43.4286	-1.23343	0.436335	-2.82679	0.00470164	0.0505078
AT3G14440	41.4393	-1.22891	0.423585	-2.90122	0.0037171	0.0435792
AT2G39310	178.47	-1.2243	0.472715	-2.58993	0.00959941	0.0790133
AT5G10100	40.697	-1.21759	0.302468	-4.02551	5.68517e-05	0.00217849
AT3G24340	7.54313	-1.21299	0.400121	-3.03157	0.00243287	0.0327912
AT1G18250	110.879	-1.20603	0.465588	-2.59034	0.00958799	0.0789989
AT3G27650	11.2682	-1.20557	0.389621	-3.09421	0.00197339	0.0286135
AT1G79780	10.0475	-1.19711	0.331415	-3.61211	0.000303714	0.00756341
AT1G64620	6.0167	-1.19555	0.374086	-3.19592	0.00139387	0.0226608
AT5G52900	8.00301	-1.19204	0.413076	-2.88577	0.00390454	0.0450909
AT1G66830	14.4658	-1.17286	0.461887	-2.53929	0.0111079	0.0857536
AT2G26330	88.6853	-1.16696	0.349662	-3.3374	0.000845665	0.0158104
AT3G55580	42.339	-1.16625	0.401625	-2.90382	0.0036864	0.0433157
AT5G54270	545.369	-1.1645	0.466374	-2.49691	0.012528	0.0924055
AT1G62500	1183.2	-1.12998	0.372559	-3.03301	0.00242126	0.0326647
EFN51624	40.6118	-1.11892	0.369242	-3.03032	0.00244298	0.0328352
AT4G37760	54.4839	-1.11806	0.454711	-2.45883	0.013939	0.0978561
AT4G15248	43.3154	-1.11707	0.364413	-3.06539	0.00217387	0.0303707
AT5G19470	29.0491	-1.11674	0.411884	-2.71131	0.00670182	0.0628797
AT3G56940	160.198	-1.11158	0.394098	-2.82056	0.00479402	0.0512172
XP_002868019	28.5544	-1.10663	0.394315	-2.80646	0.00500899	0.0526856
AT1G18650	41.382	-1.10585	0.368348	-3.0022	0.0026804	0.0350097
AT5G53370	518.222	-1.09702	0.414724	-2.64519	0.00816451	0.0714327
AT3G17040	37.801	-1.09631	0.384108	-2.85418	0.00431476	0.0477936
AT1G12790	6.26126	-1.09532	0.400135	-2.73736	0.00619336	0.0599484
AT5G19110	171.221	-1.09183	0.396115	-2.75634	0.00584523	0.0578972
AT2G46380	30.9629	-1.0851	0.343315	-3.16064	0.0015742	0.0245851
AT2G41370	89.0821	-1.0802	0.388356	-2.78147	0.00541139	0.0553212
AT1G74470/AT1G18790	477.855	-1.07639	0.380033	-2.83236	0.00462054	0.0498697
AT4G17920	11.8434	-1.07162	0.352136	-3.04319	0.00234087	0.0318715
KYR02504	100.75	-1.07157	0.361468	-2.96451	0.00303166	0.0379694
AT4G27440	143.938	-1.06897	0.410935	-2.60131	0.00928688	0.0774875
AT5G52890	8.03561	-1.06826	0.335727	-3.18194	0.00146294	0.0234026
NP_001078294	10.0603	-1.05826	0.42646	-2.48151	0.0130828	0.0948808
AT1G64670	10.0217	-1.0557	0.348391	-3.03022	0.00244378	0.0328352
AT1G68590	19.9235	-1.05052	0.407972	-2.57498	0.0100245	0.0806852
AT1G07390	58.4777	-1.02943	0.404057	-2.54774	0.0108423	0.0845443
AT3G20820	65.1263	-1.02741	0.330805	-3.1058	0.00189762	0.0277671
AT1G26760	18.9996	-1.01779	0.377004	-2.69968	0.00694066	0.064305
AT1G74070	14.3382	-1.0159	0.406371	-2.49993	0.0124219	0.0917296
AT5G08050	17.0305	-1.0133	0.411528	-2.46229	0.0138052	0.0973387
AT3G47470	327.881	-1.0089	0.410308	-2.45889	0.0139369	0.0978561
AT5G01530	487.631	-0.995963	0.393363	-2.53192	0.0113441	0.0869395
XP_002870974	42.6654	-0.995541	0.376911	-2.64131	0.00825855	0.071969
XP_004969693	30.1579	-0.989645	0.403556	-2.45231	0.0141942	0.0988898
AT1G14687	8.22497	-0.988709	0.366964	-2.69429	0.00705379	0.0649567
AT3G48350	21.347	-0.987048	0.331684	-2.97587	0.00292159	0.0369238
AT3G12970	5.32194	-0.983189	0.383293	-2.56511	0.0103143	0.0820464
AT5G17230	107.311	-0.983121	0.321731	-3.05572	0.00224518	0.0310785
AT4G24790	49.1711	-0.982368	0.354873	-2.76823	0.00563622	0.0567881
AT1G10980	62.3958	-0.981373	0.285227	-3.44068	0.000580265	0.0122006
AT3G15540/AT1G52830	56.7282	-0.981218	0.30056	-3.26464	0.00109605	0.0191472
AT4G11950	11.1274	-0.98108	0.253384	-3.87191	0.000107986	0.00353341
AT3G19480	14.9803	-0.979941	0.397168	-2.46732	0.0136129	0.0966056
AT2G37660	68.508	-0.971995	0.386302	-2.51616	0.0118643	0.089338
AT1G74090	166.83	-0.971141	0.365813	-2.65475	0.00793683	0.0703355
AT3G08770	323.95	-0.970977	0.268698	-3.61363	0.000301937	0.00754592
AT2G47180	439.691	-0.96939	0.363562	-2.66637	0.00766748	0.0688863
AT5G19850	9.7667	-0.969267	0.376474	-2.57459	0.0100358	0.0806852
AT1G07010	61.6025	-0.964867	0.383828	-2.5138	0.0119439	0.0895813
AT3G49760	5.51221	-0.96303	0.319307	-3.016	0.00256135	0.0339174
AT4G25100	749.483	-0.959003	0.29933	-3.20383	0.00135613	0.0222342
AT1G19970	11.2079	-0.957285	0.366222	-2.61394	0.00895035	0.0758207
AT1G27480	9.84716	-0.956257	0.357195	-2.67713	0.00742562	0.0673465
AT3G13175	55.9211	-0.951513	0.323411	-2.94212	0.00325978	0.0398359
AT4G28740	30.248	-0.951292	0.306315	-3.10561	0.00189889	0.0277671
AT1G74730	18.7323	-0.951288	0.358621	-2.65263	0.00798672	0.0706102
AT3G24520	170.098	-0.949679	0.294262	-3.22733	0.00124952	0.0209094
AT1G14700	491.777	-0.944107	0.323995	-2.91396	0.0035688	0.0422877
AT4G28940	731.7	-0.942623	0.363899	-2.59034	0.00958801	0.0789989
AT1G07430/AT2G29380	17.1116	-0.932993	0.309795	-3.01164	0.00259837	0.0342991
NP_191784	54.0757	-0.928974	0.379212	-2.44975	0.0142957	0.099367
AT5G44190	60.7636	-0.923383	0.249236	-3.70486	0.000211509	0.00575719
AT3G47650	34.5342	-0.922642	0.313023	-2.94752	0.00320332	0.0394434
AT1G71480	20.5837	-0.922048	0.331005	-2.7856	0.00534282	0.0549628
AT4G28660	21.2386	-0.921795	0.373629	-2.46714	0.0136197	0.0966056
AT1G64430	53.7169	-0.919749	0.273239	-3.36609	0.000762406	0.0148974
AT1G51110	45.6171	-0.917911	0.321822	-2.85223	0.00434134	0.047937
AT3G57670	18.7882	-0.91306	0.289829	-3.15034	0.00163078	0.0251702
AT4G25290	34.0745	-0.912883	0.371856	-2.45494	0.0140909	0.09838
AT5G59520	164.447	-0.912818	0.328051	-2.78255	0.00539336	0.0552125
AT1G07440	120.175	-0.907973	0.294022	-3.08811	0.00201431	0.0290867
AT1G69260	6.65954	-0.907659	0.348139	-2.60718	0.00912924	0.0767634
AT5G58680	10.7453	-0.903658	0.281187	-3.21372	0.00131028	0.0216679
AT2G02100/AT2G02140	616.678	-0.901103	0.297257	-3.03139	0.00243428	0.0327912
AT4G25080	79.2755	-0.900536	0.235182	-3.8291	0.000128613	0.00402019
AT5G16030	29.4365	-0.889807	0.318306	-2.79544	0.00518285	0.0538689
AT2G31920	10.1892	-0.889254	0.358299	-2.48188	0.0130692	0.0948808
AT3G63450	20.4542	-0.888892	0.322331	-2.7577	0.00582097	0.0577111
AT5G66230	103.526	-0.887923	0.339542	-2.61506	0.00892114	0.0756871
AT4G15110	703.971	-0.882725	0.277255	-3.1838	0.00145354	0.0233765
AT5G42100	478.096	-0.878225	0.305928	-2.87069	0.00409575	0.0465416
AT2G33400	52.5622	-0.877667	0.301332	-2.91262	0.00358408	0.0423972
AT5G01920	84.9091	-0.877353	0.324927	-2.70015	0.00693076	0.0642681
AT2G30520	231.516	-0.875301	0.318859	-2.74511	0.00604908	0.0589736
AT5G23730	36.1807	-0.872784	0.233659	-3.73529	0.0001875	0.00529131
AT3G14810	221.931	-0.86946	0.320752	-2.71069	0.0067143	0.0629256
AT3G16520	76.2069	-0.869239	0.327787	-2.65184	0.00800536	0.0707157
AT1G49405	10.875	-0.86873	0.265216	-3.27556	0.00105454	0.0185917
AT2G33860	413.005	-0.866525	0.246888	-3.5098	0.000448451	0.0101386
AT5G66570/AT3G50820	877.733	-0.862746	0.329855	-2.61553	0.00890899	0.0756833
AT5G58480	73.5713	-0.861379	0.305836	-2.81648	0.00485533	0.0516419
AT5G01170	84.5731	-0.861009	0.263057	-3.27309	0.00106378	0.0187208
AT2G21590	9.12689	-0.850944	0.268967	-3.16375	0.00155749	0.0244107
AT5G15240	18.0569	-0.848372	0.231252	-3.66861	0.000243874	0.00645104
AT1G67590	64.3894	-0.847181	0.2529	-3.34986	0.000808513	0.0154531
AT3G61890	225.34	-0.840287	0.283018	-2.96902	0.00298754	0.0375625
AT1G16330	49.2934	-0.838305	0.324409	-2.5841	0.00976343	0.079789
AT1G20520	12.8098	-0.831059	0.266526	-3.11811	0.00182015	0.0270147
AT1G25510	151.744	-0.827518	0.30054	-2.75344	0.0058973	0.0581941
AT2G22460	19.5713	-0.826158	0.282002	-2.92961	0.00339383	0.0408812
AT5G13840	1177.75	-0.823046	0.259508	-3.17156	0.00151622	0.0239817
AT2G41820	332.757	-0.822462	0.314711	-2.61338	0.00896505	0.0759039
AT5G14200/AT1G31180	547.509	-0.820952	0.315269	-2.60397	0.00921502	0.0771081
AT2G22980	308.107	-0.820791	0.324279	-2.53112	0.0113697	0.0870942
AT1G09812	30.2632	-0.817922	0.289175	-2.82846	0.00467719	0.0503521
AT5G65590	13.9725	-0.811613	0.327839	-2.47565	0.0132995	0.0956064
AT1G24130	26.3816	-0.811464	0.234152	-3.46554	0.000529167	0.0114276
AT1G53520	17.3851	-0.810187	0.314024	-2.58002	0.00987949	0.0801821
AT4G02360	70.3076	-0.80584	0.301594	-2.67194	0.00754143	0.0680465
AT5G58330	79.171	-0.802991	0.319903	-2.51011	0.0120694	0.0901396
AT5G04360	47.1127	-0.801211	0.289724	-2.76543	0.00568472	0.0570585
AT4G30993	83.1062	-0.796742	0.308936	-2.57898	0.00990912	0.0802635
AT1G78170	22.2952	-0.795629	0.312223	-2.54828	0.0108257	0.0844723
AT5G63530/AT3G02960	211.721	-0.795084	0.294981	-2.69537	0.00703095	0.0648831
AT1G68400	662.397	-0.793796	0.321307	-2.47052	0.0134916	0.096217
AT3G53380	79.797	-0.792348	0.288727	-2.74428	0.00606433	0.059036
AT2G24030	25.4256	-0.791322	0.292375	-2.70653	0.00679898	0.0634652
AT5G50160	59.4236	-0.790721	0.304104	-2.60017	0.00931788	0.0776232
AT1G68470	290.638	-0.786598	0.308064	-2.55336	0.0106689	0.0837766
AT4G29260	515.136	-0.785104	0.298625	-2.62906	0.00856202	0.0735363
AT5G23820/AT5G23840	365.059	-0.782997	0.256319	-3.05478	0.00225229	0.031136
AT2G46210	7.53533	-0.781407	0.306256	-2.55149	0.0107265	0.0840507
AT1G75640	52.211	-0.781284	0.303498	-2.57426	0.0100455	0.0806852
AT5G16200	43.7448	-0.780931	0.217176	-3.59585	0.000323335	0.00797267
AT2G01320	123.645	-0.770846	0.223496	-3.44903	0.000562598	0.0119377
AT2G05620	51.5098	-0.769594	0.30546	-2.51946	0.0117536	0.0887491
AT5G18380	13.828	-0.769409	0.279452	-2.75328	0.0059001	0.0581945
AT1G73330	4898.92	-0.768558	0.258895	-2.96861	0.0029915	0.0375625
AT4G24710	32.8884	-0.766257	0.304729	-2.51455	0.0119185	0.0894861
AT5G15410	61.9366	-0.766212	0.308985	-2.47977	0.0131467	0.0952223
AT3G59940	14.2631	-0.761439	0.260815	-2.91946	0.00350638	0.0417954
AT1G17100	51.1944	-0.760574	0.278712	-2.72889	0.00635478	0.0609403
AT4G11140	27.8508	-0.759598	0.247692	-3.06671	0.00216429	0.0302944
AT1G26330	26.5224	-0.757157	0.275895	-2.74437	0.0060627	0.059036
AT4G29020	111.324	-0.756736	0.261394	-2.895	0.00379162	0.044158
AT3G10840	39.6135	-0.756381	0.218734	-3.45799	0.000544213	0.0116047
AT3G18080/AT3G18070	485.971	-0.753441	0.250439	-3.00848	0.00262559	0.0345725
AT3G16770	3457.31	-0.750583	0.213429	-3.51677	0.000436828	0.00997084
AT3G42670	140.194	-0.747482	0.259619	-2.87915	0.00398749	0.0456783
AT2G47930	47.2907	-0.746663	0.265104	-2.81649	0.00485511	0.0516419
AT5G66330	35.8788	-0.746369	0.289795	-2.5755	0.0100094	0.0806852
AT5G50100	28.1728	-0.744475	0.291376	-2.55503	0.0106178	0.0835594
AT2G02170	91.3668	-0.741671	0.264595	-2.80304	0.00506235	0.0530615
UPI0005396AC2	20.541	-0.740841	0.244826	-3.02599	0.00247821	0.0331078
AT3G11520	68.1522	-0.740381	0.296581	-2.49638	0.0125467	0.0924768
AT5G19730	128.173	-0.739361	0.270324	-2.73509	0.00623626	0.0602134
AT3G44560	50.8654	-0.739194	0.294474	-2.51022	0.0120657	0.0901396
AT3G02850	521.149	-0.738808	0.286178	-2.58163	0.00983337	0.0801055
AT1G30840	438.96	-0.738712	0.295319	-2.5014	0.0123704	0.0915269
AT1G03630	106.749	-0.735684	0.284995	-2.5814	0.00984019	0.0801055
AT2G47910	56.9924	-0.733475	0.249218	-2.9431	0.00324945	0.0397788
AT3G61220	55.718	-0.733336	0.296069	-2.47691	0.0132525	0.0955228
AT5G51750	39.806	-0.732387	0.284027	-2.57858	0.00992066	0.0803261
AT3G07990	80.1227	-0.732028	0.28717	-2.54911	0.0107998	0.0843643
AT5G64570/AT5G09700	367.789	-0.731577	0.292154	-2.50408	0.0122771	0.0911597
AT2G36990	51.8553	-0.730533	0.287146	-2.54412	0.0109553	0.0850742
AT5G35170	158.069	-0.730379	0.267984	-2.72545	0.0064213	0.0613532
AT3G50440	37.4678	-0.730087	0.219489	-3.32631	0.000880041	0.0162638
AT2G42840	283.53	-0.728753	0.260754	-2.79479	0.0051933	0.0539509
AT1G19950	122.623	-0.725988	0.295608	-2.45592	0.0140526	0.0982288
AT3G14310	1375.6	-0.723093	0.255397	-2.83125	0.00463667	0.0500182
AT2G35310	31.2149	-0.722919	0.249164	-2.90138	0.00371521	0.0435792
AT3G29280	659.423	-0.720808	0.276455	-2.60733	0.00912519	0.0767634
AT4G13550	94.5699	-0.715692	0.209081	-3.42304	0.000619249	0.0127406
AT3G29030	254.791	-0.714687	0.158616	-4.50578	6.61295e-06	0.000437137
AT5G60120	280.989	-0.714211	0.264009	-2.70525	0.00682525	0.0636258
AT5G24120	82.2462	-0.71298	0.230747	-3.08988	0.00200234	0.0289535
AT2G43900	169.234	-0.70864	0.215808	-3.28366	0.00102467	0.0182625
AT4G04350	65.8851	-0.706124	0.245127	-2.88065	0.0039686	0.045614
AT2G40480	623.521	-0.705866	0.273667	-2.57929	0.00990047	0.0802551
AT1G72670	65.4403	-0.703863	0.256962	-2.73918	0.00615934	0.059717
AT2G33770	10383.9	-0.695258	0.194439	-3.57571	0.000349273	0.00841594
Q9M297	27.6269	-0.694956	0.242657	-2.86395	0.00418398	0.0470756
AT2G05790	679.068	-0.69404	0.208879	-3.32269	0.000891526	0.0164616
AT1G47670	355.76	-0.693787	0.227847	-3.04497	0.00232703	0.0318483
AT4G30950	128.934	-0.693002	0.185947	-3.72687	0.000193869	0.00542949
AT3G63410	313.454	-0.692093	0.228797	-3.02493	0.00248694	0.0332034
AT2G47400	361.744	-0.690794	0.19234	-3.59153	0.00032874	0.00807214
AT3G50700	57.9378	-0.687355	0.22617	-3.03911	0.00237276	0.0321475
AT1G79760	166.409	-0.686642	0.207099	-3.31552	0.00091472	0.0167869
AT1G57590/AT1G09550	20.8407	-0.684955	0.26168	-2.61753	0.00885684	0.0753203
AT2G25270	117.749	-0.683361	0.258967	-2.6388	0.00831999	0.0722529
AT1G21880	175.782	-0.682529	0.268648	-2.54061	0.011066	0.0855239
AT2G01210	57.993	-0.682494	0.272478	-2.50476	0.0122533	0.0910915
AT4G03210	214.265	-0.680648	0.243297	-2.7976	0.00514835	0.0536692
AT2G28900	212.637	-0.680079	0.256826	-2.64801	0.0080967	0.0712537
AT3G06145	60.1139	-0.679303	0.215598	-3.15079	0.0016283	0.0251503
AT2G02020	34.0844	-0.678726	0.265098	-2.56029	0.0104585	0.082866
AT1G68430	21.408	-0.675492	0.275279	-2.45385	0.0141338	0.0985668
AT4G18810	89.0612	-0.673613	0.191627	-3.51523	0.00043938	0.0099795
AT2G21280	45.1482	-0.67103	0.26995	-2.48576	0.0129275	0.0941757
AT5G51560	107.859	-0.665834	0.257516	-2.5856	0.009721	0.0795348
AT5G58140	170.082	-0.66554	0.268242	-2.48112	0.0130971	0.0949518
AT1G56670	44.8976	-0.663308	0.260003	-2.55115	0.0107367	0.0840507
AT3G08040	1131.08	-0.662497	0.227596	-2.91084	0.00360453	0.0425435
AT5G43780	1325.14	-0.660926	0.205431	-3.21727	0.00129419	0.0214862
AT5G52420	27.0461	-0.660904	0.259979	-2.54214	0.0110176	0.0853131
AT4G36000	65.2645	-0.660269	0.209864	-3.14618	0.00165418	0.0253309
AT3G52180	174.349	-0.659449	0.197214	-3.34382	0.000826331	0.0156549
AT1G60160	39.364	-0.658297	0.231003	-2.84974	0.00437553	0.048188
AT1G27660	39.0545	-0.657155	0.23894	-2.75029	0.00595422	0.058409
AT1G71720	38.3214	-0.655445	0.223611	-2.93119	0.00337668	0.0407212
AT3G10690	538.467	-0.654196	0.194798	-3.35833	0.000784136	0.0152046
AT2G45340	140.021	-0.65417	0.223359	-2.92879	0.00340288	0.0409278
AT2G13610	39.3085	-0.64763	0.217062	-2.98361	0.0028487	0.0363486
AT3G25980	132.311	-0.64521	0.25927	-2.48857	0.0128259	0.0937276
AT3G18050	69.5111	-0.644196	0.257267	-2.504	0.0122798	0.0911597
AT1G13250	115.317	-0.642358	0.25038	-2.56553	0.0103018	0.0819938
AT1G64080	37.3029	-0.640351	0.219407	-2.91855	0.00351661	0.0418103
AT2G28550	513.395	-0.640303	0.249055	-2.57093	0.0101425	0.0811247
AT5G06940	68.5232	-0.63892	0.231302	-2.76228	0.0057399	0.0574481
AT5G27330	363.919	-0.638238	0.231671	-2.75493	0.0058704	0.0580373
AT3G14240	229.516	-0.636579	0.253312	-2.51302	0.0119701	0.0896186
AT3G21250	186.298	-0.63332	0.221352	-2.86114	0.0042212	0.0471829
AT4G34000	778.795	-0.631872	0.163226	-3.87114	0.000108326	0.00353547
AT5G54880	19.5511	-0.630436	0.24949	-2.5269	0.0115076	0.0876278
AT1G27680	171.231	-0.628126	0.238797	-2.63038	0.00852892	0.0733872
AT3G45780	127.15	-0.62775	0.240086	-2.61469	0.00893076	0.0756871
AT2G02500	55.4918	-0.626709	0.234098	-2.67712	0.00742576	0.0673465
AT4G37890	50.4594	-0.625399	0.192103	-3.25554	0.00113178	0.0195606
AT1G73590	296.221	-0.623446	0.213909	-2.91454	0.00356218	0.042233
AT1G08520	125.377	-0.622196	0.238472	-2.60909	0.00907828	0.0765351
AT3G61310	64.6618	-0.618637	0.24847	-2.48978	0.0127821	0.0935047
AT3G10700	96.4955	-0.617451	0.196468	-3.14276	0.00167362	0.0254857
AT3G10525	50.3655	-0.616412	0.190397	-3.23751	0.00120579	0.0203854
AT3G50280	55.0865	-0.615297	0.245128	-2.5101	0.0120697	0.0901396
AT2G33250	79.3655	-0.615042	0.177857	-3.45806	0.000544082	0.0116047
AT3G15620	39.6854	-0.614929	0.246576	-2.49387	0.0126359	0.0928383
AT3G17670	17.42	-0.614272	0.203624	-3.01669	0.00255549	0.0338611
AT5G65710	188.76	-0.611646	0.237786	-2.57226	0.0101038	0.0809998
AT1G34390	150.944	-0.610177	0.195469	-3.1216	0.00179871	0.0268
AT1G78370	1136.16	-0.609529	0.21076	-2.89205	0.00382739	0.0443783
AT2G35150	56.9598	-0.60951	0.187378	-3.25285	0.00114256	0.0196823
AT3G15354	331.322	-0.609372	0.245548	-2.48168	0.0130766	0.0948808
D7L9B9	365.313	-0.608484	0.223806	-2.7188	0.00655193	0.0620921
AT5G13690	155.439	-0.60833	0.203258	-2.99289	0.00276349	0.0356153
AT2G40280	80.4697	-0.608214	0.230775	-2.63552	0.00840079	0.0726849
AT1G13670	146.054	-0.608174	0.247524	-2.45703	0.0140092	0.0981298
AT2G38195	15.4253	-0.605821	0.237985	-2.54562	0.0109083	0.0849255
AT1G11720	293.757	-0.605107	0.184918	-3.27229	0.00106679	0.0187449
AT3G29320	196.209	-0.604258	0.203944	-2.96286	0.00304796	0.0380643
AT3G49670	929.511	-0.603512	0.23988	-2.51589	0.0118733	0.089338
AT5G57070	231.764	-0.602431	0.244796	-2.46095	0.013857	0.0974753
AT5G12940	147.877	-0.601931	0.245937	-2.4475	0.0143852	0.099784
AT3G17840	75.8617	-0.601161	0.235828	-2.54915	0.0107985	0.0843643
AT2G15440	60.0568	-0.601126	0.228599	-2.62961	0.00854833	0.0734487
AT5G58250	98.1457	-0.599371	0.142731	-4.19932	2.6772e-05	0.00124981
AT1G45230	35.3972	-0.599264	0.217101	-2.7603	0.00577475	0.0575788
AT5G08750	96.6373	-0.598271	0.190004	-3.14873	0.00163979	0.025218
AT5G08720	71.6861	-0.596577	0.15799	-3.77604	0.000159343	0.00472823
AT3G17120	132.611	-0.595916	0.139339	-4.27674	1.89647e-05	0.000973469
AT1G47128	2418.12	-0.595395	0.225937	-2.63522	0.00840822	0.0726921
AT1G09390	63.731	-0.59535	0.22965	-2.59242	0.00953031	0.0786327
AT1G67700	148.182	-0.592572	0.188579	-3.1423	0.00167624	0.0254884
AT4G21960	25210.3	-0.588459	0.199733	-2.94623	0.00321676	0.0395645
AT5G11550	97.6102	-0.588172	0.213851	-2.75037	0.00595272	0.058409
AT5G02030	42.3789	-0.587815	0.237397	-2.47608	0.0132833	0.0955782
AT3G11210	87.4586	-0.587073	0.215988	-2.71808	0.00656619	0.0621179
AT2G36400	54.0802	-0.586726	0.184352	-3.18265	0.00145936	0.0233983
AT5G14660	22.7768	-0.586657	0.219071	-2.67793	0.00740789	0.0673003
AT5G01260	73.2473	-0.585818	0.198627	-2.94934	0.00318456	0.0392812
AT1G01310	148.247	-0.585635	0.195065	-3.00226	0.00267982	0.0350097
AT5G53890	350.145	-0.585601	0.213399	-2.74416	0.00606669	0.059036
AT1G63020	111.949	-0.585601	0.215831	-2.71324	0.0066629	0.0626287
AT1G68540	46.1323	-0.585199	0.230515	-2.53866	0.0111277	0.0858435
AT1G23700	36.4494	-0.584399	0.223037	-2.62019	0.00878814	0.0749589
AT1G28390	236.676	-0.581519	0.182978	-3.17808	0.00148254	0.0235729
AT1G11600	93.5181	-0.58108	0.167939	-3.46006	0.000540047	0.0115627
AT1G76310	256.838	-0.580019	0.212038	-2.73545	0.00622955	0.0601976
AT1G27950	225.724	-0.578721	0.216575	-2.67214	0.00753682	0.0680465
AT3G07410	214.854	-0.575314	0.204906	-2.8077	0.00498961	0.0525669
AT3G02030	82.3448	-0.575032	0.232897	-2.46904	0.0135475	0.0964581
AT1G07090	48.9891	-0.574249	0.216082	-2.65755	0.00787109	0.070024
AT2G23380	173.425	-0.573576	0.218283	-2.62767	0.00859713	0.0737177
AT1G70370	1105.79	-0.572661	0.192852	-2.96943	0.00298351	0.0375487
AT2G20240	37.4159	-0.572129	0.183765	-3.11338	0.00184958	0.0273404
AT1G26220	76.4971	-0.571708	0.23222	-2.46192	0.0138194	0.0973878
AT1G11840	5044.91	-0.570343	0.198113	-2.87887	0.00399101	0.0456783
AT5G11260/AT3G17609	334.289	-0.569968	0.22914	-2.48742	0.0128673	0.0939023
AT1G15870	14.4252	-0.569698	0.22413	-2.54182	0.0110276	0.0853526
AT5G64080	317.469	-0.569037	0.209405	-2.7174	0.00657976	0.0621904
AT1G51940	75.0499	-0.568992	0.23207	-2.45181	0.014214	0.0989297
AT2G30900	129.412	-0.566533	0.196357	-2.88522	0.00391142	0.0451044
AT3G18850	41.5198	-0.565871	0.228844	-2.47274	0.0134081	0.0960238
AT1G73885	104.244	-0.563185	0.189012	-2.97963	0.00288596	0.0366274
AT5G48600/AT3G28925	453.362	-0.562575	0.207509	-2.71108	0.00670641	0.0628797
AT5G23310	55.9039	-0.562406	0.20384	-2.75906	0.0057968	0.05761
AT3G02930	30.7253	-0.561705	0.211344	-2.65778	0.00786581	0.0700114
AT1G05190	166.622	-0.559744	0.190156	-2.94361	0.00324409	0.0397363
AT1G69295	712.567	-0.559392	0.200911	-2.78428	0.00536461	0.0550312
AT4G39800	228.271	-0.559111	0.214489	-2.60671	0.00914179	0.0767634
AT1G15000	92.046	-0.555492	0.149348	-3.71944	0.000199663	0.00552035
AT5G01890	364.767	-0.554219	0.219207	-2.52829	0.0114618	0.0873337
AT3G23830	344.752	-0.553712	0.218514	-2.53399	0.0112772	0.0866795
AT1G65920	103.954	-0.546529	0.213916	-2.55488	0.0106226	0.0835594
AT5G24030	429.507	-0.545101	0.16874	-3.23042	0.00123608	0.0207669
AT5G66350	40.6867	-0.544317	0.148879	-3.6561	0.000256083	0.00667427
AT5G62920	384.956	-0.544294	0.215871	-2.52139	0.0116892	0.0884904
AT1G30490	1064.34	-0.543742	0.166846	-3.25894	0.00111829	0.0194071
AT5G14450	131.026	-0.543214	0.176101	-3.08467	0.00203776	0.0293248
AT3G14220	345.301	-0.543119	0.206101	-2.63521	0.00840852	0.0726921
AT3G62110	200.877	-0.542715	0.204331	-2.65606	0.00790588	0.0701605
AT1G18840	247.106	-0.542089	0.205239	-2.64125	0.00825997	0.071969
AT1G10417	105.833	-0.541974	0.186965	-2.8988	0.00374594	0.0437848
AT1G01740	33.5634	-0.541723	0.209259	-2.58877	0.00963184	0.0790798
AT1G16720	278.618	-0.541379	0.132517	-4.08535	4.40104e-05	0.00180391
AT1G53800	57.0775	-0.541247	0.212278	-2.54971	0.0107812	0.0843125
AT2G18500	115.129	-0.539429	0.178204	-3.02703	0.00246968	0.0330777
AT4G23740	218.581	-0.537575	0.198726	-2.7051	0.00682829	0.063626
AT5G13510	94.6782	-0.53752	0.177545	-3.02751	0.0024658	0.0330467
AT5G16290	202.828	-0.536152	0.19456	-2.75572	0.00585626	0.0579792
AT3G06510	359.141	-0.534267	0.151466	-3.52731	0.0004198	0.00967275
AT5G13910/AT1G28160	40.724	-0.533998	0.193089	-2.76555	0.00568262	0.0570585
AT3G22540	55.8353	-0.533565	0.211012	-2.5286	0.0114518	0.0872892
AT5G63700	81.3528	-0.533153	0.196347	-2.71536	0.00662031	0.0624337
AT3G25690	215.474	-0.532317	0.190412	-2.7956	0.00518035	0.0538689
AT3G25500	980.819	-0.530818	0.204959	-2.58988	0.009601	0.0790133
AT4G17600	244.684	-0.528848	0.149402	-3.53978	0.000400466	0.00936405
AT3G51480	225.101	-0.527345	0.173497	-3.03951	0.00236966	0.0321475
AT3G49220	191.452	-0.526618	0.147077	-3.58057	0.000342846	0.00831048
AT5G11780	36.1071	-0.52641	0.175704	-2.99601	0.0027354	0.0354206
AT1G42540	212.097	-0.525523	0.17364	-3.02651	0.00247393	0.0331078
AT5G57960	51.2061	-0.523983	0.166732	-3.14266	0.00167421	0.0254857
AT5G24380	136.691	-0.522781	0.204594	-2.55521	0.0106123	0.0835594
AT3G01060	324.748	-0.522647	0.179049	-2.91902	0.00351138	0.0417954
AT1G24256	22.1726	-0.521739	0.209962	-2.48492	0.0129579	0.0943647
AT5G62960	72.631	-0.521691	0.193912	-2.69035	0.00713779	0.0654675
AT3G03300	1150.02	-0.520726	0.190003	-2.74061	0.00613249	0.0595217
AT5G19040	481.057	-0.517805	0.15726	-3.29267	0.00099242	0.0178551
AT2G45360	154.422	-0.514384	0.201022	-2.55884	0.0105021	0.0829612
AT5G23940	81.9848	-0.512898	0.171243	-2.99514	0.00274319	0.0354562
AT5G22640	259.415	-0.506327	0.178376	-2.83853	0.00453218	0.0491425
AT4G26510	77.2845	-0.506313	0.186921	-2.7087	0.00675475	0.0632472
AT5G55220	81.4763	-0.505979	0.197926	-2.55641	0.0105759	0.0833571
AT3G55760	148.731	-0.505132	0.203413	-2.48328	0.013018	0.094737
AT2G29650	112.217	-0.505039	0.200887	-2.51405	0.0119353	0.0895719
AT1G34110	183.523	-0.504921	0.178617	-2.82683	0.00470112	0.0505078
AT3G23410	77.8348	-0.504395	0.174068	-2.89769	0.00375917	0.0438317
AT1G47270	61.8525	-0.503513	0.185583	-2.71315	0.00666477	0.0626287
AT1G50490	497.721	-0.503379	0.202842	-2.48162	0.0130785	0.0948808
AT1G79820	245.851	-0.503101	0.185032	-2.719	0.00654793	0.0620845
AT5G49190	43.9735	-0.503018	0.17519	-2.87127	0.00408823	0.046482
AT4G31850	36.0178	-0.502678	0.182265	-2.75795	0.00581649	0.0576939
AT1G78630	125.949	-0.502464	0.177378	-2.83273	0.00461517	0.0498628
AT4G35620	64.1757	-0.502112	0.161513	-3.1088	0.00187849	0.0276562
AT2G19170	1066.84	-0.5008	0.203897	-2.45614	0.014044	0.0982288
AT1G69700	390.661	-0.498557	0.171572	-2.90582	0.00366296	0.0430643
AT5G58500	56.6122	-0.497786	0.161431	-3.08359	0.00204522	0.029372
AT5G61340	976.368	-0.497442	0.190553	-2.61051	0.00904063	0.0763093
AT2G22900	260.03	-0.496404	0.163097	-3.04361	0.00233757	0.0318715
AT5G51350	190.17	-0.49478	0.195362	-2.53263	0.0113209	0.0868886
AT1G80260	245.397	-0.494757	0.177079	-2.79399	0.00520628	0.0540331
AT4G15430	352.495	-0.494261	0.182971	-2.7013	0.00690688	0.0641314
AT5G01240	49.0905	-0.493958	0.15352	-3.21755	0.00129288	0.0214814
AT1G04010	102.605	-0.493796	0.198581	-2.48662	0.0128964	0.0940795
AT1G32900	349.024	-0.493554	0.165015	-2.99096	0.00278098	0.0357691
AT5G14370	102.643	-0.492382	0.175304	-2.80874	0.00497355	0.0524685
AT2G41480	934.897	-0.488653	0.197703	-2.47166	0.0134487	0.0960468
AT3G05810	80.2582	-0.488275	0.192377	-2.53811	0.0111452	0.0859156
AT3G54750	218.136	-0.487542	0.175855	-2.77241	0.00556429	0.0564239
AT3G06730	50.2992	-0.487363	0.167383	-2.91166	0.00359514	0.0424804
AT1G70940	953.875	-0.48674	0.188644	-2.58021	0.00987407	0.0801821
AT5G65470	295.794	-0.485134	0.182605	-2.65674	0.00789014	0.0701323
AT4G10450	82.8156	-0.483034	0.186219	-2.5939	0.00948942	0.0785466
AT4G31730	635.61	-0.482437	0.150014	-3.21595	0.00130012	0.0215676
AT3G28860	1212.79	-0.482254	0.143131	-3.36931	0.000753556	0.0148096
AT5G20950/AT3G62710	1320.94	-0.481509	0.188665	-2.55219	0.0107047	0.0839323
AT1G77060	24.5135	-0.480418	0.195684	-2.45508	0.0140855	0.09838
AT1G23080	119.978	-0.4804	0.18779	-2.55818	0.0105222	0.0830271
AT5G15940	150.994	-0.478434	0.178754	-2.67649	0.00743979	0.0674447
AT2G34460	323.799	-0.478388	0.0905077	-5.2856	1.25293e-07	2.16367e-05
AT4G31890	149.978	-0.476925	0.179532	-2.65648	0.00789604	0.0701323
AT5G44650	46.3427	-0.476221	0.192779	-2.4703	0.0135	0.096217
AT5G23220	521.652	-0.475241	0.169922	-2.79681	0.00516093	0.0537206
AT4G34240	82.9819	-0.475107	0.166115	-2.86011	0.00423494	0.0472323
AT3G18390	168.815	-0.474534	0.17761	-2.67178	0.00754493	0.0680465
AT3G58790/AT3G58780	291.489	-0.472519	0.150285	-3.14416	0.00166567	0.0254108
AT3G63490	177.715	-0.472141	0.14062	-3.35757	0.00078631	0.0152046
AT1G26650	93.312	-0.470431	0.190613	-2.46799	0.0135875	0.096581
AT1G63850	215.181	-0.470294	0.13308	-3.53391	0.000409453	0.00952138
AT2G33640	107.72	-0.468925	0.151514	-3.09494	0.00196854	0.0285629
AT1G24625	182.972	-0.465762	0.185855	-2.50605	0.012209	0.0908581
AT5G60890	282.414	-0.465476	0.18838	-2.47094	0.0134758	0.0961785
AT1G71830	309.221	-0.464248	0.145558	-3.18943	0.00142554	0.023067
AT4G40060	806.056	-0.464127	0.151343	-3.06672	0.00216418	0.0302944
AT3G11750	142.447	-0.461899	0.180439	-2.55986	0.0104715	0.0829013
AT4G38960/AT2G21320	217.483	-0.461228	0.144642	-3.18875	0.00142891	0.0231038
AT3G44890	164.533	-0.459526	0.126286	-3.63876	0.000273957	0.00702156
AT5G67360	1499.87	-0.459465	0.146726	-3.13146	0.00173942	0.0261656
AT1G03160	169.304	-0.458969	0.146976	-3.12274	0.00179177	0.0267286
AT1G45249	212.299	-0.458285	0.0835378	-5.48595	4.11248e-08	8.09736e-06
AT3G63120	219.626	-0.455058	0.162156	-2.80629	0.00501156	0.0526865
AT5G49215	194.591	-0.454854	0.149385	-3.04485	0.002328	0.0318483
AT5G11450	105.629	-0.454532	0.16002	-2.84047	0.00450473	0.0489709
AT1G79860/AT1G79850	177.943	-0.454502	0.177993	-2.55348	0.0106653	0.0837766
AT1G15930/AT2G32060	2191.74	-0.454228	0.170475	-2.66448	0.00771073	0.0691275
AT5G04800/AT2G04390	1994.83	-0.453825	0.176253	-2.57484	0.0100285	0.0806852
AT2G26730	612.282	-0.452085	0.156261	-2.89314	0.00381409	0.0442973
AT3G26080	140.327	-0.451486	0.165011	-2.7361	0.00621723	0.0601122
AT3G54920	1051.66	-0.448924	0.121625	-3.69106	0.000223324	0.00600892
AT2G37860	92.0196	-0.448161	0.156418	-2.86514	0.00416821	0.0469604
AT5G17870	69.8265	-0.447468	0.169972	-2.6326	0.00847348	0.0730738
AT5G03940	202.012	-0.444524	0.172635	-2.57493	0.0100259	0.0806852
AT5G44670	447.726	-0.443893	0.130477	-3.40208	0.000668739	0.0134952
AT1G54030	372.335	-0.442641	0.17381	-2.5467	0.0108748	0.0847615
AT2G01080	194.973	-0.442376	0.1252	-3.53335	0.000410324	0.00953109
AT5G59090/AT3G46850	795.517	-0.441831	0.158641	-2.7851	0.0053512	0.0549679
AT3G48425	90.0982	-0.440414	0.15438	-2.85279	0.00433378	0.0479286
AT3G43270	217.457	-0.440245	0.119452	-3.68552	0.000228233	0.00612536
AT3G48510	55.4078	-0.437696	0.159418	-2.74559	0.00604013	0.0589136
AT1G55110	361.947	-0.437607	0.159582	-2.74221	0.00610266	0.0593039
AT4G01150	244.198	-0.437027	0.176306	-2.4788	0.0131824	0.0953403
AT5G55540	230.581	-0.435356	0.136934	-3.17932	0.00147621	0.0235078
AT4G31590/AT2G24630	382.776	-0.435317	0.17461	-2.49308	0.012664	0.0928988
AT5G25590	98.2	-0.435158	0.15398	-2.82607	0.00471231	0.050534
AT1G74690/AT1G18840	628.033	-0.435009	0.126672	-3.43414	0.000594439	0.0124366
AT3G20930	56.1453	-0.43399	0.147424	-2.94382	0.00324193	0.0397329
AT5G48450	75.8016	-0.432983	0.169171	-2.55944	0.0104842	0.0829013
AT3G18130	320.9	-0.432733	0.174727	-2.47662	0.0132633	0.0955228
AT4G19410/AT4G19400	880.839	-0.43241	0.172106	-2.51246	0.0119892	0.0896975
AT4G22130	1077.09	-0.431459	0.162992	-2.64711	0.00811829	0.071384
AT5G58000	384.129	-0.430482	0.172506	-2.49546	0.0125793	0.0924768
AT3G02690	84.3992	-0.428557	0.130563	-3.28238	0.00102935	0.0183161
AT3G30300	467.354	-0.427939	0.172737	-2.4774	0.0132344	0.0955228
AT5G66560	221.268	-0.426559	0.159272	-2.67818	0.0074024	0.0673003
AT2G29980	880.1	-0.426128	0.143229	-2.97516	0.00292838	0.036985
AT4G27720	891.237	-0.425473	0.16653	-2.55494	0.0106207	0.0835594
AT1G31850	973.714	-0.425067	0.136712	-3.10922	0.0018758	0.027636
AT3G14980/AT3G14981	153.102	-0.424368	0.171633	-2.47254	0.0134158	0.0960238
AT3G44200	367.132	-0.422991	0.155093	-2.72735	0.00638457	0.0610855
AT5G19090	341.185	-0.421134	0.147478	-2.85558	0.00429581	0.047709
AT3G54390	244.924	-0.421098	0.161648	-2.60504	0.00918646	0.076985
AT2G21250	545.832	-0.420571	0.15441	-2.72373	0.00645496	0.0615075
AT5G67350	241.335	-0.419326	0.128223	-3.27028	0.00107441	0.0188473
AT5G62220	184.682	-0.418624	0.155514	-2.69188	0.00710515	0.0652473
AT1G33265	167.847	-0.417578	0.163106	-2.56015	0.0104626	0.0828665
AT4G34860	676.483	-0.41725	0.143795	-2.9017	0.00371142	0.0435792
AT1G12250	59.6679	-0.416942	0.168776	-2.47039	0.0134966	0.096217
AT1G10522	41.3985	-0.416642	0.150349	-2.77116	0.00558571	0.0564599
AT1G76670/AT1G21070	425.262	-0.41592	0.125611	-3.31118	0.000929046	0.0169719
AT5G50375	264.705	-0.415879	0.155789	-2.6695	0.00759646	0.0684161
AT1G55870	105.545	-0.414027	0.150493	-2.75113	0.00593901	0.058409
AT4G23340	113.254	-0.41341	0.113906	-3.6294	0.00028408	0.00720216
AT5G37020	563.836	-0.412775	0.135138	-3.05448	0.00225454	0.0311466
AT1G17650	119.866	-0.412129	0.159724	-2.58025	0.00987276	0.0801821
AT1G10760	980.966	-0.411533	0.163136	-2.52263	0.0116481	0.0883213
AT5G11470	88.8446	-0.410818	0.122991	-3.34023	0.000837089	0.0157744
AT2G45210	138.161	-0.410789	0.152111	-2.70059	0.00692157	0.0642112
AT5G60210	180.109	-0.41052	0.160135	-2.56358	0.0103597	0.0822687
AT1G78580/AT4G27550	1051.89	-0.410265	0.160976	-2.54861	0.0108152	0.0844418
AT5G45290	244.574	-0.406955	0.16496	-2.46699	0.0136253	0.0966056
AT5G42310	57.446	-0.405838	0.16379	-2.47779	0.0132198	0.0955228
AT3G54740	65.9425	-0.404477	0.152125	-2.65885	0.00784085	0.0699666
AT1G29300/AT2G32130	58.96	-0.403248	0.163524	-2.46598	0.0136637	0.0967633
AT2G22670	976.822	-0.401144	0.144002	-2.78569	0.00534141	0.0549628
AT2G45160	518.614	-0.400792	0.149087	-2.6883	0.00718166	0.065784
AT1G78100	372.048	-0.400781	0.094417	-4.2448	2.18788e-05	0.00107901
AT5G41870	88.4511	-0.399424	0.156072	-2.55923	0.0104905	0.0829013
AT1G79460	100.508	-0.399105	0.161434	-2.47225	0.0134267	0.0960238
AT3G22550	480.64	-0.398316	0.122374	-3.25489	0.00113434	0.0195888
AT4G01800	485.79	-0.398095	0.129361	-3.0774	0.00208817	0.0296704
AT3G45610	67.3459	-0.39716	0.158064	-2.51266	0.0119824	0.0896783
AT1G42980/AT1G31810	165.258	-0.393772	0.122069	-3.22581	0.00125617	0.0209707
AT1G09450	133.979	-0.391224	0.150308	-2.60282	0.00924617	0.077209
AT1G22850	126.663	-0.39046	0.103786	-3.76217	0.000168445	0.00491524
AT4G32295	38.5084	-0.389794	0.15922	-2.44815	0.0143592	0.0997098
AT5G52280	535.122	-0.389514	0.15128	-2.5748	0.0100299	0.0806852
AT2G20300	292.692	-0.389345	0.157758	-2.46798	0.0135877	0.096581
AT4G32710	233.971	-0.389301	0.151507	-2.56952	0.0101839	0.0814252
AT4G26690	269.027	-0.388386	0.155249	-2.5017	0.0123597	0.0914947
AT5G19670	151.535	-0.388344	0.108087	-3.59288	0.000327049	0.00803998
AT5G23850	75.1949	-0.387689	0.15027	-2.57995	0.00988155	0.0801821
AT4G12980	109.63	-0.3867	0.146135	-2.64618	0.0081406	0.0714327
AT3G66658	374.1	-0.386168	0.0915678	-4.21729	2.4726e-05	0.00118933
AT1G06490	224.231	-0.385784	0.155833	-2.47562	0.0133004	0.0956064
AT3G17590	110.992	-0.384879	0.104958	-3.66698	0.000245428	0.00647441
AT2G36230	89.721	-0.383699	0.151956	-2.52507	0.0115677	0.0878544
AT1G03840	118.693	-0.382654	0.103281	-3.70498	0.000211404	0.00575719
AT1G32860	204.517	-0.382007	0.126469	-3.02055	0.00252317	0.0335171
AT5G67130	589.155	-0.381953	0.113081	-3.37769	0.000730984	0.0144198
AT2G39930	313.7	-0.380839	0.115689	-3.29193	0.000995023	0.0178866
AT3G20390	1885.88	-0.380581	0.129703	-2.93425	0.0033435	0.0405298
AT2G38330	97.3299	-0.380191	0.144351	-2.6338	0.00844363	0.0729192
AT3G48670/AT4G01780	460.857	-0.379194	0.123195	-3.07799	0.00208404	0.0296562
AT4G37080	350.23	-0.379177	0.127512	-2.97365	0.00294281	0.0371031
AT5G51820	94.6291	-0.378789	0.104796	-3.61452	0.000300907	0.00752912
AT1G72480	317.333	-0.377142	0.152132	-2.47904	0.0131737	0.09531
AT2G29630	333.139	-0.376914	0.118521	-3.18014	0.00147203	0.0234946
AT4G39040	95.7489	-0.374973	0.149647	-2.50572	0.0122204	0.0909106
AT5G17300	158.345	-0.374636	0.15177	-2.46844	0.0135702	0.0965539
AT2G46630	701.156	-0.374055	0.0859376	-4.35264	1.34508e-05	0.00074574
AT2G26470	62.5398	-0.373152	0.135428	-2.75535	0.0058629	0.0580176
AT3G27870	616.88	-0.373079	0.152182	-2.45153	0.0142249	0.098973
AT4G22760	64.8194	-0.372054	0.143282	-2.59666	0.00941343	0.0782027
AT2G46950/AT2G46960	1146.21	-0.3706	0.113233	-3.27289	0.00106453	0.0187208
AT3G12345	62.9359	-0.369081	0.148006	-2.49369	0.0126422	0.0928383
AT1G19430	401.485	-0.368632	0.11307	-3.26021	0.00111328	0.0193521
AT2G01913	117.848	-0.365785	0.148314	-2.46629	0.013652	0.0967442
AT1G60960	653.604	-0.365251	0.123154	-2.9658	0.003019	0.0378371
AT1G16920	445.86	-0.36485	0.131055	-2.78395	0.00537014	0.0550312
AT1G66350	146.409	-0.364216	0.143349	-2.54076	0.0110613	0.085519
AT3G59010	101.156	-0.362806	0.140543	-2.58145	0.00983865	0.0801055
AT5G08130	611.795	-0.362461	0.0976996	-3.70996	0.000207295	0.00568575
AT1G19920	841.88	-0.361722	0.142231	-2.5432	0.0109842	0.085236
AT5G57130	610.451	-0.360924	0.135943	-2.65497	0.00793155	0.0703291
AT1G19330	288.504	-0.360803	0.0932075	-3.87096	0.000108407	0.00353547
AT4G39120	180.179	-0.360597	0.0919428	-3.92197	8.78271e-05	0.00299893
AT2G35620	1061.05	-0.360322	0.13204	-2.72888	0.00635494	0.0609403
AT3G03450	33.3376	-0.360314	0.146648	-2.45699	0.0140106	0.0981298
AT4G18460	563.799	-0.359258	0.114569	-3.13574	0.00171421	0.0259164
AT5G20640	173.865	-0.358429	0.131397	-2.72784	0.00637511	0.0610504
AT2G42880	507.532	-0.358028	0.139398	-2.56839	0.0102172	0.0814658
AT5G63940	834.083	-0.355869	0.0975048	-3.64976	0.000262484	0.00679362
AT3G57030	564.215	-0.355491	0.102729	-3.46046	0.000539249	0.0115574
AT2G33320	120.876	-0.35489	0.136635	-2.59735	0.00939454	0.0781074
AT5G53860	370.269	-0.354439	0.128502	-2.75824	0.00581144	0.0576915
AT1G15910/AT2G16490	1213.66	-0.353123	0.123957	-2.84876	0.00438905	0.0482613
AT2G32560/AT2G26850	146.61	-0.352552	0.134648	-2.61832	0.00883635	0.0752482
AT3G02600	273.532	-0.35238	0.132799	-2.65348	0.00796672	0.0705222
AT5G57590	188.345	-0.351361	0.131235	-2.67733	0.00742106	0.0673465
AT4G03190	515.693	-0.351041	0.108506	-3.23522	0.00121549	0.0204536
AT5G62890	2593.45	-0.351016	0.101888	-3.44511	0.000570829	0.0120383
AT2G01760/AT2G01755	64.9597	-0.348022	0.138471	-2.51333	0.0119599	0.089605
AT5G01660	99.627	-0.347337	0.117712	-2.95073	0.00317023	0.0391962
AT1G20330	792.412	-0.347173	0.0684711	-5.07036	3.97066e-07	5.4028e-05
AT5G18260	157.389	-0.345281	0.108545	-3.18098	0.00146779	0.0234445
AT3G13040	575.44	-0.345109	0.111908	-3.08387	0.00204328	0.0293641
AT3G06130	413.549	-0.344426	0.121488	-2.83506	0.00458165	0.0496023
AT3G55040	133.68	-0.34431	0.132608	-2.59644	0.00941943	0.0782172
AT2G26100	102.009	-0.34276	0.102312	-3.35013	0.000807727	0.0154531
AT1G69420	277.286	-0.339288	0.128336	-2.64374	0.00819956	0.0716693
AT1G78610	486.412	-0.338835	0.135749	-2.49604	0.0125589	0.0924768
AT3G15790	171.254	-0.335692	0.111471	-3.01146	0.00259995	0.0342991
AT1G29700	213.952	-0.334768	0.109353	-3.06135	0.00220341	0.0306615
AT1G54510	550.558	-0.333984	0.111751	-2.98864	0.00280224	0.0359547
AT5G03650	461.701	-0.33397	0.13053	-2.55857	0.0105103	0.0829841
AT5G20070	1208.28	-0.333697	0.113414	-2.94229	0.00325797	0.0398359
AT1G17110	539.977	-0.33324	0.11677	-2.85382	0.00431975	0.0478237
AT5G19740	293.642	-0.331033	0.125139	-2.64533	0.00816116	0.0714327
AT3G09040	127.201	-0.330605	0.124075	-2.66456	0.00770899	0.0691275
AT1G78120	470.066	-0.329495	0.125864	-2.61786	0.00884837	0.0752898
AT1G72770/AT1G17545	618.812	-0.329095	0.121235	-2.71453	0.00663696	0.0624955
AT1G27200	226.713	-0.328141	0.0935383	-3.50809	0.000451336	0.0101807
D7MB97	184.179	-0.327108	0.118782	-2.75384	0.0058901	0.0581502
AT4G22290	350.759	-0.326906	0.0871893	-3.74939	0.000177268	0.00510203
AT4G16060	139.682	-0.326875	0.118472	-2.7591	0.00579617	0.05761
AT3G19720	281.272	-0.326794	0.13312	-2.45488	0.014093	0.09838
AT5G47840	240.459	-0.326144	0.086123	-3.78695	0.000152505	0.0045769
AT1G20370/AT1G20290	224.415	-0.326107	0.116047	-2.81012	0.00495223	0.0523295
AT4G12700	325.016	-0.323921	0.103087	-3.14221	0.0016768	0.0254884
AT5G08390	711.154	-0.323879	0.126285	-2.56467	0.0103275	0.0821054
AT1G62050/AT1G11740	52.2142	-0.320583	0.127413	-2.5161	0.0118663	0.089338
AT5G48500/AT2G10930	229.971	-0.319975	0.129756	-2.46598	0.0136639	0.0967633
AT2G18710	110.975	-0.319586	0.1204	-2.65437	0.00794575	0.0703662
AT1G10330	242.578	-0.317439	0.103858	-3.05649	0.00223945	0.031036
AT3G21190	1779.44	-0.317435	0.103665	-3.06212	0.00219775	0.0306029
AT1G80030	163.066	-0.317416	0.114268	-2.77782	0.00547243	0.055778
AT5G48910	60.7375	-0.317058	0.122467	-2.58891	0.00962789	0.0790798
AT5G16720	114.755	-0.314906	0.122285	-2.57518	0.0100188	0.0806852
AT4G01310	226.375	-0.314132	0.109243	-2.87553	0.00403348	0.0460582
AT1G17220	397.415	-0.311476	0.125968	-2.47267	0.0134107	0.0960238
AT2G44830	306.809	-0.310069	0.10855	-2.85648	0.00428372	0.047625
AT5G35220	125.865	-0.30907	0.106358	-2.90593	0.0036616	0.0430643
AT3G62630	106.65	-0.308526	0.124863	-2.47093	0.0134763	0.0961785
AT1G67420	234.756	-0.30838	0.0940693	-3.27823	0.00104462	0.0184631
AT4G17770	541.479	-0.307269	0.117858	-2.60712	0.00913081	0.0767634
AT1G13380	320.351	-0.307188	0.12001	-2.55969	0.0104765	0.0829013
AT2G20210	60.4263	-0.306986	0.120676	-2.54388	0.0109628	0.0851012
AT3G48210	309.11	-0.30438	0.117415	-2.59235	0.00953237	0.0786327
AT4G16442	310.453	-0.302683	0.119456	-2.53385	0.0112816	0.0866814
AT3G24590	455.556	-0.302453	0.122887	-2.46123	0.0138461	0.0974638
AT1G30330	750.819	-0.302104	0.11804	-2.55933	0.0104875	0.0829013
AT4G30520	1371.78	-0.301675	0.0800793	-3.76721	0.000165084	0.00483727
AT3G62220	378.975	-0.300137	0.0877255	-3.42131	0.000623194	0.0127967
AT2G43950	257.283	-0.298518	0.104472	-2.8574	0.00427131	0.0475624
AT2G24230	161.218	-0.298263	0.110706	-2.69419	0.00705605	0.0649567
AT4G14920	376.069	-0.298211	0.116339	-2.56329	0.0103685	0.082301
AT3G48150	98.7984	-0.297675	0.121368	-2.45267	0.01418	0.0988567
AT3G01820	615.179	-0.294774	0.0864465	-3.4099	0.000649878	0.0132159
AT3G13180	157.635	-0.294384	0.112581	-2.61486	0.00892636	0.0756871
AT5G58090	368.025	-0.294035	0.102123	-2.87922	0.00398656	0.0456783
AT5G16750	520.03	-0.291448	0.104421	-2.79108	0.00525328	0.0543596
AT2G31320	244.14	-0.290955	0.114301	-2.54551	0.010912	0.0849255
AT3G06550	577.538	-0.290729	0.0974626	-2.98298	0.00285456	0.0363823
AT2G34310	295.279	-0.290007	0.0739944	-3.91932	8.88001e-05	0.00302236
AT3G07700	438.943	-0.289946	0.115291	-2.51492	0.0119061	0.0894465
AT5G14620	285.799	-0.289839	0.110369	-2.6261	0.00863704	0.0739395
AT5G13650	557.984	-0.289698	0.0892005	-3.24771	0.00116336	0.01996
AT3G23890	411.214	-0.288954	0.117594	-2.45721	0.0140021	0.0981298
AT4G37920	65.0872	-0.287704	0.11155	-2.57915	0.00990434	0.0802556
AT4G34588	2653.1	-0.283239	0.113857	-2.48767	0.0128583	0.0939023
AT5G28150	139.437	-0.28189	0.101362	-2.78101	0.00541907	0.0553681
AT2G39190	344.778	-0.281551	0.0792815	-3.55129	0.00038335	0.00905428
AT3G24460	241.277	-0.28086	0.110096	-2.55106	0.0107397	0.0840507
AT1G27470	72.2586	-0.279397	0.111387	-2.50835	0.0121295	0.0904265
AT1G16880	632.048	-0.277738	0.0949581	-2.92485	0.00344626	0.0413002
AT2G29690	233.862	-0.277467	0.0967126	-2.86898	0.00411797	0.0466438
AT3G23300	1265.02	-0.276508	0.0889298	-3.10929	0.00187537	0.027636
AT1G29750	361.842	-0.276363	0.101816	-2.71432	0.00664114	0.0624955
AT3G02875	488.591	-0.275886	0.0944455	-2.92112	0.00348778	0.0416556
AT5G54390	752.755	-0.273207	0.101368	-2.69519	0.0070349	0.0648859
AT1G64530	1160.05	-0.272935	0.106016	-2.57447	0.0100393	0.0806852
AT1G62330/AT1G11990	508.24	-0.271783	0.0859009	-3.16391	0.00155664	0.0244107
AT3G06410	472.623	-0.270929	0.0722965	-3.74748	0.000178623	0.00510614
AT5G30510	308.634	-0.270411	0.101792	-2.6565	0.00789558	0.0701323
AT3G01180	322.763	-0.269386	0.10025	-2.68715	0.00720654	0.065926
AT5G52820	571.207	-0.267583	0.0761238	-3.51511	0.000439575	0.0099795
AT5G48660	116.959	-0.267046	0.106786	-2.50077	0.0123924	0.0916083
AT4G00740	824.652	-0.266586	0.0961894	-2.77147	0.00558045	0.0564599
AT5G14210	300.214	-0.26601	0.103468	-2.57094	0.0101423	0.0811247
AT5G62190	2752.32	-0.265431	0.0992212	-2.67515	0.00746966	0.0676184
AT1G55140	85.6294	-0.265402	0.10459	-2.53754	0.0111634	0.0860246
AT2G33310	820.921	-0.263846	0.0774199	-3.40798	0.000654454	0.0132961
AT5G25752	177.362	-0.263441	0.0964898	-2.73025	0.0063287	0.0608504
AT3G09090	741.471	-0.263286	0.102165	-2.57707	0.00996426	0.0806171
AT5G37530	154.942	-0.261957	0.0967922	-2.70638	0.00680203	0.0634655
AT1G63700	354.87	-0.261748	0.106229	-2.46401	0.0137394	0.0971656
AT5G66590	1284.76	-0.260851	0.0668096	-3.9044	9.44591e-05	0.00316385
AT3G19820	4060.68	-0.260008	0.104725	-2.48276	0.013037	0.0947505
AT5G54600	165.047	-0.259883	0.105503	-2.46328	0.0137672	0.0972336
AT1G12930	588.739	-0.253779	0.0912291	-2.78178	0.0054062	0.0553171
AT3G20000	260.162	-0.25338	0.0866983	-2.92255	0.00347174	0.0415348
AT4G01040	484.152	-0.252327	0.0771531	-3.27047	0.0010737	0.0188473
AT2G25420	278.784	-0.25192	0.0983038	-2.56267	0.0103872	0.0823936
AT5G26850	621.335	-0.250636	0.0808463	-3.10016	0.00193418	0.0281223
AT3G51950	835.457	-0.248845	0.0722079	-3.44623	0.000568457	0.0120123
AT5G50250	180.157	-0.248143	0.096794	-2.56362	0.0103588	0.0822687
AT1G17550	182.036	-0.247074	0.0891421	-2.77169	0.00557665	0.0564579
AT3G24190	550.771	-0.246436	0.0978472	-2.51858	0.011783	0.0889123
AT5G12950/AT5G12960	463.048	-0.245679	0.0925465	-2.65466	0.00793895	0.0703355
AT5G64600	256.336	-0.245556	0.0999245	-2.45742	0.0139941	0.0981298
AT4G36195/AT2G18080	3819.56	-0.245215	0.0821919	-2.98345	0.0028502	0.0363486
AT2G01820	2652.38	-0.244506	0.0962795	-2.53954	0.0110998	0.0857226
AT3G54660	471.153	-0.244241	0.0814199	-2.99977	0.0027018	0.0352237
AT2G30700	286.905	-0.243613	0.0721157	-3.37808	0.000729929	0.0144125
AT1G72500	825.705	-0.243076	0.0698682	-3.47907	0.000503154	0.0109622
AT3G02050	598.672	-0.242826	0.0831438	-2.92055	0.00349415	0.0416845
AT3G63190	200.853	-0.242351	0.08929	-2.7142	0.00664362	0.0624955
AT5G08430	295.53	-0.241749	0.0820986	-2.94461	0.00323357	0.0396767
AT1G43580	411.636	-0.240319	0.0961557	-2.49927	0.0124449	0.0918671
AT3G14720	1413	-0.238895	0.0964994	-2.47561	0.0133009	0.0956064
AT5G01500	257.978	-0.236143	0.094409	-2.50127	0.0123747	0.0915269
AT1G31050/AT2G10931	783.696	-0.234373	0.0853194	-2.74701	0.00601411	0.0587155
AT5G20380	200.053	-0.234145	0.0909323	-2.57494	0.0100257	0.0806852
AT3G23640	951.796	-0.231042	0.0936496	-2.46709	0.0136216	0.0966056
AT4G33780	254.273	-0.23072	0.0855287	-2.69757	0.00698468	0.0645819
AT1G55930	346.114	-0.228441	0.0849403	-2.68943	0.00715752	0.0655914
AT3G50780/AT2G24692	431.346	-0.227679	0.0856199	-2.65919	0.00783294	0.0699256
AT4G31340	2372.41	-0.226844	0.0872106	-2.6011	0.00929251	0.0775038
AT4G34730	299.872	-0.22564	0.074062	-3.04664	0.00231411	0.0317407
AT2G47490	744.237	-0.224696	0.0692407	-3.24514	0.00117393	0.0200424
AT1G50660	732.099	-0.223741	0.0859593	-2.60287	0.00924467	0.077209
AT5G24300	390.723	-0.221088	0.0819653	-2.69733	0.00698969	0.0645872
AT3G20040	628.993	-0.220315	0.0823807	-2.67435	0.00748744	0.0677309
AT2G35020	256.342	-0.220187	0.0890084	-2.47378	0.0133691	0.0960238
AT5G20280	633.738	-0.218963	0.0704728	-3.10705	0.00188964	0.0277671
AT5G58270	675.107	-0.218501	0.0810011	-2.69751	0.00698605	0.0645819
AT5G16550	326.232	-0.21786	0.0876779	-2.48478	0.0129632	0.0943708
AT1G66510	167.216	-0.217827	0.0835615	-2.60679	0.00913951	0.0767634
AT1G04870	561.94	-0.217151	0.0745766	-2.91178	0.00359372	0.0424804
AT1G08400	179.495	-0.215249	0.076595	-2.81023	0.00495066	0.0523295
AT5G50870	689.95	-0.214047	0.0724094	-2.95606	0.00311595	0.0387068
AT5G58490	985.981	-0.207936	0.0791301	-2.62777	0.00859456	0.0737177
AT2G32070	2421.43	-0.206372	0.0805137	-2.56319	0.0103716	0.082301
AT5G49970	314.948	-0.202756	0.0825583	-2.45591	0.0140527	0.0982288
AT4G13430	1607.63	-0.197109	0.0707714	-2.78515	0.00535033	0.0549679
AT5G24020	214.283	-0.195938	0.0776741	-2.52257	0.0116501	0.0883213
AT5G45275	500.693	-0.195752	0.0728692	-2.68634	0.00722386	0.066027
AT2G30980	1590.04	-0.19549	0.0665994	-2.93531	0.0033321	0.0404789
AT3G27740	739.31	-0.193284	0.0697512	-2.77105	0.00558757	0.0564599
AT4G38500	465.149	-0.192682	0.0756291	-2.54772	0.0108429	0.0845443
AT5G62390	4967.23	-0.187088	0.0688596	-2.71694	0.0065888	0.06222
AT1G20770	237.059	-0.186813	0.0656314	-2.8464	0.00442162	0.0485433
AT2G38280	2399.9	-0.186057	0.0706438	-2.63373	0.00844516	0.0729192
AT5G11150	306.365	-0.184835	0.0731703	-2.52609	0.0115339	0.0877878
AT1G76880	712.996	-0.180183	0.065046	-2.77009	0.00560409	0.0565725
AT3G57050	459.39	-0.179708	0.0588771	-3.05226	0.00227125	0.0312954
AT2G32710	458.629	-0.178739	0.0596563	-2.99615	0.0027341	0.0354206
AT5G11880/AT3G14390	1165.55	-0.177527	0.0622416	-2.85223	0.00434136	0.047937
AT4G32330	1605.67	-0.176281	0.0720196	-2.44767	0.0143781	0.099784
AT1G49890	420.877	-0.170089	0.0540483	-3.14699	0.00164962	0.0252985
AT5G13050	195.648	-0.167959	0.0683746	-2.45644	0.014032	0.0982288
AT1G73180	524.359	-0.161577	0.0413675	-3.9059	9.38758e-05	0.00315844
AT2G45950	2968.71	-0.158995	0.051722	-3.07403	0.00211185	0.0299009
AT5G19280	688.59	-0.158205	0.0477259	-3.31487	0.00091687	0.0168117
AT5G02850	316.217	-0.157983	0.0628547	-2.51347	0.011955	0.0896011
AT5G64170	1518.75	-0.157784	0.0574891	-2.74459	0.00605873	0.059036
AT1G10950	883.157	-0.151051	0.0610911	-2.47256	0.0134149	0.0960238
AT3G62300	426.634	-0.1433	0.0565585	-2.53366	0.011288	0.0866989
AT1G17370	1334.55	-0.14271	0.0554402	-2.57413	0.0100493	0.0806852
AT2G41500/AT2G05720	320.199	-0.141914	0.0560932	-2.52996	0.0114074	0.0871693
AT1G54350	1175.9	-0.138151	0.0523435	-2.63932	0.00830735	0.0722026
AT3G20050	834.97	-0.129837	0.0438242	-2.96267	0.0030498	0.0380646
AT5G67320	420.821	-0.123797	0.0480498	-2.57642	0.00998284	0.0806852
AT2G22400	1233.12	-0.111773	0.0437032	-2.55756	0.010541	0.0831442
AT1G04510	1420.22	-0.104356	0.0420382	-2.4824	0.0130501	0.0948066
AT4G28260	850.203	0.12425	0.0394829	3.14694	0.0016499	0.0252985
AT5G14250	613.216	0.124997	0.0509008	2.45569	0.0140613	0.0982564
AT3G61570	767.698	0.128351	0.0524235	2.44835	0.0143513	0.0996877
AT4G32060	1502.01	0.151488	0.0598523	2.53104	0.0113726	0.0870942
AT5G19990	495.316	0.15221	0.0467911	3.25298	0.001142	0.0196823
AT5G25265	1715.93	0.156781	0.0584887	2.68053	0.00735065	0.0669246
AT3G43240	614.963	0.157108	0.0481393	3.26362	0.00109997	0.019168
AT5G22350	588.924	0.158002	0.0549726	2.87421	0.00405045	0.0462039
AT2G45440	717.091	0.160711	0.0592098	2.71426	0.00664241	0.0624955
AT3G26670	369.186	0.160913	0.0510883	3.1497	0.00163441	0.0252077
AT4G24940	497.81	0.161122	0.0545401	2.9542	0.00313482	0.0388725
AT5G18420	228.933	0.166485	0.0641245	2.59628	0.00942405	0.0782172
AT3G46060	681.35	0.168474	0.063539	2.65151	0.00801321	0.0707553
AT5G62260	443.952	0.169697	0.0659084	2.57474	0.0100315	0.0806852
AT1G77840	470.129	0.169808	0.0663705	2.55849	0.0105128	0.0829841
AT2G22090/AT2G22088	285.452	0.172345	0.06876	2.50647	0.0121943	0.0908128
AT2G44520	625.17	0.172388	0.0560183	3.07735	0.00208853	0.0296704
AT5G03470	611.434	0.174536	0.0700188	2.49271	0.0126774	0.0929023
AT1G17120	596.629	0.175113	0.0708016	2.47329	0.0133876	0.0960238
AT2G26970	555.886	0.176184	0.0709607	2.48284	0.0130341	0.0947505
AT4G32520	380.506	0.178985	0.0637277	2.80859	0.00497589	0.0524685
AT3G48750	443.536	0.180195	0.0631456	2.85364	0.00432214	0.047825
AT5G57020/AT2G44175	731.234	0.180934	0.0731939	2.47198	0.0134365	0.0960247
AT5G54900	1415.9	0.181794	0.0499499	3.63952	0.000273147	0.00701789
AT2G42780	647.293	0.181892	0.0677965	2.68292	0.00729832	0.0665921
AT2G19540	559.812	0.183935	0.0691913	2.65835	0.00785232	0.0700096
AT3G02450	122.433	0.183953	0.074554	2.46738	0.0136106	0.0966056
Q94A40	150.298	0.18615	0.0704868	2.64092	0.00826811	0.0720101
AT3G22590	293.782	0.18946	0.0696198	2.72135	0.00650153	0.0617279
AT5G54760	1301.83	0.189701	0.059034	3.21343	0.00131161	0.021673
AT4G32600	602.555	0.189907	0.0633605	2.99724	0.00272436	0.0353864
AT1G09430	819.477	0.190404	0.0674575	2.82257	0.00476404	0.0509746
AT4G34460	1418.62	0.192662	0.0763921	2.52201	0.0116686	0.0883973
AT5G27470	339.663	0.194396	0.0779792	2.49292	0.0126698	0.0929023
AT3G59920	2392.39	0.194924	0.0730916	2.66684	0.00765681	0.0688198
AT4G00330	857.469	0.195464	0.0790624	2.47227	0.0134258	0.0960238
AT5G09740	683.493	0.195639	0.0791034	2.47321	0.0133906	0.0960238
AT5G58290	424.122	0.197988	0.0693643	2.85432	0.00431289	0.0477936
AT3G10640	1008.57	0.199076	0.0789795	2.52061	0.0117153	0.0886135
AT1G52760	1781.46	0.199892	0.073387	2.72381	0.00645345	0.0615075
AT4G30480	604.633	0.200049	0.0537407	3.72248	0.000197275	0.0054766
AT3G05970	843.989	0.200487	0.0703614	2.84938	0.00438045	0.0481918
AT5G46630	721.326	0.201268	0.0681476	2.95341	0.0031428	0.0389166
AT1G15340	1234.78	0.201491	0.0757651	2.65941	0.00782767	0.0699232
AT3G54350	570.59	0.201801	0.0783004	2.57727	0.00995856	0.0806019
AT1G69010	359.367	0.204341	0.0612652	3.33535	0.000851922	0.0158694
AT1G26640	131.613	0.204777	0.0791185	2.58823	0.00964702	0.079106
AT5G40760	1707.38	0.204812	0.0801681	2.55478	0.0106254	0.0835594
AT4G04910	243.383	0.20504	0.0781949	2.62217	0.00873727	0.0746157
AT3G60850	597.016	0.20632	0.0691377	2.98418	0.00284336	0.0363054
AT3G17440	462.691	0.206459	0.0796068	2.59348	0.00950094	0.0785466
AT5G07270	546.983	0.20845	0.0490592	4.24895	2.14776e-05	0.00106631
AT3G46440	1575.58	0.209752	0.0840358	2.49599	0.0125607	0.0924768
AT5G65270/AT5G46025	850.231	0.210464	0.0740484	2.84225	0.00447962	0.0488442
AT5G37850	429.86	0.210695	0.0836158	2.51979	0.0117424	0.0887491
AT4G02450	174.284	0.210739	0.0735261	2.86619	0.00415449	0.0468809
AT2G04520	450.385	0.212133	0.0665819	3.18604	0.00144233	0.0232764
AT3G30380	302.296	0.213937	0.0711601	3.00641	0.00264352	0.0347217
AT5G23520	208.716	0.214809	0.072735	2.9533	0.00314392	0.0389166
AT1G04750	4050.98	0.215431	0.0779114	2.76507	0.00569101	0.0570855
AT5G21990	1038.64	0.216535	0.087851	2.4648	0.0137091	0.0969857
AT4G27020	703.689	0.216569	0.0832675	2.60089	0.00929835	0.0775218
AT1G35470	752.329	0.217032	0.0796707	2.72412	0.0064474	0.0614911
AT5G47140	288.593	0.217152	0.0867274	2.50385	0.012285	0.0911661
AT4G15410	540.805	0.217191	0.0780039	2.78436	0.00536336	0.0550312
AT5G05100	611.894	0.218422	0.089241	2.44756	0.0143829	0.099784
AT5G58060	1315.75	0.221153	0.0861201	2.56797	0.0102297	0.0814821
AT4G21534	892.552	0.221436	0.074786	2.96093	0.00306711	0.0382354
AT5G64500	704.222	0.221687	0.0709945	3.12259	0.00179265	0.0267286
AT3G66654	808.708	0.221946	0.0863962	2.56893	0.0102013	0.0814385
AT1G43860	303.392	0.224628	0.0684789	3.28025	0.00103714	0.0184081
AT5G22330	108.861	0.224945	0.085717	2.62427	0.00868338	0.0742457
AT2G28840	6449.27	0.225125	0.080327	2.80261	0.00506912	0.053106
AT5G63970	1182.62	0.225274	0.0856178	2.63116	0.00850934	0.0732631
AT1G73340	956.135	0.22686	0.0755294	3.00359	0.00266811	0.0349142
AT5G38470	1478.23	0.22704	0.0739749	3.06915	0.00214666	0.0301706
AT1G13460	821.73	0.227909	0.0780755	2.91909	0.00351056	0.0417954
AT2G43960	654.618	0.228079	0.0778206	2.93084	0.0033805	0.0407439
AT5G64440	987.781	0.228586	0.0797274	2.86709	0.0041426	0.0467969
AT4G02720	312.842	0.229229	0.0742749	3.08623	0.00202711	0.0291915
AT3G56190	1161.96	0.229841	0.0768719	2.98992	0.0027905	0.0358477
AT4G36750	671.507	0.230471	0.0684319	3.36788	0.000757472	0.014845
AT5G54590	211.065	0.230678	0.0871531	2.64682	0.00812529	0.0714158
AT3G03890	238.676	0.230934	0.0935694	2.46805	0.0135852	0.096581
AT4G02570	4910.32	0.230937	0.0908273	2.5426	0.0110031	0.0852885
AT4G17080	725.201	0.231058	0.088234	2.6187	0.00882664	0.0752264
AT3G57280	413.106	0.232902	0.0893381	2.60698	0.00913459	0.0767634
AT3G49060	469.264	0.234871	0.0853448	2.75202	0.00592285	0.0583627
AT4G23470	1642.41	0.235015	0.0860871	2.72997	0.00633401	0.0608504
AT1G22040	501.541	0.235151	0.0871037	2.69967	0.00694084	0.064305
AT5G54500/AT4G27270	2182.12	0.235531	0.0934453	2.52052	0.0117181	0.0886135
AT3G52220	589.733	0.235837	0.0863572	2.73095	0.0063152	0.0608084
AT5G45550/AT4G19045	800.746	0.23608	0.0865198	2.72863	0.00635981	0.0609593
AT4G24990	880.884	0.236107	0.0892223	2.64628	0.00813826	0.0714327
AT4G22740	337.2	0.237448	0.0652779	3.63749	0.00027531	0.0070391
AT1G16180	5820.44	0.237525	0.0959126	2.47648	0.0132687	0.0955228
AT2G19880	662.374	0.2393	0.0881215	2.71557	0.00661625	0.0624233
AT5G04920	471.275	0.240154	0.0907458	2.64645	0.00813409	0.0714327
AT5G44250	443.896	0.241724	0.0854024	2.83042	0.00464875	0.0501228
AT2G44600	396.411	0.241954	0.0839028	2.88374	0.00392984	0.0452425
AT3G48780	480.329	0.242112	0.0844547	2.86677	0.0041469	0.0468204
AT5G10190	330.283	0.242263	0.0918837	2.63662	0.00837356	0.0725387
AT4G27540	113.119	0.242432	0.0981215	2.47073	0.0134836	0.096198
AT5G43280	263.7	0.243002	0.0929376	2.61468	0.00893099	0.0756871
AT1G59830/AT1G10430	781.521	0.243381	0.092856	2.62106	0.00876574	0.0747981
AT4G32070	493.413	0.243466	0.0983115	2.47647	0.0132688	0.0955228
AT5G01990	483.744	0.244256	0.0842635	2.89872	0.00374689	0.0437848
AT5G27840	409.665	0.245283	0.0836599	2.93191	0.00336887	0.0406736
AT5G35200	2484.84	0.245501	0.0982485	2.49877	0.0124624	0.0919645
AT1G48210	261.358	0.246111	0.092546	2.65934	0.00782935	0.0699232
AT2G39795/AT2G39790	175.234	0.247812	0.0957183	2.58898	0.00962616	0.0790798
AT4G22820	1253.96	0.247977	0.0980309	2.52958	0.0114199	0.0871738
AT5G13970	240.522	0.248388	0.0936254	2.653	0.00797807	0.0705931
AT4G26100	148.228	0.249064	0.0887978	2.80484	0.00503414	0.0528183
AT1G33990	743.922	0.250108	0.0980382	2.55112	0.0107376	0.0840507
AT5G19350	731.559	0.250203	0.0931051	2.68731	0.00720291	0.0659254
AT1G62740	199.754	0.251708	0.100586	2.50241	0.0123352	0.0913774
AT4G00355	1184	0.251838	0.0905009	2.78271	0.00539065	0.0552116
AT5G61500	640.354	0.251878	0.0991487	2.54041	0.0110723	0.0855414
AT4G26500	107.798	0.251907	0.0991462	2.54076	0.0110612	0.085519
AT4G39520	379.414	0.252534	0.0975365	2.58913	0.00962199	0.0790798
AT4G24590	553.21	0.254343	0.0963616	2.63946	0.00830382	0.0722017
AT5G48630	162.47	0.254566	0.101044	2.51935	0.0117571	0.0887491
AT3G05165/AT1G54730	1819.96	0.255556	0.0697713	3.66276	0.000249508	0.00654625
AT5G66675	209.613	0.25581	0.0990304	2.58314	0.00979045	0.0799478
AT2G43250	222.939	0.256257	0.0938854	2.72946	0.00634376	0.0609157
AT3G12300	98.3484	0.256887	0.102258	2.51213	0.0120003	0.089749
AT1G80910	648.37	0.257928	0.104912	2.45852	0.0139509	0.0978748
AT5G40670	496.481	0.257934	0.0956661	2.69619	0.00701368	0.0647804
AT3G49590	605.001	0.259009	0.076047	3.40591	0.000659437	0.0133715
AT1G69060	294.22	0.259023	0.104377	2.48161	0.0130792	0.0948808
AT5G53310	867.24	0.259508	0.089162	2.91052	0.00360825	0.0425636
AT3G25545	404.563	0.261687	0.101354	2.58191	0.00982551	0.0801055
AT4G14622/AT4G14620	381.167	0.262382	0.0923518	2.84111	0.00449568	0.048944
AT3G49601	1120.14	0.263038	0.104532	2.51635	0.0118577	0.089338
AT3G21530	215.838	0.263142	0.102305	2.57214	0.0101073	0.0809998
AT4G28400	1885.76	0.263349	0.0955355	2.75656	0.00584126	0.0578851
AT3G14075	408.491	0.263559	0.0985248	2.67505	0.00747179	0.0676184
AT1G16930	478.608	0.264852	0.0919718	2.87971	0.00398047	0.0456556
AT3G52280	260.447	0.264891	0.100126	2.64558	0.00815502	0.0714327
AT2G47470	864.852	0.26527	0.0663493	3.99808	6.38577e-05	0.00236442
AT1G31350	192.108	0.265665	0.101259	2.62361	0.0087004	0.0743586
AT1G22970	212.553	0.265788	0.0804825	3.30243	0.000958513	0.0173637
AT4G15093	1041.97	0.265848	0.103024	2.58045	0.00986725	0.0801821
AT1G15860	857.049	0.266125	0.0972509	2.73648	0.00621012	0.0600711
AT1G27650/AT1G27640	400.713	0.266601	0.107957	2.46952	0.0135295	0.0963947
AT1G27000	2071.75	0.26738	0.106809	2.50334	0.0123027	0.0912021
AT1G59580	1479.63	0.269654	0.108823	2.47791	0.0132153	0.0955228
AT2G42400	565.888	0.270236	0.104974	2.57432	0.0100437	0.0806852
AT1G59520	349.522	0.270936	0.065785	4.11852	3.81321e-05	0.00162296
AT3G25030	282.958	0.271325	0.102925	2.63614	0.00838549	0.0725824
AT2G19830	1324.39	0.27175	0.105308	2.58054	0.00986467	0.0801821
AT3G15640	226.152	0.271989	0.0980752	2.77327	0.00554967	0.0563201
AT3G09740	1426.96	0.272593	0.0975853	2.79338	0.00521598	0.0540798
AT1G07030/AT1G07025	433.136	0.273197	0.108798	2.51105	0.0120373	0.0899935
AT5G47730	926.854	0.273654	0.09934	2.75472	0.00587425	0.0580482
AT2G39660	155.306	0.27502	0.0929714	2.95811	0.00309527	0.0385026
AT5G09260	666.83	0.275044	0.101174	2.71851	0.00655757	0.0620921
AT3G27190	1618.34	0.27588	0.098556	2.79922	0.0051226	0.0535067
AT4G16765	276.568	0.275974	0.0936708	2.94621	0.00321692	0.0395645
AT4G24500	131.808	0.276523	0.091571	3.01977	0.0025297	0.0335827
AT2G46940	133.394	0.277189	0.109272	2.53669	0.0111906	0.0861393
AT3G03740	463.952	0.277282	0.0978616	2.83341	0.00460539	0.0497943
AT3G29170	291.022	0.278107	0.108927	2.55315	0.0106755	0.083797
AT4G36800	413.054	0.278197	0.0982161	2.8325	0.00461862	0.0498697
AT2G43850	213.473	0.279062	0.112663	2.47696	0.0132506	0.0955228
AT5G09680	659.264	0.279508	0.109818	2.54518	0.0109221	0.0849413
AT1G31470	369.479	0.279696	0.100906	2.77184	0.00557402	0.0564579
AT2G36060	1434.53	0.279749	0.0851124	3.28682	0.00101324	0.018106
AT1G73950	1700.68	0.280175	0.107616	2.60346	0.00922872	0.0771856
AT2G30600	1136.43	0.280347	0.0997323	2.81099	0.00493887	0.0523132
AT4G15070	498.285	0.280447	0.0997177	2.81241	0.00491722	0.0521107
AT4G26750	589.83	0.281055	0.111108	2.52957	0.0114201	0.0871738
AT1G65720	3790.88	0.281316	0.112856	2.4927	0.0126777	0.0929023
AT2G01680	703.297	0.282886	0.0874209	3.2359	0.00121259	0.0204375
AT1G76970	2405.18	0.28308	0.0826177	3.42638	0.000611682	0.0126924
AT1G79340	2569.07	0.283607	0.0849582	3.3382	0.000843237	0.0158104
AT4G31410	511.824	0.284005	0.0998299	2.84489	0.00444263	0.0485856
AT4G11860	322.016	0.285031	0.11181	2.54923	0.0107961	0.0843643
AT3G09810	671.642	0.285123	0.101475	2.80977	0.00495765	0.0523295
AT4G23850/AT4G11030	5383.32	0.28572	0.10257	2.7856	0.00534288	0.0549628
AT4G16850	271.14	0.28636	0.107141	2.67274	0.00752337	0.0679684
AT4G24530/AT4G03320	526.63	0.286508	0.100087	2.8626	0.00420186	0.0471127
AT1G14380	600.593	0.286552	0.0882274	3.24788	0.00116269	0.01996
AT1G29340	1171.18	0.287021	0.113485	2.52916	0.0114336	0.0872451
AT5G25540/AT5G11440	595.141	0.28778	0.112193	2.56505	0.0103162	0.0820464
AT1G03950	206.946	0.287884	0.102316	2.81369	0.00489766	0.0520342
AT3G57090	1837.08	0.287902	0.112968	2.54853	0.0108178	0.0844418
AT5G56150	127.612	0.288206	0.101405	2.84212	0.00448148	0.0488442
AT5G58320	271.188	0.288219	0.111201	2.59189	0.00954509	0.0787068
AT5G02800/AT4G13190	691.671	0.288456	0.100807	2.86147	0.00421684	0.0471829
AT1G20780	578.267	0.290315	0.0985991	2.9444	0.00323586	0.0396817
AT1G56423	240.563	0.290953	0.0962016	3.02441	0.00249116	0.0332165
AT5G20910	274.047	0.291489	0.0946555	3.07947	0.00207367	0.029624
AT5G05360	281.988	0.293091	0.10241	2.86195	0.00421047	0.047159
AT3G50500	1672.23	0.293413	0.105548	2.7799	0.0054376	0.0555305
AT3G44190	1161.84	0.293429	0.0879091	3.33786	0.000844251	0.0158104
AT1G51740	201.423	0.293558	0.0839551	3.49661	0.000471206	0.010483
AT5G13820	1067.37	0.294203	0.112682	2.61092	0.00903	0.0762501
AT1G04440	1665.1	0.294844	0.0835621	3.52845	0.000418008	0.00964808
AT5G06260/AT4G34070	699.192	0.29485	0.0983435	2.99817	0.00271609	0.0353226
AT1G75380	1770.36	0.295334	0.118664	2.48883	0.0128163	0.0937056
AT3G14050	1842.91	0.295769	0.0942794	3.13716	0.00170596	0.0258569
AT5G42250	783.839	0.295994	0.107586	2.75123	0.0059372	0.058409
AT5G01830	527.718	0.296027	0.114566	2.58389	0.00976934	0.0798063
AT3G46500	174.653	0.296238	0.104033	2.84755	0.00440576	0.0483944
AT3G28850	120.027	0.296377	0.106325	2.78745	0.00531246	0.0548373
AT4G27690	274.114	0.296535	0.119726	2.47679	0.0132571	0.0955228
AT1G78420	1168.99	0.296648	0.10335	2.87032	0.00410063	0.0465474
AT1G68000/AT4G38570	939.989	0.296879	0.111469	2.66335	0.00773679	0.0693022
AT1G75220	2343.83	0.296928	0.115599	2.5686	0.0102111	0.0814567
AT3G12350	262.005	0.297563	0.114499	2.59882	0.00935446	0.0778664
AT3G03330/AT3G03350	831.143	0.2989	0.116158	2.57322	0.0100758	0.0808362
AT3G50830	1222.82	0.299644	0.121678	2.46259	0.0137937	0.0973227
AT3G26990	293.167	0.29983	0.122286	2.45187	0.0142116	0.0989297
AT4G39270	336.436	0.300327	0.11156	2.69206	0.00710116	0.0652473
AT2G26660	168.137	0.300634	0.113351	2.65223	0.00799617	0.0706642
AT3G51840	1211.89	0.301392	0.0986882	3.05398	0.00225824	0.0311773
AT2G23450	524.522	0.301458	0.112686	2.6752	0.00746843	0.0676184
AT5G53330	455.125	0.301686	0.10586	2.84985	0.00437396	0.048188
AT4G08790	204.469	0.301768	0.121099	2.49191	0.0127057	0.0930749
AT1G11650	2623.23	0.302225	0.111039	2.72178	0.00649312	0.0616759
AT4G12000	95.2252	0.302233	0.105986	2.85164	0.00434947	0.0480014
AT5G19050	822.356	0.302297	0.105332	2.86996	0.00410524	0.0465747
AT3G18370	782.307	0.302358	0.113189	2.67128	0.00755632	0.0681201
AT1G30890	265.043	0.302681	0.0968265	3.12601	0.00177195	0.0265326
AT4G33740	698.129	0.302779	0.0962553	3.14558	0.00165756	0.0253606
AT1G75950	2832.16	0.302975	0.120517	2.51396	0.0119384	0.0895719
AT5G13810	779.091	0.302993	0.0957751	3.16358	0.0015584	0.0244107
AT3G24010	116.786	0.304478	0.12085	2.51947	0.0117533	0.0887491
AT3G15660	607.831	0.304595	0.0872405	3.49144	0.00048042	0.0106542
AT5G54850	141.396	0.304692	0.114205	2.66793	0.00763199	0.068626
AT5G22060	724.877	0.30484	0.096693	3.15266	0.00161791	0.0250265
AT3G20410	1063.47	0.304848	0.114219	2.66897	0.00760845	0.0684436
AT3G02540	741.045	0.305071	0.0926475	3.29282	0.000991884	0.0178551
AT5G22120	495.081	0.306754	0.103701	2.95806	0.00309585	0.0385026
AT2G36410	1696.67	0.30728	0.117751	2.60957	0.00906552	0.0764581
AT4G16580	204.03	0.308264	0.107048	2.87967	0.00398089	0.0456556
AT1G09270	214.544	0.309067	0.113424	2.72489	0.00643234	0.0613847
AT5G23340	373.634	0.30956	0.119933	2.58111	0.00984827	0.0801403
AT5G58340	1139.74	0.309815	0.0855554	3.62122	0.000293217	0.0073982
AT5G18980	370.341	0.310192	0.116701	2.65799	0.00786072	0.0700114
AT3G06170	833.406	0.310367	0.103905	2.98702	0.00281707	0.0360448
AT4G37880	388.184	0.311522	0.0871264	3.57552	0.000349532	0.00841594
AT2G33700	1134.62	0.313505	0.119995	2.61265	0.00898435	0.0759865
AT2G30490	21085.1	0.313557	0.104752	2.99331	0.00275965	0.0356153
AT3G12570	1534.02	0.313825	0.0953504	3.29128	0.000997323	0.0178974
AT3G05990	848.144	0.314478	0.104353	3.0136	0.00258166	0.0341096
AT5G66480	199.564	0.314987	0.124263	2.53484	0.0112499	0.086501
AT5G66200	969.464	0.315394	0.128211	2.45996	0.0138951	0.0976785
AT3G48530/AT3G48540	2884.32	0.315581	0.128684	2.45237	0.0141919	0.0988898
AT4G25650	533.01	0.316624	0.114759	2.75904	0.0057971	0.05761
AT5G18950	104.087	0.317779	0.10096	3.14758	0.00164625	0.0252877
AT1G55530	728.384	0.3183	0.117952	2.69856	0.00696411	0.0644532
AT2G32260	2058.6	0.31844	0.124826	2.55107	0.0107392	0.0840507
AT2G25010	320.246	0.318492	0.0923548	3.44857	0.000563567	0.0119449
AT3G51780	374.436	0.320089	0.103042	3.10639	0.00189384	0.0277671
AT1G03290	1354.1	0.320626	0.125965	2.54536	0.0109165	0.0849292
AT3G14090	1277.01	0.320695	0.116939	2.74242	0.00609884	0.0592942
AT2G12400	792.026	0.321463	0.120938	2.65808	0.00785868	0.0700114
AT3G22850	3336.92	0.321613	0.119929	2.68169	0.00732515	0.0667501
AT5G51700	214.549	0.321729	0.102038	3.15302	0.00161589	0.0250136
AT2G45980	462.95	0.322006	0.10481	3.07229	0.00212422	0.0299954
AT3G46690	229.264	0.322735	0.108718	2.96855	0.00299211	0.0375625
AT1G03350	826.011	0.323134	0.0995338	3.24648	0.00116843	0.0199971
AT4G14740	476.72	0.323444	0.116058	2.78691	0.00532128	0.0549015
AT3G54130	200.11	0.32419	0.125267	2.588	0.00965357	0.079106
AT5G02910/AT1G57690	202.968	0.32452	0.0943902	3.43807	0.000585878	0.0122749
AT4G19660	193.333	0.324821	0.120953	2.68551	0.00724183	0.0661052
AT3G46790	134.825	0.325037	0.109164	2.97751	0.00290602	0.0367712
AT4G11220	822.044	0.325195	0.124932	2.60298	0.00924183	0.077209
AT2G14850	169.851	0.32575	0.123976	2.62752	0.00860097	0.0737206
AT1G54060	266.585	0.325752	0.0901961	3.6116	0.000304316	0.00756945
AT5G66140	186.272	0.326252	0.104559	3.12026	0.00180689	0.0268649
AT1G76600	1220.49	0.326279	0.103248	3.16016	0.00157684	0.0245898
AT1G17780/AT2G16575	187.207	0.326331	0.127391	2.56164	0.0104179	0.0826058
AT4G00335	267.054	0.327086	0.128145	2.55246	0.0106965	0.0839121
AT5G44340	262.703	0.327428	0.107772	3.03816	0.00238025	0.0322283
AT5G05700	219.536	0.328226	0.123324	2.66151	0.00777919	0.0696149
AT5G18640	855.721	0.329102	0.11897	2.76627	0.00567016	0.0570005
AT5G51570	909.911	0.329251	0.125026	2.63346	0.0084521	0.0729491
AT2G17220	497.587	0.329278	0.0931023	3.53673	0.000405112	0.0094622
AT2G06530	1293.89	0.329439	0.115814	2.84454	0.00444754	0.0486
AT5G50850	536.125	0.330535	0.112335	2.9424	0.0032568	0.0398359
AT2G21940	871.886	0.331249	0.123978	2.67184	0.00754363	0.0680465
AT1G70160	1056.62	0.331588	0.114063	2.90708	0.00364825	0.0429393
AT3G05500	822.407	0.332775	0.119291	2.78961	0.00527714	0.0545529
AT5G12200	789.329	0.332984	0.135231	2.46233	0.0138038	0.0973387
AT1G50740	213.785	0.333501	0.132875	2.50989	0.0120769	0.0901616
AT5G10870/AT5G10860	3047.67	0.333568	0.117067	2.84939	0.00438038	0.0481918
AT3G15820	359.317	0.334138	0.1263	2.6456	0.00815466	0.0714327
AT5G55860	1087.97	0.334169	0.133638	2.50055	0.0124	0.0916172
AT1G30270	1530.21	0.334408	0.0960981	3.47986	0.000501685	0.0109569
AT1G10410	390.837	0.33464	0.115445	2.8987	0.00374711	0.0437848
AT3G55730	131.733	0.334917	0.124944	2.68053	0.00735059	0.0669246
AT3G05330	2270.6	0.335835	0.107328	3.12905	0.00175374	0.0263349
AT1G17280	1826.36	0.336093	0.127311	2.63994	0.00829216	0.0721302
AT2G44080	1087.34	0.336117	0.133654	2.51483	0.0119089	0.0894465
AT1G80610	254.573	0.336439	0.124213	2.70856	0.00675762	0.0632472
AT1G15530	724.604	0.336908	0.119589	2.81722	0.00484421	0.0515964
AT1G78310	303.14	0.337933	0.134996	2.50328	0.0123047	0.0912021
AT1G58030	2414.86	0.338672	0.123929	2.7328	0.00627988	0.060579
AT5G63620	1206.74	0.338971	0.112731	3.00691	0.0026392	0.0347083
AT3G01400	379.581	0.339707	0.126061	2.69478	0.00704343	0.0649129
AT3G61070	627.226	0.339829	0.10854	3.13092	0.0017426	0.0261863
AT1G29970	740.364	0.340233	0.130622	2.60471	0.0091952	0.0770277
AT3G60450/AT3G60420	927.458	0.340334	0.117433	2.89811	0.00375422	0.0438317
AT5G46860	487.71	0.341234	0.110914	3.07657	0.00209399	0.0297079
AT3G15070	840.222	0.341354	0.111387	3.06457	0.00217986	0.0304157
AT1G64610	340.05	0.342204	0.13012	2.62991	0.00854086	0.0734145
AT3G58970/AT4G28580	747.124	0.342258	0.121445	2.81821	0.00482925	0.0514632
AT2G30100	558.598	0.342724	0.121529	2.82009	0.00480097	0.0512655
AT4G05060	180.265	0.343402	0.134541	2.55241	0.0106981	0.0839121
AT5G10740	560.889	0.343563	0.123332	2.78567	0.00534171	0.0549628
AT5G62630	2742.56	0.344076	0.102676	3.35107	0.000804994	0.0154319
AT4G38810	2183.64	0.344154	0.133824	2.57169	0.0101203	0.0810394
AT2G37110	3243.31	0.347518	0.12911	2.69165	0.00711005	0.0652473
AT3G61790	490.694	0.348613	0.126164	2.76317	0.00572423	0.0573653
AT3G13235	798.794	0.348732	0.0946416	3.68476	0.000228915	0.00612987
AT2G44350/AT2G11270	2375.58	0.348843	0.142563	2.44693	0.0144077	0.0998494
AT1G07230	1384.88	0.348882	0.141532	2.46504	0.0136999	0.0969535
AT4G25970	585.686	0.348904	0.100712	3.46438	0.000531464	0.0114393
AT5G58540	177.59	0.349068	0.138256	2.52479	0.0115767	0.0878721
AT4G27350	144.961	0.349745	0.13866	2.52232	0.0116585	0.0883529
AT4G34390	862.591	0.350449	0.136845	2.56092	0.0104396	0.0827467
AT1G26670	610.876	0.350743	0.120551	2.90949	0.00362018	0.0426805
AT4G10360	245.215	0.351114	0.117921	2.97755	0.00290565	0.0367712
AT3G54840	728.175	0.351171	0.110498	3.17809	0.00148249	0.0235729
AT3G15040	200.702	0.351731	0.0941681	3.73514	0.000187612	0.00529131
AT2G06025	299.262	0.351785	0.138665	2.53694	0.0111826	0.0861393
AT1G24440	227.177	0.35237	0.114896	3.06685	0.00216326	0.0302944
AT5G04470	271.791	0.353369	0.135839	2.60138	0.00928497	0.0774875
AT1G04960	603.104	0.35387	0.141764	2.49619	0.0125537	0.0924768
AT2G39570	905.345	0.354123	0.113651	3.11588	0.00183399	0.0271719
AT3G52930	12319	0.354772	0.120893	2.9346	0.00333974	0.0405076
AT5G55560	409.942	0.354993	0.1321	2.68729	0.00720336	0.0659254
AT1G02860	1225.05	0.355248	0.13514	2.62873	0.00857044	0.0735787
AT3G58600	613.799	0.355504	0.134645	2.64031	0.00828304	0.0720839
AT5G05460	1068.7	0.355697	0.116527	3.05249	0.00226954	0.0312924
AT3G58680	1768.38	0.356219	0.12867	2.76848	0.00563192	0.0567719
AT3G05320	132.478	0.356301	0.123309	2.8895	0.00385855	0.0446659
AT1G26690	528.47	0.35636	0.128627	2.77048	0.00559736	0.0565317
AT3G08710	401.043	0.356428	0.129656	2.74903	0.00597715	0.0585431
AT3G26600	252.878	0.356448	0.124302	2.8676	0.00413604	0.0467969
AT4G17230	999.992	0.357618	0.138156	2.58851	0.00963912	0.0790798
AT1G14000	1321.98	0.358563	0.119845	2.99188	0.00277265	0.0357055
AT2G32920	479.057	0.359256	0.14196	2.53068	0.0113842	0.0870942
AT5G02620	797.362	0.360074	0.131825	2.73144	0.00630575	0.0607728
AT5G39510	1288.04	0.360436	0.107964	3.33849	0.000842349	0.0158104
AT5G04720	993.806	0.36101	0.126097	2.86295	0.0041971	0.0471095
AT1G20693	3851.68	0.36142	0.139382	2.59302	0.00951368	0.0785708
AT1G74360	500.845	0.362133	0.147292	2.45862	0.0139473	0.0978748
AT3G61200	307.187	0.363345	0.128181	2.83463	0.00458792	0.0496448
AT3G51130	1187.02	0.364321	0.118238	3.08126	0.00206128	0.0295423
AT2G42690/AT2G42680	1645.87	0.364395	0.131371	2.77378	0.00554087	0.0562578
AT4G24690	7038.36	0.364693	0.139305	2.61794	0.00884616	0.0752898
AT2G33845	577.774	0.364717	0.115494	3.15789	0.00158915	0.0247452
AT5G57685	811.145	0.365303	0.135374	2.69846	0.00696602	0.0644532
AT1G75850	411.675	0.365305	0.10481	3.48539	0.00049142	0.0108136
AT2G07690	503.381	0.365501	0.106011	3.44778	0.000565219	0.0119679
AT4G23450	234.197	0.365665	0.0877087	4.16909	3.05822e-05	0.00137672
AT5G06560	681.694	0.365698	0.117411	3.11467	0.00184151	0.0272641
AT4G05160	775.751	0.365729	0.12245	2.98676	0.00281953	0.0360448
AT5G62560	1179.82	0.365778	0.147705	2.47641	0.0132711	0.0955228
AT5G45130	814.367	0.36675	0.133565	2.74585	0.00603538	0.0588946
AT3G32980	44970.5	0.367093	0.115363	3.18208	0.00146224	0.0234026
AT3G18770	196.072	0.367493	0.147246	2.49578	0.0125682	0.0924768
AT1G06840	2562.61	0.367974	0.145321	2.53214	0.0113368	0.0869157
AT2G25940	327.255	0.369153	0.118199	3.12314	0.00178933	0.026717
AT4G31170	1303.45	0.369909	0.133174	2.77764	0.00547559	0.0557832
AT4G10390	78.6662	0.371431	0.130787	2.83996	0.00451198	0.049014
AT5G58620	1378.64	0.372993	0.140358	2.65743	0.00787388	0.070024
AT1G24430	54.5771	0.373116	0.135677	2.75003	0.00595892	0.058419
AT3G50940	45.4089	0.374021	0.149123	2.50814	0.0121368	0.0904484
AT5G59420	1985.29	0.37462	0.123357	3.03686	0.00239053	0.0323259
AT4G33700	1386.62	0.374691	0.133215	2.81267	0.00491317	0.052094
AT3G09830	1458.95	0.37487	0.130306	2.87685	0.00401664	0.0459157
AT5G60100	290.609	0.375513	0.1522	2.46724	0.013616	0.0966056
AT1G74740	458.399	0.375824	0.15356	2.44741	0.0143888	0.099784
AT1G47310	278.185	0.376776	0.112858	3.3385	0.000842319	0.0158104
AT5G07100	447.841	0.377722	0.137468	2.74771	0.00600137	0.0586714
AT1G22330	257.68	0.378409	0.136168	2.77899	0.0054528	0.0556318
AT1G49850	365.832	0.378703	0.148263	2.55427	0.0106412	0.0836524
AT3G04010	126.135	0.378874	0.126086	3.00488	0.0026569	0.0348323
AT3G12630	2639.28	0.379222	0.150518	2.51945	0.0117537	0.0887491
AT1G29690	495.188	0.379696	0.126706	2.99667	0.00272946	0.0353872
AT4G35540	109.723	0.380282	0.120774	3.14872	0.00163987	0.025218
AT2G28890	3320.97	0.380354	0.151608	2.5088	0.0121143	0.0903767
AT3G53120	754.28	0.381595	0.103267	3.69523	0.000219688	0.00592624
AT1G05760	126.396	0.382529	0.153291	2.49544	0.0125801	0.0924768
AT5G47960	167.769	0.382743	0.141284	2.70903	0.00674811	0.0632144
AT1G22540	574.174	0.383779	0.125701	3.0531	0.00226489	0.0312487
AT1G21780	797.874	0.385657	0.140392	2.747	0.00601424	0.0587155
AT5G24590	2489.36	0.386822	0.132407	2.92146	0.00348401	0.0416342
AT3G14260	244.589	0.387002	0.141213	2.74056	0.00613355	0.0595217
AT1G22280	1096.94	0.387558	0.128967	3.00511	0.00265486	0.0348272
AT1G21450	2717.03	0.3882	0.141819	2.7373	0.00619459	0.0599484
AT1G49050	939.892	0.389558	0.136043	2.86349	0.00419005	0.0470756
AT5G18680	927.777	0.389812	0.128937	3.02328	0.0025005	0.0332789
AT1G20640	1453.82	0.390653	0.14541	2.68657	0.00721907	0.0660119
AT1G71710	143.192	0.390798	0.158069	2.47232	0.013424	0.0960238
AT4G02730	197.408	0.39118	0.143168	2.73231	0.00628925	0.0606416
AT3G22942	80.6445	0.391724	0.150234	2.60743	0.00912242	0.0767634
AT1G17080	1103.6	0.39173	0.141299	2.77235	0.00556526	0.0564239
AT4G00550	444.218	0.39225	0.128214	3.05935	0.0022182	0.0307859
AT4G05210	62.5409	0.393645	0.152956	2.57358	0.0100651	0.0807817
AT1G24150	398.075	0.394755	0.152599	2.58689	0.00968478	0.0793247
AT4G05000	265.543	0.39611	0.130168	3.04307	0.0023418	0.0318715
AT1G06310	310.974	0.39663	0.143805	2.75812	0.00581352	0.0576915
AT5G25770	717.582	0.397564	0.147705	2.69162	0.00711068	0.0652473
AT5G63990	496.362	0.398061	0.161888	2.45886	0.013938	0.0978561
AT1G42990	1790.44	0.398674	0.16196	2.46156	0.0138334	0.0974399
AT3G55880	271.825	0.39872	0.139377	2.86072	0.00422678	0.0471829
AT5G54930	117.146	0.399046	0.149012	2.67794	0.00740766	0.0673003
AT1G25682	531.271	0.399141	0.125283	3.18593	0.0014429	0.0232764
AT1G44170	1121.55	0.399581	0.13055	3.06076	0.00220775	0.0307016
AT5G64780	185.684	0.400561	0.132686	3.01886	0.00253728	0.0336621
AT4G17170/AT4G17160	1051.2	0.40108	0.122304	3.27936	0.00104041	0.0184083
AT5G57630/AT5G57565	504.401	0.401979	0.158895	2.52985	0.0114113	0.0871693
AT5G56000	474.18	0.40221	0.147299	2.73057	0.00632258	0.0608504
AT4G35760/AT4G35750	2024.43	0.404213	0.114868	3.51892	0.0004333	0.00992257
AT5G61560	790.465	0.404444	0.154045	2.62549	0.00865252	0.074042
AT4G25030	1401.87	0.40522	0.0676919	5.98624	2.14747e-09	1.13107e-06
AT4G08230	417.145	0.405917	0.144288	2.81323	0.00490465	0.0520485
AT5G01610	369.575	0.406511	0.15277	2.66094	0.00779224	0.0696508
AT4G25800	97.7104	0.40752	0.148258	2.74873	0.00598269	0.0585431
AT5G05850	66.4837	0.408102	0.147233	2.77181	0.00557448	0.0564579
AT2G44360	576.818	0.408944	0.14815	2.76034	0.00577408	0.0575788
AT1G28380	1619.57	0.4094	0.160879	2.54478	0.0109347	0.0850078
AT3G23280	1225.96	0.409432	0.16106	2.54211	0.0110185	0.0853131
AT5G18490	1191.44	0.410442	0.164385	2.49683	0.012531	0.0924055
AT1G72175	376.471	0.410503	0.126898	3.2349	0.00121684	0.02046
AT5G58230	193.076	0.411533	0.111687	3.68469	0.000228983	0.00612987
AT3G10500	2590	0.411673	0.132242	3.11302	0.00185185	0.0273404
AT5G65900	99.646	0.412564	0.13164	3.13404	0.00172419	0.0259941
AT1G26440	313.816	0.41263	0.141074	2.92492	0.00344549	0.0413002
AT1G62300	2117.34	0.412875	0.164785	2.50554	0.0122266	0.0909247
AT3G03610/AT1G67400	472.419	0.414351	0.158443	2.61514	0.00891914	0.0756871
AT3G56440	98.7443	0.414729	0.145603	2.84836	0.00439454	0.0482963
AT2G02710	385.963	0.414941	0.0959102	4.32635	1.51601e-05	0.000823177
AT4G03030	447.893	0.415149	0.134347	3.09012	0.00200072	0.0289535
AT3G54000	413.945	0.415562	0.155957	2.6646	0.00770798	0.0691275
AT2G40095	99.6317	0.415571	0.135385	3.06955	0.00214379	0.0301504
AT4G21215	137.472	0.415897	0.16826	2.47175	0.0134452	0.0960468
AT1G08830	6108.59	0.415959	0.138791	2.99702	0.00272629	0.0353872
AT3G14900	52.9298	0.416858	0.151021	2.76027	0.00577542	0.0575788
AT1G02500	295.79	0.41709	0.123609	3.37426	0.000740136	0.0145595
AT4G12070	899.211	0.417536	0.140946	2.96237	0.00305277	0.0380792
AT2G04550	618.735	0.418057	0.147941	2.82584	0.00471568	0.050534
AT1G67730	1816.71	0.418472	0.120078	3.485	0.000492144	0.0108136
AT4G35600	278.882	0.419999	0.154296	2.72203	0.00648822	0.0616759
AT5G61820	1143.83	0.420309	0.167979	2.50215	0.0123442	0.0914119
AT4G24160	480.35	0.420816	0.154128	2.73031	0.00632753	0.0608504
AT3G52880	2526.77	0.421508	0.0849816	4.95999	7.04952e-07	8.39092e-05
AT1G12440	640.138	0.421512	0.154767	2.72353	0.00645885	0.0615168
AT5G07150	1078.31	0.421918	0.132153	3.19264	0.00140977	0.0228821
AT4G29420	62.6898	0.423075	0.164317	2.57475	0.0100313	0.0806852
AT1G01440	442.065	0.423246	0.143671	2.94594	0.00321977	0.0395765
AT1G69840	1834.21	0.424212	0.162764	2.60631	0.00915239	0.0768218
AT2G44790	10127.4	0.425581	0.124971	3.40545	0.00066056	0.0133814
AT5G58430	1644.92	0.425673	0.13821	3.07991	0.00207065	0.029624
AT5G62740	581.159	0.426934	0.143508	2.97499	0.00292994	0.036985
AT4G04960	272.395	0.427893	0.114457	3.73847	0.000185143	0.00526396
AT2G26920	546.611	0.428073	0.119936	3.56917	0.00035812	0.00857371
AT5G18900	186.87	0.428605	0.162099	2.6441	0.00819079	0.0716329
AT5G05190	233.716	0.42871	0.165088	2.59685	0.00940818	0.0781899
AT4G34150	998.739	0.428769	0.174878	2.45181	0.0142139	0.0989297
AT5G58940	573.33	0.429942	0.124283	3.45938	0.00054142	0.0115803
AT2G42510	62.2972	0.43036	0.175579	2.45109	0.0142424	0.0990617
AT1G73030	2667.58	0.430963	0.142258	3.02945	0.00244996	0.0328973
AT5G61210/AT1G13890	1768.84	0.431031	0.134818	3.19714	0.00138797	0.022633
AT4G26060	551.6	0.431062	0.149664	2.88019	0.00397431	0.0456547
AT1G67800	189.989	0.433127	0.14472	2.99285	0.00276381	0.0356153
AT5G15120	2614.57	0.434807	0.143247	3.03538	0.00240237	0.0324651
AT4G18950	652.82	0.435534	0.135622	3.21139	0.00132096	0.0217932
AT5G50200	5367.47	0.436548	0.167459	2.6069	0.00913671	0.0767634
AT4G09560	164.15	0.437193	0.152153	2.87337	0.00406119	0.0462493
AT2G30400	121.736	0.437935	0.160867	2.72234	0.00648217	0.0616552
AT5G45800	728.469	0.438415	0.111878	3.91868	8.90341e-05	0.00302544
AT1G77405	29.2248	0.438906	0.178405	2.46017	0.013887	0.0976541
AT3G13430	338.658	0.439859	0.122766	3.58289	0.000339814	0.00827653
AT5G12890	563.718	0.440537	0.132401	3.32729	0.000876944	0.0162208
AT3G53490	206.167	0.440898	0.170714	2.58268	0.00980376	0.0800254
AT3G58710	407.935	0.443633	0.170262	2.60559	0.0091715	0.0769208
AT3G45640	1032.36	0.443892	0.171163	2.59339	0.00950348	0.0785466
AT2G44500	709.55	0.444246	0.167561	2.65125	0.00801954	0.0707585
AT2G39110	377.567	0.444461	0.16627	2.67312	0.00751484	0.0679205
AT1G07040	2298.59	0.445258	0.166017	2.68201	0.00731819	0.0667155
AT5G28650	2216.32	0.445265	0.150937	2.95	0.00317769	0.0392655
AT4G35480	186.933	0.445488	0.156298	2.85025	0.00436853	0.0481865
AT3G20170	130.553	0.445676	0.162023	2.7507	0.00594682	0.058409
AT1G18860	644.744	0.446362	0.176391	2.53053	0.0113891	0.0870943
AT3G18560	519.968	0.44682	0.154473	2.89254	0.00382136	0.0443328
AT4G21390	621.669	0.447968	0.153305	2.92207	0.00347715	0.0415758
AT5G53110	398.405	0.448128	0.161558	2.77379	0.00554068	0.0562578
AT4G21980	420.528	0.448185	0.131669	3.40389	0.000664345	0.0134194
AT4G17800	1029.52	0.450824	0.0973433	4.63128	3.63413e-06	0.000282517
AT3G09032	46.2257	0.450946	0.160464	2.81027	0.00495003	0.0523295
AT1G56260	43.8569	0.453404	0.178323	2.5426	0.0110031	0.0852885
AT2G33360	730.728	0.453623	0.137603	3.29662	0.00097857	0.0176966
AT5G67520	63.2591	0.45552	0.156684	2.90725	0.00364623	0.0429393
AT2G16980	218.437	0.455704	0.15346	2.96953	0.00298257	0.0375487
AT4G12400	228.148	0.456122	0.177356	2.57179	0.0101174	0.0810394
AT2G39550	470.755	0.457091	0.138879	3.29129	0.000997296	0.0178974
AT2G41540	281.176	0.459939	0.10425	4.41187	1.02483e-05	0.000609916
AT1G12760	1439.27	0.460289	0.13629	3.37728	0.000732057	0.0144254
AT3G15630	301.925	0.460458	0.164374	2.80128	0.00509011	0.0532201
AT5G58020	1145.91	0.46135	0.16072	2.87053	0.00409791	0.0465416
AT1G15430/AT2G26050	258.249	0.462712	0.161581	2.86366	0.00418777	0.0470756
AT2G04305	238.221	0.463939	0.137135	3.38309	0.000716753	0.0142324
AT5G07910	340.909	0.464539	0.142232	3.26606	0.00109055	0.019067
AT5G55970	347.749	0.464818	0.148247	3.13543	0.00171603	0.0259164
AT1G53035	225.137	0.464868	0.160659	2.8935	0.00380969	0.0442706
AT4G04040	351.273	0.465354	0.151481	3.07204	0.00212601	0.0300006
AT4G33565	1087.93	0.466019	0.184581	2.52474	0.0115784	0.0878721
AT1G27290	282.091	0.46635	0.122875	3.79531	0.000147461	0.00447653
AT3G25970	23.9222	0.468144	0.188328	2.4858	0.0129262	0.0941757
AT3G57870	907.785	0.468889	0.163149	2.87399	0.00405318	0.0462081
AT1G56010	916.932	0.469638	0.147571	3.18245	0.00146035	0.0233983
AT2G15695	1335.6	0.469698	0.165037	2.84601	0.00442708	0.0485444
AT1G34750	1447.67	0.470287	0.140904	3.33765	0.000844898	0.0158104
AT1G21680	2207.18	0.470348	0.172414	2.72801	0.0063717	0.0610454
AT1G66880	772.118	0.470933	0.173883	2.70833	0.00676236	0.0632635
AT4G10270	636.07	0.47105	0.145923	3.22806	0.00124632	0.020889
AT1G21670	160.605	0.472416	0.164935	2.86426	0.00417989	0.0470668
AT1G04770	1185.62	0.472749	0.165095	2.86349	0.00418997	0.0470756
AT3G08760	900.342	0.473376	0.137984	3.43065	0.000602142	0.0125496
AT3G51730	1715.47	0.473602	0.140133	3.37967	0.000725722	0.0143698
AT1G07250	146.109	0.474627	0.191928	2.47295	0.0134005	0.0960238
AT1G66580/AT1G69750	1362.46	0.474634	0.157868	3.00652	0.00264257	0.0347217
AT3G54300	1065.38	0.475356	0.146718	3.23993	0.00119557	0.0202872
AT3G17410	2956.41	0.475449	0.154602	3.07531	0.00210284	0.0298134
AT5G50900	852.64	0.476148	0.136367	3.49166	0.000480034	0.0106542
AT1G02380	59.9324	0.477236	0.194296	2.45624	0.0140401	0.0982288
AT5G52070	214.266	0.478042	0.13799	3.46432	0.000531568	0.0114393
AT5G43190	217.553	0.478341	0.142781	3.35017	0.000807607	0.0154531
AT1G70530	1179.15	0.478447	0.156608	3.05507	0.00225007	0.0311258
AT4G17670	251.771	0.480253	0.183852	2.61217	0.00899692	0.0760622
AT2G26400	2716.16	0.482921	0.1509	3.20028	0.00137293	0.0224747
AT3G52710	530.606	0.483663	0.168606	2.86861	0.00412282	0.0466736
AT2G24550	1330.29	0.483743	0.164527	2.94019	0.00328006	0.039991
AT4G39890	243.631	0.485192	0.153165	3.16778	0.00153606	0.024205
AT1G16670	637.515	0.485601	0.14994	3.23862	0.00120107	0.0203247
AT1G60140	2863.44	0.486735	0.142372	3.41876	0.000629073	0.0128862
AT3G57120	190.658	0.488554	0.158634	3.07976	0.00207168	0.029624
AT5G21274	4619.14	0.489274	0.133562	3.66327	0.000249012	0.00654139
AT5G37070	601.202	0.489637	0.142603	3.43358	0.000595676	0.0124501
AT4G33940	414.18	0.490939	0.173678	2.82672	0.00470274	0.0505078
AT1G23870	4255.68	0.492003	0.146684	3.35416	0.000796068	0.0153445
AT3G27210	694.751	0.492273	0.143679	3.4262	0.000612091	0.0126924
AT3G50950	1623.77	0.492651	0.181307	2.71722	0.00658332	0.0621961
AT4G18520	45.2906	0.492881	0.172491	2.85743	0.00427084	0.0475624
AT2G02360	113.744	0.493204	0.14764	3.34058	0.000836033	0.0157686
AT1G05060	394.858	0.493336	0.187568	2.63017	0.00853421	0.0733872
AT5G65020	7009.26	0.493656	0.175132	2.81877	0.0048208	0.0514141
AT5G35735	2777.3	0.494165	0.171081	2.88848	0.00387103	0.0447857
AT5G60270	60.6077	0.494776	0.179162	2.76161	0.00575167	0.0575318
AT4G33920	1221.05	0.494838	0.175029	2.82718	0.00469598	0.0505078
AT4G15563	235.259	0.495237	0.160307	3.08931	0.00200624	0.02899
AT2G19760	1618.24	0.495882	0.198058	2.50372	0.0122895	0.0911672
AT1G32690	44.1568	0.496966	0.143231	3.46968	0.000521077	0.0113176
AT1G80460	827.071	0.497125	0.115203	4.31522	1.59447e-05	0.000856947
AT3G58570	72.046	0.497332	0.15094	3.29491	0.000984542	0.0177588
AT1G08050	1440.62	0.498937	0.17082	2.92084	0.00349094	0.0416698
AT1G12520	2066.78	0.499365	0.145879	3.42314	0.000619031	0.0127406

## Sheet: Tab. S3b
Table S3b: differentially expressed genes (DEGs) detected as upregulated under Cd stress responses in A. halleri root
	baseMean	log2FoldChange	lfcSE	stat	pvalue	padj
AAZ20449	269.719	10.6243	1.94403	5.46509	4.62663e-08	8.94255e-06
AAZ20451	106.655	9.76684	1.92267	5.07984	3.77762e-07	5.20175e-05
KDR06531	76.0913	9.27977	2.03907	4.55099	5.33946e-06	0.000372489
XP_001943898	72.1655	9.20339	2.0874	4.40902	1.03838e-05	0.000616239
NP_001156203	71.9645	9.19925	1.88662	4.87605	1.08229e-06	0.00011381
DAA06114	68.5118	9.1282	1.80874	5.04672	4.49452e-07	5.91815e-05
XP_009311700	116.79	8.93508	1.50009	5.95635	2.57939e-09	1.15622e-06
WP_035347457	378.982	8.7321	1.38773	6.29234	3.12708e-10	2.74506e-07
XP_015677161	179.968	8.66217	1.41738	6.1114	9.87606e-10	6.34564e-07
XP_015375989	46.0465	8.55493	1.96776	4.34755	1.37669e-05	0.000755646
NP_001119658	45.7629	8.54604	1.77559	4.81306	1.48635e-06	0.000144974
XP_015368770	42.9287	8.45388	1.89133	4.4698	7.82918e-06	0.000496823
XP_008181834	40.8298	8.38149	1.79276	4.67518	2.93696e-06	0.000245539
AT2G05580	39.156	8.32103	1.934	4.30251	1.68877e-05	0.000896195
XP_015372524	35.5504	8.18164	1.77678	4.60475	4.12954e-06	0.000311832
XP_015369814	34.6943	8.14645	1.73349	4.69946	2.60853e-06	0.000221599
NP_001127761	34.3751	8.1332	1.93913	4.19425	2.7378e-05	0.00126761
NP_001156072	45.3436	8.05095	1.80816	4.45256	8.48536e-06	0.000522718
XP_003246490	30.5231	7.96158	1.66603	4.77877	1.76371e-06	0.000162261
XP_001951787	30.2473	7.94905	1.8544	4.28659	1.81434e-05	0.000943814
XP_001945527	29.9402	7.93381	1.77456	4.47085	7.79102e-06	0.000495895
WP_039163635	431.328	7.91868	1.15093	6.88023	5.97557e-12	1.79847e-08
NP_001156206	29.5244	7.91359	1.70016	4.65462	3.2458e-06	0.000263009
AGT98614	26.672	7.76703	1.71609	4.526	6.0111e-06	0.000407209
XP_001948464	25.1329	7.68123	1.67036	4.59855	4.25435e-06	0.000316632
XP_014147498	107.786	7.59802	1.3055	5.82002	5.8839e-09	2.01626e-06
NP_001156143	23.1089	7.56012	1.91314	3.95169	7.76004e-05	0.00272936
NP_001155777	23.094	7.55905	1.54504	4.89248	9.95753e-07	0.000108528
XP_001703420	22.8174	7.5419	1.99499	3.78043	0.00015656	0.00466536
XP_015366550	22.2802	7.50722	1.55315	4.83355	1.34117e-06	0.000134551
NP_001129593	31.1162	7.50675	1.67798	4.47369	7.6883e-06	0.000491509
XP_015374517	22.1359	7.49782	1.54952	4.83879	1.30635e-06	0.000132318
BAJ89401	21.6672	7.46701	1.57261	4.74817	2.05268e-06	0.000183246
NP_001119668	20.3469	7.37624	1.53969	4.79075	1.66161e-06	0.00015628
XP_008179625	27.1814	7.31142	1.64931	4.43301	9.29283e-06	0.000565842
NP_001119693	18.7944	7.26183	1.57967	4.59707	4.28482e-06	0.000316746
NP_001156256	18.4645	7.23614	1.55036	4.66739	3.05045e-06	0.000251043
XP_015369762	18.3424	7.22664	1.58616	4.55606	5.21214e-06	0.000367583
AT5G65430	18.2217	7.21718	1.86513	3.86953	0.000109044	0.00355077
BAH72914	17.8463	7.187	1.58911	4.52265	6.10705e-06	0.000409756
XP_015376768	17.5697	7.16431	1.51131	4.74047	2.13218e-06	0.000189539
NP_001119699	17.4108	7.15142	1.62483	4.40134	1.07583e-05	0.000632551
NP_001119630	17.3752	7.14825	1.5564	4.59281	4.37323e-06	0.000322151
F2DYI8	32.6691	7.09411	1.28885	5.50421	3.70835e-08	7.5852e-06
XP_015368215	13.4036	6.77388	1.71173	3.95733	7.57927e-05	0.00268822
XM_002894544	13.1586	6.74705	1.65693	4.07202	4.66077e-05	0.00189099
BAJ91267	12.3766	6.65859	1.73748	3.83231	0.000126943	0.00400365
XP_001951488	16.0307	6.54897	1.64091	3.99105	6.57811e-05	0.00241442
AAT07452	31.0104	6.53273	1.30658	4.99988	5.7365e-07	7.19384e-05
NP_199147	10.973	6.48477	1.63408	3.96845	7.23426e-05	0.00259644
NP_850500	10.9215	6.47784	1.61587	4.00888	6.10076e-05	0.0022911
XP_009406110	39.2905	6.45923	1.20799	5.34707	8.93917e-08	1.59602e-05
M1AXI1	19.6969	6.36166	1.31322	4.84433	1.27043e-06	0.000129301
AT5G13440	9.98454	6.34864	1.69815	3.73856	0.00018508	0.00526396
D8RBN6	26.9345	6.33424	1.29724	4.88286	1.04558e-06	0.000111254
XP_002872215	9.69613	6.30735	1.67187	3.77263	0.000161535	0.00475976
XP_004239323	25.7667	6.2631	1.29926	4.82051	1.43191e-06	0.000140314
XM_002868448	13.1669	6.26176	1.23938	5.05233	4.36464e-07	5.78329e-05
AT1G23410/AT1G53930	12.9063	6.234	1.47179	4.23567	2.27873e-05	0.00111364
P37833	8.92454	6.18608	1.43634	4.30684	1.65607e-05	0.000881061
CAA07015	8.79772	6.16734	1.68696	3.65589	0.000256289	0.00667427
W5HH23	17.1066	6.15704	1.28039	4.8087	1.51912e-06	0.000147488
XP_002465508	7.67668	5.97026	1.84196	3.24125	0.00119005	0.0202242
AT1G13430/AT2G14920	7.68928	5.96779	1.13106	5.27631	1.31814e-07	2.23957e-05
XP_002883243	20.963	5.96673	1.26861	4.70334	2.55934e-06	0.0002183
BAJ92973	7.6443	5.963	1.72833	3.45016	0.000560256	0.0119107
M4CB91	7.41779	5.91713	1.17625	5.03051	4.89177e-07	6.28413e-05
GAQ84171	14.099	5.8763	1.26467	4.6465	3.37618e-06	0.000270442
DAA36079	6.79615	5.79199	1.38328	4.18715	2.82485e-05	0.00128067
C1EGX1	24.1341	5.75701	1.2372	4.65324	3.26753e-06	0.000263756
XP_003078402	23.9892	5.74543	1.26536	4.54056	5.6104e-06	0.000388815
NP_850234	6.56254	5.74378	1.73476	3.311	0.000929637	0.0169719
XP_002884367	95.2198	5.73524	1.09517	5.23684	1.63345e-07	2.63751e-05
I1MB71	65.0836	5.73193	1.1528	4.9722	6.61988e-07	8.10418e-05
A0A059C4I1	6.34748	5.69329	1.37492	4.14083	3.46058e-05	0.00150635
NP_189364	6.25472	5.67296	1.58933	3.5694	0.000357794	0.00857371
XP_002882756	22.2289	5.6318	1.27016	4.43392	9.25333e-06	0.00056507
BAH72309	8.47825	5.62399	1.47228	3.81992	0.000133497	0.00411789
NP_001190249	6.02167	5.61822	1.68582	3.33263	0.000860278	0.0159686
NP_172669	43.4299	5.60355	1.11239	5.03739	4.71929e-07	6.09975e-05
A8ICW2	62.1194	5.53064	1.11764	4.94852	7.47797e-07	8.85089e-05
UPI00051CA35C	5.59008	5.50935	1.36798	4.02736	5.6406e-05	0.00217251
XP_004147624	5.39682	5.45885	1.56008	3.49909	0.000466845	0.010419
XP_002884623	5.23214	5.41424	1.54267	3.50966	0.000448674	0.0101386
XP_004291564	7.15151	5.37631	1.22163	4.40093	1.07787e-05	0.000632551
B8LKB9	18.61	5.37181	1.24971	4.29845	1.71994e-05	0.000910445
A0A061R6T6	13.8983	5.36849	1.23336	4.35275	1.34441e-05	0.00074574
XP_001756473	5.0457	5.36251	1.56569	3.42502	0.000614763	0.0127042
EFN50572	5.0304	5.3582	1.68368	3.18243	0.00146045	0.0233983
XP_002871919	4.99735	5.34846	1.6288	3.28368	0.0010246	0.0182625
AT3G49830	4.87199	5.31337	1.51488	3.50745	0.000452425	0.0101851
AT1G49860	39.1319	5.28207	1.28407	4.11355	3.89626e-05	0.00164502
S8C2F8	4.72274	5.26572	1.37252	3.83654	0.000124779	0.00396749
XP_002503130	129.002	5.26242	1.01221	5.19896	2.00412e-07	3.07421e-05
XP_002878985	4.66415	5.24924	1.65098	3.17946	0.00147548	0.0235078
AT3G15980	4.66675	5.24826	1.26021	4.16459	3.11908e-05	0.00138938
A0A061RGG1	38.4009	5.24777	1.03301	5.08008	3.77275e-07	5.20175e-05
XP_002959384	6.49913	5.23672	1.29057	4.05767	4.95644e-05	0.00196373
BAB09205	4.61041	5.23142	1.50561	3.47462	0.000511578	0.0111227
A0A078HVP6	4.58336	5.22314	1.36867	3.8162	0.00013552	0.00416201
W9RT64	29.2945	5.22101	1.08928	4.7931	1.64223e-06	0.000156256
AT5G40650/AT5G65165	4.55479	5.2149	1.67895	3.10604	0.00189608	0.0277671
BAJ87032	4.54462	5.21123	1.56194	3.33638	0.000848775	0.0158248
K4C9C7	6.28252	5.18967	1.44823	3.58346	0.00033907	0.00827653
NP_850569	4.39101	5.16119	1.67745	3.07681	0.00209229	0.0297038
M0TPL8	39.7358	5.14815	1.10917	4.64146	3.45953e-06	0.000272979
A0A061SN38	11.8432	5.13285	1.31622	3.8997	9.63139e-05	0.00321575
XP_002865382	4.2995	5.13122	1.53515	3.34249	0.000830313	0.0156748
B9HFU3	15.707	5.12124	1.25179	4.09113	4.29286e-05	0.0017765
NP_192919	4.24939	5.11488	1.8005	2.84081	0.00449986	0.048944
F2E097	5.92679	5.10358	1.2029	4.24274	2.20809e-05	0.00108438
M1CWD8	54.0459	5.1025	0.992238	5.14241	2.71229e-07	4.02413e-05
NP_565736	4.18637	5.09415	1.7901	2.84573	0.00443093	0.0485444
GAQ89697	23.0127	5.09389	1.1241	4.53153	5.85578e-06	0.000398048
UPI0004E58BF9	8.21673	5.09061	1.29335	3.93598	8.2858e-05	0.00286173
EOY01063	8.1898	5.08551	1.20531	4.21924	2.45133e-05	0.0011818
Q6BDJ2	4.13853	5.0752	1.4442	3.51418	0.00044111	0.0100035
BAJ88399	4.10089	5.06259	1.78293	2.83947	0.00451884	0.0490484
AT2G45810	4.08314	5.05667	1.70487	2.96601	0.00301693	0.0378337
G7ICQ5	7.97513	5.04783	1.33769	3.77354	0.00016095	0.00475396
AT1G62240	4.00486	5.02813	1.6224	3.0992	0.00194046	0.0281942
M1CGG6	40.1785	5.02328	1.02698	4.89133	1.00157e-06	0.000108528
AAM97076	3.95413	5.01041	1.62145	3.09007	0.00200107	0.0289535
M0VFU4	5.51879	5.00005	1.26215	3.96153	7.44699e-05	0.00266591
XP_001764365	17.9305	4.9971	1.08683	4.59787	4.26825e-06	0.000316632
A0A061S1R4	3.92106	4.99457	1.25585	3.97704	6.9778e-05	0.00253026
A0A067LAQ1	14.279	4.98753	1.21905	4.09133	4.28902e-05	0.0017765
KHN35016	7.6438	4.98624	1.32222	3.7711	0.000162529	0.00477567
ADE76861	7.6368	4.98468	1.42855	3.48932	0.000484254	0.0107054
NP_563940	3.8779	4.98177	1.69155	2.94509	0.00322859	0.0396387
NP_565407	3.8343	4.96584	1.776	2.79607	0.00517274	0.053817
NP_849462	3.81211	4.95839	1.78267	2.78144	0.00541185	0.0553212
AT1G12230	41.9495	4.95606	1.06318	4.66154	3.13859e-06	0.000255304
AAR25800	3.79714	4.94968	1.54887	3.19568	0.00139503	0.0226608
M0VCC5	10.2791	4.92787	1.35463	3.6378	0.000274975	0.0070391
NP_565336	34.1887	4.9273	1.06548	4.62448	3.75537e-06	0.000288752
ATMG00070	3.69779	4.91356	1.67215	2.93847	0.00329834	0.0401673
AT1G24180	56.9687	4.89748	0.978202	5.00662	5.53953e-07	7.02437e-05
M0TWW5	3.65265	4.89082	1.21379	4.02936	5.59282e-05	0.00216598
XP_002887387	108.205	4.86532	0.97197	5.00563	5.56802e-07	7.02437e-05
XP_002863284	3.56794	4.86043	1.46538	3.31684	0.000910425	0.0167432
A0A061RK70	16.3441	4.85918	1.09917	4.42079	9.83413e-06	0.000593655
XP_010049857	12.856	4.83641	1.19994	4.03053	5.5651e-05	0.00215922
AFK34175	9.52925	4.81734	1.26167	3.81822	0.000134419	0.00414025
AT5G40770	4.86168	4.81436	1.27639	3.77185	0.00016204	0.00476794
E1ZE39	3.45703	4.81293	1.28026	3.75935	0.000170355	0.00493858
A9TBU8	4.82885	4.8047	1.30974	3.66843	0.000244042	0.00645104
D8TH65	12.5518	4.8025	1.14016	4.21214	2.52966e-05	0.00120304
XP_002863736	3.4229	4.80167	1.62017	2.96369	0.00303979	0.038008
NP_195051	3.42406	4.80164	1.54695	3.10394	0.00190964	0.0278617
D8R7T4	3.40018	4.78829	1.21157	3.95214	7.74568e-05	0.00272886
AAD03482	3.35056	4.77129	1.76612	2.70156	0.00690148	0.0641095
XP_011101827	4.70559	4.76891	1.45583	3.27574	0.00105386	0.0185917
W5D187	9.2035	4.76796	1.35606	3.51605	0.00043802	0.00997644
AAD24195	422.567	4.71423	1.03907	4.53696	5.70699e-06	0.000394213
BAJ94089	4.50654	4.70551	1.44993	3.24534	0.0011731	0.0200424
XP_011076657	254.465	4.69918	1.05229	4.46567	7.98193e-06	0.00050198
C1FIE7	4.45827	4.68758	1.25902	3.7232	0.00019671	0.0054766
XP_001701557	54.9943	4.68756	1.11896	4.18922	2.7992e-05	0.00128067
AT1G74310	69.5225	4.68571	0.818675	5.72352	1.04337e-08	2.9309e-06
AT3G57160	6.21715	4.68344	1.31437	3.56325	0.000366287	0.00872956
AT2G22240	109.06	4.67078	0.976787	4.78178	1.73748e-06	0.000160675
A8J7J2	11.4935	4.6701	1.21126	3.85555	0.000115468	0.00373112
D2X656	4.39826	4.67001	1.32307	3.52968	0.000416059	0.00962187
K7U8E9	3.08909	4.6483	1.1964	3.88524	0.000102227	0.00337045
M1A1B4	31.0566	4.64762	1.15393	4.02764	5.63406e-05	0.00217251
XP_004302704	3.05037	4.63257	1.47664	3.13724	0.00170548	0.0258569
XP_004493963	3.04501	4.63212	1.50035	3.08736	0.00201946	0.0291211
E9IPJ6	3.03441	4.62782	1.75427	2.63803	0.00833903	0.0723758
A0A0A0LPD2	13.8756	4.62426	1.04771	4.41369	1.01625e-05	0.000606526
AT1G45000	8.23718	4.60502	1.18634	3.88171	0.000103725	0.00341451
EOY17632	35.5782	4.60001	0.941866	4.88393	1.0399e-06	0.000111211
A4RQL0	24.3495	4.58552	1.13945	4.02432	5.71398e-05	0.00217849
WP_017653375	706.555	4.58154	0.959057	4.77713	1.77817e-06	0.00016288
XP_003383672	1389.12	4.57816	0.985724	4.64446	3.40962e-06	0.000271071
XP_003058407	37.4171	4.57003	1.08918	4.19583	2.71875e-05	0.00126164
F6HY98	4.08838	4.56377	1.36984	3.33161	0.000863454	0.0160134
AT3G63230	5.6763	4.55077	1.35973	3.34682	0.000817433	0.0155697
AT5G55070	44.8165	4.54528	0.981589	4.63054	3.64722e-06	0.000282517
A9SMW6	5.63912	4.54039	1.26762	3.58181	0.000341217	0.00829153
KYQ91283	255.778	4.53288	0.993259	4.56364	5.02748e-06	0.000359047
AT5G49500	49.4835	4.52932	1.03475	4.37722	1.20203e-05	0.000686295
NP_001148635	7.79418	4.52258	1.26254	3.58212	0.000340811	0.00829124
AT4G22380	18.1048	4.52257	1.12351	4.02538	5.68841e-05	0.00217849
D8R264	3.96062	4.51808	1.33701	3.37925	0.000726841	0.0143785
E1ZCG1	18.0761	4.51765	1.03778	4.3532	1.34165e-05	0.00074574
F2DY34	7.75218	4.51458	1.22844	3.67506	0.000237791	0.00631752
D8SEL9	5.49673	4.50239	1.21512	3.70531	0.00021113	0.00575719
A9TD27	63.19	4.48732	0.916574	4.89575	9.79304e-07	0.000107458
XP_006413271	181.094	4.47926	0.946635	4.73177	2.22565e-06	0.000195375
CEF67560	406.231	4.47439	0.980421	4.56374	5.02499e-06	0.000359047
XP_013755149	220.026	4.46754	1.0032	4.45327	8.45724e-06	0.000522513
C1E0T7	5.35593	4.46449	1.27142	3.51142	0.000445726	0.0100974
NP_173520	2.69433	4.45594	1.64557	2.70785	0.00677214	0.0633269
XM_002882802	5.28822	4.45513	1.59476	2.79361	0.00521232	0.0540685
A9TC27	29.5284	4.4476	1.05897	4.19993	2.67001e-05	0.00124981
NP_001189996	54.1808	4.44734	0.822766	5.40535	6.46816e-08	1.21671e-05
A0A078JME4	2.67453	4.44447	1.64655	2.69927	0.00694921	0.0643542
NP_191096	2.66868	4.43988	1.50331	2.95341	0.00314286	0.0389166
XP_002506532	3.75803	4.43942	1.33424	3.32731	0.000876885	0.0162208
NP_182042	2.66486	4.43858	1.70994	2.59575	0.00943834	0.0782554
I1LTY5	2.66047	4.43665	1.38283	3.20838	0.00133486	0.0219537
XP_002882555	87.7995	4.43458	1.07767	4.11496	3.87246e-05	0.00163919
KMZ60616	36.1363	4.41652	0.999224	4.41996	9.87213e-06	0.000594246
XP_004335836	518.038	4.41634	0.978657	4.51266	6.40206e-06	0.000425484
NP_568036	2.59731	4.40347	1.7241	2.55407	0.0106472	0.0836681
WP_027228260	176.458	4.40183	1.00192	4.3934	1.11592e-05	0.000647662
GAQ80165	54.8214	4.4013	1.00452	4.38152	1.17856e-05	0.000676563
UPI000498EECD	116.835	4.40094	0.925866	4.75333	2.00097e-06	0.000179956
XP_003285810	125.596	4.39335	1.03863	4.22996	2.33736e-05	0.00113203
W1PJ01	11.8514	4.38949	1.19467	3.67424	0.00023856	0.00632995
A8IYG8	9.4543	4.38809	1.20115	3.65325	0.000258945	0.00672683
C1MR17	3.63177	4.38724	1.19581	3.66885	0.000243649	0.00645104
Q93XB4	3.63051	4.3868	1.21413	3.61313	0.000302518	0.00755149
A6MWT5	3688.22	4.38476	0.961406	4.56077	5.09653e-06	0.000362749
A0A061SCC3	14.1599	4.38265	1.00782	4.34865	1.3698e-05	0.000755646
D8U7E7	2.53126	4.36194	1.37952	3.16192	0.00156735	0.0245326
DAA62808	3.51753	4.34279	1.29805	3.34564	0.000820927	0.0156077
C7J004	2.497	4.34029	1.31939	3.28961	0.00100327	0.0179736
XP_002882421	89.2809	4.33993	1.05937	4.09673	4.19026e-05	0.00174813
NP_001031340	2.48055	4.33488	1.54534	2.80513	0.00502967	0.0528183
KIK69689	1140.35	4.32905	0.95829	4.51747	6.25826e-06	0.000417244
XP_002279631	38.4659	4.32582	0.96315	4.49132	7.07824e-06	0.000463119
A0A061ET11	4.84731	4.31782	1.19445	3.6149	0.000300468	0.00752912
XP_003082379	60.6876	4.31385	0.944188	4.56885	4.90411e-06	0.000356275
XP_001777839	55.8758	4.30745	0.93869	4.58879	4.45819e-06	0.000327265
AAM64316	26.8413	4.3048	1.02769	4.18881	2.80425e-05	0.00128067
XP_001767575	6.67528	4.29513	1.23921	3.46603	0.000528201	0.0114252
D8QX02	6.63894	4.29326	1.25239	3.42805	0.000607941	0.0126437
AT2G34080	178.696	4.28593	1.01691	4.21466	2.50158e-05	0.00119742
K7VF02	4.7356	4.28307	1.31878	3.24775	0.00116323	0.01996
NP_568778	2.3898	4.28118	1.57542	2.71748	0.00657803	0.0621904
XP_010043208	46.0504	4.27815	1.02743	4.16393	3.1282e-05	0.0013904
NP_850860	61.2618	4.27706	1.04877	4.07815	4.53951e-05	0.00184987
E1Z8J4	3.35843	4.27338	1.24775	3.42488	0.000615071	0.0127042
XP_013753243	437.511	4.26666	1.03668	4.1157	3.86011e-05	0.00163919
A0A061S6J6	6.52936	4.2626	1.24908	3.41258	0.000643504	0.0131497
Q9FDW8	13.0084	4.26254	1.15286	3.69736	0.000217857	0.00589949
XP_010550474	34.7146	4.25756	0.990815	4.29702	1.73106e-05	0.000914034
NP_564994	38.6319	4.24769	0.993403	4.2759	1.90369e-05	0.000973469
UPI00053F4B5D	3.25834	4.22705	1.2473	3.38896	0.000701589	0.0139872
XP_004151864	4.55359	4.22603	1.3027	3.24404	0.00117845	0.0200709
J3LBG1	21.1284	4.2242	1.04098	4.05791	4.95145e-05	0.00196373
XP_004335426	1327.57	4.22107	1.01807	4.14616	3.38098e-05	0.00148177
EFA81599	469.723	4.21953	0.946149	4.45969	8.20799e-06	0.000513133
K3Z6L4	10.526	4.21784	1.09641	3.84694	0.000119602	0.0038411
UPI0002C31831	4.50388	4.20561	1.07132	3.92565	8.64958e-05	0.00296308
UPI00052EAEAE	6.27243	4.20472	1.20002	3.50389	0.000458523	0.0102768
NP_179544	2.26298	4.20203	1.58254	2.65524	0.0079252	0.0703023
C5Y9M4	2.26538	4.20066	1.38145	3.04077	0.00235974	0.0320646
GAQ88964	3.19645	4.1993	1.21469	3.45709	0.000546044	0.011632
XP_013897657	6.21775	4.19152	1.34401	3.11868	0.00181665	0.026991
Q41340	3.17158	4.1907	1.30383	3.21415	0.00130829	0.0216592
XP_010544830	3.1599	4.18613	1.44947	2.88804	0.00387651	0.0448246
UPI00053C9070	3.13871	4.17418	1.15149	3.62502	0.000288936	0.00729893
AT2G36460	18.3762	4.16841	1.02001	4.08665	4.37655e-05	0.00179737
XP_004299113	2.21237	4.16685	1.37699	3.02605	0.0024777	0.0331078
AT3G58500	6.10388	4.165	1.3111	3.17672	0.00148949	0.0236657
XM_002865986	20.2504	4.16142	1.03935	4.00387	6.23134e-05	0.00232769
AT4G39080	86.9474	4.16031	1.00119	4.15536	3.24782e-05	0.00143449
A0A059LBT4	293.324	4.15948	0.96514	4.30971	1.63467e-05	0.000871878
CAB16820	34.2992	4.15545	1.02517	4.05343	5.04716e-05	0.00197469
A4S6J1	14.0854	4.15308	1.01999	4.07169	4.66734e-05	0.00189099
K4CDF4	8.05163	4.15146	1.2545	3.30926	0.000935416	0.0170626
XP_002876595	119.93	4.14184	0.909996	4.55149	5.32674e-06	0.000372489
AT3G27906	23.9352	4.14181	1.00548	4.11925	3.80106e-05	0.00162107
U5CW05	12.014	4.13999	1.03535	3.99864	6.37062e-05	0.00236296
A0A061SAZ8	49.6995	4.1357	0.971887	4.25533	2.08744e-05	0.0010496
M4DCB1	23.8658	4.13226	1.07668	3.83795	0.000124067	0.00395437
NP_974242	15.86	4.12844	1.10029	3.75215	0.000175326	0.00505303
EMT15481	17.8582	4.12497	1.08921	3.78714	0.000152392	0.0045769
XP_001693714	17.6854	4.11268	0.935662	4.39547	1.10532e-05	0.000645178
XP_002890730	103.402	4.10463	0.990016	4.14602	3.38301e-05	0.00148177
XP_006431436	387.804	4.10404	0.955666	4.29443	1.75146e-05	0.000922493
AT5G56670	11.68	4.09927	0.969695	4.22738	2.36431e-05	0.00114246
W9SKK2	58.3878	4.09867	0.932868	4.39363	1.11475e-05	0.000647662
UPI00052EF8DD	7.7207	4.08823	1.21484	3.36523	0.000764787	0.014919
B9RJN3	4.14354	4.08574	1.17482	3.47777	0.000505609	0.0110043
XP_002307728	2.95145	4.08556	1.31558	3.10553	0.0018994	0.0277671
XP_006657420	291.268	4.08002	0.986337	4.13654	3.52583e-05	0.00152218
CAA55545	468.852	4.079	0.900011	4.53217	5.838e-06	0.000398048
ACJ06506	2.06572	4.0717	1.35939	2.99525	0.00274223	0.0354562
NP_564208	2.05647	4.06289	1.65032	2.46187	0.0138214	0.0973878
XP_015366154	874.012	4.06166	0.924062	4.39543	1.10551e-05	0.000645178
UPI0004E5673E	2.05662	4.05969	1.25456	3.23593	0.00121245	0.0204375
XP_011621084	181.756	4.05954	0.952332	4.26274	2.01938e-05	0.00102516
A0A068ULV7	37.7518	4.05834	0.997487	4.06856	4.73043e-05	0.00190921
XP_002444385	9.36476	4.05144	1.1879	3.41058	0.000648248	0.0132159
AT4G26390	50.6873	4.04875	0.927397	4.36572	1.26706e-05	0.000717074
BAJ94652	46.8113	4.04745	0.966795	4.18647	2.8333e-05	0.00128095
UPI00032A6C4F	2.87344	4.04618	1.3294	3.04361	0.00233756	0.0318715
XP_007156345	42.8153	4.03733	0.964253	4.187	2.82662e-05	0.00128067
A0A0A0LID1	35.3993	4.03685	0.976589	4.13363	3.57083e-05	0.00153845
XP_008368150	74.5314	4.03678	0.963903	4.18795	2.81481e-05	0.00128067
XP_004507405	4.00168	4.03671	1.36896	2.94874	0.00319072	0.0393341
M0V0F3	2.83545	4.03488	1.08525	3.71791	0.000200875	0.00554656
A0A059BH32	50.0633	4.02816	0.956573	4.21104	2.542e-05	0.00120619
XP_012087350	24.083	4.02807	1.06707	3.77488	0.000160085	0.00474355
NP_001241830	2.84403	4.02776	1.24943	3.22369	0.0012655	0.021093
Q9LVW0	9.26599	4.027	1.04923	3.83805	0.000124013	0.00395437
XP_013400123	297.747	4.02386	0.994534	4.04598	5.21057e-05	0.00202914
A9RHV4	92.1876	4.02373	0.962378	4.18103	2.90196e-05	0.00130917
NP_200667	25.6354	4.01527	1.01394	3.96008	7.49248e-05	0.00267422
A8HMZ3	14.6517	4.01112	1.03597	3.87186	0.000108008	0.00353341
AT3G18780	2333.92	4.01015	0.769109	5.21402	1.84789e-07	2.90532e-05
XP_001782306	2.8042	4.00792	1.28541	3.118	0.00182081	0.0270147
W1PYQ0	1.97765	4.00681	1.50567	2.66114	0.00778755	0.0696384
AT3G44740	23.6387	4.00008	0.984786	4.06188	4.86792e-05	0.00194779
AT5G09590	37.797	3.98383	0.836842	4.76055	1.93063e-06	0.000175321
AT4G33370	1.94287	3.97741	1.35844	2.92793	0.00341228	0.0410096
C1E8T3	3.84062	3.97423	1.20857	3.28837	0.0010077	0.0180222
XP_005646550	31.7757	3.95505	0.943783	4.19064	2.78173e-05	0.0012796
A0A061S9N0	38.8695	3.95486	0.953192	4.14907	3.33823e-05	0.00146826
F6HXR2	5.26524	3.9511	1.27218	3.10577	0.00189786	0.0277671
V4VUM4	1.91053	3.951	1.15564	3.4189	0.000628755	0.0128862
XP_002970239	7.00148	3.94343	1.2554	3.14118	0.00168268	0.0255593
A0A061RF49	10.3358	3.92848	0.854161	4.59923	4.24059e-06	0.000316632
C0PIZ0	3.70489	3.923	1.22293	3.20788	0.00133718	0.0219748
NP_974914	1.86033	3.92004	1.49687	2.61883	0.00882312	0.0752264
XP_001786066	3.67787	3.91141	1.21308	3.22435	0.00126258	0.0210609
C0PE41	3.65973	3.90403	1.27025	3.07342	0.00211618	0.029942
S8CMH2	2.60476	3.89513	1.14224	3.4101	0.000649401	0.0132159
A0A067EEF9	38.8021	3.89509	0.926289	4.20505	2.61028e-05	0.00123304
NP_190918	16.8873	3.89304	0.944755	4.12069	3.77736e-05	0.00161423
AT3G45070	25.1441	3.88833	0.695029	5.59449	2.21275e-08	4.90718e-06
BAG87969	32.0108	3.88729	0.918361	4.23286	2.30736e-05	0.00112267
AT3G07590	1.79725	3.86791	1.50543	2.56931	0.0101902	0.0814385
XP_004334896	180.462	3.86369	0.937263	4.12231	3.7509e-05	0.00160618
AT1G50920	61.1522	3.86207	0.936683	4.12314	3.73749e-05	0.00160369
A0A087S9R0	3.55189	3.86167	1.22389	3.15525	0.00160361	0.0248784
NP_189997	24.7538	3.86021	0.950809	4.05992	4.90897e-05	0.00195875
AT2G41110	21.4075	3.85898	0.811082	4.75782	1.95697e-06	0.000176951
CEG63488	292.096	3.85152	0.980774	3.92701	8.60068e-05	0.00295112
I1MWP1	3.52241	3.84736	1.24614	3.08743	0.00201895	0.0291211
NP_680337	22.8694	3.84504	0.947931	4.05624	4.98681e-05	0.00196746
A9TH34	76.8327	3.84503	0.884565	4.3468	1.38136e-05	0.000755912
AT3G49870	4.90012	3.8384	1.12279	3.41862	0.000629388	0.0128862
C5X3Z0	13.0091	3.83771	1.08988	3.52124	0.000429538	0.00984712
A0A090M5U9	2.48171	3.83245	1.54074	2.48741	0.0128677	0.0939023
A4RVG3	3.47679	3.82623	1.17092	3.2677	0.00108425	0.0189726
XP_009619448	81.8745	3.81976	0.822211	4.64572	3.38886e-06	0.000270442
AT1G53165	48.1298	3.81623	0.990218	3.85392	0.00011624	0.00374458
NP_974269	27.0557	3.80595	0.962629	3.9537	7.69515e-05	0.00272016
XP_009590673	11.0833	3.79922	1.04368	3.6402	0.000272422	0.00700779
D8TKN4	9.51304	3.79854	1.08626	3.4969	0.000470696	0.0104827
XP_013896342	4.74549	3.79622	1.07356	3.5361	0.000406086	0.00947444
F2DH98	2.42516	3.79568	1.15915	3.27453	0.00105838	0.0186437
NP_001234832	18.8373	3.7859	0.989261	3.827	0.000129716	0.00404268
NP_178552	9.401	3.78438	1.12977	3.34968	0.000809036	0.0154531
AT3G60100	87.7742	3.78259	0.719018	5.26077	1.43452e-07	2.3986e-05
XP_003055797	35.8398	3.77385	0.95267	3.96134	7.45312e-05	0.00266591
AT1G58983	107.374	3.77127	0.911419	4.1378	3.50657e-05	0.00152009
D7SZ58	2.38075	3.76854	1.31142	2.87363	0.00405785	0.0462362
NP_198101	20.1305	3.76767	0.977373	3.8549	0.000115778	0.00373539
XP_015055637	4.65055	3.76395	1.27382	2.95485	0.00312821	0.0388134
K4BPJ0	35.3428	3.75373	1.01255	3.70719	0.00020957	0.00572661
XP_016130190	405.2	3.75256	0.893686	4.19896	2.68138e-05	0.00124981
XP_002186290	670.861	3.75215	0.938061	3.9999	6.3369e-05	0.0023546
UPI00053C5286	56.7039	3.75112	0.895892	4.18702	2.82643e-05	0.00128067
C0PR65	3.30858	3.74977	1.18385	3.16744	0.00153787	0.0242152
D8S0L6	6.11867	3.74734	1.11555	3.35917	0.000781762	0.0151799
XP_002367195	293.806	3.7472	0.912891	4.10476	4.04743e-05	0.00169863
C1FE89	39.7097	3.74567	0.960191	3.90096	9.58109e-05	0.00320404
A8IGH4	30.4625	3.7385	0.805812	4.63942	3.49392e-06	0.000274664
AT3G11380	1.64854	3.73151	1.27193	2.93373	0.00334911	0.0405512
G3EKI9	2.3152	3.72773	1.25815	2.96287	0.00304786	0.0380643
XP_010650232	6.04741	3.72707	1.17063	3.18382	0.00145347	0.0233765
M1AW83	13.5711	3.72417	1.02881	3.61988	0.000294734	0.00742758
XP_002507984	27.0465	3.7194	0.970653	3.83185	0.000127181	0.00400516
XP_003322588	118.268	3.71651	0.885021	4.19935	2.67685e-05	0.00124981
AAR91505	137.462	3.7125	0.933603	3.97653	6.9928e-05	0.00253135
W5E9E2	3.23145	3.71175	1.06556	3.48338	0.000495124	0.0108659
XP_008031933	160.595	3.70578	0.915284	4.04878	5.14853e-05	0.00200869
XP_004352812	139.877	3.70534	0.938172	3.94953	7.83043e-05	0.00274039
NP_001031465	59.1682	3.69805	0.904251	4.08963	4.32069e-05	0.00177856
NP_849678	28.145	3.69737	0.964423	3.83376	0.0001262	0.00400365
K8EA69	1.60233	3.69641	1.43279	2.57987	0.00988384	0.0801821
A0A068XS59	63.5937	3.69475	0.829248	4.45555	8.36802e-06	0.000518522
XP_004365701	296.369	3.6934	0.894078	4.13096	3.61257e-05	0.00155326
XP_002962022	1.59548	3.68848	1.34026	2.75206	0.00592211	0.0583627
EMJ16574	2.25083	3.68422	1.27018	2.90055	0.00372508	0.0436242
ESA21719	100.793	3.68087	0.933529	3.94297	8.04799e-05	0.00279794
XP_014274948	112.013	3.67198	0.895626	4.0999	4.13326e-05	0.0017312
XP_005832655	153.516	3.66644	0.963145	3.80673	0.000140814	0.0042933
F2E0E1	5.7938	3.66031	1.1346	3.22609	0.00125495	0.0209669
AAT69128	2.20841	3.65483	1.24622	2.93274	0.00335987	0.0406114
D7TNC5	1.54886	3.65329	1.36842	2.66971	0.00759175	0.0684102
XP_010937547	74.6696	3.65198	1.01723	3.59012	0.000330527	0.00810656
S8C0F2	1.54231	3.64792	1.38088	2.64174	0.00824816	0.071969
EDL30933	3.07791	3.64724	1.01429	3.59586	0.000323327	0.00797267
XP_001745439	312.565	3.64471	0.89818	4.05788	4.95204e-05	0.00196373
XP_012460843	4.30769	3.64465	1.06876	3.41016	0.00064924	0.0132159
C6T692	1.53513	3.64243	1.40715	2.58852	0.00963898	0.0790798
BAK01673	699.464	3.63178	0.445018	8.16098	3.32326e-16	7.00144e-12
XP_002990319	26.7408	3.62354	0.94935	3.81687	0.000135156	0.00415688
XP_007315533	440.621	3.61024	0.97773	3.69247	0.000222087	0.00598329
XP_002961294	4.20331	3.60885	1.28623	2.80576	0.00501981	0.0527468
XP_009112687	52.5511	3.59646	0.869315	4.13712	3.51689e-05	0.00152143
CAM34499	321.993	3.59591	0.884401	4.06593	4.78423e-05	0.00192723
Q9AWU5	8.30492	3.59415	1.06945	3.36074	0.000777327	0.0151083
D8QTX2	204.164	3.58385	0.908155	3.9463	7.9369e-05	0.00276845
D8TS65	5.47189	3.58022	1.12165	3.19192	0.00141332	0.0228913
XP_002518738	12.2201	3.57661	0.83426	4.28717	1.80965e-05	0.000943708
AAF27099	40.9134	3.57533	0.89782	3.98223	6.82711e-05	0.00247989
ACY71305	195.451	3.56929	0.925495	3.85663	0.000114962	0.00372047
S8EL69	21.6135	3.56076	0.703138	5.0641	4.10341e-07	5.5417e-05
AT3G28345	16.1346	3.55713	0.935092	3.80404	0.000142356	0.00433403
XP_013932382	282.051	3.55537	0.96606	3.68028	0.000232978	0.00620527
A9S4D1	8.07194	3.5551	1.0317	3.44587	0.000569219	0.0120163
AT4G33010	18.8338	3.55457	0.654462	5.43129	5.59479e-08	1.07155e-05
F2E6T6	2.04217	3.55308	1.31997	2.6918	0.00710678	0.0652473
F2DP73	2.03134	3.55224	1.24087	2.8627	0.00420051	0.0471127
AT5G10360	34.7943	3.54953	0.751236	4.72492	2.3021e-06	0.000199591
A4RZJ5	217.494	3.53589	0.924672	3.82394	0.000131336	0.00406645
AT1G26630	18.5847	3.53586	0.712702	4.9612	7.00604e-07	8.39092e-05
P51414	159.108	3.53437	0.940116	3.75951	0.000170248	0.00493858
UPI00049924C1	1.42812	3.53181	1.29015	2.73751	0.00619064	0.0599484
A8IT96	1.41697	3.53017	1.09917	3.21167	0.00131966	0.0217889
XP_012066284	2.02678	3.53014	1.31253	2.68956	0.00715461	0.0655914
E5GC40	21.066	3.52394	0.994575	3.54316	0.000395358	0.00926519
AEY84977	185.179	3.52213	0.891525	3.95068	7.79293e-05	0.00273276
A4RUF7	5.24753	3.5205	1.21354	2.90101	0.00371964	0.0435848
XP_002503454	15.7189	3.5154	1.13314	3.10237	0.00191979	0.0279711
XP_002668965	357.361	3.51218	0.884153	3.97237	7.11615e-05	0.00256279
AT1G50370	55.9869	3.50827	0.784253	4.47339	7.69878e-06	0.000491509
XP_002950537	2.78266	3.50189	1.42181	2.46297	0.013779	0.0972513
ADF47312	1.98515	3.49689	1.25009	2.79732	0.0051529	0.0536821
AT5G53400	5.16628	3.4968	1.19187	2.93388	0.00334753	0.0405512
AT3G29360	28.2178	3.48902	0.689141	5.06285	4.13024e-07	5.54242e-05
AIU94816	157.129	3.47999	0.952523	3.65344	0.000258748	0.00672683
V9H129	62.0317	3.46405	0.769225	4.5033	6.69051e-06	0.00043962
AAX48836	240.898	3.46168	0.954354	3.62725	0.000286461	0.00725381
XP_012456982	28.8734	3.45785	0.723155	4.78162	1.73884e-06	0.000160675
GAQ81557	35.2424	3.45714	0.968481	3.56965	0.000357459	0.00857371
AT2G30970	42.6826	3.45199	0.739884	4.66559	3.07734e-06	0.000251292
A0A068V0E6	1.33401	3.43469	1.33125	2.58005	0.00987851	0.0801821
XP_013655109	3.70777	3.43394	1.2255	2.80206	0.00507772	0.0531627
EME48945	472.635	3.43306	0.962744	3.56591	0.000362589	0.00866103
NP_180339	16.0794	3.42961	0.619262	5.53823	3.05551e-08	6.37361e-06
XM_002884116	1.88011	3.42938	1.23003	2.78805	0.00530258	0.0547621
AT5G09490	113.56	3.42926	0.845706	4.05491	5.0153e-05	0.00197465
XP_006682844	186.186	3.42566	0.899049	3.81031	0.000138792	0.00423778
P85137	27.0602	3.42458	0.993457	3.44714	0.000566561	0.0119843
A0A078DUM4	327.857	3.42286	0.935694	3.6581	0.000254094	0.00665001
XP_003373139	132.795	3.42252	0.908773	3.76608	0.000165828	0.00484558
Q0WLB6	1.89083	3.42213	1.19358	2.86712	0.00414221	0.0467969
XP_009514337	164.457	3.42057	0.962418	3.55415	0.000379207	0.00899677
A0A078GQL8	1.87559	3.41536	1.25537	2.72061	0.00651626	0.061812
EOY18433	11.0023	3.4075	0.911872	3.73682	0.000186362	0.00529131
XP_009137518	7.27235	3.40297	1.07833	3.15576	0.0016008	0.0248531
XP_002315386	14.4921	3.39603	0.938658	3.61797	0.000296926	0.00747387
AT4G14960	48.2034	3.39377	0.60942	5.56885	2.56429e-08	5.40245e-06
C9DFA8	1.84316	3.39134	1.17538	2.88532	0.0039101	0.0451044
I3SAA6	20.5144	3.38852	0.652142	5.19598	2.03644e-07	3.08659e-05
XP_002955386	3.59009	3.38705	1.31915	2.56759	0.0102407	0.0815388
AAP32196	1.80567	3.3865	1.08784	3.11305	0.00185162	0.0273404
AT1G19210	130.909	3.37969	0.804159	4.20276	2.6368e-05	0.00124
W1P5G8	3.59118	3.37557	1.22287	2.76036	0.00577376	0.0575788
CAR82270	156.927	3.37251	0.927835	3.63481	0.000278185	0.00708179
A5C3V2	5.97115	3.36965	1.00265	3.36073	0.00077736	0.0151083
CDQ93017	82.9671	3.36893	0.844695	3.98834	6.65368e-05	0.00242946
XP_001697682	1.81095	3.36823	1.35486	2.48604	0.0129172	0.0941757
NP_001118714	7.08977	3.36636	0.719766	4.67702	2.91074e-06	0.000244317
F6GZH5	7.12808	3.36507	0.720035	4.67348	2.96141e-06	0.000246605
ALS04092	273.653	3.35631	0.906439	3.70275	0.000213278	0.0057904
XP_013761040	111.566	3.35459	0.923258	3.63343	0.00027968	0.00710772
A8JGG4	7.03165	3.34677	1.04608	3.19934	0.00137744	0.0225135
Q9NH76	98.0989	3.34472	0.633585	5.27903	1.29866e-07	2.22441e-05
AT1G78720	23.3006	3.34096	0.687485	4.85968	1.17573e-06	0.000120831
F2E5Q3	46.3602	3.34046	0.487036	6.85875	6.94642e-12	1.82934e-08
XP_002890537	4.59667	3.32795	0.983214	3.38477	0.00071239	0.0141591
XP_010919584	1.76896	3.32628	1.31121	2.5368	0.0111871	0.0861393
ABK23110	8.08324	3.32624	1.08185	3.07458	0.00210796	0.0298659
E9IKW6	1.23477	3.31326	1.09073	3.03765	0.00238434	0.0322628
BAK02721	3.39751	3.31002	1.02523	3.22855	0.00124419	0.0208699
A9TMK8	2.43119	3.29079	1.19125	2.76248	0.0057364	0.0574403
AT1G50480	21.3761	3.28923	0.532568	6.17618	6.5673e-10	4.94142e-07
A8JHX9	52.2562	3.27349	0.704939	4.64364	3.42317e-06	0.000271125
XP_001777542	4.45037	3.27093	0.989829	3.30454	0.000951325	0.0172929
E1Z8N4	6.63707	3.2694	0.81267	4.02304	5.74528e-05	0.00218486
XP_011429705	976.374	3.26718	0.893386	3.65707	0.000255114	0.00666014
XP_001785817	3.32845	3.25985	1.10839	2.94106	0.00327093	0.0399124
AT5G09550	104.69	3.25943	0.664546	4.90475	9.35488e-07	0.000105395
A9RZJ0	65.1492	3.2581	0.489467	6.65642	2.80575e-11	4.92596e-08
A9TBH3	5.49268	3.25506	1.30651	2.49141	0.0127236	0.093174
AAG52185	19.5563	3.23697	0.827365	3.91238	9.13897e-05	0.00309193
XP_009529898	240.014	3.21738	0.906326	3.54991	0.000385363	0.00908147
UPI0003EAAA17	23.517	3.21645	0.899238	3.57686	0.000347744	0.00839207
AT3G16380	4.20628	3.20978	1.23754	2.59368	0.00949538	0.0785466
CDQ76800	201.566	3.17955	0.41937	7.58174	3.40956e-14	3.54703e-10
UPI00053C729B	1.56336	3.171	1.13049	2.80497	0.00503208	0.0528183
C6JSG0	9.36306	3.16473	0.953661	3.31851	0.00090499	0.0166664
AT3G20210	136.285	3.16437	0.457737	6.91306	4.74297e-12	1.66542e-08
D8SKL7	825.376	3.16397	0.936133	3.37983	0.000725304	0.0143698
AT5G35590	18.6391	3.16364	0.90933	3.47909	0.000503117	0.0109622
UPI0004E55157	2.21182	3.1499	1.11057	2.83629	0.00456414	0.0494382
BAK01853	1.57153	3.1465	1.18756	2.64955	0.00805993	0.0709894
NP_001032142	39.904	3.14399	0.923312	3.40513	0.000661334	0.0133842
AT5G38480	78.4471	3.14308	0.635845	4.94315	7.68684e-07	9.04728e-05
CAB87903	1.56129	3.13876	1.18625	2.64594	0.00814641	0.0714327
AT4G18800	10.1031	3.13208	0.72142	4.34156	1.41477e-05	0.000772183
UPI00053F492A	29.0586	3.11798	0.526263	5.92476	3.12758e-09	1.32326e-06
XP_002874346	19.9599	3.10824	0.581269	5.34734	8.92561e-08	1.59602e-05
AT1G73540/AT1G18300	594.503	3.09418	0.606685	5.10014	3.39394e-07	4.7669e-05
BAK00769	14.7577	3.08882	0.944598	3.26999	0.00107552	0.0188512
AT1G70710	492.881	3.08524	0.724724	4.25713	2.07067e-05	0.00104616
S8D3T0	1.48981	3.07849	1.24944	2.46389	0.0137438	0.0971656
AT2G47570	14.669	3.07806	0.805486	3.82137	0.000132711	0.00409965
M0TEG8	28.0681	3.06242	0.528514	5.7944	6.85658e-09	2.12433e-06
AT4G09000	10.6528	3.06218	0.637223	4.80551	1.54354e-06	0.000149171
K8F2E6	14.3062	3.04907	0.65118	4.68238	2.83559e-06	0.000238961
UPI00053BB800	43.8732	3.04605	0.924153	3.29604	0.000980564	0.0177022
XP_010312452	3.76763	3.03265	0.952888	3.18259	0.00145965	0.0233983
A0A068TQV6	1.44746	3.0298	1.10134	2.75102	0.00594096	0.058409
AT4G21710	6.51386	3.02113	1.00372	3.00994	0.00261298	0.0344279
KXS21311	108.086	3.02085	0.453568	6.66018	2.73494e-11	4.92596e-08
BAJ95824	5.56866	3.00571	0.799622	3.75892	0.000170651	0.00493858
AT1G23900	3.70608	2.98824	1.09921	2.71854	0.00655712	0.0620921
A9SAX9	1.40311	2.98567	1.14825	2.60019	0.00931735	0.0776232
BAK00750	598.244	2.98022	0.64361	4.63048	3.64816e-06	0.000282517
AT1G52320	1.38895	2.96929	1.04558	2.83986	0.00451334	0.049014
A9RKW1	7.21934	2.96581	0.908543	3.26436	0.00109713	0.0191502
XP_004511926	30.6506	2.95787	0.87587	3.37706	0.000732638	0.0144254
AT1G56340	50.2978	2.95308	0.648193	4.55588	5.21678e-06	0.000367583
EFN58602	1.34071	2.93901	1.08654	2.70493	0.00683189	0.0636314
H6U804	47.9499	2.93887	0.49146	5.97989	2.23294e-09	1.14741e-06
A9SPV0	13.967	2.91071	0.577745	5.03805	4.70299e-07	6.09975e-05
M5XT66	9.59408	2.90524	1.16868	2.48591	0.012922	0.0941757
XP_003074463	0.926001	2.89852	1.12079	2.58614	0.00970564	0.0794399
AT1G74870	2.59978	2.89481	1.11989	2.58492	0.00974025	0.0796304
M0UCL4	1.85792	2.89346	1.02846	2.81339	0.00490222	0.0520485
AT3G22961	5.15293	2.88985	0.918971	3.14465	0.00166283	0.025401
AT5G17350	321.47	2.88796	0.595652	4.84841	1.24457e-06	0.000127284
XM_002865477	6.80531	2.87833	1.09431	2.63028	0.00853147	0.0733872
XP_005842952	33.3068	2.87799	0.456106	6.30992	2.79187e-10	2.55735e-07
XP_011624353	0.891784	2.86661	1.14967	2.49342	0.0126518	0.0928736
D5ABJ4	5.05054	2.85162	1.12219	2.54111	0.01105	0.0854943
XP_002951392	5.03875	2.84944	0.857929	3.3213	0.000896007	0.0165182
XP_002610489	248.258	2.84634	0.429357	6.6293	3.37274e-11	5.46591e-08
XP_004629493	199.637	2.84601	0.480834	5.9189	3.24099e-09	1.33885e-06
A9TTB9	10.8853	2.84518	0.994606	2.86061	0.00422828	0.0471829
A8HS48	47.238	2.83028	0.471705	6.00012	1.9717e-09	1.06512e-06
GAQ83739	1.25656	2.82417	1.09608	2.5766	0.00997773	0.0806852
UPI00053970C7	4.93669	2.82298	0.791403	3.56705	0.000361023	0.0086334
AT3G02530	37.8174	2.81849	0.623494	4.52048	6.16995e-06	0.000412662
XP_009615153	13.883	2.80533	0.539687	5.19807	2.01367e-07	3.07421e-05
A0A087SH64	3.25986	2.79604	0.932832	2.99737	0.00272317	0.0353864
WP_045357925	181.833	2.79146	0.45684	6.11038	9.93953e-10	6.34564e-07
AT5G13330	1.71792	2.79059	1.02311	2.72757	0.00638034	0.0610727
T1TEY6	4.01184	2.7868	1.00029	2.78598	0.00533658	0.0549628
AT2G44100	39.4984	2.78314	0.576437	4.82818	1.37787e-06	0.000136287
F2DF58	69.5517	2.77651	0.677544	4.09789	4.16925e-05	0.00174281
AT3G13500	3.98953	2.7695	1.05102	2.63506	0.00841224	0.0726945
XP_002892856	11.0994	2.76489	0.981695	2.81645	0.00485583	0.0516419
NP_172188	11.0356	2.76094	0.708289	3.89804	9.6974e-05	0.00323149
UPI00053C4F69	1.19218	2.75474	1.05791	2.60394	0.00921579	0.0771081
AT1G51040	5.53681	2.75409	0.862847	3.19186	0.0014136	0.0228913
D8TZ21	3.07344	2.72632	1.04225	2.6158	0.00890197	0.0756542
A0A061DGX6	51.6407	2.72187	0.448292	6.07163	1.26617e-09	7.62162e-07
EFX83248	349.814	2.71548	0.404059	6.72049	1.8111e-11	3.81563e-08
AT5G17310	19.0135	2.70249	0.426335	6.33889	2.31427e-10	2.38921e-07
XP_002610290	363.633	2.70212	0.428057	6.31253	2.74517e-10	2.55735e-07
AT2G42380	488.832	2.69696	0.647597	4.16458	3.11932e-05	0.00138938
F2E4Y3	15.0545	2.69223	0.524679	5.1312	2.87899e-07	4.15442e-05
AT5G65270	4.55561	2.69218	0.903196	2.98073	0.00287563	0.036557
AT1G52280	14.3474	2.68833	0.677407	3.96857	7.23059e-05	0.00259644
AT5G28540	25.5862	2.68615	0.48952	5.48732	4.08072e-08	8.09736e-06
XP_001758753	9.74219	2.68181	0.598449	4.48127	7.41985e-06	0.000479298
AT1G75630	49.9615	2.66931	0.567281	4.70546	2.53296e-06	0.000216929
O81903	1.13245	2.6626	1.07479	2.47731	0.0132377	0.0955228
AT1G75600	30.3942	2.6603	0.607589	4.37845	1.19527e-05	0.000684292
XP_002456279	3.65795	2.65256	0.759936	3.49051	0.000482107	0.0106692
F2E6H6	13.8899	2.64958	0.544678	4.86449	1.14755e-06	0.000118512
XP_007436156	93.9213	2.64951	0.408064	6.49287	8.42189e-11	1.17635e-07
XP_011425291	490.624	2.64478	0.373931	7.07291	1.51716e-12	6.39271e-09
AT2G05220	42.7342	2.63155	0.460817	5.71061	1.12571e-08	3.12058e-06
XP_009400770	1.53319	2.62846	1.0019	2.62348	0.00870364	0.0743586
F2DDX0	15.0366	2.61152	0.486272	5.3705	7.85181e-08	1.42605e-05
XP_002882511	17.8602	2.60968	0.679289	3.84179	0.00012214	0.00391071
AT2G18720	9.30481	2.60789	0.888067	2.93659	0.00331843	0.0403653
XP_001752836	10.6652	2.60376	0.692668	3.75902	0.000170578	0.00493858
AT5G13430	28.3889	2.59826	0.573197	4.53292	5.81731e-06	0.000398048
AT4G10240	6.34372	2.59493	0.927133	2.79887	0.00512815	0.0535089
F2DTQ2	5.63786	2.58664	0.989934	2.61295	0.00897655	0.075951
A0A090N4G4	7.05764	2.5829	0.939918	2.74801	0.00599582	0.0586444
XP_001785646	13.3	2.5811	0.734038	3.51631	0.000437595	0.00997644
AT5G08690	79.9136	2.57822	0.37992	6.78623	1.15102e-11	2.6944e-08
A0A059DBQ1	3.53233	2.57528	0.916547	2.80977	0.00495774	0.0523295
AT1G66500	460.743	2.57301	0.527566	4.87713	1.07643e-06	0.00011381
AT5G65130	8.38926	2.56424	0.690755	3.71224	0.000205437	0.00565032
AT5G42300	4.1518	2.55472	0.753145	3.39207	0.00069366	0.0138785
XP_002948116	54.4861	2.55429	0.675014	3.78406	0.000154293	0.00461663
XP_001700927	59.1647	2.54807	0.64597	3.94456	7.99456e-05	0.00278396
AT3G09620	7.54997	2.54607	0.589121	4.32181	1.54752e-05	0.000835978
AT5G22980	16.4986	2.54524	0.731307	3.4804	0.000500668	0.0109569
NP_565390	9.56496	2.54205	0.923751	2.75188	0.00592547	0.0583627
AT5G12190	8.81817	2.52987	0.547553	4.62032	3.83144e-06	0.00029353
A0A061SAH2	48.1769	2.52684	0.606598	4.16559	3.10548e-05	0.00138938
AT3G29000	309.134	2.52237	0.540148	4.66978	3.01517e-06	0.00024969
XP_002596851	236.829	2.52	0.410287	6.14204	8.14673e-10	5.91846e-07
AT2G43020	33.6299	2.51801	0.480893	5.23611	1.63999e-07	2.63751e-05
AT5G26860	18.1336	2.51662	0.534095	4.71193	2.4538e-06	0.000211871
F2DFB6	6.03671	2.5133	0.603713	4.16308	3.13984e-05	0.00139263
UPI00054002CD	10.0729	2.50669	0.833323	3.00806	0.0026292	0.0345984
AT4G20890	41.2206	2.50363	0.580393	4.31368	1.60558e-05	0.000858536
AT1G65930	17.3202	2.49891	0.64288	3.88705	0.000101469	0.00335069
K4CNX0	7.33527	2.49668	0.870061	2.86955	0.00411059	0.0465852
AT5G45550	6.02198	2.49346	0.869642	2.86722	0.00414097	0.0467969
NP_187203	71.6763	2.49341	0.621533	4.0117	6.02823e-05	0.00227603
XP_004972018	11.9762	2.4918	0.688855	3.6173	0.000297687	0.00747518
F2E0C5	946.533	2.48983	0.400047	6.22383	4.85154e-10	4.08849e-07
AT1G58684	224.295	2.4883	0.507738	4.90075	9.54693e-07	0.00010642
F6HQE0	3.29396	2.48694	0.916735	2.71282	0.00667126	0.0626616
AT5G11500	24.3245	2.48398	0.477586	5.20112	1.98094e-07	3.06871e-05
KVH96776	6.58866	2.48159	0.640507	3.87441	0.000106883	0.0035075
AT1G16300	89.8138	2.4755	0.545926	4.53449	5.77422e-06	0.000397553
BAE99616	12.5038	2.47507	0.58253	4.24883	2.14887e-05	0.00106631
AT1G70730	64.3587	2.46922	0.419071	5.89211	3.81286e-09	1.43445e-06
NP_566911	5.25151	2.46819	0.789072	3.12796	0.00176023	0.0263759
XP_006681056	117.809	2.46562	0.501446	4.91702	8.78734e-07	0.000100071
AT1G53780	7.19144	2.46357	0.801643	3.07315	0.00211811	0.0299492
XP_001690405	4.56799	2.46167	0.753058	3.26889	0.0010797	0.0189087
AT1G21690	16.8168	2.45988	0.480676	5.11754	3.09543e-07	4.40639e-05
AT5G15948	228.003	2.45873	0.629603	3.90521	9.41432e-05	0.00315844
AT4G27890	16.8058	2.45733	0.476367	5.15848	2.48958e-07	3.74646e-05
XP_004349715	338.333	2.45663	0.378877	6.48397	8.93377e-11	1.17635e-07
AT3G46000	253.925	2.45642	0.523926	4.68848	2.75242e-06	0.000232884
I3SHC5	18.6607	2.45112	0.512295	4.78459	1.71341e-06	0.000160436
A0A059D105	8.94493	2.4405	0.564404	4.32402	1.53212e-05	0.000829785
XP_011423458	235.219	2.43829	0.414367	5.88438	3.99548e-09	1.47504e-06
Q5V9L3	4.47705	2.43813	0.91791	2.65617	0.0079033	0.0701605
AT3G59970	40.1355	2.43299	0.621888	3.91227	9.14313e-05	0.00309193
AT5G11170	54.4699	2.42388	0.32468	7.46544	8.30211e-14	4.37272e-10
XP_013402087	378.493	2.4238	0.391137	6.19679	5.76246e-10	4.66936e-07
A0A068XPL8	18.9376	2.42317	0.491304	4.93212	8.13405e-07	9.36438e-05
KOF63921	219.511	2.41216	0.39404	6.12162	9.26315e-10	6.29535e-07
ACD88946	264.269	2.4104	0.408359	5.90263	3.57745e-09	1.39574e-06
F2DU06	21.2792	2.40886	0.447664	5.38096	7.40913e-08	1.35735e-05
AT3G56800	9.37445	2.40289	0.757081	3.17389	0.0015041	0.0238438
AT1G55080	22.3637	2.39945	0.427927	5.60716	2.05674e-08	4.63347e-06
XP_010558299	5.0124	2.3983	0.949124	2.52686	0.0115087	0.0876278
GAQ87349	18.1355	2.39741	0.842735	2.8448	0.00444392	0.0485856
CDS24233	290.823	2.39269	0.395053	6.05663	1.39003e-09	8.13479e-07
AT3G53430	173.386	2.39252	0.367805	6.50485	7.77732e-11	1.17038e-07
E9IUQ7	3.7079	2.38992	0.806219	2.96436	0.00303315	0.0379694
AT5G51190	1203.27	2.38712	0.469539	5.08396	3.69642e-07	5.15736e-05
AT1G22300	56.8668	2.38513	0.547921	4.35305	1.34258e-05	0.00074574
AT2G33840	9.91902	2.38456	0.702948	3.39223	0.000693264	0.0138785
D7SLZ6	9.87155	2.37684	0.780925	3.04362	0.0023375	0.0318715
AT3G55940	8.63387	2.37514	0.830122	2.86119	0.00422055	0.0471829
KXJ21524	115.768	2.37068	0.588004	4.03173	5.53671e-05	0.00215217
XP_004701620	266.669	2.37043	0.399924	5.92719	3.0817e-09	1.32326e-06
KFD58552	310.046	2.36805	0.373835	6.33448	2.3815e-10	2.38921e-07
ATCG00120	3.68159	2.36741	0.9647	2.45404	0.0141262	0.0985561
ADK55598	500.695	2.36564	0.424618	5.57122	2.52955e-08	5.38308e-06
AT4G32830	24.9494	2.36534	0.485621	4.87075	1.11174e-06	0.000115951
F2E4H4	78.0836	2.36514	0.527848	4.48072	7.43927e-06	0.000479298
XP_011692242	370.197	2.36467	0.393818	6.00447	1.91953e-09	1.06423e-06
AT3G60080	13.3396	2.36227	0.526737	4.48472	7.30097e-06	0.000474743
XP_002959884	27.8924	2.36143	0.445453	5.3012	1.15046e-07	2.00312e-05
I3SRD7	245.367	2.35794	0.400894	5.8817	4.06078e-09	1.47504e-06
AT1G19370	3.04236	2.35763	0.931598	2.53073	0.0113824	0.0870942
EFX87672	389.691	2.35531	0.39143	6.0172	1.77459e-09	1.01046e-06
AT5G23740	266.46	2.35165	0.366135	6.4229	1.33699e-10	1.56488e-07
ACU22832	3.05077	2.35084	0.826559	2.84413	0.00445324	0.0486119
XP_002955847	10.2841	2.34861	0.710253	3.30673	0.00094393	0.017203
NP_850990	16.2415	2.34699	0.547386	4.28764	1.80583e-05	0.000943708
E9IPH4	12.0491	2.34689	0.577815	4.06167	4.87225e-05	0.00194779
D5ABY5	5.43993	2.34561	0.90677	2.58678	0.00968779	0.0793247
AT1G27730	1631	2.34344	0.484496	4.83685	1.3191e-06	0.00013297
AT1G51060	25.8775	2.34327	0.538907	4.34818	1.37271e-05	0.000755646
AAM20524	10.1755	2.34251	0.638886	3.66655	0.000245848	0.00647441
XP_013399917	790.766	2.3386	0.38155	6.1292	8.83207e-10	6.20247e-07
AT3G58700	13.1441	2.33787	0.63021	3.70966	0.000207535	0.00568575
F2DFK8	505.047	2.33114	0.391031	5.96151	2.4992e-09	1.15622e-06
XP_015116028	367.372	2.32999	0.393308	5.92408	3.14044e-09	1.32326e-06
XP_014668646	522.466	2.32594	0.382308	6.08396	1.1725e-09	7.26535e-07
XP_001699654	21.253	2.32537	0.691161	3.36445	0.00076697	0.0149478
XP_014211071	175.194	2.32319	0.398988	5.82272	5.78984e-09	2.01626e-06
AT3G62560	13.6034	2.3217	0.473049	4.90796	9.20304e-07	0.000104242
XP_007567459	216.308	2.31656	0.396164	5.84749	4.99052e-09	1.78204e-06
AT5G04970	10.0906	2.3131	0.47887	4.83032	1.36311e-06	0.000135462
EFX60309	315.522	2.31194	0.398546	5.80093	6.59467e-09	2.07368e-06
AT5G40000	138.815	2.30604	0.621063	3.71306	0.000204767	0.00563925
XP_001781995	4.67571	2.30372	0.751983	3.06352	0.00218747	0.03048
XP_012447870	5.26013	2.30358	0.687183	3.3522	0.000801712	0.015397
ACD11917	348.23	2.30248	0.386343	5.95968	2.52731e-09	1.15622e-06
AT1G78900	31.6407	2.30208	0.451286	5.10115	3.3759e-07	4.7669e-05
ABW90402	197.225	2.30194	0.399536	5.76153	8.33569e-09	2.5088e-06
AT2G10260	235.752	2.29534	0.744856	3.08159	0.00205897	0.0295304
Q8ISN9	431.763	2.29507	0.388261	5.91116	3.39709e-09	1.37634e-06
W1P1S2	4.10921	2.29235	0.865325	2.64912	0.00807019	0.07105
XP_005090304	219.535	2.29193	0.398793	5.74717	9.07496e-09	2.6474e-06
AT3G04120	12.7575	2.29133	0.732517	3.12802	0.00175991	0.0263759
AT3G25520	154.846	2.2907	0.304186	7.5306	5.05083e-14	3.54703e-10
AT4G13930	23.8478	2.28956	0.685555	3.33972	0.000838628	0.0157893
C5XWF4	6.36634	2.28459	0.806326	2.83334	0.00460647	0.0497943
XP_005102846	331.762	2.28376	0.382746	5.96677	2.41993e-09	1.15622e-06
AT2G37190	114.279	2.28331	0.584578	3.90592	9.38673e-05	0.00315844
AT1G77640	148.791	2.283	0.579174	3.94182	8.08667e-05	0.00280675
AT2G45030	8.70892	2.28284	0.537259	4.24904	2.14685e-05	0.00106631
XP_013421033	331.674	2.28063	0.386891	5.89476	3.75215e-09	1.43445e-06
XP_014221112	573.083	2.28041	0.393109	5.80096	6.59351e-09	2.07368e-06
AT1G76170	2.88474	2.28021	0.788565	2.89159	0.00383296	0.0443941
F2E3A8	27.572	2.27917	0.461316	4.94059	7.78873e-07	9.11628e-05
G7K7P3	44.1361	2.27346	0.640508	3.54946	0.000386029	0.00908699
AT5G46430	480.195	2.2733	0.380747	5.97063	2.36335e-09	1.15622e-06
AT1G07370	154.2	2.27277	0.399698	5.68622	1.29884e-08	3.33708e-06
AT4G22220	10.2975	2.27006	0.508274	4.46621	7.96157e-06	0.00050198
M5Y710	6.30501	2.26999	0.716023	3.17027	0.00152295	0.0240702
UPI0002BCADA5	2.8749	2.26847	0.893524	2.53879	0.0111236	0.0858431
Q9SWE7	40.6493	2.26833	0.662514	3.42382	0.000617474	0.0127293
AT5G07260	25.0868	2.26729	0.457021	4.96102	7.01223e-07	8.39092e-05
XP_012165298	386.143	2.26718	0.398535	5.68878	1.2795e-08	3.33708e-06
XP_002525964	43.9716	2.26695	0.430105	5.2707	1.35905e-07	2.2906e-05
AFK40342	5.18671	2.26628	0.7277	3.11431	0.00184375	0.0272781
ABV44747	547.026	2.26494	0.404001	5.60627	2.06733e-08	4.63347e-06
XP_002874003	10.8291	2.26356	0.507807	4.45753	8.29102e-06	0.00051679
AT4G27654/AT4G27657	86.1785	2.26346	0.622027	3.63885	0.000273859	0.00702156
F2DK23	11.3781	2.2609	0.529144	4.27275	1.93081e-05	0.000982566
UPI000498FAD0	20.0155	2.26056	0.742487	3.04458	0.00233004	0.0318555
AT1G03100	10.2659	2.26016	0.694248	3.25555	0.00113172	0.0195606
AT1G49240	625.705	2.25676	0.352644	6.39954	1.55849e-10	1.72811e-07
AT5G22250	1522.49	2.24993	0.518531	4.33905	1.43102e-05	0.000779036
AT5G51940	3.96418	2.24765	0.658708	3.41221	0.000644374	0.0131547
KNC27740	595.785	2.24491	0.386167	5.81331	6.12496e-09	2.01626e-06
AT5G67630	16.2889	2.24341	0.474603	4.72692	2.27954e-06	0.000198452
BAJ99763	25.7363	2.24263	0.52785	4.24861	2.15104e-05	0.00106631
ABR23401	473.832	2.2422	0.388959	5.76463	8.18389e-09	2.49881e-06
AT4G27230	159.212	2.24209	0.39037	5.7435	9.27378e-09	2.6474e-06
AT4G19045	10.1185	2.24115	0.634435	3.53251	0.00041164	0.00955113
GAQ83716	58.5169	2.2406	0.604986	3.70357	0.000212589	0.00577913
A8HRZ9	47.4693	2.23564	0.405583	5.51216	3.54449e-08	7.32112e-06
AAO15464	578.683	2.23485	0.397185	5.62673	1.83662e-08	4.36192e-06
NP_564364	86.1782	2.23401	0.59613	3.74751	0.000178596	0.00510614
AT5G48760	588.315	2.23359	0.388468	5.74975	8.93745e-09	2.6474e-06
XP_004074617	344.018	2.23171	0.405904	5.49813	3.83851e-08	7.77593e-06
NP_197839	59.1712	2.23131	0.427929	5.21421	1.846e-07	2.90532e-05
AT5G40650	37.431	2.23071	0.428262	5.20875	1.90116e-07	2.96694e-05
ABO26685	591.863	2.22999	0.383467	5.81534	6.05101e-09	2.01626e-06
AT1G14400	20.0933	2.22923	0.442077	5.04263	4.59183e-07	6.00873e-05
AT4G30220	10.0424	2.22845	0.526174	4.2352	2.28351e-05	0.00111364
C1MSI0	7.76244	2.2245	0.75469	2.94756	0.00320291	0.0394434
AT1G70490	17.2589	2.22361	0.630648	3.5259	0.000422041	0.00969635
AT1G29460	54.3605	2.22333	0.43305	5.13412	2.8347e-07	4.11873e-05
AT5G60860	12.2399	2.21919	0.517318	4.28981	1.78829e-05	0.000939545
Q9LIK5	11.0802	2.21887	0.565023	3.92704	8.59968e-05	0.00295112
ELT90173	430.034	2.21822	0.39497	5.61618	1.95221e-08	4.47057e-06
D8R0P6	9.92485	2.21507	0.591067	3.74758	0.00017855	0.00510614
AT5G28400	24.7997	2.21309	0.445184	4.97118	6.65475e-07	8.10418e-05
AT2G19670	115.141	2.21282	0.39315	5.62843	1.81858e-08	4.36192e-06
AT3G28340	345.351	2.21209	0.498695	4.43576	9.17469e-06	0.000561897
XP_001701670	16.5003	2.20775	0.698375	3.16127	0.00157082	0.0245505
AT5G52470	35.677	2.20301	0.428672	5.13916	2.75973e-07	4.03764e-05
E9IS05	18.5542	2.20298	0.560079	3.93334	8.37724e-05	0.00288385
A0A068X8Z4	24.6228	2.20249	0.475716	4.62984	3.65943e-06	0.000282517
F2DHP8	6.01768	2.20207	0.574816	3.83092	0.000127667	0.00401289
A9S995	21.3124	2.19993	0.599963	3.66677	0.000245632	0.00647441
F2DWF8	30.5683	2.19937	0.449224	4.89594	9.78379e-07	0.000107458
NP_001272941	334.629	2.19902	0.386617	5.68786	1.28643e-08	3.33708e-06
AT1G27530	11.451	2.19794	0.503504	4.36529	1.26955e-05	0.000717074
A0A087SAP7	215.159	2.19582	0.599016	3.66571	0.000246649	0.00648741
AT5G03520	6.56707	2.19512	0.759083	2.89181	0.00383028	0.0443874
BAI40105	1369.72	2.19337	0.385288	5.69279	1.2498e-08	3.33708e-06
F2E117	184.737	2.19232	0.411237	5.33103	9.76552e-08	1.72523e-05
AT4G13940	31.0367	2.19109	0.376659	5.81718	5.98496e-09	2.01626e-06
CAA60020	39.6314	2.19055	0.469137	4.66931	3.02217e-06	0.00024969
E9IHZ0	14.1233	2.18964	0.500697	4.37317	1.22453e-05	0.000697087
F2DF53	45.1735	2.18913	0.603156	3.62946	0.000284019	0.00720216
F2DI67	46.0598	2.18902	0.439825	4.97703	6.4569e-07	7.9552e-05
AT5G25100	28.1729	2.1879	0.447354	4.89075	1.00451e-06	0.000108528
AT4G20320	10.7912	2.18526	0.578391	3.77816	0.00015799	0.00470131
A0A068XNF8	18.8719	2.18318	0.510569	4.27597	1.90309e-05	0.000973469
CAQ37751	409.788	2.18283	0.391004	5.58264	2.36895e-08	5.14527e-06
ATMG01190	31.3714	2.17965	0.587897	3.70754	0.00020928	0.00572612
AT1G07920	934.902	2.17193	0.367764	5.90576	3.51015e-09	1.39532e-06
EPB68923	245.323	2.17156	0.381794	5.68778	1.28702e-08	3.33708e-06
AT4G28950	26.8637	2.16977	0.524232	4.13895	3.48895e-05	0.00151557
EKC36195	265.791	2.16569	0.384051	5.63908	1.70965e-08	4.18825e-06
AT5G60260	61.2714	2.16413	0.838289	2.5816	0.00983427	0.0801055
NP_001191465	708.884	2.16216	0.384823	5.61857	1.92545e-08	4.45773e-06
AFK49397	392.898	2.16033	0.381498	5.66275	1.48966e-08	3.69225e-06
AT5G59910	60.7903	2.1601	0.386889	5.58324	2.36085e-08	5.14527e-06
AT5G46295	43.7363	2.15897	0.504771	4.27712	1.89324e-05	0.000973469
AT2G44840	55.8374	2.15517	0.54014	3.99002	6.60689e-05	0.00241656
AT1G29880	45.5502	2.14991	0.416914	5.15673	2.51304e-07	3.75495e-05
AT2G32000	2.62991	2.14954	0.870571	2.46912	0.0135446	0.0964581
E9J015	3.18265	2.14726	0.759694	2.82648	0.00470629	0.0505105
UPI0004E583EF	106.3	2.14545	0.572473	3.74769	0.000178468	0.00510614
XP_013781715	548.072	2.14493	0.398377	5.38416	7.27827e-08	1.34508e-05
AT5G03340	6.92711	2.14484	0.681444	3.14749	0.00164679	0.0252877
M0T4K3	15.3624	2.14295	0.751232	2.85258	0.00433654	0.047934
AT5G57510	180.444	2.14251	0.464879	4.60875	4.05101e-06	0.000308111
AT2G39460	96.6166	2.13822	0.331221	6.45555	1.07824e-10	1.33625e-07
A9SKK8	113.323	2.13644	0.372005	5.74305	9.29883e-09	2.6474e-06
XP_013399463	428.235	2.13395	0.400373	5.3299	9.82665e-08	1.72523e-05
C1E3N2	11.4759	2.12891	0.713057	2.9856	0.00283018	0.0361591
B4FGR6	8.8976	2.12659	0.747446	2.84515	0.0044391	0.0485833
AT4G05320	242.276	2.12474	0.386928	5.49131	3.98959e-08	8.00501e-06
F2DK36	20.2383	2.12194	0.436137	4.86531	1.14277e-06	0.000118512
ELT98041	561.587	2.12192	0.387593	5.47461	4.38471e-08	8.55344e-06
AT1G15310	17.6689	2.11965	0.462692	4.58113	4.62473e-06	0.000338312
E9J1R7	6.72585	2.11692	0.565667	3.74235	0.000182308	0.00520442
XP_002880547	112.422	2.11366	0.566932	3.72825	0.000192817	0.00541636
NP_199604	63.4025	2.10926	0.594996	3.545	0.000392611	0.00921105
AT5G10980	353.981	2.10349	0.370397	5.67903	1.35464e-08	3.43851e-06
AT3G27300	13.3374	2.10046	0.498351	4.21482	2.49978e-05	0.00119742
AT2G19900	12.3492	2.0952	0.74738	2.80339	0.00505683	0.0530301
NP_177324	70.5743	2.09363	0.617172	3.3923	0.000693088	0.0138785
A4S280	24.5155	2.09276	0.614327	3.40659	0.000657805	0.0133513
AT2G47115	87.1984	2.09191	0.400358	5.22511	1.74055e-07	2.77803e-05
A0A061R9T9	4.64335	2.09001	0.716291	2.91782	0.00352492	0.0418855
AT1G70985	2.58156	2.08831	0.848564	2.46099	0.0138553	0.0974753
AT2G11005	343.055	2.08756	0.428182	4.87541	1.08581e-06	0.00011381
AT4G24570	794.004	2.08737	0.491151	4.24997	2.13804e-05	0.00106631
XM_002863268	74.5615	2.0856	0.411349	5.07016	3.97491e-07	5.4028e-05
M0SX37	3.57745	2.08236	0.84471	2.46517	0.0136948	0.0969495
AT4G07820	23.3075	2.08097	0.730216	2.8498	0.00437473	0.048188
Q9STZ1	7.07211	2.08061	0.839088	2.47961	0.0131525	0.0952223
NP_001291996	202.003	2.08054	0.386079	5.38888	7.08976e-08	1.32183e-05
AT5G63740	105.732	2.08034	0.364887	5.70132	1.18881e-08	3.25269e-06
AT3G63095	32.8179	2.07863	0.455873	4.55967	5.12334e-06	0.000363429
AT5G59820	1141.13	2.07463	0.418091	4.96217	6.97115e-07	8.39092e-05
XP_009012982	525.181	2.07387	0.627471	3.30513	0.000949317	0.0172713
AT5G42280	34.737	2.07347	0.432242	4.79702	1.61041e-06	0.000154923
ADF43157	6.52918	2.07152	0.578153	3.583	0.00033967	0.00827653
EMJ22240	15.1488	2.07144	0.741987	2.79175	0.00524237	0.0542733
NP_175460	5.08951	2.07001	0.777639	2.66192	0.00776972	0.0695676
AT3G09480	93.3862	2.06763	0.365117	5.6629	1.48833e-08	3.69225e-06
AT3G14600	4.02871	2.06719	0.736316	2.80748	0.00499301	0.0525672
Q6H541	113.035	2.06709	0.568513	3.63596	0.00027695	0.00707246
AT1G02140	13.5438	2.06535	0.468652	4.407	1.04814e-05	0.000620289
A4S2V6	119.921	2.06522	0.590021	3.50025	0.000464821	0.0103848
AT1G50010	52.1482	2.06357	0.411955	5.0092	5.46577e-07	6.97896e-05
AT4G21585	66.501	2.0604	0.611847	3.36751	0.000758507	0.0148515
AT2G36880	58.2105	2.06016	0.588874	3.49848	0.000467923	0.010432
F2DEP7	5498.15	2.05717	0.413119	4.97962	6.37107e-07	7.89563e-05
AT2G37610	16.9443	2.0569	0.481199	4.27453	1.91543e-05	0.000977101
AT2G21420	41.3239	2.05582	0.368673	5.57628	2.45719e-08	5.28245e-06
AT5G28060	12.4457	2.05483	0.513288	4.00326	6.24749e-05	0.00232959
AT3G61111	22.8052	2.05308	0.65778	3.12123	0.00180099	0.0268151
AT3G13920	131.301	2.05251	0.353808	5.80121	6.58366e-09	2.07368e-06
AT1G07810	96.7672	2.04867	0.424059	4.83111	1.35775e-06	0.000135462
AT1G43040	4.48919	2.04796	0.796215	2.57212	0.0101077	0.0809998
XP_002953072	9.9839	2.047	0.721135	2.83859	0.00453138	0.0491425
AT1G07940	79.9114	2.04624	0.363951	5.6223	1.88429e-08	4.41092e-06
F2DXE2	3.93464	2.04494	0.692723	2.95203	0.00315688	0.0390541
AT3G20030	7.83217	2.04029	0.653805	3.12064	0.00180456	0.0268493
XP_009047071	77.2553	2.03893	0.417063	4.88879	1.0146e-06	0.000109059
E9IJV9	30.4995	2.03856	0.510599	3.99249	6.53826e-05	0.00240398
D8SIS2	9.89025	2.03624	0.629108	3.2367	0.00120919	0.0204128
F2E697	264.111	2.03455	0.374847	5.42768	5.70928e-08	1.08363e-05
C1FFL8	8.84008	2.03382	0.644416	3.15607	0.00159911	0.0248452
F2DNF3	10.7826	2.03286	0.547673	3.71181	0.00020578	0.00565236
F2DYR9	36.1713	2.02533	0.50434	4.0158	5.92437e-05	0.00224487
XP_004287959	10.256	2.0228	0.451814	4.47706	7.56765e-06	0.000486083
F2E1H9	52.6686	2.02244	0.425536	4.75269	2.00729e-06	0.000179956
AT3G18590/AT1G48940	39.3716	2.02051	0.43918	4.60064	4.21194e-06	0.00031579
AT1G75080	56.3333	2.0181	0.475129	4.24747	2.16195e-05	0.0010692
AT4G15270	3.89893	2.01771	0.704666	2.86335	0.00419184	0.0470756
AT5G53530	5.79313	2.0106	0.575934	3.49102	0.000481186	0.01066
AT3G53750	512.164	2.01036	0.501022	4.01251	6.00775e-05	0.00227238
XM_002887441	44.3968	2.00794	0.44219	4.54091	5.60127e-06	0.000388815
NP_172671	128.165	2.00729	0.583745	3.43864	0.000584638	0.0122681
EXX52668	221.445	2.00696	0.401659	4.99667	5.83301e-07	7.27158e-05
NP_001031632	31.4259	2.00371	0.610931	3.27976	0.00103894	0.0184083
NP_564972	14.9115	2.00308	0.508517	3.93905	8.18045e-05	0.00283463
BAK05907	11.5958	2.00089	0.75083	2.66491	0.00770101	0.0691275
AT4G11380	15.8417	1.9998	0.459993	4.34745	1.37729e-05	0.000755646
AT1G23490	82.7889	1.99807	0.492439	4.0575	4.96013e-05	0.00196373
XM_002886279	12.8676	1.99067	0.534698	3.72298	0.000196883	0.0054766
UPI00053BA0FB	89.7734	1.98879	0.414948	4.79287	1.64413e-06	0.000156256
UPI00053C50CF	27.6687	1.98629	0.661563	3.00243	0.00267835	0.0350097
F2E6H1	3.31647	1.98512	0.745893	2.6614	0.00778162	0.0696149
EMT31104	3.79223	1.98407	0.634813	3.12545	0.00177536	0.026546
ATMG00510	18.0355	1.98162	0.459006	4.3172	1.58018e-05	0.000851439
AT2G47250	12.8362	1.98155	0.470264	4.2137	2.51216e-05	0.00119742
BAK02351	61.7752	1.98113	0.441467	4.48761	7.20276e-06	0.000469807
AT1G15430	4.27605	1.97593	0.682643	2.89453	0.00379726	0.0441993
NP_190955	41.8406	1.96979	0.613821	3.20907	0.00133167	0.0219356
AT3G09680	94.4729	1.96923	0.575566	3.42139	0.000623027	0.0127967
XP_002503077	48.9128	1.96335	0.602762	3.25725	0.00112497	0.0195069
AT5G09810	4.7213	1.9614	0.785853	2.49589	0.0125643	0.0924768
BAJ97742	15.4209	1.95988	0.679869	2.88273	0.00394241	0.0453625
AT1G07510	27.5795	1.95833	0.414151	4.72854	2.26137e-06	0.000197687
AT2G22290	4.67749	1.94944	0.752933	2.58913	0.00962181	0.0790798
XP_002508762	4.23248	1.94886	0.792529	2.45904	0.0139311	0.0978561
NP_181259	36.7789	1.9462	0.63512	3.0643	0.00218178	0.0304207
AT5G08570	47.8529	1.94615	0.394368	4.93485	8.02105e-07	9.28503e-05
XP_002877945	40.8962	1.9453	0.617102	3.15232	0.00161978	0.0250371
AT1G34470	6.01631	1.9439	0.538117	3.61241	0.000303367	0.00756341
AT5G59290	7.40956	1.9399	0.588517	3.29626	0.000979817	0.0177022
AT4G27280	1054.55	1.93913	0.4673	4.14965	3.3298e-05	0.00146762
AT4G20440	28.9918	1.93458	0.410867	4.70853	2.49515e-06	0.000214563
A0A068UCV9	52.0828	1.93103	0.428585	4.50559	6.61889e-06	0.000437137
F2E049	60.6083	1.92994	0.450879	4.2804	1.86561e-05	0.000968093
S8EF71	136.311	1.9258	0.404285	4.76347	1.90289e-06	0.00017355
AT3G25400	8.709	1.92255	0.567021	3.39062	0.00069735	0.0139391
AT5G37420	13.8296	1.92181	0.469934	4.08954	4.32229e-05	0.00177856
XP_002880967	28.2466	1.91746	0.641821	2.98753	0.00281246	0.0360419
AT4G12050	25.0736	1.91658	0.479494	3.99709	6.41261e-05	0.00237019
AT5G59030	21.8136	1.91644	0.525427	3.64739	0.000264913	0.00684807
F2DYK5	33.628	1.91573	0.435263	4.4013	1.07602e-05	0.000632551
E9IK71	9.08195	1.91423	0.595581	3.21406	0.00130872	0.0216592
AT1G52300	72.8133	1.91251	0.571026	3.34925	0.000810302	0.0154633
AT5G52882	10.0202	1.90938	0.47448	4.02415	5.71816e-05	0.00217849
NP_173176	20.8079	1.90865	0.502971	3.79474	0.000147796	0.00448023
AT1G62680	223.442	1.90848	0.364231	5.23974	1.60801e-07	2.62616e-05
XP_002867410	13.5768	1.9063	0.630283	3.02451	0.00249035	0.0332165
AT4G34670	159.705	1.90441	0.388716	4.89924	9.62072e-07	0.000106679
AT5G09510	9.09541	1.90328	0.648942	2.9329	0.00335812	0.0406114
AT4G25470	45.9317	1.89369	0.625485	3.02756	0.00246538	0.0330467
A4S6H8	10.7431	1.89346	0.684107	2.76778	0.00564394	0.0568369
AT5G54640	11.6786	1.88964	0.478821	3.94644	7.93214e-05	0.00276845
AT4G17170	34.5804	1.88661	0.315946	5.97132	2.3534e-09	1.15622e-06
EOA26293	24.5265	1.88616	0.692951	2.72193	0.0064902	0.0616759
AT4G31940/AT4G31950	612.537	1.88102	0.459463	4.09396	4.24063e-05	0.00176564
AT2G27530	52.0036	1.87181	0.445896	4.19785	2.69458e-05	0.00125319
ATMG00770	193.359	1.86955	0.423121	4.41847	9.94034e-06	0.000594952
AT2G28210	118.208	1.8685	0.500457	3.73359	0.000188773	0.00531695
AT3G57490	99.6723	1.86414	0.411376	4.53149	5.85698e-06	0.000398048
AT1G19530	5.32781	1.86371	0.624903	2.9824	0.00285998	0.0364293
F2DL79	25.528	1.86221	0.458388	4.06251	4.85479e-05	0.00194779
AT1G21910	74.5079	1.85901	0.484338	3.83825	0.000123912	0.00395437
AT5G42380	6.1746	1.85548	0.622706	2.97971	0.00288518	0.0366274
AT5G20000	20.2348	1.85534	0.481664	3.85194	0.000117185	0.00376926
F2E834	26.9924	1.84755	0.461082	4.00699	6.14965e-05	0.00230535
AT5G42020	124.197	1.84733	0.359411	5.13989	2.74903e-07	4.03764e-05
UPI00053C9CC1	9.62047	1.84597	0.636266	2.90126	0.00371666	0.0435792
AT5G08500	23.9374	1.8459	0.445458	4.14382	3.41564e-05	0.00149296
NP_189984	4.7574	1.83678	0.680056	2.70092	0.00691478	0.0641764
AT3G09630	106.165	1.83378	0.425037	4.3144	1.60035e-05	0.000857919
AT4G29780	667.936	1.82704	0.514302	3.55247	0.000381629	0.0090339
AT1G06390	69.654	1.82594	0.381775	4.78276	1.72904e-06	0.000160675
EOY05761	6.93045	1.82247	0.613226	2.97193	0.00295931	0.0372887
AT2G40580	7.72699	1.82124	0.692905	2.62841	0.00857848	0.0736176
M8C0C9	4.31966	1.81411	0.699549	2.59326	0.00950702	0.0785466
AT2G25820	8.94127	1.81236	0.533191	3.39908	0.000676131	0.0136183
AT3G02560	76.2827	1.80669	0.658919	2.74191	0.00610835	0.0593318
AT3G10950	12.8088	1.80457	0.511254	3.5297	0.000416031	0.00962187
XP_002873477	23.1437	1.7916	0.479577	3.73579	0.000187124	0.00529131
AT3G46620	982.259	1.79016	0.395815	4.52273	6.1047e-06	0.000409756
E9JD99	3.32017	1.78093	0.725024	2.45638	0.0140347	0.0982288
AT2G30020/AT2G05050	697.323	1.77737	0.447119	3.97516	7.03331e-05	0.00254164
AT3G14290	15.34	1.76838	0.390915	4.52369	6.07719e-06	0.000409756
AT2G28610	3.72171	1.76603	0.63293	2.79024	0.00526691	0.0544739
AT3G53870	67.1073	1.76359	0.553428	3.18666	0.00143926	0.0232533
AT3G60245	46.2706	1.76231	0.38303	4.60097	4.20524e-06	0.00031579
BAJ96807	8.2447	1.7598	0.477751	3.68352	0.000230039	0.00615032
AT5G20150	301.755	1.75047	0.354557	4.93708	7.93021e-07	9.23059e-05
AT1G29100	1479.5	1.74678	0.45612	3.82964	0.000128331	0.00401735
AT3G12915	152.106	1.73135	0.32979	5.24987	1.52206e-07	2.52495e-05
AT5G56950	22.647	1.72845	0.453154	3.81426	0.000136593	0.00418276
AT5G27850	10.9914	1.72814	0.548756	3.14919	0.00163723	0.0252161
CCD74517	11.7153	1.71943	0.458667	3.74875	0.000177719	0.00510614
B8LRU5	16.9457	1.71775	0.628985	2.73099	0.00631443	0.0608084
AT5G47070	472.372	1.71003	0.389325	4.3923	1.12156e-05	0.000649148
M4FEK8	4.40438	1.69731	0.643579	2.6373	0.00835678	0.0724529
AT4G26530	42.4665	1.69628	0.405028	4.18806	2.81347e-05	0.00128067
AT1G52470	5.20525	1.69105	0.579902	2.9161	0.00354442	0.0420935
AT1G02580	4.72773	1.68849	0.598131	2.82294	0.00475858	0.0509419
A9NXH0	4.38864	1.68596	0.675588	2.49554	0.0125765	0.0924768
A0A068UYK6	13.0374	1.68395	0.61015	2.7599	0.00578193	0.0575952
AT1G22840	35.3351	1.68007	0.362885	4.62976	3.66086e-06	0.000282517
AT1G66400	231.28	1.67445	0.402267	4.16254	3.14727e-05	0.001393
AT1G75840	111.569	1.67439	0.463216	3.61469	0.000300704	0.00752912
AT5G45775	85.3113	1.67411	0.297559	5.62616	1.84266e-08	4.36192e-06
AT3G04400	79.7854	1.67346	0.412809	4.05383	5.03864e-05	0.00197469
XP_009766879	3.92606	1.66475	0.679394	2.45034	0.0142723	0.0992369
AT1G04820	494.727	1.6559	0.33769	4.90361	9.40891e-07	0.00010544
A0A023PPH0	12.6447	1.64542	0.516726	3.18433	0.00145092	0.02337
XM_002893126/XM_002893127	1292.24	1.64046	0.463392	3.54011	0.000399957	0.00936254
AT4G23900	55.1515	1.63933	0.419202	3.91061	9.20648e-05	0.00310837
AT1G55520	8.40376	1.63727	0.536554	3.05145	0.00227741	0.0313598
AT1G40129	21.3308	1.62544	0.626792	2.59327	0.00950691	0.0785466
AT3G13610/AT1G55290	1932.32	1.62538	0.500586	3.24696	0.00116645	0.0199795
AT2G40650	6.80009	1.62388	0.597408	2.71821	0.00656363	0.0621179
AT3G55920	166.075	1.62208	0.453055	3.58032	0.00034318	0.00831048
AT5G51280	7.54472	1.62133	0.459511	3.52838	0.000418108	0.00964808
Q52QX8	18.0406	1.60563	0.472704	3.39668	0.00068208	0.0137119
AT3G03280	30.3003	1.59725	0.404306	3.9506	7.79565e-05	0.00273276
AT3G54180	6.32757	1.59602	0.572998	2.78538	0.00534651	0.0549679
AT2G40000	2215.02	1.59557	0.315695	5.05416	4.32282e-07	5.76412e-05
BAJ98849	22.3106	1.5948	0.563517	2.83008	0.00465371	0.0501505
AT1G22740	24.6904	1.59373	0.49128	3.24404	0.00117845	0.0200709
EOA16005	6.29228	1.59168	0.613377	2.59495	0.00946042	0.0784076
AT3G23390	53.1423	1.59062	0.397104	4.00555	6.18726e-05	0.00231533
AT1G35210	170.858	1.58842	0.401721	3.95404	7.68417e-05	0.00272016
AT2G21130	51.6238	1.58698	0.397953	3.98786	6.66732e-05	0.00243023
AT1G73260	4.05158	1.58658	0.589423	2.69175	0.00710787	0.0652473
AT3G53610	22.5846	1.58611	0.429118	3.69621	0.00021884	0.00591852
NP_181874	7.06444	1.58319	0.454071	3.48665	0.00048912	0.0107903
F2DZJ1	52.2196	1.57293	0.52649	2.98757	0.00281204	0.0360419
AT4G09100	30.6588	1.57291	0.58383	2.69412	0.00705743	0.0649567
AT4G31985	5.8534	1.56308	0.52283	2.98966	0.00279289	0.0358565
AT3G04550	597.454	1.55948	0.366377	4.25648	2.07672e-05	0.00104671
AT4G02230	81.3839	1.55905	0.411302	3.79052	0.000150331	0.004531
AT5G13320/AT1G23160	1658.14	1.55783	0.416445	3.74078	0.000183448	0.00522987
AT5G56030	5.82069	1.54673	0.502309	3.07924	0.00207528	0.029624
AT1G11370	9.79681	1.54661	0.537647	2.87663	0.00401943	0.0459226
AT1G22240	20.1614	1.54068	0.459484	3.35306	0.000799233	0.0153633
NP_563682	6.83241	1.5396	0.541587	2.84276	0.00447246	0.0487964
AT3G53770	40.1899	1.53546	0.449357	3.41701	0.000633122	0.0129501
AT5G07090	68.479	1.53328	0.500172	3.06551	0.00217302	0.0303707
AT1G07770	58.0436	1.53308	0.404128	3.79355	0.000148506	0.0044953
AT5G52640	172.77	1.5312	0.247455	6.18778	6.10156e-10	4.76102e-07
GAQ91748	12.12	1.52922	0.477972	3.19938	0.00137722	0.0225135
AT5G11590/AT2G35700	61.5155	1.52039	0.357442	4.25354	2.10419e-05	0.0010555
AT2G31610	95.4972	1.51891	0.343745	4.41872	9.92872e-06	0.000594952
AT2G34250	35.8204	1.51793	0.381973	3.97392	7.06981e-05	0.00255046
AT5G37770	583.221	1.51071	0.35632	4.23974	2.23775e-05	0.00109639
AT3G17020	27.4806	1.50421	0.423042	3.55571	0.000376965	0.00896376
AT3G43810	65.7259	1.50391	0.361066	4.16518	3.11104e-05	0.00138938
AT1G15010	219.609	1.50236	0.368976	4.07171	4.6669e-05	0.00189099
AT1G21750	34.6741	1.49952	0.39606	3.7861	0.00015303	0.0045861
AT1G76030	16.8984	1.49705	0.424786	3.52425	0.000424683	0.00974642
AT5G59240	72.9169	1.49586	0.371571	4.02577	5.67897e-05	0.00217849
AT5G65205	17.2091	1.49443	0.349216	4.27937	1.87419e-05	0.000970159
EOY15501	22.0765	1.49428	0.534821	2.79398	0.00520634	0.0540331
AT1G59590	1010.97	1.48515	0.322383	4.6068	4.08908e-06	0.000309888
AT1G74710	2299.98	1.47975	0.391876	3.77605	0.000159334	0.00472823
AT2G07698	176.51	1.479	0.3319	4.45616	8.34416e-06	0.000518522
AT5G06320/AT2G35460	2154.23	1.47485	0.344791	4.27752	1.88987e-05	0.000973469
AT1G32928/AT1G32920	106.769	1.47184	0.332485	4.42679	9.56459e-06	0.000580711
AT1G12672/AT1G12663	8.94795	1.46472	0.519059	2.82188	0.00477433	0.0510328
AT2G29950	15.4691	1.46269	0.417288	3.50523	0.000456208	0.0102358
AT2G20140	15.3708	1.4603	0.386189	3.78132	0.000156001	0.00465527
AT5G65300	234.118	1.45461	0.373256	3.89708	9.73603e-05	0.00323149
AT3G49960	492.219	1.45227	0.494194	2.93865	0.0032964	0.0401669
AT1G58420	141.512	1.44839	0.398462	3.63496	0.000278023	0.00708179
A0A087HCJ2	16.2831	1.44798	0.438257	3.30395	0.000953328	0.0173026
AT4G33880	92.2501	1.44211	0.4528	3.18488	0.00144813	0.0233429
AT3G27360	101.323	1.44032	0.386774	3.72395	0.000196132	0.00547298
KMZ75263	8.48925	1.44031	0.525983	2.73833	0.00617524	0.0598436
NP_001118356	12.1556	1.43538	0.481502	2.98106	0.00287256	0.0365453
AT3G11940	95.4258	1.43333	0.350386	4.09072	4.30044e-05	0.0017765
AT2G27080	1042.11	1.42398	0.366249	3.88801	0.00010107	0.00334277
AT1G09690	98.3331	1.41493	0.380349	3.72008	0.000199163	0.00551376
AT1G19910	14.4126	1.41464	0.473579	2.98712	0.00281617	0.0360448
AT3G12110	125.029	1.41219	0.36557	3.86298	0.000112011	0.00363611
AT5G10040	13.2639	1.40801	0.557848	2.52401	0.0116026	0.0880244
AT1G07135	269.684	1.39197	0.359804	3.86868	0.000109426	0.00355771
AT2G20970	7.51688	1.38287	0.545485	2.53513	0.0112407	0.0864617
AT1G20860	10.8063	1.38065	0.399202	3.45853	0.000543139	0.0116047
CBJ29820	274.596	1.37793	0.351255	3.92286	8.75046e-05	0.00299277
AT1G76650	1127.96	1.37617	0.363194	3.78908	0.000151206	0.00455088
AT2G46400	746.195	1.3761	0.323189	4.25787	2.06385e-05	0.00104522
AT5G51870	77.1092	1.37396	0.36971	3.71632	0.000202148	0.00557443
V4TML0	143.446	1.36841	0.469363	2.91545	0.00355171	0.0421564
AT4G29390	145.55	1.36809	0.409171	3.34357	0.000827086	0.0156549
AT1G53625	19.3567	1.36474	0.514815	2.65094	0.00802689	0.0707871
AT4G35020	41.7163	1.36147	0.400795	3.39693	0.000681465	0.0137119
NP_199970	18.0797	1.35372	0.549502	2.46354	0.0137572	0.0971956
AT3G60420	373.811	1.35287	0.367675	3.67954	0.000233654	0.00621544
F2E082	256.359	1.34896	0.393645	3.42684	0.000610641	0.0126874
AT4G17785	52.2325	1.34022	0.374285	3.58074	0.000342626	0.00831048
AT5G38540	21.3263	1.33737	0.456955	2.92669	0.0034259	0.0411379
NP_566135	21.0444	1.33527	0.494189	2.70194	0.00689356	0.0641095
AT5G60400	618.292	1.33507	0.292529	4.56388	5.02164e-06	0.000359047
AT5G13490	159.094	1.33433	0.260481	5.12257	3.01401e-07	4.31967e-05
AT1G72240	34.6084	1.33245	0.429006	3.10589	0.00189705	0.0277671
AT1G06970/AT2G30240	4.76739	1.33148	0.485356	2.7433	0.00608257	0.0591632
AT4G37070/AT4G37060	1100.17	1.33067	0.336079	3.95938	7.51443e-05	0.00267422
AT3G56710	126.05	1.33038	0.364418	3.65069	0.000261537	0.00677743
AT1G23410/AT5G08060	358.559	1.33001	0.419662	3.16925	0.00152835	0.0241193
AT2G44370/AT2G17740	218.31	1.32537	0.414501	3.1975	0.00138622	0.022622
AT4G37030/AT4G12680	241.491	1.32164	0.344499	3.83639	0.000124855	0.00396749
AT1G21550	122.879	1.32128	0.322821	4.09291	4.25999e-05	0.00177021
AT1G62935	12.8806	1.31615	0.456099	2.88566	0.00390596	0.0450909
AT4G08620	2790.56	1.31177	0.366669	3.57752	0.000346864	0.00838043
D8SY09	67.3	1.31068	0.518944	2.52568	0.0115476	0.0877967
AT4G28390	146.243	1.30325	0.440498	2.95857	0.00309067	0.0384836
NP_189996	161.578	1.29856	0.414021	3.13646	0.00170999	0.0258808
AT2G37780	87.1032	1.29671	0.469798	2.76015	0.00577756	0.0575788
AT2G43670/AT2G43660	13.3427	1.29389	0.467256	2.76912	0.00562086	0.0567147
AT2G06420	48.6581	1.28484	0.333087	3.85735	0.000114621	0.00371513
AT4G11040	28.8126	1.27361	0.434437	2.93163	0.00337185	0.0406862
AT1G21520	587.59	1.273	0.40952	3.10852	0.00188026	0.027663
AT5G44610	24.4127	1.27073	0.42425	2.99524	0.0027423	0.0354562
AT3G44755	50.7642	1.2613	0.456172	2.76497	0.00569284	0.0570855
AT3G50870	25.9237	1.25826	0.355967	3.53476	0.000408146	0.00951196
NP_179566	27.6065	1.25651	0.483373	2.59946	0.00933718	0.0777532
AT1G60050	381.085	1.25607	0.496008	2.53236	0.0113299	0.0869157
AT2G36050	10.8353	1.25027	0.362502	3.449	0.00056266	0.0119377
AT5G02960	104.429	1.24583	0.331511	3.75803	0.000171254	0.00494923
AT2G38730	20.1625	1.24482	0.417432	2.98209	0.00286287	0.0364441
AT3G28210	387.45	1.24356	0.361513	3.43989	0.000581949	0.0122238
AT3G12860	50.8839	1.24001	0.368077	3.36889	0.000754704	0.0148184
AT1G70430	24.8655	1.2384	0.489678	2.52901	0.0114383	0.0872495
AT1G30720	18610.7	1.23747	0.420648	2.94182	0.00326287	0.0398505
AT2G42060	199.57	1.23517	0.277621	4.44913	8.6217e-06	0.000529568
AT1G13950	25.1477	1.23447	0.3766	3.27793	0.00104572	0.0184671
AT2G23030	578.741	1.23122	0.281573	4.37264	1.22754e-05	0.000697087
AT3G02040	237.759	1.23046	0.275397	4.46793	7.89787e-06	0.000499676
AT1G17710	30.5761	1.23023	0.49073	2.50694	0.0121783	0.0907257
AT2G27389/AT2G27390	263.486	1.22911	0.373744	3.28863	0.00100678	0.0180211
AT1G30750	680.4	1.22906	0.374313	3.2835	0.00102525	0.0182625
XP_009039150	165.622	1.22878	0.377382	3.25606	0.00112971	0.0195569
AT2G18450	34.2669	1.22767	0.45996	2.66907	0.00760621	0.0684436
AT2G36690/AT2G06960	2665.48	1.22724	0.281476	4.36001	1.30056e-05	0.000728728
AT2G44380	326.694	1.22479	0.294067	4.16501	3.11338e-05	0.00138938
AT2G21900	663.368	1.22329	0.344698	3.54889	0.000386865	0.00909651
A9T4H6	22.8556	1.21778	0.491109	2.47965	0.0131511	0.0952223
AT5G07570	42.524	1.21087	0.483497	2.5044	0.0122658	0.0911519
AT1G54095	89.0924	1.21081	0.285274	4.24438	2.19202e-05	0.00107901
AT4G02270	1084.18	1.20745	0.462336	2.61163	0.00901122	0.0761316
XP_009831602	186.084	1.20697	0.344238	3.50621	0.00045453	0.0102125
AT5G43170	152.61	1.20583	0.299634	4.02437	5.71291e-05	0.00217849
AT2G37430	159.526	1.2037	0.296101	4.06518	4.79964e-05	0.00192975
AT1G33920	68.5913	1.20332	0.359942	3.34309	0.000828516	0.0156549
AT5G26170	161.49	1.20199	0.370849	3.24118	0.00119034	0.0202242
AT1G55790	121.892	1.19842	0.367234	3.26337	0.00110096	0.0191694
AT1G61580	166.522	1.19654	0.283962	4.21372	2.51195e-05	0.00119742
AT4G18330	21.1791	1.19179	0.378446	3.14917	0.00163734	0.0252161
AT1G09080	124.436	1.19107	0.381063	3.12565	0.00177413	0.026546
AT1G05250/AT1G05240	3614.4	1.18719	0.468845	2.53215	0.0113364	0.0869157
ATCG00480	196.941	1.18565	0.417995	2.83652	0.00456077	0.0494272
AT1G60130	143.478	1.18551	0.381853	3.10461	0.00190528	0.0278173
AT1G74830	41.7485	1.18344	0.459735	2.57418	0.0100477	0.0806852
AT1G35160	28.0687	1.18008	0.449655	2.62441	0.00867989	0.0742457
AT2G42470/AT2G42460	22.2355	1.17845	0.409062	2.88087	0.00396582	0.0456069
AT1G09100	13.0406	1.17765	0.332011	3.54704	0.000389593	0.00915043
AT1G13180	90.8038	1.17694	0.32149	3.66089	0.000251345	0.00658625
CBJ30820	58.3407	1.17381	0.407782	2.87852	0.00399543	0.045698
I1IB33	50.5383	1.16918	0.441103	2.65058	0.00803532	0.0708318
CBN74847	75.8018	1.16768	0.442255	2.64029	0.00828342	0.0720839
AT1G49000	112.572	1.16763	0.250258	4.6657	3.07568e-06	0.000251292
AT1G18740	917.534	1.16544	0.325658	3.57874	0.000345259	0.00835122
AT3G19580	706.425	1.16145	0.28655	4.05321	5.05202e-05	0.00197469
AT2G43261	40.1003	1.15616	0.432383	2.67392	0.00749701	0.0677884
XM_002886273	14.8231	1.15565	0.460467	2.50975	0.0120818	0.0901662
AT3G58060	210.321	1.15561	0.345531	3.34446	0.000824441	0.015634
AT1G02430	60.4111	1.14982	0.305694	3.76136	0.000168994	0.00492444
AT1G30190	37.166	1.1484	0.40416	2.84144	0.00449104	0.0489231
XP_002975494	186.66	1.14312	0.451243	2.53327	0.0113005	0.0867638
D8QWN3	23.1197	1.13806	0.379113	3.00191	0.00268287	0.0350203
AT3G61190	12.6908	1.1348	0.316542	3.58499	0.000337086	0.00824822
AT2G44340	159.732	1.13393	0.304266	3.72679	0.000193934	0.00542949
AT4G19370	82.7204	1.13332	0.35942	3.15319	0.00161496	0.0250136
AT5G19700	62.4784	1.13265	0.36512	3.10214	0.00192126	0.0279732
AT1G76200	802.045	1.13104	0.441129	2.56396	0.0103486	0.082242
AT2G36295	19.6392	1.12882	0.379291	2.97613	0.00291909	0.0369144
AT2G21880	58.9341	1.12843	0.247744	4.55484	5.2426e-06	0.00036817
D8TMT7	57.4219	1.12685	0.407383	2.76608	0.00567353	0.0570005
AT5G42910	28.899	1.12357	0.451454	2.48877	0.0128185	0.0937056
AT4G33650	26.7791	1.12298	0.311654	3.60329	0.000314217	0.00779732
AT5G35530	51.3439	1.12175	0.411676	2.72484	0.00643333	0.0613847
AT4G19800	16.1518	1.12132	0.426083	2.63168	0.00849628	0.0732003
AT4G33730	65.1649	1.11791	0.413779	2.70171	0.00689842	0.0641095
P31692	243.015	1.1165	0.451525	2.47272	0.0134087	0.0960238
CBN76630	210.503	1.11405	0.367317	3.03295	0.00242179	0.0326647
AT5G17820	1625.51	1.11361	0.429216	2.59451	0.00947246	0.0784765
I3SUP3	68.6769	1.11142	0.441755	2.51592	0.0118722	0.089338
AT1G57860	56.152	1.10877	0.26212	4.23	2.33691e-05	0.00113203
AT1G54340	52.2862	1.10797	0.252483	4.38831	1.14232e-05	0.000659355
AT5G11920	1320.57	1.10256	0.318027	3.46689	0.000526519	0.0114005
AT1G73066	37.0056	1.10201	0.328196	3.35777	0.000785745	0.0152046
AT5G02780	237.445	1.10124	0.307109	3.58584	0.000336001	0.00823125
AT3G21710	549.835	1.10089	0.298942	3.68264	0.000230835	0.0061638
AT3G28510	12.4156	1.10079	0.397222	2.77122	0.00558465	0.0564599
A8I0I1	61.675	1.09883	0.382508	2.87271	0.00406972	0.0463214
AT5G46090	125.894	1.09682	0.4057	2.70352	0.00686085	0.0638729
AT3G04770	141.832	1.09567	0.31751	3.45083	0.000558864	0.0118931
AT2G18020	110.854	1.09501	0.339926	3.22133	0.00127596	0.0212337
AT3G47480	87.6887	1.09004	0.284584	3.83028	0.000127998	0.00401289
AT4G11890	239.316	1.08627	0.291157	3.73087	0.000190819	0.00536739
AT3G53820	160.607	1.08125	0.3186	3.39375	0.000689426	0.0138332
AT4G17490	166.567	1.0799	0.278419	3.87871	0.000105014	0.00345152
AT1G10220	55.1425	1.07888	0.316897	3.40452	0.0006628	0.013401
AT2G37810	74.1916	1.07854	0.38124	2.82904	0.00466884	0.0502879
AT4G10720	456.878	1.07437	0.266717	4.02814	5.62199e-05	0.00217251
AT2G37800	178.038	1.07334	0.358162	2.9968	0.00272834	0.0353872
AT3G52820/AT3G52810	154.692	1.06139	0.404802	2.622	0.0087415	0.0746216
AT5G41570	59.0691	1.06025	0.272064	3.89706	9.73656e-05	0.00323149
AT1G76180	19.648	1.06006	0.28452	3.72579	0.000194707	0.00544045
AT1G07930	129.582	1.05956	0.349778	3.02924	0.00245166	0.0328991
AT5G03495	1777.38	1.05529	0.421411	2.50419	0.0122733	0.0911597
AT5G12880	222.859	1.05478	0.266505	3.95781	7.56403e-05	0.00268733
AT3G50930	1572.92	1.05168	0.34167	3.07806	0.00208355	0.0296562
AT5G57560	952.34	1.05167	0.363443	2.89362	0.00380829	0.0442706
AT4G31875	979.95	1.04095	0.374835	2.77709	0.0054848	0.0558231
AT3G45730	104.402	1.04043	0.324274	3.2085	0.0013343	0.0219537
AT3G06420	317.244	1.04027	0.354779	2.93216	0.00336612	0.0406637
AT5G47230	163.559	1.03973	0.288753	3.60077	0.000317278	0.00786113
AT2G42760	282.013	1.03672	0.291641	3.55479	0.000378279	0.00898488
AT4G33710	21245.7	1.0302	0.374982	2.74733	0.00600833	0.0587122
AT2G18690	2668.7	1.03007	0.269388	3.82374	0.000131443	0.00406645
AT3G52400	901.547	1.02706	0.2756	3.72663	0.000194058	0.00542949
AT1G69690	148.203	1.0264	0.336489	3.05031	0.00228604	0.0314375
AT1G30560	393.292	1.02244	0.370625	2.75868	0.00580352	0.0576467
AT5G42655	50.8646	1.021	0.301199	3.38979	0.000699467	0.0139681
AT2G39650	158.687	1.0208	0.285917	3.57025	0.000356641	0.00856751
AT5G41040	2533.82	1.01659	0.241793	4.20439	2.61783e-05	0.00123383
AT3G46090/AT3G46080	54.7255	1.012	0.340301	2.97384	0.00294096	0.0371018
AT1G11510/AT2G20613	24.3943	1.00773	0.409143	2.46302	0.0137772	0.0972513
AT1G69900	347.618	1.00138	0.287755	3.47996	0.000501481	0.0109569
AT3G26340	15.7985	1.00117	0.403726	2.47982	0.0131448	0.0952223
AT2G23830	11.6863	1.00089	0.382391	2.61744	0.00885911	0.0753203
AT1G33910	100.316	0.999725	0.363667	2.74902	0.00597746	0.0585431
AT2G22630	84.6817	0.995654	0.29069	3.42514	0.000614473	0.0127042
AT4G01360	1183.77	0.995332	0.300296	3.3145	0.000918057	0.0168182
AT5G59850	24.0167	0.99255	0.367329	2.70207	0.00689084	0.0641095
AT1G71740	60.8586	0.990158	0.320272	3.09161	0.00199072	0.0288449
AT2G39518/AT2G39520	124.729	0.987648	0.280015	3.52713	0.000420095	0.00967275
AT5G08240	1017.42	0.987245	0.235408	4.19376	2.74365e-05	0.00126761
AT2G36430	30.6039	0.986795	0.312634	3.15639	0.00159734	0.0248359
AT1G72900	469.412	0.985699	0.274135	3.59567	0.000323554	0.00797267
XM_002870267	465.534	0.981582	0.3619	2.7123	0.00668175	0.0627323
AT3G01080	151.858	0.981457	0.383789	2.55728	0.0105493	0.0831783
AT2G30910	262.053	0.980414	0.329201	2.97816	0.00289986	0.0367385
AT5G64100	2021.92	0.97935	0.371255	2.63795	0.00834101	0.0723758
AT5G47740	611.804	0.977742	0.278128	3.51544	0.000439028	0.0099795
AT2G40080	55.678	0.976672	0.318137	3.06997	0.00214078	0.0301282
AT2G20500	24.4476	0.975368	0.357951	2.72486	0.00643287	0.0613847
AT1G20030	15.8714	0.975097	0.365288	2.66939	0.0075989	0.0684161
AT4G15740	205.294	0.974547	0.357433	2.72651	0.00640073	0.0612122
AEC07622	87.1255	0.974341	0.3317	2.93742	0.00330957	0.0402807
AT1G01670	1191.39	0.973845	0.333653	2.91874	0.00351451	0.041809
AT3G55230	2118.03	0.973237	0.273873	3.5536	0.000379993	0.00900528
AT1G61260	292.061	0.971669	0.302165	3.21569	0.00130131	0.0215703
AT5G22890	79.112	0.970755	0.212592	4.56628	4.96458e-06	0.000359047
AT1G19770	2337.39	0.970492	0.239361	4.05452	5.02378e-05	0.00197465
AT1G28370	392.793	0.970309	0.32421	2.99284	0.00276396	0.0356153
AT1G58380	21.6564	0.969908	0.365835	2.65121	0.00802028	0.0707585
AT1G35330	83.5064	0.962688	0.357645	2.69174	0.00710799	0.0652473
AT2G44578	97.0169	0.959875	0.324765	2.9556	0.00312062	0.0387421
AT1G17615	23.072	0.958259	0.37146	2.57971	0.00988823	0.0801868
AT1G30730	329.261	0.954038	0.381541	2.50049	0.0124023	0.0916172
AT4G11280	660.495	0.952699	0.286297	3.32766	0.000875772	0.0162208
AT2G34180	282.285	0.948135	0.262099	3.61747	0.000297501	0.00747518
AT1G13510	2350.27	0.945719	0.240245	3.93648	8.26842e-05	0.00286041
AT5G66670/AT5G66660	823.225	0.945386	0.2918	3.23984	0.00119597	0.0202872
AT3G51642	70.9884	0.94355	0.312358	3.02073	0.00252163	0.0335171
AT5G22530/AT5G22520	42.1121	0.942618	0.348904	2.70166	0.00689948	0.0641095
AT5G02400	835.698	0.941039	0.274112	3.43304	0.000596847	0.0124622
AT1G56300	217.22	0.940975	0.339992	2.76764	0.00564646	0.0568369
AT5G07475	588.768	0.940465	0.299084	3.14448	0.00166382	0.025401
AT3G28580	13573.3	0.940289	0.264099	3.56037	0.000370332	0.00881599
AT5G05410	427.15	0.940191	0.30157	3.11766	0.00182296	0.0270275
AT5G57620	683.426	0.937947	0.213928	4.38441	1.16303e-05	0.000669474
AT1G62840	1454.52	0.934394	0.22744	4.1083	3.98575e-05	0.00167608
AT5G47590	71.1793	0.931512	0.313798	2.96851	0.00299249	0.0375625
AT2G27370	215.172	0.927423	0.250652	3.70005	0.000215558	0.00584477
AT2G03770	11.8673	0.925912	0.372209	2.48761	0.0128605	0.0939023
AT4G34920	477.413	0.92567	0.237535	3.89698	9.73987e-05	0.00323149
AT5G45240	253.733	0.925466	0.28496	3.2477	0.00116342	0.01996
AT1G08670	563.151	0.924921	0.236193	3.91595	9.00503e-05	0.00305504
AT5G61550	77.1374	0.924744	0.37472	2.46783	0.0135936	0.0965901
AT3G16510/AT4G15755	568.622	0.92421	0.266471	3.46833	0.000523698	0.0113511
AT1G05880	368.094	0.924163	0.323617	2.85573	0.00429375	0.047709
AT1G67600	37.442	0.92315	0.275116	3.3555	0.000792228	0.0152845
AT1G70420	261.866	0.921062	0.263591	3.49429	0.000475327	0.0105635
AT2G34600	41.112	0.919712	0.321901	2.85712	0.00427501	0.0475784
AT3G16210	26.6332	0.916331	0.369082	2.48273	0.0130379	0.0947505
AT3G01290	6789.55	0.914456	0.220714	4.14318	3.42526e-05	0.00149406
AT4G39030	1399	0.914035	0.32016	2.85494	0.00430456	0.0477559
AT1G66160	168.752	0.913206	0.299335	3.05078	0.00228246	0.0314088
AT2G20562	79.0662	0.910319	0.281004	3.23953	0.00119727	0.0202929
AT3G52790	145.092	0.904677	0.288594	3.13478	0.00171984	0.0259553
AT1G33890	61.9297	0.90344	0.3415	2.64551	0.00815689	0.0714327
AT3G20600	186.956	0.902139	0.262139	3.44145	0.000578595	0.0121777
AT5G06090	71.7142	0.901531	0.313664	2.87419	0.00405062	0.0462039
AT4G24310	544.156	0.899669	0.239285	3.75983	0.000170032	0.00493858
AT1G66580	711.525	0.899228	0.23489	3.82829	0.000129035	0.00402743
AT3G25600	262.659	0.899182	0.276398	3.25321	0.00114108	0.0196823
AT2G45760	162.683	0.898523	0.354283	2.53618	0.011207	0.0862345
AT5G16770	81.9496	0.891899	0.256311	3.47976	0.000501871	0.0109569
AT5G66670	242.633	0.891676	0.353603	2.52169	0.0116793	0.088447
AT1G67970	184.03	0.891056	0.223039	3.99507	6.46746e-05	0.00238211
AT4G18550	75.1693	0.890858	0.289438	3.07789	0.00208472	0.0296562
AT2G28670	1988.36	0.887894	0.275092	3.22763	0.00124822	0.0209042
AT5G40510	182.169	0.887013	0.262428	3.38003	0.000724779	0.0143698
AT2G36750	367.997	0.88657	0.31941	2.77565	0.00550916	0.0560169
AT4G23810	233.704	0.88656	0.285469	3.10563	0.00189876	0.0277671
AT5G62480	338.945	0.885728	0.295231	3.00012	0.0026987	0.035205
AT1G55130	38.3429	0.885358	0.330019	2.68275	0.00730196	0.0665964
AT4G36500	263.919	0.884261	0.288545	3.06455	0.00217998	0.0304157
AT1G17147	63.074	0.881415	0.333147	2.64572	0.00815161	0.0714327
AT1G02610	35.1004	0.879455	0.299626	2.93518	0.00333353	0.0404789
AT3G61410	88.0667	0.878534	0.30517	2.87883	0.00399154	0.0456783
AT1G55420	326.343	0.877824	0.261082	3.36226	0.000773078	0.0150529
AT2G26410	250.835	0.877131	0.296327	2.96001	0.00307629	0.0383272
AT2G37820	74.0184	0.87706	0.29735	2.94959	0.00318194	0.0392718
AT1G77145	674.558	0.876505	0.178241	4.91752	8.76471e-07	0.000100071
AT5G24470	457.947	0.87641	0.274249	3.19567	0.00139506	0.0226608
AT5G44690	52.845	0.875979	0.340251	2.5745	0.0100384	0.0806852
AT2G22510	1093.42	0.875646	0.285166	3.07065	0.00213592	0.0300855
AT3G01760	54.8865	0.875614	0.316489	2.76665	0.0056636	0.0569822
AT1G35180/AT1G35170	18.3457	0.875521	0.30765	2.84583	0.00442958	0.0485444
AT2G38490	80.0295	0.87477	0.353865	2.47204	0.0134344	0.0960247
AT2G32830	11.5181	0.873802	0.335353	2.60562	0.00917094	0.0769208
AT5G18270	725.727	0.873101	0.251955	3.4653	0.000529638	0.0114276
AT4G26460	157.52	0.872271	0.335981	2.59619	0.00942631	0.0782172
AT5G64810	325.233	0.86968	0.28083	3.09682	0.00195608	0.0284016
AT1G68050	187.599	0.869294	0.348982	2.49094	0.0127406	0.0932334
AT3G56880	1191.82	0.868993	0.282964	3.07104	0.00213312	0.0300807
AT1G74450	591.032	0.868717	0.291697	2.97815	0.00289995	0.0367385
AT5G49480	116.749	0.867835	0.226562	3.83046	0.000127906	0.00401289
AT2G35930	1574.78	0.865378	0.240345	3.60056	0.000317535	0.00786113
AT4G04990	291.098	0.864988	0.237539	3.64147	0.00027109	0.00699062
AT5G53590/AT5G53588	842.512	0.864848	0.189487	4.56416	5.01488e-06	0.000359047
AT5G13850	26.5694	0.864792	0.32693	2.64519	0.0081645	0.0714327
AT1G64070	43.4813	0.860584	0.299722	2.87127	0.00408825	0.046482
AT3G02940	94.7871	0.857557	0.280263	3.05983	0.00221463	0.0307769
AT5G13080/AT3G01970	347.414	0.857407	0.267562	3.20451	0.00135291	0.0222064
AT1G35140	1984.64	0.85412	0.344865	2.47668	0.0132611	0.0955228
AT1G16110	119.656	0.852743	0.309027	2.75945	0.00578996	0.05761
AT4G02090	99.0895	0.852148	0.259703	3.28124	0.00103352	0.0183593
AT3G50400	287.788	0.850088	0.248139	3.42586	0.000612865	0.012696
AT2G37530	26.5365	0.846294	0.21671	3.9052	9.41476e-05	0.00315844
AT3G22620	1517.33	0.844844	0.205436	4.11244	3.91494e-05	0.0016496
AT1G23140	693.127	0.844824	0.178303	4.73814	2.15686e-06	0.000190927
AT3G52450	1897.22	0.84001	0.333757	2.51683	0.0118415	0.0892905
AT2G14210	4575.9	0.839092	0.28531	2.94098	0.00327173	0.0399124
AT1G03850	1109.3	0.83904	0.192306	4.36305	1.2826e-05	0.000720584
AT2G34000	151.543	0.837968	0.224325	3.73551	0.000187338	0.00529131
AT5G59550	308.682	0.836902	0.243951	3.43061	0.000602226	0.0125496
AT4G27470	303.786	0.833608	0.238043	3.50192	0.000461911	0.0103307
AT1G61590	990.739	0.833456	0.20786	4.0097	6.07957e-05	0.00228722
AT4G03960	106.522	0.833123	0.207757	4.01007	6.06997e-05	0.00228722
AT2G26480	1150.6	0.831879	0.29785	2.79294	0.0052231	0.054127
AT5G06470	26.7232	0.83149	0.335733	2.47664	0.0132624	0.0955228
AT5G65500	358.692	0.83038	0.250403	3.31617	0.000912608	0.0167627
AT2G23540	1278.06	0.830159	0.264992	3.13278	0.00173161	0.0260769
AT5G23190	404.02	0.829703	0.282644	2.93551	0.00333005	0.0404789
AT5G66790	97.335	0.829608	0.209859	3.95317	7.71218e-05	0.00272161
AT4G20000	154.697	0.82946	0.329785	2.51515	0.0118981	0.0894336
AT3G47820	163.916	0.828184	0.255372	3.24305	0.00118257	0.0201247
AT1G64740	256.543	0.827889	0.317492	2.60759	0.00911822	0.0767634
AT5G40690	275.506	0.827843	0.305964	2.70568	0.00681642	0.0635716
AT2G04230	627.24	0.827743	0.325315	2.54444	0.0109454	0.0850599
AT5G25120	894.375	0.827092	0.215786	3.83292	0.000126629	0.00400365
AT3G25950	205.66	0.822367	0.272826	3.01425	0.00257612	0.0340701
AT1G70170	355.42	0.817709	0.31467	2.59862	0.00935995	0.0778813
AT1G68450	376.333	0.817541	0.240339	3.40162	0.000669875	0.0135052
AT4G23880	103.748	0.816139	0.24627	3.31401	0.000919694	0.0168195
AT5G46060	34.0199	0.815663	0.276955	2.94511	0.0032284	0.0396387
AT5G06290	31.5147	0.814507	0.308239	2.64246	0.00823072	0.0718926
AT1G03920	13.9624	0.813944	0.270097	3.01352	0.00258234	0.0341096
AT4G10500	2597.11	0.813509	0.231804	3.50948	0.000448989	0.0101386
AT4G13580/AT3G24020	560.821	0.812137	0.278824	2.91273	0.0035829	0.0423972
AT5G66390	3910.49	0.809902	0.198324	4.08373	4.43183e-05	0.00181301
AT1G52200	725.302	0.808443	0.244788	3.30262	0.000957854	0.0173637
AT3G15210/AT1G80580	664.869	0.807345	0.230507	3.50248	0.000460956	0.0103203
AT3G04530	250.567	0.805564	0.234315	3.43795	0.000586126	0.0122749
AT4G33985/AT2G15590	116.145	0.805263	0.245249	3.28345	0.00102547	0.0182625
AT4G25390	121.731	0.8052	0.202045	3.98524	6.74116e-05	0.0024529
AT3G16720	313.073	0.803297	0.211816	3.79244	0.000149177	0.00450913
AT4G33610	564.803	0.801796	0.227903	3.51815	0.00043457	0.00994085
AT5G22920	2850.11	0.801763	0.210177	3.8147	0.000136348	0.00418135
AT1G22150	1718.23	0.801148	0.279583	2.86551	0.0041634	0.0469313
AT4G39670	152.262	0.799034	0.280772	2.84584	0.00442941	0.0485444
AT1G51620	147.795	0.798687	0.261104	3.05889	0.00222161	0.030813
AT5G49770	195.061	0.798447	0.247421	3.22708	0.00125059	0.0209106
AT5G64510	396.301	0.798214	0.235538	3.38889	0.000701752	0.0139872
AT3G06390	643.39	0.797028	0.223665	3.56349	0.000365951	0.00872956
AT1G14870	8441.66	0.796693	0.245179	3.24943	0.00115636	0.0199037
AT3G09020	274.189	0.795631	0.229809	3.46215	0.000535888	0.011497
AT3G25510	22.8007	0.795226	0.314849	2.52574	0.0115454	0.0877967
AT1G51640	112.953	0.795168	0.267877	2.9684	0.00299351	0.0375625
AT4G26200	11.0886	0.793532	0.303995	2.61035	0.00904499	0.0763155
AT3G11430/AT3G11325	470.136	0.792752	0.249326	3.17958	0.00147488	0.0235078
AT5G25250	1781.51	0.792056	0.30581	2.59003	0.00959678	0.0790133
AT3G21720	1328.08	0.791883	0.286281	2.76611	0.00567298	0.0570005
AT2G25460	253.616	0.790576	0.226854	3.48495	0.000492229	0.0108136
AT3G26470	166.008	0.790459	0.252649	3.12869	0.0017559	0.0263485
AT4G02830	133.877	0.789204	0.251699	3.13551	0.00171556	0.0259164
AT2G41660	34.3888	0.786907	0.29819	2.63894	0.00831654	0.0722527
AT1G23710	248.516	0.785208	0.250334	3.13665	0.00170893	0.0258808
AT1G61470/AT1G27820	24.9538	0.782906	0.283508	2.7615	0.00575373	0.0575318
AT4G37610/AT4G37608	457.813	0.782497	0.163303	4.79168	1.65393e-06	0.000156256
AT3G11550	120.184	0.782047	0.260752	2.9992	0.00270688	0.0352681
AT2G18670	80.4487	0.780276	0.246795	3.16163	0.00156888	0.0245383
AT1G71330	99.8428	0.780224	0.303722	2.56888	0.0102028	0.0814385
AT3G09440	344.854	0.780176	0.222437	3.50741	0.000452499	0.0101851
AT4G22640	1874.82	0.778815	0.277389	2.80766	0.00499022	0.0525669
AT5G48430	1173.76	0.776836	0.314701	2.46849	0.0135684	0.0965539
AT4G14746	38.6802	0.775935	0.224026	3.4636	0.000533008	0.0114586
AT2G16070/AT2G16060	19451.1	0.77592	0.284604	2.72631	0.0064046	0.0612214
AT5G07580	580.932	0.773446	0.257961	2.9983	0.0027149	0.0353226
AT2G32140	229.621	0.770765	0.239358	3.22014	0.00128128	0.0213055
AT3G51970	13.3852	0.770301	0.302767	2.54421	0.0109527	0.0850742
AT1G35910	1178.57	0.768998	0.237542	3.23732	0.0012066	0.0203854
AT1G31240	19.9339	0.767384	0.309062	2.48295	0.01303	0.0947505
AT5G59260	205.605	0.765079	0.289665	2.64126	0.00825989	0.071969
AT4G37900	722.219	0.762565	0.265724	2.86976	0.00410782	0.0465788
AT3G10020	1430.67	0.761637	0.308077	2.47223	0.0134273	0.0960238
AT3G03700	59.4448	0.75928	0.173963	4.3646	1.27358e-05	0.000717428
AT4G11655	605.012	0.759033	0.259168	2.92873	0.00340352	0.0409278
AT1G14160	1192.82	0.757501	0.180119	4.20556	2.60432e-05	0.00123298
AT3G62780	85.0065	0.754512	0.304307	2.47944	0.0131588	0.0952348
AT3G51340	41.4692	0.754377	0.25895	2.91321	0.0035773	0.0423646
AT4G23610	258.173	0.751026	0.290844	2.58223	0.00981652	0.0800985
AT3G22400	2484.14	0.750324	0.224847	3.33703	0.000846774	0.0158104
AT3G55890/AT2G40110	70.4426	0.750126	0.302908	2.47642	0.0132709	0.0955228
AT4G16146	46.9965	0.749667	0.283573	2.64365	0.00820176	0.0716693
AT1G52720	154.982	0.749436	0.155343	4.82438	1.40438e-06	0.00013826
AT5G08250	24.6315	0.74863	0.29765	2.51513	0.0118987	0.0894336
AT5G60280	330.881	0.745719	0.238674	3.12442	0.00178156	0.0266199
AT3G25655	83.0987	0.745375	0.287348	2.59398	0.00948723	0.0785466
AT5G16570	736.849	0.743333	0.267527	2.77853	0.00546053	0.0556837
AT4G36610	107.934	0.742793	0.211856	3.50612	0.000454686	0.0102125
AT3G21650	81.3686	0.742403	0.22454	3.30632	0.000945284	0.0172128
AT5G03990/AT5G03995	103.487	0.741909	0.193938	3.82549	0.000130514	0.0040496
AT3G21680	42.735	0.739674	0.258544	2.86092	0.00422414	0.0471829
AT2G48140	718.416	0.737615	0.257844	2.8607	0.00422712	0.0471829
AT3G51360	144.675	0.734995	0.23812	3.08666	0.00202417	0.0291691
AT1G68940/AT1G68935	358.781	0.73463	0.231353	3.17537	0.00149645	0.0237403
AT1G08090	7827.91	0.734259	0.219498	3.34517	0.000822313	0.0156077
AT4G01250	297.048	0.732557	0.191145	3.83247	0.000126862	0.00400365
AT5G13200	1725.75	0.731246	0.240108	3.04549	0.002323	0.0318419
AT1G65690	1031.2	0.727834	0.202249	3.5987	0.000319817	0.00790834
AT1G64400	547.49	0.726883	0.249944	2.90818	0.00363535	0.0428354
AT2G38110	322.238	0.725981	0.201433	3.60408	0.000313262	0.00778278
AT4G19645	48.3983	0.725907	0.185135	3.92095	8.81995e-05	0.00300678
AT2G23810	2128.63	0.723288	0.207386	3.48764	0.000487311	0.0107617
AT1G18570	335.872	0.721959	0.228166	3.16418	0.0015552	0.0244107
AT2G34500/AT2G28850	174.037	0.72035	0.246174	2.92618	0.00343155	0.0411708
AT1G19700	1737.37	0.719912	0.179188	4.01764	5.8784e-05	0.00223146
AT5G19875	13.2689	0.719657	0.275563	2.61159	0.00901235	0.0761316
AT5G59450	1354.2	0.719565	0.217954	3.30145	0.00096188	0.0174097
AT4G25810	530.395	0.719542	0.236299	3.04505	0.00232644	0.0318483
AT3G05200	995.518	0.717887	0.182417	3.93541	8.3056e-05	0.00286387
AT5G47930/AT2G45710	47.6486	0.716798	0.228217	3.14086	0.00168451	0.0255687
AT3G20980	18.923	0.716638	0.27282	2.62678	0.00861969	0.0738209
AT1G70690	950.11	0.715338	0.256445	2.78944	0.00528001	0.0545558
AT4G14365	313.444	0.714761	0.21419	3.33704	0.000846757	0.0158104
AT5G64190	21.0648	0.714707	0.23996	2.97844	0.00289718	0.0367385
AT5G44550	1253.39	0.713812	0.249875	2.85667	0.0042811	0.047621
AT4G38080	856.231	0.71261	0.213556	3.33688	0.000847253	0.0158104
AT3G21350/AT3G21351	3581.52	0.711833	0.26081	2.72932	0.00634658	0.0609157
AT3G52190	1577.23	0.711338	0.193203	3.68181	0.000231587	0.00617604
AT2G41640	477.462	0.710874	0.268547	2.64712	0.00811812	0.071384
AT2G30250	969.373	0.71049	0.236385	3.00565	0.0026501	0.0347865
AT1G80440	509.518	0.709823	0.242312	2.92937	0.00339649	0.0408899
AT5G13580	127.336	0.708535	0.255265	2.77568	0.00550865	0.0560169
AT3G56400	657.931	0.708427	0.198258	3.57326	0.000352567	0.00847932
AT1G17170	1810.16	0.707778	0.209498	3.37845	0.000728965	0.014407
AT3G14770	370.769	0.707216	0.212937	3.32125	0.000896158	0.0165182
AT3G13600	168.742	0.706318	0.238804	2.95773	0.00309912	0.0385205
AT4G29800	21.6027	0.705023	0.220016	3.20441	0.00135338	0.0222064
AT4G38830/AT4G38840	20.9885	0.704035	0.267985	2.62714	0.00861049	0.0737722
AT3G11570	131.956	0.70318	0.256676	2.73956	0.00615213	0.0596746
AT4G15417	457.541	0.702235	0.25901	2.71122	0.00670354	0.0628797
AT2G32300	418.33	0.698417	0.250103	2.79252	0.00522999	0.0541718
AT5G06740	913.732	0.6979	0.227517	3.06746	0.00215884	0.0302812
AT2G23430	32.8233	0.696466	0.200748	3.46935	0.000521717	0.0113198
AT4G18430/AT2G33870	424.637	0.69454	0.229693	3.02378	0.0024964	0.0332454
AT5G20250	3680.19	0.692369	0.272342	2.54228	0.0110133	0.0853131
AT2G01880/AT2G01870	88.8003	0.692023	0.243601	2.84081	0.00449993	0.048944
AT3G13950	1068.88	0.691706	0.250512	2.76117	0.00575955	0.0575627
AT3G60550	117.427	0.688357	0.268021	2.5683	0.01022	0.0814658
AT2G26530	1249.82	0.685234	0.233628	2.93301	0.00335688	0.0406114
AT1G08930	8142.5	0.684926	0.231107	2.96368	0.00303985	0.038008
AT2G21510	26.7069	0.68432	0.214108	3.19615	0.00139276	0.0226608
AT5G18150	172.839	0.683276	0.193338	3.5341	0.000409171	0.00952138
AT5G45000	130.816	0.682192	0.273832	2.49128	0.0127283	0.0931759
AT2G45170	554.156	0.680992	0.221161	3.07917	0.00207577	0.029624
AT1G12780	1885.75	0.67968	0.186456	3.64526	0.000267117	0.00689658
AT5G37450/AT3G53590	852.287	0.679225	0.263721	2.57555	0.0100081	0.0806852
AT3G56000	228.02	0.678548	0.222964	3.04331	0.00233995	0.0318715
AT5G18780/AT3G06320	189.39	0.677573	0.237387	2.85429	0.00431327	0.0477936
AT1G57980	1044.31	0.673654	0.216933	3.10535	0.00190052	0.0277671
AT1G55450	1442.41	0.672878	0.224399	2.99858	0.00271239	0.0353181
AT2G47190	165.986	0.672717	0.238893	2.81598	0.00486294	0.0516915
AT3G61760	75.9448	0.672259	0.20722	3.24418	0.00117788	0.0200709
AT2G23680	227.05	0.67137	0.267879	2.50625	0.0122021	0.0908387
AT4G26470	991.034	0.671123	0.213316	3.14614	0.00165442	0.0253309
AT2G05940	1032.25	0.67064	0.205741	3.25964	0.00111554	0.0193753
AT3G48360	445.513	0.669954	0.177785	3.76833	0.000164343	0.00482224
AT4G26050	667.17	0.669902	0.218455	3.06654	0.00216553	0.0302944
AT5G48540	1683.44	0.66951	0.195545	3.42381	0.000617495	0.0127293
AT3G03870	629.597	0.669431	0.206677	3.23902	0.00119942	0.020313
AT5G42190	496.252	0.669091	0.25881	2.58526	0.00973059	0.0795823
AT1G62630	119.55	0.665722	0.239888	2.77513	0.00551794	0.0560791
AT1G13260	1073.21	0.665107	0.144061	4.61683	3.89655e-06	0.000297436
AT2G36100	1080.24	0.664234	0.209412	3.17189	0.00151448	0.0239817
AT2G39430	745.573	0.663457	0.22988	2.8861	0.00390045	0.0450766
AT2G35000	515.121	0.658245	0.196377	3.35194	0.000802472	0.0153975
AT1G09070	937.897	0.658167	0.212223	3.1013	0.00192675	0.0280337
AT1G80110	192.977	0.658037	0.194397	3.38501	0.000711752	0.0141591
AT5G65790	868.403	0.657722	0.164829	3.99032	6.5985e-05	0.00241656
AT4G19230	407.632	0.657579	0.213993	3.07289	0.00211995	0.0299552
AT4G20780	178.186	0.656838	0.19587	3.35344	0.000798142	0.0153564
AT1G54540	277.139	0.65654	0.196258	3.34528	0.000821984	0.0156077
AT2G01180	282.433	0.656357	0.207432	3.16421	0.00155506	0.0244107
AT2G21100	374.935	0.655111	0.238327	2.74879	0.00598152	0.0585431
AT1G54050	125.997	0.654932	0.248838	2.63197	0.00848922	0.0731796
AT4G36430	6562.76	0.654754	0.145402	4.50306	6.69821e-06	0.00043962
AT1G79210	37.9921	0.653279	0.231768	2.81868	0.00482221	0.0514141
AT4G23550	452.468	0.652757	0.197572	3.3039	0.000953497	0.0173026
AT3G57380	111.279	0.652106	0.239648	2.72109	0.00650661	0.0617483
AT4G24130	306.823	0.651296	0.243047	2.67971	0.00736853	0.0670295
AT5G49780	160.31	0.650168	0.197639	3.28967	0.00100306	0.0179736
AT4G12090	282.804	0.64973	0.204092	3.18351	0.001455	0.0233822
AT4G15610	2627.79	0.649487	0.194774	3.33456	0.000854342	0.0159004
AT1G15385	39.2631	0.648699	0.198755	3.26381	0.00109925	0.019168
AT5G51890	358.404	0.644874	0.240108	2.68576	0.00723646	0.0661052
AT4G11230	331.668	0.644032	0.201334	3.19883	0.00137988	0.0225359
AT2G30930	1073.21	0.643361	0.199618	3.22296	0.00126872	0.02113
AT5G19410	114.46	0.642661	0.249492	2.57588	0.00999867	0.0806852
AT4G02370	359.388	0.641608	0.195654	3.2793	0.00104064	0.0184083
AT3G27880	157.034	0.640859	0.170754	3.75311	0.000174654	0.00504057
AT1G63720	116.024	0.639208	0.188279	3.39501	0.000686263	0.0137828
AT1G11810/AT2G33655	56.9479	0.639033	0.18334	3.48552	0.000491183	0.0108136
AT1G63530	130.506	0.63836	0.255221	2.50121	0.0123771	0.0915269
AT5G38310	23.6954	0.637823	0.231498	2.75519	0.00586575	0.0580186
AT2G10975	78.0269	0.637013	0.251912	2.52871	0.0114483	0.0872892
AT2G03200	233.718	0.636967	0.189223	3.36622	0.000762058	0.0148974
AT3G07195	1048.63	0.635456	0.208553	3.04698	0.00231155	0.0317263
AT5G23250	57.2914	0.63427	0.173404	3.65777	0.000254423	0.00665035
AT4G20140	700.229	0.633121	0.173923	3.64024	0.000272388	0.00700779
AT3G15450	15234.8	0.633008	0.165432	3.82639	0.000130034	0.00404395
AT1G76590	260.749	0.632686	0.199589	3.16994	0.0015247	0.0240797
AT1G28760	145.19	0.632495	0.240199	2.63321	0.00845812	0.0729712
AT1G67070	70.5063	0.629823	0.217188	2.8999	0.00373278	0.0436902
AT4G12690/AT2G04220	43.7012	0.62888	0.187825	3.34822	0.000813338	0.0155072
AT5G41610	281.016	0.627129	0.24663	2.54279	0.0109971	0.0852885
AT3G62260	220.181	0.626867	0.225567	2.77907	0.00545144	0.0556318
AT1G43910	4062.2	0.625407	0.24522	2.55039	0.0107603	0.0841807
AT3G29400	339.408	0.625124	0.197386	3.16701	0.00154013	0.0242327
AT2G44490	3660.08	0.625066	0.191691	3.2608	0.001111	0.0193282
AT1G73805	508.218	0.624659	0.228367	2.73533	0.00623177	0.0601976
AT1G34180	764.808	0.623397	0.165192	3.77378	0.000160794	0.00475396
AT4G31240	46.3418	0.622614	0.230986	2.69546	0.00702921	0.0648831
AT4G19160	2288.71	0.622506	0.205975	3.02224	0.00250912	0.0333726
AT3G26500	611.648	0.62232	0.18777	3.31427	0.000918822	0.0168182
AT1G31130	3063.37	0.622093	0.18067	3.44326	0.000574752	0.0121089
AT1G30040	376.579	0.620914	0.193818	3.20359	0.00135727	0.0222356
AT1G68850	423.915	0.620058	0.212102	2.9234	0.00346234	0.0414458
AT4G37940	385.507	0.619291	0.150502	4.11483	3.87468e-05	0.00163919
AT2G37440	663.937	0.617483	0.203075	3.04067	0.00236056	0.0320646
AT4G25940	195.617	0.616413	0.183574	3.35784	0.000785531	0.0152046
AT1G28500	703.251	0.615852	0.241897	2.54593	0.0108987	0.0848847
AT1G64040	469.74	0.614766	0.128284	4.79224	1.64926e-06	0.000156256
AT5G52830	90.9023	0.614203	0.210727	2.91468	0.00356051	0.042233
AT4G17280	393.142	0.613388	0.164181	3.73605	0.000186932	0.00529131
AT5G67140	509.289	0.611972	0.198799	3.07834	0.00208154	0.0296562
AT4G34380	73.1905	0.611392	0.199833	3.05951	0.00221697	0.0307859
AT1G74460	684.658	0.610029	0.210524	2.89767	0.00375944	0.0438317
AT2G35380	125.011	0.608481	0.181821	3.3466	0.000818098	0.0155697
AT4G24140	331.691	0.607104	0.222375	2.73009	0.00633164	0.0608504
AT1G44020	178.131	0.606482	0.155873	3.89089	9.98787e-05	0.00330856
AT2G46550	1873.32	0.60605	0.22615	2.67986	0.00736529	0.0670289
AT1G71697	1361.94	0.605435	0.20525	2.94974	0.00318041	0.0392718
AT2G35910	143.571	0.604816	0.152748	3.95956	7.50884e-05	0.00267422
AT4G08730	153.274	0.604581	0.206581	2.9266	0.00342685	0.0411379
AT5G54585	74.217	0.604506	0.1682	3.59397	0.000325677	0.00801561
AT2G24570	5213.6	0.603732	0.183967	3.28173	0.00103171	0.0183427
AT2G02810	119.789	0.603601	0.22556	2.67601	0.00745052	0.0675129
AT4G06534/AT4G06536	422.858	0.603436	0.222876	2.7075	0.00677919	0.0633366
AT3G15810	1046.16	0.602572	0.185021	3.25677	0.00112686	0.0195236
AT2G02850	461.647	0.602563	0.197986	3.04345	0.00233879	0.0318715
AT4G32860	388.936	0.601483	0.189875	3.16778	0.00153608	0.024205
AT1G33970	1028.22	0.599828	0.230408	2.60333	0.00923238	0.0771856
AT2G19800	982.137	0.599644	0.173174	3.46267	0.000534837	0.0114862
AT5G47120/AT5G47130	3152.13	0.597695	0.209145	2.85781	0.00426581	0.0475514
AT5G59570	79.8419	0.597227	0.23692	2.5208	0.0117089	0.0886073
AT5G09530	2176.5	0.595847	0.209397	2.84554	0.0044336	0.0485484
AT5G49450/AT5G49448	486.847	0.595756	0.199879	2.98059	0.00287695	0.036557
AT3G22600/AT4G14815	2757.07	0.595136	0.179434	3.31674	0.000910753	0.0167432
AT5G38895	239.461	0.594792	0.130171	4.56931	4.89342e-06	0.000356275
AT2G38470	475.963	0.594672	0.18607	3.19597	0.00139364	0.0226608
AT2G48130	933.473	0.594577	0.220617	2.69507	0.00703742	0.0648859
AT1G29230	84.6412	0.593579	0.231072	2.56881	0.0102049	0.0814385
AT2G45510/AT2G44890	437.583	0.592637	0.180711	3.27947	0.00104004	0.0184083
AT3G47730	6279.77	0.591693	0.226854	2.60826	0.00910039	0.0766908
AT2G35710	403.103	0.59122	0.209702	2.81934	0.00481231	0.0513606
AT4G12720	1468.41	0.590672	0.210217	2.80982	0.00495686	0.0523295
AT2G38360	622.894	0.590374	0.193621	3.04912	0.00229516	0.0315264
AT3G03000/AT1G32250	223.714	0.589583	0.191446	3.07963	0.00207259	0.029624
AT2G40370	422.922	0.589026	0.227214	2.59238	0.00953136	0.0786327
AT1G23120	990.019	0.587293	0.209694	2.80071	0.00509904	0.053287
AT5G41080	822.463	0.587048	0.213453	2.75024	0.00595513	0.058409
AT4G27450	21254.6	0.585532	0.232774	2.51545	0.0118881	0.0894178
AT3G55980	4947.94	0.585423	0.210784	2.77737	0.00548013	0.0558025
AT5G62865	235.052	0.584097	0.204568	2.85527	0.00430006	0.0477311
AT3G29035	2063.57	0.583964	0.195227	2.9912	0.00277886	0.0357636
AT1G80670/AT1G15850	1794.83	0.583596	0.230611	2.53066	0.0113849	0.0870942
AT1G09155	137.133	0.582641	0.185914	3.13392	0.00172488	0.0259941
AT5G64000	926.14	0.582637	0.208174	2.7988	0.00512924	0.0535089
AT1G30755	872.696	0.582367	0.189799	3.06834	0.0021525	0.0302124
AT1G13990	273.085	0.582186	0.188783	3.08388	0.00204317	0.0293641
AT3G52800	2667.57	0.581914	0.201155	2.89286	0.00381751	0.0443125
AT1G25550	748.912	0.580741	0.151527	3.83258	0.000126808	0.00400365
AT4G22680	22.3769	0.579186	0.217865	2.65847	0.00784966	0.0700096
AT3G48020	304.86	0.57849	0.217037	2.6654	0.00768975	0.069057
AT1G11530	377.175	0.577408	0.203004	2.84433	0.00445053	0.0486074
AT3G23110	59.5618	0.576927	0.182547	3.16042	0.0015754	0.0245855
AT4G33510	190.554	0.575547	0.174726	3.29399	0.000987748	0.0178014
AT4G28890	489.458	0.575137	0.195961	2.93495	0.00333604	0.040486
AT2G47630	197.708	0.574986	0.150796	3.81299	0.000137293	0.00419811
AT3G09220	2907.41	0.574961	0.182834	3.14471	0.00166253	0.025401
AT5G65200	412.474	0.57333	0.182389	3.14345	0.00166969	0.0254537
AT1G72416	208.853	0.571363	0.227001	2.517	0.0118357	0.0892786
AT1G16030	274.192	0.571098	0.206262	2.7688	0.00562638	0.0567432
AT5G50760	195.163	0.570467	0.150496	3.79057	0.000150301	0.004531
AT2G37360	560.671	0.569067	0.217331	2.61844	0.00883339	0.0752482
AT3G47370	102.202	0.567965	0.189949	2.9901	0.0027889	0.0358477
AT2G43140	891.868	0.564476	0.17682	3.19238	0.00141106	0.0228854
AT5G62770	245.037	0.563704	0.194764	2.89429	0.00380019	0.044209
AT2G33210	196.072	0.561577	0.107176	5.23976	1.60784e-07	2.62616e-05
AT4G20860	822.321	0.561388	0.21691	2.58811	0.00965031	0.079106
AT5G16940	30.5603	0.560008	0.214952	2.60527	0.00918019	0.0769631
AT2G39420	1714.98	0.559941	0.18008	3.1094	0.00187468	0.027636
AT1G07520	423.824	0.559046	0.184438	3.03107	0.00243685	0.0328048
AT5G13190	681.139	0.559037	0.199529	2.80178	0.0050821	0.0531627
AT1G44770	1006.63	0.558442	0.184045	3.03427	0.00241119	0.0325635
AT4G20260	4417.22	0.557963	0.158005	3.5313	0.000413524	0.00958429
AT3G15760	234.423	0.556951	0.167046	3.33412	0.000855692	0.0159115
AT5G42050	5648.39	0.556369	0.199707	2.78593	0.00533745	0.0549628
AT5G01250	365.098	0.55631	0.160544	3.46515	0.00052994	0.0114276
AT4G21440	85.9491	0.555686	0.225763	2.46136	0.013841	0.0974605
AT2G44310	489.811	0.55508	0.21725	2.55503	0.0106179	0.0835594
AT2G41380	1442.81	0.553145	0.18254	3.03027	0.00244336	0.0328352
AT3G16560	589.618	0.55289	0.118859	4.65165	3.29293e-06	0.000264792
AT3G23180	224.855	0.552686	0.215957	2.55925	0.0104899	0.0829013
AT1G70870	216.346	0.552434	0.225567	2.44909	0.0143218	0.0995155
AT2G34400	102.063	0.549706	0.182997	3.00391	0.00266538	0.0349
AT5G65990/AT5G65980	752.549	0.549595	0.199799	2.75074	0.00594616	0.058409
AT1G11050	766.953	0.549476	0.197374	2.78393	0.00537043	0.0550312
AT5G24270	194.833	0.548828	0.11591	4.73494	2.19118e-06	0.000193154
AT2G24580	239.338	0.548273	0.201885	2.71576	0.00661235	0.0624144
AT3G23160	101.147	0.547681	0.211566	2.5887	0.00963378	0.0790798
AT1G01550	8766.27	0.547624	0.159734	3.42835	0.000607254	0.0126419
AT3G21260	311.833	0.545085	0.2166	2.51655	0.011851	0.0893301
AT3G11820	1055.87	0.544805	0.188186	2.89503	0.00379117	0.044158
AT4G20110	2864.32	0.544499	0.22072	2.46693	0.0136279	0.0966056
AT1G01230	565.523	0.544245	0.180364	3.01748	0.00254889	0.0337949
AT1G21100	2770.16	0.543048	0.19856	2.73493	0.0062393	0.0602151
AT1G01660	44.5684	0.542391	0.192197	2.82206	0.00477156	0.0510291
AT1G01500	168.72	0.541934	0.200146	2.70769	0.00677535	0.0633288
AT1G19310	727.602	0.541905	0.205544	2.63644	0.00837804	0.0725477
AT1G08315	375.706	0.541785	0.132716	4.0823	4.45928e-05	0.0018207
AT5G51390	51.9954	0.54027	0.192825	2.80187	0.00508072	0.0531627
AT4G33050	1832.04	0.538192	0.139965	3.84519	0.000120459	0.00386277
AT1G32170	1018.65	0.537983	0.12	4.4832	7.35332e-06	0.000476676
AT3G19240	1748.65	0.537512	0.184639	2.91115	0.00360106	0.0425265
AT5G46780	1127.21	0.537402	0.152796	3.51712	0.00043626	0.00996869
AT5G01750/AT3G11740	1434.33	0.536776	0.178678	3.00415	0.00266321	0.0348933
AT4G37050	262.399	0.532039	0.191101	2.78407	0.0053682	0.0550312
AT5G47450	7286.66	0.530868	0.167381	3.1716	0.00151599	0.0239817
AT2G42590	576.399	0.530525	0.130351	4.06998	4.70169e-05	0.00190125
AT1G64900	711.281	0.530191	0.201031	2.63736	0.00835548	0.0724529
AT1G21010	580.027	0.527382	0.196377	2.68556	0.0072409	0.0661052
AT5G61490/AT5G61495	391.004	0.52709	0.207653	2.53832	0.0111386	0.0858958
AT4G39780	787.044	0.526494	0.142476	3.69532	0.000219613	0.00592624
AT1G28260	510.187	0.52613	0.144753	3.63468	0.000278324	0.00708179
AT3G53990	3272	0.525206	0.141092	3.72245	0.000197301	0.0054766
AT2G02370	485.132	0.525141	0.174143	3.01557	0.00256498	0.0339441
AT2G31990	410.538	0.524428	0.209502	2.50321	0.0123072	0.0912021
AT5G66540	72.4314	0.524049	0.144496	3.62673	0.000287037	0.00725965
AT2G26670	770.499	0.523654	0.16876	3.10295	0.00191599	0.027935
AT3G60910	279.183	0.523641	0.213382	2.454	0.0141276	0.0985561
AT3G24310	56.0159	0.523579	0.195533	2.67769	0.00741309	0.0673185
AT2G36220	333.591	0.523102	0.186907	2.79873	0.00513043	0.0535089
AT3G61450	75.9701	0.521781	0.197526	2.64158	0.0082521	0.071969
AT1G01340/AT4G01010	628.413	0.521404	0.202948	2.56914	0.010195	0.0814385
AT1G36370	369.547	0.521326	0.171526	3.03934	0.00237096	0.0321475
AT1G80450	115.868	0.520665	0.16217	3.21062	0.0013245	0.0218346
AT3G53230	279.863	0.518724	0.163039	3.1816	0.00146463	0.0234118
AT1G74210	380.035	0.518523	0.171456	3.02423	0.00249266	0.0332165
AT5G27420	330.696	0.51845	0.204907	2.53018	0.0114004	0.0871493
AT3G08970	542.392	0.516312	0.19582	2.63667	0.00837247	0.0725387
AT5G54540	1464.41	0.516302	0.159571	3.23556	0.00121403	0.0204453
AT1G06570	2089.34	0.514886	0.18303	2.81311	0.00490642	0.0520485
AT1G80920	1712.21	0.514503	0.162582	3.16457	0.00155314	0.0244107
AT1G61360	292.489	0.513853	0.172043	2.98676	0.00281949	0.0360448
AT1G67060	390.879	0.513023	0.143161	3.58354	0.000338974	0.00827653
AT2G27580	415.201	0.512671	0.188889	2.71415	0.00664467	0.0624955
AT2G45910	3105.51	0.51185	0.196535	2.60436	0.00920453	0.0770752
AT3G51180	91.1216	0.508477	0.201315	2.52578	0.0115442	0.0877967
AT5G04710	179.421	0.507173	0.137586	3.68623	0.000227605	0.0061163
AT5G64660	788.37	0.507031	0.180384	2.81084	0.0049413	0.0523132
AT5G27920	1495.12	0.505458	0.113212	4.46469	8.01842e-06	0.000502774
AT1G26800	127.065	0.504326	0.174042	2.89773	0.00375871	0.0438317
AT5G17760/AT3G29800	3032.66	0.504223	0.206035	2.44726	0.0143946	0.0997909
AT5G45410	2172.75	0.503728	0.132561	3.79997	0.000144716	0.00439954
AT3G15580	625.712	0.502434	0.141476	3.55138	0.000383215	0.00905428
AT5G56340	988.924	0.502368	0.179596	2.7972	0.00515469	0.0536821
AT2G31880	2247.91	0.502014	0.1776	2.82666	0.00470364	0.0505078
AT4G13830	456.758	0.501787	0.19315	2.59791	0.00937935	0.0780119
AT1G02900	1106.41	0.500711	0.171532	2.91905	0.00351099	0.0417954
AT5G21900	68.5863	0.500541	0.184361	2.715	0.00662756	0.062474
AT2G47370	120.464	0.500399	0.190151	2.63159	0.00849858	0.0732003

## Sheet: Tab. S3c
Table S3c: differentially expressed genes (DEGs) detected as downregulated under Cd stress responses in A. thaliana root
	baseMean	log2FoldChange	lfcSE	stat	pvalue	padj
AT1G01170	3031.36	-0.622582	0.250986	-2.48055	0.0131181	0.0352565
AT1G01340	662.458	-0.656221	0.234088	-2.80331	0.00505803	0.0163377
AT1G01350	1462.22	-0.262559	0.119724	-2.19304	0.0283044	0.064883
AT1G01480	392.735	-1.61611	0.568859	-2.84097	0.00449766	0.0149145
AT1G01550	8574.38	-0.387492	0.0899748	-4.30668	1.65726e-05	0.000145682
AT1G01650	2121.43	-0.278585	0.106423	-2.61771	0.00885225	0.0257445
AT1G01720	3443.91	-1.03857	0.29486	-3.52226	0.000427884	0.00217806
AT1G01730	1245.01	-0.937592	0.168739	-5.55647	2.75289e-08	5.99866e-07
AT1G01770	2513.43	-1.20671	0.213368	-5.65554	1.55355e-08	3.62208e-07
AT1G01820	3171.4	-0.912885	0.231294	-3.94686	7.91813e-05	0.000537248
AT1G01860	890.165	-0.426289	0.189145	-2.25377	0.0242104	0.0574871
AT1G01910	3313.95	-0.310495	0.121575	-2.55393	0.0106513	0.0298961
AT1G02060	466.912	-0.984251	0.31423	-3.13226	0.00173467	0.00688703
AT1G02160	696.765	-0.363904	0.163798	-2.22166	0.026306	0.0612941
AT1G02220	2095.87	-0.952502	0.404603	-2.35416	0.0185645	0.0464317
AT1G02270	1290.2	-0.626884	0.167298	-3.74711	0.000178882	0.00106792
AT1G02280	6958.38	-0.645529	0.254519	-2.53627	0.011204	0.0311336
AT1G02300	1191	-0.46716	0.165899	-2.81592	0.00486371	0.0158501
AT1G02470	334.947	-3.74829	0.611567	-6.129	8.84357e-10	2.76814e-08
AT1G02500	21465.4	0.497611	0.18264	2.72455	0.00643893	0.0198313
AT1G02640	5800.32	-0.905313	0.411875	-2.19803	0.027947	0.0642066
AT1G02660	8883.15	-1.17029	0.366716	-3.19127	0.00141649	0.0058322
AT1G02750	1005.07	-0.806358	0.344301	-2.34201	0.0191801	0.047514
AT1G02770	46.6126	-1.56351	0.513019	-3.04767	0.00230626	0.00865703
AT1G02816	1847.24	-0.569589	0.249985	-2.2785	0.022697	0.0544756
AT1G02850	5089.93	-2.33659	0.376318	-6.20907	5.32987e-10	1.75051e-08
AT1G02860	1933.32	-2.23736	0.313127	-7.14522	8.98493e-13	5.62476e-11
AT1G02920	13525.1	-3.36795	0.624938	-5.38926	7.07486e-08	1.37741e-06
AT1G02930	17552.2	-2.54454	0.625278	-4.06946	4.71216e-05	0.000348419
AT1G02960	1339.12	-0.510052	0.128583	-3.96671	7.28724e-05	0.000501956
AT1G03090	16561.3	-2.83354	0.429451	-6.59806	4.1658e-11	1.75474e-09
AT1G03150	886.847	-0.515243	0.24539	-2.09969	0.035756	0.0782589
AT1G03240	753.701	-2.49523	1.03514	-2.41054	0.015929	0.041227
AT1G03280	2482.24	-0.328193	0.110813	-2.9617	0.0030595	0.0109154
AT1G03290	2710.52	-0.499676	0.210778	-2.37062	0.0177582	0.0448847
AT1G03370	2901.35	-0.576202	0.159137	-3.6208	0.000293696	0.00160689
AT1G03445	14.0691	-1.46597	0.719659	-2.03704	0.0416462	0.088386
AT1G03470	2797.66	-2.66242	0.369807	-7.1995	6.04358e-13	3.82569e-11
AT1G03620	186.528	-0.709605	0.21564	-3.29069	0.000999403	0.00439606
AT1G03760	668.718	-1.04485	0.242847	-4.3025	1.6888e-05	0.000147995
AT1G03850	1422.01	-1.01018	0.262016	-3.8554	0.00011554	0.00074007
AT1G04140	6597.63	-0.309736	0.144466	-2.144	0.0320325	0.0717712
AT1G04170	5513.52	-0.232238	0.0890666	-2.60746	0.00912158	0.0263867
AT1G04200	2265.82	-0.5861	0.210492	-2.78443	0.00536213	0.0170957
AT1G04340	1038.13	0.293717	0.121749	2.41248	0.0158445	0.0410551
AT1G04350	4654.76	-0.815307	0.237215	-3.437	0.000588187	0.00282764
AT1G04400	9090.76	-0.496811	0.173689	-2.86035	0.00423178	0.0142497
AT1G04500	43.2312	-2.21369	0.691738	-3.20018	0.00137341	0.00568788
AT1G04780	4369.04	-0.601666	0.180889	-3.32616	0.0008805	0.0039544
AT1G04860	2199.32	-0.441415	0.186537	-2.36636	0.017964	0.0452937
AT1G04945	470.981	-1.61994	0.361186	-4.48506	7.28938e-06	7.31585e-05
AT1G04990	1591.36	-0.81556	0.30305	-2.69117	0.00712018	0.0215488
AT1G05060	1459.72	-0.984049	0.277177	-3.55025	0.000384859	0.00200173
AT1G05160	547.454	-0.369513	0.150652	-2.45276	0.0141766	0.0374442
AT1G05300	276.634	-1.03059	0.254393	-4.05117	5.09622e-05	0.000371592
AT1G05340	1212.39	-1.777	0.431838	-4.11497	3.87236e-05	0.000296271
AT1G05410	1117.56	-0.502233	0.139855	-3.59111	0.000329272	0.00176239
AT1G05490	79.5152	-1.22455	0.516629	-2.37028	0.0177746	0.0449063
AT1G05560	3870.45	-0.952755	0.338813	-2.81203	0.00492293	0.0160246
AT1G05575	228.611	-1.65778	0.576598	-2.8751	0.00403898	0.0137064
AT1G05680	6800.08	-3.91691	0.478926	-8.17854	2.8731e-16	3.5386e-14
AT1G05790	1755.02	-0.463434	0.181502	-2.55333	0.0106699	0.0299407
AT1G05830	3444.87	-0.857482	0.16911	-5.07055	3.96671e-07	5.96904e-06
AT1G05890	5328.2	-0.631723	0.1719	-3.67494	0.000237909	0.00135057
AT1G06150	1817.82	-0.466598	0.160432	-2.90838	0.00363301	0.0125505
AT1G06410	15891.9	-0.477569	0.190178	-2.51117	0.0120331	0.0329661
AT1G06440	133.961	-1.51244	0.420389	-3.59772	0.000321022	0.00172479
AT1G06460	3037.04	-0.988852	0.25044	-3.94846	7.86561e-05	0.000535287
AT1G06470	1464.08	-0.556076	0.2121	-2.62177	0.00874753	0.0254952
AT1G06520	224.259	-1.34941	0.212536	-6.34908	2.16606e-10	7.81645e-09
AT1G06570	10190.1	-1.60121	0.425541	-3.76276	0.000168051	0.00101611
AT1G06650	4261.92	-0.835472	0.222395	-3.7567	0.000172169	0.00103603
AT1G06690	7515.81	-0.814847	0.332201	-2.45288	0.0141719	0.0374442
AT1G06710	486.121	-1.46668	0.405182	-3.6198	0.000294829	0.00161088
AT1G06840	2391.55	-0.578346	0.162962	-3.54897	0.000386748	0.00200744
AT1G07110	18054.5	-1.29122	0.314079	-4.11111	3.93762e-05	0.000299645
AT1G07130	313.409	-1.55442	0.447787	-3.47134	0.000517876	0.00254579
AT1G07135	2441.01	-1.81846	0.698228	-2.60439	0.00920376	0.0265634
AT1G07140	8454.88	-0.324399	0.156223	-2.07651	0.037847	0.0818405
AT1G07360	2165.15	-0.260937	0.129936	-2.00819	0.0446234	0.0934247
AT1G07450	223.696	-0.66131	0.259764	-2.54581	0.0109023	0.0304948
AT1G07650	4094.07	-1.2581	0.194704	-6.46158	1.03614e-10	4.06245e-09
AT1G07660	1156.52	0.365205	0.144276	2.53129	0.0113644	0.0314995
AT1G07700	3220.81	-0.371268	0.181782	-2.04238	0.041114	0.0874907
AT1G07730	675.307	-2.25347	1.11822	-2.01523	0.0438809	0.0921621
AT1G07740	306.965	-0.526653	0.194395	-2.7092	0.00674459	0.0206158
AT1G08070	129.474	-0.99432	0.298244	-3.33391	0.000856345	0.0038751
AT1G08200	11591.8	0.405255	0.168313	2.40774	0.0160514	0.0414396
AT1G08210	1020.72	-0.523964	0.239228	-2.19023	0.0285074	0.0652296
AT1G08300	320.14	-1.05839	0.198557	-5.33038	9.80068e-08	1.82951e-06
AT1G08510	7538	0.438387	0.141072	3.10754	0.00188652	0.00737619
AT1G08550	4857.56	-1.07839	0.332505	-3.24324	0.00118177	0.00502651
AT1G08620	1830	-0.559945	0.166139	-3.37035	0.000750739	0.00346926
AT1G08630	4249.03	-6.74237	0.597291	-11.2882	1.49994e-29	1.69959e-26
AT1G08800	2206.22	-0.89785	0.242563	-3.70151	0.000214323	0.0012384
AT1G08830	2560.71	-0.900724	0.283166	-3.18091	0.00146815	0.00600346
AT1G08900	2220.32	-0.654286	0.15051	-4.34712	1.37937e-05	0.000124144
AT1G08930	20089.8	-0.897646	0.340674	-2.63491	0.00841591	0.0246729
AT1G08940	609.597	-1.04751	0.427786	-2.44868	0.014338	0.037796
AT1G09010	5855.52	-0.521902	0.145432	-3.58864	0.000332403	0.00177329
AT1G09080	227.021	-2.3623	0.520688	-4.53689	5.70891e-06	5.89678e-05
AT1G09210	7199.13	0.303543	0.122934	2.46915	0.0135433	0.0361933
AT1G09230	694.553	-0.451575	0.175638	-2.57106	0.0101388	0.0287565
AT1G09270	3672.35	0.294807	0.124296	2.37181	0.0177012	0.0447906
AT1G09330	1753.73	0.297028	0.106379	2.79216	0.00523572	0.0167872
AT1G09415	987.485	-0.973332	0.346748	-2.80703	0.00500012	0.0161973
AT1G09460	641.612	-0.971522	0.185239	-5.2447	1.56541e-07	2.69979e-06
AT1G09500	2314.92	-6.27365	0.617448	-10.1606	2.97198e-24	1.24724e-21
AT1G09760	2378.6	-0.398606	0.161856	-2.46272	0.0137887	0.0366845
AT1G09910	1406.57	-0.410872	0.193529	-2.12305	0.0337497	0.0747932
AT1G09970	16985.9	-0.881771	0.311251	-2.83299	0.00461148	0.0151894
AT1G10060	588.653	-1.14211	0.518691	-2.2019	0.0276723	0.0637436
AT1G10070	5494.14	-3.93316	0.733474	-5.36237	8.21358e-08	1.5801e-06
AT1G10140	1860.28	-2.12145	0.428376	-4.9523	7.33432e-07	1.00612e-05
AT1G10170	12364.9	-1.86394	0.339732	-5.4865	4.09968e-08	8.47306e-07
AT1G10340	280.791	-1.67214	0.382256	-4.37441	1.2176e-05	0.000111443
AT1G10490	1489.17	-0.639426	0.193094	-3.31148	0.000928054	0.00413032
AT1G10600	1559.14	-1.2529	0.240151	-5.21714	1.81705e-07	3.07124e-06
AT1G10760	8362.34	-1.26836	0.185848	-6.8247	8.81107e-12	4.45706e-10
AT1G10865	1254.88	-1.23083	0.244009	-5.04419	4.55439e-07	6.74586e-06
AT1G10900	3383.39	-0.442082	0.216935	-2.03786	0.0415643	0.0882287
AT1G10940	5816.74	-0.520614	0.111681	-4.66163	3.13715e-06	3.54761e-05
AT1G11200	807.247	-0.840583	0.252422	-3.33008	0.000868223	0.00391197
AT1G11210	79.1035	-1.41154	0.441885	-3.19436	0.00140143	0.00578491
AT1G11260	45312.4	-1.47873	0.540351	-2.73661	0.00620754	0.0192759
AT1G11310	7563.81	-0.313104	0.145237	-2.15582	0.0310979	0.070027
AT1G11360	2039.73	-0.555461	0.206928	-2.68432	0.00726769	0.0218958
AT1G11362	20.0032	-5.61562	1.12328	-4.99929	5.75416e-07	8.21163e-06
AT1G11450	488.808	-1.4667	0.580273	-2.5276	0.0114845	0.0317546
AT1G11530	1282.35	-1.84535	0.303247	-6.08528	1.16284e-09	3.55153e-08
AT1G11710	142.836	-1.04398	0.453463	-2.30223	0.021322	0.051812
AT1G11755	643.821	-0.722579	0.238479	-3.02995	0.00244596	0.00907205
AT1G11890	1840.07	-0.431771	0.184777	-2.33671	0.0194543	0.0480358
AT1G11960	678.187	-0.450989	0.224583	-2.00812	0.0446305	0.0934247
AT1G12010	770.415	-1.43588	0.307966	-4.66247	3.12436e-06	3.54021e-05
AT1G12030	6181.66	-2.65739	0.792412	-3.35354	0.000797837	0.00365412
AT1G12211	116.186	-22.8946	3.67871	-6.22354	4.86067e-10	1.61514e-08
AT1G12220	938.083	-0.687273	0.264007	-2.60324	0.00923477	0.0266325
AT1G12230	5224.35	-0.541733	0.229508	-2.36041	0.0182549	0.045864
AT1G12310	2984.9	0.429019	0.207502	2.06754	0.0386836	0.0833201
AT1G12520	1451.85	-0.725305	0.237717	-3.05112	0.00227988	0.00857964
AT1G12730	345.341	-0.674578	0.2293	-2.94191	0.003262	0.0115038
AT1G12750	1204.8	0.466669	0.226745	2.05812	0.0395785	0.0848399
AT1G12780	14374.8	-2.07369	0.361823	-5.73123	9.97031e-09	2.45062e-07
AT1G12805	20.2664	-3.84945	1.77421	-2.16968	0.0300314	0.0681253
AT1G12810	1551.93	-0.430674	0.204974	-2.10111	0.0356312	0.0780469
AT1G13160	1558.91	-0.363822	0.18322	-1.98571	0.0470658	0.0974247
AT1G13210	3860.12	-0.937142	0.285481	-3.28267	0.00102827	0.00449859
AT1G13245	5973.74	-0.903022	0.269738	-3.34778	0.000814614	0.00370997
AT1G13260	4927.13	-0.613551	0.308348	-1.9898	0.0466128	0.0966989
AT1G13270	3320.31	-0.720518	0.255252	-2.82277	0.00476113	0.015592
AT1G13300	2646.89	-1.59742	0.322247	-4.95714	7.15391e-07	9.82557e-06
AT1G13340	738.386	-1.36501	0.604973	-2.25632	0.0240505	0.0572153
AT1G13390	1950.6	-1.20659	0.288116	-4.18786	2.816e-05	0.00022662
AT1G13410	115.964	-1.32172	0.391468	-3.37632	0.000734635	0.00340039
AT1G13520	643.074	-1.4085	0.576044	-2.44513	0.0144801	0.0381062
AT1G13560	3779.1	-0.329605	0.165704	-1.98913	0.0466874	0.0968005
AT1G13609	8305.44	-2.26273	0.776284	-2.91483	0.00355887	0.0123282
AT1G13610	287.048	-2.1636	0.485572	-4.45577	8.35927e-06	8.1866e-05
AT1G13630	258.781	-1.88099	0.463893	-4.05479	5.01785e-05	0.000366821
AT1G13640	5386.06	-0.928145	0.285597	-3.24984	0.0011547	0.00493369
AT1G13700	2445.03	-1.81255	0.318971	-5.68249	1.3275e-08	3.1734e-07
AT1G13990	2291.61	-2.16044	0.370471	-5.83161	5.48945e-09	1.41366e-07
AT1G14205	292.824	-0.884844	0.24236	-3.65095	0.000261273	0.00146269
AT1G14210	1390.6	-0.68269	0.34162	-1.99839	0.0456746	0.0950658
AT1G14230	1446.42	-0.539339	0.162387	-3.32133	0.000895907	0.00401087
AT1G14300	940.543	-1.32892	0.215983	-6.15287	7.60931e-10	2.45066e-08
AT1G14360	1642.89	-0.630094	0.298592	-2.11022	0.0348392	0.0765788
AT1G14370	1100.92	-1.21964	0.384914	-3.16859	0.00153181	0.00621446
AT1G14740	6739.6	-0.436335	0.181167	-2.40847	0.0160196	0.041375
AT1G14870	4235.27	-1.037	0.491892	-2.10819	0.0350148	0.0768753
AT1G14890	1051.29	-1.35293	0.279014	-4.84896	1.24109e-06	1.59262e-05
AT1G14900	1192.82	-0.396262	0.187899	-2.10891	0.0349526	0.0767833
AT1G15010	264.655	-1.8187	0.576472	-3.15489	0.00160558	0.00645138
AT1G15040	4786.46	-4.03054	0.443554	-9.08693	1.01876e-19	1.80368e-17
AT1G15200	5128.27	-0.487986	0.179721	-2.71524	0.00662273	0.0202981
AT1G15290	11892.2	-0.383753	0.15382	-2.49481	0.0126024	0.0341707
AT1G15350	1825.86	-0.694635	0.132276	-5.25141	1.50935e-07	2.61506e-06
AT1G15380	2089.21	-1.7498	0.46955	-3.72655	0.000194117	0.00114009
AT1G15420	1182.42	-0.896247	0.195253	-4.59019	4.42845e-06	4.74104e-05
AT1G15470	760.587	0.349053	0.108528	3.21626	0.00129875	0.00542231
AT1G15480	641.028	-1.07826	0.208248	-5.17775	2.24573e-07	3.66663e-06
AT1G15500	14252.2	-1.06686	0.218635	-4.87965	1.06276e-06	1.40351e-05
AT1G15510	872.826	-2.27535	0.368771	-6.1701	6.82452e-10	2.22209e-08
AT1G15520	1684.25	-3.85265	0.999536	-3.85444	0.000115995	0.00074131
AT1G15530	1510.66	-0.990073	0.356255	-2.77912	0.00545071	0.0173197
AT1G15670	2086.98	-1.08927	0.366078	-2.97552	0.00292491	0.0105313
AT1G15710	731.833	0.257837	0.125847	2.04881	0.0404802	0.0864459
AT1G15750	13082	-0.528339	0.179591	-2.94191	0.00326196	0.0115038
AT1G15790	268.942	-1.80629	0.521263	-3.46523	0.00052978	0.0025998
AT1G15800	324.77	-0.596712	0.258221	-2.31085	0.020841	0.0508285
AT1G15890	237.989	-0.744775	0.336569	-2.21284	0.0269086	0.0624157
AT1G16030	811.489	-1.10147	0.393341	-2.80028	0.00510576	0.0164665
AT1G16130	927.927	-2.10676	0.422054	-4.99168	5.9855e-07	8.48348e-06
AT1G16280	678.018	-0.748402	0.189979	-3.93939	8.16897e-05	0.000551451
AT1G16445	304.795	-0.760149	0.287958	-2.63979	0.00829563	0.0243644
AT1G16460	3425.58	-0.538127	0.173926	-3.09401	0.00197474	0.0076394
AT1G16510	330.599	-1.65296	0.307803	-5.3702	7.86503e-08	1.51821e-06
AT1G16650	496.73	-0.732641	0.166524	-4.39961	1.08445e-05	0.000101051
AT1G17020	777.126	-1.18885	0.533387	-2.22887	0.0258225	0.0604159
AT1G17147	261.826	-1.19214	0.360422	-3.30763	0.000940898	0.00417927
AT1G17170	5835.81	-0.780647	0.355839	-2.19382	0.028248	0.0647932
AT1G17220	28592.5	-0.710968	0.265633	-2.6765	0.00743947	0.0223071
AT1G17470	5121.91	-0.624359	0.160077	-3.90036	9.60483e-05	0.000635703
AT1G17550	2299.14	0.437072	0.198613	2.20062	0.027763	0.0639265
AT1G17665	114.637	-3.4945	0.50202	-6.96088	3.38149e-12	1.8421e-10
AT1G17940	910.874	-0.792114	0.12062	-6.56701	5.13361e-11	2.14073e-09
AT1G17960	545.114	-1.95985	0.479934	-4.08358	4.43468e-05	0.000330154
AT1G18070	7488.07	-0.413943	0.130988	-3.16015	0.00157686	0.00635849
AT1G18200	372.695	-1.73625	0.264912	-6.55408	5.59863e-11	2.29848e-09
AT1G18270	13408.3	-1.89686	0.319983	-5.92798	3.06675e-09	8.41387e-08
AT1G18280	30.996	-3.84644	1.00852	-3.81395	0.000136765	0.00085618
AT1G18300	412.393	-0.933527	0.438916	-2.12689	0.033429	0.0742203
AT1G18330	3066.82	-1.56578	0.306883	-5.1022	3.3573e-07	5.14434e-06
AT1G18340	598.896	-0.481044	0.210389	-2.28645	0.0222278	0.0536221
AT1G18390	1237.29	-1.53583	0.318432	-4.82311	1.41339e-06	1.7914e-05
AT1G18480	1053.84	-0.798276	0.180834	-4.41441	1.01287e-05	9.54018e-05
AT1G18490	859.918	0.400065	0.137788	2.90348	0.00369044	0.012714
AT1G18500	5732.43	-0.7044	0.232359	-3.03152	0.00243327	0.00903092
AT1G18570	1312.03	-1.53644	0.483928	-3.17493	0.00149872	0.00610864
AT1G18660	4925.1	-0.635193	0.164965	-3.85048	0.000117888	0.000751709
AT1G18860	235.829	-1.01827	0.368033	-2.76679	0.00566104	0.0178578
AT1G19020	1532.15	-1.56705	0.52293	-2.99667	0.00272945	0.00996193
AT1G19080	670.514	-0.387265	0.194705	-1.98898	0.046703	0.0968152
AT1G19115	9.7372	-2.48404	1.16421	-2.13368	0.0328693	0.0733731
AT1G19140	2568.58	-0.667847	0.291639	-2.28997	0.0220228	0.0532638
AT1G19380	2087.97	-2.08642	0.371671	-5.61362	1.98138e-08	4.52771e-07
AT1G19400	3718.03	-0.490161	0.212835	-2.30302	0.021278	0.0517162
AT1G19530	1256.38	-2.10231	0.251987	-8.34292	7.24811e-17	9.89497e-15
AT1G19600	3558.2	-0.414627	0.190578	-2.17562	0.0295834	0.0672572
AT1G19660	9656.51	-0.526021	0.234703	-2.24122	0.025012	0.0589614
AT1G19680	2149.67	-0.559244	0.210778	-2.65324	0.00797226	0.0236348
AT1G19835	6844.04	0.418303	0.1848	2.26354	0.0236024	0.0563623
AT1G19920	5123.53	-0.550123	0.220938	-2.48994	0.0127763	0.0345345
AT1G20120	94.8188	-3.51114	0.600788	-5.84423	5.08929e-09	1.31659e-07
AT1G20180	83.0455	-1.88141	0.717657	-2.6216	0.00875192	0.0254996
AT1G20310	22.3902	-2.44711	0.978601	-2.50062	0.0123978	0.0337609
AT1G20560	2090.32	-0.700705	0.209608	-3.34293	0.000829	0.00376489
AT1G20630	2445.03	-1.1096	0.409294	-2.711	0.00670811	0.0205154
AT1G20690	204.849	-0.917034	0.389093	-2.35685	0.0184305	0.0462232
AT1G20693	9527.36	-1.06954	0.197398	-5.4182	6.02014e-08	1.19256e-06
AT1G20696	5372.39	-0.424695	0.196087	-2.16585	0.0303224	0.0686479
AT1G20770	1497.56	-0.340151	0.169512	-2.00665	0.0447868	0.0936655
AT1G20890	485.877	-0.625777	0.266353	-2.34943	0.0188024	0.046855
AT1G20950	3749.94	0.475269	0.173774	2.73499	0.0062383	0.0193449
AT1G20970	10773.8	-0.949272	0.27473	-3.45529	0.000549708	0.00268134
AT1G21100	1116.06	-2.03181	0.161644	-12.5696	3.10181e-36	8.78666e-33
AT1G21120	686.95	-2.02189	0.555251	-3.6414	0.000271155	0.00150537
AT1G21130	11508.1	-0.912737	0.293959	-3.10498	0.00190289	0.00742991
AT1G21160	2288.26	-0.555576	0.147515	-3.76623	0.000165734	0.00100586
AT1G21210	401.573	-2.86793	0.493156	-5.81546	6.0466e-09	1.54311e-07
AT1G21390	537.423	-1.05813	0.369366	-2.86472	0.0041738	0.0140922
AT1G21400	10416	-3.49126	0.350421	-9.96304	2.21192e-23	7.37154e-21
AT1G21410	1560.22	-0.73483	0.245219	-2.99663	0.00272984	0.00996193
AT1G21450	3264.74	-0.603052	0.1816	-3.32078	0.000897673	0.00401719
AT1G21520	374.75	-2.07891	0.441926	-4.7042	2.5486e-06	2.95581e-05
AT1G21550	738.816	-3.25369	0.86034	-3.78187	0.000155655	0.000954915
AT1G21670	1867.58	-1.9739	0.433936	-4.54884	5.39426e-06	5.63223e-05
AT1G21680	6999.45	-1.38711	0.466083	-2.97609	0.00291949	0.0105185
AT1G21900	2382.3	-0.550396	0.227612	-2.41813	0.0156003	0.0405523
AT1G21910	7609.85	-2.10272	0.543861	-3.86629	0.000110503	0.000714268
AT1G21920	5356.8	-0.283109	0.109906	-2.57592	0.0099974	0.0284482
AT1G22040	1033.31	-0.485668	0.178796	-2.71633	0.00660101	0.0202425
AT1G22110	159.463	-2.19188	0.549678	-3.98758	6.67519e-05	0.000466893
AT1G22230	264.693	0.418349	0.17569	2.38117	0.0172577	0.0439037
AT1G22280	2998.96	-1.09918	0.272812	-4.02907	5.59971e-05	0.000401585
AT1G22310	888.073	-0.664881	0.181887	-3.65546	0.000256718	0.00144295
AT1G22360	7656.18	-1.34575	0.366052	-3.67638	0.000236571	0.001345
AT1G22400	4640.71	-2.72923	0.390538	-6.9884	2.78042e-12	1.55965e-10
AT1G22410	10335.6	0.468776	0.164906	2.84269	0.00447348	0.014863
AT1G22430	3492.06	-0.649085	0.297476	-2.18198	0.0291113	0.0663702
AT1G22450	5619.52	0.428981	0.16354	2.6231	0.00871333	0.0254133
AT1G22490	260.608	-2.63002	0.502956	-5.22912	1.70315e-07	2.91077e-06
AT1G22500	3162.17	-2.09292	0.38801	-5.39398	6.89144e-08	1.34401e-06
AT1G22570	1914.74	-3.50105	0.350209	-9.99702	1.57051e-23	5.39257e-21
AT1G22620	3929.27	-0.421323	0.145507	-2.89556	0.00378487	0.0129801
AT1G22730	2188.54	-0.309219	0.116829	-2.64676	0.00812672	0.0239927
AT1G22750	3752.58	-0.607155	0.190584	-3.18577	0.00144371	0.00593135
AT1G22770	1739.62	-0.674932	0.222581	-3.0323	0.002427	0.00901355
AT1G22810	255.348	-2.7205	1.17365	-2.31799	0.0204501	0.0500583
AT1G22830	232.052	-0.677225	0.288087	-2.35077	0.0187348	0.0467233
AT1G22880	814.068	-0.665989	0.189803	-3.50885	0.000450054	0.0022695
AT1G22890	3032.18	-1.66025	0.361023	-4.59873	4.25071e-06	4.56538e-05
AT1G22900	92.0878	-1.32578	0.463256	-2.86188	0.00421136	0.0142021
AT1G23020	23145.9	-2.08297	0.308164	-6.7593	1.38663e-11	6.65759e-10
AT1G23150	848.199	-1.55237	0.319348	-4.86106	1.16758e-06	1.51372e-05
AT1G23160	22.8289	-1.94404	0.925414	-2.10073	0.0356649	0.0781056
AT1G23400	6553.7	-0.7532	0.287512	-2.61972	0.00880031	0.0256208
AT1G23550	455.42	-2.06919	0.484154	-4.27382	1.92148e-05	0.000164195
AT1G23710	1221.57	-1.55755	0.373101	-4.17461	2.98503e-05	0.000238529
AT1G23730	1926.81	-2.65517	0.804508	-3.30037	0.000965588	0.00426886
AT1G23780	1983.81	-0.528537	0.188224	-2.80802	0.00498468	0.0161652
AT1G23850	142.036	-0.639379	0.300559	-2.1273	0.033395	0.0742069
AT1G23870	8929.81	-1.23361	0.257816	-4.78484	1.71126e-06	2.09852e-05
AT1G23950	1252.6	-0.313909	0.146128	-2.14817	0.0316999	0.071127
AT1G24030	783.586	-2.61911	1.08853	-2.40609	0.0161241	0.0415704
AT1G24040	1585.79	-0.868326	0.202483	-4.28839	1.7997e-05	0.00015543
AT1G24090	259.176	-1.83954	0.441784	-4.16389	3.12874e-05	0.000247914
AT1G24160	8450.54	-1.16815	0.290408	-4.02246	5.75946e-05	0.000411738
AT1G24190	3447.96	-0.557748	0.268611	-2.07641	0.0378559	0.0818442
AT1G24267	1955.35	-0.330496	0.164373	-2.01065	0.0443629	0.0930192
AT1G24340	2406.02	-1.02678	0.210503	-4.87773	1.07316e-06	1.41395e-05
AT1G25275	12190.5	-1.54073	0.376106	-4.09654	4.19373e-05	0.000315114
AT1G25390	1187.76	-0.542779	0.234216	-2.31743	0.0204803	0.0500966
AT1G25400	3335.21	-2.50137	0.522123	-4.79078	1.66134e-06	2.05061e-05
AT1G25500	330.705	-0.442192	0.205259	-2.15431	0.031216	0.0702221
AT1G25520	2555.24	-0.580853	0.256569	-2.26393	0.0235787	0.0563389
AT1G26270	6577.33	-1.37247	0.35609	-3.85428	0.000116073	0.000741385
AT1G26380	997.737	-4.13053	0.802289	-5.14843	2.62676e-07	4.18619e-06
AT1G26390	648.539	-1.52666	0.650518	-2.34684	0.0189336	0.0470577
AT1G26420	574.504	-3.50156	0.664806	-5.26703	1.38645e-07	2.44703e-06
AT1G26580	7004.33	-0.707947	0.240993	-2.93762	0.00330742	0.011617
AT1G26665	1141.73	-1.60342	0.200594	-7.99337	1.31298e-15	1.41689e-13
AT1G26850	12721.8	-0.253234	0.122015	-2.07543	0.0379468	0.0820093
AT1G26920	2003.49	0.480736	0.161742	2.97223	0.00295644	0.0106213
AT1G27020	4655.83	-3.93889	0.371588	-10.6002	2.97426e-26	1.8723e-23
AT1G27290	7047.64	-0.782278	0.200505	-3.90153	9.55861e-05	0.000633754
AT1G27300	2084.48	-0.802058	0.248212	-3.23134	0.0012321	0.00519959
AT1G27470	1288.78	-1.19022	0.228052	-5.2191	1.79794e-07	3.04978e-06
AT1G27510	5400.32	-0.894813	0.282283	-3.16991	0.00152485	0.00619326
AT1G27630	1453.75	-0.871402	0.117602	-7.40974	1.26552e-13	9.50765e-12
AT1G27730	1202.63	-1.88809	0.566819	-3.33102	0.00086527	0.00390467
AT1G27770	4938.3	-0.738631	0.316901	-2.33079	0.0197642	0.0486632
AT1G27930	1636.46	-0.536747	0.179909	-2.98344	0.00285029	0.0103151
AT1G27940	394.551	-1.37461	0.688541	-1.99641	0.0458898	0.0954438
AT1G27970	5810.83	-0.755355	0.264971	-2.85071	0.00436214	0.0145761
AT1G28050	719.055	-0.443229	0.183673	-2.41315	0.0158153	0.0410076
AT1G28100	1239.97	-0.510418	0.226495	-2.25355	0.0242244	0.0574996
AT1G28120	2378.77	-0.644533	0.246729	-2.61231	0.00899325	0.026082
AT1G28140	4161.62	-0.81861	0.243299	-3.36463	0.000766461	0.00353039
AT1G28190	773.758	-2.72988	0.592943	-4.60395	4.14553e-06	4.46088e-05
AT1G28210	388.623	-1.45445	0.318544	-4.56594	4.97253e-06	5.24128e-05
AT1G28240	2664.24	-0.759604	0.176533	-4.3029	1.68574e-05	0.000147842
AT1G28260	2129.24	-1.41607	0.265459	-5.33443	9.58437e-08	1.79505e-06
AT1G28330	5879.55	-1.87245	0.371716	-5.03731	4.72108e-07	6.96543e-06
AT1G28520	3396.19	-1.02652	0.165577	-6.19965	5.65903e-10	1.85325e-08
AT1G28600	4133.07	-1.08475	0.421836	-2.57149	0.0101261	0.0287394
AT1G29060	488.423	-0.534996	0.218264	-2.45114	0.0142403	0.0375686
AT1G29120	2225.89	-0.584779	0.150012	-3.89821	9.69062e-05	0.000639717
AT1G29260	1877.7	-0.474845	0.202798	-2.34147	0.0192079	0.0475519
AT1G29290	149.718	-1.87722	0.746872	-2.51344	0.0119559	0.0327981
AT1G29710	225.645	-0.636756	0.250261	-2.54436	0.0109477	0.0306031
AT1G30000	1831.45	-0.557852	0.208532	-2.67513	0.00746993	0.0223802
AT1G30090	1530.63	-0.3265	0.125554	-2.60048	0.00930942	0.0267729
AT1G30210	1666.75	-1.04461	0.285427	-3.65982	0.000252391	0.00142069
AT1G30240	575.008	-1.03599	0.215004	-4.81845	1.4468e-06	1.82771e-05
AT1G30410	3649.77	-1.27706	0.254732	-5.01334	5.34932e-07	7.74115e-06
AT1G30475	410.963	-0.604298	0.292248	-2.06776	0.0386628	0.0833026
AT1G30610	1992.23	-0.564718	0.241296	-2.34035	0.0192657	0.0476532
AT1G30680	3186.41	-1.04772	0.238019	-4.40183	1.07342e-05	0.000100189
AT1G30720	2836.42	-3.35488	0.425008	-7.89368	2.93408e-15	2.89096e-13
AT1G30730	1999.88	-2.19855	0.278953	-7.88146	3.2357e-15	3.16067e-13
AT1G30810	1293.08	-0.469951	0.19784	-2.37541	0.0175294	0.0444626
AT1G30820	5946.5	-1.01097	0.302334	-3.3439	0.000826103	0.00375324
AT1G30880	3482.91	-1.00171	0.264522	-3.78687	0.00015256	0.000939487
AT1G30960	411.506	-1.45077	0.332612	-4.36176	1.29019e-05	0.000117047
AT1G30970	2688.91	-0.438311	0.14365	-3.05124	0.002279	0.0085792
AT1G31243	358.152	-3.07291	0.844585	-3.63837	0.000274373	0.001521
AT1G31420	9054.56	-0.309097	0.122639	-2.52039	0.0117226	0.0323342
AT1G31600	1966.21	-0.385307	0.11745	-3.28061	0.00103582	0.0045298
AT1G31800	7432.26	-0.695663	0.247004	-2.8164	0.00485645	0.0158401
AT1G31814	385.44	-0.573786	0.181791	-3.1563	0.00159787	0.0064272
AT1G32050	7198.19	-0.548408	0.115993	-4.72792	2.26828e-06	2.67171e-05
AT1G32090	2056.22	-0.687336	0.174481	-3.93932	8.17127e-05	0.000551451
AT1G32170	3011.49	-1.37566	0.451599	-3.0462	0.00231751	0.00869237
AT1G32210	1993.13	0.399725	0.187354	2.13352	0.0328817	0.0733865
AT1G32230	17694.3	-0.782208	0.111609	-7.00848	2.40922e-12	1.36495e-10
AT1G32350	804.234	-4.59345	0.958379	-4.79294	1.64355e-06	2.03309e-05
AT1G32440	3574.92	-0.454605	0.19277	-2.35828	0.0183601	0.0460668
AT1G32460	3581.42	-1.28133	0.24012	-5.3362	9.49122e-08	1.78453e-06
AT1G32500	5094.94	-0.442065	0.160493	-2.75442	0.00587963	0.0184141
AT1G32580	2380.13	-0.621867	0.207776	-2.99296	0.00276283	0.0100629
AT1G32790	8125.2	-0.558064	0.180173	-3.09737	0.00195246	0.00756353
AT1G32870	2162.96	-1.94384	0.375461	-5.17721	2.25227e-07	3.66673e-06
AT1G32920	3415.94	-1.43312	0.540514	-2.6514	0.00801595	0.0237275
AT1G32928	720.583	-1.58311	0.431533	-3.66858	0.000243902	0.00137976
AT1G32940	2439.22	-1.26005	0.509246	-2.47434	0.0133483	0.0357565
AT1G33030	314.131	-3.2505	0.66901	-4.85867	1.18177e-06	1.52687e-05
AT1G33040	3509.69	0.434266	0.174484	2.48885	0.0128156	0.0346241
AT1G33055	446.423	-2.27957	0.357065	-6.38419	1.72303e-10	6.34806e-09
AT1G33100	172.801	-1.96704	0.570255	-3.44941	0.000561814	0.00272981
AT1G33110	6076.38	-0.570806	0.237827	-2.40009	0.016391	0.0421147
AT1G33270	1460.8	-0.439169	0.208613	-2.10518	0.0352752	0.0773719
AT1G33420	554.031	-0.692619	0.20697	-3.34647	0.00081848	0.00372458
AT1G33490	2139.68	-1.06513	0.285508	-3.73065	0.000190987	0.00112482
AT1G33560	1982.73	-1.02978	0.318461	-3.23361	0.00122237	0.00516433
AT1G33600	3091.52	-1.38707	0.295227	-4.6983	2.62331e-06	3.02388e-05
AT1G33610	613.596	-0.750486	0.327639	-2.29059	0.021987	0.0531884
AT1G33790	1402.69	-3.15235	0.383297	-8.22429	1.96357e-16	2.52832e-14
AT1G33970	2176.97	-0.979892	0.206752	-4.73945	2.14298e-06	2.54263e-05
AT1G34110	1321.57	-0.430577	0.207204	-2.07804	0.0377059	0.0816134
AT1G34200	825.818	-0.847484	0.235627	-3.59671	0.000322263	0.0017306
AT1G34210	2207.42	-0.42792	0.174839	-2.44751	0.0143848	0.0378881
AT1G34220	2225.17	-0.521242	0.192015	-2.7146	0.00663567	0.0203243
AT1G34260	1802.23	-0.755144	0.24483	-3.08436	0.00203994	0.0078514
AT1G34300	1855.73	-0.74417	0.191558	-3.88483	0.000102402	0.00067109
AT1G34340	1696.21	-0.751377	0.17114	-4.39041	1.13136e-05	0.000104819
AT1G34550	2319.73	-0.855871	0.235847	-3.62893	0.000284598	0.00156619
AT1G35140	16116.5	-1.78887	0.609507	-2.93494	0.00333613	0.0116888
AT1G35160	4580.16	0.367296	0.183978	1.99641	0.0458888	0.0954438
AT1G35190	1865.81	-0.903563	0.305732	-2.95541	0.00312258	0.011102
AT1G35230	188.54	-2.22605	0.740355	-3.00673	0.00264072	0.00969292
AT1G35350	4618.1	-1.71453	0.317344	-5.40274	6.5632e-08	1.2822e-06
AT1G35580	10898.8	-0.939559	0.210537	-4.46267	8.09438e-06	7.97083e-05
AT1G35670	4204.25	-0.841063	0.286727	-2.93333	0.00335349	0.0117424
AT1G36050	4091.91	-1.23654	0.170989	-7.23167	4.77083e-13	3.08904e-11
AT1G36060	2773.53	-3.16181	0.3891	-8.12597	4.43791e-16	5.23812e-14
AT1G36070	1269.1	-1.10737	0.162216	-6.82654	8.69841e-12	4.41981e-10
AT1G36280	601.771	-0.710133	0.302333	-2.34884	0.0188319	0.046902
AT1G36320	5933.93	-0.789497	0.306829	-2.57309	0.0100796	0.028637
AT1G36622	214.244	-3.12092	0.818159	-3.81456	0.000136423	0.000854511
AT1G36640	26.5943	-2.66287	1.14836	-2.31884	0.0204037	0.0499772
AT1G37130	99806.3	-0.958367	0.23665	-4.04973	5.12767e-05	0.000373644
AT1G41880	9568.21	0.337801	0.119561	2.82535	0.0047229	0.0154917
AT1G42440	2673.26	-0.912686	0.198017	-4.60914	4.04334e-06	4.38003e-05
AT1G42470	2841.13	-0.415651	0.208376	-1.99471	0.0460744	0.0957749
AT1G43000	26.6205	-2.92666	1.13863	-2.57033	0.0101602	0.0287957
AT1G43160	632.578	-1.68655	0.446647	-3.77601	0.000159358	0.000974467
AT1G43890	3264	-0.510795	0.243699	-2.09601	0.0360817	0.0787295
AT1G44090	6.93566	-2.97242	1.32087	-2.25035	0.0244266	0.0578669
AT1G44350	2047.76	-0.716032	0.321153	-2.22957	0.0257761	0.0603198
AT1G44810	1602.47	-0.562329	0.230703	-2.43745	0.0147911	0.038769
AT1G45160	3035.71	-0.563704	0.135762	-4.15216	3.29355e-05	0.000258086
AT1G45230	2449.76	-0.968189	0.296797	-3.26213	0.0011058	0.00476236
AT1G45545	880.974	-2.89974	0.987395	-2.93676	0.00331664	0.0116349
AT1G45616	244.438	-2.93945	0.673128	-4.36685	1.26051e-05	0.000114722
AT1G46768	225.282	-0.646802	0.232909	-2.77706	0.00548525	0.0174001
AT1G47200	1612.07	0.371526	0.118028	3.14778	0.00164518	0.0065848
AT1G47280	30.7683	-5.70476	2.3721	-2.40494	0.0161749	0.0416635
AT1G47395	8699.29	-2.11659	0.737137	-2.87137	0.004087	0.0138404
AT1G47400	3925.56	-1.65541	0.583229	-2.83836	0.0045346	0.0149975
AT1G47510	319.637	-2.07658	0.874513	-2.37456	0.0175699	0.0445378
AT1G47570	1151.62	-0.651548	0.13348	-4.88123	1.05425e-06	1.3939e-05
AT1G47603	16.0188	-1.8505	0.776098	-2.38436	0.017109	0.0435841
AT1G47970	5150.41	-0.392691	0.173175	-2.2676	0.0233534	0.0558737
AT1G48030	17565.5	0.465106	0.201602	2.30705	0.0210522	0.0512443
AT1G48110	2060.48	-0.622729	0.176378	-3.53064	0.00041455	0.00212066
AT1G48140	548.022	0.332895	0.164675	2.02153	0.0432246	0.0909691
AT1G48200	378.009	0.402343	0.177149	2.2712	0.0231346	0.0554192
AT1G48300	33490.6	-0.843862	0.185438	-4.55064	5.34825e-06	5.60084e-05
AT1G48420	3402.64	0.206147	0.0953399	2.16223	0.0306001	0.0691248
AT1G48460	796.158	-0.547352	0.206017	-2.65682	0.0078881	0.0234286
AT1G48490	3434.72	-0.601609	0.14668	-4.10151	4.10455e-05	0.000310057
AT1G48570	1814.08	-1.20778	0.22007	-5.48816	4.06144e-08	8.4132e-07
AT1G48920	17514.7	-0.664343	0.151581	-4.38276	1.17188e-05	0.000107956
AT1G48970	1515.36	-0.766182	0.18665	-4.10492	4.04463e-05	0.000306298
AT1G49050	2337.39	-0.537929	0.216729	-2.48203	0.0130635	0.0351598
AT1G49150	62.6759	-2.09502	0.959797	-2.18277	0.0290526	0.066263
AT1G49160	855.281	-0.700664	0.31489	-2.22511	0.0260739	0.0608785
AT1G49180	988.194	-1.39221	0.275392	-5.05537	4.29547e-07	6.43809e-06
AT1G49240	20668.4	-0.517958	0.244865	-2.11528	0.0344062	0.0758772
AT1G49360	704.879	-0.30572	0.133731	-2.28608	0.0222496	0.0536619
AT1G49500	5530.33	-1.05806	0.293568	-3.60415	0.000313173	0.0016926
AT1G49510	2257.57	-0.644208	0.190201	-3.38698	0.000706667	0.00329245
AT1G49720	964.545	-2.55121	0.682483	-3.73813	0.000185395	0.0010987
AT1G50020	5828.7	-0.673504	0.293728	-2.29295	0.0218507	0.0529153
AT1G50260	1205.56	-0.759447	0.226501	-3.35295	0.000799564	0.00366055
AT1G50370	2622.57	-0.314013	0.15105	-2.07886	0.0376301	0.0814648
AT1G50400	104.127	-2.42562	0.649459	-3.73483	0.000187843	0.00110972
AT1G50410	2042.74	-0.587846	0.185975	-3.16088	0.00157293	0.00634719
AT1G50420	1211.34	-1.09735	0.253561	-4.32774	1.50647e-05	0.000133881
AT1G50430	4034.96	0.218918	0.0731274	2.99365	0.0027566	0.0100434
AT1G50640	2318.72	-0.71721	0.235202	-3.04934	0.00229348	0.00862017
AT1G50660	2665.11	0.253825	0.0876578	2.89564	0.00378392	0.0129801
AT1G50890	576.635	0.490651	0.231424	2.12014	0.0339942	0.0751881
AT1G51090	73.6042	-2.76103	1.14634	-2.40856	0.0160154	0.0413749
AT1G51270	1134.22	-1.816	0.234738	-7.73625	1.0239e-14	9.06394e-13
AT1G51310	1798.48	-1.11221	0.279678	-3.97675	6.98621e-05	0.000484565
AT1G51380	209.824	-1.58477	0.415538	-3.81377	0.00013686	0.000856302
AT1G51590	2091.83	-0.4335	0.206295	-2.10136	0.0356098	0.0780302
AT1G51620	181.284	-1.92301	0.458121	-4.1976	2.69757e-05	0.000218174
AT1G51720	2337.4	-0.361575	0.1268	-2.85154	0.0043508	0.0145425
AT1G51730	3451.78	-0.570343	0.204571	-2.78799	0.00530355	0.0169567
AT1G51790	622.609	-1.82332	0.547534	-3.33005	0.00086829	0.00391197
AT1G51800	1393.95	-1.44661	0.632358	-2.28765	0.022158	0.0535222
AT1G51820	870.717	-2.14655	0.56744	-3.78286	0.000155038	0.000953403
AT1G51880	317.02	-0.989159	0.501128	-1.97386	0.0483972	0.0996853
AT1G51890	872.602	-2.50994	0.602964	-4.16268	3.14534e-05	0.000248899
AT1G51913	9.06839	-2.22533	1.11648	-1.99317	0.0462426	0.0960893
AT1G51920	24.9368	-4.00877	1.337	-2.99834	0.00271451	0.00991672
AT1G51965	658.999	-0.852929	0.227226	-3.75365	0.000174278	0.00104594
AT1G52100	1769.74	-4.35967	0.428386	-10.177	2.51273e-24	1.13887e-21
AT1G52240	436.097	-1.11341	0.421703	-2.64027	0.00828409	0.0243368
AT1G52260	778.145	-0.602259	0.250861	-2.40077	0.0163608	0.0420467
AT1G52343	86.226	-1.07667	0.4988	-2.15851	0.0308878	0.0696498
AT1G52590	1307.9	-0.736582	0.267039	-2.75833	0.00580974	0.0182254
AT1G52980	5100.97	-0.351099	0.108612	-3.23259	0.00122671	0.0051788
AT1G53030	880.603	-1.21105	0.388859	-3.11437	0.00184339	0.00722748
AT1G53090	1572.91	-0.814991	0.230224	-3.53999	0.000400139	0.0020609
AT1G53200	597.825	-1.39427	0.268277	-5.19715	2.02367e-07	3.35728e-06
AT1G53250	752.89	-0.573429	0.27522	-2.08353	0.0372031	0.0806946
AT1G53320	2237.62	-0.351586	0.134581	-2.61244	0.00898993	0.0260791
AT1G53330	85.5652	-1.70569	0.494451	-3.44966	0.000561291	0.0027288
AT1G53390	1997.37	-0.633713	0.19832	-3.1954	0.00139637	0.00576615
AT1G53400	1900.24	-0.580437	0.23935	-2.42505	0.0153063	0.0398885
AT1G53430	5257.41	-0.625558	0.21674	-2.88621	0.00389911	0.0132914
AT1G53440	4007.81	-1.04166	0.16072	-6.48118	9.10052e-11	3.59296e-09
AT1G53540	105.478	-2.99938	0.829583	-3.61553	0.000299737	0.00163363
AT1G53560	1867.37	-0.861843	0.328729	-2.62174	0.00874816	0.0254952
AT1G53625	382.396	-1.75521	0.690942	-2.54032	0.0110752	0.030864
AT1G53670	5921.65	-0.898339	0.282434	-3.1807	0.00146919	0.00600557
AT1G53720	1228.48	-0.227451	0.112256	-2.02618	0.0427468	0.0902317
AT1G53760	933.583	-0.694843	0.17761	-3.91218	9.14665e-05	0.000609651
AT1G53780	6761.52	-1.00831	0.200434	-5.03064	4.88857e-07	7.1659e-06
AT1G53990	68.2534	-2.1306	0.478903	-4.44893	8.62998e-06	8.38647e-05
AT1G54010	3286.73	-1.40251	0.518542	-2.70473	0.00683607	0.0208336
AT1G54090	1863.43	-0.446364	0.188886	-2.36314	0.0181208	0.0455774
AT1G54100	17397.2	-1.79418	0.309696	-5.79335	6.89968e-09	1.7451e-07
AT1G54130	5299.01	-0.60598	0.228328	-2.65399	0.00795465	0.0235892
AT1G54570	3151.18	-2.13989	0.451528	-4.73923	2.14535e-06	2.54278e-05
AT1G54575	1025.36	-1.89399	0.605415	-3.12841	0.00175753	0.00696072
AT1G54710	2013.82	-0.235565	0.0966418	-2.43751	0.0147889	0.038769
AT1G54840	276.46	-3.59381	1.04529	-3.43809	0.000585834	0.00281992
AT1G55080	743.197	-0.391208	0.188913	-2.07083	0.0383744	0.0827599
AT1G55110	1640.97	-1.07177	0.257178	-4.16742	3.08061e-05	0.000244786
AT1G55150	1407.45	-0.392859	0.169443	-2.31853	0.0204203	0.0499963
AT1G55170	544.158	-0.588842	0.183876	-3.2024	0.0013629	0.00565677
AT1G55340	1789.54	-0.435193	0.181922	-2.3922	0.0167479	0.0428085
AT1G55360	8800.99	-0.571955	0.238838	-2.39474	0.0166323	0.0425612
AT1G55380	380.511	-1.29444	0.511603	-2.53017	0.0114007	0.0315724
AT1G55440	222.146	-2.60097	0.442319	-5.8803	4.09519e-09	1.08417e-07
AT1G55450	5505.72	-0.839293	0.336277	-2.49584	0.0125659	0.0341041
AT1G55510	1889.64	-1.6428	0.361893	-4.53945	5.64018e-06	5.83642e-05
AT1G55810	2984.54	-2.1073	0.311289	-6.76961	1.29127e-11	6.22611e-10
AT1G55850	5301.43	-0.906954	0.256679	-3.53341	0.000410232	0.00210235
AT1G55900	970.239	-0.760056	0.215093	-3.53362	0.000409912	0.00210168
AT1G55920	3355.03	-0.833393	0.204685	-4.07158	4.66957e-05	0.000346276
AT1G55930	1276.35	-1.13621	0.252968	-4.49152	7.07171e-06	7.14167e-05
AT1G56010	1581.04	-1.05793	0.285773	-3.702	0.000213904	0.0012366
AT1G56060	149.467	-4.12852	0.780686	-5.28833	1.2344e-07	2.21664e-06
AT1G56145	2426.19	-1.21013	0.232694	-5.20053	1.9872e-07	3.31132e-06
AT1G56150	579.474	-1.42655	0.455036	-3.13502	0.00171844	0.00682737
AT1G56180	2026.58	-0.876354	0.284321	-3.08227	0.00205428	0.00789225
AT1G56200	9176.16	-1.15459	0.371997	-3.10375	0.00191083	0.00745322
AT1G56280	26370.7	-1.70123	0.249188	-6.82709	8.66524e-12	4.41981e-10
AT1G56300	1229.6	-1.974	0.765401	-2.57904	0.00990739	0.0282275
AT1G56560	1623.58	-0.554677	0.221329	-2.50612	0.0122064	0.0333519
AT1G56700	4132.6	-0.873816	0.219225	-3.98594	6.72146e-05	0.00046926
AT1G57990	8774.34	-0.985501	0.466973	-2.1104	0.0348236	0.0765591
AT1G58025	1708.32	-0.799548	0.173368	-4.61185	3.99104e-06	4.34253e-05
AT1G58110	1520.86	-0.388074	0.150824	-2.57302	0.0100815	0.028637
AT1G58180	6087.65	-2.29527	0.30262	-7.58464	3.334e-14	2.84042e-12
AT1G58190	1177.76	-2.5031	0.465968	-5.37182	7.79469e-08	1.51236e-06
AT1G58340	256.08	-1.99758	0.540583	-3.69524	0.000219681	0.00126484
AT1G58410	165.126	-1.79197	0.765925	-2.33962	0.0193035	0.0477363
AT1G58420	55.3554	-1.44296	0.681463	-2.11744	0.0342224	0.07556
AT1G58470	373.186	-0.959727	0.301874	-3.17923	0.00147665	0.00603171
AT1G59590	1233.99	-1.36615	0.418185	-3.26685	0.00108752	0.00469973
AT1G59840	2072.65	-0.561063	0.282703	-1.98464	0.0471848	0.0976531
AT1G59870	46862.9	-1.3379	0.2622	-5.10259	3.35031e-07	5.14395e-06
AT1G60000	3779.25	0.372898	0.167078	2.23188	0.0256229	0.0601341
AT1G60010	3177.02	0.467709	0.172966	2.70405	0.00684997	0.0208648
AT1G60080	452.374	-1.17658	0.304019	-3.8701	0.000108793	0.000705224
AT1G60110	772.483	-3.51175	0.614673	-5.71319	1.10875e-08	2.69019e-07
AT1G60140	8679.48	-1.39717	0.270358	-5.16785	2.36807e-07	3.83871e-06
AT1G60160	2973.75	-0.986543	0.242938	-4.06088	4.88882e-05	0.000358545
AT1G60170	3534.99	-0.422922	0.149289	-2.8329	0.00461271	0.0151894
AT1G60200	8066.63	-0.405742	0.199719	-2.03157	0.0421976	0.0893387
AT1G60450	100.98	-10.2507	1.9752	-5.1897	2.10632e-07	3.47405e-06
AT1G60600	2217.65	-0.715889	0.262339	-2.72887	0.00635523	0.0196162
AT1G60650	1267.78	-0.598935	0.23322	-2.56811	0.0102256	0.0289375
AT1G60730	8145.37	-2.25141	0.49943	-4.50797	6.54513e-06	6.66826e-05
AT1G60900	4706.23	-0.42584	0.145665	-2.92343	0.00346202	0.0120516
AT1G60940	6501.05	-0.359181	0.11587	-3.09986	0.00193611	0.00751561
AT1G61340	611.495	-2.91831	0.533924	-5.46578	4.60868e-08	9.34186e-07
AT1G61360	767.336	-0.845634	0.327016	-2.58591	0.00971229	0.0277134
AT1G61380	1278.01	-2.01859	0.251092	-8.03924	9.03958e-16	1.00419e-13
AT1G61740	5989.08	-1.15755	0.18478	-6.2645	3.74024e-10	1.27269e-08
AT1G61750	37.5813	-3.3675	0.674591	-4.99191	5.97846e-07	8.48348e-06
AT1G61790	4872.26	-0.39196	0.134683	-2.91024	0.00361155	0.012484
AT1G61800	546.093	-4.8267	0.878002	-5.49736	3.85512e-08	8.02985e-07
AT1G61810	394.769	-2.33345	0.550704	-4.23721	2.26313e-05	0.00018851
AT1G61820	1862.96	-2.18459	0.507844	-4.30169	1.695e-05	0.000148424
AT1G61850	3192.96	-0.438637	0.193571	-2.26603	0.0234495	0.056068
AT1G61980	458.343	-0.807129	0.191621	-4.21211	2.53002e-05	0.00020639
AT1G62290	287.819	-1.18502	0.329637	-3.59491	0.000324508	0.00174139
AT1G62300	2407.07	-1.79147	0.428533	-4.18047	2.90903e-05	0.000233279
AT1G62390	9505.01	-0.663846	0.181424	-3.65909	0.000253117	0.00142406
AT1G62420	7041.36	-2.97618	0.530875	-5.60618	2.06847e-08	4.68756e-07
AT1G62422	978.459	-1.02289	0.358431	-2.8538	0.00431998	0.0144683
AT1G62480	19721.4	-1.3231	0.305757	-4.3273	1.50948e-05	0.000133919
AT1G62510	10456.6	-3.84887	0.630422	-6.10523	1.02653e-09	3.15419e-08
AT1G62810	1986.55	-1.47748	0.222857	-6.62972	3.36314e-11	1.46568e-09
AT1G63090	4158.21	-1.80723	0.341254	-5.29585	1.18462e-07	2.14423e-06
AT1G63180	1234.94	-1.96938	0.30026	-6.55892	5.42002e-11	2.2414e-09
AT1G63340	103.415	-23.5481	3.67878	-6.40104	1.54319e-10	5.77093e-09
AT1G63500	2595.87	-0.392667	0.177507	-2.21212	0.0269586	0.0624914
AT1G63580	45.6638	-1.51723	0.609861	-2.48783	0.0128525	0.0346848
AT1G63660	2289.97	-0.375706	0.141612	-2.65307	0.0079763	0.0236348
AT1G63720	503.811	-1.02642	0.42458	-2.4175	0.0156277	0.040595
AT1G63980	8492.18	-1.53458	0.224888	-6.82374	8.87009e-12	4.46698e-10
AT1G64040	4236.68	-0.711708	0.171239	-4.15623	3.23547e-05	0.000254414
AT1G64160	106.86	-2.93196	0.791058	-3.70638	0.000210243	0.00121917
AT1G64170	1107.83	-1.92191	0.562571	-3.41631	0.000634765	0.00301447
AT1G64180	334.693	-0.493587	0.181205	-2.72391	0.00645138	0.0198481
AT1G64220	240.641	-2.162	0.43117	-5.01425	5.32403e-07	7.72692e-06
AT1G64610	804.138	-0.78309	0.317781	-2.46425	0.0137302	0.036571
AT1G64660	6194.16	-2.80514	0.555208	-5.0524	4.36288e-07	6.52187e-06
AT1G64760	418.859	-0.502021	0.174729	-2.87315	0.00406403	0.0137784
AT1G64820	6.17338	-2.79512	1.31949	-2.11833	0.0341474	0.0754238
AT1G64900	2645.42	-1.19829	0.30651	-3.90948	9.24969e-05	0.000615794
AT1G64930	461.179	-1.98262	0.727592	-2.72491	0.00643187	0.019815
AT1G64950	3846.47	-1.25827	0.311933	-4.03379	5.48836e-05	0.000394849
AT1G64980	7287.98	-1.43486	0.333751	-4.29919	1.71426e-05	0.000149417
AT1G65030	546.681	-0.808608	0.214268	-3.77382	0.000160765	0.00098095
AT1G65070	2018.98	-0.801116	0.215355	-3.71998	0.000199235	0.00116195
AT1G65280	3686.68	-0.684947	0.20685	-3.31132	0.000928556	0.00413076
AT1G65470	724.652	-0.549212	0.268147	-2.04818	0.0405426	0.0865148
AT1G65481	131.902	-2.273	0.903294	-2.51635	0.0118578	0.032612
AT1G65500	356.873	-2.46415	0.752303	-3.27547	0.00105486	0.0045901
AT1G65510	849.799	-2.37661	0.393042	-6.04672	1.47826e-09	4.39636e-08
AT1G65580	3700.12	-0.43086	0.183366	-2.34972	0.0187874	0.046828
AT1G65610	1875.44	-0.909195	0.419459	-2.16754	0.0301933	0.0684378
AT1G65660	3430.66	-0.686298	0.214721	-3.19624	0.00139233	0.00575156
AT1G65845	1736.27	-3.32417	0.39756	-8.36142	6.19664e-17	8.70296e-15
AT1G65930	55212.5	-0.699059	0.216995	-3.22154	0.00127505	0.00533711
AT1G65970	5225.91	-4.27718	0.613184	-6.97536	3.05083e-12	1.67811e-10
AT1G66050	930.251	-3.4469	0.97093	-3.5501	0.000385082	0.00200173
AT1G66070	1314.48	-0.641497	0.206744	-3.10285	0.00191664	0.00746735
AT1G66180	7951.36	-1.29426	0.370444	-3.49382	0.000476166	0.00236954
AT1G66230	598.164	-0.915547	0.220249	-4.15687	3.22637e-05	0.000253875
AT1G66340	2029.58	-0.626164	0.138197	-4.53096	5.87155e-06	6.04823e-05
AT1G66540	272.298	-2.00081	0.271132	-7.37946	1.58936e-13	1.16942e-11
AT1G66580	20027.5	-0.927836	0.33002	-2.81145	0.00493187	0.0160399
AT1G66650	37.9043	-1.27733	0.60132	-2.12421	0.0336523	0.0746213
AT1G66760	2795.75	-0.974464	0.228457	-4.26542	1.99522e-05	0.000169094
AT1G66780	14.1097	-2.19781	0.779946	-2.8179	0.00483396	0.015794
AT1G66920	579.953	-1.83917	0.461116	-3.98852	6.64854e-05	0.000465778
AT1G66980	2809.16	-0.733403	0.256894	-2.85489	0.00430517	0.0144453
AT1G67070	790.966	-1.80109	0.366236	-4.91785	8.75018e-07	1.18174e-05
AT1G67100	48.867	-2.74616	1.08538	-2.53014	0.0114018	0.0315724
AT1G67120	5291.18	-1.14729	0.319578	-3.59002	0.000330647	0.00176806
AT1G67170	618.714	-0.334543	0.113265	-2.95363	0.00314059	0.011145
AT1G67250	2334.93	0.497134	0.189221	2.62727	0.00860742	0.0251478
AT1G67265	59.1526	-5.21991	0.692782	-7.53471	4.89416e-14	4.10783e-12
AT1G67470	466.075	-1.19634	0.327782	-3.64981	0.000262437	0.00146848
AT1G67550	1903.76	-0.276839	0.140376	-1.97212	0.0485959	0.0999891
AT1G67720	1004.07	-0.357241	0.167472	-2.13314	0.0329136	0.0734292
AT1G67810	359.104	-0.839577	0.402819	-2.08425	0.0371372	0.0806117
AT1G67856	379.651	-1.85949	0.732875	-2.53726	0.0111725	0.0310665
AT1G67970	461.6	-2.26719	0.416898	-5.43822	5.38151e-08	1.07735e-06
AT1G68320	239.344	-3.08275	1.00201	-3.07656	0.00209407	0.00802159
AT1G68410	4132.56	-1.22549	0.348094	-3.52057	0.000430621	0.0021861
AT1G68620	776.308	-1.9315	0.472074	-4.09152	4.28546e-05	0.00032053
AT1G68690	1077.16	-1.19597	0.309986	-3.85816	0.000114246	0.00073427
AT1G68730	702.399	-0.482066	0.216062	-2.23115	0.0256714	0.0601743
AT1G68765	45.5684	-3.62204	1.145	-3.16336	0.00155961	0.00630464
AT1G68940	941.744	-0.57875	0.232079	-2.49377	0.0126396	0.0342384
AT1G69070	1931.72	-1.01074	0.236586	-4.2722	1.93553e-05	0.000165147
AT1G69340	3385.35	-0.295332	0.0816785	-3.61579	0.000299438	0.00163279
AT1G69410	4482.42	-0.875972	0.386087	-2.26884	0.0232778	0.0557281
AT1G69750	1187.99	-1.22838	0.395003	-3.10981	0.00187209	0.00732229
AT1G69760	1222.36	-0.890844	0.397259	-2.24248	0.0249306	0.0588272
AT1G69830	6709.08	-1.27266	0.247152	-5.14932	2.61439e-07	4.17824e-06
AT1G69850	5592.74	-1.36178	0.273664	-4.9761	6.48782e-07	9.08696e-06
AT1G69880	1779.62	-2.19744	0.724023	-3.03504	0.00240501	0.0089436
AT1G69890	2142.43	-2.19184	0.48936	-4.47898	7.5e-06	7.50066e-05
AT1G69900	581.01	-1.19777	0.445272	-2.68997	0.00714582	0.0216087
AT1G69920	198.628	-2.89684	0.930028	-3.11479	0.00184077	0.00721972
AT1G69930	176.112	-5.07084	0.914896	-5.54253	2.98125e-08	6.42217e-07
AT1G69935	1304.52	-0.522334	0.188478	-2.77132	0.00558291	0.0176408
AT1G70060	3990.96	-0.656603	0.221427	-2.96533	0.00302358	0.0108179
AT1G70200	3394.37	-0.895495	0.356216	-2.51391	0.01194	0.0327742
AT1G70310	6248.81	-0.694589	0.172383	-4.02934	5.59343e-05	0.000401388
AT1G70350	539.464	-0.377363	0.1822	-2.07115	0.0383448	0.0827117
AT1G70480	1855.76	-0.318797	0.111421	-2.86119	0.00422048	0.014225
AT1G70490	10575.2	0.432268	0.175601	2.46165	0.01383	0.0367773
AT1G70530	3021.63	-0.833135	0.223456	-3.72841	0.000192691	0.00113246
AT1G70630	292.159	-0.553117	0.226214	-2.4451	0.0144811	0.0381062
AT1G70780	10534.4	-1.38974	0.319527	-4.34938	1.36521e-05	0.000123163
AT1G70980	1767.43	-0.687449	0.219258	-3.13535	0.00171651	0.00682208
AT1G71015	478.7	-2.95488	1.15602	-2.55608	0.0105859	0.02974
AT1G71030	3242.35	-2.21312	0.477607	-4.63376	3.59089e-06	3.99689e-05
AT1G71040	4282.3	-1.13274	0.323049	-3.50639	0.000454223	0.00228544
AT1G71090	2427.95	-0.570141	0.202892	-2.81007	0.00495315	0.0160768
AT1G71140	1208.13	-1.13893	0.367902	-3.09574	0.00196325	0.00760015
AT1G71210	713.54	-1.1761	0.268342	-4.38285	1.17137e-05	0.000107956
AT1G71360	737.883	-0.392671	0.189253	-2.07485	0.0380005	0.0821098
AT1G71520	62.5384	-2.81583	1.06786	-2.63689	0.00836709	0.0245552
AT1G71710	1942.01	-0.372131	0.167051	-2.22764	0.0259045	0.0605703
AT1G71780	754.327	0.423974	0.161623	2.62322	0.00871021	0.0254108
AT1G71820	4868.82	-0.479367	0.163126	-2.93863	0.00329661	0.0115862
AT1G71980	4555.62	-0.840214	0.138866	-6.05056	1.44346e-09	4.32695e-08
AT1G72060	1095.74	-3.30002	0.346768	-9.51649	1.7912e-21	4.22835e-19
AT1G72070	671.45	-3.09295	0.421397	-7.33976	2.13971e-13	1.47836e-11
AT1G72160	9923.06	-1.21296	0.203544	-5.95919	2.53498e-09	7.12751e-08
AT1G72330	1547.52	-2.24507	0.24003	-9.35326	8.49848e-21	1.78326e-18
AT1G72416	1855.96	-1.74143	0.610961	-2.85032	0.00436752	0.0145897
AT1G72680	4447.07	-2.43446	0.379647	-6.41244	1.43209e-10	5.39102e-09
AT1G72710	10315	-0.95704	0.151262	-6.32702	2.49935e-10	8.82248e-09
AT1G72790	1585.85	-1.4094	0.422085	-3.33913	0.000840405	0.0038121
AT1G72880	2240.04	0.278327	0.117163	2.37555	0.0175229	0.0444585
AT1G72900	4184.57	-2.77682	0.581352	-4.77649	1.78378e-06	2.16635e-05
AT1G73000	55.6441	-1.40848	0.525195	-2.68182	0.00732224	0.022025
AT1G73030	4090.23	-0.424772	0.15823	-2.68452	0.00726344	0.0218888
AT1G73040	170.179	-1.89637	0.745334	-2.54432	0.0109491	0.0306031
AT1G73260	8269.26	-1.7512	0.541358	-3.23483	0.00121717	0.00515193
AT1G73300	816.951	-2.45422	0.898561	-2.73127	0.00630899	0.0195035
AT1G73490	2349.64	-0.582191	0.198484	-2.93319	0.00335504	0.0117442
AT1G73650	4494.99	-0.658057	0.215924	-3.04763	0.00230656	0.00865703
AT1G73680	3067.76	-1.31525	0.278454	-4.72342	2.31913e-06	2.72312e-05
AT1G73710	973.639	-0.713215	0.196096	-3.63706	0.000275763	0.00152721
AT1G73730	1176.36	-0.596784	0.178899	-3.33587	0.000850315	0.00385089
AT1G73880	554.637	-0.661715	0.279144	-2.37051	0.0177634	0.0448879
AT1G73920	8280.17	-0.688488	0.176719	-3.89594	9.78189e-05	0.000644305
AT1G73990	5311.12	-0.650648	0.254343	-2.55815	0.010523	0.0295944
AT1G74150	87.6094	-0.897764	0.337365	-2.66111	0.00778841	0.0231507
AT1G74360	1098.95	-1.52759	0.484354	-3.15388	0.00161117	0.00646695
AT1G74450	2678.7	-1.03129	0.315259	-3.27125	0.00107074	0.00464316
AT1G74780	853.571	-0.858167	0.164504	-5.21669	1.82144e-07	3.07124e-06
AT1G74790	4532.17	-1.36726	0.179791	-7.60471	2.85549e-14	2.45118e-12
AT1G75110	529.206	-3.37912	1.15108	-2.93561	0.00332895	0.0116709
AT1G75120	376.366	-0.507783	0.239924	-2.11644	0.0343076	0.0757187
AT1G75190	590.948	-1.3217	0.249316	-5.30131	1.14974e-07	2.09113e-06
AT1G75220	13362.5	-1.76416	0.268645	-6.56686	5.13881e-11	2.14073e-09
AT1G75290	830.537	-2.95861	1.02432	-2.88836	0.00387252	0.0132287
AT1G75310	3311.13	-0.64654	0.25159	-2.56982	0.0101752	0.0288232
AT1G75380	19518.1	-0.65704	0.184414	-3.56285	0.000366846	0.0019253
AT1G75400	1600.66	0.330724	0.11589	2.85379	0.00432012	0.0144683
AT1G75670	507.423	-1.22768	0.398091	-3.08392	0.00204291	0.00786019
AT1G75730	1501.33	-1.86222	0.29006	-6.42011	1.36178e-10	5.1954e-09
AT1G75750	62146.4	-3.58844	0.435888	-8.23247	1.83393e-16	2.38853e-14
AT1G75760	2632.59	-1.03226	0.231736	-4.45448	8.40966e-06	8.21465e-05
AT1G75770	848.144	-0.895603	0.383937	-2.33268	0.019665	0.048461
AT1G75860	892.505	-0.952159	0.287767	-3.30878	0.000937029	0.00416535
AT1G75880	226.218	-1.59313	0.436785	-3.64741	0.000264896	0.00147859
AT1G75900	1046.33	-1.27475	0.389988	-3.26868	0.00108052	0.00467662
AT1G76030	12282.8	-0.34465	0.168936	-2.04013	0.0413377	0.08783
AT1G76065	181.426	-0.979913	0.375931	-2.60663	0.00914374	0.026444
AT1G76210	38.8143	-2.42802	0.832319	-2.91717	0.0035322	0.0122583
AT1G76410	284.557	-2.23453	0.485125	-4.60608	4.10328e-06	4.42925e-05
AT1G76470	130.282	-1.59098	0.713328	-2.23036	0.0257234	0.0602587
AT1G76520	6618.1	-1.6317	0.328681	-4.96439	6.89169e-07	9.56983e-06
AT1G76550	1903.51	0.409417	0.195018	2.09938	0.0357832	0.0782589
AT1G76580	1891.45	-0.768342	0.179437	-4.28196	1.85257e-05	0.000159389
AT1G76590	1032.05	-3.20667	0.349778	-9.16772	4.83129e-20	9.27854e-18
AT1G76600	2054.83	-2.19028	0.416649	-5.25691	1.46497e-07	2.54985e-06
AT1G76640	78.9753	-4.21501	1.34751	-3.12798	0.00176009	0.00696433
AT1G76680	11127.4	-1.38105	0.389322	-3.54732	0.000389175	0.00201819
AT1G76700	1892.31	-0.829178	0.270204	-3.06872	0.00214982	0.00819911
AT1G76880	2770.39	0.248362	0.103589	2.39758	0.0165038	0.0423279
AT1G76930	100531	-2.7772	0.495951	-5.59975	2.14658e-08	4.81643e-07
AT1G76970	874.417	-0.820016	0.303103	-2.7054	0.00682223	0.0208089
AT1G77120	3208.8	-2.49664	0.716079	-3.48654	0.00048931	0.00242536
AT1G77150	58.0399	-7.25425	1.71459	-4.23089	2.32772e-05	0.000192803
AT1G77210	5002.66	-1.75296	0.40262	-4.35388	1.33749e-05	0.000120854
AT1G77380	554.236	-1.83558	0.400836	-4.57937	4.66379e-06	4.95736e-05
AT1G77510	2727.79	-0.582139	0.287261	-2.02651	0.0427121	0.0901995
AT1G77630	903.368	-0.570053	0.259132	-2.19986	0.0278171	0.0640251
AT1G77640	1034.66	-3.81726	0.681766	-5.59908	2.15492e-08	4.82557e-07
AT1G77760	10810.5	-1.52887	0.319795	-4.78077	1.74622e-06	2.12986e-05
AT1G78080	13623.5	-0.828821	0.275024	-3.01363	0.00258142	0.00950913
AT1G78140	4787.8	-1.33586	0.326795	-4.08777	4.35548e-05	0.000324897
AT1G78240	5692.32	-1.34821	0.261568	-5.15432	2.54557e-07	4.08553e-06
AT1G78280	2721.97	-0.782959	0.197581	-3.96272	7.40999e-05	0.000508864
AT1G78290	2445.59	-0.983259	0.192531	-5.10701	3.27301e-07	5.05955e-06
AT1G78300	6354.85	0.414708	0.170295	2.43523	0.0148824	0.0389541
AT1G78410	181.966	-3.54119	0.904568	-3.91479	9.04837e-05	0.000604345
AT1G78420	2337.81	-0.611864	0.1994	-3.06853	0.00215112	0.00820134
AT1G78460	4658.56	-1.14577	0.259211	-4.42024	9.85925e-06	9.35638e-05
AT1G78510	3237.25	-0.614653	0.285232	-2.15492	0.0311678	0.0701414
AT1G78590	748.966	-0.871913	0.253628	-3.43777	0.000586533	0.00282088
AT1G78600	1623.34	-1.92359	0.212408	-9.05609	1.35205e-19	2.35694e-17
AT1G78720	119.936	-4.6659	0.769259	-6.06545	1.31582e-09	3.97587e-08
AT1G78830	31338	-1.197	0.413116	-2.8975	0.00376149	0.0129078
AT1G78860	612.889	-1.69753	0.607064	-2.7963	0.00516918	0.0166232
AT1G78870	3285.49	-0.386486	0.109644	-3.52493	0.00042359	0.002163
AT1G78890	2406.35	-0.552723	0.208216	-2.65456	0.0079411	0.0235675
AT1G79020	946.103	-0.303179	0.121566	-2.49395	0.0126331	0.034229
AT1G79050	2171.02	-0.733285	0.266745	-2.74901	0.00597752	0.0186793
AT1G79130	14.7389	-2.76215	1.21908	-2.26576	0.023466	0.0560957
AT1G79150	1088.56	-0.866204	0.28755	-3.01236	0.00259223	0.00953963
AT1G79190	943.928	-0.476667	0.190731	-2.49916	0.0124489	0.0338675
AT1G79440	2938.57	-1.21893	0.136789	-8.91105	5.05495e-19	8.42319e-17
AT1G79630	957.303	-0.351131	0.165984	-2.11546	0.0343912	0.0758735
AT1G79640	684.39	-0.652935	0.211538	-3.08661	0.00202455	0.0078081
AT1G79680	232.161	-4.52866	0.910427	-4.97422	6.55106e-07	9.1642e-06
AT1G79710	667.523	-0.619891	0.229491	-2.70115	0.00691001	0.0210138
AT1G79740	1494.68	-0.465651	0.17356	-2.68294	0.00729779	0.0219716
AT1G79950	2232.04	-0.638547	0.142424	-4.48341	7.34609e-06	7.35973e-05
AT1G80030	5238.14	-0.466114	0.235644	-1.97805	0.0479235	0.0989651
AT1G80190	835.006	-1.00412	0.298257	-3.36663	0.000760929	0.00350777
AT1G80245	417.125	-0.953535	0.220939	-4.31582	1.5901e-05	0.000140542
AT1G80300	4756.81	-0.705722	0.299793	-2.35403	0.018571	0.0464317
AT1G80380	22233.6	-0.959483	0.356613	-2.69054	0.00713362	0.0215837
AT1G80510	903.355	-0.587231	0.236419	-2.48386	0.0129968	0.0350135
AT1G80750	2053.68	-0.616758	0.238085	-2.5905	0.00958366	0.0274362
AT1G80840	1353.88	-3.00355	0.551597	-5.44519	5.17492e-08	1.03782e-06
AT1G80890	721.116	-0.633164	0.217903	-2.90572	0.00366414	0.0126426
AT1G80920	25378.3	-1.44783	0.216724	-6.68052	2.38094e-11	1.07914e-09
AT1G80930	6255.65	-0.546905	0.196096	-2.78896	0.00528773	0.0169157
AT2G01260	1517.47	-0.309962	0.1377	-2.25099	0.0243864	0.0577948
AT2G01290	1219.65	-0.746746	0.198383	-3.76417	0.000167102	0.00101145
AT2G01440	1744.58	-0.875128	0.227649	-3.8442	0.000120946	0.000767753
AT2G01670	3841.81	-0.990331	0.385203	-2.57093	0.0101425	0.0287599
AT2G01710	1474.41	-0.41995	0.175016	-2.3995	0.0164176	0.0421672
AT2G01740	124.795	-1.44755	0.369771	-3.91472	9.05103e-05	0.000604345
AT2G01940	321.712	-0.465146	0.198726	-2.34064	0.0192507	0.0476266
AT2G02050	3479.45	0.40499	0.167527	2.41746	0.0156293	0.040595
AT2G02150	210.178	-1.22864	0.463363	-2.65157	0.00801188	0.0237275
AT2G02160	8708.17	-0.620896	0.166208	-3.73565	0.000187233	0.00110728
AT2G02180	4705.45	-1.19697	0.218792	-5.47082	4.47969e-08	9.14211e-07
AT2G02220	2550.04	-1.34938	0.21244	-6.3518	2.12817e-10	7.70423e-09
AT2G02390	5717.43	-0.864962	0.261787	-3.30407	0.000952925	0.00422127
AT2G02410	1111.26	-0.708568	0.224259	-3.15959	0.00157989	0.00636847
AT2G02630	99.1244	-2.05317	0.983761	-2.08706	0.0368823	0.0801521
AT2G02710	9663	-1.96689	0.288722	-6.81239	9.59918e-12	4.77054e-10
AT2G02740	1444.58	-0.597491	0.223805	-2.6697	0.00759189	0.0226659
AT2G02810	942.153	-0.832731	0.31527	-2.64133	0.00825812	0.0242731
AT2G02955	408.748	-1.9458	0.323185	-6.0207	1.7366e-09	5.11102e-08
AT2G02980	288.655	-1.04652	0.343228	-3.04906	0.00229558	0.00862441
AT2G03240	2431.94	-0.989992	0.223046	-4.43852	9.05809e-06	8.73508e-05
AT2G03340	2018.24	-1.0784	0.223202	-4.83151	1.35499e-06	1.73094e-05
AT2G03440	4487.22	-0.494292	0.246974	-2.00139	0.0453502	0.0946167
AT2G03760	8056.64	-2.48896	0.371404	-6.7015	2.06293e-11	9.46358e-10
AT2G03820	4766.45	-1.19826	0.139788	-8.57197	1.01727e-17	1.53689e-15
AT2G03890	10284.2	-0.545476	0.238524	-2.28688	0.0222028	0.0535847
AT2G04040	3757.27	-5.26963	0.391686	-13.4537	2.92789e-41	1.10586e-37
AT2G04050	8758.8	-4.74676	0.445384	-10.6577	1.60531e-26	1.13686e-23
AT2G04070	1006.93	-4.03343	0.963458	-4.18642	2.83394e-05	0.00022774
AT2G04230	1012.12	-1.06306	0.283777	-3.74612	0.00017959	0.00107102
AT2G04350	3950.25	0.323557	0.163412	1.98001	0.0477026	0.0985627
AT2G04360	2382.72	-0.621609	0.223953	-2.77562	0.00550961	0.0174628
AT2G04550	1840.61	-0.490822	0.129903	-3.77836	0.000157864	0.000966376
AT2G04690	3098.02	-0.473107	0.230648	-2.0512	0.0402471	0.0860127
AT2G04795	484.999	-1.13408	0.392016	-2.89293	0.0038166	0.0130731
AT2G05380	189607	-4.24255	0.441958	-9.59945	8.03717e-22	2.02376e-19
AT2G05510	18472.8	-2.26894	0.430378	-5.27196	1.34973e-07	2.39695e-06
AT2G05520	57032.7	-1.30599	0.337745	-3.8668	0.000110272	0.00071318
AT2G05830	3643.59	0.450687	0.114076	3.95077	7.79009e-05	0.000530466
AT2G05940	2379.88	-0.747537	0.294198	-2.54093	0.0110558	0.030825
AT2G06040	581.914	-0.757435	0.191892	-3.94719	7.90726e-05	0.000536832
AT2G06925	720.514	-1.60448	0.309472	-5.18456	2.1653e-07	3.56097e-06
AT2G07673	225.743	-9.6709	1.66017	-5.82525	5.70256e-09	1.46521e-07
AT2G07675	572.764	-2.44397	0.966402	-2.52894	0.0114407	0.0316646
AT2G11520	1400.62	-0.7635	0.197861	-3.85877	0.000113958	0.000733669
AT2G11890	2602.03	-0.679549	0.248245	-2.73742	0.00619238	0.0192393
AT2G13290	633.801	-1.11046	0.217586	-5.10355	3.33339e-07	5.13188e-06
AT2G13610	916.136	-0.603186	0.269365	-2.23929	0.0251371	0.0591544
AT2G14080	1905.2	-1.07017	0.253691	-4.21842	2.46025e-05	0.00020157
AT2G14247	6999.35	-2.15449	0.335126	-6.4289	1.28532e-10	4.93692e-09
AT2G14740	2444.05	0.393775	0.117974	3.33781	0.000844412	0.00382568
AT2G15230	1497.23	-0.368038	0.125573	-2.93087	0.0033801	0.0118159
AT2G15300	399.902	0.492362	0.157683	3.12248	0.00179332	0.00706048
AT2G15390	1041.2	-1.06148	0.47647	-2.2278	0.0258938	0.0605579
AT2G15480	1793.36	-1.37574	0.330907	-4.15748	3.21782e-05	0.000253631
AT2G15490	2439.89	-1.54906	0.421478	-3.6753	0.000237569	0.00135
AT2G15630	75.8958	-1.25147	0.533466	-2.34593	0.0189797	0.0471413
AT2G15880	2196.56	-2.53647	0.464628	-5.45913	4.7847e-08	9.66408e-07
AT2G15890	10025.1	-3.03671	0.299578	-10.1366	3.79988e-24	1.4847e-21
AT2G15900	2053.48	-0.855949	0.170535	-5.01921	5.18849e-07	7.55666e-06
AT2G15960	6215.66	-3.62263	0.616413	-5.87696	4.1787e-09	1.10114e-07
AT2G16060	3786.71	-3.1154	0.711953	-4.37585	1.2096e-05	0.00011098
AT2G16365	2516.84	-1.46103	0.264773	-5.51805	3.42789e-08	7.24653e-07
AT2G16400	1774.02	-0.54731	0.15637	-3.50009	0.000465099	0.00232775
AT2G16500	7379.16	-0.448585	0.17923	-2.50284	0.0123202	0.0335981
AT2G16510	4705.84	-0.528982	0.200571	-2.63739	0.00835479	0.0245254
AT2G16600	19526.3	-0.530794	0.195463	-2.71557	0.00661609	0.0202833
AT2G16650	1092.87	-1.80354	0.199804	-9.02654	1.77177e-19	3.04181e-17
AT2G16660	2055.1	-1.17409	0.242079	-4.85001	1.23458e-06	1.58885e-05
AT2G16700	1511.57	-1.38837	0.327745	-4.23614	2.27393e-05	0.000189038
AT2G16950	4921.28	-0.339112	0.15078	-2.24905	0.0245094	0.0580269
AT2G17130	2894.84	0.477673	0.221014	2.16127	0.0306743	0.0692647
AT2G17240	3465.79	-0.616887	0.233874	-2.6377	0.00834715	0.0245093
AT2G17250	1031.84	-0.471156	0.205211	-2.29595	0.0216785	0.0525319
AT2G17380	1768.21	-0.281429	0.141906	-1.98321	0.0473441	0.0979114
AT2G17440	1971.02	-0.75723	0.138314	-5.47471	4.38236e-08	9.01206e-07
AT2G17520	2649.91	-0.394253	0.131172	-3.00563	0.00265036	0.00971568
AT2G17525	487.559	-0.753646	0.370699	-2.03304	0.0420486	0.0891065
AT2G17550	2310.19	-0.845619	0.28285	-2.98964	0.00279308	0.0101422
AT2G17820	2021.75	-0.535191	0.187563	-2.85339	0.0043255	0.014475
AT2G17850	39.2676	-3.2416	1.29033	-2.51222	0.0119974	0.0328841
AT2G17900	411.484	-0.585679	0.238574	-2.45492	0.0140917	0.0372935
AT2G18050	1590.46	-3.36627	0.401158	-8.39138	4.8045e-17	6.97946e-15
AT2G18090	3240.12	-0.746257	0.188661	-3.95554	7.63609e-05	0.000521547
AT2G18170	1052.94	-1.1741	0.232282	-5.05463	4.31233e-07	6.45482e-06
AT2G18193	4398.42	-2.70442	0.379004	-7.13561	9.63572e-13	5.92533e-11
AT2G18196	288.449	-0.620517	0.212185	-2.92441	0.00345107	0.0120172
AT2G18220	1247.73	-0.688958	0.235366	-2.92718	0.00342053	0.0119329
AT2G18280	7066.67	-0.904538	0.222305	-4.0689	4.72353e-05	0.00034868
AT2G18290	1243.94	-1.12263	0.209732	-5.3527	8.66499e-08	1.6557e-06
AT2G18350	156.456	-0.825154	0.352402	-2.34151	0.0192059	0.0475519
AT2G18450	612.658	-2.2778	0.945216	-2.40982	0.0159604	0.0412705
AT2G18690	2250.09	-2.67283	0.594342	-4.49712	6.88798e-06	6.97477e-05
AT2G18700	17531.5	-1.0014	0.295266	-3.39151	0.000695093	0.00324922
AT2G18730	2905.18	0.306121	0.1259	2.43146	0.015038	0.0392814
AT2G18900	1073.04	-1.08155	0.21637	-4.9986	5.77492e-07	8.23089e-06
AT2G18910	1036.31	-0.354709	0.106345	-3.33546	0.000851586	0.0038551
AT2G18950	1447.36	-1.32238	0.385693	-3.42858	0.000606746	0.00290699
AT2G18969	224.149	-2.7612	0.82559	-3.34452	0.000824239	0.00374627
AT2G19120	276.096	-0.831252	0.2803	-2.96558	0.00302115	0.0108126
AT2G19180	1863.17	-0.549228	0.218085	-2.51842	0.0117884	0.0324603
AT2G19190	283.028	-4.14595	0.805515	-5.14696	2.64747e-07	4.20736e-06
AT2G19450	1133.78	-1.0408	0.174409	-5.96755	2.40838e-09	6.80428e-08
AT2G19470	1821.69	-0.350774	0.17318	-2.02549	0.0428172	0.0903299
AT2G19800	35212.9	-4.88247	0.453048	-10.7769	4.42457e-27	3.34232e-24
AT2G19810	1019.46	-0.582388	0.289291	-2.01316	0.0440982	0.0925498
AT2G19860	1715.48	0.42091	0.151941	2.77022	0.00560186	0.0176958
AT2G20142	567.051	-2.26841	0.616473	-3.67966	0.000233545	0.00133181
AT2G20150	4.95384	-3.49315	1.71749	-2.03388	0.0419641	0.0889442
AT2G20400	411.814	-0.474692	0.205533	-2.30956	0.0209125	0.0509809
AT2G20800	554.383	-3.61419	0.52167	-6.92811	4.26501e-12	2.26887e-10
AT2G20850	1560.47	-1.00335	0.14199	-7.06633	1.59082e-12	9.38835e-11
AT2G21120	2882.2	-0.547939	0.165629	-3.30824	0.00093885	0.00417181
AT2G21130	348.266	-1.62743	0.402225	-4.04607	5.20838e-05	0.000378795
AT2G21160	6407.55	0.381098	0.122442	3.11246	0.00185532	0.00726673
AT2G21190	2067.6	-0.446824	0.199392	-2.24094	0.0250301	0.0589638
AT2G21210	1246.93	-1.02894	0.454909	-2.26185	0.0237064	0.0565749
AT2G21430	90.7323	-0.949374	0.36425	-2.60638	0.00915053	0.0264569
AT2G21500	965.551	-1.10237	0.226225	-4.87292	1.09963e-06	1.44046e-05
AT2G21520	6410.11	-0.384179	0.121433	-3.1637	0.00155778	0.00630227
AT2G21560	418.821	0.497863	0.231001	2.15524	0.031143	0.0701127
AT2G21640	3124.46	-2.72264	0.384098	-7.08839	1.35681e-12	8.13441e-11
AT2G21660	6873.16	-0.900542	0.240015	-3.75202	0.000175415	0.00105054
AT2G21900	45.6067	-4.33831	1.05689	-4.1048	4.04666e-05	0.000306298
AT2G22122	194.209	-0.939591	0.476419	-1.97219	0.0485875	0.0999891
AT2G22140	90.5969	-0.673959	0.321116	-2.09881	0.035834	0.0783398
AT2G22250	1285.61	0.49664	0.216988	2.28879	0.0220915	0.0534071
AT2G22270	659.159	-0.52488	0.1982	-2.64823	0.00809154	0.0239012
AT2G22300	5386.24	-0.729201	0.195091	-3.73775	0.000185672	0.00109977
AT2G22360	2388.73	-0.962151	0.242007	-3.97572	7.0167e-05	0.000485683
AT2G22450	770.792	-2.1939	0.326476	-6.71995	1.81787e-11	8.40749e-10
AT2G22490	1700.62	-0.745416	0.236533	-3.15143	0.00162476	0.00651917
AT2G22860	174.301	-3.40381	0.508234	-6.69733	2.12264e-11	9.69822e-10
AT2G22980	4423.18	-3.13802	0.474776	-6.60947	3.85709e-11	1.63954e-09
AT2G22990	28872.9	-1.48278	0.354022	-4.18837	2.80963e-05	0.000226268
AT2G23030	755.146	-1.33473	0.232369	-5.74401	9.24581e-09	2.28743e-07
AT2G23080	1221.71	-0.435482	0.204717	-2.12724	0.0334	0.0742069
AT2G23100	1026.19	-2.06315	0.342309	-6.02717	1.66855e-09	4.92353e-08
AT2G23270	46.4329	-3.17067	1.26167	-2.51307	0.0119685	0.0328206
AT2G23310	1894.63	-0.669423	0.136148	-4.91688	8.79336e-07	1.18616e-05
AT2G23320	3988.42	-0.770564	0.342974	-2.24671	0.0246582	0.0583304
AT2G23680	478.945	-1.8321	0.464129	-3.94741	7.90028e-05	0.000536679
AT2G23790	2298.56	0.314891	0.129896	2.42419	0.0153427	0.0399742
AT2G23810	11247.7	-1.14828	0.38766	-2.96209	0.0030556	0.0109068
AT2G23840	1226.83	-1.0182	0.34466	-2.95421	0.00313467	0.011131
AT2G23890	1057.07	-1.09659	0.218232	-5.02488	5.03743e-07	7.36504e-06
AT2G23980	3108.49	-0.448774	0.146924	-3.05447	0.00225459	0.00852127
AT2G24050	2127.59	-0.52736	0.176066	-2.99524	0.00274232	0.00999573
AT2G24070	610.013	-1.61631	0.734766	-2.19977	0.0278235	0.0640268
AT2G24100	2405.73	-1.3249	0.281279	-4.71026	2.474e-06	2.88107e-05
AT2G24120	4134.81	-1.948	0.299224	-6.51019	7.50573e-11	2.99463e-09
AT2G24180	5530.01	-1.13329	0.36691	-3.08874	0.00201009	0.00775985
AT2G24240	847.91	-0.864131	0.351241	-2.46022	0.013885	0.0368976
AT2G24420	4601.3	0.332408	0.138798	2.3949	0.0166248	0.0425569
AT2G24500	2705.62	-0.630446	0.167657	-3.76034	0.000169683	0.00102383
AT2G24940	3486.89	0.321495	0.111899	2.87307	0.00406506	0.0137784
AT2G25000	1028.67	-1.73787	0.437592	-3.97145	7.14373e-05	0.00049327
AT2G25070	4133.21	-0.735931	0.180876	-4.0687	4.72767e-05	0.000348758
AT2G25080	38711.6	-1.48314	0.364476	-4.06923	4.71692e-05	0.000348419
AT2G25090	1076.72	-1.14217	0.483101	-2.36424	0.0180671	0.0454728
AT2G25140	3507.05	-1.06049	0.488536	-2.17076	0.0299494	0.06798
AT2G25355	331.027	-0.575783	0.23502	-2.44994	0.0142882	0.037686
AT2G25440	30.4701	-2.22325	0.990164	-2.24533	0.0247467	0.0584787
AT2G25450	41381.7	-2.43624	0.345923	-7.04271	1.88543e-12	1.09558e-10
AT2G25460	501.889	-1.23893	0.557516	-2.22223	0.0262675	0.0612171
AT2G25580	457.592	-0.945506	0.297877	-3.17415	0.00150274	0.006121
AT2G25590	751.612	-0.683452	0.337537	-2.02482	0.0428859	0.0904411
AT2G25620	729.483	0.291864	0.134442	2.17094	0.0299359	0.0679631
AT2G25730	3961.29	-1.35554	0.265642	-5.10286	3.3456e-07	5.14369e-06
AT2G25735	1170.32	-1.81366	0.511848	-3.54337	0.000395055	0.00204027
AT2G25740	1070.16	-0.481702	0.170014	-2.8333	0.00460703	0.0151839
AT2G25770	477.291	-5.05195	0.716787	-7.04805	1.81444e-12	1.05976e-10
AT2G25930	2372.38	-1.08323	0.182522	-5.9348	2.94198e-09	8.11085e-08
AT2G26110	1605.25	0.460867	0.189715	2.42926	0.0151296	0.0394918
AT2G26280	6710.03	-0.811175	0.186851	-4.34128	1.41654e-05	0.000126784
AT2G26300	4216.92	-0.971334	0.20296	-4.78584	1.7027e-06	2.09207e-05
AT2G26440	811.659	-2.81458	0.416897	-6.75126	1.46566e-11	7.00734e-10
AT2G26510	2530.62	-0.399816	0.0895313	-4.46566	7.98212e-06	7.88539e-05
AT2G26560	5806.74	-4.04984	0.522631	-7.74895	9.26547e-15	8.2667e-13
AT2G26670	8873.67	-0.497595	0.19854	-2.50627	0.0122012	0.0333458
AT2G26980	13814.9	-1.64142	0.278072	-5.90286	3.57259e-09	9.63833e-08
AT2G26990	3199.47	-0.370618	0.148494	-2.49584	0.0125659	0.0341041
AT2G27080	2550.55	-2.04724	0.571449	-3.58253	0.000340279	0.00180764
AT2G27150	2171.14	-1.28174	0.226176	-5.66701	1.45309e-08	3.40888e-07
AT2G27200	572.638	-0.972412	0.195536	-4.97307	6.59015e-07	9.19619e-06
AT2G27500	3592.96	-1.22899	0.304464	-4.03656	5.42403e-05	0.000390965
AT2G27535	26.8828	-3.59128	0.965315	-3.72032	0.000198974	0.00116195
AT2G27600	7455.7	-0.243208	0.120015	-2.02648	0.0427155	0.0901995
AT2G27610	76.1612	-0.995198	0.454128	-2.19145	0.0284193	0.0650543
AT2G27650	122.434	-6.17548	1.30292	-4.73972	2.14009e-06	2.54263e-05
AT2G27660	452.527	-0.981543	0.403264	-2.434	0.014933	0.0390579
AT2G28110	2306.69	-1.26335	0.375029	-3.36867	0.000755313	0.00348755
AT2G28120	1989.23	-1.51935	0.52916	-2.87125	0.00408857	0.0138415
AT2G28190	1754.67	-1.30586	0.255385	-5.11329	3.16602e-07	4.92778e-06
AT2G28360	1358.62	-0.866965	0.17653	-4.91113	9.05521e-07	1.21906e-05
AT2G28510	580.881	-0.706414	0.344766	-2.04897	0.0404653	0.0864302
AT2G28540	2159.89	-0.569697	0.158228	-3.60049	0.000317618	0.00171378
AT2G28570	878.714	-1.52914	0.324935	-4.70599	2.52638e-06	2.93604e-05
AT2G28720	1814.01	-1.43207	0.336993	-4.24955	2.14201e-05	0.000179653
AT2G28815	679.66	-3.9159	0.382067	-10.2492	1.19277e-24	5.89956e-22
AT2G28840	6194.06	-1.2321	0.154286	-7.98582	1.39586e-15	1.48793e-13
AT2G28890	1770.51	-0.636488	0.211034	-3.01604	0.00256096	0.00944912
AT2G28910	20045	-1.046	0.256371	-4.08002	4.50309e-05	0.000335026
AT2G29110	50.6749	-2.86099	0.749794	-3.8157	0.000135796	0.000851522
AT2G29120	1073.79	-2.10038	0.328291	-6.39791	1.57523e-10	5.87136e-09
AT2G29140	3288.7	-0.886482	0.165751	-5.34829	8.87907e-08	1.6909e-06
AT2G29260	290.93	-2.29177	0.887107	-2.58342	0.00978273	0.0279074
AT2G29320	1156.26	-0.58717	0.178605	-3.28754	0.00101068	0.0044405
AT2G29340	10999	-0.978205	0.40787	-2.39833	0.0164701	0.0422567
AT2G29400	5743.04	-0.824522	0.178835	-4.61053	4.01646e-06	4.35753e-05
AT2G29420	3463.79	-1.0294	0.260918	-3.94532	7.96935e-05	0.00053958
AT2G29460	1168.37	-1.96526	0.718369	-2.73573	0.0062243	0.0193173
AT2G29490	1893.23	-0.960747	0.313797	-3.06168	0.00220095	0.00835758
AT2G29670	7943.68	-1.33181	0.307045	-4.33752	1.44101e-05	0.000128545
AT2G29680	685.467	-2.82925	0.700421	-4.03936	5.35977e-05	0.000387566
AT2G29720	499.073	-1.82125	0.423423	-4.30124	1.69842e-05	0.000148517
AT2G29740	892.5	-1.61839	0.279561	-5.78905	7.07876e-09	1.7864e-07
AT2G29940	362.264	-0.467295	0.219444	-2.12945	0.0332167	0.0739157
AT2G30140	3793.73	-2.14694	0.403615	-5.31927	1.04183e-07	1.92576e-06
AT2G30360	1516.9	0.437676	0.148781	2.94174	0.00326377	0.0115065
AT2G30400	58.5776	-1.14953	0.579584	-1.98336	0.047327	0.0978938
AT2G30410	1627.12	0.469787	0.182864	2.56905	0.0101979	0.0288665
AT2G30440	8421.51	-0.567923	0.153302	-3.70461	0.000211717	0.0012257
AT2G30580	722.704	-0.735164	0.239036	-3.07554	0.00210121	0.00804625
AT2G30600	21130.3	-3.24064	0.328465	-9.86599	5.84528e-23	1.8398e-20
AT2G30740	2771.75	-0.369847	0.158433	-2.33441	0.0195744	0.0482693
AT2G30750	2081.87	-2.25642	0.762866	-2.95782	0.0030982	0.0110448
AT2G30766	5892.82	-1.60122	0.406891	-3.93525	8.31098e-05	0.00055988
AT2G30780	871.984	-1.08219	0.252057	-4.29343	1.75934e-05	0.000152409
AT2G30990	2606.56	-1.25853	0.244921	-5.13851	2.76918e-07	4.37014e-06
AT2G31280	1475.2	-0.631309	0.233131	-2.70796	0.00676981	0.0206767
AT2G31360	5440.54	-1.35369	0.1301	-10.4049	2.35393e-25	1.27011e-22
AT2G31380	1754.7	-0.804487	0.272249	-2.95497	0.00312698	0.0111141
AT2G31510	3864.73	-0.298507	0.0862532	-3.46082	0.000538526	0.00263815
AT2G31610	11528.6	0.300999	0.0979297	3.07363	0.00211474	0.00808984
AT2G31730	872.437	-1.54429	0.233053	-6.62635	3.44099e-11	1.49386e-09
AT2G31800	5414.97	-1.52719	0.219918	-6.94439	3.80112e-12	2.06079e-10
AT2G31810	12186	-1.25419	0.30829	-4.06823	4.73714e-05	0.000349229
AT2G31865	719.125	-1.1131	0.422604	-2.63391	0.00844069	0.0247263
AT2G31890	3167.3	-0.739192	0.266473	-2.77398	0.00553753	0.0175365
AT2G32020	1157.68	-2.75043	0.545321	-5.0437	4.56623e-07	6.75457e-06
AT2G32150	8987.39	-1.19392	0.261242	-4.57017	4.87336e-06	5.15112e-05
AT2G32180	1587.7	-0.506407	0.252945	-2.00205	0.0452799	0.0945047
AT2G32190	549.268	-2.18823	0.67343	-3.24939	0.00115655	0.00493963
AT2G32320	1222.04	-0.788364	0.390442	-2.01916	0.043471	0.0913873
AT2G32390	376.773	-1.41009	0.329276	-4.2824	1.84892e-05	0.000159196
AT2G32520	3431.13	-0.277744	0.13569	-2.0469	0.0406677	0.0867481
AT2G32530	2206.73	-1.81226	0.474662	-3.81801	0.000134531	0.000844062
AT2G32550	241.215	-2.91685	0.478149	-6.10029	1.05875e-09	3.24235e-08
AT2G32600	1320.38	-0.554614	0.219845	-2.52275	0.0116441	0.0321646
AT2G32650	1953.08	-0.781537	0.271632	-2.87719	0.00401232	0.0136241
AT2G32660	235.435	-2.85253	0.514575	-5.54347	2.96539e-08	6.41238e-07
AT2G32850	2564.25	-0.508839	0.182831	-2.78312	0.00538394	0.017146
AT2G33150	28068.4	-1.25894	0.334715	-3.76124	0.000169073	0.0010212
AT2G33180	1342.16	-0.535323	0.239561	-2.2346	0.0254437	0.0597582
AT2G33250	2309.18	-0.912251	0.308784	-2.95433	0.00313348	0.011131
AT2G33340	8862.64	-1.03977	0.214391	-4.84988	1.23535e-06	1.58885e-05
AT2G33390	1259.25	-0.870504	0.281162	-3.0961	0.00196084	0.00759342
AT2G33710	391.082	-1.40954	0.38161	-3.69367	0.000221043	0.00127139
AT2G33830	9055.38	-3.57369	0.532439	-6.71193	1.92073e-11	8.84707e-10
AT2G33990	1181.71	0.310955	0.148493	2.09407	0.0362535	0.0790129
AT2G34000	15.4757	-1.90233	0.76514	-2.48625	0.0129097	0.0348202
AT2G34070	3429.38	-1.72083	0.305987	-5.62386	1.86733e-08	4.29184e-07
AT2G34080	206.295	-1.1352	0.402235	-2.82223	0.00476904	0.0156089
AT2G34090	502.691	-0.939442	0.21352	-4.39979	1.08358e-05	0.000101051
AT2G34220	18.7546	-1.24564	0.589189	-2.11416	0.0345017	0.0760286
AT2G34360	31.3167	-1.87467	0.836631	-2.24074	0.0250428	0.0589816
AT2G34730	1559.06	-0.760239	0.263321	-2.88712	0.00388783	0.013269
AT2G35050	11802.7	-0.680773	0.209354	-3.25178	0.00114686	0.00491236
AT2G35290	234.051	-2.19529	0.388291	-5.65374	1.56991e-08	3.65271e-07
AT2G35510	2223.63	-0.463513	0.195678	-2.36875	0.0178483	0.0450422
AT2G35540	380.031	-0.555262	0.199896	-2.77775	0.0054737	0.0173732
AT2G35690	1656.95	-0.39668	0.183807	-2.15814	0.0309172	0.0697021
AT2G35850	534.128	-2.27152	0.839682	-2.70521	0.00682612	0.0208089
AT2G35920	2620.38	-0.574311	0.165108	-3.47839	0.000504435	0.00249053
AT2G35980	483.474	-1.35564	0.630177	-2.15121	0.0314599	0.0707426
AT2G36026	320.474	-1.83167	0.698534	-2.62216	0.00873745	0.0254771
AT2G36080	1082.02	-1.47086	0.280577	-5.24227	1.5861e-07	2.72718e-06
AT2G36220	1653.4	-2.30621	0.39648	-5.8167	6.00196e-09	1.53517e-07
AT2G36270	68.4246	-2.33097	0.471691	-4.94174	7.74292e-07	1.0596e-05
AT2G36320	4169.84	-1.15174	0.219796	-5.24002	1.60558e-07	2.75649e-06
AT2G36340	408.991	-1.00805	0.250718	-4.02066	5.80352e-05	0.000414365
AT2G36370	494.059	-0.484505	0.229328	-2.11272	0.0346251	0.076182
AT2G36460	18283.6	-1.0753	0.362009	-2.97036	0.00297446	0.0106691
AT2G36470	239.471	-0.652737	0.317844	-2.05364	0.0400108	0.0856366
AT2G36540	216.795	-3.25185	0.47199	-6.88966	5.59255e-12	2.93376e-10
AT2G36590	543.526	-1.80175	0.821572	-2.19305	0.0283037	0.064883
AT2G36630	1820.01	-1.0046	0.292591	-3.43346	0.000595935	0.00285882
AT2G36690	121.657	-1.69976	0.814076	-2.08796	0.0368011	0.0800347
AT2G36800	7087.27	-3.50463	0.55551	-6.30885	2.81113e-10	9.83116e-09
AT2G36900	1833.46	-0.445085	0.20691	-2.1511	0.0314682	0.0707473
AT2G36910	5681.49	0.365721	0.17102	2.13847	0.0324788	0.0725873
AT2G36950	4407.05	-1.01161	0.432472	-2.33914	0.019328	0.0477761
AT2G37025	1100.06	-1.4042	0.34001	-4.12989	3.6293e-05	0.000280516
AT2G37060	1018.92	-1.29971	0.332599	-3.90774	9.31636e-05	0.000619869
AT2G37200	1155.56	-0.675447	0.303838	-2.22305	0.0262124	0.0611388
AT2G37410	6953.8	-0.855553	0.255347	-3.35055	0.000806511	0.00368491
AT2G37430	95.5478	-2.02721	0.788877	-2.56974	0.0101775	0.0288232
AT2G37520	2043.8	-0.828825	0.204187	-4.05914	4.92533e-05	0.000360989
AT2G37540	2457.17	-1.2533	0.351319	-3.56741	0.00036053	0.00189479
AT2G37680	729.129	-0.511879	0.188308	-2.71831	0.00656161	0.0201544
AT2G37760	4162.77	-1.85678	0.378709	-4.90292	9.44231e-07	1.26168e-05
AT2G37770	1462.27	-3.14386	0.527936	-5.95499	2.60081e-09	7.27649e-08
AT2G37990	2111.21	-0.515615	0.209121	-2.46563	0.0136773	0.0364825
AT2G38180	507.808	-0.580284	0.271175	-2.13989	0.0323635	0.0723639
AT2G38185	624.297	-0.421732	0.138393	-3.04735	0.00230869	0.00866216
AT2G38210	782.298	-1.85444	0.791728	-2.34228	0.0191666	0.047514
AT2G38240	802.627	-6.03541	0.940627	-6.41636	1.39567e-10	5.28906e-09
AT2G38250	692.042	-2.59959	0.610724	-4.25658	2.07581e-05	0.000174747
AT2G38290	1597.45	-0.679363	0.316926	-2.1436	0.0320651	0.0718044
AT2G38340	217.765	-2.81067	0.59769	-4.70256	2.56925e-06	2.97366e-05
AT2G38400	2673.04	-1.07225	0.23495	-4.56373	5.02528e-06	5.28214e-05
AT2G38460	460.818	-0.827989	0.266782	-3.10361	0.00191173	0.00745418
AT2G38465	75.7567	-1.22619	0.462467	-2.65142	0.00801532	0.0237275
AT2G38470	7231.05	-1.88183	0.564606	-3.33299	0.00085918	0.00388483
AT2G38530	3856.65	-1.93535	0.643903	-3.00566	0.00265006	0.00971568
AT2G38610	2245.65	-0.639899	0.275516	-2.32254	0.0202037	0.0495622
AT2G38620	746.853	-2.48189	0.930888	-2.66616	0.00767238	0.0228718
AT2G38820	2114.7	-0.831869	0.276494	-3.00863	0.00262429	0.00964196
AT2G38823	533.319	-1.08013	0.525113	-2.05696	0.0396904	0.0850316
AT2G38870	3301.52	-1.48161	0.508724	-2.91241	0.00358657	0.0124052
AT2G38960	1108.88	-0.328344	0.157621	-2.08313	0.0372395	0.0807581
AT2G39190	7283.07	-0.484524	0.236031	-2.05279	0.0400927	0.0857638
AT2G39200	738.987	-1.70912	0.523449	-3.26511	0.00109422	0.00472508
AT2G39210	1717.45	-1.714	0.482324	-3.55362	0.000379963	0.0019813
AT2G39230	105.49	-1.36718	0.536808	-2.54687	0.0108695	0.0304254
AT2G39400	2926.73	-1.79745	0.248327	-7.23822	4.54595e-13	2.96035e-11
AT2G39518	418.471	-2.19233	0.390546	-5.61351	1.98266e-08	4.52771e-07
AT2G39570	18850.1	-2.08516	0.33119	-6.29598	3.0546e-10	1.06498e-08
AT2G39705	340.78	-0.837908	0.333111	-2.5154	0.0118896	0.0326756
AT2G39710	889.748	-2.31303	0.481026	-4.80853	1.52043e-06	1.90575e-05
AT2G39810	2227.22	-0.552467	0.164856	-3.3512	0.000804611	0.00367771
AT2G39840	1132.85	-0.701399	0.207567	-3.37915	0.000727095	0.00336979
AT2G39960	2930.15	0.198378	0.100409	1.97569	0.0481896	0.0994058
AT2G39970	4051.32	-0.555108	0.199434	-2.78342	0.00537893	0.0171397
AT2G40000	16833.7	-1.2154	0.435429	-2.79126	0.00525029	0.0168196
AT2G40080	75.3037	-1.18369	0.481985	-2.45588	0.0140542	0.0372161
AT2G40140	3636.7	-1.32557	0.377578	-3.51073	0.000446881	0.00225852
AT2G40330	449.573	-2.55069	0.31559	-8.08229	6.35606e-16	7.13075e-14
AT2G40340	575.696	-4.70647	0.927558	-5.07404	3.89458e-07	5.8761e-06
AT2G40400	8357.55	-0.910295	0.259001	-3.51464	0.000440351	0.0022321
AT2G40420	2201.95	-1.55124	0.294762	-5.26267	1.41974e-07	2.49027e-06
AT2G40570	531.545	-0.713583	0.297145	-2.40146	0.0163298	0.0419861
AT2G40620	1099.57	0.420484	0.186041	2.26017	0.0238106	0.05676
AT2G40810	467.428	-0.722145	0.199184	-3.62551	0.000288388	0.0015832
AT2G40935	584.867	-1.20724	0.282049	-4.28025	1.86682e-05	0.000159886
AT2G40950	1382.81	-0.675887	0.17517	-3.85846	0.000114101	0.000733813
AT2G41010	931.572	-0.922655	0.433277	-2.12948	0.0332146	0.0739157
AT2G41040	1543.39	-0.808726	0.354395	-2.28199	0.02249	0.054082
AT2G41110	3650.93	0.411074	0.0900441	4.56525	4.9891e-06	5.24897e-05
AT2G41210	1078.17	-1.92435	0.264854	-7.26571	3.71095e-13	2.43056e-11
AT2G41240	10944.2	-1.43028	0.585595	-2.44244	0.0145882	0.0383257
AT2G41370	354.314	-0.385403	0.177889	-2.16653	0.0302706	0.0685516
AT2G41420	4629.63	-0.481167	0.205443	-2.34209	0.0191759	0.047514
AT2G41500	1238.62	-0.453234	0.202753	-2.2354	0.0253913	0.0596658
AT2G41530	5675.93	-0.280516	0.117828	-2.38073	0.0172784	0.0439366
AT2G41560	17014.8	-0.823896	0.232078	-3.55008	0.000385117	0.00200173
AT2G41700	3856.65	-1.17535	0.191022	-6.15295	7.60568e-10	2.45066e-08
AT2G41705	1462.17	-1.18518	0.212675	-5.57273	2.50773e-08	5.51749e-07
AT2G41730	2115.64	-2.60219	0.560637	-4.64148	3.45918e-06	3.86168e-05
AT2G41810	88.6454	-1.27163	0.604274	-2.10439	0.0353445	0.0775088
AT2G41945	867.141	-0.674921	0.213334	-3.16367	0.00155791	0.00630227
AT2G42065	169.054	-4.33108	0.449193	-9.64191	5.31881e-22	1.36971e-19
AT2G42160	1541.43	-0.424819	0.185734	-2.28724	0.0221818	0.0535569
AT2G42170	866.621	-2.40573	0.450894	-5.33546	9.53031e-08	1.78788e-06
AT2G42280	1675.51	-2.38596	0.327828	-7.27809	3.38576e-13	2.23047e-11
AT2G42340	13.2168	-1.51221	0.759446	-1.99121	0.0464583	0.0964491
AT2G42360	236.571	-0.917213	0.461604	-1.98701	0.0469209	0.0972134
AT2G42490	8864.2	-0.715915	0.193796	-3.69417	0.000220609	0.00126954
AT2G42710	1292.08	-0.735371	0.168765	-4.35737	1.31637e-05	0.000119231
AT2G42810	3860.26	-0.472933	0.101751	-4.64794	3.3527e-06	3.76133e-05
AT2G42890	3463.57	-0.498419	0.122568	-4.06646	4.77332e-05	0.000351668
AT2G43140	327.401	-3.00816	0.537953	-5.59186	2.24648e-08	4.98138e-07
AT2G43400	3550.42	-1.62242	0.289082	-5.61231	1.99646e-08	4.54255e-07
AT2G43420	1479.93	-0.377307	0.177183	-2.12948	0.0332147	0.0739157
AT2G43445	210.765	-1.3897	0.252816	-5.4969	3.86528e-08	8.03623e-07
AT2G43510	3849.14	-2.78795	0.603006	-4.62341	3.77474e-06	4.16789e-05
AT2G43620	639.016	-3.16926	0.64277	-4.93063	8.19633e-07	1.1176e-05
AT2G43790	3317.06	-0.324622	0.121267	-2.67692	0.00743018	0.0222906
AT2G43820	10932.1	-1.60134	0.329403	-4.86134	1.16595e-06	1.51334e-05
AT2G43840	810.237	-2.73671	0.982483	-2.7855	0.0053445	0.0170587
AT2G43910	13239	-0.613221	0.151364	-4.0513	5.09348e-05	0.000371592
AT2G43970	34012	-0.645064	0.173291	-3.72243	0.000197314	0.00115424
AT2G44080	990.321	-1.37481	0.467407	-2.94137	0.00326769	0.0115131
AT2G44160	8983.49	0.334872	0.130125	2.57347	0.0100685	0.0286218
AT2G44180	1755.19	-0.423949	0.203413	-2.08418	0.0371435	0.0806117
AT2G44340	346.449	-2.07774	0.917786	-2.26386	0.023583	0.0563389
AT2G44370	341.232	-1.07861	0.490574	-2.19867	0.0279013	0.0641407
AT2G44380	414.427	-0.707394	0.335797	-2.10661	0.0351513	0.0771152
AT2G44410	2241.53	-0.49992	0.114719	-4.35778	1.31389e-05	0.000119101
AT2G44460	3884.11	-4.41864	0.878128	-5.03188	4.85685e-07	7.12862e-06
AT2G44510	356.02	-1.12578	0.411816	-2.73369	0.00626295	0.0194043
AT2G44525	1331.82	-0.256368	0.128655	-1.99267	0.0462975	0.0961785
AT2G44760	2790.43	-0.67226	0.240073	-2.80023	0.00510663	0.0164665
AT2G44770	1517.83	0.298723	0.132207	2.25951	0.0238514	0.0568251
AT2G44790	2540.34	-0.468962	0.197447	-2.37513	0.0175429	0.0444795
AT2G44980	900.739	-0.714105	0.243211	-2.93616	0.00332307	0.0116539
AT2G45080	73.3071	-1.05069	0.488787	-2.14959	0.0315875	0.070917
AT2G45160	3191.37	-0.637877	0.257045	-2.48158	0.0130802	0.0351796
AT2G45170	8494.83	-1.27236	0.27768	-4.58211	4.6031e-06	4.91128e-05
AT2G45250	1539.95	-0.592636	0.23696	-2.501	0.0123844	0.0337325
AT2G45380	3442.34	-0.797508	0.216514	-3.6834	0.000230146	0.00131507
AT2G45560	842.022	-1.06699	0.189811	-5.62131	1.89511e-08	4.34685e-07
AT2G45660	2801.21	-1.55871	0.337417	-4.61954	3.84582e-06	4.22668e-05
AT2G45830	656.511	-0.442746	0.199404	-2.22035	0.0263951	0.061426
AT2G45920	1420.94	-0.759503	0.225002	-3.37553	0.000736728	0.00340729
AT2G45950	1282.97	-0.698956	0.205492	-3.40137	0.000670485	0.00314978
AT2G46220	18016.8	-0.693909	0.331599	-2.09262	0.0363834	0.0792503
AT2G46310	314.33	-0.5573	0.17738	-3.14185	0.00167885	0.00669826
AT2G46400	246.092	-1.46572	0.690728	-2.12199	0.0338387	0.0749183
AT2G46750	1713.01	-0.358028	0.143695	-2.49158	0.0127177	0.0344007
AT2G46790	1014.03	-0.93711	0.415393	-2.25596	0.0240732	0.0572348
AT2G46900	2896.05	-0.460499	0.16866	-2.73034	0.00632684	0.0195499
AT2G47000	12033.2	-1.20185	0.421085	-2.85419	0.00431473	0.0144603
AT2G47070	7416.18	0.436312	0.162627	2.6829	0.00729866	0.0219716
AT2G47210	2512.06	-0.399952	0.162591	-2.45987	0.0138986	0.0369224
AT2G47270	414.416	-1.26968	0.354052	-3.58614	0.000335611	0.00178703
AT2G47310	459.91	-0.432986	0.152272	-2.8435	0.00446207	0.0148356
AT2G47320	2831.37	0.494858	0.145715	3.39607	0.000683603	0.00320211
AT2G47390	9365.39	-0.722356	0.183472	-3.93714	8.24586e-05	0.000555823
AT2G47420	2124.79	-0.517876	0.186709	-2.77371	0.00554214	0.0175462
AT2G47520	397.123	-2.48108	0.640734	-3.87225	0.000107837	0.000699831
AT2G47550	286.495	-1.09606	0.465402	-2.35508	0.018519	0.0463629
AT2G47610	16678.5	0.367692	0.154078	2.38641	0.0170138	0.0433807
AT2G47890	1172.98	-0.857854	0.243469	-3.52346	0.000425952	0.0021692
AT2G47990	814.043	-0.96499	0.19713	-4.89521	9.82017e-07	1.30755e-05
AT2G48020	7688.18	-0.703697	0.273751	-2.57057	0.010153	0.0287826
AT2G48060	3357.38	-0.571446	0.257754	-2.21702	0.0266216	0.0618767
AT2G48160	5198.13	-0.421159	0.190045	-2.21611	0.0266843	0.061997
AT3G01040	1645.6	-0.873487	0.243192	-3.59175	0.000328463	0.00175889
AT3G01090	3405.18	-0.229267	0.103839	-2.20791	0.0272503	0.0629634
AT3G01170	1037.5	-0.566054	0.191679	-2.95313	0.00314571	0.0111597
AT3G01175	111.05	-1.66728	0.621514	-2.68262	0.00730486	0.0219844
AT3G01290	17697	-1.85047	0.455266	-4.06459	4.8116e-05	0.000354028
AT3G01310	4392.95	-1.33081	0.201357	-6.60923	3.86335e-11	1.63954e-09
AT3G01380	1080.66	-0.461312	0.202317	-2.28014	0.0225993	0.0543103
AT3G01390	6758.23	0.420271	0.209478	2.00627	0.0448271	0.0936978
AT3G01590	2164.22	-0.328345	0.146384	-2.24305	0.0248938	0.0587649
AT3G01600	829.352	-3.12331	0.463663	-6.73617	1.6262e-11	7.58293e-10
AT3G01640	1388.27	-0.390056	0.194942	-2.00088	0.0454056	0.0946799
AT3G01720	2423.42	0.461632	0.192827	2.39402	0.016665	0.0426256
AT3G01770	3748.42	-0.542659	0.161413	-3.36192	0.000774025	0.00355945
AT3G01850	1447.03	-0.608432	0.272838	-2.23001	0.0257464	0.0602919
AT3G01970	1650.96	-2.9959	0.407508	-7.35175	1.95636e-13	1.39418e-11
AT3G02060	2838.17	-1.24775	0.220495	-5.65885	1.52394e-08	3.56036e-07
AT3G02140	1420.36	-0.597278	0.234377	-2.54836	0.0108231	0.030303
AT3G02240	198.359	-2.02158	0.705256	-2.86645	0.00415105	0.0140321
AT3G02330	80.5008	-0.919329	0.344065	-2.67196	0.00754087	0.0225545
AT3G02350	3746.6	-0.310125	0.150051	-2.0668	0.0387529	0.0834332
AT3G02360	9675.81	0.365286	0.1637	2.23144	0.0256521	0.0601743
AT3G02400	590.843	-0.578533	0.247944	-2.33332	0.0196313	0.0483991
AT3G02450	3735.47	-1.15075	0.258335	-4.45448	8.40966e-06	8.21465e-05
AT3G02460	1807.94	-0.78043	0.18772	-4.15741	3.21879e-05	0.000253631
AT3G02470	116793	-0.490612	0.232217	-2.11274	0.0346233	0.076182
AT3G02580	2447.58	-0.346626	0.106852	-3.24398	0.00117872	0.00501649
AT3G02650	778.284	-0.636926	0.247525	-2.57318	0.0100769	0.028637
AT3G02740	2112.38	-0.356268	0.157633	-2.26012	0.0238141	0.05676
AT3G02780	6377.76	0.448175	0.125249	3.57827	0.000345873	0.00183135
AT3G02830	4970.21	0.336788	0.146963	2.29166	0.0219254	0.0530734
AT3G02840	120.931	-3.38057	0.857409	-3.94277	8.05443e-05	0.000544864
AT3G03020	458.772	-1.08877	0.378282	-2.8782	0.00399954	0.0135929
AT3G03040	1437.52	-0.515492	0.194574	-2.64934	0.00806483	0.023841
AT3G03060	708.486	-0.84238	0.321663	-2.61883	0.00882327	0.0256811
AT3G03270	1827.28	-1.03789	0.451461	-2.29896	0.0215074	0.0521842
AT3G03380	8507.87	-0.789434	0.218593	-3.61143	0.000304517	0.00165332
AT3G03420	865.317	-0.67202	0.215309	-3.12118	0.00180126	0.00708684
AT3G03490	966.945	-0.757703	0.264683	-2.86269	0.00420067	0.0141744
AT3G03630	2329.46	-1.00194	0.25818	-3.88079	0.000104119	0.000679677
AT3G03890	3568.83	-0.701216	0.276088	-2.53983	0.0110908	0.0308922
AT3G03970	488.344	-0.98452	0.214786	-4.58372	4.56771e-06	4.8781e-05
AT3G04010	705.068	-0.886744	0.337564	-2.62689	0.00861687	0.0251644
AT3G04060	566.105	-0.54697	0.272823	-2.00486	0.0449784	0.0939447
AT3G04070	1488.77	-2.25719	0.500348	-4.51125	6.44472e-06	6.59072e-05
AT3G04090	4456.87	-0.333565	0.166256	-2.00633	0.0448211	0.0936978
AT3G04110	810.196	-1.12085	0.449856	-2.49158	0.0127177	0.0344007
AT3G04220	177.287	-2.0943	0.625762	-3.34679	0.00081752	0.0037217
AT3G04240	6554.82	-0.366392	0.163128	-2.24604	0.0247016	0.0583964
AT3G04640	764.219	-1.30426	0.519964	-2.50837	0.012129	0.0331805
AT3G04760	2843.79	-1.37548	0.317365	-4.33406	1.46385e-05	0.0001304
AT3G04830	2593.89	0.383005	0.12334	3.10529	0.00190091	0.00742474
AT3G04940	2638.34	0.286402	0.128042	2.23677	0.025301	0.0595032
AT3G05040	1388.96	-0.533852	0.170141	-3.13771	0.00170271	0.00677915
AT3G05090	3654.48	-0.657466	0.158213	-4.15558	3.24459e-05	0.000254778
AT3G05130	775.871	-1.4273	0.177676	-8.03318	9.49816e-16	1.04489e-13
AT3G05155	117.578	-1.60056	0.657204	-2.43542	0.0148746	0.0389485
AT3G05230	882.775	0.358082	0.154584	2.31642	0.0205354	0.0501911
AT3G05390	130.092	-1.80012	0.736681	-2.44356	0.0145433	0.0382431
AT3G05400	1444.35	-1.4948	0.723891	-2.06495	0.0389279	0.0837781
AT3G05420	3381.88	0.434866	0.162494	2.6762	0.00744618	0.0223208
AT3G05750	903.253	-0.564376	0.179172	-3.14991	0.00163319	0.00654606
AT3G05770	30.813	-2.84988	1.1364	-2.50781	0.0121481	0.0332168
AT3G06080	8426.08	-0.684377	0.272638	-2.5102	0.0120663	0.0330408
AT3G06110	1173.1	-0.364499	0.17847	-2.04236	0.0411162	0.0874907
AT3G06200	1252.33	-0.523966	0.206348	-2.53923	0.0111098	0.0309343
AT3G06250	1072.07	-0.334284	0.165948	-2.01439	0.0439681	0.0923281
AT3G06270	1204.59	-0.676819	0.170349	-3.97314	7.09327e-05	0.000490085
AT3G06350	6253.52	-0.327277	0.114273	-2.864	0.00418326	0.0141199
AT3G06380	3567.43	-0.808177	0.235778	-3.42771	0.000608706	0.00291269
AT3G06430	2975.67	-0.437583	0.215762	-2.02808	0.0425519	0.0899543
AT3G06440	969.311	-0.400367	0.19223	-2.08275	0.0372744	0.0808159
AT3G06490	54.5485	-1.68801	0.723026	-2.33465	0.0195619	0.0482489
AT3G06500	4373.31	-1.24216	0.303336	-4.09501	4.22157e-05	0.000316996
AT3G06530	2889.69	-0.977976	0.331827	-2.94725	0.00320616	0.0113386
AT3G06620	2327.87	-0.777124	0.200016	-3.8853	0.000102203	0.000670174
AT3G06670	5046.53	-0.294661	0.130781	-2.25309	0.0242538	0.0575297
AT3G06720	5552.27	-0.46813	0.191744	-2.44143	0.0146291	0.0384153
AT3G06810	4963.93	-0.655989	0.219793	-2.98457	0.00283974	0.0102835
AT3G06850	5634.77	-2.32029	0.39628	-5.85519	4.76472e-09	1.23828e-07
AT3G07050	3246.54	-0.770559	0.159754	-4.8234	1.41129e-06	1.79074e-05
AT3G07140	1453.38	-0.332956	0.142833	-2.33108	0.019749	0.0486363
AT3G07360	4946.68	0.473783	0.195566	2.42263	0.0154086	0.0401092
AT3G07370	1516.88	-0.744407	0.281013	-2.64902	0.00807261	0.0238578
AT3G07560	8512.92	-0.707073	0.295079	-2.39622	0.0165653	0.0424664
AT3G07590	486.784	-0.467067	0.23509	-1.98676	0.0469494	0.0972332
AT3G07650	366.953	-1.68323	0.280954	-5.99112	2.08404e-09	5.96319e-08
AT3G07670	3109.57	-0.589238	0.25427	-2.31737	0.0204834	0.0500966
AT3G07700	10039.4	-1.29719	0.333957	-3.8843	0.000102623	0.000671868
AT3G07770	4789.08	-0.960636	0.303615	-3.16399	0.00155622	0.00630227
AT3G07800	950.92	-0.594984	0.238097	-2.49892	0.0124572	0.0338821
AT3G07980	1564.19	-0.469106	0.172481	-2.71976	0.006533	0.0200774
AT3G08730	5968.96	-0.312877	0.157918	-1.98126	0.0475625	0.098327
AT3G08740	10973.7	-0.77094	0.295431	-2.60954	0.0090664	0.0262404
AT3G08760	2187.84	-1.06754	0.310438	-3.43883	0.000584238	0.00281463
AT3G08800	217.949	-0.511727	0.23423	-2.18472	0.0289097	0.0660036
AT3G08943	2306.17	-0.360397	0.170979	-2.10784	0.0350446	0.0769256
AT3G08950	608.028	-0.899445	0.322046	-2.79291	0.00522369	0.0167534
AT3G09020	515.377	-1.10636	0.445026	-2.48605	0.012917	0.0348317
AT3G09150	1029.2	-0.68429	0.338187	-2.02341	0.0430312	0.0906799
AT3G09210	4470.97	-0.619811	0.247078	-2.50857	0.0121222	0.0331779
AT3G09250	1529.72	-0.645972	0.211001	-3.06146	0.00220261	0.00836107
AT3G09390	25179.9	-2.05165	0.412543	-4.97317	6.58664e-07	9.19619e-06
AT3G09405	252.907	-2.48379	0.764636	-3.24833	0.00116084	0.0049561
AT3G09650	1255.01	-1.1802	0.342727	-3.44356	0.000574103	0.00277406
AT3G09900	1817.73	-0.680526	0.184258	-3.69333	0.000221336	0.00127203
AT3G10020	8100.42	-1.06065	0.535457	-1.98083	0.0476098	0.098407
AT3G10050	4279.02	-0.875576	0.180521	-4.85026	1.23299e-06	1.58885e-05
AT3G10160	3440.24	-0.456251	0.174243	-2.61848	0.00883217	0.0257004
AT3G10300	1569.2	-1.59456	0.238523	-6.68516	2.30671e-11	1.04969e-09
AT3G10330	1156.62	0.342698	0.133924	2.55891	0.0105001	0.029552
AT3G10380	6092.43	-0.315475	0.123503	-2.55439	0.0106373	0.029864
AT3G10450	2029.27	-2.99784	0.552893	-5.4221	5.89044e-08	1.16891e-06
AT3G10480	1431.96	-0.41599	0.149016	-2.79158	0.00524508	0.0168077
AT3G10490	1764.26	-0.424169	0.150465	-2.81905	0.00481664	0.0157465
AT3G10500	2182.05	-0.70605	0.185622	-3.80369	0.000142555	0.000887294
AT3G10530	870.284	-1.19656	0.241259	-4.95965	7.0619e-07	9.72277e-06
AT3G10720	10249.1	-0.935229	0.259936	-3.59792	0.000320776	0.00172479
AT3G10740	7980.62	-0.621032	0.19029	-3.26361	0.00110002	0.0047429
AT3G10815	360.327	-3.01434	0.590525	-5.1045	3.31672e-07	5.11316e-06
AT3G10930	404.668	-2.70278	0.685071	-3.94525	7.97156e-05	0.00053958
AT3G10970	5978.55	-0.603737	0.274803	-2.19698	0.0280219	0.0643527
AT3G10980	1444.42	-0.678517	0.282413	-2.40257	0.0162804	0.0418782
AT3G11020	370.845	-1.99297	0.750859	-2.65425	0.00794852	0.02358
AT3G11220	559.232	-0.70204	0.192406	-3.64875	0.000263517	0.0014738
AT3G11250	1647.06	0.365063	0.171651	2.12678	0.0334387	0.0742203
AT3G11260	44.037	-1.34716	0.598494	-2.25091	0.024391	0.0577948
AT3G11280	2319.99	0.339295	0.144882	2.34188	0.0191871	0.0475212
AT3G11450	6176.75	-0.952757	0.204696	-4.65451	3.24752e-06	3.66145e-05
AT3G11510	14072.8	0.335467	0.0958969	3.49821	0.000468397	0.00233909
AT3G11540	2321.67	-0.347268	0.169766	-2.04557	0.0407984	0.0869942
AT3G11560	12481.7	-1.20209	0.281509	-4.27018	1.95317e-05	0.00016638
AT3G11580	280.293	-1.42309	0.624482	-2.27883	0.0226774	0.0544516
AT3G11590	1721.76	0.306804	0.152018	2.01821	0.0435698	0.0915597
AT3G11840	242.776	-1.33013	0.506292	-2.6272	0.00860897	0.0251478
AT3G11880	1380.74	-0.529664	0.149697	-3.53823	0.000402818	0.00207187
AT3G11964	3005.49	-0.616367	0.303612	-2.03011	0.0423451	0.0895506
AT3G12080	7704.35	-0.558532	0.256852	-2.17452	0.0296659	0.0674311
AT3G12090	465.772	0.456418	0.191452	2.38398	0.0171263	0.0436184
AT3G12130	1815.91	-0.459034	0.145703	-3.15047	0.00163009	0.00653827
AT3G12230	538.685	-6.902	1.21432	-5.68383	1.31711e-08	3.15521e-07
AT3G12270	984.889	-0.940483	0.230701	-4.07663	4.56926e-05	0.000339726
AT3G12340	507.346	-1.02247	0.328248	-3.11493	0.00183991	0.00721886
AT3G12590	2067.38	-0.490705	0.230495	-2.12892	0.0332609	0.0739703
AT3G12740	4720.69	-0.768455	0.214068	-3.58977	0.000330971	0.00176814
AT3G12750	385.086	-0.452829	0.216318	-2.09335	0.0363181	0.0791243
AT3G12830	320.259	-0.809613	0.293166	-2.76162	0.00575157	0.018078
AT3G13060	4561.01	-0.615062	0.195562	-3.14511	0.00166025	0.00663572
AT3G13062	7905.78	-1.09556	0.260491	-4.20575	2.60222e-05	0.000211671
AT3G13070	4031.8	-0.537119	0.195937	-2.74129	0.00611987	0.0190558
AT3G13080	11826.6	-1.99255	0.513657	-3.87914	0.000104824	0.000683016
AT3G13200	6003.87	-0.387489	0.171457	-2.25997	0.0238228	0.056769
AT3G13224	1670.08	-0.468072	0.138523	-3.37903	0.000727429	0.00336979
AT3G13225	1809.2	-0.673591	0.247872	-2.7175	0.00657778	0.0201986
AT3G13230	792.525	-0.970252	0.276923	-3.50369	0.000458853	0.00230362
AT3G13340	4150.97	-0.662441	0.161069	-4.11278	3.90915e-05	0.000298481
AT3G13450	5714.28	-2.62014	0.37816	-6.92867	4.24826e-12	2.26887e-10
AT3G13460	26498.1	-1.46479	0.199689	-7.33535	2.21138e-13	1.51862e-11
AT3G13740	3033.38	-1.86395	0.338116	-5.51277	3.53237e-08	7.43964e-07
AT3G13750	62270	-1.66421	0.294936	-5.64261	1.67494e-08	3.88909e-07
AT3G13790	6638.12	-2.21047	0.437907	-5.04781	4.46912e-07	6.64561e-06
AT3G13950	249.281	-3.66001	0.998427	-3.66577	0.000246593	0.00139289
AT3G14010	4471.74	-0.443315	0.169957	-2.6084	0.00909661	0.0263212
AT3G14020	394.818	-0.687217	0.303756	-2.2624	0.0236727	0.0565062
AT3G14050	10226.7	-1.96328	0.252713	-7.76882	7.92184e-15	7.2389e-13
AT3G14075	1244.82	-0.420417	0.177673	-2.36625	0.0179695	0.0452975
AT3G14080	843.495	-0.588854	0.231731	-2.54111	0.0110503	0.0308172
AT3G14130	629.176	-0.821364	0.208782	-3.93408	8.35151e-05	0.000561941
AT3G14400	2785.94	-0.49324	0.101499	-4.85957	1.17642e-06	1.52169e-05
AT3G14580	84.7447	-0.832177	0.377551	-2.20415	0.0275141	0.0634178
AT3G14610	1039.11	-1.00357	0.269146	-3.72871	0.000192466	0.00113172
AT3G14650	6771.67	-0.867737	0.185874	-4.66842	3.03521e-06	3.44264e-05
AT3G14660	13126.9	-1.25068	0.319591	-3.91336	9.10188e-05	0.000607382
AT3G14680	1560.27	-0.926623	0.286169	-3.23803	0.00120357	0.00510707
AT3G14690	10663.7	-1.56881	0.368535	-4.25688	2.07304e-05	0.000174644
AT3G14770	2979.78	-1.58236	0.285996	-5.53281	3.15139e-08	6.76295e-07
AT3G14810	2302.17	-0.517578	0.221535	-2.33633	0.0194741	0.0480743
AT3G14840	4987.79	-0.630616	0.274475	-2.29754	0.0215881	0.0523463
AT3G14860	1646.01	-0.406764	0.12778	-3.18332	0.00145596	0.00596869
AT3G14960	889.003	-0.343812	0.105794	-3.24983	0.00115472	0.00493369
AT3G14990	23115.8	-0.951781	0.310667	-3.06367	0.00218639	0.0083134
AT3G15010	3502.68	-0.368302	0.139766	-2.63514	0.00841033	0.0246629
AT3G15060	1223.01	-0.919968	0.368254	-2.49819	0.0124829	0.0339438
AT3G15070	1930.14	-0.42603	0.13739	-3.10087	0.00192952	0.00749758
AT3G15080	434.137	-0.827943	0.203613	-4.06626	4.77744e-05	0.000351743
AT3G15270	284.129	-1.60182	0.787377	-2.03438	0.0419135	0.0888868
AT3G15352	641.696	-1.08767	0.385565	-2.82097	0.00478784	0.0156614
AT3G15354	3407.71	-0.419721	0.211109	-1.98817	0.0467926	0.0969654
AT3G15356	6011.58	-1.84153	0.484787	-3.79864	0.00014549	0.000901335
AT3G15380	1311.44	-0.322223	0.143102	-2.2517	0.0243412	0.0577251
AT3G15450	64178.2	-2.26528	0.361181	-6.27186	3.56764e-10	1.2213e-08
AT3G15500	1100.49	-2.2424	0.534737	-4.19347	2.74725e-05	0.000221875
AT3G15510	1039.58	-1.0737	0.241962	-4.43745	9.10294e-06	8.75681e-05
AT3G15518	228.2	-1.25343	0.564429	-2.22071	0.0263709	0.0613936
AT3G15590	2248.47	-1.34129	0.255108	-5.25773	1.45844e-07	2.5424e-06
AT3G15610	2174.12	-0.323549	0.0998396	-3.24069	0.00119241	0.00506417
AT3G15620	1360.65	-3.36316	0.457279	-7.35471	1.91336e-13	1.37217e-11
AT3G15630	3461.25	-1.47278	0.331974	-4.43643	9.14632e-06	8.79024e-05
AT3G15660	2363.75	-0.436604	0.19594	-2.22826	0.0258633	0.060499
AT3G15850	20300.1	-0.798403	0.251534	-3.17414	0.00150284	0.006121
AT3G15950	14998.4	-0.589225	0.227082	-2.59476	0.0094656	0.0271618
AT3G16030	1007.87	-1.27715	0.295305	-4.32486	1.52628e-05	0.000135112
AT3G16170	1138.24	-0.438945	0.19196	-2.28665	0.0222164	0.053606
AT3G16190	2239.3	-1.11658	0.279955	-3.98844	6.65103e-05	0.000465778
AT3G16220	2265.02	-1.11195	0.343428	-3.2378	0.00120455	0.00510809
AT3G16310	1907.82	-0.499273	0.230452	-2.16649	0.0302738	0.0685516
AT3G16510	296.423	-0.708547	0.348623	-2.03242	0.0421112	0.0891928
AT3G16530	3964.39	-1.53818	0.463771	-3.31668	0.00091094	0.00406686
AT3G16565	484.325	-1.65424	0.322765	-5.12522	2.97189e-07	4.6576e-06
AT3G16640	76840.3	-1.2531	0.217869	-5.75164	8.83822e-09	2.20101e-07
AT3G16770	12285.2	-1.49467	0.334334	-4.4706	7.80003e-06	7.74602e-05
AT3G16810	1417.55	-0.953337	0.250979	-3.79848	0.000145587	0.000901448
AT3G16860	454.522	-1.21288	0.513415	-2.36238	0.0181582	0.0456513
AT3G16910	3112.98	0.480913	0.226273	2.12537	0.0335556	0.0744358
AT3G17020	6411.73	-0.586031	0.154874	-3.78392	0.00015438	0.000950177
AT3G17225	66.21	-1.46503	0.426637	-3.43391	0.000594932	0.00285643
AT3G17510	12784.9	-0.422126	0.153384	-2.75209	0.00592171	0.0185305
AT3G17590	1004.03	-0.894168	0.274559	-3.25674	0.00112701	0.0048445
AT3G17609	923.029	-0.731731	0.364202	-2.00913	0.0445229	0.0932684
AT3G17770	8570.77	-1.28002	0.216457	-5.9135	3.34907e-09	9.07854e-08
AT3G17910	667.744	-0.649183	0.215666	-3.01014	0.0026113	0.00960046
AT3G18030	623.231	-0.391817	0.149133	-2.62731	0.00860639	0.0251478
AT3G18100	497.103	-0.581433	0.20472	-2.84013	0.00450947	0.0149418
AT3G18250	451.87	-2.99099	0.704837	-4.24353	2.20036e-05	0.000184002
AT3G18290	46584.9	-1.89131	0.323806	-5.84086	5.19309e-09	1.34038e-07
AT3G18600	1550.69	-0.717866	0.296263	-2.42307	0.01539	0.0400698
AT3G18610	133.128	-2.74248	0.898326	-3.05288	0.00226654	0.00855217
AT3G18773	753.229	-0.764602	0.346369	-2.20748	0.0272806	0.0630104
AT3G18840	35.5637	-1.47636	0.620367	-2.37982	0.0173211	0.0440255
AT3G18990	1600.09	0.244739	0.108381	2.25812	0.0239379	0.0569953
AT3G19030	2005.93	-1.3548	0.303588	-4.46261	8.09674e-06	7.97083e-05
AT3G19170	37403.9	-1.12184	0.263201	-4.26231	2.02327e-05	0.00017096
AT3G19280	394.434	-0.40331	0.196563	-2.05181	0.0401879	0.085951
AT3G19290	3116.59	-0.800223	0.273067	-2.9305	0.00338418	0.0118215
AT3G19360	336.923	-0.544396	0.257302	-2.11578	0.0343634	0.0758269
AT3G19420	5711.13	-0.332613	0.117738	-2.82502	0.00472777	0.0154917
AT3G19440	286.442	-0.879953	0.233634	-3.76636	0.000165642	0.00100583
AT3G19490	2963.14	-0.505192	0.148952	-3.39163	0.000694772	0.00324906
AT3G19520	2353.51	-0.679501	0.159294	-4.26571	1.99267e-05	0.000169094
AT3G19590	565.518	0.385752	0.184501	2.09079	0.0365468	0.079545
AT3G19615	435.69	-5.75582	1.21656	-4.73121	2.23188e-06	2.63706e-05
AT3G19810	1947.75	-0.983447	0.295717	-3.32564	0.000882161	0.00395715
AT3G19870	2261.92	-0.340219	0.163539	-2.08036	0.0374927	0.0811978
AT3G19910	3809.5	-1.15401	0.246645	-4.67884	2.88509e-06	3.28883e-05
AT3G20100	2221.27	-0.920675	0.264622	-3.47921	0.000502898	0.00248402
AT3G20240	343.066	-0.626007	0.214396	-2.91987	0.00350178	0.0121676
AT3G20340	462.613	-2.11846	0.470514	-4.50244	6.7179e-06	6.81472e-05
AT3G20395	239.151	-3.17401	0.454449	-6.98431	2.86261e-12	1.59001e-10
AT3G20410	3946.18	-1.09203	0.245725	-4.4441	8.82599e-06	8.56227e-05
AT3G20470	3494.62	-1.02932	0.42249	-2.43631	0.014838	0.0388649
AT3G20620	546.181	-0.585011	0.294491	-1.98651	0.0469763	0.0972571
AT3G20630	3440.09	-0.535027	0.168564	-3.17402	0.00150342	0.00612118
AT3G20660	950.014	-1.2279	0.337137	-3.64213	0.000270395	0.00150262
AT3G20770	10873.9	-0.353938	0.136064	-2.60126	0.00928815	0.0267388
AT3G21140	1067.17	-0.64825	0.198628	-3.26363	0.00109994	0.0047429
AT3G21160	1630.11	-0.410919	0.185558	-2.21451	0.0267937	0.0621749
AT3G21220	1184.32	-1.00595	0.227538	-4.42104	9.82286e-06	9.34038e-05
AT3G21250	8092.49	-0.967231	0.299344	-3.23117	0.00123286	0.00520086
AT3G21260	881.268	-1.10407	0.289159	-3.8182	0.000134427	0.000843876
AT3G21351	88.2928	-2.18016	0.624553	-3.49075	0.000481664	0.0023906
AT3G21390	1402.33	-0.679885	0.249571	-2.72422	0.00644543	0.019846
AT3G21420	361.176	-0.846726	0.343047	-2.46825	0.0135776	0.0362763
AT3G21520	257.043	-0.886337	0.4059	-2.18363	0.0289892	0.0661718
AT3G21530	795.751	-0.626425	0.210325	-2.97837	0.00289786	0.0104572
AT3G21540	1130.9	-1.15292	0.267166	-4.31538	1.59329e-05	0.000140604
AT3G21600	760.21	-1.2218	0.249453	-4.89792	9.68572e-07	1.29116e-05
AT3G21670	3247.36	-0.515816	0.228828	-2.25417	0.0241857	0.0574524
AT3G21690	5917.64	-0.712071	0.232968	-3.05651	0.00223928	0.00848322
AT3G21720	2441.63	-4.31093	0.720886	-5.98005	2.23076e-09	6.33501e-08
AT3G21740	247.716	-0.509716	0.251928	-2.02326	0.0430462	0.0906948
AT3G21780	403.437	-1.95652	0.422431	-4.63158	3.62886e-06	4.03519e-05
AT3G22060	2768.22	-1.39648	0.29198	-4.7828	1.72867e-06	2.11529e-05
AT3G22120	26992.1	-1.40721	0.194733	-7.22636	4.96121e-13	3.19406e-11
AT3G22160	477.981	-1.59246	0.415029	-3.83699	0.000124552	0.000789316
AT3G22200	9466.46	-0.365452	0.109637	-3.33328	0.000858271	0.00388226
AT3G22260	709.345	-0.836666	0.253216	-3.30416	0.000952615	0.00422127
AT3G22290	2281.92	-0.790905	0.190502	-4.15168	3.30041e-05	0.000258445
AT3G22320	2995.28	-0.502804	0.239474	-2.09962	0.0357625	0.0782589
AT3G22330	3187.98	-0.904345	0.24348	-3.71425	0.000203803	0.00118669
AT3G22370	9220.59	-2.18105	0.403307	-5.40792	6.37613e-08	1.25649e-06
AT3G22460	897.316	-2.04777	0.224226	-9.13262	6.68587e-20	1.2219e-17
AT3G22750	2324.31	-2.0466	0.206916	-9.89099	4.55512e-23	1.47469e-20
AT3G22910	606.417	-1.13511	0.420954	-2.69652	0.00700677	0.0212738
AT3G22942	475.241	-0.641481	0.252559	-2.53992	0.0110877	0.0308912
AT3G23250	511.273	-3.51349	0.793111	-4.43001	9.42297e-06	9.0255e-05
AT3G23370	123.338	-1.36134	0.40233	-3.38365	0.000715294	0.00332445
AT3G23400	15065.3	-0.65257	0.326352	-1.99959	0.0455449	0.0948832
AT3G23510	749.322	-2.51308	0.372754	-6.74192	1.56307e-11	7.41054e-10
AT3G23530	6382.14	-0.356105	0.170008	-2.09464	0.0362032	0.0789186
AT3G23560	2882.01	-1.55776	0.331721	-4.696	2.65305e-06	3.05196e-05
AT3G23580	1957.63	-0.943068	0.311039	-3.03199	0.00242945	0.0090197
AT3G23620	1873.61	-0.750439	0.284012	-2.64228	0.00823497	0.0242302
AT3G23700	12624.4	-0.746255	0.297974	-2.50443	0.0122647	0.0334952
AT3G23730	2808.7	-0.600232	0.257832	-2.32799	0.0199126	0.0489753
AT3G24000	396.284	-1.2474	0.252746	-4.93538	7.99928e-07	1.09336e-05
AT3G24160	12198.7	-0.375251	0.177886	-2.1095	0.0349016	0.0767009
AT3G24180	4606.89	-0.459971	0.158243	-2.90673	0.00365223	0.0126092
AT3G24350	1846.77	-0.18399	0.0852082	-2.1593	0.0308265	0.06955
AT3G24495	349.567	0.454553	0.222522	2.04274	0.0410787	0.0874436
AT3G25250	468.448	-1.27878	0.593357	-2.15517	0.0311488	0.0701127
AT3G25410	2445.57	-1.22296	0.292868	-4.17582	2.96916e-05	0.000237428
AT3G25430	470.307	-1.00496	0.176442	-5.69571	1.2286e-08	2.96197e-07
AT3G25530	6970.13	0.296376	0.143965	2.05866	0.0395266	0.084788
AT3G25545	645.685	-0.50302	0.231428	-2.17355	0.0297391	0.0675568
AT3G25610	2013.96	-1.26175	0.423225	-2.98127	0.00287051	0.0103817
AT3G25690	28291.9	-0.558709	0.264348	-2.11354	0.0345547	0.076101
AT3G25740	870.37	-1.39879	0.395478	-3.53697	0.000404746	0.00207896
AT3G25910	4589.89	-0.737996	0.147236	-5.01234	5.37729e-07	7.7717e-06
AT3G26030	5244.85	-1.23957	0.337037	-3.67783	0.000235224	0.00134009
AT3G26040	164.063	-1.55321	0.448265	-3.46493	0.000530372	0.00260158
AT3G26210	1571	-1.8154	0.490181	-3.70352	0.000212626	0.00122985
AT3G26290	1651.19	-2.43802	0.371868	-6.55615	5.52134e-11	2.27499e-09
AT3G26300	2350.58	-0.396099	0.16865	-2.34864	0.0188421	0.0469128
AT3G26380	1727.49	-0.576395	0.208615	-2.76296	0.00572798	0.0180188
AT3G26500	490.838	-0.788146	0.349456	-2.25535	0.0241112	0.0572875
AT3G26540	308.479	-0.729357	0.236537	-3.08347	0.002046	0.00786938
AT3G26580	4716.4	-1.14275	0.271929	-4.20237	2.64131e-05	0.000214254
AT3G26590	2094.81	-0.780821	0.354438	-2.20299	0.0275957	0.0635802
AT3G26670	2338.4	-0.768883	0.254437	-3.0219	0.00251195	0.00929551
AT3G26690	1569.33	-0.975717	0.287941	-3.3886	0.000702506	0.00327846
AT3G26710	9336.38	-0.860855	0.30774	-2.79735	0.00515241	0.0165905
AT3G26740	21797.5	-2.17998	0.217255	-10.0342	1.07866e-23	4.03634e-21
AT3G26830	1272.21	-2.6137	0.871617	-2.99868	0.00271151	0.00991102
AT3G26840	985.684	-1.59087	0.54007	-2.94566	0.00322262	0.0113933
AT3G26910	1696.42	-0.916283	0.330297	-2.77412	0.00553513	0.0175338
AT3G26980	1529.28	-1.00701	0.368009	-2.73637	0.00621219	0.019285
AT3G27060	7314.64	-1.93839	0.203603	-9.52042	1.72484e-21	4.15832e-19
AT3G27110	2946.45	-0.853921	0.294394	-2.9006	0.00372445	0.0128078
AT3G27260	4524.97	-0.485568	0.217991	-2.22747	0.025916	0.0605848
AT3G27300	3123.53	-0.63321	0.206779	-3.06225	0.00219681	0.00834742
AT3G27390	3484.14	-0.97012	0.219057	-4.42862	9.4837e-06	9.0717e-05
AT3G27475	433.046	-6.70144	1.2115	-5.53154	3.17434e-08	6.78649e-07
AT3G27550	398.408	-1.65776	0.367752	-4.50781	6.54997e-06	6.66826e-05
AT3G27560	1178.6	-0.721171	0.225212	-3.20219	0.00136387	0.00565729
AT3G27770	9517.6	-1.63189	0.162671	-10.0318	1.10428e-23	4.03634e-21
AT3G27870	1377.77	-1.2716	0.2884	-4.40915	1.03776e-05	9.75835e-05
AT3G27950	11.8717	-1.99112	0.838883	-2.37354	0.0176187	0.0446515
AT3G28050	2566.2	0.491289	0.15206	3.23089	0.00123407	0.00520402
AT3G28100	887.032	-0.742006	0.245472	-3.02277	0.00250471	0.00927176
AT3G28200	3039.04	-1.00951	0.228719	-4.41374	1.01598e-05	9.56155e-05
AT3G28210	907.742	-1.58909	0.557929	-2.8482	0.00439675	0.0146657
AT3G28340	590.861	-2.03446	0.606531	-3.35426	0.000795779	0.00364764
AT3G28580	565.695	-2.14455	0.749205	-2.86244	0.00420395	0.0141813
AT3G28670	1161.6	-0.425839	0.155233	-2.74322	0.00608408	0.0189653
AT3G28740	2992.54	-1.85897	0.410007	-4.534	5.78772e-06	5.97274e-05
AT3G28910	1196.91	-0.568985	0.14876	-3.82485	0.00013085	0.000825998
AT3G28930	1238.65	-1.28727	0.426467	-3.01845	0.00254073	0.00938364
AT3G29000	196.634	-1.99402	0.828712	-2.40617	0.0161205	0.0415704
AT3G29035	1348.79	-1.19197	0.312106	-3.81911	0.000133934	0.000842113
AT3G29090	1224.29	-0.621741	0.253626	-2.45141	0.0142298	0.0375496
AT3G29100	245.924	-0.812299	0.241469	-3.36399	0.000768244	0.00353609
AT3G29160	2844.82	-0.764286	0.2379	-3.21263	0.00131526	0.00548518
AT3G29360	6355.81	0.388581	0.196469	1.97782	0.0479491	0.0989823
AT3G29400	901.73	-0.710242	0.257847	-2.75451	0.00587809	0.0184141
AT3G29631	1051.68	-2.52363	0.879251	-2.8702	0.00410209	0.0138808
AT3G29810	1015.73	-2.64363	0.501253	-5.27405	1.33444e-07	2.37549e-06
AT3G30380	856.082	-0.334729	0.164176	-2.03885	0.0414654	0.0880684
AT3G30775	42781.1	-3.21711	0.428963	-7.49974	6.39459e-14	5.10262e-12
AT3G33520	1533.15	-0.448135	0.11976	-3.74194	0.000182606	0.00108671
AT3G42640	587.323	-0.368988	0.179257	-2.05843	0.0395486	0.0848081
AT3G43580	81.6943	-1.3458	0.415932	-3.23561	0.00121382	0.00514544
AT3G43600	4936.68	-1.06873	0.239681	-4.45895	8.23624e-06	8.08383e-05
AT3G43790	190.072	-1.03268	0.350861	-2.94328	0.00324751	0.0114598
AT3G44300	46003.6	-3.59208	0.551932	-6.5082	7.6057e-11	3.02387e-09
AT3G44370	875.388	-0.899039	0.192445	-4.67166	2.98776e-06	3.39903e-05
AT3G44430	1377.06	-0.93035	0.177033	-5.25525	1.47824e-07	2.56901e-06
AT3G44480	5130.91	-0.571351	0.256124	-2.23076	0.0256972	0.0602176
AT3G44600	1751.97	-0.565394	0.144249	-3.91957	8.8707e-05	0.000594757
AT3G44670	4649.95	-0.587814	0.24967	-2.35437	0.0185544	0.046431
AT3G44680	1215	-0.883483	0.168029	-5.25794	1.4568e-07	2.5424e-06
AT3G44820	567.604	-0.68431	0.153802	-4.4493	8.61525e-06	8.37934e-05
AT3G45040	1572.86	-0.586593	0.164979	-3.55556	0.000377174	0.00196766
AT3G45060	796.827	-4.27147	0.476649	-8.96147	3.2037e-19	5.41807e-17
AT3G45130	973.236	-3.7582	0.582661	-6.45006	1.11804e-10	4.35346e-09
AT3G45240	1621.04	-0.51659	0.234202	-2.20575	0.0274015	0.0632355
AT3G45290	519.738	-1.57807	0.384918	-4.09976	4.13573e-05	0.000311997
AT3G45300	15781.1	-3.60232	0.392926	-9.16793	4.8221e-20	9.27854e-18
AT3G45730	2628.72	-2.64858	0.362779	-7.3008	2.86064e-13	1.91798e-11
AT3G45970	8673.54	-2.58771	0.517287	-5.00247	5.66016e-07	8.12868e-06
AT3G46010	5112.03	-0.312321	0.156532	-1.99526	0.046015	0.095669
AT3G46080	1233.88	-3.82412	0.762991	-5.012	5.38659e-07	7.77522e-06
AT3G46090	594.843	-2.49135	0.76021	-3.27719	0.00104847	0.00456582
AT3G46110	255.276	-1.15579	0.387163	-2.98528	0.0028332	0.0102664
AT3G46210	756.875	-1.08803	0.242907	-4.4792	7.49241e-06	7.49969e-05
AT3G46230	491.22	-1.43688	0.727974	-1.9738	0.0484042	0.0996853
AT3G46280	1704.72	-1.83348	0.714163	-2.56731	0.010249	0.0289895
AT3G46530	2966.31	-0.6724	0.219215	-3.06731	0.00215994	0.0082294
AT3G46550	1372.89	0.477355	0.241148	1.97951	0.0477585	0.0986602
AT3G46620	1672.85	-0.454593	0.2219	-2.04864	0.0404978	0.0864507
AT3G46640	1213.55	-1.04097	0.255813	-4.06926	4.71625e-05	0.000348419
AT3G46690	1003.41	-2.72018	0.363863	-7.47584	7.67105e-14	6.03616e-12
AT3G46790	725.753	-0.373849	0.171085	-2.18517	0.0288762	0.0659405
AT3G46820	1585.84	-0.634229	0.162715	-3.8978	9.70705e-05	0.000640225
AT3G46830	1790.21	0.455505	0.165487	2.75251	0.00591403	0.0185116
AT3G47090	327.734	-3.2653	0.897929	-3.63648	0.000276393	0.00152995
AT3G47120	914.361	-0.644815	0.191958	-3.35914	0.000781861	0.00359256
AT3G47160	1850.37	-2.01677	0.220574	-9.14327	6.05895e-20	1.14423e-17
AT3G47250	7330.37	-1.16437	0.17894	-6.50703	7.66513e-11	3.03684e-09
AT3G47290	2476.92	-0.782106	0.189188	-4.13402	3.56472e-05	0.000276656
AT3G47340	56913.9	-3.23189	0.505953	-6.38773	1.68368e-10	6.23455e-09
AT3G47480	669.878	-2.93888	0.758315	-3.87554	0.00010639	0.000692422
AT3G47550	1397.94	-0.553931	0.187631	-2.95224	0.00315473	0.0111877
AT3G47570	749.138	-0.858112	0.310976	-2.75942	0.00579046	0.018175
AT3G47580	305.406	-1.08569	0.341867	-3.17577	0.00149439	0.00609537
AT3G47640	2251.41	-1.898	0.293915	-6.45766	1.06332e-10	4.15465e-09
AT3G47670	1059.2	-0.234323	0.0962892	-2.43353	0.0149522	0.0390827
AT3G47720	149.089	-5.37197	1.12338	-4.78196	1.73594e-06	2.1219e-05
AT3G47800	6118.01	-1.65497	0.266366	-6.21315	5.19338e-10	1.71065e-08
AT3G47965	801.331	-1.15171	0.346544	-3.32342	0.0008892	0.003984
AT3G48000	23682.8	-1.40435	0.272492	-5.15375	2.55322e-07	4.09201e-06
AT3G48195	1497.03	-0.306991	0.148483	-2.06752	0.0386856	0.0833201
AT3G48250	317.015	-1.35301	0.314572	-4.30111	1.69944e-05	0.000148517
AT3G48330	1103.55	0.31749	0.149766	2.11991	0.0340136	0.0752162
AT3G48360	25805.3	-2.17239	0.415759	-5.22512	1.74045e-07	2.96111e-06
AT3G48390	928.591	-3.09432	0.506173	-6.11316	9.76783e-10	3.04064e-08
AT3G48580	320.105	-3.06275	0.705651	-4.34032	1.42275e-05	0.000127038
AT3G48780	3450.59	-0.502932	0.170742	-2.94556	0.00322368	0.0113935
AT3G48830	220.291	-1.94026	0.432134	-4.48995	7.12398e-06	7.17527e-05
AT3G48850	200.774	-1.69958	0.715264	-2.37616	0.017494	0.0444151
AT3G48990	41345.1	-1.53812	0.278039	-5.53202	3.16564e-08	6.78069e-07
AT3G49010	13088.3	0.388987	0.169387	2.29644	0.0216509	0.0524875
AT3G49120	13859	-0.740498	0.358725	-2.06425	0.0389942	0.083889
AT3G49140	6513.54	-0.575323	0.251049	-2.29168	0.0219241	0.0530734
AT3G49490	5074.24	-0.547258	0.157362	-3.47769	0.000505745	0.00249482
AT3G49620	2784.61	-4.7354	0.806802	-5.86935	4.37516e-09	1.15023e-07
AT3G49630	257.4	-7.8051	0.983817	-7.93348	2.13082e-15	2.15574e-13
AT3G49645	388.819	-0.845092	0.189793	-4.4527	8.47973e-06	8.26883e-05
AT3G49720	4583.08	0.402306	0.134535	2.99034	0.00278663	0.01013
AT3G49780	3146.19	-2.09928	0.438122	-4.79155	1.65498e-06	2.04499e-05
AT3G49790	3578.99	-1.62018	0.311744	-5.19716	2.02358e-07	3.35728e-06
AT3G49940	3693.08	-0.619026	0.248131	-2.49476	0.0126042	0.0341707
AT3G50000	4811.87	-0.517725	0.100631	-5.14481	2.67792e-07	4.24979e-06
AT3G50010	189.397	-2.90222	0.83574	-3.47263	0.000515383	0.00253684
AT3G50260	468.799	-1.24746	0.476024	-2.62059	0.00877779	0.0255684
AT3G50480	8629.11	-2.37168	0.478158	-4.96003	7.04824e-07	9.71577e-06
AT3G50550	1286.21	-0.72196	0.285422	-2.52945	0.0114242	0.0316265
AT3G50670	6795.2	-0.529863	0.164332	-3.22433	0.00126266	0.00529898
AT3G50690	3946	-0.344089	0.162154	-2.12199	0.0338388	0.0749183
AT3G50770	1491.94	-4.04057	0.713919	-5.65971	1.51633e-08	3.54991e-07
AT3G50880	1028.52	-0.386368	0.106955	-3.61243	0.000303339	0.00164851
AT3G50930	2161.8	-2.13174	0.746579	-2.85535	0.00429892	0.0144286
AT3G51000	3899.42	-1.20806	0.305632	-3.95267	7.72845e-05	0.000527219
AT3G51160	3340.76	0.386999	0.170135	2.27466	0.0229265	0.0549566
AT3G51325	63.2144	-1.40122	0.551559	-2.54047	0.0110704	0.0308583
AT3G51370	7048.83	-0.445532	0.130328	-3.41854	0.000629588	0.0029949
AT3G51440	521.488	-0.652955	0.261032	-2.50144	0.012369	0.0337067
AT3G51530	534.158	-0.716859	0.296482	-2.41788	0.0156112	0.0405713
AT3G51550	22371.8	-0.693919	0.249832	-2.77755	0.00547711	0.0173792
AT3G51580	1444.34	-0.455037	0.110684	-4.11113	3.93721e-05	0.000299645
AT3G51600	25998.1	-1.21456	0.290351	-4.18307	2.87599e-05	0.000230956
AT3G51660	975.116	-1.97117	0.321446	-6.13218	8.66819e-10	2.72075e-08
AT3G51670	7926.05	-1.06729	0.209852	-5.08593	3.65826e-07	5.55653e-06
AT3G51790	722.988	-1.15919	0.301367	-3.84645	0.000119842	0.000762025
AT3G51840	19186.5	-1.40845	0.254661	-5.53068	3.18996e-08	6.80705e-07
AT3G51860	4294.54	-1.26321	0.467141	-2.70412	0.00684847	0.0208648
AT3G51870	1326.25	-1.08611	0.248027	-4.37902	1.19215e-05	0.000109645
AT3G51910	2608.03	-1.06611	0.452743	-2.35478	0.0185336	0.0463892
AT3G51920	5320.9	-0.517718	0.248707	-2.08163	0.0373759	0.0809763
AT3G52050	1373.14	-0.497499	0.234691	-2.1198	0.0340228	0.075222
AT3G52340	4138.52	-0.57295	0.162347	-3.52917	0.000416872	0.00213158
AT3G52400	3724.39	-1.55312	0.463742	-3.3491	0.000810741	0.00369678
AT3G52450	349.648	-0.92055	0.269853	-3.4113	0.00064653	0.00305509
AT3G52770	58.7141	-1.32569	0.496317	-2.67106	0.00756117	0.0225997
AT3G52840	7442.71	-0.420452	0.177657	-2.36665	0.0179501	0.0452688
AT3G52850	9926.91	-0.396384	0.149416	-2.65289	0.00798068	0.0236416
AT3G52905	430.129	-0.975568	0.261502	-3.73064	0.000190994	0.00112482
AT3G52940	972.762	0.46681	0.198019	2.3574	0.0184032	0.0461648
AT3G53160	244.723	-2.17325	0.56248	-3.8637	0.000111684	0.000720668
AT3G53180	4772.93	-0.350373	0.133089	-2.63262	0.0084728	0.024814
AT3G53360	188.821	-0.661446	0.232494	-2.845	0.00444112	0.014792
AT3G53630	2778.82	-1.12579	0.252143	-4.46489	8.01089e-06	7.90692e-05
AT3G53810	1089.42	-1.25836	0.344243	-3.65545	0.000256729	0.00144295
AT3G53930	1170.62	-0.564967	0.148569	-3.80273	0.000143113	0.00088953
AT3G54100	1400.13	-0.651776	0.237988	-2.73869	0.00616837	0.0191906
AT3G54140	3344.15	-0.702764	0.198202	-3.5457	0.000391577	0.00202601
AT3G54150	874.117	-3.44059	0.69328	-4.96278	6.94918e-07	9.61431e-06
AT3G54350	2087.76	-0.423359	0.170166	-2.48792	0.0128491	0.0346848
AT3G54740	554.835	0.441375	0.203668	2.16713	0.0302252	0.0684963
AT3G54880	3130.03	-1.71885	0.36879	-4.66077	3.15022e-06	3.55884e-05
AT3G54950	759.448	-0.438149	0.214679	-2.04095	0.041256	0.0876893
AT3G55020	5693.53	-0.354143	0.117683	-3.0093	0.00261854	0.00962397
AT3G55060	398.974	-0.597122	0.294652	-2.02653	0.0427105	0.0901995
AT3G55430	5846.13	-0.822829	0.394094	-2.0879	0.036807	0.0800347
AT3G55470	951.326	-1.09452	0.385243	-2.84113	0.00449546	0.0149145
AT3G55510	882.419	-1.11722	0.391071	-2.85681	0.00427924	0.0143711
AT3G55560	1819.8	-0.690819	0.245992	-2.8083	0.00498045	0.0161562
AT3G55610	15968	-1.16747	0.263095	-4.43743	9.10381e-06	8.75681e-05
AT3G55840	492.725	-1.7381	0.545489	-3.18631	0.00144101	0.00592241
AT3G55880	610.661	-0.690875	0.339543	-2.03472	0.0418792	0.0888306
AT3G56010	3525.36	-0.90482	0.262117	-3.45197	0.00055651	0.00270752
AT3G56050	3228.78	0.455355	0.106372	4.28076	1.86257e-05	0.000159856
AT3G56140	6357.46	-1.04444	0.274063	-3.81095	0.000138436	0.000864729
AT3G56190	6335.29	-0.235203	0.0951352	-2.47231	0.0134244	0.0359179
AT3G56310	6352.59	-0.541651	0.158261	-3.42252	0.00062043	0.00296129
AT3G56360	31067.4	-0.98675	0.291586	-3.38407	0.000714187	0.00332202
AT3G56410	2353.78	-0.644699	0.231267	-2.78768	0.00530864	0.0169682
AT3G56600	7.14935	-2.13031	1.03559	-2.05711	0.0396757	0.0850162
AT3G56880	3625.81	-0.792327	0.38466	-2.05981	0.0394165	0.0845727
AT3G56970	9204.29	-1.72113	0.618417	-2.78313	0.00538373	0.017146
AT3G56980	7499.21	-1.90551	0.474154	-4.01876	5.85041e-05	0.000417187
AT3G57190	1061.85	-1.14685	0.237444	-4.83	1.36535e-06	1.74025e-05
AT3G57300	5568.76	-0.720796	0.214438	-3.36133	0.000775675	0.00356559
AT3G57410	12007.1	-0.903612	0.176047	-5.13278	2.85497e-07	4.49926e-06
AT3G57430	478.771	-1.5043	0.349994	-4.29809	1.7228e-05	0.000149931
AT3G57470	3662.09	-0.596092	0.265388	-2.24612	0.0246964	0.0583964
AT3G57520	50211.3	-2.60812	0.383398	-6.80265	1.02713e-11	5.0602e-10
AT3G57660	2138.09	-1.21192	0.329269	-3.68065	0.000232642	0.00132732
AT3G57710	802.649	-1.00655	0.313033	-3.21548	0.00130228	0.00543502
AT3G57785	786.491	-0.37272	0.134129	-2.77883	0.00545557	0.0173303
AT3G57930	2388.77	-1.06201	0.285203	-3.72372	0.00019631	0.00114955
AT3G57940	750.225	-0.888564	0.298469	-2.97708	0.00291012	0.0104948
AT3G58020	914.775	-0.838942	0.155195	-5.40572	6.45493e-08	1.26541e-06
AT3G58040	1773.52	-0.263771	0.125807	-2.09663	0.0360263	0.0786388
AT3G58150	532.667	-3.58663	0.4391	-8.16815	3.13165e-16	3.77497e-14
AT3G58270	508.877	-2.03962	0.395158	-5.16153	2.44941e-07	3.93677e-06
AT3G58510	3309.98	-0.303297	0.135925	-2.23135	0.0256579	0.0601743
AT3G58660	1791.83	-0.902624	0.214702	-4.20408	2.62144e-05	0.000212928
AT3G58680	7371.2	-0.741342	0.273279	-2.71277	0.00667243	0.0204173
AT3G58750	6660.81	-1.23054	0.31625	-3.89102	9.98251e-05	0.000654961
AT3G58760	1418.9	-0.263362	0.127647	-2.06321	0.0390923	0.0840202
AT3G59040	3258.7	-1.0154	0.276288	-3.67513	0.000237726	0.00135021
AT3G59050	1924.77	-0.582627	0.165666	-3.51689	0.000436642	0.00221567
AT3G59080	2386.07	-1.0821	0.457385	-2.36583	0.0179895	0.0453278
AT3G59210	1391.76	-0.86588	0.401115	-2.15868	0.0308747	0.0696339
AT3G59310	1617.67	0.464936	0.121683	3.82087	0.000132984	0.000837599
AT3G59350	3780.65	-1.31133	0.369555	-3.5484	0.000387573	0.0020108
AT3G59360	1842.74	-0.327702	0.14126	-2.31985	0.0203488	0.0498535
AT3G59500	1479.37	-0.310796	0.14738	-2.10881	0.0349609	0.0767865
AT3G59640	689.321	-0.805492	0.188673	-4.26924	1.9614e-05	0.000166852
AT3G59700	681.626	-1.73377	0.436598	-3.97109	7.15435e-05	0.000493703
AT3G59930	1350.37	-3.31678	0.350216	-9.47068	2.78041e-21	6.42955e-19
AT3G59940	16011.2	-0.722886	0.365997	-1.97511	0.0482554	0.0995235
AT3G59970	17854.9	0.439517	0.172468	2.5484	0.0108218	0.030303
AT3G60080	1641.16	0.353207	0.163479	2.16056	0.030729	0.0693744
AT3G60120	65.8036	-3.02194	0.987884	-3.059	0.00222074	0.00842142
AT3G60130	4568.09	-1.23457	0.209898	-5.88175	4.05955e-09	1.07726e-07
AT3G60140	24973.9	-4.81306	0.735712	-6.54204	6.06866e-11	2.48245e-09
AT3G60180	674.665	-0.921745	0.20437	-4.51017	6.47759e-06	6.61835e-05
AT3G60190	4151.98	-0.725072	0.207482	-3.49464	0.00047471	0.00236529
AT3G60200	541.812	-0.560328	0.199704	-2.80579	0.0050194	0.0162434
AT3G60300	6015.13	-1.34592	0.300723	-4.47563	7.61854e-06	7.59915e-05
AT3G60510	701.707	-1.11315	0.231114	-4.81645	1.46137e-06	1.84397e-05
AT3G60690	911.754	-2.24787	0.37782	-5.94958	2.68827e-09	7.46587e-08
AT3G60810	1166.94	-0.601396	0.212818	-2.82587	0.00471527	0.0154731
AT3G60980	978.421	-1.29197	0.222486	-5.80697	6.36148e-09	1.61257e-07
AT3G61060	3953.61	-2.4018	0.353629	-6.79186	1.10696e-11	5.40644e-10
AT3G61070	2255.17	-0.665197	0.236074	-2.81774	0.00483623	0.0157969
AT3G61100	615.912	-1.30035	0.19467	-6.6798	2.39266e-11	1.08013e-09
AT3G61113	97.055	-1.62644	0.593308	-2.74132	0.00611935	0.0190558
AT3G61170	259.679	-3.37288	0.931898	-3.61937	0.000295327	0.0016127
AT3G61190	472.743	-1.08639	0.411026	-2.64313	0.00821443	0.0241823
AT3G61200	1699.84	-0.470757	0.214271	-2.19701	0.0280194	0.0643527
AT3G61220	2723.01	-0.658228	0.320821	-2.0517	0.0401991	0.0859588
AT3G61240	3342.69	-0.319188	0.153435	-2.08028	0.0374996	0.0811978
AT3G61415	723.643	-0.571706	0.214588	-2.66421	0.00771703	0.0229807
AT3G61420	2445.76	-0.352629	0.135501	-2.60241	0.00925716	0.0266767
AT3G61440	41661.1	-0.558638	0.145229	-3.84661	0.000119765	0.000761966
AT3G61630	1537.87	-2.25055	0.295582	-7.61394	2.65862e-14	2.29961e-12
AT3G61700	2440.64	-0.499056	0.0944464	-5.28401	1.26387e-07	2.26596e-06
AT3G61790	1582.2	-0.231444	0.116181	-1.9921	0.04636	0.0962627
AT3G61850	637.908	-0.502322	0.227167	-2.21125	0.0270188	0.0625562
AT3G62080	1022.44	-0.733398	0.189348	-3.87328	0.00010738	0.000697661
AT3G62130	1771	-0.275884	0.118019	-2.33762	0.0194072	0.0479301
AT3G62150	4281.44	-2.56324	0.230876	-11.1022	1.22328e-28	1.06623e-25
AT3G62240	2009.66	-0.437329	0.156475	-2.79489	0.00519171	0.0166791
AT3G62860	1123.69	-1.3176	0.310721	-4.24044	2.23078e-05	0.000186134
AT3G62930	167.717	-1.43009	0.299862	-4.76914	1.85014e-06	2.23429e-05
AT3G63090	292.574	-0.857956	0.217412	-3.94623	7.93906e-05	0.000538345
AT3G63110	442.484	-1.33339	0.278974	-4.77963	1.75617e-06	2.1374e-05
AT3G63310	3665.54	-0.57524	0.240641	-2.39045	0.0168277	0.0429738
AT3G63380	1347.63	-1.78936	0.523545	-3.41778	0.000631351	0.00300077
AT3G63470	757.519	-1.95767	0.955387	-2.04908	0.0404541	0.0864226
AT3G63520	27977.5	-0.965808	0.262948	-3.67299	0.000239724	0.00135884
AT4G00060	2932.44	-0.425627	0.205239	-2.07381	0.0380969	0.082271
AT4G00290	1239.27	-0.629755	0.156785	-4.01667	5.90266e-05	0.00042012
AT4G00330	3230.53	-0.827805	0.226143	-3.66053	0.000251693	0.00141746
AT4G00370	7046.09	-0.670111	0.218335	-3.06919	0.00214641	0.00819009
AT4G00550	932.828	-0.254919	0.117893	-2.1623	0.0305951	0.0691248
AT4G00980	271.028	-0.438021	0.181969	-2.40712	0.0160788	0.0414914
AT4G01026	1593.86	-1.0564	0.283975	-3.72005	0.000199185	0.00116195
AT4G01220	569.052	-0.723602	0.211066	-3.42832	0.00060732	0.00290851
AT4G01290	6867.31	-0.411745	0.138897	-2.96439	0.00303281	0.0108406
AT4G01360	198.788	-2.47933	0.817938	-3.03119	0.0024359	0.0090377
AT4G01410	577.839	-0.425957	0.189583	-2.24681	0.0246522	0.0583284
AT4G01540	363.371	-0.996759	0.393063	-2.53588	0.0112166	0.0311508
AT4G01575	394.241	-2.75873	0.250303	-11.0216	3.00822e-28	2.43473e-25
AT4G01590	1678.98	-0.661485	0.265147	-2.49479	0.0126033	0.0341707
AT4G01600	226.05	-0.822863	0.299182	-2.75038	0.00595259	0.0186125
AT4G01660	2283.34	-1.37901	0.309274	-4.45887	8.23938e-06	8.08383e-05
AT4G01750	587.621	-0.97124	0.34425	-2.82133	0.00478255	0.0156486
AT4G01870	8774.78	-2.47328	0.352564	-7.01512	2.29752e-12	1.3082e-10
AT4G02020	3614.91	-0.489059	0.163762	-2.98639	0.00282289	0.0102356
AT4G02150	1458.43	0.352525	0.144594	2.43803	0.0147675	0.0387338
AT4G02230	7415.08	-0.522768	0.197487	-2.64709	0.00811865	0.0239751
AT4G02330	3826.34	-1.49773	0.57005	-2.62737	0.00860479	0.0251478
AT4G02380	28438.7	-2.43732	0.298572	-8.16327	3.26066e-16	3.88911e-14
AT4G02390	927.118	-1.27467	0.248808	-5.12311	3.00544e-07	4.70368e-06
AT4G02410	1055.43	-1.15866	0.360992	-3.20964	0.00132902	0.00553849
AT4G02520	26322.3	-2.11596	0.477801	-4.42854	9.48722e-06	9.0717e-05
AT4G02550	571.478	-1.23103	0.215025	-5.72504	1.03412e-08	2.53628e-07
AT4G02560	1730.43	-0.329544	0.130323	-2.52867	0.0114497	0.0316738
AT4G02570	12071.5	-0.457255	0.130779	-3.49639	0.000471604	0.002352
AT4G02650	50.3847	-1.97345	0.821825	-2.4013	0.016337	0.0419951
AT4G02860	2587.87	-0.52881	0.219317	-2.41117	0.0159017	0.041175
AT4G02940	3071.96	0.398617	0.197426	2.01907	0.0434798	0.0913873
AT4G03020	8016.53	-1.45979	0.267883	-5.44933	5.0559e-08	1.01575e-06
AT4G03090	985.018	-0.306585	0.155344	-1.97359	0.0484283	0.0997166
AT4G03320	818.417	-0.826242	0.350964	-2.35421	0.0185624	0.0464317
AT4G03390	3575.7	-0.458073	0.206491	-2.21837	0.0265297	0.0616885
AT4G03420	1551.98	-1.27774	0.18732	-6.82114	9.03232e-12	4.52855e-10
AT4G03460	66.4487	-1.19579	0.487216	-2.45434	0.0141144	0.0373407
AT4G03510	2946.8	-2.12006	0.349027	-6.0742	1.24605e-09	3.79142e-08
AT4G04040	6360.28	-0.54857	0.198434	-2.76449	0.00570121	0.0179595
AT4G04180	334.496	-1.08065	0.29783	-3.62842	0.000285163	0.00156759
AT4G04320	2002.69	-0.87573	0.187522	-4.67002	3.01167e-06	3.41936e-05
AT4G04620	1816.72	-1.1603	0.279702	-4.14834	3.34899e-05	0.000261579
AT4G04670	677.988	-0.783766	0.161207	-4.86186	1.16289e-06	1.51109e-05
AT4G04740	2879.98	-1.0937	0.254947	-4.28992	1.78735e-05	0.000154711
AT4G04850	9581.03	-1.18326	0.227657	-5.19757	2.01914e-07	3.35728e-06
AT4G04885	1895.86	-0.73575	0.16575	-4.43892	9.04103e-06	8.72605e-05
AT4G04920	2645.3	-0.499377	0.152033	-3.28465	0.00102107	0.00447574
AT4G04940	665.323	-0.945848	0.293229	-3.22563	0.00125694	0.00528083
AT4G04990	96.4726	-0.954413	0.377027	-2.53142	0.0113602	0.0314957
AT4G05130	128.811	-1.96582	0.996115	-1.97349	0.0484399	0.0997224
AT4G05330	823.339	-1.16338	0.24484	-4.7516	2.01818e-06	2.42245e-05
AT4G05380	66.4773	-2.91556	0.636536	-4.58035	4.64197e-06	4.94344e-05
AT4G05410	1047.36	-0.781955	0.208557	-3.74936	0.000177286	0.00106007
AT4G06744	1029.09	0.448552	0.213326	2.10266	0.0354956	0.0778101
AT4G06746	349.803	-2.80132	0.538206	-5.20492	1.94081e-07	3.24355e-06
AT4G07410	4099.59	-0.593848	0.179203	-3.31383	0.00092026	0.00409885
AT4G07825	2399.36	-0.824406	0.232922	-3.53941	0.000401015	0.00206353
AT4G07990	1283.38	-0.775159	0.254489	-3.04594	0.00231954	0.00869712
AT4G08290	1447.3	-0.668561	0.32231	-2.07428	0.0380532	0.0822081
AT4G08360	490.78	-2.10449	0.897566	-2.34467	0.0190441	0.0472806
AT4G08480	1276.98	-0.402868	0.195382	-2.06195	0.0392121	0.084214
AT4G08540	1769.28	-0.624395	0.178227	-3.50338	0.000459396	0.00230532
AT4G08555	1095.4	-3.22977	0.705404	-4.57861	4.68076e-06	4.97073e-05
AT4G08850	10287.3	-1.33016	0.302587	-4.39597	1.10277e-05	0.000102506
AT4G09000	17932.1	0.266754	0.105395	2.53099	0.0113741	0.0315188
AT4G09020	1296.96	-0.854626	0.292371	-2.92309	0.00346575	0.012061
AT4G09340	1237.06	-0.523444	0.184886	-2.83117	0.00463776	0.0152585
AT4G09420	513.693	-2.05478	0.572716	-3.58778	0.000333505	0.00177749
AT4G09630	2098.77	-0.40446	0.202471	-1.99762	0.0457575	0.095206
AT4G09760	3821.63	-1.16265	0.266931	-4.35563	1.32684e-05	0.000119987
AT4G09800	12337.5	-0.436603	0.195052	-2.23839	0.0251956	0.0592675
AT4G09830	3713.29	-0.964705	0.315285	-3.05979	0.00221492	0.00840216
AT4G10070	1152.39	-0.485948	0.198911	-2.44304	0.0145641	0.0382802
AT4G10180	2378.85	-0.850165	0.227875	-3.73083	0.000190849	0.00112482
AT4G10730	3005.89	-0.378894	0.128661	-2.9449	0.00323055	0.0114115
AT4G11120	1457.16	-0.687747	0.242156	-2.84011	0.00450985	0.0149418
AT4G11170	208.589	-3.89127	0.948515	-4.10249	4.08735e-05	0.000308964
AT4G11240	2139.54	-0.404578	0.118664	-3.40944	0.00065097	0.00307211
AT4G11330	1701.72	-1.45127	0.364826	-3.97799	6.95001e-05	0.000483132
AT4G11600	9082.32	-0.874974	0.294033	-2.97577	0.00292254	0.0105262
AT4G11670	1031.05	-0.745521	0.229321	-3.25099	0.00115003	0.00491921
AT4G11680	1161.81	-0.32191	0.132394	-2.43145	0.0150386	0.0392814
AT4G11800	2282.29	-0.527043	0.200485	-2.62884	0.00856778	0.0250589
AT4G11820	3269.71	0.47164	0.199924	2.35909	0.0183196	0.0459754
AT4G12070	909.226	-0.299816	0.1165	-2.57352	0.0100668	0.0286218
AT4G12240	182.305	-0.961157	0.25828	-3.72138	0.000198137	0.00115786
AT4G12250	766.485	-0.521581	0.217373	-2.39947	0.0164188	0.0421672
AT4G12290	616.836	-2.49492	0.405478	-6.15303	7.60158e-10	2.45066e-08
AT4G12300	828.087	-0.990283	0.154431	-6.41246	1.43189e-10	5.39102e-09
AT4G12310	1438.95	-0.353141	0.115667	-3.05307	0.00226512	0.0085498
AT4G12420	20767	-0.76462	0.22881	-3.34172	0.000832611	0.00377826
AT4G12460	3101.23	-1.08633	0.260305	-4.1733	3.00222e-05	0.000239564
AT4G12470	15656.1	-4.41842	0.588313	-7.51033	5.89806e-14	4.80798e-12
AT4G12480	24384.4	-4.28469	0.682732	-6.2758	3.47852e-10	1.1944e-08
AT4G12490	4400.37	-3.77017	0.705683	-5.34258	9.16317e-08	1.73335e-06
AT4G12560	3176.74	-0.764128	0.298387	-2.56086	0.0104413	0.0294378
AT4G12570	1790.45	-0.61645	0.187108	-3.29463	0.000985521	0.00434557
AT4G12730	5381	0.404151	0.124587	3.24392	0.00117897	0.00501649
AT4G12735	1041.05	-3.38058	0.680058	-4.97102	6.66022e-07	9.25975e-06
AT4G13020	3658.79	-0.448818	0.135187	-3.31999	0.000900201	0.00402692
AT4G13350	5969.72	-0.666819	0.198915	-3.35229	0.000801472	0.00366632
AT4G13540	330.834	-1.30513	0.415344	-3.1423	0.00167628	0.00669273
AT4G13550	3444.4	-0.715416	0.265775	-2.69181	0.00710655	0.0215248
AT4G13750	908.566	-1.17522	0.331919	-3.54068	0.000399095	0.00205645
AT4G13890	595.419	-2.91789	1.44176	-2.02384	0.0429865	0.0906026
AT4G14040	13881.5	-1.12458	0.303107	-3.71019	0.000207105	0.00120344
AT4G14070	5642.97	-0.773629	0.274678	-2.81649	0.00485509	0.0158401
AT4G14230	1699.65	-1.33106	0.162454	-8.19344	2.53858e-16	3.16095e-14
AT4G14365	1197.92	-1.3579	0.553732	-2.45227	0.0141956	0.0374856
AT4G14370	680.857	-2.05916	0.510693	-4.03209	5.5284e-05	0.000397224
AT4G14430	3346.09	-0.714198	0.347238	-2.0568	0.0397059	0.0850487
AT4G14580	402.402	-0.609344	0.220989	-2.75735	0.00582718	0.0182649
AT4G14850	245.446	-0.551557	0.197685	-2.79008	0.00526945	0.0168715
AT4G14900	3104.38	0.478434	0.182269	2.62487	0.00866808	0.0252944
AT4G14970	378.681	-1.06633	0.229776	-4.64074	3.47168e-06	3.87181e-05
AT4G15000	11918.9	0.232668	0.0906943	2.56541	0.0103053	0.0291252
AT4G15010	1237.85	-0.976363	0.154029	-6.33882	2.31528e-10	8.27585e-09
AT4G15030	1174.91	-0.691085	0.295067	-2.34213	0.0191739	0.047514
AT4G15090	1331.51	-0.524885	0.216373	-2.42584	0.015273	0.039811
AT4G15140	362.31	-1.26898	0.581437	-2.18249	0.0290734	0.0662971
AT4G15233	1006.01	-2.10835	0.510479	-4.13014	3.62549e-05	0.000280413
AT4G15260	2316.28	-2.14438	0.311979	-6.87349	6.26486e-12	3.24142e-10
AT4G15490	1563.51	-2.77223	0.377339	-7.34681	2.02997e-13	1.42867e-11
AT4G15530	22541.2	-1.75137	0.391647	-4.47181	7.75615e-06	7.7092e-05
AT4G15610	9236.61	-2.50384	0.435952	-5.74339	9.28005e-09	2.2909e-07
AT4G15660	534.257	-2.6737	1.00444	-2.66188	0.00777044	0.0231194
AT4G15670	649.625	-2.18085	0.958685	-2.27484	0.0229158	0.0549426
AT4G15700	1025.25	-2.05691	0.928338	-2.21569	0.0267129	0.0620507
AT4G15760	14605.4	-1.73901	0.362532	-4.79684	1.6119e-06	1.9983e-05
AT4G15780	3362.93	-1.01341	0.198903	-5.09499	3.48767e-07	5.31881e-06
AT4G15802	3134.44	0.353748	0.167274	2.11478	0.0344485	0.0759556
AT4G15810	539.451	-0.888547	0.347283	-2.55857	0.0105105	0.0295666
AT4G15850	435.78	-1.01621	0.253166	-4.01402	5.96931e-05	0.000423798
AT4G15900	4193.04	-0.565339	0.197807	-2.85803	0.00426281	0.0143329
AT4G15910	3410.91	-1.64528	0.437145	-3.76369	0.000167427	0.00101288
AT4G15975	115.027	-3.1682	0.664335	-4.76899	1.85155e-06	2.23429e-05
AT4G15990	120.126	-2.31801	0.726155	-3.19216	0.00141211	0.00582053
AT4G16008	431.958	-1.68305	0.627924	-2.68034	0.00735467	0.0220991
AT4G16110	1736.16	-0.523307	0.235282	-2.22417	0.0261368	0.0609894
AT4G16146	166.671	-1.82369	0.357442	-5.10207	3.35965e-07	5.14434e-06
AT4G16162	18.2073	-2.05909	0.869105	-2.36921	0.0178261	0.0449962
AT4G16180	3172.92	-0.671231	0.117359	-5.71945	1.06869e-08	2.60976e-07
AT4G16190	26216.1	-1.20706	0.249233	-4.84312	1.27818e-06	1.63836e-05
AT4G16250	1358.18	-1.02822	0.231405	-4.44336	8.85627e-06	8.5843e-05
AT4G16370	29607.9	-1.68213	0.31482	-5.34316	9.13391e-08	1.73071e-06
AT4G16390	3061.64	-0.718407	0.202797	-3.54249	0.000396372	0.00204398
AT4G16450	3916.61	0.471606	0.14436	3.26689	0.00108737	0.00469973
AT4G16563	5419	-2.01966	0.565014	-3.57452	0.000350871	0.00185176
AT4G16660	6875.2	-0.449375	0.189344	-2.37333	0.0176284	0.0446662
AT4G16670	1519.37	-1.63774	0.222565	-7.35851	1.85981e-13	1.34226e-11
AT4G16760	11226.3	-0.736929	0.287285	-2.56515	0.0103131	0.0291343
AT4G16765	1156.36	-0.47272	0.225581	-2.09556	0.0361211	0.0788003
AT4G16790	655.759	-0.486545	0.182096	-2.67191	0.00754204	0.0225545
AT4G16800	563.01	-0.279787	0.1347	-2.07711	0.0377914	0.0817512
AT4G16855	142.725	-6.60547	1.31525	-5.0222	5.10823e-07	7.45894e-06
AT4G17040	15147.9	-0.617491	0.276903	-2.22999	0.0257482	0.0602919
AT4G17070	1385	-0.730099	0.355908	-2.05137	0.0402312	0.085995
AT4G17080	2958.19	-0.70232	0.1538	-4.56645	4.96049e-06	5.23346e-05
AT4G17090	7563.72	-0.576245	0.256213	-2.24909	0.024507	0.0580269
AT4G17100	2362.76	0.418188	0.179453	2.33035	0.0197878	0.0487107
AT4G17140	5531.73	-0.972166	0.319628	-3.04155	0.00235364	0.00879008
AT4G17150	1532.53	-0.714258	0.238909	-2.98967	0.00279282	0.0101422
AT4G17240	775.908	-0.494677	0.202644	-2.44111	0.014642	0.0384405
AT4G17370	1848.58	-0.768488	0.246804	-3.11376	0.0018472	0.00723993
AT4G17486	1688.45	-0.513606	0.129579	-3.96366	7.38108e-05	0.000507494
AT4G17490	1270.8	-1.75492	0.650946	-2.69595	0.0070188	0.0212989
AT4G17730	3320.79	-0.764328	0.196294	-3.89379	9.86894e-05	0.000648637
AT4G17790	1249.82	0.496789	0.23412	2.12194	0.0338426	0.0749183
AT4G17840	7615.34	-0.879184	0.307508	-2.85906	0.00424903	0.0142951
AT4G17890	2051.23	0.357156	0.1565	2.28215	0.0224806	0.0540709
AT4G17895	761.302	-0.490802	0.163015	-3.01078	0.00260577	0.00958326
AT4G17900	3498.71	-0.747908	0.304187	-2.45871	0.0139438	0.0370021
AT4G18010	12234.3	-3.19313	0.480129	-6.65055	2.91997e-11	1.29446e-09
AT4G18100	12954.9	0.304198	0.109627	2.77485	0.00552269	0.0174993
AT4G18160	760.668	-0.373608	0.186894	-1.99903	0.0456048	0.0949729
AT4G18197	733.8	-1.04947	0.309848	-3.38705	0.000706485	0.00329245
AT4G18205	1887.22	-1.30257	0.338873	-3.84382	0.000121132	0.000768505
AT4G18210	756.502	-2.22048	0.455302	-4.87695	1.07739e-06	1.41787e-05
AT4G18230	1063.56	-0.6757	0.175002	-3.86111	0.000112875	0.000727525
AT4G18250	142.977	-2.04614	0.701146	-2.91828	0.00351963	0.0122259
AT4G18650	132.942	-1.6729	0.618942	-2.70284	0.00687495	0.0209184
AT4G18700	8054.91	0.386578	0.17543	2.2036	0.0275523	0.0634929
AT4G18710	13257.7	-0.509298	0.194761	-2.61499	0.00892294	0.0259179
AT4G18730	8758.7	0.389935	0.144876	2.69151	0.00711303	0.0215387
AT4G18810	8917.36	-0.790661	0.265868	-2.97388	0.00294057	0.0105709
AT4G18870	3.64909	-5.37393	2.34812	-2.28861	0.0221023	0.0534217
AT4G18880	1491.18	-1.57571	0.422147	-3.7326	0.00018951	0.0011184
AT4G18950	4136.29	-1.05298	0.384573	-2.73805	0.0061805	0.0192077
AT4G19090	174.83	-0.628731	0.263755	-2.38377	0.0171365	0.0436345
AT4G19140	1083.18	-1.01809	0.31299	-3.2528	0.00114275	0.00490283
AT4G19160	16804.1	-1.34495	0.266587	-5.04505	4.53407e-07	6.72454e-06
AT4G19200	7441.53	-0.534486	0.209977	-2.54545	0.0109138	0.0305192
AT4G19410	16647.2	-2.07016	0.344274	-6.01312	1.81987e-09	5.31467e-08
AT4G19420	14533.1	-1.1649	0.372825	-3.12452	0.00178096	0.00702112
AT4G19510	3508.86	-0.564813	0.247293	-2.28398	0.0223724	0.0538792
AT4G19520	3978.98	-1.03789	0.335041	-3.0978	0.00194961	0.00755507
AT4G19700	1491.46	-1.07988	0.26262	-4.11195	3.92334e-05	0.00029896
AT4G19880	7921.92	-1.06565	0.283785	-3.75512	0.000173259	0.00104148
AT4G20010	1614.9	-0.575486	0.184114	-3.12571	0.00177379	0.00700063
AT4G20030	642.711	-0.580003	0.206127	-2.81381	0.00489577	0.0159408
AT4G20260	27187.1	-0.816157	0.261137	-3.1254	0.00177566	0.00700558
AT4G20740	417.65	-1.45284	0.259658	-5.59519	2.20378e-08	4.90591e-07
AT4G20840	1050.78	-0.472161	0.233506	-2.02205	0.0431713	0.0908738
AT4G20850	21175.7	-0.616565	0.171513	-3.59485	0.00032458	0.00174139
AT4G20860	6524.86	-2.12662	0.444745	-4.78165	1.73865e-06	2.12291e-05
[truncated: 898 more rows]

## Sheet: Tab. S3d
Table S3d: differentially expressed genes (DEGs) detected as upregulated under Cd stress responses in A. thaliana root
	baseMean	log2FoldChange	lfcSE	stat	pvalue	padj
AT1G01060	4827.9	1.12313	0.258302	4.3481	1.37321e-05	0.000123687
AT1G01120	3460.6	1.1716	0.285675	4.10115	4.11106e-05	0.000310343
AT1G01190	155.293	1.79848	0.265339	6.77804	1.21814e-11	5.92395e-10
AT1G01225	91.2877	2.0887	0.622257	3.35665	0.000788943	0.00361924
AT1G01380	49.5395	2.11337	0.859716	2.45821	0.013963	0.037018
AT1G01453	140.773	3.21722	0.83344	3.86017	0.000113308	0.000729902
AT1G01580	3885.08	3.26535	0.428718	7.61655	2.60554e-14	2.27103e-12
AT1G01610	3360.13	1.17736	0.227557	5.1739	2.29263e-07	3.72709e-06
AT1G01620	29354.3	1.08881	0.391464	2.78139	0.00541267	0.0172229
AT1G01660	136.086	1.74454	0.607432	2.87199	0.00407899	0.0138173
AT1G01750	623.741	2.2673	0.608533	3.72585	0.000194656	0.00114164
AT1G01830	776.864	0.58439	0.213787	2.73352	0.00626611	0.0194046
AT1G01900	293.266	2.81171	0.769634	3.6533	0.000258887	0.00145364
AT1G02205	2053.09	3.37118	0.434137	7.76524	8.14888e-15	7.3868e-13
AT1G02310	125.829	0.862673	0.389906	2.21251	0.0269312	0.0624556
AT1G02335	313.628	2.33803	0.704972	3.31648	0.00091159	0.00406686
AT1G02340	763.397	1.6197	0.429614	3.77013	0.000163165	0.000992391
AT1G02380	699.375	1.0514	0.300454	3.49938	0.000466341	0.00233191
AT1G02420	365.886	1.06892	0.539653	1.98075	0.0476195	0.098409
AT1G02460	66.3219	1.67541	0.518656	3.23029	0.00123666	0.00520914
AT1G02570	102.674	3.3514	1.07211	3.12599	0.00177205	0.00699863
AT1G02575	12.708	3.22352	1.48767	2.16683	0.0302478	0.068534
AT1G02730	1237.06	1.85029	0.682167	2.71237	0.00668032	0.0204359
AT1G02810	164.874	2.8767	0.742701	3.87329	0.000107374	0.000697661
AT1G02900	928.981	1.35391	0.35966	3.76442	0.000166934	0.00101097
AT1G02950	201.995	1.24054	0.38998	3.18104	0.00146748	0.00600291
AT1G03130	40928.3	2.36549	0.40961	5.77499	7.69562e-09	1.93776e-07
AT1G03630	8894.73	1.47154	0.310198	4.74389	2.09657e-06	2.50066e-05
AT1G03700	86.3776	1.84081	0.593274	3.10279	0.00191705	0.00746735
AT1G03820	347.132	2.30171	0.766364	3.00341	0.00266973	0.00977406
AT1G03840	108.782	1.25142	0.333487	3.75252	0.000175063	0.00104954
AT1G03870	9809.03	0.904353	0.293719	3.07897	0.00207719	0.00796283
AT1G03920	161.391	1.85367	0.911314	2.03406	0.0419452	0.0889305
AT1G04020	349.184	1.10463	0.406513	2.71734	0.00658087	0.0202026
AT1G04030	206.035	0.985617	0.324304	3.03918	0.00237226	0.00884504
AT1G04040	5859.57	1.75108	0.534855	3.27394	0.00106059	0.00460265
AT1G04050	228.781	1.00787	0.351156	2.87016	0.00410262	0.0138808
AT1G04160	755.817	1.04949	0.420423	2.49627	0.0125508	0.0340852
AT1G04180	379.78	2.58512	1.04258	2.47954	0.0131552	0.0353309
AT1G04220	1118.38	1.92596	0.407943	4.72116	2.34505e-06	2.75069e-05
AT1G04250	2672.57	1.53016	0.262733	5.82401	5.74507e-09	1.47279e-07
AT1G04360	332.737	0.563211	0.223821	2.51635	0.0118579	0.032612
AT1G04520	682.835	1.00104	0.403215	2.48264	0.0130414	0.0351086
AT1G04550	999.328	0.610106	0.242219	2.51882	0.011775	0.0324312
AT1G04610	22.8874	2.52268	1.20205	2.09866	0.0358473	0.078351
AT1G04680	2753.86	2.85375	0.474184	6.01823	1.76337e-09	5.17637e-08
AT1G04700	193.931	1.53264	0.619277	2.47489	0.0133276	0.0357178
AT1G04760	58.3941	1.12437	0.552059	2.03668	0.0416823	0.0884461
AT1G04820	13452.2	1.04361	0.351684	2.96747	0.00300259	0.0107557
AT1G05170	478.931	0.785883	0.209008	3.76006	0.000169871	0.00102438
AT1G05210	225.357	1.23227	0.381924	3.22647	0.00125326	0.00527317
AT1G05250	2425.14	2.85314	0.710694	4.01459	5.95498e-05	0.000423311
AT1G05260	2463.93	2.13968	0.627134	3.41185	0.000645244	0.00305272
AT1G05310	169.711	2.66971	0.603882	4.4209	9.82885e-06	9.34038e-05
AT1G05370	75.8848	1.36467	0.318826	4.2803	1.86643e-05	0.000159886
AT1G05440	46.7642	1.68514	0.731516	2.30363	0.0212435	0.0516435
AT1G05540	97.24	3.86057	0.804252	4.8002	1.58507e-06	1.97367e-05
AT1G05630	1192.75	1.68362	0.407528	4.1313	3.60711e-05	0.000279372
AT1G05640	98.9808	0.904232	0.31708	2.85175	0.00434795	0.0145372
AT1G05850	26785.7	0.554193	0.217469	2.54838	0.0108225	0.030303
AT1G05870	1215.68	1.03835	0.24459	4.24527	2.18326e-05	0.000182707
AT1G05990	50.3442	2.47042	1.13538	2.17586	0.0295661	0.0672447
AT1G06000	955.267	1.89536	0.350792	5.40307	6.55104e-08	1.28204e-06
AT1G06080	508.489	4.80761	0.960487	5.00539	5.57495e-07	8.01647e-06
AT1G06420	47.5317	2.52613	1.0495	2.40699	0.0160848	0.0414975
AT1G06490	263.574	0.940843	0.430257	2.1867	0.0287643	0.0657246
AT1G06550	3376.65	0.979111	0.273073	3.58553	0.000336395	0.00178953
AT1G06680	158494	1.4477	0.379025	3.81954	0.000133701	0.00084165
AT1G06760	5151.08	0.604743	0.270875	2.23256	0.0255782	0.0600428
AT1G06830	229.623	1.65949	0.309774	5.35712	8.45612e-08	1.61852e-06
AT1G06923	67.8337	2.36269	0.993858	2.3773	0.0174401	0.0442981
AT1G06980	60.2334	1.73318	0.680735	2.54604	0.0108953	0.0304825
AT1G07070	841.262	0.868263	0.179058	4.84906	1.24049e-06	1.59262e-05
AT1G07260	354.035	1.14604	0.335713	3.41374	0.000640775	0.00303792
AT1G07370	416.014	0.995125	0.432729	2.29965	0.021468	0.0520999
AT1G07410	161.628	0.646132	0.303576	2.1284	0.033304	0.0740371
AT1G07500	304.637	1.55298	0.757665	2.04969	0.0403946	0.0863118
AT1G07560	60.4856	2.02844	0.556279	3.64644	0.000265895	0.00148343
AT1G07750	2144.31	0.567025	0.23743	2.38817	0.0169323	0.04321
AT1G07790	1142.51	0.949223	0.214718	4.42079	9.83415e-06	9.34038e-05
AT1G07795	13.2401	2.80384	1.40218	1.99964	0.0455395	0.0948832
AT1G07820	2839.28	0.735175	0.155923	4.71499	2.41717e-06	2.8207e-05
AT1G07880	223.576	1.8138	0.572396	3.16879	0.00153077	0.00621245
AT1G07890	22246.4	1.60236	0.281119	5.69993	1.19854e-08	2.89565e-07
AT1G08160	196.599	1.72713	0.326374	5.29187	1.21069e-07	2.18445e-06
AT1G08250	95.5408	10.001	1.23266	8.11337	4.92338e-16	5.75122e-14
AT1G08320	1362.4	0.733471	0.173107	4.2371	2.26425e-05	0.00018851
AT1G08340	406.338	2.11679	0.613002	3.45315	0.000554076	0.00269915
AT1G08380	112063	1.93903	0.41963	4.62081	3.82254e-06	4.20516e-05
AT1G08430	150.859	2.41937	0.945534	2.55873	0.0105054	0.0295596
AT1G08470	1090.08	0.750171	0.14961	5.01419	5.32585e-07	7.72692e-06
AT1G08590	770.758	0.813848	0.292535	2.78206	0.00540158	0.0171925
AT1G08650	1330.32	1.54425	0.251156	6.14857	7.81824e-10	2.5025e-08
AT1G08670	169.16	1.90695	0.4331	4.40303	1.06751e-05	9.9832e-05
AT1G08990	643.239	1.8186	0.393097	4.62633	3.72201e-06	4.12259e-05
AT1G09090	555.666	1.75425	0.604988	2.89965	0.00373585	0.0128367
AT1G09155	52.9212	1.95204	0.836636	2.3332	0.0196376	0.0484042
AT1G09170	277.157	2.20982	0.715981	3.08642	0.00202583	0.00781037
AT1G09200	1914.42	1.42954	0.274019	5.21695	1.81891e-07	3.07124e-06
AT1G09250	1051.07	1.7753	0.461699	3.84515	0.000120477	0.000765631
AT1G09310	20119.2	0.991695	0.341608	2.90302	0.00369582	0.0127287
AT1G09340	61320.4	0.955724	0.30642	3.119	0.00181467	0.00713215
AT1G09350	79.3789	2.41924	1.10389	2.19155	0.0284117	0.06505
AT1G09440	599.338	0.630653	0.29653	2.12678	0.0334387	0.0742203
AT1G09450	101.734	1.23642	0.611363	2.02239	0.0431358	0.090816
AT1G09540	59.5321	1.99886	0.884931	2.25877	0.0238975	0.056911
AT1G09560	19541.9	1.02726	0.181014	5.67504	1.38653e-08	3.28678e-07
AT1G09750	3695.26	2.76885	0.595323	4.65101	3.30307e-06	3.713e-05
AT1G10030	908.136	0.615165	0.21552	2.85433	0.00431282	0.0144603
AT1G10040	342.293	1.81787	0.673168	2.70047	0.00692412	0.0210341
AT1G10120	1497.63	0.676958	0.0908588	7.45066	9.28736e-14	7.20788e-12
AT1G10360	1785.82	1.57109	0.4257	3.6906	0.00022373	0.00128359
AT1G10385	23.4471	3.32994	1.22089	2.72747	0.00638222	0.0196781
AT1G10460	41.1416	1.92807	0.921956	2.09128	0.0365032	0.0794807
AT1G10480	109.672	0.908158	0.40437	2.24586	0.024713	0.0584111
AT1G10560	122.873	2.70912	0.561154	4.82776	1.38077e-06	1.75398e-05
AT1G10630	3196.83	0.768118	0.203055	3.7828	0.000155072	0.000953403
AT1G10640	281.993	2.86932	0.845837	3.39228	0.000693138	0.00324275
AT1G10670	11131.5	0.606976	0.178755	3.39558	0.000684839	0.00320657
AT1G10750	112.484	1.32701	0.50224	2.64218	0.00823742	0.0242311
AT1G10780	184.552	1.05376	0.444958	2.36822	0.017874	0.045097
AT1G10790	22.9361	1.50408	0.725498	2.07317	0.0381567	0.0823687
AT1G10800	19.7732	1.46442	0.723334	2.02455	0.042914	0.0904836
AT1G11000	480.619	1.03469	0.371838	2.78263	0.00539206	0.017167
AT1G11080	283.822	2.47426	0.372857	6.63594	3.22451e-11	1.41678e-09
AT1G11130	784.554	1.25789	0.369809	3.40147	0.000670254	0.00314978
AT1G11160	163.107	2.03787	0.671482	3.03488	0.00240629	0.00894543
AT1G11220	66.3055	1.96459	0.783621	2.50706	0.0121739	0.0332792
AT1G11350	2041.73	0.5544	0.245669	2.25669	0.0240274	0.0571723
AT1G11420	120.92	1.10262	0.427231	2.58085	0.00985588	0.0280948
AT1G11545	755.249	1.45502	0.618093	2.35405	0.0185702	0.0464317
AT1G11670	887.073	1.15728	0.518539	2.23181	0.0256277	0.0601341
AT1G11690	4.75093	4.32946	1.9492	2.22115	0.026341	0.0613631
AT1G11700	382.697	1.92161	0.261485	7.34882	1.99971e-13	1.41617e-11
AT1G11730	62.8648	1.72754	0.794775	2.17362	0.0297339	0.0675568
AT1G11860	68890.6	1.15291	0.32885	3.50588	0.0004551	0.00228738
AT1G11915	24.0788	1.35527	0.530333	2.55551	0.0106032	0.0297757
AT1G11920	22.6785	2.28194	1.13777	2.00564	0.0448952	0.0938228
AT1G12000	4179.04	0.753933	0.220502	3.41917	0.000628128	0.00298921
AT1G12040	2101.36	2.69567	0.676558	3.9844	6.7652e-05	0.000471732
AT1G12110	4326.01	1.98656	0.32741	6.06749	1.29925e-09	3.9363e-08
AT1G12330	865.056	1.28582	0.421055	3.0538	0.00225965	0.00853755
AT1G12380	274.875	2.21292	0.472491	4.68353	2.81978e-06	3.22086e-05
AT1G12420	450.443	0.790181	0.299938	2.63448	0.00842658	0.0246978
AT1G12430	1357.63	0.553679	0.227112	2.43792	0.0147722	0.0387373
AT1G12500	2168.3	0.640299	0.272384	2.35072	0.0187371	0.0467233
AT1G12560	985.397	2.53681	0.682354	3.71773	0.000201018	0.00117107
AT1G12820	2486.46	0.634092	0.174688	3.62986	0.000283575	0.00156166
AT1G12900	114306	0.65756	0.293998	2.23661	0.0253117	0.059516
AT1G12950	537.006	2.49102	0.529684	4.70284	2.56562e-06	2.9725e-05
AT1G13080	1508.78	1.12826	0.250231	4.50889	6.51683e-06	6.65245e-05
AT1G13110	4256.86	0.678224	0.191454	3.54248	0.000396382	0.00204398
AT1G13250	865.866	0.706259	0.353552	1.99761	0.0457587	0.095206
AT1G13420	669.376	2.38937	1.08829	2.19554	0.0281252	0.0645507
AT1G13600	105.565	2.08431	0.422436	4.93402	8.05534e-07	1.0997e-05
AT1G13635	45.7291	2.84651	1.18102	2.41021	0.0159434	0.0412453
AT1G13830	184.156	0.953046	0.438829	2.17179	0.0298713	0.0678299
AT1G14120	830.058	0.897958	0.413697	2.17057	0.0299637	0.067999
AT1G14185	243.779	2.29348	0.829066	2.76634	0.00566889	0.0178776
AT1G14220	84.8714	2.06152	0.682716	3.01959	0.0025312	0.0093515
AT1G14280	3709.16	1.30706	0.4562	2.86511	0.00416867	0.0140832
AT1G14430	179.57	1.161	0.450406	2.57766	0.00994713	0.0283193
AT1G14700	1015.42	1.47885	0.187805	7.87438	3.42441e-15	3.31641e-13
AT1G14730	395.239	1.20736	0.292561	4.12689	3.6771e-05	0.000283437
AT1G14750	38.7174	1.94341	0.804602	2.41536	0.0157196	0.0407968
AT1G15100	842.14	0.815022	0.204191	3.99146	6.56665e-05	0.000460725
AT1G15210	1572.31	1.67189	0.531701	3.14441	0.0016642	0.00664915
AT1G15460	155.188	2.87591	0.896565	3.2077	0.001338	0.00556769
AT1G15550	956.753	1.29059	0.446348	2.89144	0.00383477	0.0131274
AT1G15570	502.921	1.4852	0.463481	3.20443	0.00135329	0.00562307
AT1G15760	50.3059	2.60082	1.16054	2.24105	0.025023	0.0589614
AT1G15820	162759	2.46144	0.476641	5.16414	2.41553e-07	3.88784e-06
AT1G15830	3046.32	1.5687	0.730148	2.14846	0.0316769	0.0710895
AT1G15970	780.571	0.533783	0.19055	2.80127	0.00509012	0.0164273
AT1G16060	356.459	1.76711	0.469936	3.76033	0.00016969	0.00102383
AT1G16220	211.761	1.07074	0.37051	2.88991	0.00385349	0.0131796
AT1G16230	5.99829	2.4639	1.21534	2.02734	0.0426282	0.090082
AT1G16300	533.104	0.627767	0.194102	3.23421	0.00121981	0.00515721
AT1G16390	558.54	0.906346	0.273386	3.31526	0.00091558	0.00407961
AT1G16400	548.231	1.15104	0.517954	2.22228	0.0262645	0.0612171
AT1G16410	1852.33	2.4713	0.877607	2.81595	0.00486328	0.0158501
AT1G16440	133.78	2.84758	0.837169	3.40144	0.000670326	0.00314978
AT1G16500	245.857	1.05025	0.227127	4.62407	3.76283e-06	4.15967e-05
AT1G16530	73.9562	1.36087	0.514517	2.64494	0.00817051	0.0240906
AT1G16705	14.403	3.40351	1.06291	3.20207	0.00136445	0.00565729
AT1G16850	151.418	1.64574	0.720711	2.28349	0.0224014	0.0539377
AT1G16860	1984.76	0.645453	0.265555	2.43058	0.0150749	0.0393669
AT1G16920	1571.55	0.533758	0.258712	2.06313	0.0391001	0.0840212
AT1G17140	1536.43	1.44482	0.413809	3.49152	0.000480284	0.00238743
AT1G17190	804.79	1.20729	0.569174	2.12113	0.0339107	0.0750326
AT1G17200	2018.87	0.728602	0.296236	2.45953	0.0139119	0.036943
AT1G17430	271.656	1.97377	0.449642	4.38964	1.13537e-05	0.000105105
AT1G17700	52.4916	2.0203	0.951415	2.12347	0.0337149	0.0747306
AT1G17710	182.583	4.01665	0.855123	4.69716	2.63807e-06	3.03781e-05
AT1G17750	120.425	0.836155	0.40983	2.04025	0.0413256	0.0878207
AT1G18100	207.724	2.08748	0.451697	4.62141	3.81141e-06	4.20108e-05
AT1G18140	224.226	2.78167	0.799727	3.47827	0.000504656	0.00249053
AT1G18180	249.33	0.78555	0.397889	1.97429	0.0483484	0.0996393
AT1G18250	473.763	2.71781	0.61708	4.40431	1.06123e-05	9.94607e-05
AT1G18370	487.062	1.52747	0.683101	2.23608	0.0253462	0.0595723
AT1G18420	514.505	1.07937	0.300751	3.58891	0.00033206	0.00177229
AT1G18550	215.229	0.990349	0.436953	2.26649	0.0234213	0.0560124
AT1G18590	819.293	1.1635	0.472008	2.46501	0.0137009	0.0365243
AT1G18620	5882.41	0.757102	0.343164	2.20624	0.0273671	0.0631818
AT1G18670	1284.57	0.721912	0.234582	3.07744	0.00208789	0.00800063
AT1G18870	1255.4	3.02313	0.592786	5.09987	3.39882e-07	5.19029e-06
AT1G18880	745.71	0.648674	0.206546	3.14058	0.00168613	0.00672257
AT1G19000	11910.8	0.7593	0.162071	4.68497	2.79995e-06	3.20744e-05
AT1G19190	105.453	0.87602	0.29875	2.93229	0.00336474	0.0117745
AT1G19230	969.59	1.44614	0.434358	3.32938	0.000870383	0.00391828
AT1G19300	276.654	0.949296	0.271656	3.49448	0.000474981	0.00236529
AT1G19330	565.418	1.89473	0.441005	4.29639	1.73606e-05	0.000150853
AT1G19350	7211.84	1.04961	0.305744	3.43298	0.000596995	0.0028627
AT1G19840	107.928	1.92264	0.611908	3.14203	0.00167778	0.00669635
AT1G19850	1142.55	0.686636	0.215683	3.18354	0.00145486	0.00596633
AT1G19940	296.543	3.08399	0.600095	5.13917	2.75962e-07	4.36112e-06
AT1G19950	337.338	1.91425	0.411721	4.64938	3.32941e-06	3.7389e-05
AT1G19960	402.883	3.0782	0.33751	9.12033	7.48953e-20	1.34705e-17
AT1G19970	265.719	2.07483	0.424063	4.89273	9.94455e-07	1.32256e-05
AT1G20070	424.206	1.17427	0.414326	2.83417	0.00459455	0.0151516
AT1G20160	904.477	1.00037	0.323886	3.08865	0.00201067	0.00775985
AT1G20190	1155.29	1.40213	0.584454	2.39905	0.0164378	0.0421967
AT1G20340	119810	1.22833	0.350267	3.50685	0.000453439	0.00228251
AT1G20450	6680.97	1.65042	0.18884	8.7398	2.33533e-18	3.72698e-16
AT1G20610	292.72	1.15209	0.558359	2.06335	0.0390796	0.0840088
AT1G20640	1243.75	1.20826	0.243573	4.96056	7.02898e-07	9.70103e-06
AT1G20823	195.73	1.27508	0.289364	4.40649	1.05057e-05	9.8543e-05
AT1G20850	1339.3	2.33461	0.684292	3.41171	0.000645573	0.003053
AT1G20860	7.16901	3.14954	1.55059	2.03119	0.0422361	0.0894035
AT1G20930	300.129	1.3463	0.476555	2.82507	0.00472704	0.0154917
AT1G21070	432.255	0.652345	0.301812	2.16143	0.0306625	0.0692518
AT1G21090	194.847	1.31076	0.429855	3.04931	0.00229369	0.00862017
AT1G21140	96.4185	4.62172	1.40906	3.28001	0.00103804	0.00453607
AT1G21150	70.0106	1.7555	0.468856	3.74422	0.000180954	0.00107802
AT1G21270	2399.89	0.933962	0.230826	4.04617	5.20628e-05	0.000378795
AT1G21440	2122.16	1.91052	0.348237	5.48626	4.1053e-08	8.47306e-07
AT1G21500	5574.82	1.90967	0.480977	3.9704	7.17516e-05	0.000494837
AT1G21810	90.7133	1.95076	0.699923	2.7871	0.00531821	0.0169885
AT1G22160	366.656	2.64989	0.521223	5.08399	3.69593e-07	5.59874e-06
AT1G22170	498.591	1.87676	0.453499	4.13841	3.49728e-05	0.000272169
AT1G22220	84.613	1.54805	0.622212	2.48799	0.0128468	0.0346848
AT1G22290	24.4527	3.09665	0.901652	3.43442	0.000593828	0.00285234
AT1G22330	1052.51	0.975523	0.374458	2.60516	0.00918313	0.0265173
AT1G22440	1541.51	1.06226	0.442018	2.4032	0.0162525	0.0418253
AT1G22640	1295.37	0.530653	0.216928	2.44622	0.0144364	0.0380152
AT1G22650	344.005	2.10566	0.416204	5.0592	4.21027e-07	6.31876e-06
AT1G22710	6180.08	1.46076	0.231345	6.31422	2.71526e-10	9.53273e-09
AT1G22910	1720.18	0.561872	0.187011	3.00449	0.00266029	0.00974263
AT1G23110	151.325	5.64221	0.75744	7.44905	9.40138e-14	7.24674e-12
AT1G23130	11706.9	0.690367	0.143276	4.81844	1.44688e-06	1.82771e-05
AT1G23140	430.581	1.43796	0.40155	3.58102	0.000342258	0.00181731
AT1G23200	156.343	2.26653	0.480272	4.71927	2.36695e-06	2.76779e-05
AT1G23330	1003.66	0.548855	0.187802	2.92252	0.00347207	0.0120792
AT1G23340	180.94	1.95892	0.77204	2.53733	0.0111701	0.0310665
AT1G23460	439.629	1.213	0.366928	3.30582	0.000947003	0.00420144
AT1G23540	41.7125	1.9061	0.853011	2.23456	0.0254464	0.0597582
AT1G23720	12588	2.17428	0.635396	3.42193	0.000621776	0.00296482
AT1G23750	541.692	1.01166	0.219373	4.61157	3.9963e-06	4.34253e-05
AT1G24020	2245.22	1.97006	0.633351	3.11054	0.00186746	0.00730677
AT1G24100	2290.12	0.784789	0.261744	2.99831	0.00271482	0.00991672
AT1G24120	1413.29	0.534595	0.182382	2.93118	0.00337679	0.0118102
AT1G24420	28.3483	1.55141	0.718128	2.16036	0.0307451	0.069397
AT1G24620	39.9153	2.05289	0.897283	2.28789	0.0221437	0.0535104
AT1G24764	1375.43	0.542625	0.256524	2.1153	0.0344048	0.0758772
AT1G25230	2138.33	0.606805	0.251729	2.41055	0.0159286	0.041227
AT1G25440	7187.44	2.3331	0.493261	4.72996	2.24569e-06	2.64786e-05
AT1G25450	1824.19	0.935092	0.271209	3.44787	0.000565028	0.00274226
AT1G25480	647.203	0.678367	0.311742	2.17606	0.029551	0.067224
AT1G25510	255.825	2.15853	0.47024	4.59027	4.42665e-06	4.74104e-05
AT1G25530	588.715	1.28069	0.337043	3.79977	0.000144828	0.000897729
AT1G26300	857.528	0.505689	0.17675	2.86103	0.00422262	0.0142273
AT1G26360	71.4483	3.40687	1.49511	2.27867	0.0226869	0.0544631
AT1G26540	116.148	1.40934	0.437285	3.22294	0.00126882	0.00531694
AT1G26560	821.833	1.74139	0.335992	5.18285	2.1852e-07	3.58848e-06
AT1G26570	298.208	0.879563	0.329167	2.67209	0.00753807	0.0225545
AT1G26680	34.572	1.78755	0.554319	3.22478	0.00126071	0.00529468
AT1G26820	293.267	2.28391	0.61087	3.73878	0.000184916	0.00109644
AT1G26880	5185.82	0.604521	0.195731	3.08853	0.00201149	0.00776035
AT1G26970	104.744	1.68517	0.602705	2.79601	0.00517376	0.0166309
AT1G27030	1692.81	0.973821	0.362842	2.68387	0.00727751	0.0219196
AT1G27120	748.436	1.26777	0.405303	3.12796	0.00176026	0.00696433
AT1G27130	2749.17	1.49039	0.30581	4.8736	1.09584e-06	1.43715e-05
AT1G27140	168.021	2.5716	0.839533	3.06312	0.00219039	0.00832584
AT1G27210	1859.34	1.75516	0.438114	4.00617	6.17122e-05	0.00043622
AT1G27380	42.0395	2.96535	0.97716	3.03466	0.00240808	0.00894916
AT1G27500	431.148	0.617475	0.250704	2.46296	0.0137795	0.0366687
AT1G27670	122.206	0.609791	0.300976	2.02604	0.0427603	0.0902371
AT1G27740	177.895	1.43019	0.5766	2.48038	0.0131241	0.0352642
AT1G27950	4851.22	0.913901	0.218017	4.19188	2.76648e-05	0.000223269
AT1G28110	872.373	0.999852	0.212799	4.69859	2.61969e-06	3.02278e-05
AT1G28130	1885.21	0.79366	0.27968	2.83774	0.00454337	0.0150117
AT1G28170	13.4216	2.39397	0.799073	2.99593	0.00273612	0.00998166
AT1G28400	3416.98	1.83059	0.431658	4.24082	2.22703e-05	0.000185958
AT1G28590	51.7616	5.857	1.37271	4.26675	1.98345e-05	0.000168474
AT1G28670	1527.71	0.654171	0.216289	3.02452	0.00249027	0.00922132
AT1G28680	2327.02	1.07456	0.201829	5.32411	1.01448e-07	1.88135e-06
AT1G29000	76.4487	1.38904	0.619796	2.24113	0.0250179	0.0589614
AT1G29020	94.3809	2.16292	0.514936	4.20037	2.66475e-05	0.000215828
AT1G29070	16906.7	0.626335	0.317256	1.97423	0.0483556	0.0996393
AT1G29230	37.5641	2.19625	0.935272	2.34825	0.0188618	0.0469411
AT1G29280	1381.05	0.55147	0.247337	2.22963	0.0257723	0.0603198
AT1G29390	1941.62	1.35024	0.21693	6.2243	4.83725e-10	1.61208e-08
AT1G29600	191.905	1.45041	0.730063	1.9867	0.0469562	0.0972332
AT1G29910	227217	2.43055	0.602116	4.03668	5.42126e-05	0.000390965
AT1G29930	561470	1.51007	0.446624	3.38107	0.000722046	0.0033517
AT1G30050	30.4184	2.98031	1.09025	2.73362	0.00626432	0.0194043
AT1G30140	8.87736	2.43899	1.06692	2.28601	0.0222537	0.0536619
AT1G30280	139.709	2.35164	1.00192	2.34713	0.0189186	0.0470383
AT1G30380	62583.8	1.85198	0.387421	4.78027	1.75062e-06	2.13293e-05
AT1G30440	4252.2	0.628351	0.230966	2.72053	0.0065177	0.0200358
AT1G30510	3818.75	2.20244	0.441604	4.98736	6.12101e-07	8.65882e-06
AT1G30515	32.0008	2.2667	1.06438	2.12959	0.0332055	0.0739157
AT1G30530	1192.55	2.03027	0.326131	6.22532	4.80566e-10	1.60628e-08
AT1G30560	174.589	5.65817	0.854819	6.61914	3.61302e-11	1.55476e-09
AT1G30650	768.79	0.984454	0.286359	3.43783	0.000586391	0.00282088
AT1G30690	5552.14	1.10254	0.171313	6.43579	1.22834e-10	4.76654e-09
AT1G30750	593.668	1.62983	0.464713	3.50716	0.000452913	0.00228087
AT1G30840	169.669	1.68373	0.461006	3.6523	0.000259897	0.00145764
AT1G30850	63.8378	1.87497	0.594423	3.15427	0.00160901	0.00646284
AT1G30870	1679.87	2.86843	0.680521	4.21506	2.49717e-05	0.000204005
AT1G30990	99.9584	1.4505	0.517259	2.80421	0.00504397	0.0163015
AT1G31070	1126.74	0.664647	0.323648	2.05361	0.0400136	0.0856366
AT1G31230	2742.57	0.994013	0.275112	3.61313	0.000302528	0.00164568
AT1G31320	146.736	1.97532	0.589832	3.34895	0.000811176	0.00369728
AT1G31330	103866	2.19919	0.465838	4.72093	2.3477e-06	2.75096e-05
AT1G31335	147.327	2.202	0.52788	4.17141	3.02725e-05	0.000241222
AT1G31720	33.3393	2.17385	0.770822	2.82017	0.00479987	0.0156962
AT1G31750	78.1448	1.77539	0.434126	4.08956	4.32187e-05	0.000322603
AT1G31760	134.637	0.603289	0.304007	1.98446	0.047205	0.0976771
AT1G31770	1303.87	0.794081	0.326997	2.4284	0.0151655	0.0395671
AT1G31880	251.362	1.85083	0.703829	2.62966	0.00854693	0.0250117
AT1G31920	254.5	11.4157	1.43811	7.938	2.05474e-15	2.0975e-13
AT1G31950	338.782	1.35227	0.392461	3.44563	0.000569728	0.00275762
AT1G32080	18739.6	1.22225	0.343268	3.56064	0.000369955	0.00193803
AT1G32100	456.907	2.20935	0.707554	3.12252	0.00179311	0.00706048
AT1G32120	341.799	0.903074	0.358452	2.51937	0.0117564	0.0324038
AT1G32190	313.93	0.929051	0.469979	1.97679	0.0480652	0.0991672
AT1G32450	2231.44	2.80006	0.246604	11.3545	7.04566e-30	8.87049e-27
AT1G32540	332.273	1.96302	0.277998	7.0613	1.6495e-12	9.68421e-11
AT1G32740	139.225	1.26396	0.264006	4.7876	1.68784e-06	2.07879e-05
AT1G32900	7839.49	2.27155	0.182281	12.4618	1.20601e-35	2.73305e-32
AT1G33170	823.379	2.8162	0.72212	3.89991	9.62286e-05	0.000636525
AT1G33240	7308.9	1.182	0.317745	3.71997	0.000199247	0.00116195
AT1G33340	105.77	0.96347	0.473998	2.03265	0.0420883	0.089174
AT1G33440	70.0921	2.23584	0.588164	3.80139	0.000143886	0.000892374
AT1G33700	1168.01	1.38492	0.217938	6.35466	2.08886e-10	7.58616e-09
AT1G33750	171.435	1.61527	0.46484	3.47488	0.000511074	0.00251672
AT1G33800	905.02	1.74093	0.417995	4.16496	3.11411e-05	0.0002471
AT1G33890	17.8531	2.65907	0.816898	3.25509	0.00113357	0.00486902
AT1G34355	192.072	1.47814	0.691724	2.1369	0.0326063	0.0728434
AT1G34520	120.121	5.27449	1.60095	3.2946	0.000985624	0.00434557
AT1G42970	137813	0.785147	0.280331	2.80078	0.00509791	0.0164477
AT1G43020	161.419	1.58059	0.659963	2.39497	0.0166218	0.0425569
AT1G43790	289.914	1.96391	0.71622	2.74204	0.00610583	0.0190226
AT1G44030	11.0883	6.8974	3.18805	2.16352	0.0305016	0.0689847
AT1G44110	243.584	1.59204	0.710847	2.23965	0.025114	0.0591245
AT1G44575	84705.2	1.05326	0.290627	3.6241	0.000289975	0.00158993
AT1G44800	2918.06	1.52146	0.295587	5.14724	2.64351e-07	4.20697e-06
AT1G44900	747.95	0.716902	0.309196	2.3186	0.0204166	0.0499963
AT1G44970	507.29	1.85412	0.426922	4.34299	1.40554e-05	0.000126011
AT1G45130	2145.6	1.52533	0.39279	3.88333	0.000103035	0.000674073
AT1G45201	3924.15	2.48222	0.64915	3.8238	0.00013141	0.000828606
AT1G46480	204.771	1.45707	0.488722	2.98139	0.00286942	0.010381
AT1G47480	484.279	1.00234	0.298103	3.36239	0.000772712	0.00355485
AT1G47610	36.6584	2.15189	0.996204	2.16009	0.030766	0.0694302
AT1G47655	99.0697	1.47689	0.557103	2.65102	0.00802485	0.0237476
AT1G47840	195.344	0.809734	0.35809	2.26126	0.0237434	0.0566504
AT1G47900	1378.05	0.788948	0.271642	2.90436	0.00367999	0.0126896
AT1G47960	555.691	0.77705	0.252927	3.07224	0.00212462	0.00811394
AT1G48100	163.943	1.3333	0.293269	4.54634	5.4586e-06	5.68487e-05
AT1G48280	274.191	1.25323	0.370799	3.3798	0.000725382	0.00336443
AT1G48330	97.3906	1.9962	0.522367	3.82145	0.000132671	0.000836094
AT1G48470	28.9474	3.01306	1.07741	2.79659	0.00516452	0.0166153
AT1G48480	2420.14	1.85814	0.488736	3.80194	0.000143569	0.000890896
AT1G48600	10063.4	2.17669	0.27694	7.85977	3.84844e-15	3.66443e-13
AT1G48640	51.3188	2.11644	0.893234	2.36942	0.0178162	0.0449812
AT1G48800	31.4635	7.10758	2.32931	3.05136	0.00227806	0.00857849
AT1G48820	89.6102	5.45979	1.5936	3.42608	0.000612359	0.00292646
AT1G48830	6296.18	0.541684	0.129927	4.16915	3.05743e-05	0.000243284
AT1G48870	67.6979	0.965468	0.459728	2.10009	0.0357213	0.078214
AT1G48930	935.96	2.05654	0.601977	3.41631	0.000634749	0.00301447
AT1G49430	2265.67	1.10705	0.254405	4.35152	1.35199e-05	0.000122067
AT1G49450	188.875	4.3001	0.806915	5.32907	9.87192e-08	1.83978e-06
AT1G49470	407.513	1.50268	0.272018	5.52418	3.3102e-08	7.01083e-07
AT1G49580	1657.71	1.17186	0.411168	2.85008	0.0043708	0.0145944
AT1G49660	1747.93	0.682501	0.23329	2.92555	0.00343846	0.0119807
AT1G49730	3039.04	0.645697	0.323037	1.99884	0.045626	0.0949997
AT1G49820	2156.59	0.5302	0.240282	2.20657	0.027344	0.0631415
AT1G49840	724.173	0.804639	0.290141	2.77327	0.00554965	0.0175602
AT1G49860	268.432	3.43748	0.531034	6.47318	9.59602e-11	3.77543e-09
AT1G49870	216.753	1.54654	0.716815	2.15752	0.030965	0.069796
AT1G49960	447.329	1.63	0.592886	2.74927	0.00597289	0.01867
AT1G50010	11240.3	1.11447	0.434001	2.56791	0.0102315	0.028947
AT1G50050	88.7079	2.48046	0.576982	4.29902	1.71557e-05	0.000149417
AT1G50060	50.0715	1.47211	0.386347	3.81034	0.000138776	0.000866377
AT1G50490	754.275	0.667242	0.280903	2.37535	0.0175323	0.0444626
AT1G50630	894.596	0.638922	0.228719	2.79349	0.00521431	0.0167304
AT1G50732	1097.21	1.35453	0.282328	4.79773	1.60472e-06	1.99157e-05
AT1G50740	1003.98	0.749037	0.257142	2.91293	0.00358051	0.0123918
AT1G51060	2181.21	1.37528	0.300406	4.57808	4.69269e-06	4.97408e-05
AT1G51140	1588.5	2.00538	0.172144	11.6494	2.30997e-31	3.27178e-28
AT1G51400	31720.9	2.55947	0.436314	5.86612	4.46112e-09	1.16741e-07
AT1G51805	3472.7	0.896896	0.381424	2.35144	0.0187009	0.0466638
AT1G51830	533.379	1.36423	0.614531	2.21995	0.0264219	0.0614756
AT1G51840	175.102	1.64347	0.716387	2.29411	0.0217844	0.0527773
AT1G52060	73.7658	3.06468	1.14061	2.68688	0.00721234	0.021758
AT1G52070	145.198	3.21864	0.981141	3.28051	0.0010362	0.0045298
AT1G52120	318.682	2.20952	0.457535	4.82918	1.37097e-06	1.74545e-05
AT1G52220	12555.5	0.777725	0.269882	2.88172	0.0039551	0.0134621
AT1G52230	47348.9	1.87265	0.393691	4.75663	1.96848e-06	2.36781e-05
AT1G52290	699.03	1.93547	0.302014	6.40854	1.46922e-10	5.51249e-09
AT1G52340	1188.07	0.65641	0.164957	3.97928	6.91238e-05	0.000480811
AT1G52400	8789.79	3.68056	0.657248	5.59995	2.14408e-08	4.81643e-07
AT1G52410	2247.05	2.75151	0.708373	3.88427	0.000102639	0.000671868
AT1G52660	115.919	2.513	0.742432	3.38482	0.000712257	0.00331577
AT1G52690	335.73	3.02868	0.658867	4.5968	4.29029e-06	4.60353e-05
AT1G52700	103.397	1.12443	0.412456	2.72619	0.00640696	0.0197436
AT1G52720	789.487	0.754639	0.269157	2.80371	0.0050518	0.0163222
AT1G52750	450.329	1.2268	0.578828	2.11946	0.0340519	0.0752716
AT1G53070	173.786	2.29043	0.664642	3.44612	0.000568703	0.00275728
AT1G53130	26.1919	2.82595	1.11751	2.52878	0.0114459	0.0316712
AT1G53140	240.501	1.50081	0.6179	2.42889	0.015145	0.0395228
AT1G53270	185.579	1.46344	0.516069	2.83575	0.00457189	0.0150963
AT1G53290	643.941	0.574341	0.259648	2.212	0.0269668	0.0624914
AT1G53310	13120.8	1.32658	0.280213	4.73418	2.19946e-06	2.60147e-05
AT1G53520	1092.2	1.69593	0.509021	3.33175	0.000863033	0.00389758
AT1G53620	20.3927	1.50311	0.694864	2.16318	0.0305276	0.0690165
AT1G53635	23.2576	3.37765	1.3174	2.56387	0.0103512	0.029227
AT1G53680	181.338	1.88466	0.648867	2.90454	0.00367796	0.0126864
AT1G53830	505.972	2.52414	0.53505	4.71757	2.38673e-06	2.78804e-05
AT1G53840	3525.43	0.530268	0.233534	2.27062	0.0231701	0.0554819
AT1G53860	28.9303	2.19071	0.568902	3.85077	0.000117748	0.000751237
AT1G54095	47.8446	1.16099	0.425517	2.72842	0.00636392	0.0196377
AT1G54200	246.208	1.32555	0.671376	1.97438	0.0483383	0.0996393
AT1G54215	9.11831	2.20936	1.04085	2.12265	0.0337831	0.0748381
AT1G54385	258.162	1.36964	0.572895	2.39074	0.0168146	0.0429501
AT1G54530	68.0977	2.12719	0.535327	3.97362	7.07884e-05	0.000489685
AT1G54540	293.218	1.91871	0.474509	4.04356	5.2645e-05	0.000381651
AT1G54790	252.099	2.75681	0.979409	2.81477	0.00488115	0.0158978
AT1G54940	102.948	3.26943	1.21937	2.68126	0.00733462	0.0220564
AT1G54970	1159.06	2.85901	0.877264	3.259	0.00111805	0.00480784
AT1G54990	1135.98	0.629903	0.262909	2.3959	0.0165798	0.0424844
AT1G55210	1488.89	2.04705	0.467893	4.37503	1.21415e-05	0.000111306
AT1G55240	131.743	0.863037	0.415702	2.07609	0.0378852	0.0818919
AT1G55290	92.139	2.99193	1.13709	2.63121	0.00850814	0.024911
AT1G55330	4883.81	1.0256	0.344069	2.98079	0.00287506	0.0103948
AT1G55580	42.5971	1.25011	0.529723	2.35993	0.0182785	0.045903
AT1G55670	26596.2	1.17685	0.405545	2.90191	0.003709	0.0127624
AT1G55740	635.581	1.64888	0.264668	6.22998	4.66507e-10	1.57321e-08
AT1G56020	216.535	0.511234	0.231822	2.20529	0.0274341	0.0632785
AT1G56230	1046.09	0.626066	0.137637	4.54869	5.39811e-06	5.63223e-05
AT1G56540	185.177	0.821003	0.387892	2.11657	0.0342961	0.075708
AT1G56580	5234.79	1.33868	0.240441	5.56759	2.58282e-08	5.66073e-07
AT1G56630	105.246	1.35194	0.466319	2.89917	0.0037415	0.0128469
AT1G56670	104.582	1.57753	0.49252	3.20298	0.00136015	0.00564744
AT1G56680	28.2319	1.94841	0.631558	3.08508	0.00203496	0.00783489
AT1G57560	154.785	1.36684	0.529166	2.58301	0.00979422	0.0279261
AT1G57570	59.435	3.43438	0.941489	3.64781	0.000264484	0.00147702
AT1G57590	194.572	1.50965	0.583226	2.58844	0.00964107	0.0275449
AT1G58170	117.895	1.48648	0.41004	3.62522	0.000288718	0.00158424
AT1G58270	5258.85	1.5612	0.468839	3.32992	0.000868707	0.00391229
AT1G58280	1092.24	2.30824	0.346057	6.6701	2.5563e-11	1.14942e-09
AT1G58290	16383.9	3.14972	0.325161	9.68665	3.43623e-22	9.27045e-20
AT1G58520	1246.97	1.02035	0.279986	3.64427	0.000268149	0.00149307
AT1G59725	63.4353	3.24664	1.0459	3.10417	0.00190812	0.00744521
AT1G59730	62.5512	1.59575	0.781832	2.04103	0.0412476	0.0876893
AT1G59940	118.933	2.02137	0.734706	2.75126	0.00593665	0.0185721
AT1G59970	444.194	0.646419	0.188527	3.42878	0.000606298	0.00290607
AT1G60050	105.171	4.93638	1.42489	3.46439	0.000531444	0.00260571
AT1G60270	351.695	1.99161	0.54807	3.63387	0.000279205	0.00154215
AT1G60390	337.105	2.14624	0.679423	3.15892	0.00158357	0.00637876
AT1G60550	4778.69	0.882972	0.25812	3.42078	0.000624421	0.00297407
AT1G60810	1555.25	1.73227	0.398394	4.34814	1.37297e-05	0.000123687
AT1G60950	43279.7	2.18492	0.371204	5.88605	3.95526e-09	1.05452e-07
AT1G60960	1143.08	0.843289	0.351581	2.39857	0.0164594	0.0422428
AT1G61050	171.072	1.46404	0.601492	2.43401	0.0149325	0.0390579
AT1G61080	79.4438	2.49759	0.377429	6.61739	3.65602e-11	1.56326e-09
AT1G61170	381.864	1.80734	0.344254	5.25003	1.52074e-07	2.63076e-06
AT1G61240	757.606	0.92029	0.194956	4.72049	2.35276e-06	2.75404e-05
AT1G61260	250.748	2.19665	0.365351	6.01243	1.8276e-09	5.32353e-08
AT1G61520	194196	1.6167	0.416517	3.88147	0.000103825	0.000678457
AT1G61580	1081.03	0.939012	0.253892	3.69847	0.000216902	0.00125075
AT1G61590	913.609	1.46221	0.386617	3.78208	0.000155523	0.000954915
AT1G61795	275.179	1.74725	0.490182	3.5645	0.000364557	0.00191418
AT1G61840	45.6153	1.9741	0.977087	2.0204	0.0433422	0.091149
AT1G61860	95.5532	1.22626	0.512212	2.39405	0.0166634	0.0426256
AT1G61950	56.017	3.21774	1.13094	2.8452	0.00443839	0.0147872
AT1G62190	63.1545	5.47343	1.40159	3.90516	9.41637e-05	0.000625788
AT1G62280	37.6349	2.50771	1.0489	2.3908	0.0168117	0.0429501
AT1G62320	177.566	1.90094	0.708688	2.68234	0.0073109	0.0219968
AT1G62330	1234.85	0.514742	0.252164	2.0413	0.0412215	0.0876652
AT1G62560	543.194	2.90721	0.816016	3.56269	0.000367067	0.00192557
AT1G62660	9475.24	0.50087	0.12451	4.02273	5.7528e-05	0.000411734
AT1G62770	334.758	1.1082	0.366793	3.02133	0.00251669	0.00930396
AT1G62870	91.0701	2.47941	0.812292	3.05236	0.00227048	0.00856285
AT1G62980	754.541	3.08553	0.776594	3.97316	7.09257e-05	0.000490085
AT1G62990	323.037	2.05786	0.580253	3.54649	0.000390407	0.0020218
AT1G63000	4252.86	0.900854	0.218374	4.12527	3.70294e-05	0.000285235
AT1G63220	813.483	1.40888	0.42149	3.34263	0.00082989	0.00376742
AT1G63300	461.846	1.50081	0.651091	2.30507	0.0211626	0.0514799
AT1G63310	248.796	1.41965	0.335538	4.23096	2.32698e-05	0.000192803
AT1G63450	142.016	2.20846	0.748082	2.95216	0.00315559	0.0111877
AT1G63650	113.42	1.54865	0.472205	3.27962	0.00103948	0.0045406
AT1G63820	40.0129	1.59728	0.531478	3.00534	0.0026528	0.00972149
AT1G63930	119.441	1.40587	0.471737	2.9802	0.00288058	0.0104087
AT1G64000	53.785	1.52903	0.738032	2.07176	0.0382878	0.0826045
AT1G64200	2404.22	0.764414	0.188441	4.05653	4.98078e-05	0.000364581
AT1G64210	91.9994	1.04335	0.307034	3.39818	0.000678362	0.00318282
AT1G64370	6784.1	1.14641	0.180987	6.3342	2.38581e-10	8.4745e-09
AT1G64390	1842.64	2.45594	0.733151	3.34983	0.0008086	0.00368999
AT1G64440	1122.52	0.689476	0.168275	4.09733	4.17948e-05	0.00031446
AT1G64460	700.891	0.614554	0.29135	2.10933	0.034916	0.0767177
AT1G64625	308.466	2.07198	0.730674	2.83571	0.00457245	0.0150963
AT1G64640	658.398	1.65761	0.50796	3.26327	0.00110133	0.00474674
AT1G64650	3046.24	0.758669	0.223129	3.40014	0.000673522	0.00316273
AT1G64670	755.521	2.03782	0.389373	5.23361	1.66235e-07	2.84963e-06
AT1G64780	1743.18	2.65271	0.280819	9.44633	3.50906e-21	7.7963e-19
AT1G64860	6343.45	0.892081	0.291951	3.05559	0.0022462	0.00850089
AT1G64910	46.2931	3.70039	1.19551	3.09525	0.00196648	0.00761003
AT1G64920	55.8445	1.47256	0.669598	2.19916	0.0278662	0.0640861
AT1G64970	1555.61	1.46041	0.284941	5.12532	2.97039e-07	4.6576e-06
AT1G65060	475.252	1.80915	0.360285	5.02146	5.12812e-07	7.47834e-06
AT1G65180	69.1907	1.59816	0.614491	2.60079	0.00930101	0.0267623
AT1G65250	299.483	1.7676	0.551195	3.20686	0.00134194	0.00558205
AT1G65330	26.3775	2.39491	0.889869	2.6913	0.00711742	0.0215462
AT1G65710	80.787	2.00129	0.786806	2.54356	0.0109729	0.0306467
AT1G65840	4012.51	0.825632	0.285588	2.89099	0.0038403	0.0131424
AT1G65900	209.291	2.03614	0.493114	4.12914	3.64122e-05	0.000281053
AT1G66020	27.3252	2.14032	0.962832	2.22294	0.02622	0.061144
AT1G66200	31186.2	0.68432	0.224764	3.04461	0.00232982	0.00871259
AT1G66270	4551.94	1.24269	0.374699	3.3165	0.000911536	0.00406686
AT1G66350	180.062	1.74611	0.617545	2.8275	0.0046913	0.0154079
AT1G66470	151.013	1.10125	0.513071	2.14638	0.0318426	0.0713907
AT1G66970	7841.57	0.580426	0.201009	2.88757	0.00388235	0.0132582
AT1G67040	337.872	1.81949	0.414869	4.3857	1.15615e-05	0.000106767
AT1G67050	724.837	1.38508	0.299121	4.63049	3.64799e-06	4.05249e-05
AT1G67090	793957	0.744765	0.27108	2.74739	0.00600708	0.0187551
AT1G67180	107.431	1.47911	0.550905	2.68487	0.0072558	0.0218716
AT1G67330	742.076	1.23425	0.39476	3.12659	0.00176848	0.00698943
AT1G67400	346.888	1.17592	0.319733	3.67782	0.000235234	0.00134009
AT1G67710	291.428	0.973197	0.28557	3.40791	0.000654615	0.00308674
AT1G67730	4611.54	0.853557	0.270448	3.15609	0.00159899	0.00642944
AT1G67740	51989.5	0.978284	0.354048	2.76314	0.00572483	0.0180139
AT1G67750	915.562	2.2831	0.514483	4.43766	9.0943e-06	8.75681e-05
AT1G67860	989.08	1.47569	0.318009	4.64041	3.47716e-06	3.87411e-05
AT1G67870	7233.71	1.98651	0.278414	7.13506	9.67421e-13	5.92533e-11
AT1G67910	649.059	0.657724	0.284981	2.30796	0.0210013	0.0511643
AT1G67940	722.58	0.962688	0.363849	2.64585	0.00814868	0.0240325
AT1G68330	120.717	0.743074	0.344562	2.15657	0.0310389	0.0699208
AT1G68360	46.2387	1.97906	0.660743	2.9952	0.00274263	0.00999573
AT1G68400	1441.72	1.41792	0.342639	4.13825	3.49972e-05	0.000272171
AT1G68470	151.017	2.10005	0.394645	5.32135	1.02998e-07	1.90697e-06
AT1G68520	17507.8	0.855658	0.337862	2.53257	0.0113231	0.0314312
AT1G68570	1346.49	1.04102	0.139949	7.43853	1.01811e-13	7.79473e-12
AT1G68650	196.01	2.91473	1.00065	2.91284	0.00358159	0.0123918
AT1G68810	572.367	1.44319	0.55164	2.61619	0.00889177	0.025834
AT1G68825	22.3026	1.6845	0.790772	2.1302	0.0331553	0.0738515
AT1G68840	6821.56	0.520469	0.235342	2.21154	0.0269983	0.0625472
AT1G68850	645.048	1.3371	0.50603	2.64234	0.00823351	0.0242302
AT1G68880	253.542	2.68202	0.404193	6.6355	3.23407e-11	1.41678e-09
AT1G69050	23.5898	1.5553	0.558016	2.7872	0.00531659	0.0169885
AT1G69080	110.652	2.29922	0.74191	3.09906	0.00194136	0.00753083
AT1G69160	1971.95	1.1932	0.448553	2.66011	0.00781156	0.0232073
AT1G69230	235.507	3.22825	0.65503	4.9284	8.29058e-07	1.12639e-05
AT1G69240	237.744	2.30273	0.634888	3.62698	0.000286755	0.001575
AT1G69440	119.814	1.46881	0.381045	3.8547	0.000115871	0.000740933
AT1G69490	388.455	0.731217	0.258734	2.82613	0.00471135	0.0154647
AT1G69523	581.75	0.66339	0.268871	2.46732	0.013613	0.0363282
AT1G69570	1148.17	0.809008	0.317747	2.54608	0.0108941	0.0304825
AT1G69580	399.865	0.851369	0.26761	3.18138	0.00146574	0.0060001
AT1G69690	837.238	1.64816	0.295044	5.58614	2.32168e-08	5.13808e-07
AT1G69970	46.2358	1.21429	0.589083	2.06132	0.0392722	0.0843269
AT1G69990	31.6362	4.64946	1.5175	3.06391	0.00218467	0.00831244
AT1G70000	560.966	0.84632	0.208296	4.06307	4.84308e-05	0.000355795
AT1G70210	509.561	1.54004	0.557542	2.76219	0.00574151	0.0180564
AT1G70260	302.637	4.78425	0.901522	5.30686	1.11528e-07	2.03585e-06
AT1G70370	4850.42	1.39993	0.167615	8.35201	6.7109e-17	9.27332e-15
AT1G70410	12347.9	0.529866	0.23405	2.2639	0.0235803	0.0563389
AT1G70460	554.386	2.36427	0.580242	4.07463	4.6088e-05	0.000342217
AT1G70500	88.6763	1.6259	0.710794	2.28744	0.02217	0.0535396
AT1G70560	432.584	1.00578	0.38892	2.58609	0.00970707	0.0277055
AT1G70690	480.462	0.891836	0.217156	4.1069	4.0101e-05	0.00030414
AT1G70700	6111.39	0.924759	0.449216	2.05861	0.0395318	0.084788
AT1G70710	912.801	2.21423	0.437504	5.06105	4.16965e-07	6.26608e-06
AT1G70800	84.4261	0.871309	0.360474	2.41712	0.015644	0.0406192
AT1G70890	2812.47	1.03103	0.486695	2.11844	0.0341381	0.075418
AT1G70900	1649.21	1.98729	0.29819	6.66452	2.6554e-11	1.18926e-09
AT1G70940	8109.9	1.34605	0.422328	3.18721	0.00143654	0.00590617
AT1G71050	164.983	1.20344	0.292894	4.10879	3.97734e-05	0.000302059
AT1G71200	283.136	0.994572	0.427838	2.32465	0.0200908	0.0493494
AT1G71695	3845.4	1.19209	0.354372	3.36396	0.000768322	0.00353609
AT1G71740	134.049	1.73874	0.535326	3.248	0.00116217	0.00495992
AT1G71790	572.926	0.516837	0.243003	2.12688	0.0334302	0.0742203
AT1G71830	385.427	0.978803	0.361526	2.70742	0.00678085	0.0207044
AT1G71870	211.69	2.76204	0.349624	7.90004	2.78821e-15	2.77133e-13
AT1G71930	29.2471	2.35355	0.801238	2.93739	0.00330986	0.0116219
AT1G71960	681.835	1.21477	0.277723	4.37406	1.21958e-05	0.000111534
AT1G72030	1276.55	1.23568	0.245533	5.03263	4.83794e-07	7.11007e-06
AT1G72140	527.115	1.99798	0.608142	3.28538	0.00101847	0.00446777
AT1G72200	507.552	0.903591	0.259951	3.47601	0.000508937	0.0025081
AT1G72250	381.519	1.47779	0.608673	2.42788	0.0151874	0.0396152
AT1G72310	788.167	0.782234	0.282868	2.76537	0.00568582	0.017926
AT1G72450	3547.88	1.16758	0.389053	3.0011	0.0026901	0.00984229
AT1G72870	83.5021	1.09469	0.506057	2.16317	0.0305278	0.0690165
AT1G72930	3566.44	1.09448	0.403212	2.71439	0.00663978	0.0203284
AT1G73010	383.43	2.96593	0.567344	5.22773	1.716e-07	2.92832e-06
AT1G73080	1866.23	0.531234	0.200081	2.65509	0.00792873	0.0235369
AT1G73120	1137.66	3.66985	0.226492	16.2031	4.79863e-59	2.71866e-55
AT1G73220	436.13	3.35329	0.344002	9.74789	1.88348e-22	5.33541e-20
AT1G73360	168.283	0.950829	0.294629	3.2272	0.00125006	0.00526167
AT1G73410	77.4973	1.20046	0.5215	2.30193	0.0213393	0.0518429
AT1G73480	2421.68	0.730279	0.280724	2.60141	0.00928412	0.026734
AT1G73580	158.105	3.12162	0.926863	3.36794	0.000757332	0.00349403
AT1G73590	546.479	1.9608	0.453117	4.32737	1.50903e-05	0.000133919
AT1G73600	8111.02	1.84613	0.626225	2.94804	0.00319799	0.011321
AT1G73620	325.912	1.61224	0.439031	3.67226	0.000240414	0.00136207
AT1G73860	231.57	2.18646	0.678368	3.22311	0.00126807	0.00531576
AT1G74090	1282.27	1.37561	0.385338	3.56987	0.000357153	0.00187932
AT1G74460	1267.91	2.40162	0.622906	3.85552	0.000115486	0.00074007
AT1G74470	82663	1.16854	0.294835	3.96337	7.38999e-05	0.000507799
AT1G74500	129.197	3.00774	0.628404	4.78632	1.69869e-06	2.08989e-05
AT1G74520	1217.17	0.890509	0.238824	3.72873	0.000192448	0.00113172
AT1G74830	82.9625	3.47621	1.16319	2.98852	0.00280332	0.0101744
AT1G74840	4047.17	0.518629	0.232495	2.23071	0.0257005	0.0602176
AT1G75030	126.6	2.27861	0.700709	3.25186	0.00114653	0.00491236
AT1G75160	70.2014	2.90255	0.839097	3.45914	0.000541908	0.00265242
AT1G75500	9968.52	1.29125	0.434156	2.97417	0.00293785	0.0105645
AT1G75550	72.9063	1.92127	0.826927	2.32339	0.0201583	0.0494732
AT1G75590	64.6107	1.71544	0.47064	3.64492	0.000267477	0.00149006
AT1G75620	94.0029	2.3953	0.81025	2.95625	0.00311402	0.0110819
AT1G75680	3992.91	0.806604	0.288383	2.79699	0.00515818	0.0165996
AT1G75720	19.4689	2.01746	0.91022	2.21645	0.0266604	0.0619543
AT1G76100	11312.2	1.45275	0.385105	3.77234	0.000161723	0.000985737
AT1G76310	226.541	1.45789	0.695142	2.09726	0.035971	0.0785387
AT1G76350	740.921	0.750974	0.28664	2.61992	0.00879507	0.0256122
AT1G76430	33.2444	1.52644	0.753648	2.0254	0.042826	0.0903316
AT1G76540	547.732	1.68411	0.524876	3.20859	0.00133387	0.00555579
AT1G76760	218.896	0.625134	0.279919	2.23327	0.0255311	0.0599446
AT1G76800	134.681	1.86139	0.393511	4.7302	2.24301e-06	2.64745e-05
AT1G77110	61.5	1.82741	0.850936	2.14752	0.0317515	0.0712288
AT1G77260	1958.81	0.568637	0.123338	4.61041	4.01873e-06	4.35753e-05
AT1G77330	1370.32	1.35267	0.458716	2.94881	0.00319002	0.0113027
AT1G77420	503.705	0.818733	0.33877	2.41678	0.0156584	0.0406472
AT1G77490	6341.45	1.29263	0.377789	3.42157	0.000622603	0.00296666
AT1G77520	310.291	4.4488	1.18544	3.75288	0.000174813	0.0010486
AT1G77530	93.2515	2.81242	0.976909	2.8789	0.00399066	0.0135668
AT1G77580	853.529	0.885832	0.344489	2.57144	0.0101277	0.0287394
AT1G77590	2746.24	2.2115	0.457278	4.83623	1.32328e-06	1.69233e-05
AT1G77690	924.06	1.48931	0.424273	3.51026	0.000447662	0.00226045
AT1G77855	93.2603	2.84417	0.719757	3.95157	7.76398e-05	0.000529006
AT1G78020	2773.63	1.89819	0.23415	8.10673	5.19999e-16	6.01236e-14
AT1G78090	197.124	1.35206	0.509206	2.65524	0.00792531	0.023533
AT1G78100	1516.89	1.18797	0.364305	3.26092	0.00111053	0.00478067
AT1G78110	606.494	0.772642	0.139433	5.54133	3.0019e-08	6.45436e-07
AT1G78120	413.574	1.91394	0.480057	3.9869	6.69424e-05	0.000467936
AT1G78230	825.274	0.906014	0.208725	4.34071	1.42022e-05	0.000127013
AT1G78260	734.555	0.737783	0.344946	2.13883	0.0324491	0.0725352
AT1G78370	8017.6	2.66424	0.578365	4.60651	4.09488e-06	4.4274e-05
AT1G78430	112.164	1.83789	0.814788	2.25567	0.0240916	0.0572529
AT1G78450	471.12	1.30051	0.324854	4.00338	6.2445e-05	0.000440302
AT1G78570	5916.91	1.26054	0.230892	5.45945	4.77621e-08	9.66408e-07
AT1G78580	2076	1.07385	0.287447	3.7358	0.00018712	0.00110719
AT1G78680	2892.91	0.684651	0.188939	3.62366	0.000290462	0.0015915
AT1G78700	1203.6	0.848772	0.294921	2.87797	0.00400245	0.0135987
AT1G78815	48.2042	2.33764	0.915744	2.55272	0.0106885	0.0299855
AT1G78940	64.7777	2.4904	0.61587	4.04371	5.2611e-05	0.000381648
AT1G78950	118.675	1.09801	0.460854	2.38256	0.0171926	0.0437578
AT1G78970	619.747	1.64101	0.566804	2.89519	0.00378924	0.0129912
AT1G79040	163024	0.850563	0.354912	2.39655	0.0165504	0.0424377
AT1G79320	190.737	1.25269	0.507598	2.46787	0.0135919	0.0362889
AT1G79330	149.364	2.02747	0.562333	3.60547	0.000311587	0.00168686
AT1G79530	3490.55	1.49803	0.319245	4.69241	2.70009e-06	3.10291e-05
AT1G79620	361.542	1.51107	0.523137	2.88847	0.00387115	0.013228
AT1G79760	56.3972	2.20289	0.89091	2.47263	0.0134124	0.0358942
AT1G79790	2384.68	0.714183	0.340864	2.09522	0.0361519	0.0788264
AT1G79860	73.6862	2.81004	1.09055	2.57673	0.00997405	0.0283888
AT1G80050	774.395	0.702702	0.184547	3.80771	0.00014026	0.000873715
AT1G80120	226.438	1.06731	0.41748	2.55655	0.0105716	0.0297163
AT1G80170	417.137	0.809992	0.286273	2.82944	0.00466294	0.015328
AT1G80240	357.851	3.34588	0.735687	4.54797	5.41658e-06	5.6463e-05
AT1G80280	748.752	2.34578	0.737011	3.18283	0.00145842	0.00597448
AT1G80370	196.07	0.988317	0.300088	3.29342	0.000989769	0.00436045
AT1G80520	62.7099	2.35069	0.726679	3.23484	0.00121709	0.00515193
AT1G80640	2158.99	0.667198	0.217079	3.07352	0.00211548	0.00808984
AT1G80690	329.911	2.41167	0.521186	4.62728	3.70508e-06	4.10785e-05
AT1G80760	158.108	2.38194	0.550484	4.327	1.51157e-05	0.000133919
AT2G01150	471.904	2.00259	0.369195	5.42421	5.82109e-08	1.15717e-06
AT2G01420	5136.15	0.719921	0.286347	2.51416	0.0119318	0.0327676
AT2G01570	4618.15	0.934086	0.266082	3.51053	0.000447219	0.00225922
AT2G01580	86.394	1.48437	0.538223	2.7579	0.00581736	0.0182443
AT2G01590	2808.61	0.606258	0.280375	2.16231	0.0305941	0.0691248
AT2G01830	1104.12	0.93792	0.439315	2.13496	0.0327644	0.0731535
AT2G01890	822.229	0.765604	0.377825	2.02634	0.0427295	0.090212
AT2G01950	864.281	1.54555	0.516621	2.99166	0.00277464	0.0100962
AT2G02250	26.899	2.3082	0.759142	3.04054	0.00236158	0.00881392
AT2G02610	76.4994	1.92866	0.860611	2.24103	0.0250239	0.0589614
AT2G02790	899.027	0.673294	0.277128	2.42954	0.0151178	0.0394701
AT2G03090	563.654	2.58993	0.64685	4.00392	6.23026e-05	0.000439571
AT2G03500	137.899	0.65757	0.267415	2.45899	0.0139328	0.0369898
AT2G03590	189.501	1.75522	0.635932	2.76008	0.00577868	0.0181481
AT2G03720	305.294	2.97935	0.991022	3.00634	0.00264413	0.00970227
AT2G04170	655.439	1.03087	0.435673	2.36615	0.0179743	0.0452997
AT2G04390	3776.74	0.638205	0.193612	3.29631	0.000979644	0.00432257
AT2G04680	90.9269	2.46715	0.900118	2.74092	0.00612671	0.0190719
AT2G04780	2523.33	1.67802	0.39724	4.2242	2.39789e-05	0.000197672
AT2G05070	140766	1.94901	0.488152	3.99263	6.53447e-05	0.000459318
AT2G05100	165892	1.42111	0.393534	3.61115	0.000304847	0.00165353
AT2G05160	338.844	1.4462	0.586722	2.46488	0.0137059	0.0365243
AT2G05920	7060.17	0.737725	0.169339	4.3565	1.32158e-05	0.000119607
AT2G06050	2212.66	1.27444	0.602903	2.11384	0.0345291	0.0760593
AT2G06520	60394.7	1.4233	0.355038	4.00887	6.10106e-05	0.000432069
AT2G07170	240.957	1.26328	0.53906	2.34349	0.0191044	0.0474176
AT2G07690	783.269	0.55904	0.26997	2.07075	0.0383819	0.0827604
AT2G11810	166.035	4.96977	0.964923	5.15043	2.59886e-07	4.15928e-06
AT2G12400	1166.92	1.44539	0.415831	3.47592	0.000509101	0.0025081
AT2G12646	67.9407	1.0921	0.509611	2.14301	0.0321127	0.0718824
AT2G13810	23.091	1.53015	0.705616	2.16853	0.0301181	0.0683082
AT2G13820	657.606	2.08959	0.547157	3.81899	0.000133998	0.000842113
AT2G14095	71.1481	2.35439	0.696919	3.37829	0.000729392	0.0033775
AT2G14520	178.62	1.31596	0.369751	3.55905	0.000372198	0.00194708
AT2G14750	2711.51	0.922029	0.421035	2.18991	0.0285308	0.06527
AT2G14760	33.5279	4.3151	1.09311	3.94753	7.89616e-05	0.000536679
AT2G14890	6051.36	1.4902	0.438635	3.39736	0.000680402	0.00318844
AT2G14960	30.7527	3.08331	1.27806	2.4125	0.0158435	0.0410551
AT2G15440	122.953	1.46128	0.32657	4.47462	7.65481e-06	7.62855e-05
AT2G15620	9814.21	1.45784	0.169537	8.59892	8.04677e-18	1.23214e-15
AT2G15970	9186.2	0.691677	0.218727	3.16228	0.00156539	0.00632126
AT2G16760	193.76	2.47067	0.533607	4.63013	3.65432e-06	4.05555e-05
AT2G16850	403.101	1.75308	0.474926	3.69126	0.000223147	0.00128089
AT2G16890	274.35	1.19531	0.379677	3.14823	0.00164264	0.00657694
AT2G16980	229.558	1.649	0.770609	2.13986	0.0323661	0.0723639
AT2G16990	293.721	0.658796	0.309884	2.12595	0.0335077	0.0743442
AT2G17055	7.73196	3.52942	1.41005	2.50305	0.0123129	0.0335864
AT2G17265	1274.62	0.899684	0.217912	4.12866	3.64886e-05	0.000281452
AT2G17280	313.915	0.854168	0.431874	1.97782	0.0479493	0.0989823
AT2G17300	266.351	1.90835	0.333542	5.72146	1.05612e-08	2.58464e-07
AT2G17620	59.0832	2.03901	0.975553	2.09011	0.0366079	0.0796627
AT2G17840	1939.25	0.574539	0.161756	3.55188	0.000382489	0.00199172
AT2G17890	26.0494	2.95375	1.4692	2.01045	0.0443836	0.0930454
AT2G17940	9.80963	3.25063	1.46007	2.22635	0.0259909	0.0607349
AT2G17990	2227.04	0.628585	0.137242	4.58012	4.64713e-06	4.94429e-05
AT2G18150	1239.63	1.48766	0.382303	3.89132	9.96999e-05	0.000654519
AT2G18230	1404.75	2.1862	0.205441	10.6415	1.9102e-26	1.2732e-23
AT2G18360	629.594	1.01738	0.392856	2.5897	0.00960592	0.0274652
AT2G18370	1190.3	1.04393	0.391387	2.66725	0.0076474	0.0228093
AT2G18470	68.0732	2.44009	1.20182	2.03033	0.0423226	0.0895197
AT2G18500	61.0294	0.985081	0.466181	2.11309	0.0345932	0.0761413
AT2G18550	38.541	1.7581	0.779282	2.25605	0.0240675	0.0572348
AT2G18560	749.984	0.509168	0.205368	2.4793	0.013164	0.0353463
AT2G18570	333.574	1.75378	0.341845	5.13032	2.89244e-07	4.55197e-06
AT2G18720	240.762	3.59948	1.31457	2.73814	0.00617874	0.0192075
AT2G18790	5487.24	0.547281	0.22992	2.38031	0.0172982	0.0439772
AT2G18800	75.2387	2.65024	0.935156	2.83401	0.00459682	0.0151547
AT2G18890	766.743	0.564656	0.250135	2.2574	0.0239829	0.0570784
AT2G18980	502.676	2.06327	0.513631	4.01703	5.89366e-05	0.000419743
AT2G19150	53.5411	1.48424	0.71094	2.08772	0.0368231	0.0800542
AT2G19410	114.707	1.84119	0.842063	2.18652	0.0287773	0.065741
AT2G19570	2125.93	0.735554	0.332007	2.21548	0.0267273	0.0620715
AT2G19690	102.722	1.57867	0.34202	4.61573	3.91724e-06	4.27613e-05
AT2G19730	13092.1	0.559422	0.175287	3.19147	0.00141552	0.00583035
AT2G19760	4388.01	0.987426	0.194512	5.07642	3.84612e-07	5.81072e-06
AT2G19920	160.548	2.70174	0.913726	2.95684	0.00310812	0.0110679
AT2G19970	410.903	1.7188	0.31234	5.50299	3.73411e-08	7.79211e-07
AT2G19990	66.9839	2.29318	0.385283	5.95193	2.64991e-09	7.39561e-08
AT2G20260	14378.9	1.2339	0.401282	3.07489	0.00210581	0.00806114
AT2G20515	90.8779	2.37164	0.926802	2.55895	0.0104989	0.029552
AT2G20590	97.8346	1.59739	0.752024	2.12412	0.0336605	0.0746247
AT2G20610	2657.2	0.814635	0.274162	2.97136	0.00296484	0.0106413
AT2G20630	4994.23	1.02425	0.177493	5.77066	7.89637e-09	1.9839e-07
AT2G20750	509.939	5.02717	0.893436	5.62679	1.83599e-08	4.22838e-07
AT2G20825	21.8904	1.56328	0.739761	2.11322	0.0345817	0.0761413
AT2G20835	69.6066	2.73079	0.770114	3.54595	0.000391198	0.00202497
AT2G20840	821.964	0.515407	0.221229	2.32975	0.0198195	0.0487675
AT2G20980	129.987	0.663176	0.333334	1.98952	0.0466436	0.0967273
AT2G21045	905.353	1.4698	0.35792	4.1065	4.01704e-05	0.000304462
AT2G21050	866.508	1.82237	0.521441	3.49487	0.000474297	0.00236439
AT2G21100	498.316	2.69021	0.419116	6.41877	1.37378e-10	5.2236e-09
AT2G21140	3341.76	1.21276	0.323479	3.7491	0.00017747	0.00106061
AT2G21195	458.551	0.715921	0.265094	2.70063	0.00692075	0.0210295
AT2G21300	3229.53	0.674288	0.235701	2.86077	0.00422608	0.0142348
AT2G21330	87234.2	1.52263	0.290436	5.24255	1.58373e-07	2.72718e-06
AT2G21650	154.72	4.38799	0.826864	5.30679	1.11576e-07	2.03585e-06
AT2G21880	236.577	1.83289	0.646603	2.83465	0.00458762	0.0151375
AT2G22170	3433.61	1.27755	0.245336	5.20735	1.91562e-07	3.21092e-06
AT2G22190	183.403	1.46446	0.493925	2.96494	0.00302744	0.0108268
AT2G22200	51.0445	2.36098	0.73586	3.20846	0.00133446	0.00555579
AT2G22240	2056.22	2.61302	0.235286	11.1057	1.17639e-28	1.06623e-25
AT2G22330	2152.84	1.42203	0.33616	4.23021	2.33469e-05	0.000193097
AT2G22510	1188.57	1.32272	0.43595	3.03412	0.00241242	0.00896232
AT2G22540	3117.5	0.916488	0.208153	4.40296	1.06783e-05	9.9832e-05
AT2G22560	519.455	0.98929	0.34599	2.8593	0.00424577	0.0142926
AT2G22590	13.022	2.58525	0.848834	3.04565	0.00232176	0.00870256
AT2G22610	308.745	1.58342	0.604906	2.61764	0.00885414	0.0257445
AT2G22620	293.647	1.35297	0.392619	3.44601	0.000568927	0.00275728
AT2G22660	4781.93	0.549691	0.220283	2.49539	0.012582	0.0341394
AT2G22670	7736.86	1.00246	0.29854	3.35789	0.000785407	0.0036074
AT2G22930	182.959	2.28458	1.05973	2.15581	0.0310984	0.070027
AT2G23000	1348.65	1.36892	0.528405	2.59067	0.00957904	0.0274344
AT2G23290	1601.98	0.825825	0.322319	2.56214	0.010403	0.0293444
AT2G23300	242.76	1.57279	0.342651	4.59007	4.431e-06	4.74104e-05
AT2G23530	68.7166	1.74482	0.794656	2.19569	0.0281143	0.0645387
AT2G23540	1645.29	1.97397	0.593045	3.32853	0.000873056	0.00392875
AT2G23630	266.707	3.64481	0.903407	4.03451	5.47159e-05	0.000394142
AT2G23700	439.104	1.25622	0.413192	3.04029	0.00236352	0.00881827
AT2G23770	748.686	0.513164	0.139375	3.68191	0.000231497	0.00132145
AT2G23950	715.542	0.866526	0.26918	3.21913	0.00128579	0.00537415
AT2G24010	138.225	4.83122	0.889243	5.43295	5.54291e-08	1.10381e-06
AT2G24140	125.32	2.33408	0.776767	3.00487	0.00265695	0.00973358
AT2G24150	3141.26	1.37442	0.185919	7.39256	1.44028e-13	1.07367e-11
AT2G24170	436.672	1.31567	0.4644	2.83304	0.00461069	0.0151894
AT2G24300	331.241	1.26624	0.423358	2.99095	0.00278115	0.010115
AT2G24440	129.261	1.99238	0.489453	4.07062	4.68873e-05	0.000347068
AT2G24540	613.006	0.795695	0.18057	4.40657	1.05021e-05	9.8543e-05
AT2G24610	321.594	1.82072	0.549174	3.31537	0.000915206	0.00407954
AT2G24762	802.106	1.43492	0.403138	3.55939	0.000371722	0.00194549
AT2G24790	13096.1	1.47797	0.263523	5.60851	2.04076e-08	4.63404e-07
AT2G24980	5180.21	3.31562	0.94793	3.49775	0.000469195	0.00234205
AT2G25060	582.289	2.04675	0.62628	3.26811	0.00108269	0.00468423
AT2G25130	20.3781	2.10841	0.713682	2.95428	0.00313401	0.011131
AT2G25160	777.396	2.60283	0.886186	2.93711	0.00331282	0.0116251
AT2G25240	185.69	2.78432	0.865568	3.21676	0.00129647	0.00541479
AT2G25260	288.614	1.11996	0.444559	2.51927	0.0117598	0.0324051
AT2G25625	717.016	0.934572	0.298843	3.12731	0.00176416	0.00697479
AT2G25810	570.746	2.26101	0.580024	3.89814	9.6935e-05	0.000639717
AT2G26260	451.837	1.70671	0.374607	4.556	5.21371e-06	5.46499e-05
AT2G26330	3398.36	0.703111	0.304864	2.30631	0.021093	0.0513217
AT2G26390	15.2066	1.58883	0.742454	2.13997	0.0323569	0.0723639
AT2G26410	100.498	2.49572	0.800467	3.11783	0.00182187	0.00715798
AT2G26420	133.091	2.62918	0.807673	3.25525	0.00113293	0.00486814
AT2G26500	23888.1	0.88943	0.42114	2.11196	0.0346902	0.0763103
AT2G26520	32.8945	2.2141	0.914621	2.42079	0.015487	0.040293
AT2G26695	285.393	2.07165	0.430281	4.81465	1.47456e-06	1.85854e-05
AT2G26730	2042.18	0.675277	0.250625	2.69437	0.00705214	0.0213886
AT2G26750	185.364	2.06464	0.886595	2.32873	0.0198734	0.0488896
AT2G26760	227.133	1.8155	0.821526	2.20991	0.0271112	0.0627246
AT2G27035	25.0918	1.66464	0.560288	2.97104	0.00296789	0.0106489
AT2G27040	1694.75	1.1118	0.260305	4.27114	1.9448e-05	0.000165813
AT2G27050	5990.84	0.662487	0.168929	3.92169	8.79318e-05	0.000590258
AT2G27370	274.702	1.89461	0.540652	3.50431	0.000457799	0.00229934
AT2G27510	2714.01	0.967603	0.297416	3.25337	0.00114047	0.00489493
AT2G27710	13073.1	0.536882	0.143561	3.73974	0.00018421	0.00109392
AT2G27740	80.3102	2.27093	0.996157	2.27969	0.0226259	0.0543511
AT2G27820	1023.69	1.01739	0.229093	4.44097	8.95556e-06	8.65831e-05
AT2G27920	736.227	0.911867	0.454771	2.00511	0.0449509	0.0939047
AT2G28080	476.927	0.596265	0.267399	2.22987	0.025756	0.0602978
AT2G28140	118.758	0.650186	0.283505	2.29338	0.021826	0.0528667
AT2G28150	1429.77	0.79525	0.258842	3.07234	0.00212389	0.0081139
AT2G28160	463.259	1.39584	0.567458	2.45981	0.0139009	0.0369224
AT2G28250	578.391	1.98941	0.556067	3.57764	0.00034671	0.00183492
AT2G28270	5.00115	5.74194	2.38488	2.40765	0.0160557	0.0414414
AT2G28305	1406.29	0.554066	0.267834	2.06869	0.0385752	0.0831297
AT2G28315	186.154	2.22677	0.801245	2.77914	0.00545029	0.0173197
AT2G28350	1093.35	0.525075	0.222876	2.35591	0.0184776	0.0462853
AT2G28410	241.266	1.99336	0.592396	3.3649	0.000765707	0.00352836
AT2G28470	6340.79	1.22659	0.384452	3.1905	0.00142027	0.00584565
AT2G28550	2369.04	0.834012	0.28475	2.92893	0.00340136	0.0118733
AT2G28620	502.749	1.62377	0.702279	2.31215	0.0207697	0.0506764
AT2G28740	1616.29	0.753956	0.290571	2.59474	0.00946624	0.0271618
AT2G28780	559.012	4.47666	0.545343	8.20889	2.23241e-16	2.82174e-14
AT2G28850	14.6984	7.30377	3.03224	2.40871	0.0160092	0.0413683
AT2G28860	36.8736	8.63157	1.6268	5.30586	1.12142e-07	2.0429e-06
AT2G28950	3545.49	2.41553	0.404804	5.96717	2.41401e-09	6.80428e-08
AT2G29000	25.2707	2.79086	1.29778	2.15048	0.0315169	0.0708341
AT2G29050	601.424	0.886066	0.34562	2.5637	0.0103562	0.029227
AT2G29125	54.2014	2.34289	0.684671	3.42192	0.000621796	0.00296482
AT2G29330	427.725	1.39497	0.351645	3.96697	7.27931e-05	0.000501714
AT2G29410	42.9439	1.12371	0.430101	2.61267	0.00898392	0.0260683
AT2G29440	227.785	1.5032	0.381278	3.94254	8.06225e-05	0.000545068
AT2G29750	624.95	2.75979	0.740803	3.7254	0.000195008	0.00114311
AT2G29890	507.474	1.56677	0.506507	3.09329	0.00197949	0.00765253
AT2G29960	2824.73	0.58275	0.140767	4.13982	3.47581e-05	0.000270683
AT2G29980	4048.99	0.634708	0.241751	2.62546	0.00865311	0.0252572
AT2G30130	53.1179	1.69703	0.808328	2.09944	0.0357786	0.0782589
AT2G30210	1430.01	2.39699	0.577061	4.1538	3.26999e-05	0.000256417
AT2G30340	139.261	1.56784	0.321558	4.87577	1.08384e-06	1.42471e-05
AT2G30395	116.941	1.2496	0.564857	2.21224	0.0269501	0.0624864
AT2G30540	276.987	1.26405	0.430348	2.93727	0.00331112	0.0116228
AT2G30570	70590.2	1.30151	0.358708	3.62832	0.000285267	0.00156759
AT2G30615	462.345	0.867366	0.389927	2.22443	0.0261195	0.0609723
AT2G30660	291.91	2.10225	0.80679	2.60569	0.00916885	0.0264866
AT2G30820	320.709	2.35284	1.00409	2.34326	0.0191162	0.0474286
AT2G30860	16108.9	1.30247	0.274419	4.74628	2.0719e-06	2.47644e-05
AT2G31220	38.309	2.52939	1.08736	2.32617	0.0200092	0.049181
AT2G31480	15.3339	2.14793	1.00824	2.13038	0.0331404	0.0738464
AT2G31540	73.9684	4.76076	1.24302	3.82999	0.000128147	0.000810738
AT2G31560	558.487	0.717962	0.14744	4.86951	1.11873e-06	1.46378e-05
AT2G31790	3211.78	0.688812	0.150077	4.58971	4.43857e-06	4.74467e-05
AT2G31900	539.395	0.815527	0.35208	2.31631	0.0205413	0.0501949
AT2G32010	892.23	1.04015	0.431083	2.41287	0.0158274	0.0410296
AT2G32060	5729.91	0.804317	0.195787	4.10812	3.98892e-05	0.000302736
AT2G32160	479.022	1.55075	0.522415	2.96843	0.0029933	0.0107265
AT2G32270	326.945	1.40254	0.457349	3.06667	0.00216457	0.00824429
AT2G32300	625.54	1.73327	0.566312	3.06063	0.00220869	0.00838133
AT2G32380	582.959	0.773378	0.255968	3.02139	0.00251616	0.00930396
AT2G32510	155.385	2.00579	0.58008	3.45779	0.000544634	0.00266231
AT2G32560	2417.25	1.88475	0.40556	4.64727	3.36355e-06	3.76713e-05
AT2G32590	183.188	1.40005	0.549377	2.54844	0.0108206	0.030303
AT2G32720	1498.65	1.38193	0.332224	4.15963	3.18759e-05	0.000251963
AT2G32960	1100.94	2.66464	0.380684	6.99962	2.5666e-12	1.44688e-10
AT2G33020	27.2728	2.82262	0.923403	3.05676	0.00223747	0.00847919
AT2G33205	110.248	1.70866	0.796974	2.14394	0.0320377	0.0717712
AT2G33230	82.6992	9.79501	2.45031	3.99745	6.40274e-05	0.000450618
AT2G33310	1613.11	0.700473	0.252677	2.77221	0.00556772	0.0175977
AT2G33385	36.15	1.50466	0.640562	2.34898	0.018825	0.0469012
AT2G33530	1228.07	0.629952	0.171983	3.66288	0.000249398	0.00140524
AT2G33570	1542.9	1.46161	0.259563	5.63105	1.79119e-08	4.13361e-07
AT2G33850	2326.36	2.89715	0.559362	5.17937	2.22635e-07	3.64548e-06
AT2G34030	27.7005	4.04402	1.6176	2.50001	0.0124188	0.033802
AT2G34150	307.422	2.38876	0.551662	4.33013	1.49024e-05	0.000132646
AT2G34190	215.538	1.58913	0.660954	2.40429	0.0162039	0.0417193
AT2G34325	173.915	3.27876	1.38358	2.36976	0.0177996	0.0449491
AT2G34390	131.934	1.8499	0.741704	2.49412	0.0126269	0.0342203
AT2G34420	284105	1.48969	0.421668	3.53287	0.000411082	0.00210482
AT2G34470	1373.7	1.01762	0.229932	4.42575	9.61089e-06	9.17447e-05
AT2G34510	4438.49	1.7065	0.414953	4.11252	3.91358e-05	0.000298618
AT2G34560	4479.16	1.24077	0.218424	5.68054	1.3427e-08	3.20297e-07
AT2G34610	393.342	2.14645	0.485445	4.42161	9.79671e-06	9.32828e-05
AT2G34620	4168.8	2.97579	0.420347	7.07938	1.44797e-12	8.59001e-11
AT2G34655	532.834	2.6719	1.15276	2.31783	0.0204586	0.0500684
AT2G34770	5760.21	0.888058	0.353254	2.51394	0.0119392	0.0327742
AT2G34790	503.644	1.72753	0.551804	3.1307	0.00174392	0.00691648
AT2G34810	821.075	1.21687	0.353374	3.44356	0.000574103	0.00277406
AT2G34830	186.75	1.37983	0.417617	3.30406	0.000952961	0.00422127
AT2G34850	58.6452	1.82887	0.56363	3.2448	0.00117533	0.00501154
AT2G35000	191.257	1.89083	0.288125	6.56254	5.28985e-11	2.19558e-09
AT2G35020	978.088	1.15827	0.318697	3.63439	0.000278643	0.00154064
AT2G35120	2226.97	1.29909	0.343493	3.78199	0.000155581	0.000954915
AT2G35150	50.0477	3.75833	0.802239	4.6848	2.80237e-06	3.20744e-05
AT2G35210	38.9522	3.45531	1.32346	2.6108	0.00903299	0.0261839
AT2G35260	14074.5	0.936186	0.306406	3.05537	0.0022478	0.0085041
AT2G35270	137.715	1.04733	0.42718	2.45173	0.014217	0.0375332
AT2G35340	435.305	0.874264	0.352356	2.48119	0.0130943	0.0352009
AT2G35345	25.9526	1.38331	0.570774	2.42356	0.0153692	0.0400342
AT2G35650	1370.33	0.706368	0.244187	2.89273	0.0038191	0.0130777
AT2G35760	346.112	1.61618	0.408572	3.95568	7.6317e-05	0.000521547
AT2G35770	412.424	2.96706	0.633113	4.68646	2.77975e-06	3.18799e-05
AT2G35860	1811.44	2.26957	0.394948	5.74651	9.11049e-09	2.25888e-07
AT2G35880	3332.64	0.682837	0.329347	2.0733	0.0381442	0.0823574
AT2G35960	655.566	1.80208	0.360375	5.00058	5.71572e-07	8.17737e-06
AT2G36050	832.866	2.6118	0.503545	5.18683	2.13901e-07	3.52285e-06
AT2G36090	282.217	1.33407	0.297095	4.49038	7.10966e-06	7.16722e-05
AT2G36100	1086	2.14313	0.603148	3.55324	0.000380517	0.00198327
AT2G36200	573.593	0.990576	0.457404	2.16565	0.0303382	0.0686562
AT2G36210	48.2642	1.65673	0.758017	2.18561	0.0288444	0.0658811
AT2G36290	1927.96	1.10736	0.2497	4.43475	9.21806e-06	8.85168e-05
AT2G36295	45.6361	1.82545	0.90251	2.02263	0.0431111	0.0907808
AT2G36430	717.078	0.674563	0.188171	3.58484	0.000337279	0.00179338
AT2G36570	1033.01	2.74184	0.594226	4.61414	3.94734e-06	4.30484e-05
AT2G36620	8593.86	0.702415	0.171676	4.09152	4.28561e-05	0.00032053
AT2G36670	636.198	0.573719	0.177464	3.23287	0.00122553	0.00517575
AT2G36830	15615	1.4856	0.304567	4.87773	1.07311e-06	1.41395e-05
AT2G36870	629.413	2.67448	0.565748	4.72733	2.27491e-06	2.67674e-05
AT2G36880	15997.2	0.927214	0.251532	3.68627	0.000227562	0.00130359
AT2G36885	415.214	3.62789	0.37217	9.74794	1.88252e-22	5.33541e-20
AT2G37040	15262.5	1.0548	0.385371	2.73711	0.00619824	0.0192523
AT2G37090	106.452	2.23319	0.932337	2.39526	0.0166087	0.0425489
AT2G37170	11820.9	1.5495	0.280338	5.52727	3.25259e-08	6.91465e-07
AT2G37180	3062.27	1.10666	0.351445	3.14889	0.00163894	0.00656446
AT2G37370	57.0618	2.00728	0.502892	3.99146	6.56668e-05	0.000460725
AT2G37380	46.2069	2.18104	0.865106	2.52113	0.011698	0.0322742
AT2G37390	122.279	1.92757	0.702687	2.74314	0.00608549	0.0189653
AT2G37470	1521.87	0.680794	0.272082	2.50217	0.0123435	0.0336537
AT2G37640	904.812	1.89342	0.49875	3.79634	0.000146848	0.000907268
AT2G37670	101.59	2.06187	0.806673	2.55601	0.0105879	0.02974
[truncated: 1,647 more rows]
