# Supplementary material for: Key Pathways and Genes of Arabidopsis thaliana and Arabidopsis halleri Roots under Cadmium Stress Responses: Differences and Similarities
Source: Plants (Basel). 2023 Apr 27;12(9):1793. doi: 10.3390/plants12091793 (PMC10180823; doi:10.3390/plants12091793)
Supplement: Supplementary file 1 [file plants-12-01793-s001.zip › Supplementary file S4.xlsx]

## Sheet: Tab. S4a
Table S4a: functional enrichment of the differentially expressed genes (DEGs) detected as downregulated under Cd stress responses in A. halleri root
Bold for top three molecular functions (MFs), biological processes (BPs) or KEGG pathways
source	term_name	term_id	highlighted	adjusted_p_value	negative_log10_of_adjusted_p_value	term_size	query_size	intersection_size	effective_domain_size	intersections
GO:MF	catalytic activity, acting on a protein	GO:0140096	true	3.61805e-08	7.44153	2804	1065	199	23352	AT1G70130,AT1G64500,AT1G66830,AT2G26330,AT5G19110,AT1G74070,AT3G48350,AT1G07010,AT5G01920,AT1G25510,AT2G41820,AT2G22980,AT1G68400,AT3G53380,AT1G75640,AT5G50100,AT5G51750,AT3G07990,AT2G33770,AT2G01210,AT5G51560,AT5G58140,AT3G52180,AT2G45340,AT5G06940,AT3G14240,AT3G45780,AT5G65710,AT3G15354,AT2G38195,AT3G49670,AT3G17840,AT1G47128,AT5G53890,AT1G23700,AT1G28390,AT2G23380,AT1G51940,AT1G15000,AT5G01890…
GO:MF	catalytic activity	GO:0003824	false	1.48286e-06	5.8289	9596	1065	530	23352	AT5G53870,AT1G70130,AT5G24420,AT5G39220,AT5G25980,AT4G01130,AT5G14740,AT1G03055,AT1G35420,AT4G39970,AT1G02190,AT5G38520,AT1G64500,AT5G27530,AT3G14440,AT5G10100,AT3G24340,AT1G66830,AT2G26330,AT4G37760,AT5G19470,AT3G56940,AT5G53370,AT1G12790,AT5G19110,AT4G17920,AT4G27440,AT1G64670,AT1G74070,AT3G48350,AT5G17230,AT4G24790,AT3G19480,AT2G37660,AT1G74090,AT2G47180,AT5G19850,AT1G07010,AT4G25100,AT1G27480…
GO:MF	purine ribonucleoside triphosphate binding	GO:0035639	true	2.16651e-06	5.66424	2687	1065	185	23352	AT1G70130,AT3G24340,AT1G66830,AT2G26330,AT4G24790,AT5G01920,AT2G21590,AT2G41820,AT1G68400,AT3G53380,AT1G75640,AT2G01320,AT4G24710,AT3G42670,AT5G35170,AT4G04350,AT2G33770,AT2G01210,AT5G51560,AT5G58140,AT5G43780,AT3G10690,AT2G45340,AT2G13610,AT5G06940,AT3G21250,AT1G27680,AT3G45780,AT1G08520,AT3G10700,AT5G65710,AT3G15354,AT3G49670,AT3G17840,AT2G36400,AT5G53890,AT1G23700,AT1G28390,AT3G07410,AT1G51940…
GO:MF	phosphotransferase activity, alcohol group as acceptor	GO:0016773	false	2.3797e-06	5.62348	1273	1065	104	23352	AT1G70130,AT1G66830,AT2G26330,AT5G01920,AT2G41820,AT1G68400,AT3G53380,AT1G75640,AT2G01210,AT5G51560,AT5G58140,AT5G43780,AT2G45340,AT5G06940,AT3G45780,AT3G10700,AT5G65710,AT3G15354,AT3G49670,AT3G17840,AT5G53890,AT1G23700,AT1G28390,AT1G51940,AT5G01890,AT1G01740,AT4G23740,AT1G34110,AT5G51350,AT1G71830,AT2G26730,AT4G22130,AT3G44200,AT1G09450,AT2G20300,AT4G32710,AT1G19920,AT2G35620,AT2G42880,AT5G63940…
GO:MF	protein kinase activity	GO:0004672	false	2.50486e-06	5.60122	1111	1065	94	23352	AT1G70130,AT1G66830,AT2G26330,AT5G01920,AT2G41820,AT1G68400,AT3G53380,AT1G75640,AT2G01210,AT5G51560,AT5G58140,AT2G45340,AT5G06940,AT3G45780,AT5G65710,AT3G15354,AT3G49670,AT3G17840,AT5G53890,AT1G23700,AT1G28390,AT1G51940,AT5G01890,AT1G01740,AT4G23740,AT1G34110,AT5G51350,AT1G71830,AT2G26730,AT4G22130,AT3G44200,AT1G09450,AT2G20300,AT4G32710,AT2G35620,AT2G42880,AT5G63940,AT1G54510,AT2G44830,AT4G30520…
GO:MF	transferase activity	GO:0016740	false	4.2633e-06	5.37025	4146	1065	261	23352	AT1G70130,AT1G66830,AT2G26330,AT4G17920,AT5G17230,AT4G24790,AT1G74090,AT2G47180,AT1G27480,AT4G25080,AT5G01920,AT3G16520,AT2G21590,AT2G41820,AT2G22980,AT1G68400,AT3G53380,AT1G68470,AT1G75640,AT5G35170,AT2G33770,AT3G63410,AT2G01210,AT4G03210,AT5G51560,AT5G58140,AT5G43780,AT2G45340,AT1G13250,AT5G06940,AT5G54880,AT1G27680,AT3G45780,AT2G02500,AT4G37890,AT3G10700,AT3G50280,AT5G65710,AT1G78370,AT3G15354…
GO:MF	protein binding	GO:0005515	false	5.63937e-06	5.24877	7893	1065	446	23352	AT1G52030,AT2G45190,AT2G24700,AT1G29920,AT3G49970,AT1G71200,AT3G48740,AT5G24930,AT2G47450,AT1G64620,AT1G66830,AT2G26330,AT3G55580,AT5G54270,AT4G15248,AT3G56940,AT3G17040,AT1G12790,AT2G41370,AT4G27440,AT1G68590,AT1G07390,AT3G20820,AT1G26760,AT3G47470,AT5G01530,AT1G14687,AT5G17230,AT3G49760,AT4G25100,AT3G13175,AT3G24520,AT5G44190,AT3G47650,AT4G28660,AT1G64430,AT5G58680,AT2G31920,AT2G30520,AT5G23730…
GO:MF	nucleoside phosphate binding	GO:1901265	false	6.20754e-06	5.20708	3152	1065	208	23352	AT1G70130,AT3G24340,AT1G66830,AT2G26330,AT4G37760,AT4G24790,AT3G19480,AT5G01920,AT2G21590,AT2G41820,AT1G68400,AT3G53380,AT1G75640,AT2G01320,AT4G24710,AT5G15410,AT3G42670,AT5G35170,AT4G04350,AT2G33770,AT2G01210,AT5G51560,AT5G58140,AT5G43780,AT3G10690,AT2G45340,AT2G13610,AT5G06940,AT3G21250,AT1G27680,AT3G45780,AT1G08520,AT3G10700,AT3G15620,AT5G65710,AT3G15354,AT3G49670,AT3G17840,AT2G36400,AT5G53890…
GO:MF	nucleotide binding	GO:0000166	false	6.20754e-06	5.20708	3152	1065	208	23352	AT1G70130,AT3G24340,AT1G66830,AT2G26330,AT4G37760,AT4G24790,AT3G19480,AT5G01920,AT2G21590,AT2G41820,AT1G68400,AT3G53380,AT1G75640,AT2G01320,AT4G24710,AT5G15410,AT3G42670,AT5G35170,AT4G04350,AT2G33770,AT2G01210,AT5G51560,AT5G58140,AT5G43780,AT3G10690,AT2G45340,AT2G13610,AT5G06940,AT3G21250,AT1G27680,AT3G45780,AT1G08520,AT3G10700,AT3G15620,AT5G65710,AT3G15354,AT3G49670,AT3G17840,AT2G36400,AT5G53890…
GO:MF	kinase activity	GO:0016301	false	8.20129e-06	5.08612	1472	1065	114	23352	AT1G70130,AT1G66830,AT2G26330,AT5G01920,AT2G41820,AT1G68400,AT3G53380,AT1G75640,AT5G35170,AT2G01210,AT5G51560,AT5G58140,AT5G43780,AT2G45340,AT5G06940,AT3G45780,AT3G10700,AT5G65710,AT3G15354,AT3G49670,AT3G17840,AT5G53890,AT1G23700,AT1G28390,AT1G51940,AT5G01890,AT1G01740,AT4G23740,AT4G26510,AT1G34110,AT5G51350,AT1G71830,AT2G26730,AT4G22130,AT3G44200,AT1G10760,AT1G09450,AT2G20300,AT4G32710,AT1G19920…
GO:MF	anion binding	GO:0043168	false	8.87316e-06	5.05192	3279	1065	214	23352	AT1G70130,AT2G37870,AT3G24340,AT1G66830,AT2G26330,AT4G37760,AT4G24790,AT5G01920,AT2G21590,AT2G41820,AT1G53520,AT1G68400,AT3G53380,AT1G75640,AT2G01320,AT4G24710,AT5G15410,AT3G42670,AT5G35170,AT4G04350,AT2G33770,AT2G01210,AT5G51560,AT5G58140,AT5G43780,AT3G10690,AT2G45340,AT2G13610,AT5G06940,AT3G21250,AT1G27680,AT3G45780,AT1G08520,AT3G10700,AT3G15620,AT5G65710,AT1G78370,AT3G15354,AT3G29320,AT3G49670…
GO:MF	carbohydrate derivative binding	GO:0097367	false	9.50301e-06	5.02214	2870	1065	192	23352	AT1G70130,AT3G24340,AT1G66830,AT2G26330,AT4G24790,AT5G01920,AT2G21590,AT2G41820,AT1G68400,AT3G53380,AT1G75640,AT2G01320,AT4G24710,AT5G15410,AT3G42670,AT5G35170,AT4G04350,AT2G33770,AT1G21880,AT2G01210,AT5G51560,AT5G58140,AT5G43780,AT3G52180,AT3G10690,AT2G45340,AT2G13610,AT5G06940,AT3G21250,AT1G27680,AT3G45780,AT1G08520,AT3G10700,AT5G65710,AT3G15354,AT3G49670,AT3G17840,AT2G36400,AT5G53890,AT1G23700…
GO:MF	ATP binding	GO:0005524	false	1.10413e-05	4.95698	2416	1065	167	23352	AT1G70130,AT3G24340,AT1G66830,AT2G26330,AT4G24790,AT5G01920,AT2G21590,AT2G41820,AT1G68400,AT3G53380,AT1G75640,AT2G01320,AT4G24710,AT3G42670,AT5G35170,AT4G04350,AT2G33770,AT2G01210,AT5G51560,AT5G58140,AT5G43780,AT3G10690,AT2G45340,AT2G13610,AT5G06940,AT3G21250,AT1G27680,AT3G45780,AT1G08520,AT3G10700,AT5G65710,AT3G15354,AT3G49670,AT3G17840,AT2G36400,AT5G53890,AT1G23700,AT1G28390,AT1G51940,AT5G01890…
GO:MF	ribonucleotide binding	GO:0032553	false	1.36134e-05	4.86603	2828	1065	189	23352	AT1G70130,AT3G24340,AT1G66830,AT2G26330,AT4G24790,AT5G01920,AT2G21590,AT2G41820,AT1G68400,AT3G53380,AT1G75640,AT2G01320,AT4G24710,AT5G15410,AT3G42670,AT5G35170,AT4G04350,AT2G33770,AT2G01210,AT5G51560,AT5G58140,AT5G43780,AT3G10690,AT2G45340,AT2G13610,AT5G06940,AT3G21250,AT1G27680,AT3G45780,AT1G08520,AT3G10700,AT5G65710,AT3G15354,AT3G49670,AT3G17840,AT2G36400,AT5G53890,AT1G23700,AT1G28390,AT3G07410…
GO:MF	purine nucleotide binding	GO:0017076	false	1.52292e-05	4.81732	2944	1065	195	23352	AT1G70130,AT3G24340,AT1G66830,AT2G26330,AT4G24790,AT3G19480,AT5G01920,AT2G21590,AT2G41820,AT1G68400,AT3G53380,AT1G75640,AT2G01320,AT4G24710,AT5G15410,AT3G42670,AT5G35170,AT4G04350,AT2G33770,AT2G01210,AT5G51560,AT5G58140,AT5G43780,AT3G10690,AT2G45340,AT2G13610,AT5G06940,AT3G21250,AT1G27680,AT3G45780,AT1G08520,AT3G10700,AT5G65710,AT3G15354,AT3G49670,AT3G17840,AT2G36400,AT5G53890,AT1G23700,AT1G28390…
GO:MF	purine ribonucleotide binding	GO:0032555	false	1.77398e-05	4.75105	2801	1065	187	23352	AT1G70130,AT3G24340,AT1G66830,AT2G26330,AT4G24790,AT5G01920,AT2G21590,AT2G41820,AT1G68400,AT3G53380,AT1G75640,AT2G01320,AT4G24710,AT5G15410,AT3G42670,AT5G35170,AT4G04350,AT2G33770,AT2G01210,AT5G51560,AT5G58140,AT5G43780,AT3G10690,AT2G45340,AT2G13610,AT5G06940,AT3G21250,AT1G27680,AT3G45780,AT1G08520,AT3G10700,AT5G65710,AT3G15354,AT3G49670,AT3G17840,AT2G36400,AT5G53890,AT1G23700,AT1G28390,AT3G07410…
GO:MF	small molecule binding	GO:0036094	false	1.94313e-05	4.7115	3368	1065	217	23352	AT1G70130,AT3G24340,AT1G66830,AT2G26330,AT4G37760,AT4G24790,AT3G19480,AT5G01920,AT2G33860,AT2G21590,AT2G41820,AT1G68400,AT3G53380,AT1G75640,AT2G01320,AT4G24710,AT5G15410,AT3G42670,AT5G35170,AT4G04350,AT2G33770,AT2G01210,AT5G51560,AT5G58140,AT5G43780,AT3G10690,AT2G45340,AT2G13610,AT5G06940,AT3G21250,AT1G27680,AT3G45780,AT1G08520,AT3G10700,AT3G15620,AT5G65710,AT3G15354,AT3G29320,AT3G49670,AT3G17840…
GO:MF	protein serine kinase activity	GO:0106310	false	2.19936e-05	4.6577	639	1065	61	23352	AT1G70130,AT2G26330,AT5G01920,AT1G68400,AT3G53380,AT2G01210,AT5G58140,AT3G45780,AT5G65710,AT3G49670,AT5G53890,AT1G28390,AT1G01740,AT1G34110,AT1G71830,AT3G44200,AT1G09450,AT2G20300,AT4G32710,AT2G35620,AT2G42880,AT1G54510,AT4G30520,AT2G24230,AT3G07700,AT1G29750,AT1G63700,AT2G01820,AT3G14720,AT2G30980,AT3G48750,AT4G00330,AT5G54590,AT4G26100,AT1G59580,AT2G39660,AT2G43850,AT3G50500,AT1G04440,AT2G23450…
GO:MF	transferase activity, transferring phosphorus-containing groups	GO:0016772	false	2.2023e-05	4.65712	1707	1065	126	23352	AT1G70130,AT1G66830,AT2G26330,AT4G24790,AT5G01920,AT2G21590,AT2G41820,AT1G68400,AT3G53380,AT1G75640,AT5G35170,AT2G01210,AT5G51560,AT5G58140,AT5G43780,AT2G45340,AT5G06940,AT1G27680,AT3G45780,AT2G02500,AT3G10700,AT5G65710,AT3G15354,AT3G49670,AT3G17840,AT5G53890,AT1G63020,AT1G23700,AT1G28390,AT1G51940,AT5G01890,AT1G01740,AT4G23740,AT4G26510,AT1G34110,AT5G51350,AT1G77060,AT1G71830,AT2G26730,AT4G22130…
GO:MF	adenyl nucleotide binding	GO:0030554	false	7.65213e-05	4.11622	2672	1065	177	23352	AT1G70130,AT3G24340,AT1G66830,AT2G26330,AT4G24790,AT3G19480,AT5G01920,AT2G21590,AT2G41820,AT1G68400,AT3G53380,AT1G75640,AT2G01320,AT4G24710,AT5G15410,AT3G42670,AT5G35170,AT4G04350,AT2G33770,AT2G01210,AT5G51560,AT5G58140,AT5G43780,AT3G10690,AT2G45340,AT2G13610,AT5G06940,AT3G21250,AT1G27680,AT3G45780,AT1G08520,AT3G10700,AT5G65710,AT3G15354,AT3G49670,AT3G17840,AT2G36400,AT5G53890,AT1G23700,AT1G28390…
GO:MF	adenyl ribonucleotide binding	GO:0032559	false	9.01544e-05	4.04501	2530	1065	169	23352	AT1G70130,AT3G24340,AT1G66830,AT2G26330,AT4G24790,AT5G01920,AT2G21590,AT2G41820,AT1G68400,AT3G53380,AT1G75640,AT2G01320,AT4G24710,AT5G15410,AT3G42670,AT5G35170,AT4G04350,AT2G33770,AT2G01210,AT5G51560,AT5G58140,AT5G43780,AT3G10690,AT2G45340,AT2G13610,AT5G06940,AT3G21250,AT1G27680,AT3G45780,AT1G08520,AT3G10700,AT5G65710,AT3G15354,AT3G49670,AT3G17840,AT2G36400,AT5G53890,AT1G23700,AT1G28390,AT1G51940…
GO:MF	ion binding	GO:0043167	false	0.000114957	3.93946	6574	1065	374	23352	AT1G70130,AT2G45190,AT2G37870,AT1G29920,AT5G14740,AT1G03055,AT4G39970,AT1G02190,AT5G24930,AT5G06760,AT2G47450,AT3G14440,AT3G24340,AT1G64620,AT1G66830,AT2G26330,AT5G54270,AT4G37760,AT4G15248,AT5G19470,AT3G56940,AT4G17920,AT3G47470,AT5G01530,AT1G14687,AT4G24790,AT2G37660,AT2G47180,AT1G07010,AT4G25100,AT1G14700,AT3G47650,AT3G57670,AT4G15110,AT5G01920,AT2G21590,AT2G41820,AT5G65590,AT1G53520,AT1G68400…
GO:MF	protein serine/threonine kinase activity	GO:0004674	false	0.00330878	2.48033	874	1065	69	23352	AT1G70130,AT2G26330,AT5G01920,AT1G68400,AT3G53380,AT2G01210,AT5G58140,AT3G45780,AT5G65710,AT3G49670,AT5G53890,AT1G28390,AT1G51940,AT1G01740,AT1G34110,AT1G71830,AT3G44200,AT1G09450,AT2G20300,AT4G32710,AT2G35620,AT2G42880,AT1G54510,AT2G44830,AT4G30520,AT3G62220,AT2G24230,AT3G07700,AT1G29750,AT1G63700,AT2G01820,AT3G14720,AT2G30980,AT3G48750,AT4G00330,AT5G54590,AT1G48210,AT4G26100,AT1G59580,AT2G39660…
GO:MF	glycogen (starch) synthase activity	GO:0004373	true	0.0100643	1.99722	5	1065	4	23352	AT1G11720,AT1G32900,AT3G01180,AT5G24300
GO:MF	binding	GO:0005488	false	0.0114331	1.94184	15251	1065	757	23352	AT1G52030,AT1G70130,AT2G45190,AT2G24700,AT3G55170,AT2G47770,AT5G24440,AT2G37870,AT1G29920,AT3G49970,AT5G14740,AT1G14760,AT1G03055,AT1G71200,AT4G39970,AT1G02190,AT1G66230,AT3G48740,AT5G24930,AT5G06760,AT2G47450,AT3G14440,AT2G39310,AT3G24340,AT1G79780,AT1G64620,AT1G66830,AT2G26330,AT3G55580,AT5G54270,AT4G37760,AT4G15248,AT5G19470,AT3G56940,AT1G18650,AT3G17040,AT1G12790,AT2G41370,AT4G17920,AT4G27440…
GO:BP	protein modification process	GO:0036211	true	1.39331e-11	10.856	2927	996	211	23046	AT1G70130,AT3G49970,AT1G66830,AT2G26330,AT2G41370,AT4G17920,AT1G74070,AT5G01920,AT2G30520,AT5G13840,AT2G41820,AT1G68400,AT3G53380,AT1G68470,AT1G75640,AT3G59940,AT3G11520,AT2G33770,AT2G01210,AT5G51560,AT5G58140,AT3G52180,AT2G45340,AT5G06940,AT3G45780,AT5G65710,AT3G15354,AT2G38195,AT3G49670,AT3G17840,AT1G47128,AT5G14660,AT5G53890,AT1G23700,AT1G28390,AT1G76310,AT2G23380,AT1G51940,AT5G01890,AT1G01740…
GO:BP	macromolecule modification	GO:0043412	false	1.22747e-10	9.91099	3292	996	227	23046	AT1G70130,AT3G49970,AT1G66830,AT2G26330,AT2G41370,AT4G17920,AT1G74070,AT5G01920,AT2G30520,AT5G13840,AT2G41820,AT1G68400,AT3G53380,AT1G68470,AT1G75640,AT3G59940,AT3G11520,AT2G33770,AT2G01210,AT5G51560,AT5G58140,AT3G52180,AT2G45340,AT5G06940,AT5G54880,AT3G45780,AT5G65710,AT3G15354,AT2G38195,AT3G49670,AT3G17840,AT1G47128,AT5G14660,AT5G53890,AT1G23700,AT1G28390,AT1G76310,AT2G23380,AT1G51940,AT5G01890…
GO:BP	phosphorus metabolic process	GO:0006793	false	2.60461e-09	8.58426	2284	996	168	23046	AT1G70130,AT5G24420,AT1G66830,AT2G26330,AT5G01920,AT2G41820,AT5G58330,AT1G68400,AT3G53380,AT1G75640,AT3G11520,AT3G44560,AT5G35170,AT2G43900,AT2G01210,AT5G51560,AT5G58140,AT3G52180,AT2G45340,AT5G06940,AT3G45780,AT2G02500,AT3G10700,AT5G65710,AT3G15354,AT3G49670,AT3G17840,AT5G53890,AT1G23700,AT1G28390,AT1G76310,AT1G51940,AT3G18850,AT4G39800,AT5G01890,AT1G01740,AT4G23740,AT4G26510,AT1G34110,AT4G35620…
GO:BP	phosphate-containing compound metabolic process	GO:0006796	false	3.66742e-09	8.43564	2239	996	165	23046	AT1G70130,AT5G24420,AT1G66830,AT2G26330,AT5G01920,AT2G41820,AT5G58330,AT1G68400,AT3G53380,AT1G75640,AT3G11520,AT3G44560,AT5G35170,AT2G43900,AT2G01210,AT5G51560,AT5G58140,AT3G52180,AT2G45340,AT5G06940,AT3G45780,AT2G02500,AT3G10700,AT5G65710,AT3G15354,AT3G49670,AT3G17840,AT5G53890,AT1G23700,AT1G28390,AT1G76310,AT1G51940,AT3G18850,AT4G39800,AT5G01890,AT1G01740,AT4G23740,AT4G26510,AT1G34110,AT4G35620…
GO:BP	protein phosphorylation	GO:0006468	false	8.67078e-08	7.06194	1183	996	100	23046	AT1G70130,AT1G66830,AT2G26330,AT5G01920,AT2G41820,AT1G68400,AT3G53380,AT1G75640,AT3G11520,AT2G01210,AT5G51560,AT5G58140,AT2G45340,AT5G06940,AT3G45780,AT5G65710,AT3G15354,AT3G49670,AT3G17840,AT5G53890,AT1G23700,AT1G28390,AT1G76310,AT1G51940,AT5G01890,AT1G01740,AT4G23740,AT1G34110,AT4G35620,AT5G51350,AT1G71830,AT3G63120,AT2G26730,AT3G18130,AT4G22130,AT3G44200,AT1G09450,AT2G20300,AT4G32710,AT2G35620…
GO:BP	phosphorylation	GO:0016310	false	9.00226e-08	7.04565	1593	996	124	23046	AT1G70130,AT1G66830,AT2G26330,AT5G01920,AT2G41820,AT1G68400,AT3G53380,AT1G75640,AT3G11520,AT5G35170,AT2G01210,AT5G51560,AT5G58140,AT2G45340,AT5G06940,AT3G45780,AT3G10700,AT5G65710,AT3G15354,AT3G49670,AT3G17840,AT5G53890,AT1G23700,AT1G28390,AT1G76310,AT1G51940,AT3G18850,AT5G01890,AT1G01740,AT4G23740,AT4G26510,AT1G34110,AT4G35620,AT5G51350,AT1G71830,AT3G63120,AT2G26730,AT3G18130,AT4G22130,AT3G44200…
GO:BP	metabolic process	GO:0008152	false	1.19718e-07	6.92184	13600	996	683	23046	AT5G53870,AT5G50360,AT1G70130,AT2G45190,AT5G24420,AT3G55170,AT2G47770,AT5G25980,AT4G01130,AT1G29920,AT3G49970,AT3G27250,AT1G14760,AT1G03055,AT1G71200,AT1G02190,AT1G66230,AT5G38520,AT5G27530,AT3G14440,AT5G10100,AT3G24340,AT1G64620,AT1G66830,AT2G26330,AT3G55580,AT5G54270,AT4G37760,AT3G56940,AT5G53370,AT3G17040,AT1G12790,AT5G19110,AT2G41370,AT4G17920,AT4G27440,AT1G64670,AT1G68590,AT1G74070,AT5G08050…
GO:BP	cellular process	GO:0009987	false	1.20271e-07	6.91984	16016	996	780	23046	AT5G53870,AT1G52030,AT5G50360,AT5G17860,AT1G70130,AT2G45190,AT5G24420,AT3G46900,AT3G55170,AT2G47770,AT5G25980,AT1G29920,AT3G27250,AT1G14760,AT1G03055,AT1G71200,AT3G30340,AT1G66230,AT2G47780,AT3G42800,AT3G48740,AT5G38520,AT1G64500,AT2G47450,AT3G14440,AT5G10100,AT3G24340,AT1G64620,AT5G52900,AT1G66830,AT2G26330,AT3G55580,AT5G54270,AT3G56940,AT5G53370,AT3G17040,AT1G12790,AT2G41370,AT4G27440,AT1G64670…
GO:BP	response to stimulus	GO:0050896	false	1.15557e-06	5.9372	6427	996	363	23046	AT3G17520,AT1G52690,AT1G52030,AT1G70130,AT3G16670,AT2G47770,AT2G37870,AT5G25980,AT4G29200,AT1G29920,AT5G14740,AT1G71200,AT1G66230,AT2G47780,AT3G42800,AT5G06760,AT2G47450,AT3G14440,AT1G18250,AT5G52900,AT2G26330,AT3G55580,AT5G54270,AT4G37760,AT3G17040,AT2G46380,AT2G41370,AT4G27440,AT1G64670,AT1G07390,AT5G08050,AT3G47470,AT5G01530,AT3G48350,AT4G24790,AT3G19480,AT3G08770,AT2G47180,AT4G25100,AT1G74730…
GO:BP	plastid organization	GO:0009657	true	1.57263e-06	5.80337	319	996	40	23046	AT1G64500,AT3G56940,AT3G17040,AT1G68590,AT5G08050,AT4G28740,AT1G74730,AT5G44190,AT2G30520,AT5G23730,AT5G24120,AT2G40480,AT2G21280,AT5G58140,AT1G71720,AT3G45780,AT1G45230,AT3G25690,AT5G22640,AT4G31850,AT3G06730,AT5G44650,AT1G03160,AT2G37860,AT4G01150,AT5G42310,AT4G01800,AT5G53860,AT3G19720,AT2G18710,AT5G35220,AT3G24590,AT3G07700,AT5G54600,AT3G63190,AT5G58270,AT5G24020,AT5G55860,AT5G46860,AT1G04770
GO:BP	organic substance metabolic process	GO:0071704	false	3.97707e-06	5.40044	12672	996	636	23046	AT5G50360,AT1G70130,AT2G45190,AT5G24420,AT3G55170,AT2G47770,AT5G25980,AT4G01130,AT3G49970,AT3G27250,AT1G14760,AT1G03055,AT1G71200,AT1G02190,AT1G66230,AT5G38520,AT5G27530,AT3G14440,AT5G10100,AT3G24340,AT1G64620,AT1G66830,AT2G26330,AT3G55580,AT4G37760,AT3G56940,AT5G53370,AT3G17040,AT1G12790,AT5G19110,AT2G41370,AT4G17920,AT4G27440,AT1G64670,AT1G68590,AT1G74070,AT5G08050,AT1G14687,AT3G48350,AT5G17230…
GO:BP	response to abiotic stimulus	GO:0009628	false	1.31218e-05	4.88201	2173	996	148	23046	AT3G17520,AT1G52690,AT2G47770,AT4G29200,AT1G29920,AT1G66230,AT2G47780,AT5G06760,AT2G47450,AT3G14440,AT2G26330,AT3G55580,AT5G54270,AT3G17040,AT1G64670,AT5G08050,AT3G47470,AT5G01530,AT3G19480,AT3G08770,AT2G47180,AT4G25100,AT1G74730,AT3G24520,AT2G30520,AT5G23730,AT2G33860,AT3G61890,AT2G46210,AT2G05620,AT1G73330,AT3G16770,AT2G36990,AT3G50440,AT4G13550,AT5G24120,AT4G30950,AT2G28900,AT5G58140,AT1G71720…
GO:BP	organonitrogen compound metabolic process	GO:1901564	false	2.54518e-05	4.59428	6333	996	351	23046	AT1G70130,AT5G24420,AT3G55170,AT2G47770,AT3G49970,AT1G66230,AT5G38520,AT1G66830,AT2G26330,AT3G56940,AT3G17040,AT5G19110,AT2G41370,AT4G17920,AT4G27440,AT1G68590,AT1G74070,AT3G48350,AT3G19480,AT4G28940,AT5G44190,AT4G25080,AT2G31920,AT5G01920,AT2G30520,AT1G25510,AT5G13840,AT2G41820,AT2G22980,AT5G58330,AT1G68400,AT3G53380,AT1G68470,AT2G46210,AT1G75640,AT5G18380,AT1G73330,AT3G59940,AT3G11520,AT3G44560…
GO:BP	primary metabolic process	GO:0044238	false	4.53604e-05	4.34332	11903	996	597	23046	AT5G50360,AT1G70130,AT2G45190,AT5G24420,AT3G55170,AT5G25980,AT4G01130,AT3G49970,AT3G27250,AT1G14760,AT1G03055,AT1G71200,AT1G02190,AT1G66230,AT5G27530,AT3G14440,AT5G10100,AT1G64620,AT1G66830,AT2G26330,AT4G37760,AT5G53370,AT3G17040,AT1G12790,AT5G19110,AT2G41370,AT4G17920,AT1G64670,AT1G68590,AT1G74070,AT5G08050,AT1G14687,AT3G48350,AT5G17230,AT4G24790,AT3G19480,AT2G47180,AT3G49760,AT1G27480,AT3G24520…
GO:BP	organelle organization	GO:0006996	false	0.000215438	3.66668	1522	996	108	23046	AT2G47780,AT1G64500,AT3G56940,AT3G17040,AT1G12790,AT1G68590,AT5G08050,AT4G28740,AT1G74730,AT5G44190,AT2G33400,AT2G30520,AT5G23730,AT1G75640,AT4G24710,AT5G24120,AT2G40480,AT2G21280,AT5G58140,AT1G71720,AT3G10690,AT3G25980,AT3G45780,AT4G37890,AT3G10525,AT1G45230,AT3G02930,AT3G25690,AT3G25500,AT5G22640,AT1G50490,AT4G31850,AT1G80260,AT3G06730,AT5G44650,AT2G33640,AT1G71830,AT1G03160,AT2G37860,AT1G54030…
GO:BP	starch metabolic process	GO:0005982	true	0.000285971	3.54368	71	996	15	23046	AT2G21590,AT5G04360,AT3G52180,AT1G27680,AT1G11720,AT3G55760,AT5G49190,AT1G32900,AT1G10760,AT2G39930,AT5G51820,AT5G03650,AT3G01180,AT5G24300,AT3G27190
GO:BP	establishment of localization	GO:0051234	true	0.000400659	3.39723	2726	996	170	23046	AT5G17860,AT3G46900,AT2G37870,AT3G30340,AT3G42800,AT3G48740,AT1G64500,AT2G47450,AT2G26330,AT1G64670,AT3G08770,AT1G19970,AT5G59520,AT2G30520,AT3G14810,AT5G15240,AT5G50160,AT2G01320,AT5G15410,AT3G02850,AT1G30840,AT2G40480,AT2G33770,AT1G47670,AT2G28900,AT2G02020,AT5G58140,AT3G08040,AT1G60160,AT2G13610,AT3G21250,AT3G45780,AT1G73590,AT1G27950,AT3G07410,AT5G64080,AT3G23830,AT5G24030,AT3G25690,AT3G51480…
GO:BP	protein transport	GO:0015031	false	0.000531842	3.27422	824	996	67	23046	AT2G47450,AT1G19970,AT2G28900,AT3G07410,AT5G22640,AT5G55220,AT2G33640,AT5G03940,AT1G54030,AT4G01800,AT1G16920,AT1G69420,AT2G18710,AT5G48660,AT1G12930,AT3G20000,AT1G08400,AT5G11150,AT3G46060,Q94A40,AT3G59920,AT3G10640,AT5G46630,AT4G04910,AT3G17440,AT1G04750,AT5G21990,AT5G58060,AT3G56190,AT5G04920,AT4G00355,AT5G61500,AT3G49590,AT2G19830,AT3G09740,AT5G09260,AT4G26750,AT1G76970,AT1G03950,AT1G51740,AT…
GO:BP	vacuolar transport	GO:0007034	false	0.000712677	3.14711	107	996	18	23046	AT3G10640,AT5G04920,AT2G19830,AT5G09260,AT4G26750,AT1G76970,AT1G03950,AT2G45980,AT2G06530,AT5G46860,AT1G26670,AT5G39510,AT4G24690,AT5G45130,AT3G53120,AT4G05000,AT1G73030,AT3G54300
GO:BP	establishment of protein localization	GO:0045184	false	0.000887091	3.05203	836	996	67	23046	AT2G47450,AT1G19970,AT2G28900,AT3G07410,AT5G22640,AT5G55220,AT2G33640,AT5G03940,AT1G54030,AT4G01800,AT1G16920,AT1G69420,AT2G18710,AT5G48660,AT1G12930,AT3G20000,AT1G08400,AT5G11150,AT3G46060,Q94A40,AT3G59920,AT3G10640,AT5G46630,AT4G04910,AT3G17440,AT1G04750,AT5G21990,AT5G58060,AT3G56190,AT5G04920,AT4G00355,AT5G61500,AT3G49590,AT2G19830,AT3G09740,AT5G09260,AT4G26750,AT1G76970,AT1G03950,AT1G51740,AT…
GO:BP	chloroplast organization	GO:0009658	false	0.000916913	3.03767	245	996	29	23046	AT1G64500,AT3G56940,AT5G08050,AT4G28740,AT1G74730,AT5G44190,AT2G30520,AT5G23730,AT5G24120,AT2G40480,AT2G21280,AT5G58140,AT3G45780,AT1G45230,AT3G25690,AT5G22640,AT5G44650,AT2G37860,AT4G01150,AT5G42310,AT4G01800,AT3G19720,AT5G35220,AT3G07700,AT3G63190,AT5G58270,AT5G24020,AT5G55860,AT1G04770
GO:BP	localization	GO:0051179	false	0.000940046	3.02685	2962	996	180	23046	AT5G17860,AT3G46900,AT2G37870,AT3G30340,AT3G42800,AT3G48740,AT1G64500,AT2G47450,AT2G26330,AT1G64670,AT3G08770,AT1G19970,AT5G59520,AT2G30520,AT3G14810,AT5G15240,AT5G50160,AT2G01320,AT5G15410,AT3G02850,AT1G30840,AT2G40480,AT2G33770,AT1G47670,AT2G28900,AT2G02020,AT5G58140,AT3G08040,AT1G60160,AT2G13610,AT3G21250,AT3G45780,AT1G73590,AT1G27950,AT3G07410,AT5G64080,AT3G23830,AT5G24030,AT3G25690,AT3G51480…
GO:BP	hormone-mediated signaling pathway	GO:0009755	false	0.00106216	2.97381	1013	996	77	23046	AT5G25980,AT3G42800,AT5G52900,AT2G41370,AT1G69260,AT2G33860,AT3G59940,AT4G11140,AT3G16770,AT5G60120,AT3G50700,AT2G28550,AT4G34000,AT1G73590,AT1G34390,AT1G13670,AT3G49670,AT2G23380,AT1G51940,AT5G66350,AT5G62920,AT1G01740,AT3G51480,AT1G42540,AT1G34110,AT5G01240,AT1G70940,AT3G28860,AT1G23080,AT1G24625,AT1G71830,AT1G45249,AT5G55540,AT5G37020,AT2G45210,AT2G22670,AT1G78100,AT1G79460,AT1G03840,AT5G17300…
GO:BP	endosome transport via multivesicular body sorting pathway	GO:0032509	false	0.00108327	2.96526	34	996	10	23046	AT3G10640,AT5G04920,AT2G19830,AT5G09260,AT4G26750,AT1G76970,AT1G03950,AT2G06530,AT4G05000,AT1G73030
GO:BP	organic substance transport	GO:0071702	false	0.00131697	2.88043	1451	996	101	23046	AT2G37870,AT3G48740,AT2G47450,AT3G08770,AT1G19970,AT5G15240,AT1G30840,AT1G47670,AT2G28900,AT2G02020,AT3G08040,AT1G27950,AT3G07410,AT5G64080,AT3G23830,AT5G24380,AT5G22640,AT5G55220,AT1G79820,AT5G01240,AT4G31730,AT2G33640,AT5G03940,AT1G54030,AT1G33265,AT4G01800,AT3G27870,AT1G16920,AT5G62890,AT1G69420,AT2G18710,AT5G48660,AT1G12930,AT3G20000,AT5G01500,AT2G47490,AT1G08400,AT5G11150,AT1G54350,AT3G46060…
GO:BP	transport	GO:0006810	false	0.00142068	2.8475	2682	996	165	23046	AT5G17860,AT3G46900,AT2G37870,AT3G30340,AT3G42800,AT3G48740,AT2G47450,AT2G26330,AT1G64670,AT3G08770,AT1G19970,AT5G59520,AT3G14810,AT5G15240,AT5G50160,AT2G01320,AT5G15410,AT3G02850,AT1G30840,AT2G33770,AT1G47670,AT2G28900,AT2G02020,AT5G58140,AT3G08040,AT1G60160,AT2G13610,AT3G21250,AT3G45780,AT1G73590,AT1G27950,AT3G07410,AT5G64080,AT3G23830,AT5G24030,AT3G51480,AT1G42540,AT5G24380,AT5G22640,AT5G55220…
GO:BP	response to oxygen-containing compound	GO:1901700	false	0.00152613	2.81641	1698	996	114	23046	AT3G17520,AT1G52690,AT2G47770,AT5G25980,AT1G29920,AT2G47780,AT5G06760,AT3G14440,AT5G52900,AT5G54270,AT4G37760,AT2G41370,AT1G64670,AT3G08770,AT2G47180,AT4G25100,AT1G69260,AT2G33860,AT1G67590,AT3G61890,AT2G05620,AT1G73330,AT3G16770,AT2G02170,AT2G47400,AT3G50700,AT2G28900,AT3G08040,AT4G34000,AT3G29320,AT2G36400,AT2G23380,AT1G51940,AT5G23310,AT3G23830,AT5G24030,AT5G66350,AT1G01740,AT3G51480,AT1G42540…
GO:BP	cellular response to hormone stimulus	GO:0032870	false	0.00154191	2.81194	1076	996	80	23046	AT5G25980,AT3G42800,AT5G52900,AT2G41370,AT1G69260,AT2G33860,AT3G59940,AT4G11140,AT3G16770,AT5G60120,AT3G50700,AT2G28550,AT4G34000,AT1G73590,AT1G34390,AT1G13670,AT3G49670,AT2G23380,AT1G51940,AT5G66350,AT5G62920,AT1G01740,AT3G51480,AT1G42540,AT1G34110,AT5G01240,AT1G70940,AT3G28860,AT1G23080,AT1G24625,AT1G71830,AT1G45249,AT5G55540,AT3G18130,AT5G37020,AT2G45210,AT2G22670,AT1G78100,AT1G79460,AT1G03840…
GO:BP	vesicle-mediated transport	GO:0016192	false	0.00172359	2.76357	537	996	48	23046	AT5G50375,AT1G16920,AT5G48660,AT1G08400,AT5G11150,AT3G61570,AT3G46060,Q94A40,AT3G59920,AT3G10640,AT5G46630,AT4G04910,AT3G17440,AT1G04750,AT5G58060,AT3G56190,AT5G04920,AT4G27540,AT5G35200,AT4G26100,AT1G80910,AT2G19830,AT3G09740,AT5G09260,AT4G26750,AT1G76970,AT1G03950,AT1G51740,AT1G04440,AT4G27690,AT1G30890,AT3G14090,AT2G45980,AT4G14740,AT2G06530,AT5G46860,AT1G26670,AT3G54840,AT3G58600,AT1G26690,AT…
GO:BP	protein metabolic process	GO:0019538	false	0.00188161	2.72547	5191	996	286	23046	AT1G70130,AT3G55170,AT3G49970,AT1G66830,AT2G26330,AT3G17040,AT5G19110,AT2G41370,AT4G17920,AT1G68590,AT1G74070,AT3G48350,AT2G31920,AT5G01920,AT2G30520,AT1G25510,AT5G13840,AT2G41820,AT2G22980,AT1G68400,AT3G53380,AT1G68470,AT1G75640,AT5G18380,AT1G73330,AT3G59940,AT3G11520,AT5G51750,AT3G07990,AT4G04350,AT2G33770,AT2G01210,AT5G51560,AT5G58140,AT3G52180,AT1G71720,AT2G45340,AT5G06940,AT5G27330,AT3G14240…
GO:BP	multivesicular body sorting pathway	GO:0071985	false	0.00194087	2.712	36	996	10	23046	AT3G10640,AT5G04920,AT2G19830,AT5G09260,AT4G26750,AT1G76970,AT1G03950,AT2G06530,AT4G05000,AT1G73030
GO:BP	nitrogen compound transport	GO:0071705	false	0.00194807	2.7104	1154	996	84	23046	AT2G47450,AT1G19970,AT5G15240,AT1G30840,AT1G47670,AT2G28900,AT2G02020,AT3G07410,AT3G23830,AT5G24380,AT5G22640,AT5G55220,AT5G01240,AT4G31730,AT2G33640,AT5G03940,AT1G54030,AT4G01800,AT1G16920,AT1G69420,AT2G18710,AT5G48660,AT1G12930,AT3G20000,AT5G01500,AT2G47490,AT1G08400,AT5G11150,AT3G46060,AT1G17120,Q94A40,AT3G59920,AT3G10640,AT5G46630,AT4G04910,AT3G17440,AT1G04750,AT5G21990,AT5G58060,AT3G56190,AT…
GO:BP	protein modification by small protein conjugation	GO:0032446	false	0.00245514	2.60992	861	996	67	23046	AT3G49970,AT2G41370,AT4G17920,AT2G30520,AT5G13840,AT3G59940,AT2G33770,AT2G38195,AT1G47128,AT1G50490,AT1G63850,AT5G66560,AT1G78100,AT4G03190,AT3G48150,AT5G50870,AT2G45950,AT1G04510,AT4G24940,AT2G19540,AT5G07270,AT2G28840,AT5G63970,AT4G02570,AT3G49060,AT4G22820,AT1G31350,AT1G15860,AT3G03740,AT4G36800,AT2G36060,AT2G30600,AT1G29340,AT5G56150,AT1G20780,AT5G20910,AT1G75380,AT5G01830,AT1G78420,AT1G75950…
GO:BP	starch biosynthetic process	GO:0019252	false	0.00255709	2.59225	37	996	10	23046	AT2G21590,AT5G04360,AT1G27680,AT1G11720,AT1G32900,AT2G39930,AT5G51820,AT5G03650,AT3G01180,AT5G24300
GO:BP	amylopectin metabolic process	GO:2000896	false	0.00285807	2.54393	7	996	5	23046	AT1G11720,AT2G39930,AT5G03650,AT3G01180,AT5G24300
GO:BP	amylopectin biosynthetic process	GO:0010021	true	0.00285807	2.54393	7	996	5	23046	AT1G11720,AT2G39930,AT5G03650,AT3G01180,AT5G24300
GO:BP	macromolecule localization	GO:0033036	false	0.00291085	2.53598	1293	996	91	23046	AT2G37870,AT2G47450,AT3G08770,AT1G19970,AT2G28900,AT1G27950,AT3G07410,AT5G64080,AT3G23830,AT5G22640,AT5G55220,AT2G33640,AT5G03940,AT1G54030,AT1G33265,AT4G01800,AT1G06490,AT1G03840,AT3G27870,AT1G16920,AT1G69420,AT2G18710,AT5G48660,AT1G12930,AT3G20000,AT5G16550,AT1G08400,AT2G30980,AT5G11150,AT1G10950,AT1G54350,AT5G22350,AT3G46060,Q94A40,AT3G59920,AT3G10640,AT5G46630,AT4G04910,AT3G17440,AT1G04750,AT…
GO:BP	late endosome to vacuole transport	GO:0045324	false	0.00302568	2.51918	46	996	11	23046	AT3G10640,AT5G04920,AT2G19830,AT5G09260,AT4G26750,AT1G76970,AT1G03950,AT2G06530,AT5G46860,AT4G05000,AT1G73030
GO:BP	organic hydroxy compound metabolic process	GO:1901615	true	0.0033424	2.47594	393	996	38	23046	AT1G02190,AT3G14440,AT4G37760,AT1G64670,AT3G50440,AT2G43900,AT3G63410,AT1G11840,AT4G39800,AT4G17600,AT3G23410,AT1G04010,AT5G50375,AT4G26690,AT2G29630,AT4G39120,AT1G20330,AT5G54390,AT3G19820,AT5G49970,AT5G37850,AT4G21534,AT1G73340,AT5G64440,AT3G48780,AT1G33990,AT2G39660,AT3G09810,AT1G20780,AT2G21940,AT1G02860,AT3G09830,AT1G29690,AT1G71710,AT5G63990,AT4G25800,AT1G28380,AT1G80460
GO:BP	cellular response to endogenous stimulus	GO:0071495	false	0.00451094	2.34573	1107	996	80	23046	AT5G25980,AT3G42800,AT5G52900,AT2G41370,AT1G69260,AT2G33860,AT3G59940,AT4G11140,AT3G16770,AT5G60120,AT3G50700,AT2G28550,AT4G34000,AT1G73590,AT1G34390,AT1G13670,AT3G49670,AT2G23380,AT1G51940,AT5G66350,AT5G62920,AT1G01740,AT3G51480,AT1G42540,AT1G34110,AT5G01240,AT1G70940,AT3G28860,AT1G23080,AT1G24625,AT1G71830,AT1G45249,AT5G55540,AT3G18130,AT5G37020,AT2G45210,AT2G22670,AT1G78100,AT1G79460,AT1G03840…
GO:BP	response to stress	GO:0006950	false	0.0049336	2.30684	3985	996	226	23046	AT3G17520,AT1G52690,AT1G52030,AT1G70130,AT3G16670,AT2G47770,AT2G37870,AT5G25980,AT4G29200,AT1G66230,AT2G47780,AT5G06760,AT3G14440,AT1G18250,AT2G26330,AT3G55580,AT5G54270,AT4G37760,AT2G46380,AT2G41370,AT1G64670,AT1G07390,AT3G47470,AT4G24790,AT3G08770,AT2G47180,AT4G25100,AT3G24520,AT5G42100,AT2G33860,AT5G58480,AT1G67590,AT3G61890,AT3G53380,AT2G46210,AT2G05620,AT1G73330,AT5G15410,AT3G16770,AT2G02170…
GO:BP	protein ubiquitination	GO:0016567	false	0.00493728	2.30651	827	996	64	23046	AT3G49970,AT2G41370,AT4G17920,AT2G30520,AT5G13840,AT3G59940,AT2G33770,AT2G38195,AT1G47128,AT1G50490,AT1G63850,AT5G66560,AT1G78100,AT4G03190,AT3G48150,AT5G50870,AT2G45950,AT1G04510,AT2G19540,AT5G07270,AT2G28840,AT5G63970,AT4G02570,AT3G49060,AT4G22820,AT1G31350,AT1G15860,AT3G03740,AT2G36060,AT2G30600,AT1G29340,AT5G56150,AT1G20780,AT5G20910,AT1G75380,AT5G01830,AT1G78420,AT1G75950,AT4G37880,AT1G55530…
GO:BP	cellular response to stimulus	GO:0051716	false	0.00670998	2.17328	3362	996	195	23046	AT1G70130,AT5G25980,AT1G71200,AT3G42800,AT5G52900,AT2G26330,AT3G55580,AT2G41370,AT4G24790,AT4G25100,AT3G24520,AT1G69260,AT2G30520,AT2G33860,AT3G53380,AT2G46210,AT2G05620,AT4G24710,AT5G15410,AT3G59940,AT4G11140,AT3G16770,AT2G36990,AT3G50440,AT5G60120,AT5G24120,AT2G33770,AT3G50700,AT5G58140,AT3G08040,AT3G25980,AT2G28550,AT4G34000,AT3G45780,AT1G73590,AT3G15620,AT1G34390,AT3G15354,AT1G13670,AT3G49670…
GO:BP	protein modification by small protein conjugation or removal	GO:0070647	false	0.00750742	2.12451	961	996	71	23046	AT3G49970,AT2G41370,AT4G17920,AT2G30520,AT5G13840,AT3G59940,AT2G33770,AT2G38195,AT1G47128,AT1G50490,AT1G63850,AT5G66560,AT1G78100,AT4G03190,AT1G17110,AT3G48150,AT5G50870,AT2G45950,AT1G04510,AT5G14250,AT4G24940,AT2G19540,AT5G07270,AT2G28840,AT5G63970,AT4G02570,AT3G49060,AT4G22820,AT1G31350,AT1G15860,AT3G03740,AT4G36800,AT2G36060,AT2G30600,AT4G11860,AT1G29340,AT5G56150,AT1G20780,AT5G20910,AT1G75380…
GO:BP	cell communication	GO:0007154	false	0.00875533	2.05773	2249	996	139	23046	AT1G70130,AT5G25980,AT3G42800,AT5G52900,AT2G41370,AT1G69260,AT5G42100,AT2G30520,AT2G33860,AT3G53380,AT4G24710,AT5G15410,AT3G59940,AT4G11140,AT3G16770,AT5G60120,AT2G33770,AT3G50700,AT5G58140,AT3G08040,AT3G25980,AT2G28550,AT4G34000,AT3G45780,AT1G73590,AT1G34390,AT3G15354,AT1G13670,AT3G49670,AT2G23380,AT1G51940,AT5G66350,AT5G62920,AT1G01740,AT3G51480,AT1G42540,AT1G34110,AT5G01240,AT1G70940,AT3G28860…
GO:BP	protein localization	GO:0008104	false	0.0100107	1.99954	1005	996	73	23046	AT2G47450,AT1G19970,AT2G28900,AT3G07410,AT5G22640,AT5G55220,AT2G33640,AT5G03940,AT1G54030,AT4G01800,AT1G03840,AT1G16920,AT1G69420,AT2G18710,AT5G48660,AT1G12930,AT3G20000,AT1G08400,AT2G30980,AT5G11150,AT1G10950,AT5G22350,AT3G46060,Q94A40,AT3G59920,AT3G10640,AT5G46630,AT4G04910,AT3G17440,AT1G04750,AT5G21990,AT5G58060,AT3G56190,AT5G04920,AT4G00355,AT5G61500,AT3G49590,AT2G19830,AT3G09740,AT5G09260,AT…
GO:BP	cellular response to organic substance	GO:0071310	false	0.0110645	1.95607	1263	996	87	23046	AT5G25980,AT3G42800,AT5G52900,AT2G41370,AT1G69260,AT2G33860,AT3G59940,AT4G11140,AT3G16770,AT5G60120,AT3G50700,AT2G28550,AT4G34000,AT1G73590,AT1G34390,AT1G13670,AT3G49670,AT2G23380,AT1G51940,AT5G66350,AT5G62920,AT1G01740,AT3G51480,AT1G42540,AT1G34110,AT5G01240,AT1G70940,AT3G28860,AT1G23080,AT1G24625,AT1G71830,AT1G45249,AT5G55540,AT3G18130,AT5G37020,AT2G45210,AT2G22670,AT1G78100,AT1G79460,AT1G03840…
GO:BP	response to chemical	GO:0042221	false	0.0116518	1.93361	3105	996	181	23046	AT3G17520,AT1G52690,AT2G47770,AT5G25980,AT1G29920,AT1G71200,AT2G47780,AT3G42800,AT5G06760,AT3G14440,AT5G52900,AT5G54270,AT4G37760,AT2G41370,AT4G27440,AT1G64670,AT3G08770,AT2G47180,AT4G25100,AT1G69260,AT2G33860,AT1G67590,AT3G61890,AT2G05620,AT1G73330,AT3G59940,AT4G11140,AT3G16770,AT2G02170,AT3G50440,AT5G60120,AT5G24120,AT2G47400,AT3G50700,AT2G28900,AT3G08040,AT2G28550,AT4G34000,AT1G73590,AT1G34390…
GO:BP	auxin-activated signaling pathway	GO:0009734	true	0.0135222	1.86895	266	996	28	23046	AT3G42800,AT2G33860,AT1G73590,AT1G34390,AT1G13670,AT5G66350,AT5G01240,AT1G70940,AT3G28860,AT1G23080,AT5G55540,AT5G37020,AT2G45210,AT2G22670,AT5G17300,AT4G03190,AT2G44830,AT1G30330,AT2G33310,AT2G45950,AT4G02570,AT5G01990,AT4G24500,AT1G75950,AT4G14740,AT1G14000,AT2G04550,AT1G56010
GO:BP	endosomal transport	GO:0016197	false	0.0174812	1.75743	75	996	13	23046	AT3G10640,AT5G04920,AT2G19830,AT5G09260,AT4G26750,AT1G76970,AT1G03950,AT4G27690,AT2G06530,AT1G75850,AT4G05000,AT1G73030,AT4G39890
GO:BP	response to hormone	GO:0009725	false	0.0183779	1.7357	1639	996	106	23046	AT2G47770,AT5G25980,AT3G42800,AT5G52900,AT5G54270,AT4G37760,AT2G41370,AT4G27440,AT1G64670,AT2G47180,AT1G69260,AT2G33860,AT3G61890,AT3G59940,AT4G11140,AT3G16770,AT5G60120,AT3G50700,AT2G28900,AT3G08040,AT2G28550,AT4G34000,AT1G73590,AT1G34390,AT1G13670,AT3G49670,AT2G36400,AT2G23380,AT1G51940,AT5G66350,AT5G62920,AT1G01740,AT3G51480,AT1G42540,AT1G34110,AT1G69700,AT5G01240,AT1G70940,AT3G28860,AT1G23080…
GO:BP	response to organic substance	GO:0010033	false	0.0207692	1.68258	2071	996	128	23046	AT2G47770,AT5G25980,AT1G29920,AT3G42800,AT5G52900,AT5G54270,AT4G37760,AT2G41370,AT4G27440,AT1G64670,AT2G47180,AT1G69260,AT2G33860,AT3G61890,AT3G59940,AT4G11140,AT3G16770,AT5G60120,AT2G47400,AT3G50700,AT2G28900,AT3G08040,AT2G28550,AT4G34000,AT1G73590,AT1G34390,AT1G13670,AT3G49670,AT2G36400,AT2G23380,AT1G51940,AT5G66350,AT5G62920,AT1G01740,AT3G51480,AT1G42540,AT1G34110,AT1G69700,AT5G01240,AT1G70940…
GO:BP	cellular macromolecule localization	GO:0070727	false	0.025884	1.58697	1034	996	73	23046	AT2G47450,AT1G19970,AT2G28900,AT3G07410,AT5G22640,AT5G55220,AT2G33640,AT5G03940,AT1G54030,AT4G01800,AT1G03840,AT1G16920,AT1G69420,AT2G18710,AT5G48660,AT1G12930,AT3G20000,AT1G08400,AT2G30980,AT5G11150,AT1G10950,AT5G22350,AT3G46060,Q94A40,AT3G59920,AT3G10640,AT5G46630,AT4G04910,AT3G17440,AT1G04750,AT5G21990,AT5G58060,AT3G56190,AT5G04920,AT4G00355,AT5G61500,AT3G49590,AT2G19830,AT3G09740,AT5G09260,AT…
GO:BP	carbohydrate metabolic process	GO:0005975	false	0.0276684	1.55802	1183	996	81	23046	AT5G24420,AT5G25980,AT5G27530,AT5G10100,AT5G53370,AT2G47180,AT5G42100,AT5G58480,AT2G21590,AT5G65590,AT5G04360,AT5G19730,AT3G14310,AT2G43900,AT2G05790,AT2G47400,AT4G03210,AT3G52180,AT1G13250,AT1G27680,AT3G10700,AT1G11720,AT3G29320,AT2G15440,AT3G18850,AT4G39800,AT3G62110,AT3G06510,AT3G49220,AT3G55760,AT5G49190,AT2G22900,AT1G32900,AT5G65470,AT5G49215,AT3G54920,AT3G43270,AT3G30300,AT5G62220,AT4G34860…
GO:BP	fruit development	GO:0010154	true	0.0324121	1.48929	668	996	52	23046	AT3G17520,AT2G45190,AT3G48740,AT5G06760,AT3G57670,AT4G11140,AT4G04350,AT2G01210,AT1G60160,AT1G73590,AT5G13690,AT5G02030,AT1G05190,AT4G39800,AT1G30490,AT5G24380,AT5G22640,AT5G49190,AT2G22900,AT1G23080,AT1G71830,AT5G67360,AT1G33265,AT5G37020,AT2G20300,AT1G66350,AT2G35620,AT3G03450,AT1G17110,AT5G16750,AT3G63190,AT5G24300,AT2G35020,AT2G38280,AT3G48750,AT4G34460,AT4G02570,AT5G04920,AT4G26500,AT2G47470…
GO:BP	regulation of response to stimulus	GO:0048583	false	0.0349719	1.45628	792	996	59	23046	AT1G66230,AT2G47780,AT3G42800,AT2G46380,AT2G41370,AT1G64670,AT2G33860,AT3G59940,AT5G60120,AT3G50700,AT2G28550,AT1G73590,AT1G78370,AT2G23380,AT1G51940,AT3G23830,AT5G66350,AT3G51480,AT1G42540,AT1G70940,AT3G28860,AT1G23080,AT1G24625,AT1G03160,AT3G18130,AT1G03840,AT1G66350,AT5G08130,AT3G03450,AT2G44830,AT3G48150,AT3G07700,AT4G33780,AT2G19540,AT4G02450,AT5G22330,AT1G13460,AT2G42400,AT2G39660,AT4G26750…
GO:BP	cellular carbohydrate biosynthetic process	GO:0034637	true	0.0370551	1.43115	237	996	25	23046	AT5G10100,AT2G21590,AT5G04360,AT1G27680,AT1G11720,AT2G15440,AT4G39800,AT1G32900,AT5G62220,AT1G06490,AT2G39930,AT5G51820,AT4G39120,AT2G35620,AT5G03650,AT3G21190,AT4G17770,AT3G06550,AT3G01180,AT5G24300,AT5G20280,AT3G46440,AT3G27190,AT1G60140,AT1G23870
GO:BP	response to endogenous stimulus	GO:0009719	false	0.0386723	1.4126	1669	996	106	23046	AT2G47770,AT5G25980,AT3G42800,AT5G52900,AT5G54270,AT4G37760,AT2G41370,AT4G27440,AT1G64670,AT2G47180,AT1G69260,AT2G33860,AT3G61890,AT3G59940,AT4G11140,AT3G16770,AT5G60120,AT3G50700,AT2G28900,AT3G08040,AT2G28550,AT4G34000,AT1G73590,AT1G34390,AT1G13670,AT3G49670,AT2G36400,AT2G23380,AT1G51940,AT5G66350,AT5G62920,AT1G01740,AT3G51480,AT1G42540,AT1G34110,AT1G69700,AT5G01240,AT1G70940,AT3G28860,AT1G23080…
GO:BP	cellular metabolic process	GO:0044237	false	0.0386848	1.41246	11352	996	552	23046	AT5G53870,AT5G50360,AT1G70130,AT2G45190,AT5G24420,AT3G55170,AT2G47770,AT5G25980,AT1G29920,AT3G27250,AT1G14760,AT1G03055,AT1G71200,AT1G66230,AT5G38520,AT3G14440,AT5G10100,AT1G64620,AT1G66830,AT2G26330,AT3G55580,AT5G54270,AT3G56940,AT3G17040,AT1G12790,AT4G27440,AT1G64670,AT1G68590,AT5G08050,AT3G47470,AT5G01530,AT1G14687,AT5G17230,AT4G24790,AT3G19480,AT1G74090,AT3G49760,AT4G25100,AT3G24520,AT4G28940…
GO:BP	cellular response to auxin stimulus	GO:0071365	false	0.0417511	1.37933	283	996	28	23046	AT3G42800,AT2G33860,AT1G73590,AT1G34390,AT1G13670,AT5G66350,AT5G01240,AT1G70940,AT3G28860,AT1G23080,AT5G55540,AT5G37020,AT2G45210,AT2G22670,AT5G17300,AT4G03190,AT2G44830,AT1G30330,AT2G33310,AT2G45950,AT4G02570,AT5G01990,AT4G24500,AT1G75950,AT4G14740,AT1G14000,AT2G04550,AT1G56010
GO:BP	signal transduction	GO:0007165	false	0.0496673	1.30393	2012	996	123	23046	AT1G70130,AT5G25980,AT3G42800,AT5G52900,AT2G41370,AT1G69260,AT2G30520,AT2G33860,AT3G53380,AT4G24710,AT5G15410,AT3G59940,AT4G11140,AT3G16770,AT5G60120,AT3G50700,AT5G58140,AT3G25980,AT2G28550,AT4G34000,AT3G45780,AT1G73590,AT1G34390,AT3G15354,AT1G13670,AT3G49670,AT2G23380,AT1G51940,AT5G66350,AT5G62920,AT1G01740,AT3G51480,AT1G42540,AT1G34110,AT5G01240,AT1G70940,AT3G28860,AT1G23080,AT1G24625,AT1G71830…

## Sheet: Tab. S4b
Table S4b: functional enrichment of the differentially expressed genes (DEGs) detected as upregulated under Cd stress responses in A. halleri root
Bold for top three molecular functions (MFs), biological processes (BPs) or KEGG pathways
source	term_name	term_id	highlighted	adjusted_p_value	negative_log10_of_adjusted_p_value	term_size	query_size	intersection_size	effective_domain_size	intersections
GO:MF	structural molecule activity	GO:0005198	true	1.94114e-22	21.7119	589	759	76	23352	AT3G15980,BAB09205,AT5G56670,AT3G18780,AT1G58983,AAF27099,AT5G10360,P51414,AT5G09490,AT4G14960,AT2G47570,AT1G75600,AT2G05220,AT4G20890,AT1G58684,AT3G53430,AT5G23740,AT1G51060,AAM20524,AT3G58700,AT3G25520,AT2G37190,AT5G46430,AT4G22220,AT4G27230,AT5G48760,AT5G59910,AT2G39460,AT5G10980,AT3G09480,AT3G14600,AT1G50010,AT5G28060,AT3G61111,AT3G53750,AT3G09680,AT5G09810,AT1G52300,AT4G34670,AT5G09510,AT5G5…
GO:MF	structural constituent of ribosome	GO:0003735	false	6.18831e-16	15.2084	423	759	55	23352	AT5G56670,AT1G58983,AT5G10360,P51414,AT5G09490,AT2G47570,AT2G05220,AT1G58684,AT3G53430,AT5G23740,AAM20524,AT3G58700,AT3G25520,AT2G37190,AT5G46430,AT5G48760,AT2G39460,AT3G14600,AT5G28060,AT3G61111,AT3G09680,AT1G52300,AT4G34670,AT5G09510,AT2G27530,AT3G57490,AT3G09630,AT3G02560,AT3G10950,AT3G14290,AT3G53870,AT3G60245,AT5G27850,AT5G45775,AT3G04400,AT3G23390,AT4G31985,AT4G02230,AT5G07090,AT1G07770,AT2…
GO:MF	ribonucleoside triphosphate phosphatase activity	GO:0017111	true	3.53531e-15	14.4516	610	759	66	23352	AT2G45810,AT1G74310,AT1G45000,AT5G49500,AT5G09590,AT4G33370,AT1G50920,AT3G49870,AT4G18800,AT3G02530,AT5G65270,AT1G52280,AT5G28540,AT2G18720,AT5G08690,AT3G09620,AT5G26860,AT4G20890,AT1G53780,AT1G21690,AT5G11170,AT3G62560,AT5G40000,AT2G45030,AT1G70490,AT5G60860,AT5G03520,AT1G07920,AT4G28950,AT5G03340,AT1G15310,AT3G13920,AT1G07810,AT1G07940,AT1G23490,AT2G47250,AT1G07510,AT2G22290,AT5G52882,AT4G17170…
GO:MF	pyrophosphatase activity	GO:0016462	false	1.14253e-14	13.9421	674	759	69	23352	AT2G45810,AT1G74310,AT1G45000,AT5G49500,AT5G09590,AT4G33370,AT1G50920,AT3G49870,AT4G18800,AT3G02530,AT5G65270,AT1G52280,AT5G28540,AT2G18720,AT5G08690,AT3G09620,AT5G26860,AT4G20890,AT1G53780,AT1G21690,AT5G11170,AT3G62560,AT5G40000,AT2G45030,AT1G70490,AT5G60860,AT5G03520,AT1G07920,AT4G28950,AT5G03340,AT1G15310,AT3G13920,AT1G07810,AT1G07940,AT1G23490,AT2G47250,AT1G07510,AT2G22290,AT3G25400,AT5G52882…
GO:MF	hydrolase activity, acting on acid anhydrides, in phosphorus-containing anhydrides	GO:0016818	false	2.11484e-14	13.6747	682	759	69	23352	AT2G45810,AT1G74310,AT1G45000,AT5G49500,AT5G09590,AT4G33370,AT1G50920,AT3G49870,AT4G18800,AT3G02530,AT5G65270,AT1G52280,AT5G28540,AT2G18720,AT5G08690,AT3G09620,AT5G26860,AT4G20890,AT1G53780,AT1G21690,AT5G11170,AT3G62560,AT5G40000,AT2G45030,AT1G70490,AT5G60860,AT5G03520,AT1G07920,AT4G28950,AT5G03340,AT1G15310,AT3G13920,AT1G07810,AT1G07940,AT1G23490,AT2G47250,AT1G07510,AT2G22290,AT3G25400,AT5G52882…
GO:MF	hydrolase activity, acting on acid anhydrides	GO:0016817	false	3.09074e-14	13.5099	687	759	69	23352	AT2G45810,AT1G74310,AT1G45000,AT5G49500,AT5G09590,AT4G33370,AT1G50920,AT3G49870,AT4G18800,AT3G02530,AT5G65270,AT1G52280,AT5G28540,AT2G18720,AT5G08690,AT3G09620,AT5G26860,AT4G20890,AT1G53780,AT1G21690,AT5G11170,AT3G62560,AT5G40000,AT2G45030,AT1G70490,AT5G60860,AT5G03520,AT1G07920,AT4G28950,AT5G03340,AT1G15310,AT3G13920,AT1G07810,AT1G07940,AT1G23490,AT2G47250,AT1G07510,AT2G22290,AT3G25400,AT5G52882…
GO:MF	ion binding	GO:0043167	true	9.31153e-13	12.031	6574	759	313	23352	AT5G13440,AT3G49830,AT1G49860,AT2G45810,AAM97076,AT1G12230,AT1G24180,AAD03482,AT1G74310,AT1G45000,AT3G63230,AT5G55070,AT5G49500,Q9FDW8,AT2G36460,AT3G58500,CAB16820,AT4G26390,AT3G18780,AT3G44740,AT5G09590,AT4G33370,AT1G50920,AT2G41110,AT3G49870,AT1G53165,AT3G28345,AT4G33010,AT1G50370,AT2G30970,AT4G14960,AT1G50480,AT5G38480,CAB87903,AT4G18800,AT4G21710,AT1G56340,AT3G02530,AT5G65270,AT1G52280,AT5G28…
GO:MF	GTP binding	GO:0005525	false	9.46459e-11	10.0239	289	759	38	23352	AT5G49500,AT1G50920,AT3G49870,AT4G14960,AT4G18800,AT5G65270,AT1G52280,AT2G18720,AT4G20890,AT3G62560,AT2G45030,AT1G70490,AT5G60860,AT5G03520,AT1G07920,AT4G28950,AT1G15310,AT1G50010,AT1G07940,AT1G23490,AT2G22290,AT4G17170,AT3G12915,AT1G75840,AT1G04820,AT1G22740,AT3G53610,AT4G35020,AT4G18330,AT1G02430,AT2G21880,AT4G33650,AT1G07930,AT1G33910,AT1G33890,AT1G64740,AT3G61760,AT1G33970
GO:MF	guanyl nucleotide binding	GO:0019001	false	7.73068e-10	9.11178	309	759	38	23352	AT5G49500,AT1G50920,AT3G49870,AT4G14960,AT4G18800,AT5G65270,AT1G52280,AT2G18720,AT4G20890,AT3G62560,AT2G45030,AT1G70490,AT5G60860,AT5G03520,AT1G07920,AT4G28950,AT1G15310,AT1G50010,AT1G07940,AT1G23490,AT2G22290,AT4G17170,AT3G12915,AT1G75840,AT1G04820,AT1G22740,AT3G53610,AT4G35020,AT4G18330,AT1G02430,AT2G21880,AT4G33650,AT1G07930,AT1G33910,AT1G33890,AT1G64740,AT3G61760,AT1G33970
GO:MF	guanyl ribonucleotide binding	GO:0032561	false	7.73068e-10	9.11178	309	759	38	23352	AT5G49500,AT1G50920,AT3G49870,AT4G14960,AT4G18800,AT5G65270,AT1G52280,AT2G18720,AT4G20890,AT3G62560,AT2G45030,AT1G70490,AT5G60860,AT5G03520,AT1G07920,AT4G28950,AT1G15310,AT1G50010,AT1G07940,AT1G23490,AT2G22290,AT4G17170,AT3G12915,AT1G75840,AT1G04820,AT1G22740,AT3G53610,AT4G35020,AT4G18330,AT1G02430,AT2G21880,AT4G33650,AT1G07930,AT1G33910,AT1G33890,AT1G64740,AT3G61760,AT1G33970
GO:MF	GTPase activity	GO:0003924	false	1.04552e-09	8.98067	213	759	31	23352	AT5G49500,AT1G50920,AT3G49870,AT4G18800,AT5G65270,AT1G52280,AT2G18720,AT4G20890,AT3G62560,AT2G45030,AT1G70490,AT5G60860,AT5G03520,AT1G07920,AT4G28950,AT1G15310,AT1G07940,AT1G23490,AT2G22290,AT4G17170,AT3G12915,AT1G75840,AT1G22740,AT3G53610,AT4G35020,AT4G18330,AT1G02430,AT2G21880,AT4G33650,AT1G07930,AT3G61760
GO:MF	anion binding	GO:0043168	false	2.98936e-09	8.52442	3279	759	175	23352	AT3G49830,AT1G49860,AT2G45810,AAM97076,AAD03482,AT1G74310,AT1G45000,AT5G55070,AT5G49500,AT2G36460,CAB16820,AT4G26390,AT3G18780,AT3G44740,AT5G09590,AT4G33370,AT1G50920,AT3G49870,AT1G53165,AT3G28345,AT4G33010,AT2G30970,AT4G14960,AT1G50480,AT5G38480,CAB87903,AT4G18800,AT3G02530,AT5G65270,AT1G52280,AT5G28540,AT2G18720,AT5G08690,AT3G09620,AT5G26860,AT4G20890,AT1G53780,AT1G21690,AT3G59970,AT5G11170,AT1…
GO:MF	purine nucleotide binding	GO:0017076	false	7.86336e-09	8.10439	2944	759	160	23352	AT3G49830,AT2G45810,AAD03482,AT1G74310,AT1G45000,AT5G49500,CAB16820,AT4G26390,AT3G18780,AT3G44740,AT5G09590,AT4G33370,AT1G50920,AT3G49870,AT1G53165,AT3G28345,AT3G29360,AT4G14960,AT1G50480,AT5G38480,CAB87903,AT4G18800,AT3G02530,AT5G65270,AT1G52280,AT5G28540,AT2G18720,AT5G08690,AT3G09620,AT5G26860,AT4G20890,AT1G65930,AT1G16300,AT1G53780,AT1G21690,AT5G11170,AT1G22300,AT2G33840,ATCG00120,AT4G32830,AT…
GO:MF	small molecule binding	GO:0036094	false	7.979e-09	8.09805	3368	759	177	23352	AT3G49830,AT2G45810,AAM97076,AAD03482,AT1G74310,AT1G45000,AT5G55070,AT5G49500,AT2G36460,CAB16820,AT4G26390,AT3G18780,AT3G44740,AT5G09590,AT4G33370,AT1G50920,AT3G49870,AT1G53165,AT3G28345,AT4G33010,AT3G29360,AT2G30970,AT4G14960,AT1G50480,AT5G38480,CAB87903,AT4G18800,AT4G21710,AT3G02530,AT5G65270,AT1G52280,AT5G28540,AT2G18720,AT5G08690,AT3G09620,AT5G26860,AT4G20890,AT1G65930,AT1G16300,AT1G53780,AT1…
GO:MF	nucleotide binding	GO:0000166	false	1.90541e-08	7.72001	3152	759	167	23352	AT3G49830,AT2G45810,AAD03482,AT1G74310,AT1G45000,AT5G49500,CAB16820,AT4G26390,AT3G18780,AT3G44740,AT5G09590,AT4G33370,AT1G50920,AT3G49870,AT1G53165,AT3G28345,AT3G29360,AT4G14960,AT1G50480,AT5G38480,CAB87903,AT4G18800,AT3G02530,AT5G65270,AT1G52280,AT5G28540,AT2G18720,AT5G08690,AT3G09620,AT5G26860,AT4G20890,AT1G65930,AT1G16300,AT1G53780,AT1G21690,AT3G59970,AT5G11170,AT1G22300,AT2G33840,ATCG00120,AT…
GO:MF	nucleoside phosphate binding	GO:1901265	false	1.90541e-08	7.72001	3152	759	167	23352	AT3G49830,AT2G45810,AAD03482,AT1G74310,AT1G45000,AT5G49500,CAB16820,AT4G26390,AT3G18780,AT3G44740,AT5G09590,AT4G33370,AT1G50920,AT3G49870,AT1G53165,AT3G28345,AT3G29360,AT4G14960,AT1G50480,AT5G38480,CAB87903,AT4G18800,AT3G02530,AT5G65270,AT1G52280,AT5G28540,AT2G18720,AT5G08690,AT3G09620,AT5G26860,AT4G20890,AT1G65930,AT1G16300,AT1G53780,AT1G21690,AT3G59970,AT5G11170,AT1G22300,AT2G33840,ATCG00120,AT…
GO:MF	purine ribonucleoside triphosphate binding	GO:0035639	false	4.08431e-08	7.38888	2687	759	147	23352	AT3G49830,AT2G45810,AT1G74310,AT1G45000,AT5G49500,CAB16820,AT4G26390,AT3G18780,AT3G44740,AT5G09590,AT4G33370,AT1G50920,AT3G49870,AT1G53165,AT3G28345,AT4G14960,AT1G50480,AT5G38480,CAB87903,AT4G18800,AT3G02530,AT5G65270,AT1G52280,AT5G28540,AT2G18720,AT5G08690,AT3G09620,AT5G26860,AT4G20890,AT1G53780,AT1G21690,AT5G11170,AT1G22300,AT2G33840,ATCG00120,AT4G32830,AT3G62560,AT5G40000,AT1G78900,AT2G45030,A…
GO:MF	purine ribonucleotide binding	GO:0032555	false	1.16437e-07	6.93391	2801	759	150	23352	AT3G49830,AT2G45810,AAD03482,AT1G74310,AT1G45000,AT5G49500,CAB16820,AT4G26390,AT3G18780,AT3G44740,AT5G09590,AT4G33370,AT1G50920,AT3G49870,AT1G53165,AT3G28345,AT4G14960,AT1G50480,AT5G38480,CAB87903,AT4G18800,AT3G02530,AT5G65270,AT1G52280,AT5G28540,AT2G18720,AT5G08690,AT3G09620,AT5G26860,AT4G20890,AT1G53780,AT1G21690,AT5G11170,AT1G22300,AT2G33840,ATCG00120,AT4G32830,AT3G62560,AT5G40000,AT1G78900,AT…
GO:MF	carbohydrate derivative binding	GO:0097367	false	1.89484e-07	6.72243	2870	759	152	23352	AT3G49830,AT2G45810,AAD03482,AT1G74310,AT1G45000,AT5G49500,CAB16820,AT4G26390,AT3G18780,AT3G44740,AT5G09590,AT4G33370,AT1G50920,AT3G49870,AT1G53165,AT3G28345,AT4G14960,AT1G50480,AT5G38480,CAB87903,AT4G18800,AT4G21710,AT3G02530,AT5G65270,AT1G52280,AT5G28540,AT2G18720,AT5G08690,AT3G09620,AT5G26860,AT4G20890,AT1G53780,AT1G21690,AT5G11170,AT1G22300,AT2G33840,ATCG00120,AT4G32830,AT3G62560,AT5G40000,AT…
GO:MF	ribonucleotide binding	GO:0032553	false	2.29528e-07	6.63916	2828	759	150	23352	AT3G49830,AT2G45810,AAD03482,AT1G74310,AT1G45000,AT5G49500,CAB16820,AT4G26390,AT3G18780,AT3G44740,AT5G09590,AT4G33370,AT1G50920,AT3G49870,AT1G53165,AT3G28345,AT4G14960,AT1G50480,AT5G38480,CAB87903,AT4G18800,AT3G02530,AT5G65270,AT1G52280,AT5G28540,AT2G18720,AT5G08690,AT3G09620,AT5G26860,AT4G20890,AT1G53780,AT1G21690,AT5G11170,AT1G22300,AT2G33840,ATCG00120,AT4G32830,AT3G62560,AT5G40000,AT1G78900,AT…
GO:MF	binding	GO:0005488	false	3.00849e-07	6.52165	15251	759	572	23352	AT5G65430,AT5G13440,AT3G49830,AT1G49860,AT3G15980,AT2G45810,AAM97076,AT1G12230,AT1G24180,AT5G40770,AAD03482,AT1G74310,AT2G22240,AT1G45000,AT3G63230,AT5G55070,AT5G49500,AT4G22380,AAM64316,Q9FDW8,AT2G36460,AT3G58500,AT4G39080,CAB16820,AT5G56670,AT4G26390,AT3G18780,AT3G44740,AT5G09590,AT4G33370,AT3G07590,AT1G50920,AT2G41110,AT3G49870,AT1G53165,AT1G58983,AT3G11380,AAF27099,AT3G28345,AT4G33010,AT5G103…
GO:MF	heterocyclic compound binding	GO:1901363	false	6.58518e-07	6.18143	8473	759	354	23352	AT3G49830,AT2G45810,AAM97076,AAD03482,AT1G74310,AT1G45000,AT5G49500,AT4G22380,Q9FDW8,AT2G36460,CAB16820,AT5G56670,AT4G26390,AT3G18780,AT3G44740,AT5G09590,AT4G33370,AT3G07590,AT1G50920,AT3G49870,AT1G53165,AT1G58983,AT3G28345,AT4G33010,AT5G10360,AT1G26630,P51414,AT3G29360,AT2G30970,AT5G09490,AT4G14960,AT1G19210,AT1G50480,AAG52185,AT3G16380,AT5G38480,CAB87903,AT4G18800,AT4G21710,AT3G02530,AT5G13330,…
GO:MF	organic cyclic compound binding	GO:0097159	false	7.7474e-07	6.11084	8513	759	355	23352	AT3G49830,AT2G45810,AAM97076,AAD03482,AT1G74310,AT1G45000,AT5G55070,AT5G49500,AT4G22380,Q9FDW8,AT2G36460,CAB16820,AT5G56670,AT4G26390,AT3G18780,AT3G44740,AT5G09590,AT4G33370,AT3G07590,AT1G50920,AT3G49870,AT1G53165,AT1G58983,AT3G28345,AT4G33010,AT5G10360,AT1G26630,P51414,AT3G29360,AT2G30970,AT5G09490,AT4G14960,AT1G19210,AT1G50480,AAG52185,AT3G16380,AT5G38480,CAB87903,AT4G18800,AT4G21710,AT3G02530,…
GO:MF	ATP hydrolysis activity	GO:0016887	false	3.72677e-05	4.42867	396	759	35	23352	AT2G45810,AT1G74310,AT1G45000,AT5G09590,AT4G33370,AT3G02530,AT5G28540,AT5G08690,AT3G09620,AT5G26860,AT1G53780,AT1G21690,AT5G11170,AT5G40000,AT5G03340,AT3G13920,AT1G07810,AT2G47250,AT1G07510,AT5G52882,AT5G20000,AT5G42020,AT5G51280,AT5G56030,AT5G52640,AT2G20140,AT1G09080,AT1G09100,AT3G28510,AT3G50930,AT3G28580,AT3G09440,AT1G43910,AT1G16030,AT3G53230
GO:MF	structural constituent of cytoskeleton	GO:0005200	false	0.000152779	3.81594	31	759	9	23352	AT3G18780,AT4G14960,AT4G20890,AT1G50010,AT3G53750,AT5G09810,AT1G04820,AT3G12110,AT1G64740
GO:MF	ATP-dependent activity	GO:0140657	false	0.000389835	3.40912	806	759	53	23352	AT3G49830,AT2G45810,AT1G74310,AT1G45000,AT4G39080,AT5G09590,AT4G33370,AT3G28345,AT3G02530,AT5G28540,AT1G75630,AT5G08690,AT3G09620,AT5G26860,AT1G53780,AT1G21690,AT5G11170,ATCG00120,AT5G40000,AT1G78900,AT5G67630,AT5G03340,AT3G13920,AT1G07810,AT2G47250,AT1G07510,AT5G52882,AT5G20000,AT5G42020,AT5G51280,AT5G56030,AT5G52640,AT1G76030,AT2G20140,AT1G19910,AT1G09080,ATCG00480,AT1G09100,AT3G28510,AT3G50930…
GO:MF	misfolded protein binding	GO:0051787	true	0.00108591	2.96421	21	759	7	23352	AT5G09590,AT5G28540,AT5G42020,AT1G09080,AT3G09440,AT1G16030,AT1G26800
GO:MF	ATP-dependent protein folding chaperone	GO:0140662	false	0.00303435	2.51793	54	759	10	23352	AT5G09590,AT3G02530,AT5G28540,AT5G42020,AT5G56030,AT5G52640,AT1G09080,AT3G09440,AT1G16030,AT2G33210
GO:MF	translation elongation factor activity	GO:0003746	true	0.00363055	2.44003	67	759	11	23352	AT1G26630,AT2G18720,AT2G45030,AT1G07920,AT1G07940,AT3G12915,AT1G13950,AT4G18330,AT1G07930,AT1G30755,AT1G44770
GO:MF	ubiquitin-like protein transferase activity	GO:0019787	true	0.00445894	2.35077	488	759	35	23352	CAB16820,AT1G74870,AT3G60080,AT1G14400,AT1G27530,AT5G63740,AT2G21420,AT3G46620,AT1G01670,AT5G61550,AT1G05880,AT1G66160,AT1G02610,AT2G35930,AT3G52450,AT5G59550,AT4G27470,AT5G65500,AT3G47820,AT3G16720,AT5G22920,AT3G05200,AT2G35000,AT5G38895,AT4G28890,AT5G65200,AT4G20110,AT1G01660,AT1G19310,AT5G27420,AT2G45910,AT5G64660,AT1G26800,AT3G15580,AT5G56340
GO:MF	ATPase activity, coupled to transmembrane movement of ions, rotational mechanism	GO:0044769	false	0.00483862	2.31528	35	759	8	23352	AT4G39080,AT1G75630,AT5G08690,ATCG00120,AT1G78900,AT1G76030,AT1G19910,ATCG00480
GO:MF	ATPase-coupled ion transmembrane transporter activity	GO:0042625	false	0.00483862	2.31528	35	759	8	23352	AT4G39080,AT1G75630,AT5G08690,ATCG00120,AT1G78900,AT1G76030,AT1G19910,ATCG00480
GO:MF	proton-transporting ATPase activity, rotational mechanism	GO:0046961	true	0.00483862	2.31528	35	759	8	23352	AT4G39080,AT1G75630,AT5G08690,ATCG00120,AT1G78900,AT1G76030,AT1G19910,ATCG00480
GO:MF	protein folding chaperone	GO:0044183	false	0.00642964	2.19181	71	759	11	23352	AT5G09590,AT3G02530,AT5G28540,AT5G42020,AT5G56030,AT5G52640,AT1G09080,AT1G76180,AT3G09440,AT1G16030,AT2G33210
GO:MF	unfolded protein binding	GO:0051082	true	0.00680918	2.16691	113	759	14	23352	AT5G09590,AT5G53400,AT1G56340,AT3G02530,AT5G28540,AT4G27890,AT5G42020,AT5G56030,AT5G52640,AT1G09080,AT5G13850,AT3G09440,AT1G54050,AT1G16030
GO:MF	calcium ion binding	GO:0005509	true	0.00720049	2.14264	264	759	23	23352	AT2G41110,AT1G56340,AT3G29000,AT3G56800,Q9LIK5,AT4G27280,AT5G42380,AT1G66400,AT5G37770,AT3G43810,AT1G76650,AT1G21550,AT3G47480,AT1G76180,AT3G25600,AT5G49480,AT4G26470,AT4G20780,AT4G20260,AT2G44310,AT5G24270,AT4G20110,AT2G42590
GO:MF	proteasome-activating activity	GO:0036402	false	0.00874754	2.05811	12	759	5	23352	AT1G45000,AT1G53780,AT5G20000,AT2G20140,AT1G09100
GO:MF	adenyl nucleotide binding	GO:0030554	false	0.0231649	1.63517	2672	759	122	23352	AT3G49830,AT2G45810,AAD03482,AT1G74310,AT1G45000,CAB16820,AT4G26390,AT3G18780,AT3G44740,AT5G09590,AT4G33370,AT1G53165,AT3G28345,AT3G29360,AT1G50480,AT5G38480,CAB87903,AT3G02530,AT5G28540,AT5G08690,AT3G09620,AT5G26860,AT1G65930,AT1G16300,AT1G53780,AT1G21690,AT5G11170,AT1G22300,AT2G33840,ATCG00120,AT4G32830,AT5G40000,AT1G78900,AT3G04120,AT1G49240,AT5G67630,AT1G14400,AT4G20320,ATMG01190,AT1G29880,AT…
GO:MF	proton-transporting ATP synthase activity, rotational mechanism	GO:0046933	true	0.0351559	1.454	24	759	6	23352	AT5G08690,ATCG00120,AT1G78900,ATMG01190,AT2G07698,ATCG00480
GO:MF	ubiquitin-protein transferase activity	GO:0004842	false	0.0357615	1.44658	476	759	32	23352	AT1G74870,AT3G60080,AT1G14400,AT5G63740,AT2G21420,AT3G46620,AT1G01670,AT5G61550,AT1G05880,AT1G66160,AT1G02610,AT2G35930,AT3G52450,AT5G59550,AT4G27470,AT5G65500,AT3G47820,AT3G16720,AT5G22920,AT3G05200,AT2G35000,AT5G38895,AT4G28890,AT5G65200,AT4G20110,AT1G01660,AT1G19310,AT5G27420,AT2G45910,AT5G64660,AT1G26800,AT5G56340
GO:MF	proton channel activity	GO:0015252	false	0.0449923	1.34686	25	759	6	23352	AT5G08690,ATCG00120,AT1G78900,ATMG01190,AT2G07698,ATCG00480
GO:BP	cellular response to hypoxia	GO:0071456	true	9.23002e-26	25.0348	240	756	53	23046	AT1G74310,AT2G36460,AT1G27730,AT5G57510,AT4G24570,AT5G59820,AT4G27280,AT1G19530,AT5G42380,AT4G29780,AT5G20150,AT3G03280,AT2G40000,AT1G15010,AT1G07135,AT1G76650,AT2G46400,AT1G21550,AT1G30720,AT3G02040,AT5G57560,AT4G01360,AT1G72900,AT5G05410,AT1G05880,AT3G56880,AT1G35140,AT4G27470,AT5G25250,AT1G23710,AT2G18670,AT3G10020,AT4G01250,AT3G56400,AT5G20250,AT1G13260,AT1G09070,AT2G01180,AT1G54050,AT1G28760…
GO:BP	cellular response to decreased oxygen levels	GO:0036294	false	1.42494e-25	24.8462	242	756	53	23046	AT1G74310,AT2G36460,AT1G27730,AT5G57510,AT4G24570,AT5G59820,AT4G27280,AT1G19530,AT5G42380,AT4G29780,AT5G20150,AT3G03280,AT2G40000,AT1G15010,AT1G07135,AT1G76650,AT2G46400,AT1G21550,AT1G30720,AT3G02040,AT5G57560,AT4G01360,AT1G72900,AT5G05410,AT1G05880,AT3G56880,AT1G35140,AT4G27470,AT5G25250,AT1G23710,AT2G18670,AT3G10020,AT4G01250,AT3G56400,AT5G20250,AT1G13260,AT1G09070,AT2G01180,AT1G54050,AT1G28760…
GO:BP	cellular response to oxygen levels	GO:0071453	false	1.42494e-25	24.8462	242	756	53	23046	AT1G74310,AT2G36460,AT1G27730,AT5G57510,AT4G24570,AT5G59820,AT4G27280,AT1G19530,AT5G42380,AT4G29780,AT5G20150,AT3G03280,AT2G40000,AT1G15010,AT1G07135,AT1G76650,AT2G46400,AT1G21550,AT1G30720,AT3G02040,AT5G57560,AT4G01360,AT1G72900,AT5G05410,AT1G05880,AT3G56880,AT1G35140,AT4G27470,AT5G25250,AT1G23710,AT2G18670,AT3G10020,AT4G01250,AT3G56400,AT5G20250,AT1G13260,AT1G09070,AT2G01180,AT1G54050,AT1G28760…
GO:BP	response to hypoxia	GO:0001666	false	2.25536e-23	22.6468	267	756	53	23046	AT1G74310,AT2G36460,AT1G27730,AT5G57510,AT4G24570,AT5G59820,AT4G27280,AT1G19530,AT5G42380,AT4G29780,AT5G20150,AT3G03280,AT2G40000,AT1G15010,AT1G07135,AT1G76650,AT2G46400,AT1G21550,AT1G30720,AT3G02040,AT5G57560,AT4G01360,AT1G72900,AT5G05410,AT1G05880,AT3G56880,AT1G35140,AT4G27470,AT5G25250,AT1G23710,AT2G18670,AT3G10020,AT4G01250,AT3G56400,AT5G20250,AT1G13260,AT1G09070,AT2G01180,AT1G54050,AT1G28760…
GO:BP	response to decreased oxygen levels	GO:0036293	false	4.7901e-23	22.3197	271	756	53	23046	AT1G74310,AT2G36460,AT1G27730,AT5G57510,AT4G24570,AT5G59820,AT4G27280,AT1G19530,AT5G42380,AT4G29780,AT5G20150,AT3G03280,AT2G40000,AT1G15010,AT1G07135,AT1G76650,AT2G46400,AT1G21550,AT1G30720,AT3G02040,AT5G57560,AT4G01360,AT1G72900,AT5G05410,AT1G05880,AT3G56880,AT1G35140,AT4G27470,AT5G25250,AT1G23710,AT2G18670,AT3G10020,AT4G01250,AT3G56400,AT5G20250,AT1G13260,AT1G09070,AT2G01180,AT1G54050,AT1G28760…
GO:BP	response to oxygen levels	GO:0070482	false	5.76962e-23	22.2389	272	756	53	23046	AT1G74310,AT2G36460,AT1G27730,AT5G57510,AT4G24570,AT5G59820,AT4G27280,AT1G19530,AT5G42380,AT4G29780,AT5G20150,AT3G03280,AT2G40000,AT1G15010,AT1G07135,AT1G76650,AT2G46400,AT1G21550,AT1G30720,AT3G02040,AT5G57560,AT4G01360,AT1G72900,AT5G05410,AT1G05880,AT3G56880,AT1G35140,AT4G27470,AT5G25250,AT1G23710,AT2G18670,AT3G10020,AT4G01250,AT3G56400,AT5G20250,AT1G13260,AT1G09070,AT2G01180,AT1G54050,AT1G28760…
GO:BP	response to chemical	GO:0042221	false	3.12973e-20	19.5045	3105	756	203	23046	AT5G65430,AT1G49860,AT5G40770,AAD03482,AT1G74310,AT2G22240,AT1G45000,AAM64316,AT2G36460,CAB16820,AT3G18780,AT5G09590,AT4G33010,AT1G19210,AT5G35590,AT5G38480,AT1G56340,AT3G02530,AT5G13330,AT5G28540,AT5G65130,AT5G26860,AT1G65930,AT5G45550,AT5G11170,AT5G51190,AT1G22300,AT1G27730,AT3G04120,AT1G77640,AT1G29460,AT4G28950,AT2G44840,AT5G03340,AT5G57510,AT4G05320,AT4G24570,AT5G59820,AT1G02140,AT1G07810,AT…
GO:BP	response to stimulus	GO:0050896	false	3.6228e-18	17.441	6427	756	330	23046	AT5G65430,AT1G49860,AT5G40770,AAD03482,AT1G74310,AT2G22240,AT1G45000,AT3G63230,AAM64316,AT2G36460,AT3G58500,CAB16820,AT3G18780,AT5G09590,AT2G41110,AT3G49870,AT1G53165,AT4G33010,AT1G26630,AT5G53400,AT4G14960,AT1G19210,AT5G09550,AT5G35590,AT5G38480,CAB87903,AT4G09000,AT1G56340,AT5G17350,AT3G02530,AT5G13330,AT2G44100,AT1G51040,AT5G28540,AT4G10240,AT5G65130,AT5G26860,AT1G65930,AT5G45550,AT1G21690,AT4…
GO:BP	response to stress	GO:0006950	false	1.68268e-16	15.774	3985	756	230	23046	AT5G65430,AT5G40770,AAD03482,AT1G74310,AT2G22240,AT1G45000,AT3G63230,AAM64316,AT2G36460,AT3G58500,AT5G09590,AT3G49870,AT1G53165,AT1G26630,AT5G53400,AT5G38480,CAB87903,AT1G56340,AT5G13330,AT5G28540,AT5G26860,AT1G65930,AT1G21690,AT4G27890,AT3G46000,AT5G51190,ATCG00120,AT1G27730,AT5G40000,AT3G04120,AT1G07370,AT5G22250,AT1G14400,AT3G28340,AT2G44840,AT5G03340,AT5G57510,AT2G39460,AT4G24570,AT5G59820,AT…
GO:BP	cellular response to chemical stimulus	GO:0070887	false	1.52604e-15	14.8164	1789	756	131	23046	AT5G65430,AT1G74310,AT2G36460,AT5G09590,AT1G19210,AT5G38480,AT5G13330,AT5G28540,AT5G65130,AT5G26860,AT5G45550,AT5G51190,AT1G22300,AT1G27730,AT1G77640,AT1G29460,AT4G28950,AT2G44840,AT5G03340,AT5G57510,AT4G24570,AT5G59820,AT1G75080,AT4G27280,AT1G19530,AT1G21910,AT5G42380,AT5G42020,AT4G29780,AT1G06390,AT2G25820,AT3G46620,AT5G20150,AT3G03280,AT2G40000,AT1G15010,AT1G76030,AT3G49960,AT1G07135,AT1G76650…
GO:BP	cellular response to stress	GO:0033554	false	1.80105e-14	13.7445	1294	756	104	23046	AT1G74310,AT2G22240,AT1G45000,AAM64316,AT2G36460,AT5G09590,AT5G38480,AT1G56340,AT5G13330,AT5G28540,AT5G26860,AT1G21690,AT1G27730,AT1G07370,AT1G14400,AT5G03340,AT5G57510,AT4G24570,AT5G59820,AT4G27280,AT3G25400,AT1G19530,AT1G21910,AT5G42380,AT5G42020,AT4G29780,AT5G20150,AT5G56950,AT3G03280,AT2G40000,AT5G56030,AT5G52640,AT1G15010,AT1G21750,AT1G07135,AT1G76650,AT2G46400,AT1G21550,AT1G30720,AT3G02040,…
GO:BP	cellular response to stimulus	GO:0051716	false	2.08274e-14	13.6814	3362	756	198	23046	AT5G65430,AT1G74310,AT2G22240,AT1G45000,AAM64316,AT2G36460,AT5G09590,AT2G41110,AT4G14960,AT1G19210,AT5G09550,AT5G38480,CAB87903,AT4G09000,AT1G56340,AT5G13330,AT2G44100,AT1G51040,AT5G28540,AT5G65130,AT5G26860,AT5G45550,AT1G21690,AT3G56800,AT5G51190,AT1G22300,AT3G55940,AT1G27730,AT1G77640,AT1G07370,AT4G19045,AT1G14400,AT1G29460,AT4G28950,AT2G44840,AT5G03340,AT5G57510,AT4G24570,AT5G59820,AT1G75080,A…
GO:BP	response to abiotic stimulus	GO:0009628	false	7.63067e-13	12.1174	2173	756	142	23046	AT5G65430,AT5G40770,AAD03482,AT1G74310,AT2G36460,AT3G18780,AT5G09590,AT1G53165,AT5G53400,AT4G14960,AT5G38480,CAB87903,AT5G13330,AT4G10240,AT5G51190,ATCG00120,AT1G27730,AT3G04120,AT5G57510,AT2G39460,AT4G24570,AT5G59820,AT5G09810,AT4G27280,AT4G25470,AT1G19530,AT1G21910,AT5G42380,AT4G29780,AT1G06390,AT3G46620,AT5G20150,AT1G02580,AT3G03280,AT2G40000,AT1G35210,AT5G56030,AT5G52640,AT5G37770,AT3G17020,A…
GO:BP	response to organic substance	GO:0010033	true	1.07771e-06	5.9675	2071	756	119	23046	AT5G65430,AT5G40770,AAD03482,AT2G22240,AT1G45000,CAB16820,AT3G18780,AT5G09590,AT1G19210,AT5G38480,AT1G56340,AT5G13330,AT5G28540,AT5G65130,AT5G45550,AT5G51190,AT1G22300,AT1G27730,AT3G04120,AT1G77640,AT1G29460,AT4G28950,AT2G44840,AT5G03340,AT4G05320,AT5G59820,AT1G43040,AT1G75080,AT5G09810,AT4G27280,AT1G21910,AT5G42020,AT1G06390,AT2G25820,AT3G46620,AT2G40000,AT1G73260,AT5G37770,AT1G76030,AT4G33880,A…
GO:BP	defense response to bacterium	GO:0042742	true	9.57799e-06	5.01873	407	756	38	23046	AT5G40770,AT2G22240,AT1G26630,AT1G65930,AT5G22250,AT2G40000,AT1G73260,AT5G56030,AT5G52640,AT1G74710,AT2G27080,AT2G46400,AT3G56710,AT1G17615,AT4G39030,AT3G20600,AT4G23810,AT5G64810,AT4G03960,AT5G59260,AT5G60280,AT2G23810,AT1G18570,AT3G05200,AT1G70690,AT3G56400,AT5G06740,AT2G05940,AT2G44490,AT1G73805,AT5G52830,AT2G24570,AT1G33970,AT2G38470,AT4G12720,AT1G01230,AT5G27420,AT5G45410
GO:BP	response to oxidative stress	GO:0006979	false	1.86532e-05	4.72925	453	756	40	23046	AT5G26860,AT1G27730,AT3G04120,AT3G28340,AT2G39460,AT5G59820,AT5G42380,AT2G40000,AT1G73260,AT5G37770,AT3G49960,AT1G21520,AT1G09080,AT5G17820,AT4G17490,AT5G64100,AT4G11280,AT3G28580,AT5G05410,AT4G23810,AT1G03850,AT5G66390,AT1G52200,AT1G14870,AT1G35910,AT3G10020,AT3G21650,AT5G19875,AT3G56400,AT5G20250,AT3G48360,AT1G54050,AT4G36430,AT5G51890,AT1G68850,AT2G35380,AT4G12720,AT3G29035,AT1G01230,AT3G53990
GO:BP	cellular response to topologically incorrect protein	GO:0035967	false	4.11535e-05	4.38559	68	756	14	23046	AT5G09590,AT5G28540,AT5G03340,AT5G42020,AT1G09080,AT1G33910,AT1G33890,AT4G27470,AT3G09440,AT2G02810,AT1G16030,AT1G19310,AT3G53230,AT1G26800
GO:BP	response to bacterium	GO:0009617	false	5.64497e-05	4.24834	509	756	42	23046	AT5G40770,AT2G22240,AT1G26630,AT1G65930,AT5G22250,AT5G54640,AT2G40000,AT1G73260,AT5G56030,AT5G52640,AT1G74710,AT2G27080,AT2G46400,AT3G56710,AT3G50930,AT1G17615,AT4G39030,AT3G20600,AT4G23810,AT5G64810,AT4G03960,AT4G10500,AT5G59260,AT5G60280,AT2G23810,AT1G18570,AT3G05200,AT1G70690,AT3G56400,AT5G06740,AT2G05940,AT2G44490,AT1G73805,AT5G52830,AT2G24570,AT1G33970,AT2G38470,AT4G12720,AT4G20260,AT1G01230…
GO:BP	response to temperature stimulus	GO:0009266	false	7.10512e-05	4.14843	649	756	49	23046	AT5G65430,AAD03482,AT1G74310,AT5G09590,AT5G53400,AT5G38480,CAB87903,AT5G13330,AT5G51190,ATCG00120,AT1G27730,AT3G04120,AT2G39460,AT5G59820,AT4G25470,AT1G21910,AT5G56030,AT5G52640,AT5G37770,AT3G17020,AT1G74710,AT5G44610,AT4G02270,AT5G43170,ATCG00480,AT1G18740,AT3G61190,AT4G11890,AT1G76180,AT5G57560,AT5G47230,AT1G33910,AT5G05410,AT1G33890,AT1G67970,AT5G06290,AT3G09440,AT2G30250,AT5G20250,AT1G08930,A…
GO:BP	response to topologically incorrect protein	GO:0035966	false	7.33939e-05	4.13434	71	756	14	23046	AT5G09590,AT5G28540,AT5G03340,AT5G42020,AT1G09080,AT1G33910,AT1G33890,AT4G27470,AT3G09440,AT2G02810,AT1G16030,AT1G19310,AT3G53230,AT1G26800
GO:BP	cellular process	GO:0009987	false	0.000266454	3.57438	16016	756	587	23046	AT5G65430,AT5G13440,AT3G49830,AT1G49860,AT3G15980,BAB09205,AT2G45810,AAM97076,AT1G12230,AT1G24180,AT5G40770,AT1G74310,AT2G22240,AT1G45000,AT5G55070,AT5G49500,AT4G22380,AAM64316,AT2G36460,AT3G58500,AT4G39080,AT5G56670,AT4G26390,AT3G18780,AT3G44740,AT5G09590,AT4G33370,AT3G45070,AT3G07590,AT1G50920,AT2G41110,AT3G49870,AT1G53165,AT3G60100,AT1G58983,AAF27099,AT3G28345,AT4G33010,AT5G10360,AT1G26630,P51…
GO:BP	response to inorganic substance	GO:0010035	false	0.000396964	3.40125	791	756	54	23046	AT5G40770,AAD03482,AAM64316,AT4G33010,AT5G35590,AT3G02530,AT5G13330,AT1G65930,AT5G11170,AT1G27730,AT3G04120,AT1G07810,AT5G42380,AT3G46620,AT1G73260,AT5G56030,AT5G37770,AT3G43810,AT1G21750,AT2G46400,AT5G44610,AT4G02270,AT2G37430,AT1G09080,AT3G19580,AT4G11890,AT1G76180,AT5G22890,AT3G28580,AT5G05410,AT4G23810,AT3G56880,AT2G35930,AT3G52450,AT2G14210,AT5G59550,AT1G70170,AT1G08090,AT3G56400,AT2G26530,A…
GO:BP	defense response	GO:0006952	false	0.00074189	3.12966	1694	756	93	23046	AT5G40770,AT2G22240,AAM64316,AT3G58500,AT3G49870,AT1G26630,AT1G65930,AT3G46000,AT5G22250,AT2G44840,AT5G47070,AT2G40000,AT1G73260,AT5G56030,AT5G52640,AT5G37770,AT3G43810,AT1G15010,AT1G74710,AT1G58420,AT2G27080,AT2G46400,AT3G56710,AT5G26170,ATCG00480,AT3G61190,AT4G11890,AT4G17490,AT3G50930,AT5G47230,AT3G52400,AT1G72900,AT3G01080,AT1G20030,AT4G15740,AT1G17615,AT4G11280,AT5G45240,AT2G34600,AT4G39030,…
GO:BP	nucleoside triphosphate metabolic process	GO:0009141	true	0.000792647	3.10092	153	756	19	23046	AAM97076,AT1G24180,AT2G36460,AT4G39080,AT4G26390,AT5G08690,AT1G16300,ATCG00120,AT1G78900,AT3G04120,AT4G20320,ATMG01190,AT5G08570,AT3G25400,AT4G26530,AT4G23900,AT1G76030,AT2G07698,ATCG00480
GO:BP	response to heat	GO:0009408	false	0.000915177	3.03849	266	756	26	23046	AT1G74310,AT5G09590,AT5G53400,AT5G51190,AT3G04120,AT5G59820,AT1G21910,AT5G56030,AT5G52640,AT5G37770,AT4G02270,AT3G61190,AT5G57560,AT1G33910,AT5G05410,AT1G33890,AT1G67970,AT3G09440,AT2G30250,AT5G65790,AT1G54050,AT2G38470,AT1G16030,AT3G53990,AT3G08970,AT2G27580
GO:BP	ribonucleoside triphosphate metabolic process	GO:0009199	false	0.00114427	2.94147	142	756	18	23046	AAM97076,AT1G24180,AT2G36460,AT4G39080,AT4G26390,AT5G08690,AT1G16300,ATCG00120,AT1G78900,AT3G04120,AT4G20320,ATMG01190,AT5G08570,AT4G26530,AT4G23900,AT1G76030,AT2G07698,ATCG00480
GO:BP	purine ribonucleoside triphosphate metabolic process	GO:0009205	false	0.00146801	2.83327	130	756	17	23046	AAM97076,AT1G24180,AT2G36460,AT4G39080,AT4G26390,AT5G08690,AT1G16300,ATCG00120,AT1G78900,AT3G04120,ATMG01190,AT5G08570,AT4G26530,AT4G23900,AT1G76030,AT2G07698,ATCG00480
GO:BP	purine nucleoside triphosphate metabolic process	GO:0009144	false	0.0020259	2.69338	133	756	17	23046	AAM97076,AT1G24180,AT2G36460,AT4G39080,AT4G26390,AT5G08690,AT1G16300,ATCG00120,AT1G78900,AT3G04120,ATMG01190,AT5G08570,AT4G26530,AT4G23900,AT1G76030,AT2G07698,ATCG00480
GO:BP	ATP metabolic process	GO:0046034	false	0.00288561	2.53976	122	756	16	23046	AAM97076,AT1G24180,AT2G36460,AT4G39080,AT4G26390,AT5G08690,AT1G16300,ATCG00120,AT1G78900,AT3G04120,ATMG01190,AT5G08570,AT4G26530,AT1G76030,AT2G07698,ATCG00480
GO:BP	response to metal ion	GO:0010038	true	0.00438729	2.3578	220	756	22	23046	AAD03482,AAM64316,AT4G33010,AT5G35590,AT3G02530,AT1G65930,AT5G11170,AT1G07810,AT5G37770,AT3G43810,AT1G21750,AT5G44610,AT2G37430,AT5G22890,AT1G70170,AT2G26530,AT1G67070,AT2G40370,AT4G20260,AT5G24270,AT1G36370,AT5G27920
GO:BP	protein folding	GO:0006457	false	0.00623819	2.20494	208	756	21	23046	AT5G09590,AT5G53400,AT1G56340,AT3G02530,AT5G28540,AT4G27890,AT5G42020,AT3G55920,AT2G21130,AT5G56030,AT5G52640,AT1G21750,AT2G38730,AT1G09080,AT1G76180,AT3G09440,AT1G54050,AT1G16030,AT2G33210,AT3G53990,AT4G13830
GO:BP	response to endoplasmic reticulum stress	GO:0034976	false	0.00785277	2.10498	117	756	15	23046	AT1G45000,AT1G56340,AT5G28540,AT5G03340,AT5G42020,AT1G21750,AT1G09080,AT1G33910,AT1G33890,AT4G27470,AT2G02810,AT5G42050,AT1G01230,AT1G19310,AT3G53230
GO:BP	response to cold	GO:0009409	false	0.0120554	1.91882	401	756	31	23046	AT5G65430,AAD03482,AT5G38480,CAB87903,AT5G13330,ATCG00120,AT1G27730,AT2G39460,AT5G59820,AT4G25470,AT1G21910,AT5G37770,AT3G17020,AT1G74710,AT5G44610,AT5G43170,ATCG00480,AT1G18740,AT3G61190,AT4G11890,AT1G76180,AT5G57560,AT5G47230,AT5G06290,AT2G30250,AT5G20250,AT1G08930,AT3G48360,AT2G38470,AT4G20260,AT3G53990
GO:BP	cellular response to unfolded protein	GO:0034620	false	0.0149803	1.82448	45	756	9	23046	AT5G09590,AT5G28540,AT5G42020,AT1G09080,AT1G33910,AT1G33890,AT3G09440,AT2G02810,AT1G16030
GO:BP	response to unfolded protein	GO:0006986	false	0.0149803	1.82448	45	756	9	23046	AT5G09590,AT5G28540,AT5G42020,AT1G09080,AT1G33910,AT1G33890,AT3G09440,AT2G02810,AT1G16030
GO:BP	phenylpropanoid metabolic process	GO:0009698	true	0.0150473	1.82254	170	756	18	23046	AT2G36880,AT4G17785,AT4G19370,AT5G42655,AT5G41040,AT3G55230,AT2G28670,AT1G61590,AT5G23190,AT5G66390,AT1G80440,AT5G13580,AT2G39430,AT2G21100,AT2G40370,AT4G22680,AT3G09220,AT2G37360
GO:BP	organonitrogen compound metabolic process	GO:1901564	true	0.0155787	1.80747	6333	756	260	23046	AT3G49830,BAB09205,AT2G45810,AAM97076,AT1G12230,AT1G24180,AT1G74310,AT1G45000,AT5G55070,AAM64316,AT2G34080,AT2G36460,AT3G58500,AT4G39080,CAB16820,AT5G56670,AT4G26390,AT3G44740,AT2G41110,AT1G53165,AT1G58983,AT4G33010,AT5G10360,AT1G26630,P51414,AT3G29360,AT2G30970,AT5G09490,AT1G50480,AT3G16380,AT3G20210,AT5G35590,CAB87903,AT2G47570,AT1G56340,AT1G74870,AT5G28540,AT2G05220,AT2G18720,AT5G08690,AT5G423…
GO:BP	phenylpropanoid biosynthetic process	GO:0009699	false	0.0160492	1.79455	124	756	15	23046	AT2G36880,AT4G17785,AT4G19370,AT5G42655,AT5G41040,AT3G55230,AT2G28670,AT1G61590,AT5G23190,AT5G66390,AT5G13580,AT2G39430,AT2G21100,AT4G22680,AT2G37360
GO:BP	cell-cell junction assembly	GO:0007043	true	0.0190104	1.72101	6	756	4	23046	AT2G27370,AT3G11550,AT1G14160,AT2G36100
GO:BP	catabolic process	GO:0009056	true	0.027083	1.5673	1925	756	96	23046	AT1G49860,BAB09205,AAM97076,AT1G24180,AT1G45000,AT5G55070,AAM64316,AT2G34080,AT2G36460,AT4G26390,AT2G41110,AT4G33010,AT3G20210,AT5G35590,AT1G70710,AT1G56340,AT5G28540,AT2G43020,AT5G26860,AT1G16300,AT1G53780,AT3G55940,AT3G60080,AT5G04970,AT3G04120,AT4G13930,AT5G22250,AT1G14400,AT5G03340,AT4G05320,AT1G02140,AT4G21585,AT2G21420,AT5G08570,AT3G25400,AT5G20000,AT5G42020,AT3G14290,AT4G26530,AT2G40000,AT…
GO:BP	energy derivation by oxidation of organic compounds	GO:0015980	true	0.0281748	1.55014	178	756	18	23046	AT5G13440,AT5G55070,AT3G60100,AT5G17310,AT5G13430,AT5G08690,AT1G65930,AT5G40650,AT1G19530,AT1G22840,AT5G10040,AT2G18450,ATCG00480,AT1G54340,AT3G21720,AT3G10020,AT5G23250,AT2G36220
GO:BP	cellular respiration	GO:0045333	false	0.0370145	1.43163	165	756	17	23046	AT5G13440,AT5G55070,AT3G60100,AT5G13430,AT5G08690,AT1G65930,AT5G40650,AT1G19530,AT1G22840,AT5G10040,AT2G18450,ATCG00480,AT1G54340,AT3G21720,AT3G10020,AT5G23250,AT2G36220
GO:BP	cell junction assembly	GO:0034329	false	0.0432021	1.3645	7	756	4	23046	AT2G27370,AT3G11550,AT1G14160,AT2G36100
GO:BP	response to oxygen-containing compound	GO:1901700	false	0.0434518	1.36199	1698	756	86	23046	AT5G65430,AT5G40770,AAD03482,AT5G13330,AT1G22300,AT1G27730,AT3G04120,AT4G28950,AT4G05320,AT5G59820,AT1G75080,AT1G21910,AT5G42380,AT1G06390,AT3G46620,AT2G40000,AT1G73260,AT5G56030,AT5G37770,AT1G76030,AT2G46400,AT5G44610,AT3G28210,AT4G02270,AT2G37430,AT5G26170,AT1G09080,AT1G35160,AT1G09100,AT3G19580,AT3G61190,AT2G44340,AT5G42910,AT4G11890,AT4G17490,AT1G76180,AT3G50930,AT5G57560,AEC07622,AT4G11280,A…
GO:BP	cellular response to heat	GO:0034605	true	0.0476174	1.32223	77	756	11	23046	AT1G74310,AT1G21910,AT5G56030,AT5G52640,AT1G33910,AT1G33890,AT1G67970,AT2G30250,AT5G65790,AT2G38470,AT3G08970
KEGG	Ribosome	KEGG:03010	false	8.41302e-11	10.075	323	290	52	5083	AT5G56670,AT5G10360,P51414,AT5G09490,AT2G47570,AT2G05220,AT3G53430,AT5G23740,AAM20524,AT3G58700,AT3G25520,AT2G37190,AT5G46430,AT5G48760,AT2G39460,AT3G14600,AT5G28060,AT3G61111,AT3G09680,AT1G52300,AT4G34670,AT5G09510,AT2G27530,AT3G57490,AT3G09630,AT3G02560,AT3G10950,AT3G53870,AT3G60245,AT5G27850,AT5G45775,AT3G04400,AT3G23390,AT4G31985,AT4G02230,AT5G07090,AT1G07770,AT2G31610,AT5G59240,AT3G11940,AT1…
KEGG	Phagosome	KEGG:04145	false	5.29283e-06	5.27631	83	290	19	5083	AT4G39080,AT4G14960,AT1G78720,AT1G56340,AT1G52280,AT1G75630,AT4G20890,AT1G78900,AT4G28950,AT1G50010,AT1G75840,AT1G04820,AT1G22740,AT2G34250,AT1G76030,AT1G19910,AT4G35020,AT2G21880,AT1G64740
KEGG	Proteasome	KEGG:03050	false	0.0245956	1.60914	61	290	11	5083	BAB09205,AT1G45000,AAM64316,AT5G35590,AT1G53780,AT5G20000,AT3G14290,AT2G20140,AT1G09100,AT3G26340,AT1G79210

## Sheet: Tab. S4c
Table S4c: functional enrichment of the differentially expressed genes (DEGs) detected as downregulated under Cd stress responses in A. thaliana root
Bold for top three molecular functions (MFs), biological processes (BPs) or KEGG pathways
source	term_name	term_id	highlighted	adjusted_p_value	negative_log10_of_adjusted_p_value	term_size	query_size	intersection_size	effective_domain_size	intersections
GO:MF	ion binding	GO:0043167	true	1.82025e-17	16.7399	6574	2501	902	23352	AT1G01340,AT1G01350,AT1G01480,AT1G01910,AT1G02270,AT1G02280,AT1G02500,AT1G02860,AT1G02920,AT1G02930,AT1G03090,AT1G03370,AT1G03445,AT1G03850,AT1G04170,AT1G04350,AT1G04400,AT1G04860,AT1G04990,AT1G05160,AT1G05490,AT1G05830,AT1G05890,AT1G06570,AT1G06650,AT1G06840,AT1G07110,AT1G07360,AT1G07650,AT1G08070,AT1G08620,AT1G08830,AT1G09080,AT1G09210,AT1G09970,AT1G10170,AT1G10490,AT1G10600,AT1G10760,AT1G10900…
GO:MF	catalytic activity	GO:0003824	true	3.29085e-14	13.4827	9596	2501	1221	23352	AT1G01480,AT1G01650,AT1G01860,AT1G01910,AT1G02270,AT1G02280,AT1G02300,AT1G02500,AT1G02640,AT1G02660,AT1G02850,AT1G02860,AT1G02920,AT1G02930,AT1G03090,AT1G03150,AT1G03445,AT1G03850,AT1G04170,AT1G04350,AT1G04400,AT1G04860,AT1G04990,AT1G05160,AT1G05490,AT1G05560,AT1G05680,AT1G05830,AT1G05890,AT1G06410,AT1G06440,AT1G06520,AT1G06570,AT1G06650,AT1G06690,AT1G06840,AT1G07110,AT1G07450,AT1G07650,AT1G08200…
GO:MF	small molecule binding	GO:0036094	false	4.63774e-14	13.3337	3368	2501	503	23352	AT1G01340,AT1G01480,AT1G01910,AT1G02280,AT1G02500,AT1G03090,AT1G04170,AT1G04400,AT1G05490,AT1G06840,AT1G07110,AT1G07650,AT1G09080,AT1G09970,AT1G10490,AT1G10760,AT1G10900,AT1G10940,AT1G12010,AT1G12220,AT1G13210,AT1G13640,AT1G14230,AT1G14370,AT1G15500,AT1G15520,AT1G15530,AT1G15890,AT1G16030,AT1G16130,AT1G16280,AT1G17220,AT1G17470,AT1G17960,AT1G18070,AT1G18200,AT1G18270,AT1G18390,AT1G19920,AT1G20950…
GO:MF	anion binding	GO:0043168	false	1.18393e-13	12.9267	3279	2501	490	23352	AT1G01340,AT1G01480,AT1G01910,AT1G02280,AT1G02500,AT1G02920,AT1G02930,AT1G03090,AT1G04170,AT1G04400,AT1G05490,AT1G06840,AT1G07110,AT1G07650,AT1G09080,AT1G09970,AT1G10490,AT1G10760,AT1G10900,AT1G10940,AT1G12010,AT1G12220,AT1G13210,AT1G13640,AT1G14230,AT1G14370,AT1G15500,AT1G15520,AT1G15530,AT1G15890,AT1G16030,AT1G16130,AT1G16280,AT1G17170,AT1G17220,AT1G17470,AT1G17960,AT1G18070,AT1G18200,AT1G18270…
GO:MF	nucleoside phosphate binding	GO:1901265	false	2.12952e-12	11.6717	3152	2501	468	23352	AT1G01340,AT1G01910,AT1G02280,AT1G02500,AT1G03090,AT1G04170,AT1G04400,AT1G05490,AT1G06840,AT1G07110,AT1G07650,AT1G09080,AT1G09970,AT1G10490,AT1G10760,AT1G10900,AT1G10940,AT1G12220,AT1G13210,AT1G13640,AT1G14230,AT1G14370,AT1G15500,AT1G15520,AT1G15530,AT1G15890,AT1G16030,AT1G16130,AT1G16280,AT1G17220,AT1G17470,AT1G17960,AT1G18070,AT1G18200,AT1G18270,AT1G18390,AT1G19920,AT1G20950,AT1G21160,AT1G21210…
GO:MF	nucleotide binding	GO:0000166	false	2.12952e-12	11.6717	3152	2501	468	23352	AT1G01340,AT1G01910,AT1G02280,AT1G02500,AT1G03090,AT1G04170,AT1G04400,AT1G05490,AT1G06840,AT1G07110,AT1G07650,AT1G09080,AT1G09970,AT1G10490,AT1G10760,AT1G10900,AT1G10940,AT1G12220,AT1G13210,AT1G13640,AT1G14230,AT1G14370,AT1G15500,AT1G15520,AT1G15530,AT1G15890,AT1G16030,AT1G16130,AT1G16280,AT1G17220,AT1G17470,AT1G17960,AT1G18070,AT1G18200,AT1G18270,AT1G18390,AT1G19920,AT1G20950,AT1G21160,AT1G21210…
GO:MF	ribonucleotide binding	GO:0032553	false	5.35401e-09	8.27132	2828	2501	410	23352	AT1G01340,AT1G01910,AT1G02280,AT1G02500,AT1G03090,AT1G04170,AT1G04400,AT1G05490,AT1G06840,AT1G07110,AT1G07650,AT1G09080,AT1G09970,AT1G10490,AT1G10760,AT1G10900,AT1G10940,AT1G12220,AT1G13210,AT1G13640,AT1G14230,AT1G14370,AT1G15500,AT1G15520,AT1G15530,AT1G15890,AT1G16030,AT1G16130,AT1G16280,AT1G17220,AT1G17470,AT1G17960,AT1G18070,AT1G18200,AT1G18270,AT1G18390,AT1G19920,AT1G20950,AT1G21160,AT1G21210…
GO:MF	carbohydrate derivative binding	GO:0097367	false	5.65153e-09	8.24783	2870	2501	415	23352	AT1G01340,AT1G01910,AT1G02280,AT1G02500,AT1G02930,AT1G03090,AT1G04170,AT1G04400,AT1G05490,AT1G06840,AT1G07110,AT1G07650,AT1G09080,AT1G09970,AT1G10490,AT1G10760,AT1G10900,AT1G10940,AT1G12220,AT1G13210,AT1G13640,AT1G14230,AT1G14370,AT1G15500,AT1G15520,AT1G15530,AT1G15890,AT1G16030,AT1G16130,AT1G16280,AT1G17220,AT1G17470,AT1G17960,AT1G18070,AT1G18200,AT1G18270,AT1G18390,AT1G19920,AT1G20950,AT1G21160…
GO:MF	purine ribonucleotide binding	GO:0032555	false	7.1212e-09	8.14745	2801	2501	406	23352	AT1G01340,AT1G01910,AT1G02280,AT1G02500,AT1G03090,AT1G04170,AT1G04400,AT1G05490,AT1G06840,AT1G07110,AT1G07650,AT1G09080,AT1G09970,AT1G10490,AT1G10760,AT1G10900,AT1G10940,AT1G12220,AT1G13210,AT1G13640,AT1G14230,AT1G14370,AT1G15500,AT1G15520,AT1G15530,AT1G15890,AT1G16030,AT1G16130,AT1G16280,AT1G17220,AT1G17470,AT1G17960,AT1G18070,AT1G18200,AT1G18270,AT1G18390,AT1G19920,AT1G20950,AT1G21160,AT1G21210…
GO:MF	purine nucleotide binding	GO:0017076	false	1.26894e-08	7.89656	2944	2501	422	23352	AT1G01340,AT1G01910,AT1G02280,AT1G02500,AT1G03090,AT1G04170,AT1G04400,AT1G05490,AT1G06840,AT1G07110,AT1G07650,AT1G09080,AT1G09970,AT1G10490,AT1G10760,AT1G10900,AT1G10940,AT1G12220,AT1G13210,AT1G13640,AT1G14230,AT1G14370,AT1G15500,AT1G15520,AT1G15530,AT1G15890,AT1G16030,AT1G16130,AT1G16280,AT1G17220,AT1G17470,AT1G17960,AT1G18070,AT1G18200,AT1G18270,AT1G18390,AT1G19920,AT1G20950,AT1G21160,AT1G21210…
GO:MF	adenyl ribonucleotide binding	GO:0032559	false	1.45221e-08	7.83797	2530	2501	371	23352	AT1G01340,AT1G01910,AT1G02500,AT1G03090,AT1G04400,AT1G05490,AT1G06840,AT1G07110,AT1G07650,AT1G09080,AT1G09970,AT1G10490,AT1G10760,AT1G10900,AT1G10940,AT1G12220,AT1G13210,AT1G13640,AT1G14230,AT1G14370,AT1G15500,AT1G15520,AT1G15530,AT1G15890,AT1G16030,AT1G16130,AT1G16280,AT1G17960,AT1G18270,AT1G18390,AT1G19920,AT1G20950,AT1G21210,AT1G24030,AT1G25390,AT1G26270,AT1G27770,AT1G27940,AT1G28210,AT1G30410…
GO:MF	adenyl nucleotide binding	GO:0030554	false	2.63116e-08	7.57985	2672	2501	387	23352	AT1G01340,AT1G01910,AT1G02500,AT1G03090,AT1G04400,AT1G05490,AT1G06840,AT1G07110,AT1G07650,AT1G09080,AT1G09970,AT1G10490,AT1G10760,AT1G10900,AT1G10940,AT1G12220,AT1G13210,AT1G13640,AT1G14230,AT1G14370,AT1G15500,AT1G15520,AT1G15530,AT1G15890,AT1G16030,AT1G16130,AT1G16280,AT1G17960,AT1G18270,AT1G18390,AT1G19920,AT1G20950,AT1G21210,AT1G24030,AT1G25390,AT1G26270,AT1G27770,AT1G27940,AT1G28210,AT1G30410…
GO:MF	purine ribonucleoside triphosphate binding	GO:0035639	false	2.6204e-07	6.58163	2687	2501	383	23352	AT1G01910,AT1G02280,AT1G02500,AT1G03090,AT1G04170,AT1G04400,AT1G05490,AT1G06840,AT1G07110,AT1G07650,AT1G09080,AT1G09970,AT1G10490,AT1G10760,AT1G10900,AT1G10940,AT1G12220,AT1G13210,AT1G13640,AT1G14230,AT1G14370,AT1G15500,AT1G15520,AT1G15530,AT1G15890,AT1G16030,AT1G16130,AT1G16280,AT1G17220,AT1G17470,AT1G17960,AT1G18070,AT1G18200,AT1G18270,AT1G18390,AT1G19920,AT1G20950,AT1G21160,AT1G21210,AT1G24030…
GO:MF	FAD binding	GO:0071949	false	5.11575e-07	6.29109	80	2501	29	23352	AT1G04400,AT1G24340,AT1G26380,AT1G26390,AT1G26420,AT1G30720,AT1G30730,AT1G37130,AT1G77760,AT2G27150,AT2G29720,AT2G35690,AT2G38960,AT2G44160,AT2G46750,AT3G15620,AT3G30775,AT3G43600,AT3G59970,AT4G15760,AT4G16760,AT4G20840,AT4G20860,AT4G34890,AT4G36400,AT4G38540,AT5G20960,AT5G24850,AT5G65110
GO:MF	ATP binding	GO:0005524	false	5.58867e-07	6.25269	2416	2501	348	23352	AT1G01910,AT1G02500,AT1G03090,AT1G04400,AT1G05490,AT1G06840,AT1G07110,AT1G07650,AT1G09080,AT1G09970,AT1G10490,AT1G10760,AT1G10900,AT1G10940,AT1G12220,AT1G13210,AT1G13640,AT1G14230,AT1G14370,AT1G15500,AT1G15520,AT1G15530,AT1G15890,AT1G16030,AT1G16130,AT1G16280,AT1G17960,AT1G18270,AT1G18390,AT1G19920,AT1G20950,AT1G21210,AT1G24030,AT1G25390,AT1G26270,AT1G27770,AT1G27940,AT1G28210,AT1G30410,AT1G30680…
GO:MF	binding	GO:0005488	false	7.07712e-07	6.15014	15251	2501	1765	23352	AT1G01340,AT1G01350,AT1G01480,AT1G01720,AT1G01820,AT1G01860,AT1G01910,AT1G02060,AT1G02220,AT1G02270,AT1G02280,AT1G02500,AT1G02860,AT1G02920,AT1G02930,AT1G03090,AT1G03290,AT1G03370,AT1G03445,AT1G03470,AT1G03760,AT1G03850,AT1G04140,AT1G04170,AT1G04350,AT1G04400,AT1G04500,AT1G04780,AT1G04860,AT1G04990,AT1G05160,AT1G05340,AT1G05410,AT1G05490,AT1G05560,AT1G05830,AT1G05890,AT1G06150,AT1G06440,AT1G06570…
GO:MF	catalytic activity, acting on a protein	GO:0140096	false	3.95044e-05	4.40335	2804	2501	383	23352	AT1G01650,AT1G02300,AT1G02860,AT1G03445,AT1G03850,AT1G04860,AT1G05830,AT1G05890,AT1G06840,AT1G07650,AT1G08210,AT1G08620,AT1G09970,AT1G10600,AT1G10940,AT1G11530,AT1G12750,AT1G13270,AT1G14370,AT1G15530,AT1G16130,AT1G17550,AT1G18280,AT1G18390,AT1G18480,AT1G18660,AT1G21210,AT1G21410,AT1G22280,AT1G22500,AT1G24030,AT1G25390,AT1G28120,AT1G30810,AT1G31420,AT1G32940,AT1G34110,AT1G34210,AT1G34300,AT1G35580…
GO:MF	metal ion binding	GO:0046872	false	0.000119369	3.92311	3814	2501	498	23352	AT1G01350,AT1G02270,AT1G02280,AT1G02500,AT1G02860,AT1G02920,AT1G02930,AT1G03090,AT1G03370,AT1G03445,AT1G03850,AT1G04350,AT1G04400,AT1G04860,AT1G04990,AT1G05160,AT1G05830,AT1G05890,AT1G06570,AT1G06650,AT1G07360,AT1G08070,AT1G08620,AT1G08830,AT1G09210,AT1G10170,AT1G10600,AT1G10760,AT1G12010,AT1G12230,AT1G12310,AT1G12520,AT1G13210,AT1G13270,AT1G13560,AT1G14740,AT1G15510,AT1G16130,AT1G17020,AT1G17550…
GO:MF	protein serine kinase activity	GO:0106310	false	0.000123113	3.9097	639	2501	110	23352	AT1G06840,AT1G07650,AT1G09970,AT1G10940,AT1G14370,AT1G15530,AT1G16130,AT1G21210,AT1G24030,AT1G25390,AT1G31420,AT1G34110,AT1G34210,AT1G34300,AT1G35670,AT1G45160,AT1G48490,AT1G49160,AT1G51820,AT1G51880,AT1G51890,AT1G53430,AT1G53440,AT1G60940,AT1G61360,AT1G61380,AT1G63500,AT1G66920,AT1G66980,AT1G67720,AT1G68690,AT1G70530,AT1G72710,AT1G74360,AT1G78290,AT1G79680,AT2G02220,AT2G05940,AT2G11520,AT2G17520…
GO:MF	cation binding	GO:0043169	false	0.00017849	3.74839	3835	2501	499	23352	AT1G01350,AT1G02270,AT1G02280,AT1G02500,AT1G02860,AT1G02920,AT1G02930,AT1G03090,AT1G03370,AT1G03445,AT1G03850,AT1G04350,AT1G04400,AT1G04860,AT1G04990,AT1G05160,AT1G05830,AT1G05890,AT1G06570,AT1G06650,AT1G07360,AT1G08070,AT1G08620,AT1G08830,AT1G09210,AT1G10170,AT1G10600,AT1G10760,AT1G12010,AT1G12230,AT1G12310,AT1G12520,AT1G13210,AT1G13270,AT1G13560,AT1G14740,AT1G15510,AT1G16130,AT1G17020,AT1G17550…
GO:MF	phosphotransferase activity, alcohol group as acceptor	GO:0016773	false	0.000412647	3.38442	1273	2501	190	23352	AT1G06840,AT1G07110,AT1G07650,AT1G09970,AT1G10900,AT1G10940,AT1G13640,AT1G14370,AT1G15530,AT1G16130,AT1G18390,AT1G19920,AT1G20950,AT1G21210,AT1G24030,AT1G25390,AT1G26270,AT1G31420,AT1G32440,AT1G34110,AT1G34210,AT1G34260,AT1G34300,AT1G35670,AT1G45160,AT1G48490,AT1G49160,AT1G49180,AT1G51620,AT1G51790,AT1G51800,AT1G51820,AT1G51880,AT1G51890,AT1G53090,AT1G53430,AT1G53440,AT1G56145,AT1G60940,AT1G61360…
GO:MF	heterocyclic compound binding	GO:1901363	false	0.000668567	3.17485	8473	2501	1014	23352	AT1G01340,AT1G01350,AT1G01480,AT1G01720,AT1G01860,AT1G01910,AT1G02220,AT1G02280,AT1G02500,AT1G02930,AT1G03090,AT1G03290,AT1G04170,AT1G04400,AT1G04990,AT1G05160,AT1G05490,AT1G06150,AT1G06440,AT1G06840,AT1G07110,AT1G07130,AT1G07360,AT1G07650,AT1G07660,AT1G09080,AT1G09230,AT1G09760,AT1G09970,AT1G10170,AT1G10490,AT1G10760,AT1G10900,AT1G10940,AT1G12010,AT1G12220,AT1G12780,AT1G13210,AT1G13260,AT1G13270…
GO:MF	organic cyclic compound binding	GO:0097159	false	0.000724193	3.14015	8513	2501	1018	23352	AT1G01340,AT1G01350,AT1G01480,AT1G01720,AT1G01860,AT1G01910,AT1G02220,AT1G02280,AT1G02500,AT1G02930,AT1G03090,AT1G03290,AT1G04170,AT1G04400,AT1G04990,AT1G05160,AT1G05490,AT1G06150,AT1G06440,AT1G06840,AT1G07110,AT1G07130,AT1G07360,AT1G07650,AT1G07660,AT1G09080,AT1G09230,AT1G09760,AT1G09970,AT1G10170,AT1G10490,AT1G10760,AT1G10900,AT1G10940,AT1G12010,AT1G12220,AT1G12780,AT1G13210,AT1G13260,AT1G13270…
GO:MF	kinase activity	GO:0016301	false	0.000850538	3.07031	1472	2501	213	23352	AT1G06840,AT1G07110,AT1G07650,AT1G09970,AT1G10760,AT1G10900,AT1G10940,AT1G13640,AT1G14370,AT1G15530,AT1G16130,AT1G18270,AT1G18390,AT1G19600,AT1G19920,AT1G20950,AT1G21210,AT1G21920,AT1G24030,AT1G25390,AT1G26270,AT1G31420,AT1G32440,AT1G33560,AT1G34110,AT1G34210,AT1G34260,AT1G34300,AT1G35670,AT1G45160,AT1G48490,AT1G49160,AT1G49180,AT1G51620,AT1G51790,AT1G51800,AT1G51820,AT1G51880,AT1G51890,AT1G53090…
GO:MF	flavin adenine dinucleotide binding	GO:0050660	false	0.00147591	2.83094	165	2501	38	23352	AT1G04400,AT1G24340,AT1G26380,AT1G26390,AT1G26420,AT1G30720,AT1G30730,AT1G37130,AT1G48030,AT1G55930,AT1G63340,AT1G77760,AT2G18450,AT2G27150,AT2G29720,AT2G35690,AT2G38960,AT2G44160,AT2G46750,AT3G06810,AT3G13070,AT3G15620,AT3G30775,AT3G43600,AT3G45300,AT3G51840,AT3G59970,AT4G15760,AT4G16760,AT4G20840,AT4G20860,AT4G34890,AT4G36400,AT4G38540,AT5G20960,AT5G24160,AT5G24850,AT5G65110
GO:MF	xenobiotic transmembrane transporter activity	GO:0042910	true	0.00176145	2.75413	73	2501	22	23352	AT1G30410,AT1G33100,AT1G33110,AT1G58340,AT1G64820,AT1G66760,AT1G66780,AT1G71140,AT2G04040,AT2G04050,AT2G04070,AT2G34360,AT2G47000,AT3G13080,AT3G21250,AT3G21690,AT3G23560,AT3G26590,AT4G23030,AT5G52050,AT5G52450,AT5G65380
GO:MF	transferase activity	GO:0016740	false	0.00293582	2.53227	4146	2501	524	23352	AT1G01480,AT1G01860,AT1G02500,AT1G02860,AT1G02920,AT1G02930,AT1G03150,AT1G05560,AT1G05680,AT1G05830,AT1G05890,AT1G06410,AT1G06520,AT1G06840,AT1G07110,AT1G07650,AT1G08510,AT1G09970,AT1G10060,AT1G10070,AT1G10170,AT1G10490,AT1G10760,AT1G10900,AT1G10940,AT1G11755,AT1G12230,AT1G13560,AT1G13640,AT1G14370,AT1G15040,AT1G15530,AT1G16130,AT1G16445,AT1G16460,AT1G16650,AT1G17170,AT1G18270,AT1G18390,AT1G18500…
GO:MF	protein kinase activity	GO:0004672	false	0.00641787	2.19261	1111	2501	163	23352	AT1G06840,AT1G07650,AT1G09970,AT1G10940,AT1G14370,AT1G15530,AT1G16130,AT1G18390,AT1G21210,AT1G24030,AT1G25390,AT1G31420,AT1G34110,AT1G34210,AT1G34300,AT1G35670,AT1G45160,AT1G48490,AT1G49160,AT1G49180,AT1G51620,AT1G51790,AT1G51800,AT1G51820,AT1G51880,AT1G51890,AT1G53090,AT1G53430,AT1G53440,AT1G56145,AT1G60940,AT1G61360,AT1G61380,AT1G63500,AT1G66340,AT1G66920,AT1G66980,AT1G67470,AT1G67720,AT1G68690…
GO:MF	protein serine/threonine kinase activity	GO:0004674	false	0.00679454	2.16784	874	2501	133	23352	AT1G06840,AT1G07650,AT1G09970,AT1G10940,AT1G14370,AT1G15530,AT1G16130,AT1G21210,AT1G24030,AT1G25390,AT1G31420,AT1G34110,AT1G34210,AT1G34300,AT1G35670,AT1G45160,AT1G48490,AT1G49160,AT1G49180,AT1G51800,AT1G51820,AT1G51880,AT1G51890,AT1G53430,AT1G53440,AT1G56145,AT1G60940,AT1G61360,AT1G61380,AT1G63500,AT1G66920,AT1G66980,AT1G67720,AT1G68690,AT1G70530,AT1G72710,AT1G74360,AT1G78290,AT1G79680,AT2G02220…
GO:MF	oxidoreductase activity	GO:0016491	false	0.00846073	2.07259	1606	2501	223	23352	AT1G03850,AT1G04350,AT1G05160,AT1G06570,AT1G06650,AT1G06690,AT1G07450,AT1G08550,AT1G08620,AT1G08830,AT1G09500,AT1G12010,AT1G15710,AT1G17020,AT1G18270,AT1G18490,AT1G19400,AT1G20630,AT1G21400,AT1G22430,AT1G23020,AT1G24340,AT1G26380,AT1G26390,AT1G26420,AT1G30720,AT1G30730,AT1G30810,AT1G31600,AT1G31800,AT1G32350,AT1G35190,AT1G37130,AT1G44090,AT1G48030,AT1G50430,AT1G51720,AT1G52590,AT1G53670,AT1G54100…
GO:MF	transferase activity, transferring phosphorus-containing groups	GO:0016772	false	0.0319156	1.496	1707	2501	231	23352	AT1G06840,AT1G07110,AT1G07650,AT1G09970,AT1G10760,AT1G10900,AT1G10940,AT1G13560,AT1G13640,AT1G14370,AT1G15530,AT1G16130,AT1G18270,AT1G18390,AT1G19600,AT1G19920,AT1G20950,AT1G21210,AT1G21920,AT1G24030,AT1G25390,AT1G26270,AT1G30680,AT1G31420,AT1G32440,AT1G33560,AT1G34110,AT1G34210,AT1G34260,AT1G34300,AT1G35670,AT1G45160,AT1G48490,AT1G49160,AT1G49180,AT1G51620,AT1G51790,AT1G51800,AT1G51820,AT1G51880…
GO:MF	NAD+ ADP-ribosyltransferase activity	GO:0003950	true	0.0358249	1.44582	9	2501	6	23352	AT1G23550,AT1G32230,AT2G35510,AT3G47720,AT4G02390,AT5G62520
GO:MF	protein binding	GO:0005515	false	0.0412297	1.38479	7893	2501	929	23352	AT1G01340,AT1G01480,AT1G01720,AT1G01820,AT1G01910,AT1G02060,AT1G02220,AT1G02280,AT1G02500,AT1G02860,AT1G03445,AT1G03470,AT1G03850,AT1G04140,AT1G04400,AT1G04500,AT1G04780,AT1G05340,AT1G05410,AT1G05560,AT1G05830,AT1G05890,AT1G06150,AT1G06570,AT1G06710,AT1G06840,AT1G07130,AT1G07360,AT1G07650,AT1G07660,AT1G07740,AT1G08070,AT1G08550,AT1G08620,AT1G08800,AT1G08830,AT1G09080,AT1G09210,AT1G09230,AT1G09270…
GO:MF	transition metal ion binding	GO:0046914	false	0.0442887	1.35371	1259	2501	176	23352	AT1G02920,AT1G02930,AT1G03090,AT1G04860,AT1G05160,AT1G06570,AT1G08070,AT1G08830,AT1G10170,AT1G12230,AT1G12520,AT1G15510,AT1G18270,AT1G18480,AT1G18490,AT1G20630,AT1G22430,AT1G22450,AT1G23730,AT1G28050,AT1G29710,AT1G31800,AT1G37130,AT1G47400,AT1G48030,AT1G48420,AT1G49240,AT1G50370,AT1G53030,AT1G53720,AT1G58180,AT1G60650,AT1G62810,AT1G64900,AT1G64930,AT1G64950,AT1G65930,AT1G66540,AT1G66650,AT1G67070…
GO:BP	response to stimulus	GO:0050896	true	2.19339e-61	60.6589	6427	2355	1019	23046	AT1G01340,AT1G01720,AT1G01860,AT1G02300,AT1G02660,AT1G02860,AT1G02920,AT1G02930,AT1G03445,AT1G03850,AT1G04400,AT1G05560,AT1G05680,AT1G06410,AT1G07110,AT1G07135,AT1G07360,AT1G07650,AT1G07660,AT1G08550,AT1G08830,AT1G08930,AT1G09080,AT1G09210,AT1G09270,AT1G09415,AT1G09970,AT1G10140,AT1G10170,AT1G10760,AT1G10940,AT1G11210,AT1G11310,AT1G11755,AT1G11960,AT1G12010,AT1G12220,AT1G12520,AT1G13260,AT1G13300…
GO:BP	response to chemical	GO:0042221	false	4.04178e-47	46.3934	3105	2355	569	23046	AT1G01340,AT1G01720,AT1G02860,AT1G02920,AT1G02930,AT1G03445,AT1G03850,AT1G04400,AT1G05560,AT1G05680,AT1G07135,AT1G07660,AT1G08830,AT1G08930,AT1G09080,AT1G09210,AT1G10140,AT1G10170,AT1G11755,AT1G12010,AT1G12520,AT1G13260,AT1G13300,AT1G14360,AT1G15010,AT1G15380,AT1G15520,AT1G15670,AT1G15750,AT1G16030,AT1G16510,AT1G17170,AT1G17550,AT1G18300,AT1G18490,AT1G18570,AT1G19020,AT1G19530,AT1G20630,AT1G20950…
GO:BP	response to stress	GO:0006950	false	3.37481e-43	42.4718	3985	2355	670	23046	AT1G01720,AT1G01860,AT1G02300,AT1G02660,AT1G02860,AT1G02920,AT1G02930,AT1G03850,AT1G04400,AT1G05680,AT1G06410,AT1G07135,AT1G07360,AT1G07660,AT1G08550,AT1G08830,AT1G08930,AT1G09080,AT1G09210,AT1G09415,AT1G09970,AT1G10140,AT1G10170,AT1G10760,AT1G10940,AT1G11210,AT1G11310,AT1G11755,AT1G11960,AT1G12010,AT1G12220,AT1G12520,AT1G13260,AT1G13300,AT1G13340,AT1G13609,AT1G14360,AT1G14370,AT1G14870,AT1G15010…
GO:BP	cellular response to hypoxia	GO:0071456	false	3.23926e-35	34.4896	240	2355	101	23046	AT1G01720,AT1G07135,AT1G10140,AT1G13260,AT1G13300,AT1G15010,AT1G18300,AT1G18490,AT1G19020,AT1G19530,AT1G21550,AT1G23710,AT1G26270,AT1G26380,AT1G27730,AT1G30720,AT1G32928,AT1G33055,AT1G35140,AT1G55810,AT1G61340,AT1G63090,AT1G66180,AT1G68620,AT1G68690,AT1G69890,AT1G72900,AT1G76600,AT1G76640,AT1G76680,AT1G77120,AT2G14247,AT2G15890,AT2G16060,AT2G23270,AT2G25735,AT2G26560,AT2G36220,AT2G36460,AT2G36800…
GO:BP	response to hypoxia	GO:0001666	false	4.53774e-35	34.3432	267	2355	107	23046	AT1G01720,AT1G07135,AT1G10140,AT1G13260,AT1G13300,AT1G15010,AT1G18300,AT1G18490,AT1G19020,AT1G19530,AT1G21550,AT1G23710,AT1G26270,AT1G26380,AT1G27730,AT1G30720,AT1G32928,AT1G33055,AT1G35140,AT1G55810,AT1G61340,AT1G63090,AT1G66180,AT1G68620,AT1G68690,AT1G69890,AT1G72330,AT1G72900,AT1G76600,AT1G76640,AT1G76680,AT1G77120,AT2G14247,AT2G15890,AT2G16060,AT2G23270,AT2G25735,AT2G26560,AT2G31810,AT2G36220…
GO:BP	cellular response to oxygen levels	GO:0071453	false	7.79184e-35	34.1084	242	2355	101	23046	AT1G01720,AT1G07135,AT1G10140,AT1G13260,AT1G13300,AT1G15010,AT1G18300,AT1G18490,AT1G19020,AT1G19530,AT1G21550,AT1G23710,AT1G26270,AT1G26380,AT1G27730,AT1G30720,AT1G32928,AT1G33055,AT1G35140,AT1G55810,AT1G61340,AT1G63090,AT1G66180,AT1G68620,AT1G68690,AT1G69890,AT1G72900,AT1G76600,AT1G76640,AT1G76680,AT1G77120,AT2G14247,AT2G15890,AT2G16060,AT2G23270,AT2G25735,AT2G26560,AT2G36220,AT2G36460,AT2G36800…
GO:BP	cellular response to decreased oxygen levels	GO:0036294	false	7.79184e-35	34.1084	242	2355	101	23046	AT1G01720,AT1G07135,AT1G10140,AT1G13260,AT1G13300,AT1G15010,AT1G18300,AT1G18490,AT1G19020,AT1G19530,AT1G21550,AT1G23710,AT1G26270,AT1G26380,AT1G27730,AT1G30720,AT1G32928,AT1G33055,AT1G35140,AT1G55810,AT1G61340,AT1G63090,AT1G66180,AT1G68620,AT1G68690,AT1G69890,AT1G72900,AT1G76600,AT1G76640,AT1G76680,AT1G77120,AT2G14247,AT2G15890,AT2G16060,AT2G23270,AT2G25735,AT2G26560,AT2G36220,AT2G36460,AT2G36800…
GO:BP	response to decreased oxygen levels	GO:0036293	false	2.27661e-34	33.6427	271	2355	107	23046	AT1G01720,AT1G07135,AT1G10140,AT1G13260,AT1G13300,AT1G15010,AT1G18300,AT1G18490,AT1G19020,AT1G19530,AT1G21550,AT1G23710,AT1G26270,AT1G26380,AT1G27730,AT1G30720,AT1G32928,AT1G33055,AT1G35140,AT1G55810,AT1G61340,AT1G63090,AT1G66180,AT1G68620,AT1G68690,AT1G69890,AT1G72330,AT1G72900,AT1G76600,AT1G76640,AT1G76680,AT1G77120,AT2G14247,AT2G15890,AT2G16060,AT2G23270,AT2G25735,AT2G26560,AT2G31810,AT2G36220…
GO:BP	response to oxygen levels	GO:0070482	false	3.38664e-34	33.4702	272	2355	107	23046	AT1G01720,AT1G07135,AT1G10140,AT1G13260,AT1G13300,AT1G15010,AT1G18300,AT1G18490,AT1G19020,AT1G19530,AT1G21550,AT1G23710,AT1G26270,AT1G26380,AT1G27730,AT1G30720,AT1G32928,AT1G33055,AT1G35140,AT1G55810,AT1G61340,AT1G63090,AT1G66180,AT1G68620,AT1G68690,AT1G69890,AT1G72330,AT1G72900,AT1G76600,AT1G76640,AT1G76680,AT1G77120,AT2G14247,AT2G15890,AT2G16060,AT2G23270,AT2G25735,AT2G26560,AT2G31810,AT2G36220…
GO:BP	response to abiotic stimulus	GO:0009628	false	7.83245e-34	33.1061	2173	2355	407	23046	AT1G01720,AT1G01860,AT1G02930,AT1G04400,AT1G05680,AT1G07135,AT1G07660,AT1G08550,AT1G08830,AT1G08930,AT1G10140,AT1G10170,AT1G10760,AT1G10940,AT1G11755,AT1G13260,AT1G13300,AT1G15010,AT1G15380,AT1G15510,AT1G15520,AT1G16030,AT1G16510,AT1G18300,AT1G18490,AT1G19020,AT1G19115,AT1G19530,AT1G20630,AT1G21400,AT1G21550,AT1G21910,AT1G21920,AT1G22280,AT1G22500,AT1G22730,AT1G22770,AT1G22810,AT1G22890,AT1G23710…
GO:BP	cellular response to stimulus	GO:0051716	false	2.32698e-32	31.6332	3362	2355	557	23046	AT1G01720,AT1G02860,AT1G03445,AT1G04400,AT1G05680,AT1G06410,AT1G07135,AT1G08830,AT1G09080,AT1G09210,AT1G10140,AT1G10940,AT1G11755,AT1G11960,AT1G12010,AT1G12220,AT1G12520,AT1G13260,AT1G13300,AT1G14360,AT1G15010,AT1G15380,AT1G15520,AT1G15530,AT1G15670,AT1G15750,AT1G16030,AT1G16130,AT1G16510,AT1G17550,AT1G18300,AT1G18340,AT1G18490,AT1G18570,AT1G19020,AT1G19530,AT1G19920,AT1G20630,AT1G21210,AT1G21400…
GO:BP	response to oxygen-containing compound	GO:1901700	false	4.94048e-30	29.3062	1698	2355	331	23046	AT1G01720,AT1G02860,AT1G02930,AT1G03445,AT1G04400,AT1G05560,AT1G05680,AT1G07660,AT1G08830,AT1G08930,AT1G09080,AT1G11755,AT1G12010,AT1G12520,AT1G13260,AT1G13300,AT1G15380,AT1G15520,AT1G15750,AT1G17550,AT1G18570,AT1G19020,AT1G20630,AT1G20950,AT1G21400,AT1G21910,AT1G22430,AT1G22500,AT1G22770,AT1G22810,AT1G22890,AT1G24190,AT1G27510,AT1G27730,AT1G28330,AT1G28520,AT1G29290,AT1G32230,AT1G33560,AT1G34210…
GO:BP	cellular response to chemical stimulus	GO:0070887	false	2.61239e-26	25.583	1789	2355	333	23046	AT1G01720,AT1G03445,AT1G05680,AT1G07135,AT1G08830,AT1G09080,AT1G10140,AT1G11755,AT1G12010,AT1G12520,AT1G13260,AT1G13300,AT1G14360,AT1G15010,AT1G15380,AT1G15520,AT1G15670,AT1G15750,AT1G16030,AT1G16510,AT1G17550,AT1G18300,AT1G18490,AT1G19020,AT1G19530,AT1G20630,AT1G21410,AT1G21550,AT1G21910,AT1G22430,AT1G22810,AT1G23710,AT1G26270,AT1G26380,AT1G27510,AT1G27730,AT1G30720,AT1G32230,AT1G32870,AT1G32928…
GO:BP	cellular response to stress	GO:0033554	false	6.59198e-25	24.181	1294	2355	260	23046	AT1G01720,AT1G02860,AT1G05680,AT1G06410,AT1G07135,AT1G08830,AT1G09080,AT1G09210,AT1G10140,AT1G11755,AT1G12220,AT1G12520,AT1G13260,AT1G13300,AT1G14360,AT1G15010,AT1G15520,AT1G16030,AT1G18300,AT1G18340,AT1G18490,AT1G18570,AT1G19020,AT1G19530,AT1G19920,AT1G20630,AT1G21400,AT1G21550,AT1G21910,AT1G22810,AT1G23710,AT1G23870,AT1G26270,AT1G26380,AT1G27510,AT1G27730,AT1G29290,AT1G30000,AT1G30720,AT1G32870…
GO:BP	cellular process	GO:0009987	false	3.02446e-22	21.5194	16016	2355	1849	23046	AT1G01340,AT1G01350,AT1G01480,AT1G01720,AT1G01820,AT1G01860,AT1G01910,AT1G02220,AT1G02270,AT1G02280,AT1G02500,AT1G02640,AT1G02860,AT1G02920,AT1G02930,AT1G03090,AT1G03280,AT1G03290,AT1G03445,AT1G03760,AT1G03850,AT1G04140,AT1G04170,AT1G04200,AT1G04400,AT1G04860,AT1G04990,AT1G05160,AT1G05300,AT1G05490,AT1G05560,AT1G05575,AT1G05680,AT1G05830,AT1G05890,AT1G06150,AT1G06410,AT1G06470,AT1G06520,AT1G06570…
GO:BP	response to organic substance	GO:0010033	false	8.42771e-21	20.0743	2071	2355	353	23046	AT1G01720,AT1G02860,AT1G03445,AT1G03850,AT1G04400,AT1G05560,AT1G05680,AT1G08830,AT1G08930,AT1G09080,AT1G09210,AT1G11755,AT1G12010,AT1G13260,AT1G13300,AT1G14360,AT1G15380,AT1G15520,AT1G15670,AT1G15750,AT1G16030,AT1G16510,AT1G17550,AT1G18570,AT1G20630,AT1G20950,AT1G21400,AT1G21410,AT1G21910,AT1G22430,AT1G22500,AT1G22810,AT1G24190,AT1G27730,AT1G28330,AT1G29290,AT1G30000,AT1G32230,AT1G33600,AT1G34110…
GO:BP	response to external stimulus	GO:0009605	false	1.33844e-18	17.8734	1968	2355	332	23046	AT1G01340,AT1G02660,AT1G02860,AT1G02920,AT1G03850,AT1G04400,AT1G05680,AT1G07110,AT1G07360,AT1G07650,AT1G08830,AT1G09270,AT1G09415,AT1G09970,AT1G10170,AT1G10760,AT1G11310,AT1G11960,AT1G12220,AT1G13300,AT1G13609,AT1G14370,AT1G15010,AT1G15520,AT1G15530,AT1G16030,AT1G16510,AT1G18570,AT1G19020,AT1G19115,AT1G19920,AT1G20630,AT1G21400,AT1G22500,AT1G22730,AT1G22770,AT1G22810,AT1G22890,AT1G23730,AT1G25275…
GO:BP	response to oxidative stress	GO:0006979	false	2.40634e-15	14.6186	453	2355	110	23046	AT1G02930,AT1G03850,AT1G05680,AT1G08830,AT1G09080,AT1G09970,AT1G11210,AT1G12520,AT1G13340,AT1G14870,AT1G15380,AT1G15520,AT1G19020,AT1G20630,AT1G21520,AT1G22770,AT1G27510,AT1G27730,AT1G32230,AT1G32870,AT1G35580,AT1G53540,AT1G53670,AT1G56560,AT1G65970,AT1G72060,AT1G73260,AT1G73680,AT1G77120,AT1G78410,AT2G04795,AT2G16500,AT2G18170,AT2G19810,AT2G25080,AT2G28190,AT2G35510,AT2G40000,AT2G43790,AT3G01090…
GO:BP	cell communication	GO:0007154	false	9.07428e-14	13.0422	2249	2355	349	23046	AT1G01720,AT1G03445,AT1G04400,AT1G05680,AT1G09080,AT1G10940,AT1G11755,AT1G11960,AT1G13260,AT1G13300,AT1G14360,AT1G15380,AT1G15520,AT1G15530,AT1G15670,AT1G15750,AT1G16130,AT1G16510,AT1G17550,AT1G19920,AT1G20630,AT1G21210,AT1G21400,AT1G21410,AT1G21910,AT1G22280,AT1G22770,AT1G22810,AT1G28520,AT1G29290,AT1G32230,AT1G32870,AT1G33600,AT1G34110,AT1G34210,AT1G35160,AT1G35350,AT1G35670,AT1G36060,AT1G43160…
GO:BP	response to external biotic stimulus	GO:0043207	false	7.99446e-13	12.0972	1488	2355	249	23046	AT1G01340,AT1G02660,AT1G02860,AT1G02920,AT1G03850,AT1G04400,AT1G07360,AT1G08830,AT1G09270,AT1G09415,AT1G09970,AT1G10170,AT1G10760,AT1G11310,AT1G11960,AT1G12220,AT1G13609,AT1G14370,AT1G15010,AT1G15520,AT1G15530,AT1G16030,AT1G18570,AT1G19020,AT1G22810,AT1G22890,AT1G25275,AT1G28190,AT1G32230,AT1G33560,AT1G33970,AT1G37130,AT1G44350,AT1G49050,AT1G51090,AT1G51800,AT1G51890,AT1G53320,AT1G53990,AT1G58340…
GO:BP	response to other organism	GO:0051707	false	7.99446e-13	12.0972	1488	2355	249	23046	AT1G01340,AT1G02660,AT1G02860,AT1G02920,AT1G03850,AT1G04400,AT1G07360,AT1G08830,AT1G09270,AT1G09415,AT1G09970,AT1G10170,AT1G10760,AT1G11310,AT1G11960,AT1G12220,AT1G13609,AT1G14370,AT1G15010,AT1G15520,AT1G15530,AT1G16030,AT1G18570,AT1G19020,AT1G22810,AT1G22890,AT1G25275,AT1G28190,AT1G32230,AT1G33560,AT1G33970,AT1G37130,AT1G44350,AT1G49050,AT1G51090,AT1G51800,AT1G51890,AT1G53320,AT1G53990,AT1G58340…
GO:BP	response to biotic stimulus	GO:0009607	false	1.09e-12	11.9626	1515	2355	252	23046	AT1G01340,AT1G02660,AT1G02860,AT1G02920,AT1G03850,AT1G04400,AT1G07360,AT1G08830,AT1G09270,AT1G09415,AT1G09970,AT1G10170,AT1G10760,AT1G11310,AT1G11960,AT1G12220,AT1G13609,AT1G14370,AT1G15010,AT1G15520,AT1G15530,AT1G16030,AT1G18570,AT1G19020,AT1G22810,AT1G22890,AT1G25275,AT1G28190,AT1G32230,AT1G33560,AT1G33970,AT1G37130,AT1G44350,AT1G49050,AT1G51090,AT1G51800,AT1G51890,AT1G53320,AT1G53990,AT1G58340…
GO:BP	biological process involved in interspecies interaction between organisms	GO:0044419	false	2.31843e-12	11.6348	1509	2355	250	23046	AT1G01340,AT1G02660,AT1G02860,AT1G02920,AT1G03850,AT1G04400,AT1G07360,AT1G08830,AT1G09270,AT1G09415,AT1G09970,AT1G10170,AT1G10760,AT1G11310,AT1G11960,AT1G12220,AT1G13609,AT1G14370,AT1G15010,AT1G15520,AT1G15530,AT1G16030,AT1G18570,AT1G19020,AT1G22810,AT1G22890,AT1G25275,AT1G28190,AT1G32230,AT1G33560,AT1G33970,AT1G37130,AT1G44350,AT1G49050,AT1G51090,AT1G51800,AT1G51890,AT1G53320,AT1G53990,AT1G58340…
GO:BP	biological regulation	GO:0065007	false	2.95086e-12	11.5301	6417	2355	820	23046	AT1G01720,AT1G01820,AT1G02220,AT1G02300,AT1G02660,AT1G02860,AT1G03290,AT1G03445,AT1G03760,AT1G03850,AT1G04170,AT1G04400,AT1G05160,AT1G05490,AT1G05680,AT1G05830,AT1G05890,AT1G06150,AT1G07110,AT1G07140,AT1G08620,AT1G08830,AT1G09080,AT1G09415,AT1G10170,AT1G10940,AT1G11310,AT1G11362,AT1G11755,AT1G11960,AT1G13210,AT1G13245,AT1G13260,AT1G13300,AT1G14360,AT1G14370,AT1G14890,AT1G14900,AT1G15040,AT1G15380…
GO:BP	response to inorganic substance	GO:0010035	false	3.27895e-12	11.4843	791	2355	153	23046	AT1G01340,AT1G02860,AT1G02920,AT1G02930,AT1G04400,AT1G05680,AT1G07660,AT1G08830,AT1G08930,AT1G09080,AT1G11755,AT1G12520,AT1G15380,AT1G15520,AT1G20630,AT1G22770,AT1G22810,AT1G22890,AT1G27510,AT1G27730,AT1G28520,AT1G32230,AT1G33560,AT1G35580,AT1G36060,AT1G43160,AT1G44810,AT1G46768,AT1G48030,AT1G48420,AT1G53540,AT1G54100,AT1G56560,AT1G59870,AT1G60200,AT1G60650,AT1G62810,AT1G64660,AT1G65500,AT1G65930…
GO:BP	signal transduction	GO:0007165	false	9.92984e-12	11.0031	2012	2355	311	23046	AT1G01720,AT1G03445,AT1G04400,AT1G09080,AT1G10940,AT1G11755,AT1G11960,AT1G13260,AT1G13300,AT1G14360,AT1G15380,AT1G15520,AT1G15530,AT1G15670,AT1G15750,AT1G16130,AT1G16510,AT1G17550,AT1G21210,AT1G21410,AT1G21910,AT1G22280,AT1G22770,AT1G22810,AT1G28520,AT1G29290,AT1G32230,AT1G32870,AT1G33600,AT1G34110,AT1G34210,AT1G35160,AT1G35670,AT1G36060,AT1G43160,AT1G45160,AT1G46768,AT1G48490,AT1G49160,AT1G49720…
GO:BP	response to reactive oxygen species	GO:0000302	false	1.36906e-11	10.8636	161	2355	52	23046	AT1G05680,AT1G08830,AT1G09080,AT1G12520,AT1G15520,AT1G19020,AT1G20630,AT1G22770,AT1G27510,AT1G32230,AT1G35580,AT1G53540,AT1G56560,AT1G73260,AT1G77120,AT2G18170,AT2G28190,AT2G43790,AT3G02840,AT3G06110,AT3G07700,AT3G10930,AT3G23400,AT3G28580,AT3G29035,AT3G46230,AT3G48360,AT4G02380,AT4G11170,AT4G12570,AT4G13540,AT4G17040,AT4G17490,AT4G18880,AT4G21870,AT4G23810,AT4G34890,AT4G37610,AT5G05410,AT5G12020…
GO:BP	response to lipid	GO:0033993	false	2.58079e-11	10.5882	999	2355	179	23046	AT1G01720,AT1G03445,AT1G04400,AT1G05680,AT1G08930,AT1G12010,AT1G13260,AT1G13300,AT1G15380,AT1G15520,AT1G15750,AT1G17550,AT1G20630,AT1G21910,AT1G24190,AT1G27730,AT1G32230,AT1G34210,AT1G35160,AT1G35670,AT1G43160,AT1G44350,AT1G47510,AT1G49720,AT1G50420,AT1G51800,AT1G54100,AT1G58340,AT1G60200,AT1G60900,AT1G61340,AT1G61380,AT1G62810,AT1G63500,AT1G66340,AT1G67100,AT1G67120,AT1G68320,AT1G69935,AT1G73000…
GO:BP	small molecule catabolic process	GO:0044282	false	4.51393e-11	10.3454	271	2355	71	23046	AT1G03090,AT1G06570,AT1G08630,AT1G10060,AT1G21400,AT1G22430,AT1G47510,AT1G48420,AT1G55510,AT1G64660,AT1G65580,AT1G67550,AT1G71710,AT1G72330,AT1G77120,AT1G79440,AT2G02390,AT2G16500,AT2G19800,AT2G32150,AT2G33150,AT2G35690,AT2G40000,AT2G41530,AT2G43400,AT3G02360,AT3G06810,AT3G07560,AT3G10050,AT3G13450,AT3G14990,AT3G16170,AT3G17770,AT3G19280,AT3G21780,AT3G22200,AT3G30775,AT3G45300,AT3G47340,AT3G47800…
GO:BP	signaling	GO:0023052	false	9.53398e-11	10.0207	2055	2355	312	23046	AT1G01720,AT1G03445,AT1G04400,AT1G09080,AT1G10940,AT1G11755,AT1G11960,AT1G13260,AT1G13300,AT1G14360,AT1G15380,AT1G15520,AT1G15530,AT1G15670,AT1G15750,AT1G16130,AT1G16510,AT1G17550,AT1G21210,AT1G21410,AT1G21910,AT1G22280,AT1G22770,AT1G22810,AT1G28520,AT1G29290,AT1G32230,AT1G32870,AT1G33600,AT1G34110,AT1G34210,AT1G35160,AT1G35670,AT1G36060,AT1G43160,AT1G45160,AT1G46768,AT1G48490,AT1G49160,AT1G49720…
GO:BP	response to endogenous stimulus	GO:0009719	false	9.74243e-11	10.0113	1669	2355	264	23046	AT1G01720,AT1G03445,AT1G03850,AT1G05680,AT1G08930,AT1G13260,AT1G13300,AT1G15380,AT1G15520,AT1G15670,AT1G15750,AT1G16510,AT1G17550,AT1G20630,AT1G21410,AT1G21910,AT1G22810,AT1G24190,AT1G27730,AT1G32230,AT1G33600,AT1G34110,AT1G34210,AT1G35160,AT1G35670,AT1G36060,AT1G43160,AT1G44350,AT1G46768,AT1G47510,AT1G49720,AT1G50420,AT1G50640,AT1G51800,AT1G54100,AT1G56010,AT1G56150,AT1G58340,AT1G59870,AT1G60200…
GO:BP	response to hormone	GO:0009725	false	1.10233e-10	9.95769	1639	2355	260	23046	AT1G01720,AT1G03445,AT1G03850,AT1G05680,AT1G08930,AT1G13260,AT1G13300,AT1G15380,AT1G15520,AT1G15670,AT1G15750,AT1G16510,AT1G17550,AT1G20630,AT1G21410,AT1G21910,AT1G22810,AT1G24190,AT1G27730,AT1G32230,AT1G33600,AT1G34110,AT1G34210,AT1G35160,AT1G35670,AT1G36060,AT1G43160,AT1G44350,AT1G46768,AT1G47510,AT1G49720,AT1G50420,AT1G50640,AT1G51800,AT1G54100,AT1G56010,AT1G56150,AT1G58340,AT1G59870,AT1G60200…
GO:BP	regulation of biological process	GO:0050789	false	2.34033e-10	9.63072	5879	2355	749	23046	AT1G01720,AT1G02220,AT1G02660,AT1G02860,AT1G03290,AT1G03445,AT1G03760,AT1G03850,AT1G04170,AT1G04400,AT1G05490,AT1G05830,AT1G05890,AT1G06150,AT1G07110,AT1G08620,AT1G08830,AT1G09080,AT1G09415,AT1G10170,AT1G10940,AT1G11310,AT1G11755,AT1G11960,AT1G13245,AT1G13260,AT1G13300,AT1G14360,AT1G14370,AT1G14900,AT1G15040,AT1G15380,AT1G15520,AT1G15530,AT1G15670,AT1G15750,AT1G15790,AT1G16130,AT1G16510,AT1G17550…
GO:BP	small molecule metabolic process	GO:0044281	false	4.77701e-10	9.32084	1853	2355	284	23046	AT1G01480,AT1G02500,AT1G02860,AT1G03090,AT1G04400,AT1G05160,AT1G05560,AT1G05680,AT1G06570,AT1G07110,AT1G08510,AT1G08550,AT1G08630,AT1G10060,AT1G10070,AT1G10170,AT1G11755,AT1G12230,AT1G12780,AT1G13700,AT1G14230,AT1G15040,AT1G15380,AT1G15710,AT1G16460,AT1G17960,AT1G18270,AT1G18500,AT1G18570,AT1G19140,AT1G20560,AT1G20950,AT1G21100,AT1G21120,AT1G21400,AT1G22410,AT1G22430,AT1G23160,AT1G24340,AT1G30680…
GO:BP	response to bacterium	GO:0009617	false	5.64277e-10	9.24851	509	2355	106	23046	AT1G01340,AT1G02860,AT1G07360,AT1G08830,AT1G10170,AT1G12220,AT1G14370,AT1G15530,AT1G18570,AT1G19020,AT1G22890,AT1G32230,AT1G33560,AT1G33970,AT1G51090,AT1G51800,AT1G51890,AT1G53990,AT1G59870,AT1G61340,AT1G61380,AT1G62810,AT1G65930,AT1G66340,AT1G68765,AT1G73260,AT1G79680,AT1G80840,AT2G03440,AT2G05940,AT2G17520,AT2G19190,AT2G22300,AT2G23810,AT2G25000,AT2G26440,AT2G27080,AT2G33340,AT2G33830,AT2G38470…
GO:BP	response to salt stress	GO:0009651	false	9.91403e-10	9.00375	473	2355	100	23046	AT1G05680,AT1G08830,AT1G08930,AT1G10170,AT1G10940,AT1G22890,AT1G27730,AT1G28520,AT1G29060,AT1G32230,AT1G43160,AT1G47510,AT1G49510,AT1G53540,AT1G54100,AT1G56060,AT1G59870,AT1G60940,AT1G61340,AT1G65500,AT1G66230,AT1G66340,AT1G77120,AT1G78080,AT2G03440,AT2G03760,AT2G15390,AT2G16500,AT2G19450,AT2G21660,AT2G25090,AT2G28190,AT2G35510,AT2G36270,AT2G37760,AT2G37770,AT2G38340,AT2G38470,AT2G40950,AT2G41010…
GO:BP	carboxylic acid catabolic process	GO:0046395	false	2.67039e-09	8.57342	165	2355	49	23046	AT1G03090,AT1G06570,AT1G08630,AT1G10060,AT1G21400,AT1G48420,AT1G55510,AT1G64660,AT1G72330,AT1G79440,AT2G02390,AT2G16500,AT2G33150,AT2G35690,AT2G40000,AT2G43400,AT3G02360,AT3G06810,AT3G07560,AT3G10050,AT3G13450,AT3G16170,AT3G21780,AT3G22200,AT3G30775,AT3G45300,AT3G47340,AT3G48990,AT3G51840,AT3G55840,AT3G58750,AT3G60510,AT3G62130,AT4G13890,AT4G14430,AT4G16760,AT4G16800,AT4G20930,AT4G33150,AT4G34030…
GO:BP	response to osmotic stress	GO:0006970	false	3.14553e-09	8.50231	557	2355	111	23046	AT1G05680,AT1G08830,AT1G08930,AT1G10170,AT1G10940,AT1G15380,AT1G22890,AT1G27730,AT1G28520,AT1G29060,AT1G29290,AT1G32230,AT1G43160,AT1G47510,AT1G49510,AT1G53540,AT1G54100,AT1G56060,AT1G58340,AT1G59870,AT1G60940,AT1G61340,AT1G65500,AT1G66230,AT1G66340,AT1G77120,AT1G78080,AT1G78290,AT2G03440,AT2G03760,AT2G15390,AT2G16500,AT2G17820,AT2G19450,AT2G21660,AT2G23030,AT2G25090,AT2G28190,AT2G35510,AT2G36270…
GO:BP	multicellular organism development	GO:0007275	true	4.33763e-09	8.36275	2688	2355	380	23046	AT1G01480,AT1G01550,AT1G01910,AT1G04400,AT1G05680,AT1G05830,AT1G06150,AT1G06520,AT1G08300,AT1G08620,AT1G09230,AT1G09330,AT1G09970,AT1G10940,AT1G13245,AT1G13260,AT1G13300,AT1G14360,AT1G14740,AT1G15040,AT1G15520,AT1G15750,AT1G16280,AT1G16460,AT1G16510,AT1G17020,AT1G19080,AT1G21210,AT1G21410,AT1G21920,AT1G22770,AT1G28240,AT1G28520,AT1G29290,AT1G30210,AT1G30610,AT1G30810,AT1G30970,AT1G31814,AT1G32230…
GO:BP	defense response	GO:0006952	false	4.51469e-09	8.34537	1694	2355	260	23046	AT1G02300,AT1G02660,AT1G02860,AT1G02920,AT1G02930,AT1G03850,AT1G04400,AT1G07360,AT1G08830,AT1G09415,AT1G09970,AT1G10170,AT1G11310,AT1G11960,AT1G12010,AT1G12220,AT1G13609,AT1G14370,AT1G15010,AT1G15380,AT1G15520,AT1G15530,AT1G15890,AT1G18570,AT1G22890,AT1G24030,AT1G32230,AT1G33560,AT1G33970,AT1G43160,AT1G44350,AT1G49050,AT1G50640,AT1G51090,AT1G51800,AT1G51890,AT1G53990,AT1G58410,AT1G58420,AT1G59870…
GO:BP	organic acid catabolic process	GO:0016054	false	5.49989e-09	8.25965	179	2355	51	23046	AT1G03090,AT1G06570,AT1G08630,AT1G10060,AT1G21400,AT1G48420,AT1G55510,AT1G64660,AT1G72330,AT1G79440,AT2G02390,AT2G16500,AT2G33150,AT2G35690,AT2G40000,AT2G43400,AT3G02360,AT3G06810,AT3G07560,AT3G10050,AT3G13450,AT3G16170,AT3G21780,AT3G22200,AT3G30775,AT3G45300,AT3G47340,AT3G48990,AT3G51840,AT3G55840,AT3G58750,AT3G60510,AT3G62130,AT4G13890,AT4G14430,AT4G16760,AT4G16800,AT4G20930,AT4G28420,AT4G33150…
GO:BP	system development	GO:0048731	false	7.72628e-09	8.11203	2087	2355	307	23046	AT1G01480,AT1G01550,AT1G01910,AT1G04400,AT1G05680,AT1G05830,AT1G06150,AT1G08300,AT1G08620,AT1G09230,AT1G09330,AT1G10940,AT1G13245,AT1G13260,AT1G13300,AT1G15040,AT1G15750,AT1G16460,AT1G16510,AT1G17020,AT1G19080,AT1G21210,AT1G21410,AT1G21920,AT1G22770,AT1G28240,AT1G28520,AT1G29290,AT1G30210,AT1G30610,AT1G30810,AT1G30970,AT1G31814,AT1G32230,AT1G32440,AT1G32500,AT1G34110,AT1G35580,AT1G44090,AT1G47200…
GO:BP	metabolic process	GO:0008152	false	7.9967e-09	8.09709	13600	2355	1541	23046	AT1G01350,AT1G01480,AT1G01650,AT1G01720,AT1G01860,AT1G02220,AT1G02270,AT1G02300,AT1G02500,AT1G02640,AT1G02660,AT1G02850,AT1G02860,AT1G02920,AT1G02930,AT1G03090,AT1G03150,AT1G03280,AT1G03290,AT1G03760,AT1G03850,AT1G04140,AT1G04170,AT1G04400,AT1G04860,AT1G04990,AT1G05160,AT1G05490,AT1G05560,AT1G05575,AT1G05680,AT1G05790,AT1G05830,AT1G05890,AT1G06150,AT1G06410,AT1G06520,AT1G06570,AT1G06840,AT1G07110…
GO:BP	organic substance metabolic process	GO:0071704	false	1.22382e-08	7.91228	12672	2355	1447	23046	AT1G01350,AT1G01480,AT1G01650,AT1G01720,AT1G01860,AT1G02220,AT1G02270,AT1G02300,AT1G02500,AT1G02640,AT1G02660,AT1G02850,AT1G02860,AT1G03090,AT1G03150,AT1G03280,AT1G03290,AT1G03760,AT1G03850,AT1G04170,AT1G04400,AT1G04860,AT1G04990,AT1G05160,AT1G05490,AT1G05560,AT1G05680,AT1G05790,AT1G05830,AT1G05890,AT1G06150,AT1G06410,AT1G06520,AT1G06570,AT1G06840,AT1G07110,AT1G07130,AT1G07650,AT1G07730,AT1G08070…
GO:BP	regulation of response to stimulus	GO:0048583	false	1.2789e-08	7.89316	792	2355	142	23046	AT1G01720,AT1G02660,AT1G03445,AT1G04400,AT1G07110,AT1G09415,AT1G11310,AT1G11960,AT1G13300,AT1G14370,AT1G15380,AT1G15670,AT1G21920,AT1G22770,AT1G28520,AT1G29060,AT1G32870,AT1G33970,AT1G35670,AT1G44350,AT1G50640,AT1G51090,AT1G51800,AT1G56060,AT1G59870,AT1G61380,AT1G66230,AT1G66340,AT1G67470,AT1G69935,AT1G71090,AT1G77120,AT1G79950,AT1G80840,AT2G02220,AT2G03440,AT2G04550,AT2G16365,AT2G18950,AT2G21660…
GO:BP	response to abscisic acid	GO:0009737	false	1.40367e-08	7.85273	591	2355	114	23046	AT1G01720,AT1G05680,AT1G08930,AT1G13300,AT1G15380,AT1G15520,AT1G17550,AT1G20630,AT1G24190,AT1G27730,AT1G35670,AT1G43160,AT1G47510,AT1G49720,AT1G51800,AT1G54100,AT1G58340,AT1G60200,AT1G60900,AT1G61340,AT1G62810,AT1G66340,AT1G67120,AT1G69935,AT1G73000,AT1G75750,AT1G77120,AT2G03440,AT2G04550,AT2G05520,AT2G16600,AT2G17820,AT2G19450,AT2G25770,AT2G25930,AT2G26300,AT2G26980,AT2G29940,AT2G32020,AT2G32150…
GO:BP	response to alcohol	GO:0097305	false	1.73716e-08	7.76016	600	2355	115	23046	AT1G01720,AT1G05680,AT1G08930,AT1G13300,AT1G15380,AT1G15520,AT1G17550,AT1G20630,AT1G24190,AT1G27730,AT1G35670,AT1G43160,AT1G47510,AT1G49720,AT1G51800,AT1G54100,AT1G58340,AT1G60200,AT1G60900,AT1G61340,AT1G62810,AT1G66340,AT1G67120,AT1G69935,AT1G73000,AT1G75750,AT1G77120,AT2G03440,AT2G04550,AT2G05520,AT2G16600,AT2G17820,AT2G19450,AT2G25770,AT2G25930,AT2G26300,AT2G26980,AT2G29940,AT2G32020,AT2G32150…
GO:BP	multicellular organismal process	GO:0032501	false	2.40203e-08	7.61942	2962	2355	408	23046	AT1G01480,AT1G01550,AT1G01910,AT1G04400,AT1G05680,AT1G05830,AT1G06150,AT1G06520,AT1G08300,AT1G08620,AT1G09080,AT1G09230,AT1G09330,AT1G09970,AT1G10940,AT1G13245,AT1G13260,AT1G13300,AT1G14360,AT1G14740,AT1G15040,AT1G15520,AT1G15750,AT1G16280,AT1G16460,AT1G16510,AT1G17020,AT1G19080,AT1G21120,AT1G21210,AT1G21410,AT1G21920,AT1G22770,AT1G27470,AT1G27730,AT1G28240,AT1G28520,AT1G29290,AT1G30210,AT1G30610…
GO:BP	response to hydrogen peroxide	GO:0042542	false	2.98311e-08	7.52533	73	2355	29	23046	AT1G05680,AT1G20630,AT1G22770,AT1G35580,AT1G53540,AT1G56560,AT1G73260,AT1G77120,AT2G18170,AT2G43790,AT3G10930,AT3G29035,AT3G46230,AT3G48360,AT4G02380,AT4G12570,AT4G13540,AT4G21870,AT4G23810,AT4G37610,AT5G05410,AT5G12020,AT5G12030,AT5G24110,AT5G39610,AT5G45010,AT5G46350,AT5G63160,AT5G67480
GO:BP	defense response to bacterium	GO:0042742	false	3.91975e-08	7.40674	407	2355	86	23046	AT1G02860,AT1G07360,AT1G08830,AT1G10170,AT1G12220,AT1G14370,AT1G15530,AT1G18570,AT1G22890,AT1G32230,AT1G33560,AT1G33970,AT1G51090,AT1G51800,AT1G51890,AT1G53990,AT1G59870,AT1G65930,AT1G66340,AT1G68765,AT1G73260,AT1G80840,AT2G03440,AT2G05940,AT2G17520,AT2G19190,AT2G22300,AT2G23810,AT2G25000,AT2G27080,AT2G33340,AT2G38470,AT2G40000,AT2G41370,AT2G41560,AT2G43790,AT2G46400,AT3G10930,AT3G14130,AT3G20770…
GO:BP	organic acid metabolic process	GO:0006082	false	4.44131e-08	7.35249	1234	2355	198	23046	AT1G01480,AT1G02860,AT1G03090,AT1G05160,AT1G05560,AT1G05680,AT1G06570,AT1G08510,AT1G08550,AT1G08630,AT1G10060,AT1G10070,AT1G10170,AT1G15040,AT1G15710,AT1G16460,AT1G17960,AT1G18270,AT1G18500,AT1G18570,AT1G20560,AT1G20950,AT1G21100,AT1G21120,AT1G21400,AT1G22410,AT1G23160,AT1G30820,AT1G32440,AT1G35580,AT1G37130,AT1G44090,AT1G44350,AT1G48420,AT1G51720,AT1G55510,AT1G55920,AT1G59870,AT1G61850,AT1G63660…
GO:BP	root system development	GO:0022622	false	4.50239e-08	7.34656	616	2355	116	23046	AT1G01550,AT1G01910,AT1G06150,AT1G08300,AT1G10940,AT1G13260,AT1G13300,AT1G16510,AT1G21210,AT1G21410,AT1G29290,AT1G32230,AT1G34110,AT1G35580,AT1G47200,AT1G48920,AT1G49240,AT1G52240,AT1G53330,AT1G56010,AT1G56560,AT1G58340,AT1G59870,AT1G60940,AT1G68320,AT1G68765,AT1G69935,AT1G71090,AT1G75110,AT1G75120,AT1G76210,AT1G78240,AT1G78870,AT1G79950,AT2G05520,AT2G11890,AT2G31280,AT2G35510,AT2G37430,AT2G42490…
GO:BP	plant organ development	GO:0099402	false	4.91564e-08	7.30842	1165	2355	189	23046	AT1G01550,AT1G01910,AT1G04400,AT1G06150,AT1G08300,AT1G08620,AT1G09330,AT1G10940,AT1G13260,AT1G13300,AT1G16510,AT1G17020,AT1G21210,AT1G21410,AT1G29290,AT1G30210,AT1G32230,AT1G34110,AT1G35580,AT1G47200,AT1G48920,AT1G49240,AT1G52240,AT1G53330,AT1G54130,AT1G54570,AT1G56010,AT1G56180,AT1G56560,AT1G58340,AT1G59870,AT1G60160,AT1G60940,AT1G65470,AT1G68320,AT1G68765,AT1G69935,AT1G71090,AT1G73680,AT1G75110…
GO:BP	ribosome biogenesis	GO:0042254	true	5.31485e-08	7.27451	416	2355	87	23046	AT1G01860,AT1G10490,AT1G12780,AT1G13160,AT1G15420,AT1G16280,AT1G30240,AT1G30960,AT1G41880,AT1G42440,AT1G45230,AT1G48920,AT1G51380,AT1G52980,AT1G55150,AT1G60000,AT1G60080,AT1G63180,AT1G63980,AT1G66580,AT1G67120,AT1G69070,AT1G70200,AT1G79150,AT1G80750,AT2G03820,AT2G17240,AT2G17250,AT2G18220,AT2G24500,AT2G25355,AT2G31890,AT2G37990,AT2G42710,AT2G47420,AT2G47610,AT2G47990,AT3G06530,AT3G10530,AT3G11250…
GO:BP	root development	GO:0048364	false	8.55729e-08	7.06766	615	2355	115	23046	AT1G01550,AT1G01910,AT1G06150,AT1G08300,AT1G10940,AT1G13260,AT1G13300,AT1G16510,AT1G21210,AT1G21410,AT1G29290,AT1G32230,AT1G34110,AT1G35580,AT1G47200,AT1G48920,AT1G49240,AT1G52240,AT1G53330,AT1G56010,AT1G56560,AT1G58340,AT1G59870,AT1G60940,AT1G68320,AT1G68765,AT1G69935,AT1G71090,AT1G75110,AT1G75120,AT1G76210,AT1G78240,AT1G78870,AT1G79950,AT2G05520,AT2G11890,AT2G31280,AT2G35510,AT2G37430,AT2G42490…
GO:BP	oxoacid metabolic process	GO:0043436	false	1.04625e-07	6.98036	1191	2355	191	23046	AT1G01480,AT1G02860,AT1G03090,AT1G05560,AT1G05680,AT1G06570,AT1G08510,AT1G08550,AT1G08630,AT1G10060,AT1G10070,AT1G10170,AT1G15040,AT1G15710,AT1G16460,AT1G17960,AT1G18270,AT1G18500,AT1G18570,AT1G20560,AT1G20950,AT1G21100,AT1G21120,AT1G21400,AT1G22410,AT1G23160,AT1G30820,AT1G32440,AT1G35580,AT1G37130,AT1G44350,AT1G48420,AT1G51720,AT1G55510,AT1G55920,AT1G59870,AT1G61850,AT1G63660,AT1G64660,AT1G65930…
GO:BP	response to organic cyclic compound	GO:0014070	false	1.13059e-07	6.94669	342	2355	75	23046	AT1G02860,AT1G03445,AT1G04400,AT1G05560,AT1G13260,AT1G15380,AT1G15520,AT1G21910,AT1G22500,AT1G34210,AT1G35160,AT1G43160,AT1G56300,AT1G59870,AT1G61340,AT1G62810,AT1G63500,AT1G65510,AT1G66180,AT1G67070,AT1G73260,AT1G75750,AT1G76680,AT1G77120,AT1G78300,AT1G79680,AT1G80840,AT2G02740,AT2G03760,AT2G05520,AT2G17520,AT2G22300,AT2G25000,AT2G29420,AT2G40000,AT2G40400,AT2G42490,AT2G44080,AT2G46400,AT3G11280…
GO:BP	amino acid catabolic process	GO:0009063	false	1.80109e-07	6.74447	97	2355	33	23046	AT1G03090,AT1G06570,AT1G08630,AT1G10060,AT1G21400,AT1G48420,AT1G55510,AT1G64660,AT1G72330,AT1G79440,AT2G02390,AT2G16500,AT2G40000,AT2G43400,AT3G10050,AT3G13450,AT3G22200,AT3G30775,AT3G45300,AT3G47340,AT3G55840,AT3G60510,AT3G62130,AT4G13890,AT4G16800,AT4G20930,AT4G33150,AT4G34030,AT4G39660,AT5G07440,AT5G18170,AT5G36160,AT5G65940
GO:BP	rRNA processing	GO:0006364	false	2.48574e-07	6.60454	302	2355	68	23046	AT1G01860,AT1G10490,AT1G12780,AT1G15420,AT1G16280,AT1G30240,AT1G42440,AT1G45230,AT1G48920,AT1G51380,AT1G55150,AT1G60000,AT1G60080,AT1G63180,AT1G63980,AT1G67120,AT1G69070,AT1G70200,AT1G80750,AT2G17240,AT2G17250,AT2G24500,AT2G25355,AT2G31890,AT2G37990,AT2G42710,AT2G47420,AT2G47610,AT2G47990,AT3G06530,AT3G10530,AT3G11510,AT3G11964,AT3G13740,AT3G15080,AT3G18600,AT3G18610,AT3G19440,AT3G21540,AT3G22330…
GO:BP	protein modification process	GO:0036211	false	2.52394e-07	6.59792	2927	2355	398	23046	AT1G02860,AT1G03150,AT1G04860,AT1G05830,AT1G05890,AT1G06840,AT1G07650,AT1G08620,AT1G09970,AT1G10170,AT1G10600,AT1G10940,AT1G11755,AT1G12730,AT1G13270,AT1G14370,AT1G15530,AT1G16130,AT1G17550,AT1G18340,AT1G18390,AT1G18490,AT1G18660,AT1G19660,AT1G21210,AT1G21410,AT1G22280,AT1G22500,AT1G23780,AT1G24030,AT1G24190,AT1G25390,AT1G27630,AT1G27930,AT1G28120,AT1G30000,AT1G30970,AT1G31420,AT1G32210,AT1G34110…
GO:BP	cellular catabolic process	GO:0044248	false	3.17666e-07	6.49803	1406	2355	216	23046	AT1G02640,AT1G02920,AT1G02930,AT1G03090,AT1G04140,AT1G04860,AT1G05890,AT1G06570,AT1G08630,AT1G09080,AT1G09210,AT1G10060,AT1G10760,AT1G14210,AT1G14230,AT1G17170,AT1G18070,AT1G20630,AT1G21400,AT1G21410,AT1G22430,AT1G22880,AT1G28260,AT1G30000,AT1G33270,AT1G35580,AT1G47570,AT1G48420,AT1G49180,AT1G54710,AT1G55150,AT1G55510,AT1G56560,AT1G59870,AT1G60080,AT1G64660,AT1G65610,AT1G65970,AT1G66650,AT1G69830…
GO:BP	macromolecule modification	GO:0043412	false	3.62241e-07	6.441	3292	2355	439	23046	AT1G01860,AT1G02860,AT1G03150,AT1G04860,AT1G05830,AT1G05890,AT1G06840,AT1G07650,AT1G08620,AT1G09970,AT1G10170,AT1G10490,AT1G10600,AT1G10940,AT1G11755,AT1G12730,AT1G13270,AT1G14370,AT1G15480,AT1G15510,AT1G15530,AT1G16130,AT1G17550,AT1G18340,AT1G18390,AT1G18490,AT1G18660,AT1G19660,AT1G21210,AT1G21410,AT1G22280,AT1G22500,AT1G22830,AT1G23780,AT1G24030,AT1G24190,AT1G25390,AT1G27630,AT1G27930,AT1G28120…
GO:BP	cellular response to organic substance	GO:0071310	false	5.72079e-07	6.24254	1263	2355	197	23046	AT1G01720,AT1G03445,AT1G05680,AT1G08830,AT1G09080,AT1G11755,AT1G12010,AT1G13260,AT1G13300,AT1G14360,AT1G15380,AT1G15520,AT1G15670,AT1G15750,AT1G16030,AT1G16510,AT1G17550,AT1G21410,AT1G21910,AT1G22810,AT1G32230,AT1G33600,AT1G34110,AT1G34210,AT1G35160,AT1G35670,AT1G36060,AT1G43160,AT1G46768,AT1G49720,AT1G50640,AT1G51800,AT1G56010,AT1G56150,AT1G59870,AT1G60200,AT1G61380,AT1G62300,AT1G62810,AT1G63500…
GO:BP	cellular metabolic process	GO:0044237	false	7.47137e-07	6.1266	11352	2355	1299	23046	AT1G01350,AT1G01480,AT1G01720,AT1G01860,AT1G02220,AT1G02270,AT1G02500,AT1G02640,AT1G02860,AT1G02920,AT1G02930,AT1G03090,AT1G03280,AT1G03290,AT1G03760,AT1G03850,AT1G04140,AT1G04170,AT1G04400,AT1G04860,AT1G04990,AT1G05160,AT1G05560,AT1G05575,AT1G05680,AT1G05830,AT1G05890,AT1G06150,AT1G06410,AT1G06520,AT1G06570,AT1G06840,AT1G07110,AT1G07130,AT1G07650,AT1G07730,AT1G08070,AT1G08510,AT1G08550,AT1G08620…
GO:BP	rRNA metabolic process	GO:0016072	false	7.49136e-07	6.12544	316	2355	69	23046	AT1G01860,AT1G10490,AT1G12780,AT1G15420,AT1G16280,AT1G30240,AT1G42440,AT1G45230,AT1G48920,AT1G51380,AT1G55150,AT1G60000,AT1G60080,AT1G63180,AT1G63980,AT1G67120,AT1G69070,AT1G70200,AT1G80750,AT2G02955,AT2G17240,AT2G17250,AT2G24500,AT2G25355,AT2G31890,AT2G37990,AT2G42710,AT2G47420,AT2G47610,AT2G47990,AT3G06530,AT3G10530,AT3G11510,AT3G11964,AT3G13740,AT3G15080,AT3G18600,AT3G18610,AT3G19440,AT3G21540…
GO:BP	catabolic process	GO:0009056	false	9.4427e-07	6.0249	1925	2355	277	23046	AT1G02300,AT1G02640,AT1G02660,AT1G02920,AT1G02930,AT1G03090,AT1G04140,AT1G04860,AT1G05890,AT1G06570,AT1G08630,AT1G09080,AT1G09210,AT1G09910,AT1G10060,AT1G10760,AT1G14210,AT1G14230,AT1G17170,AT1G18070,AT1G18270,AT1G20120,AT1G20630,AT1G20950,AT1G21400,AT1G21410,AT1G22430,AT1G22880,AT1G28260,AT1G28600,AT1G30000,AT1G32440,AT1G33270,AT1G35580,AT1G47510,AT1G47570,AT1G48420,AT1G49180,AT1G53780,AT1G53990…
GO:BP	primary metabolic process	GO:0044238	false	1.28577e-06	5.89084	11903	2355	1353	23046	AT1G01350,AT1G01480,AT1G01650,AT1G01720,AT1G01860,AT1G02220,AT1G02270,AT1G02300,AT1G02640,AT1G02660,AT1G02850,AT1G02860,AT1G03090,AT1G03150,AT1G03280,AT1G03290,AT1G03760,AT1G03850,AT1G04170,AT1G04400,AT1G04860,AT1G04990,AT1G05160,AT1G05560,AT1G05790,AT1G05830,AT1G05890,AT1G06150,AT1G06410,AT1G06520,AT1G06570,AT1G06840,AT1G07110,AT1G07130,AT1G07650,AT1G08070,AT1G08210,AT1G08510,AT1G08550,AT1G08620…
GO:BP	response to salicylic acid	GO:0009751	false	1.99882e-06	5.69923	184	2355	47	23046	AT1G02860,AT1G05560,AT1G15380,AT1G15520,AT1G21910,AT1G43160,AT1G61340,AT1G62810,AT1G65510,AT1G73260,AT1G76680,AT1G79680,AT1G80840,AT2G02740,AT2G03760,AT2G05520,AT2G17520,AT2G25000,AT2G29420,AT2G40000,AT2G42490,AT2G46400,AT3G11280,AT3G20470,AT3G48360,AT3G50480,AT3G50930,AT3G51440,AT3G61190,AT4G23270,AT4G23810,AT4G31800,AT4G32940,AT4G35890,AT4G37610,AT5G06320,AT5G08790,AT5G13330,AT5G14930,AT5G24110…
GO:BP	regulation of cellular process	GO:0050794	false	2.80331e-06	5.55233	5120	2355	637	23046	AT1G01720,AT1G02220,AT1G02860,AT1G03290,AT1G03445,AT1G03760,AT1G03850,AT1G04170,AT1G04400,AT1G05830,AT1G05890,AT1G06150,AT1G08620,AT1G09080,AT1G10170,AT1G10940,AT1G11755,AT1G11960,AT1G13245,AT1G13260,AT1G13300,AT1G14360,AT1G14900,AT1G15380,AT1G15520,AT1G15530,AT1G15670,AT1G15750,AT1G15790,AT1G16130,AT1G16510,AT1G17550,AT1G18070,AT1G18330,AT1G18340,AT1G18570,AT1G18860,AT1G20693,AT1G20696,AT1G21210…
GO:BP	rhythmic process	GO:0048511	false	3.74711e-06	5.4263	152	2355	41	23046	AT1G04400,AT1G18330,AT1G22770,AT2G16365,AT2G21660,AT2G23080,AT2G25930,AT2G40080,AT2G46790,AT2G47890,AT3G06080,AT3G06500,AT3G07650,AT3G11540,AT3G15620,AT3G26740,AT3G46640,AT3G48360,AT3G50000,AT3G51550,AT3G61070,AT4G02570,AT4G03390,AT4G04920,AT4G15090,AT4G26700,AT4G33980,AT4G37520,AT5G02810,AT5G02840,AT5G10140,AT5G24470,AT5G25830,AT5G28770,AT5G37260,AT5G42900,AT5G59570,AT5G60100,AT5G61380,AT5G64120…
GO:BP	alpha-amino acid catabolic process	GO:1901606	false	4.96706e-06	5.3039	93	2355	30	23046	AT1G03090,AT1G06570,AT1G08630,AT1G10060,AT1G48420,AT1G64660,AT1G72330,AT1G79440,AT2G02390,AT2G16500,AT2G40000,AT2G43400,AT3G10050,AT3G22200,AT3G30775,AT3G45300,AT3G55840,AT3G60510,AT3G62130,AT4G13890,AT4G20930,AT4G28420,AT4G33150,AT4G34030,AT4G39660,AT5G07440,AT5G18170,AT5G36160,AT5G53970,AT5G65940
GO:BP	developmental process	GO:0032502	false	7.36517e-06	5.13282	3323	2355	434	23046	AT1G01480,AT1G01550,AT1G01910,AT1G04400,AT1G05680,AT1G05830,AT1G06150,AT1G06520,AT1G08300,AT1G08620,AT1G09080,AT1G09230,AT1G09330,AT1G09970,AT1G10940,AT1G13245,AT1G13260,AT1G13300,AT1G14360,AT1G14740,AT1G15040,AT1G15520,AT1G15750,AT1G16280,AT1G16460,AT1G16510,AT1G17020,AT1G19080,AT1G19835,AT1G21210,AT1G21410,AT1G21920,AT1G22620,AT1G22770,AT1G27470,AT1G27730,AT1G28240,AT1G28520,AT1G29290,AT1G30210…
GO:BP	carboxylic acid metabolic process	GO:0019752	false	7.41356e-06	5.12997	1063	2355	167	23046	AT1G01480,AT1G02860,AT1G03090,AT1G05560,AT1G05680,AT1G06570,AT1G08510,AT1G08550,AT1G08630,AT1G10060,AT1G10070,AT1G10170,AT1G15040,AT1G15710,AT1G16460,AT1G17960,AT1G18270,AT1G18500,AT1G20560,AT1G20950,AT1G21400,AT1G22410,AT1G23160,AT1G30820,AT1G32440,AT1G35580,AT1G44350,AT1G48420,AT1G51720,AT1G55510,AT1G55920,AT1G61850,AT1G63660,AT1G64660,AT1G65930,AT1G66230,AT1G67070,AT1G70480,AT1G70980,AT1G72330…
GO:BP	response to temperature stimulus	GO:0009266	false	8.84901e-06	5.05311	649	2355	113	23046	AT1G01860,AT1G08550,AT1G08930,AT1G10760,AT1G15380,AT1G15520,AT1G16030,AT1G21910,AT1G22770,AT1G22890,AT1G27730,AT1G28210,AT1G28520,AT1G43160,AT1G46768,AT1G53540,AT1G58340,AT1G59870,AT1G60170,AT1G60650,AT1G65500,AT1G66340,AT1G67470,AT1G67970,AT1G70200,AT1G77120,AT1G78080,AT1G79440,AT1G80030,AT2G03440,AT2G16500,AT2G18950,AT2G19450,AT2G21660,AT2G22300,AT2G22360,AT2G23980,AT2G24500,AT2G25140,AT2G25930…
GO:BP	anatomical structure development	GO:0048856	false	9.09986e-06	5.04097	3161	2355	415	23046	AT1G01480,AT1G01550,AT1G01910,AT1G04400,AT1G05680,AT1G05830,AT1G06150,AT1G06520,AT1G08300,AT1G08620,AT1G09080,AT1G09230,AT1G09330,AT1G09970,AT1G10940,AT1G13245,AT1G13260,AT1G13300,AT1G14360,AT1G14740,AT1G15040,AT1G15520,AT1G15750,AT1G16280,AT1G16460,AT1G16510,AT1G17020,AT1G19080,AT1G19835,AT1G21210,AT1G21410,AT1G21920,AT1G22620,AT1G22770,AT1G27470,AT1G28240,AT1G28520,AT1G29290,AT1G30210,AT1G30610…
GO:BP	response to acid chemical	GO:0001101	false	9.5202e-06	5.02135	460	2355	87	23046	AT1G02930,AT1G04400,AT1G05680,AT1G07660,AT1G08930,AT1G11755,AT1G15380,AT1G15520,AT1G22810,AT1G22890,AT1G27730,AT1G28520,AT1G32230,AT1G33560,AT1G36060,AT1G43160,AT1G46768,AT1G54100,AT1G59870,AT1G60200,AT1G60650,AT1G61340,AT1G62810,AT1G64660,AT1G65500,AT1G77120,AT1G78080,AT2G05520,AT2G16600,AT2G17820,AT2G18050,AT2G21660,AT2G29110,AT2G29120,AT2G30580,AT2G32150,AT2G32390,AT2G36270,AT2G37760,AT2G37770…
GO:BP	response to toxic substance	GO:0009636	false	1.09497e-05	4.9606	336	2355	69	23046	AT1G02920,AT1G02930,AT1G08830,AT1G10170,AT1G12520,AT1G15380,AT1G17170,AT1G20630,AT1G22430,AT1G33100,AT1G33110,AT1G37130,AT1G58340,AT1G59870,AT1G64820,AT1G65970,AT1G66760,AT1G66780,AT1G67070,AT1G69920,AT1G69930,AT1G71140,AT1G73680,AT1G77120,AT1G77760,AT2G02390,AT2G04040,AT2G04050,AT2G04070,AT2G15490,AT2G25080,AT2G28190,AT2G29420,AT2G29460,AT2G29490,AT2G34360,AT2G36800,AT2G37760,AT2G37770,AT2G41530…
GO:BP	organic substance catabolic process	GO:1901575	false	1.41563e-05	4.84905	1668	2355	240	23046	AT1G02300,AT1G02640,AT1G02660,AT1G03090,AT1G04860,AT1G05890,AT1G06570,AT1G08630,AT1G09080,AT1G09210,AT1G09910,AT1G10060,AT1G10760,AT1G14210,AT1G14230,AT1G17170,AT1G18070,AT1G18270,AT1G20120,AT1G20950,AT1G21400,AT1G21410,AT1G22430,AT1G22880,AT1G28260,AT1G28600,AT1G30000,AT1G32440,AT1G33270,AT1G35580,AT1G47510,AT1G47570,AT1G48420,AT1G53780,AT1G53990,AT1G55150,AT1G55510,AT1G56560,AT1G59870,AT1G60080…
GO:BP	regulation of response to stress	GO:0080134	false	2.15712e-05	4.66613	418	2355	80	23046	AT1G02660,AT1G09415,AT1G11310,AT1G11960,AT1G14370,AT1G29060,AT1G32870,AT1G33970,AT1G44350,AT1G51090,AT1G51800,AT1G56060,AT1G59870,AT1G61380,AT1G66230,AT1G77120,AT1G79950,AT1G80840,AT2G02220,AT2G03440,AT2G18950,AT2G21660,AT2G22300,AT2G23080,AT2G25000,AT2G25620,AT2G29460,AT2G31865,AT2G38240,AT2G41370,AT2G43790,AT2G46400,AT3G01310,AT3G06110,AT3G07700,AT3G10930,AT3G14840,AT3G14990,AT3G26830,AT3G29160…
GO:BP	cellular response to endogenous stimulus	GO:0071495	false	2.76366e-05	4.55852	1107	2355	170	23046	AT1G01720,AT1G03445,AT1G05680,AT1G13260,AT1G13300,AT1G15380,AT1G15520,AT1G15670,AT1G15750,AT1G16510,AT1G17550,AT1G21410,AT1G21910,AT1G22810,AT1G32230,AT1G33600,AT1G34110,AT1G34210,AT1G35160,AT1G35670,AT1G36060,AT1G43160,AT1G46768,AT1G49720,AT1G50640,AT1G51800,AT1G56010,AT1G56150,AT1G59870,AT1G60200,AT1G62300,AT1G62810,AT1G63500,AT1G66340,AT1G67120,AT1G68320,AT1G69935,AT1G71090,AT1G71520,AT1G73000…
GO:BP	cellular response to hormone stimulus	GO:0032870	false	2.94786e-05	4.53049	1076	2355	166	23046	AT1G01720,AT1G03445,AT1G05680,AT1G13260,AT1G13300,AT1G15380,AT1G15520,AT1G15670,AT1G15750,AT1G16510,AT1G17550,AT1G21410,AT1G21910,AT1G22810,AT1G32230,AT1G33600,AT1G34110,AT1G34210,AT1G35160,AT1G35670,AT1G36060,AT1G43160,AT1G46768,AT1G49720,AT1G50640,AT1G51800,AT1G56010,AT1G56150,AT1G59870,AT1G60200,AT1G62300,AT1G62810,AT1G63500,AT1G66340,AT1G67120,AT1G68320,AT1G69935,AT1G71090,AT1G71520,AT1G73000…
GO:BP	plant organ senescence	GO:0090693	false	3.2912e-05	4.48265	157	2355	40	23046	AT1G08620,AT1G17020,AT1G54130,AT1G54570,AT1G73680,AT2G22300,AT2G35980,AT2G39200,AT2G43790,AT3G01090,AT3G04060,AT3G10500,AT3G12130,AT3G15010,AT3G19290,AT3G21520,AT3G26840,AT3G27110,AT3G29035,AT3G44680,AT3G62080,AT4G02020,AT4G02380,AT4G12570,AT4G15090,AT4G23810,AT4G27410,AT4G32940,AT4G35890,AT4G36900,AT5G04870,AT5G08790,AT5G11520,AT5G14930,AT5G22070,AT5G24110,AT5G24530,AT5G39520,AT5G39610,AT5G45900
GO:BP	defense response to other organism	GO:0098542	false	3.665e-05	4.43593	1184	2355	179	23046	AT1G02660,AT1G02860,AT1G02920,AT1G03850,AT1G04400,AT1G07360,AT1G08830,AT1G09415,AT1G09970,AT1G10170,AT1G11310,AT1G11960,AT1G12220,AT1G13609,AT1G14370,AT1G15010,AT1G15520,AT1G15530,AT1G18570,AT1G22890,AT1G32230,AT1G33560,AT1G33970,AT1G44350,AT1G49050,AT1G51090,AT1G51800,AT1G51890,AT1G53990,AT1G59870,AT1G61360,AT1G61380,AT1G65930,AT1G66340,AT1G66540,AT1G66980,AT1G68765,AT1G73260,AT1G74360,AT1G75380…
GO:BP	leaf development	GO:0048366	false	3.81255e-05	4.41878	395	2355	76	23046	AT1G04400,AT1G08620,AT1G13260,AT1G17020,AT1G30210,AT1G48920,AT1G54130,AT1G54570,AT1G56180,AT1G59870,AT1G60160,AT1G65470,AT1G73680,AT1G79440,AT2G01940,AT2G22300,AT2G28890,AT2G35980,AT2G39200,AT2G43790,AT2G46310,AT3G01090,AT3G04060,AT3G05040,AT3G07050,AT3G10500,AT3G11220,AT3G11450,AT3G12130,AT3G15010,AT3G15070,AT3G15380,AT3G19290,AT3G20630,AT3G22200,AT3G27110,AT3G29035,AT3G44600,AT3G44680,AT3G46110…
GO:BP	phosphorus metabolic process	GO:0006793	false	4.18715e-05	4.37808	2284	2355	310	23046	AT1G03760,AT1G04400,AT1G06520,AT1G06840,AT1G07110,AT1G07650,AT1G09970,AT1G10760,AT1G10900,AT1G10940,AT1G12230,AT1G12730,AT1G12780,AT1G13560,AT1G13640,AT1G13700,AT1G14230,AT1G14370,AT1G15530,AT1G16130,AT1G17550,AT1G18270,AT1G18340,AT1G18390,AT1G19600,AT1G20950,AT1G21210,AT1G21920,AT1G22280,AT1G22620,AT1G24030,AT1G25390,AT1G26270,AT1G27630,AT1G30680,AT1G30820,AT1G31420,AT1G32440,AT1G34110,AT1G34210…
GO:BP	hormone-mediated signaling pathway	GO:0009755	false	5.2106e-05	4.28311	1013	2355	157	23046	AT1G01720,AT1G03445,AT1G13260,AT1G13300,AT1G15380,AT1G15520,AT1G15670,AT1G15750,AT1G16510,AT1G17550,AT1G21410,AT1G21910,AT1G22810,AT1G32230,AT1G33600,AT1G34110,AT1G34210,AT1G35160,AT1G35670,AT1G36060,AT1G43160,AT1G46768,AT1G49720,AT1G50640,AT1G51800,AT1G56010,AT1G56150,AT1G59870,AT1G60200,AT1G62300,AT1G62810,AT1G63500,AT1G66340,AT1G67120,AT1G68320,AT1G69935,AT1G71090,AT1G71520,AT1G73000,AT1G73730…
GO:BP	phosphate-containing compound metabolic process	GO:0006796	false	5.57947e-05	4.25341	2239	2355	304	23046	AT1G03760,AT1G04400,AT1G06520,AT1G06840,AT1G07110,AT1G07650,AT1G09970,AT1G10760,AT1G10900,AT1G10940,AT1G12230,AT1G12730,AT1G13560,AT1G13640,AT1G13700,AT1G14230,AT1G14370,AT1G15530,AT1G16130,AT1G17550,AT1G18270,AT1G18340,AT1G18390,AT1G19600,AT1G20950,AT1G21210,AT1G21920,AT1G22280,AT1G22620,AT1G24030,AT1G25390,AT1G26270,AT1G27630,AT1G30680,AT1G30820,AT1G31420,AT1G32440,AT1G34110,AT1G34210,AT1G34260…
GO:BP	response to nutrient levels	GO:0031667	false	5.82274e-05	4.23487	255	2355	55	23046	AT1G07110,AT1G07650,AT1G13300,AT1G19920,AT1G20630,AT1G21400,AT1G22500,AT1G22730,AT1G23730,AT1G29290,AT1G35350,AT1G47395,AT1G47400,AT1G54570,AT1G54710,AT1G55510,AT1G55920,AT1G58180,AT1G62300,AT1G64660,AT1G66180,AT1G67070,AT1G68320,AT1G71040,AT1G73730,AT2G03240,AT2G30766,AT2G41240,AT2G42280,AT2G45170,AT3G01090,AT3G06850,AT3G07700,AT3G11220,AT3G13450,AT3G18290,AT3G26840,AT3G47340,AT3G47640,AT3G48390…
GO:BP	circadian rhythm	GO:0007623	false	6.85544e-05	4.16396	143	2355	37	23046	AT1G04400,AT1G18330,AT1G22770,AT2G16365,AT2G21660,AT2G23080,AT2G25930,AT2G40080,AT2G46790,AT2G47890,AT3G06080,AT3G06500,AT3G07650,AT3G15620,AT3G26740,AT3G46640,AT3G48360,AT3G50000,AT3G51550,AT3G61070,AT4G02570,AT4G03390,AT4G04920,AT4G15090,AT4G26700,AT4G33980,AT5G02810,AT5G02840,AT5G10140,AT5G25830,AT5G28770,AT5G37260,AT5G42900,AT5G59570,AT5G60100,AT5G61380,AT5G67380
GO:BP	leaf senescence	GO:0010150	false	8.39461e-05	4.076	150	2355	38	23046	AT1G08620,AT1G17020,AT1G54130,AT1G54570,AT1G73680,AT2G22300,AT2G35980,AT2G39200,AT2G43790,AT3G01090,AT3G04060,AT3G10500,AT3G12130,AT3G15010,AT3G19290,AT3G27110,AT3G29035,AT3G44680,AT3G62080,AT4G02020,AT4G02380,AT4G12570,AT4G15090,AT4G23810,AT4G27410,AT4G32940,AT4G35890,AT4G36900,AT5G04870,AT5G08790,AT5G11520,AT5G14930,AT5G22070,AT5G24110,AT5G24530,AT5G39520,AT5G39610,AT5G45900
GO:BP	ncRNA processing	GO:0034470	false	0.000118957	3.92461	500	2355	89	23046	AT1G01350,AT1G01860,AT1G10490,AT1G12780,AT1G15420,AT1G16280,AT1G30240,AT1G31600,AT1G42440,AT1G45230,AT1G48920,AT1G51310,AT1G51380,AT1G55150,AT1G60000,AT1G60080,AT1G63180,AT1G63980,AT1G67120,AT1G69070,AT1G70200,AT1G80750,AT2G16650,AT2G17240,AT2G17250,AT2G24500,AT2G25355,AT2G31890,AT2G32320,AT2G37990,AT2G40570,AT2G42710,AT2G47420,AT2G47610,AT2G47990,AT3G06530,AT3G08800,AT3G10490,AT3G10530,AT3G11220…
GO:BP	response to extracellular stimulus	GO:0009991	false	0.000120359	3.91952	294	2355	60	23046	AT1G05680,AT1G07110,AT1G07650,AT1G13300,AT1G15520,AT1G19920,AT1G20630,AT1G21400,AT1G22500,AT1G22730,AT1G22810,AT1G23730,AT1G29290,AT1G35350,AT1G47395,AT1G47400,AT1G54570,AT1G54710,AT1G55510,AT1G55920,AT1G58180,AT1G62300,AT1G64660,AT1G66180,AT1G67070,AT1G68320,AT1G71040,AT1G73730,AT2G03240,AT2G30766,AT2G41240,AT2G42280,AT2G45170,AT3G01090,AT3G06850,AT3G07700,AT3G11220,AT3G13450,AT3G18290,AT3G20660…
GO:BP	phosphorylation	GO:0016310	false	0.000120933	3.91746	1593	2355	226	23046	AT1G06840,AT1G07110,AT1G07650,AT1G09970,AT1G10760,AT1G10900,AT1G10940,AT1G13640,AT1G14370,AT1G15530,AT1G16130,AT1G18270,AT1G18340,AT1G18390,AT1G19600,AT1G20950,AT1G21210,AT1G21920,AT1G24030,AT1G25390,AT1G26270,AT1G27630,AT1G31420,AT1G32440,AT1G34110,AT1G34210,AT1G34260,AT1G34300,AT1G35670,AT1G45160,AT1G48490,AT1G49160,AT1G49180,AT1G51620,AT1G51790,AT1G51800,AT1G51820,AT1G51880,AT1G51890,AT1G53090…
GO:BP	cellular response to oxygen-containing compound	GO:1901701	false	0.000124463	3.90496	797	2355	128	23046	AT1G01720,AT1G03445,AT1G05680,AT1G08830,AT1G12010,AT1G12520,AT1G13300,AT1G15380,AT1G15520,AT1G15750,AT1G17550,AT1G22430,AT1G22810,AT1G27510,AT1G32230,AT1G34210,AT1G35160,AT1G35670,AT1G49720,AT1G51800,AT1G59870,AT1G60200,AT1G61380,AT1G62810,AT1G63500,AT1G64660,AT1G66340,AT1G67120,AT1G68320,AT1G69935,AT1G73000,AT1G75750,AT1G76030,AT1G77120,AT1G78300,AT2G02740,AT2G03440,AT2G04550,AT2G15230,AT2G17820…
GO:BP	nitrogen compound metabolic process	GO:0006807	false	0.000156162	3.80643	10487	2355	1189	23046	AT1G01350,AT1G01480,AT1G01650,AT1G01720,AT1G01860,AT1G02220,AT1G02270,AT1G02300,AT1G02860,AT1G03090,AT1G03150,AT1G03280,AT1G03290,AT1G03760,AT1G03850,AT1G04170,AT1G04400,AT1G04860,AT1G04990,AT1G05560,AT1G05680,AT1G05830,AT1G05890,AT1G06150,AT1G06570,AT1G06840,AT1G07130,AT1G07650,AT1G08070,AT1G08210,AT1G08550,AT1G08620,AT1G08630,AT1G09080,AT1G09210,AT1G09230,AT1G09760,AT1G09970,AT1G10060,AT1G10070…
GO:BP	response to water	GO:0009415	false	0.000157863	3.80172	430	2355	79	23046	AT1G02930,AT1G04400,AT1G05680,AT1G07660,AT1G08930,AT1G11755,AT1G15380,AT1G15520,AT1G22810,AT1G22890,AT1G27730,AT1G28520,AT1G32230,AT1G33560,AT1G36060,AT1G43160,AT1G46768,AT1G54100,AT1G59870,AT1G60200,AT1G60650,AT1G62810,AT1G64660,AT1G65500,AT1G77120,AT1G78080,AT2G05520,AT2G16600,AT2G17820,AT2G18050,AT2G21660,AT2G30580,AT2G32150,AT2G36270,AT2G37760,AT2G37770,AT2G38340,AT2G38470,AT2G38530,AT2G41010…
GO:BP	ribonucleoprotein complex biogenesis	GO:0022613	false	0.000170144	3.76918	571	2355	98	23046	AT1G01860,AT1G04170,AT1G10490,AT1G12780,AT1G13160,AT1G15420,AT1G15470,AT1G16280,AT1G30240,AT1G30960,AT1G41880,AT1G42440,AT1G45230,AT1G48920,AT1G51380,AT1G52980,AT1G55150,AT1G60000,AT1G60080,AT1G60170,AT1G63180,AT1G63980,AT1G66070,AT1G66580,AT1G67120,AT1G69070,AT1G70200,AT1G79150,AT1G80750,AT2G03820,AT2G16950,AT2G17240,AT2G17250,AT2G18220,AT2G24500,AT2G25355,AT2G31890,AT2G32600,AT2G37990,AT2G42710…
GO:BP	export across plasma membrane	GO:0140115	false	0.000224448	3.64888	97	2355	28	23046	AT1G33100,AT1G33110,AT1G58340,AT1G59870,AT1G64820,AT1G66760,AT1G66780,AT1G71090,AT1G71140,AT2G04040,AT2G04050,AT2G04070,AT2G34360,AT2G36910,AT2G47000,AT3G21690,AT3G23560,AT3G26590,AT3G42640,AT3G62150,AT4G18160,AT4G23030,AT5G12210,AT5G52050,AT5G52450,AT5G55630,AT5G57350,AT5G65380
GO:BP	detoxification	GO:0098754	false	0.000313503	3.50376	295	2355	59	23046	AT1G02920,AT1G02930,AT1G08830,AT1G12520,AT1G15380,AT1G17170,AT1G20630,AT1G22430,AT1G33100,AT1G33110,AT1G58340,AT1G59870,AT1G64820,AT1G65970,AT1G66760,AT1G66780,AT1G69920,AT1G69930,AT1G71140,AT1G73680,AT1G77120,AT2G02390,AT2G04040,AT2G04050,AT2G04070,AT2G25080,AT2G28190,AT2G29420,AT2G29460,AT2G29490,AT2G34360,AT2G36800,AT2G41530,AT3G21690,AT3G23560,AT3G26590,AT3G28200,AT3G44300,AT3G49120,AT3G61440…
GO:BP	regulation of response to external stimulus	GO:0032101	false	0.000313927	3.50317	221	2355	48	23046	AT1G07110,AT1G09415,AT1G11960,AT1G13300,AT1G14370,AT1G33970,AT1G44350,AT1G51090,AT1G51800,AT1G59870,AT1G61380,AT2G03440,AT2G21660,AT2G22300,AT2G25620,AT2G29460,AT2G38240,AT2G41370,AT2G42280,AT2G43790,AT3G01310,AT3G06110,AT3G11220,AT3G14840,AT3G26830,AT3G29160,AT3G44480,AT3G49120,AT3G53160,AT3G55560,AT3G56410,AT3G57710,AT3G59700,AT4G02380,AT4G04920,AT4G31870,AT4G39830,AT5G03320,AT5G13080,AT5G14930…
GO:BP	response to carbohydrate	GO:0009743	false	0.000331259	3.47983	189	2355	43	23046	AT1G08830,AT1G18570,AT1G20950,AT1G21400,AT1G22500,AT1G28330,AT1G51800,AT1G59870,AT1G61800,AT1G66180,AT1G66340,AT1G67070,AT1G76030,AT1G76550,AT1G77120,AT2G19450,AT2G19860,AT2G22490,AT2G26300,AT2G28190,AT2G36270,AT3G01090,AT3G06850,AT3G11220,AT3G13450,AT3G20770,AT3G29160,AT3G29400,AT3G47340,AT3G48360,AT4G04040,AT4G15900,AT4G20260,AT5G03730,AT5G08790,AT5G24800,AT5G28770,AT5G44070,AT5G46330,AT5G49450…
GO:BP	protein phosphorylation	GO:0006468	false	0.000368371	3.43371	1183	2355	174	23046	AT1G06840,AT1G07650,AT1G09970,AT1G10940,AT1G14370,AT1G15530,AT1G16130,AT1G18340,AT1G18390,AT1G21210,AT1G24030,AT1G25390,AT1G27630,AT1G31420,AT1G34110,AT1G34210,AT1G34300,AT1G35670,AT1G45160,AT1G48490,AT1G49160,AT1G49180,AT1G51620,AT1G51790,AT1G51800,AT1G51820,AT1G51880,AT1G51890,AT1G53090,AT1G53430,AT1G53440,AT1G53720,AT1G56145,AT1G60940,AT1G61360,AT1G61380,AT1G63500,AT1G66340,AT1G66920,AT1G66980…
GO:BP	response to water deprivation	GO:0009414	false	0.000452691	3.3442	419	2355	76	23046	AT1G02930,AT1G04400,AT1G05680,AT1G07660,AT1G08930,AT1G11755,AT1G15380,AT1G15520,AT1G22810,AT1G22890,AT1G27730,AT1G28520,AT1G32230,AT1G33560,AT1G43160,AT1G46768,AT1G54100,AT1G59870,AT1G60200,AT1G60650,AT1G62810,AT1G64660,AT1G65500,AT1G77120,AT1G78080,AT2G05520,AT2G16600,AT2G17820,AT2G18050,AT2G21660,AT2G30580,AT2G32150,AT2G36270,AT2G37760,AT2G37770,AT2G38340,AT2G38470,AT2G38530,AT2G41010,AT2G41240…
GO:BP	transmembrane transport	GO:0055085	false	0.000537289	3.26979	1347	2355	193	23046	AT1G01340,AT1G02280,AT1G05300,AT1G06470,AT1G08900,AT1G08930,AT1G11260,AT1G11450,AT1G11960,AT1G14360,AT1G15520,AT1G22570,AT1G25500,AT1G25520,AT1G27770,AT1G27940,AT1G29260,AT1G30410,AT1G32090,AT1G33100,AT1G33110,AT1G35350,AT1G35670,AT1G50400,AT1G53390,AT1G53760,AT1G55900,AT1G57990,AT1G58340,AT1G59870,AT1G60160,AT1G61800,AT1G64170,AT1G64220,AT1G64820,AT1G66760,AT1G66780,AT1G68730,AT1G69850,AT1G70480…
GO:BP	intracellular signal transduction	GO:0035556	false	0.000556362	3.25464	616	2355	102	23046	AT1G10940,AT1G13260,AT1G21910,AT1G22810,AT1G32230,AT1G35670,AT1G36060,AT1G43160,AT1G45160,AT1G46768,AT1G48490,AT1G49160,AT1G50640,AT1G60940,AT1G62300,AT1G66340,AT1G71520,AT1G73730,AT1G77640,AT1G78080,AT1G78290,AT2G04550,AT2G17820,AT2G18170,AT2G23030,AT2G29110,AT2G29120,AT2G29680,AT2G32390,AT2G33710,AT2G41110,AT2G42160,AT2G43790,AT2G46310,AT2G46790,AT2G47520,AT3G01090,AT3G04110,AT3G06110,AT3G06620…
GO:BP	response to absence of light	GO:0009646	false	0.000559321	3.25234	44	2355	17	23046	AT1G04400,AT1G21400,AT1G22730,AT1G58340,AT1G67070,AT2G43400,AT3G06850,AT3G13450,AT3G47340,AT3G48390,AT4G02380,AT4G24230,AT4G33950,AT4G33980,AT5G18170,AT5G20230,AT5G42900
GO:BP	transport	GO:0006810	false	0.000598334	3.22306	2682	2355	348	23046	AT1G01340,AT1G01910,AT1G02280,AT1G05300,AT1G06470,AT1G07140,AT1G08900,AT1G08930,AT1G09270,AT1G09330,AT1G11260,AT1G11450,AT1G11890,AT1G11960,AT1G13160,AT1G13210,AT1G13340,AT1G14360,AT1G15500,AT1G15520,AT1G16510,AT1G18200,AT1G21900,AT1G22570,AT1G23020,AT1G25500,AT1G25520,AT1G27770,AT1G27940,AT1G27970,AT1G29060,AT1G29260,AT1G29290,AT1G30410,AT1G32050,AT1G32090,AT1G33040,AT1G33100,AT1G33110,AT1G34220…
GO:BP	alpha-amino acid metabolic process	GO:1901605	false	0.000630283	3.20046	329	2355	63	23046	AT1G01480,AT1G03090,AT1G06570,AT1G08630,AT1G10060,AT1G10070,AT1G15040,AT1G15710,AT1G16460,AT1G18500,AT1G30820,AT1G48420,AT1G51720,AT1G55920,AT1G63660,AT1G64660,AT1G66230,AT1G72330,AT1G79440,AT2G02390,AT2G05830,AT2G16500,AT2G22250,AT2G26300,AT2G31810,AT2G40000,AT2G43400,AT2G44160,AT3G03630,AT3G04940,AT3G10050,AT3G22200,AT3G22460,AT3G30775,AT3G45300,AT3G47340,AT3G53180,AT3G55610,AT3G55840,AT3G59970…
GO:BP	response to light intensity	GO:0009642	false	0.000643716	3.19131	143	2355	35	23046	AT1G04400,AT1G08830,AT1G10170,AT1G11755,AT1G21400,AT1G22730,AT1G27730,AT1G58340,AT1G61800,AT1G67070,AT1G69935,AT1G77510,AT2G26300,AT2G28190,AT2G43400,AT3G03380,AT3G03630,AT3G06850,AT3G13450,AT3G15850,AT3G28910,AT3G47340,AT3G48390,AT4G02380,AT4G04850,AT4G17490,AT4G24230,AT4G33950,AT4G33980,AT5G18170,AT5G20230,AT5G42900,AT5G58070,AT5G59820,AT5G61230
GO:BP	response to cold	GO:0009409	false	0.000654988	3.18377	401	2355	73	23046	AT1G01860,AT1G08930,AT1G10760,AT1G15380,AT1G15520,AT1G21910,AT1G22770,AT1G22890,AT1G27730,AT1G28520,AT1G43160,AT1G46768,AT1G60170,AT1G60650,AT1G65500,AT1G70200,AT1G77120,AT1G78080,AT1G79440,AT2G03440,AT2G16500,AT2G19450,AT2G21660,AT2G22300,AT2G24500,AT2G25930,AT2G36270,AT2G37760,AT2G37770,AT2G38470,AT2G39810,AT2G40140,AT2G43790,AT2G45660,AT3G08730,AT3G14080,AT3G17020,AT3G18990,AT3G22330,AT3G22370…
GO:BP	xenobiotic detoxification by transmembrane export across the plasma membrane	GO:1990961	false	0.000896999	3.04721	50	2355	18	23046	AT1G33100,AT1G33110,AT1G58340,AT1G64820,AT1G66760,AT1G66780,AT1G71140,AT2G04040,AT2G04050,AT2G04070,AT2G34360,AT3G21690,AT3G23560,AT3G26590,AT4G23030,AT5G52050,AT5G52450,AT5G65380
GO:BP	xenobiotic export from cell	GO:0046618	false	0.000896999	3.04721	50	2355	18	23046	AT1G33100,AT1G33110,AT1G58340,AT1G64820,AT1G66760,AT1G66780,AT1G71140,AT2G04040,AT2G04050,AT2G04070,AT2G34360,AT3G21690,AT3G23560,AT3G26590,AT4G23030,AT5G52050,AT5G52450,AT5G65380
GO:BP	response to wounding	GO:0009611	false	0.00110462	2.95679	237	2355	49	23046	AT1G01720,AT1G15380,AT1G19020,AT1G21120,AT1G27730,AT1G32920,AT1G43160,AT1G61340,AT1G62810,AT1G66760,AT1G73260,AT1G76680,AT1G78080,AT1G80840,AT2G33150,AT2G38870,AT2G42490,AT3G01310,AT3G13790,AT3G14050,AT3G14840,AT3G15356,AT3G25250,AT3G29035,AT3G48360,AT3G51440,AT3G54150,AT3G61060,AT3G61190,AT4G02020,AT4G02380,AT4G16760,AT4G24220,AT4G32940,AT4G35770,AT5G05730,AT5G06320,AT5G08790,AT5G09810,AT5G43570…
GO:BP	regulation of defense response	GO:0031347	false	0.00110775	2.95556	285	2355	56	23046	AT1G02660,AT1G09415,AT1G11310,AT1G11960,AT1G14370,AT1G33970,AT1G44350,AT1G51090,AT1G51800,AT1G59870,AT1G61380,AT1G80840,AT2G02220,AT2G03440,AT2G18950,AT2G21660,AT2G22300,AT2G25000,AT2G25620,AT2G29460,AT2G38240,AT2G41370,AT2G43790,AT3G01310,AT3G06110,AT3G14840,AT3G26830,AT3G29160,AT3G44480,AT3G49120,AT3G53160,AT3G55560,AT3G56410,AT3G57710,AT3G59700,AT3G61190,AT4G02380,AT4G02550,AT4G04920,AT4G08480…
GO:BP	establishment of localization	GO:0051234	false	0.00112064	2.95053	2726	2355	351	23046	AT1G01340,AT1G01910,AT1G02280,AT1G05300,AT1G06470,AT1G07140,AT1G08900,AT1G08930,AT1G09270,AT1G09330,AT1G11260,AT1G11450,AT1G11890,AT1G11960,AT1G13160,AT1G13210,AT1G13340,AT1G14360,AT1G15500,AT1G15520,AT1G16510,AT1G18200,AT1G21900,AT1G22570,AT1G23020,AT1G25500,AT1G25520,AT1G27770,AT1G27940,AT1G27970,AT1G29060,AT1G29260,AT1G29290,AT1G30410,AT1G32050,AT1G32090,AT1G33040,AT1G33100,AT1G33110,AT1G34220…
GO:BP	amino acid metabolic process	GO:0006520	false	0.00119647	2.9221	459	2355	80	23046	AT1G01480,AT1G03090,AT1G05560,AT1G06570,AT1G08630,AT1G10060,AT1G10070,AT1G15040,AT1G15710,AT1G16460,AT1G17960,AT1G18500,AT1G21400,AT1G22410,AT1G30820,AT1G35580,AT1G48420,AT1G51720,AT1G55510,AT1G55920,AT1G63660,AT1G64660,AT1G66230,AT1G70980,AT1G72330,AT1G79440,AT2G02390,AT2G05830,AT2G16500,AT2G22250,AT2G26300,AT2G31810,AT2G38210,AT2G40000,AT2G43400,AT2G43820,AT2G43840,AT2G44160,AT3G03630,AT3G04940…
GO:BP	immune system process	GO:0002376	false	0.0017451	2.75818	289	2355	56	23046	AT1G02860,AT1G09970,AT1G11960,AT1G12220,AT1G18570,AT1G33560,AT1G59870,AT1G61360,AT1G61380,AT1G66980,AT1G67470,AT1G77630,AT2G02220,AT2G17520,AT2G21660,AT2G23270,AT2G26560,AT2G33340,AT2G41370,AT2G43790,AT3G01310,AT3G03970,AT3G06110,AT3G14840,AT3G16030,AT3G21220,AT3G28910,AT3G29400,AT3G44480,AT3G46530,AT3G49120,AT3G50480,AT3G50930,AT3G52450,AT3G53160,AT3G55560,AT3G61440,AT4G08480,AT4G12470,AT4G12480…
GO:BP	xenobiotic transport	GO:0042908	false	0.00191201	2.71851	73	2355	22	23046	AT1G30410,AT1G33100,AT1G33110,AT1G58340,AT1G64820,AT1G66760,AT1G66780,AT1G71140,AT2G04040,AT2G04050,AT2G04070,AT2G34360,AT2G47000,AT3G13080,AT3G21250,AT3G21690,AT3G23560,AT3G26590,AT4G23030,AT5G52050,AT5G52450,AT5G65380
GO:BP	branched-chain amino acid catabolic process	GO:0009083	true	0.00275709	2.55955	26	2355	12	23046	AT1G03090,AT1G10060,AT1G21400,AT1G55510,AT2G43400,AT3G13450,AT3G45300,AT3G60510,AT4G16800,AT4G20930,AT4G34030,AT5G65940
GO:BP	ncRNA metabolic process	GO:0034660	false	0.00297203	2.52695	592	2355	96	23046	AT1G01350,AT1G01860,AT1G10490,AT1G12780,AT1G15420,AT1G16280,AT1G17960,AT1G30240,AT1G31600,AT1G42440,AT1G45230,AT1G48920,AT1G51310,AT1G51380,AT1G55150,AT1G60000,AT1G60080,AT1G63180,AT1G63980,AT1G67120,AT1G69070,AT1G70200,AT1G70980,AT1G80750,AT2G02955,AT2G16650,AT2G17240,AT2G17250,AT2G24500,AT2G25355,AT2G31890,AT2G32320,AT2G37990,AT2G40570,AT2G42710,AT2G47420,AT2G47610,AT2G47990,AT3G06530,AT3G08800…
GO:BP	anaerobic respiration	GO:0009061	true	0.00307826	2.51169	9	2355	7	23046	AT1G05575,AT1G19530,AT1G33055,AT2G36220,AT2G41730,AT3G10020,AT5G15120
GO:BP	immune response	GO:0006955	false	0.00424791	2.37182	283	2355	54	23046	AT1G02860,AT1G09970,AT1G11960,AT1G12220,AT1G18570,AT1G33560,AT1G59870,AT1G61360,AT1G61380,AT1G66980,AT1G67470,AT1G77630,AT2G02220,AT2G21660,AT2G23270,AT2G26560,AT2G33340,AT2G41370,AT2G43790,AT3G01310,AT3G03970,AT3G06110,AT3G14840,AT3G16030,AT3G21220,AT3G28910,AT3G29400,AT3G44480,AT3G46530,AT3G49120,AT3G50480,AT3G50930,AT3G53160,AT3G55560,AT3G61440,AT4G08480,AT4G12470,AT4G12480,AT4G12560,AT4G15900…
GO:BP	regulation of leaf senescence	GO:1900055	false	0.00441125	2.35544	50	2355	17	23046	AT1G08620,AT3G01090,AT3G04060,AT3G12130,AT3G19290,AT3G27110,AT3G29035,AT3G44680,AT4G02020,AT4G02380,AT4G15090,AT4G27410,AT4G36900,AT5G04870,AT5G14930,AT5G22070,AT5G39610
GO:BP	response to nitrogen compound	GO:1901698	false	0.00576113	2.23949	223	2355	45	23046	AT1G02860,AT1G09080,AT1G09210,AT1G13300,AT1G27730,AT1G30000,AT1G51800,AT1G59870,AT1G61340,AT1G62810,AT1G69890,AT1G77120,AT2G21210,AT2G22300,AT2G29110,AT2G29120,AT2G32390,AT2G37430,AT2G43790,AT2G44410,AT3G04110,AT3G15356,AT3G16530,AT3G21670,AT3G44300,AT3G45060,AT3G46080,AT3G46090,AT3G48360,AT3G61440,AT3G62930,AT4G03510,AT4G04180,AT4G08480,AT4G14430,AT4G15660,AT4G15700,AT4G21680,AT4G27470,AT5G07340…
GO:BP	detection of stimulus	GO:0051606	false	0.00610015	2.21466	95	2355	25	23046	AT1G18490,AT1G22770,AT1G28520,AT1G53090,AT1G61380,AT1G66340,AT2G01940,AT2G25930,AT2G26990,AT2G40080,AT2G48060,AT3G01090,AT3G15354,AT3G17609,AT3G51920,AT4G10180,AT4G16250,AT4G18710,AT4G32040,AT5G14250,AT5G15120,AT5G20480,AT5G24270,AT5G39890,AT5G46330
GO:BP	response to light stimulus	GO:0009416	false	0.00628566	2.20165	777	2355	118	23046	AT1G04400,AT1G08830,AT1G10170,AT1G11755,AT1G15380,AT1G15510,AT1G20630,AT1G21400,AT1G21920,AT1G22280,AT1G22500,AT1G22730,AT1G22770,AT1G27730,AT1G28520,AT1G30810,AT1G32870,AT1G37130,AT1G44090,AT1G53090,AT1G58340,AT1G61800,AT1G66180,AT1G66580,AT1G67070,AT1G69935,AT1G77510,AT1G77760,AT1G78080,AT1G78600,AT1G79440,AT1G80920,AT2G02710,AT2G06040,AT2G16365,AT2G23080,AT2G25930,AT2G26300,AT2G26670,AT2G26990…
GO:BP	export from cell	GO:0140352	false	0.00763883	2.11697	178	2355	38	23046	AT1G09330,AT1G33100,AT1G33110,AT1G54090,AT1G58340,AT1G59870,AT1G64820,AT1G66760,AT1G66780,AT1G71090,AT1G71140,AT1G71820,AT2G04040,AT2G04050,AT2G04070,AT2G29940,AT2G34360,AT2G36910,AT2G47000,AT3G09900,AT3G10380,AT3G21690,AT3G23560,AT3G26590,AT3G29400,AT3G42640,AT3G52400,AT3G62150,AT4G18160,AT4G23030,AT4G34450,AT5G12210,AT5G52050,AT5G52450,AT5G55630,AT5G57350,AT5G61010,AT5G65380
GO:BP	response to ethylene	GO:0009723	false	0.00814079	2.08933	282	2355	53	23046	AT1G13260,AT1G15520,AT1G21910,AT1G22810,AT1G32230,AT1G36060,AT1G43160,AT1G46768,AT1G50640,AT1G62300,AT1G66340,AT1G68765,AT1G71520,AT1G73730,AT1G77640,AT1G78080,AT2G05520,AT2G33710,AT2G43790,AT2G46310,AT2G47520,AT3G05420,AT3G15356,AT3G16770,AT3G20770,AT3G50260,AT3G50480,AT3G51440,AT3G51550,AT3G61630,AT4G02380,AT4G02570,AT4G04920,AT4G06746,AT4G17490,AT4G27950,AT4G32040,AT4G32800,AT4G32940,AT4G36900…
GO:BP	phosphorelay signal transduction system	GO:0000160	false	0.00841677	2.07485	254	2355	49	23046	AT1G13260,AT1G21910,AT1G22810,AT1G32230,AT1G36060,AT1G43160,AT1G46768,AT1G50640,AT1G62300,AT1G66340,AT1G71520,AT1G73730,AT1G77640,AT1G78080,AT2G17820,AT2G33710,AT2G46310,AT2G46790,AT2G47520,AT3G15356,AT3G16770,AT3G20770,AT3G50260,AT3G51550,AT3G61630,AT4G02570,AT4G04920,AT4G06746,AT4G16250,AT4G17490,AT4G27950,AT4G32800,AT4G36900,AT4G38495,AT4G39780,AT5G02810,AT5G03730,AT5G05550,AT5G13330,AT5G22270…
GO:BP	regulation of response to biotic stimulus	GO:0002831	false	0.00885281	2.05292	206	2355	42	23046	AT1G09415,AT1G11960,AT1G14370,AT1G33970,AT1G44350,AT1G51090,AT1G51800,AT1G59870,AT1G61380,AT2G03440,AT2G21660,AT2G22300,AT2G25620,AT2G29460,AT2G38240,AT2G41370,AT2G43790,AT3G01310,AT3G06110,AT3G14840,AT3G26830,AT3G29160,AT3G44480,AT3G49120,AT3G53160,AT3G55560,AT3G56410,AT3G57710,AT3G59700,AT4G02380,AT4G04920,AT4G31870,AT4G39830,AT5G03320,AT5G14930,AT5G25440,AT5G39610,AT5G44585,AT5G50780,AT5G52810…
GO:BP	positive regulation of response to stimulus	GO:0048584	false	0.0103089	1.98679	270	2355	51	23046	AT1G02660,AT1G03445,AT1G11960,AT1G14370,AT1G21920,AT1G22770,AT1G28520,AT1G29060,AT1G32870,AT1G35670,AT1G51800,AT1G59870,AT1G61380,AT1G66230,AT1G69935,AT1G77120,AT2G03440,AT2G22300,AT2G26300,AT2G29460,AT2G33150,AT2G41370,AT2G43790,AT3G01090,AT3G01310,AT3G14990,AT3G44480,AT3G49120,AT3G53160,AT3G57300,AT3G57710,AT4G04920,AT4G23450,AT4G31870,AT4G33950,AT4G39070,AT4G39830,AT5G03320,AT5G14930,AT5G18200…
GO:BP	negative regulation of nitrogen compound metabolic process	GO:0051172	false	0.0124521	1.90476	480	2355	79	23046	AT1G03760,AT1G03850,AT1G13260,AT1G13300,AT1G14900,AT1G15750,AT1G18070,AT1G22730,AT1G24190,AT1G27730,AT1G60080,AT1G60650,AT1G62300,AT1G65070,AT1G66230,AT1G68320,AT1G70060,AT1G72060,AT1G73260,AT1G79950,AT1G80840,AT2G04550,AT2G18050,AT2G18290,AT2G25355,AT2G25930,AT2G30400,AT2G32550,AT2G36026,AT2G36080,AT2G38870,AT2G39810,AT2G40080,AT2G42810,AT2G43510,AT2G46790,AT2G47210,AT3G02140,AT3G02830,AT3G06110…
GO:BP	ethylene-activated signaling pathway	GO:0009873	false	0.0125647	1.90085	202	2355	41	23046	AT1G13260,AT1G21910,AT1G22810,AT1G32230,AT1G36060,AT1G43160,AT1G46768,AT1G50640,AT1G62300,AT1G66340,AT1G71520,AT1G73730,AT1G77640,AT1G78080,AT2G33710,AT2G46310,AT2G47520,AT3G15356,AT3G16770,AT3G20770,AT3G50260,AT3G51550,AT3G61630,AT4G02570,AT4G04920,AT4G06746,AT4G17490,AT4G27950,AT4G32800,AT4G36900,AT4G38495,AT4G39780,AT5G03730,AT5G05550,AT5G13330,AT5G22270,AT5G47230,AT5G59430,AT5G61600,AT5G65130…
GO:BP	cellular response to ethylene stimulus	GO:0071369	false	0.0128095	1.89247	209	2355	42	23046	AT1G13260,AT1G21910,AT1G22810,AT1G32230,AT1G36060,AT1G43160,AT1G46768,AT1G50640,AT1G62300,AT1G66340,AT1G71520,AT1G73730,AT1G77640,AT1G78080,AT2G33710,AT2G46310,AT2G47520,AT3G15356,AT3G16770,AT3G20770,AT3G50260,AT3G51550,AT3G61630,AT4G02570,AT4G04920,AT4G06746,AT4G17490,AT4G27950,AT4G32040,AT4G32800,AT4G36900,AT4G38495,AT4G39780,AT5G03730,AT5G05550,AT5G13330,AT5G22270,AT5G47230,AT5G59430,AT5G61600…
GO:BP	response to chitin	GO:0010200	false	0.0132694	1.87715	21	2355	10	23046	AT1G27730,AT1G51800,AT1G59870,AT2G21210,AT2G37430,AT3G15356,AT3G16530,AT3G46080,AT3G46090,AT5G59820
GO:BP	response to starvation	GO:0042594	false	0.0142132	1.84731	203	2355	41	23046	AT1G13300,AT1G19920,AT1G20630,AT1G21400,AT1G22730,AT1G29290,AT1G35350,AT1G47395,AT1G47400,AT1G54570,AT1G54710,AT1G55920,AT1G62300,AT1G64660,AT1G68320,AT1G71040,AT1G73730,AT2G03240,AT2G30766,AT2G41240,AT2G45170,AT3G06850,AT3G07700,AT3G13450,AT3G18290,AT3G26840,AT3G47340,AT3G47640,AT3G48390,AT3G55880,AT3G56970,AT3G56980,AT4G00550,AT4G04620,AT4G20260,AT4G27460,AT5G18200,AT5G26880,AT5G28770,AT5G45900…
GO:BP	cell death	GO:0008219	false	0.014628	1.83482	217	2355	43	23046	AT1G02860,AT1G12220,AT1G27510,AT1G32230,AT1G33560,AT1G59870,AT1G73260,AT2G01290,AT2G19860,AT2G26300,AT2G26560,AT2G41560,AT2G43790,AT3G06110,AT3G06490,AT3G15010,AT3G16770,AT3G21220,AT3G25250,AT3G27060,AT3G28910,AT3G44480,AT3G46530,AT3G50260,AT3G50480,AT3G50930,AT3G63310,AT4G08540,AT4G12470,AT4G12560,AT4G16660,AT4G19700,AT4G25110,AT4G33430,AT5G04870,AT5G14930,AT5G19400,AT5G20480,AT5G39610,AT5G42050…
GO:BP	post-embryonic development	GO:0009791	false	0.0151394	1.81989	1650	2355	220	23046	AT1G01550,AT1G04400,AT1G05830,AT1G08300,AT1G09230,AT1G09970,AT1G13260,AT1G15520,AT1G15750,AT1G16280,AT1G16460,AT1G19080,AT1G21210,AT1G21410,AT1G21920,AT1G22770,AT1G28240,AT1G28520,AT1G30610,AT1G30810,AT1G30970,AT1G31814,AT1G32230,AT1G32440,AT1G32500,AT1G44090,AT1G47200,AT1G48920,AT1G53090,AT1G53330,AT1G55170,AT1G56010,AT1G56200,AT1G59870,AT1G60160,AT1G60170,AT1G60940,AT1G66340,AT1G66650,AT1G67170…
GO:BP	positive regulation of response to external stimulus	GO:0032103	false	0.0158338	1.80042	106	2355	26	23046	AT1G11960,AT1G14370,AT1G51800,AT1G59870,AT1G61380,AT2G03440,AT2G22300,AT2G29460,AT2G41370,AT2G43790,AT3G01310,AT3G44480,AT3G49120,AT3G53160,AT3G57710,AT4G04920,AT4G31870,AT4G39830,AT5G03320,AT5G14930,AT5G18200,AT5G25440,AT5G39610,AT5G50780,AT5G52810,AT5G59890
GO:BP	organic cyclic compound metabolic process	GO:1901360	false	0.0172025	1.76441	5797	2355	676	23046	AT1G01350,AT1G01720,AT1G01860,AT1G02220,AT1G02270,AT1G02860,AT1G03280,AT1G03290,AT1G03760,AT1G03850,AT1G04400,AT1G04990,AT1G05160,AT1G05560,AT1G05680,AT1G05830,AT1G06150,AT1G06570,AT1G07130,AT1G07730,AT1G08070,AT1G08550,AT1G08620,AT1G09230,AT1G09760,AT1G10170,AT1G10490,AT1G12230,AT1G12780,AT1G13260,AT1G13300,AT1G13700,AT1G14210,AT1G14230,AT1G14900,AT1G15200,AT1G15420,AT1G15470,AT1G15480,AT1G15510…
GO:BP	organonitrogen compound catabolic process	GO:1901565	false	0.0177062	1.75187	868	2355	127	23046	AT1G02300,AT1G03090,AT1G04860,AT1G05890,AT1G06570,AT1G08630,AT1G09080,AT1G09210,AT1G10060,AT1G21400,AT1G21410,AT1G30000,AT1G47570,AT1G48420,AT1G53780,AT1G55510,AT1G59870,AT1G62810,AT1G64660,AT1G66650,AT1G67550,AT1G71980,AT1G72330,AT1G76970,AT1G78870,AT1G79440,AT2G02390,AT2G06040,AT2G14740,AT2G16500,AT2G18290,AT2G21430,AT2G26670,AT2G26990,AT2G31510,AT2G32150,AT2G34080,AT2G36370,AT2G37680,AT2G40000…
GO:BP	cellular response to lipid	GO:0071396	false	0.0188866	1.72385	595	2355	93	23046	AT1G01720,AT1G03445,AT1G05680,AT1G12010,AT1G13300,AT1G15380,AT1G15520,AT1G15750,AT1G17550,AT1G32230,AT1G34210,AT1G35160,AT1G35670,AT1G49720,AT1G51800,AT1G60200,AT1G61380,AT1G62810,AT1G63500,AT1G67120,AT1G68320,AT1G69935,AT1G73000,AT1G75750,AT1G78300,AT2G03440,AT2G04550,AT2G15230,AT2G17820,AT2G25770,AT2G26300,AT2G26980,AT2G29940,AT2G33150,AT2G34070,AT2G36270,AT2G38240,AT2G38340,AT2G39840,AT2G40330…
GO:BP	organic anion transport	GO:0015711	true	0.0189179	1.72313	145	2355	32	23046	AT1G06470,AT1G14360,AT1G15500,AT1G15520,AT1G61800,AT1G69850,AT1G80300,AT1G80510,AT2G02810,AT2G06925,AT2G29940,AT2G36590,AT2G40420,AT3G19490,AT3G21260,AT3G21390,AT3G51870,AT3G59360,AT4G00370,AT4G21120,AT4G24570,AT4G28390,AT4G38250,AT5G12170,AT5G13490,AT5G17400,AT5G19380,AT5G42420,AT5G47560,AT5G48970,AT5G52050,AT5G65000
GO:BP	cellular response to abscisic acid stimulus	GO:0071215	false	0.0205108	1.68802	313	2355	56	23046	AT1G01720,AT1G05680,AT1G13300,AT1G15380,AT1G15520,AT1G17550,AT1G35670,AT1G49720,AT1G51800,AT1G60200,AT1G62810,AT1G67120,AT1G69935,AT1G73000,AT2G03440,AT2G04550,AT2G17820,AT2G25770,AT2G26300,AT2G26980,AT2G29940,AT2G33150,AT2G36270,AT2G38340,AT2G40330,AT2G40340,AT2G43140,AT2G43790,AT2G44340,AT3G01090,AT3G02140,AT3G04110,AT3G06380,AT3G07360,AT3G11220,AT3G19290,AT3G21220,AT3G46550,AT3G46620,AT3G46820…
GO:BP	cellular response to alcohol	GO:0097306	false	0.0205108	1.68802	313	2355	56	23046	AT1G01720,AT1G05680,AT1G13300,AT1G15380,AT1G15520,AT1G17550,AT1G35670,AT1G49720,AT1G51800,AT1G60200,AT1G62810,AT1G67120,AT1G69935,AT1G73000,AT2G03440,AT2G04550,AT2G17820,AT2G25770,AT2G26300,AT2G26980,AT2G29940,AT2G33150,AT2G36270,AT2G38340,AT2G40330,AT2G40340,AT2G43140,AT2G43790,AT2G44340,AT3G01090,AT3G02140,AT3G04110,AT3G06380,AT3G07360,AT3G11220,AT3G19290,AT3G21220,AT3G46550,AT3G46620,AT3G46820…
GO:BP	cellular carbohydrate metabolic process	GO:0044262	false	0.0206155	1.68581	510	2355	82	23046	AT1G02640,AT1G06410,AT1G07110,AT1G10760,AT1G12780,AT1G20950,AT1G22880,AT1G23870,AT1G27930,AT1G28240,AT1G31420,AT1G32170,AT1G35580,AT1G47510,AT1G48300,AT1G55850,AT1G56560,AT1G60140,AT1G63180,AT1G65580,AT1G65610,AT1G66980,AT1G69830,AT1G71710,AT1G76550,AT1G78240,AT2G01940,AT2G15390,AT2G18700,AT2G19450,AT2G19800,AT2G19860,AT2G25450,AT2G28110,AT2G32530,AT2G37680,AT3G01090,AT3G01310,AT3G01640,AT3G01850…
GO:BP	root morphogenesis	GO:0010015	false	0.0210761	1.67621	328	2355	58	23046	AT1G01910,AT1G21410,AT1G32230,AT1G34110,AT1G49240,AT1G52240,AT1G58340,AT1G59870,AT1G68320,AT1G68765,AT1G71090,AT1G75110,AT1G75120,AT1G78870,AT2G35510,AT2G42490,AT2G43790,AT2G45160,AT2G47000,AT3G02240,AT3G05090,AT3G06440,AT3G06810,AT3G11260,AT3G16640,AT3G20630,AT3G21220,AT3G27560,AT3G29100,AT3G44600,AT3G46110,AT3G53180,AT3G61440,AT4G07410,AT4G14430,AT4G18710,AT4G28710,AT4G31230,AT4G33495,AT4G35020…
GO:BP	localization	GO:0051179	false	0.0225977	1.64594	2962	2355	367	23046	AT1G01340,AT1G01910,AT1G02280,AT1G03445,AT1G05300,AT1G06470,AT1G07140,AT1G08900,AT1G08930,AT1G09270,AT1G09330,AT1G11260,AT1G11450,AT1G11890,AT1G11960,AT1G12730,AT1G13160,AT1G13210,AT1G13340,AT1G14360,AT1G15290,AT1G15500,AT1G15520,AT1G16510,AT1G18200,AT1G18570,AT1G21900,AT1G22570,AT1G23020,AT1G25500,AT1G25520,AT1G27770,AT1G27940,AT1G27970,AT1G29060,AT1G29260,AT1G29290,AT1G30410,AT1G32050,AT1G32090…
GO:BP	positive regulation of response to biotic stimulus	GO:0002833	false	0.0230986	1.63641	102	2355	25	23046	AT1G11960,AT1G14370,AT1G51800,AT1G59870,AT1G61380,AT2G03440,AT2G22300,AT2G29460,AT2G41370,AT2G43790,AT3G01310,AT3G44480,AT3G49120,AT3G53160,AT3G57710,AT4G04920,AT4G31870,AT4G39830,AT5G03320,AT5G14930,AT5G25440,AT5G39610,AT5G50780,AT5G52810,AT5G59890
GO:BP	response to radiation	GO:0009314	false	0.0241449	1.61717	800	2355	118	23046	AT1G04400,AT1G08830,AT1G10170,AT1G11755,AT1G15380,AT1G15510,AT1G20630,AT1G21400,AT1G21920,AT1G22280,AT1G22500,AT1G22730,AT1G22770,AT1G27730,AT1G28520,AT1G30810,AT1G32870,AT1G37130,AT1G44090,AT1G53090,AT1G58340,AT1G61800,AT1G66180,AT1G66580,AT1G67070,AT1G69935,AT1G77510,AT1G77760,AT1G78080,AT1G78600,AT1G79440,AT1G80920,AT2G02710,AT2G06040,AT2G16365,AT2G23080,AT2G25930,AT2G26300,AT2G26670,AT2G26990…
GO:BP	regulation of circadian rhythm	GO:0042752	false	0.0241702	1.61672	56	2355	17	23046	AT1G04400,AT1G22770,AT2G23080,AT2G25930,AT2G40080,AT3G15620,AT3G46640,AT3G50000,AT4G02570,AT4G15090,AT4G33980,AT5G02840,AT5G10140,AT5G28770,AT5G42900,AT5G60100,AT5G67380
GO:BP	response to fatty acid	GO:0070542	false	0.025939	1.58605	229	2355	44	23046	AT1G12010,AT1G15380,AT1G15520,AT1G15750,AT1G21910,AT1G32230,AT1G43160,AT1G44350,AT1G47510,AT1G61340,AT1G62810,AT2G34070,AT2G38240,AT2G40330,AT2G41370,AT2G42490,AT2G43790,AT2G45950,AT2G46400,AT3G05420,AT3G15356,AT3G15500,AT3G15510,AT3G16770,AT3G48360,AT3G50480,AT3G51440,AT3G61415,AT4G02570,AT4G04920,AT4G12570,AT4G20860,AT4G23810,AT4G32940,AT4G35770,AT4G35890,AT5G06600,AT5G07010,AT5G08790,AT5G13330…
GO:BP	organonitrogen compound metabolic process	GO:1901564	false	0.0261296	1.58287	6333	2355	731	23046	AT1G01480,AT1G01650,AT1G02300,AT1G02860,AT1G03090,AT1G03150,AT1G04170,AT1G04400,AT1G04860,AT1G05560,AT1G05680,AT1G05830,AT1G05890,AT1G06570,AT1G06840,AT1G07650,AT1G08210,AT1G08550,AT1G08620,AT1G08630,AT1G09080,AT1G09210,AT1G09970,AT1G10060,AT1G10070,AT1G10170,AT1G10600,AT1G10940,AT1G11755,AT1G12230,AT1G12730,AT1G12750,AT1G13270,AT1G13560,AT1G13700,AT1G14205,AT1G14370,AT1G15040,AT1G15530,AT1G15710…
GO:BP	response to heat	GO:0009408	false	0.0299483	1.52363	266	2355	49	23046	AT1G08550,AT1G15380,AT1G15520,AT1G16030,AT1G21910,AT1G28210,AT1G28520,AT1G43160,AT1G53540,AT1G58340,AT1G59870,AT1G66340,AT1G67970,AT1G78080,AT1G79440,AT1G80030,AT2G03440,AT2G22360,AT2G23980,AT2G25140,AT2G28840,AT2G38340,AT2G38470,AT2G40340,AT3G11020,AT3G16770,AT3G46230,AT3G51910,AT3G61190,AT4G13550,AT4G15802,AT4G18870,AT4G18880,AT4G21320,AT4G21870,AT4G26780,AT4G35987,AT4G38580,AT5G03720,AT5G05410…
GO:BP	positive regulation of defense response	GO:0031349	false	0.0316239	1.49998	110	2355	26	23046	AT1G02660,AT1G11960,AT1G14370,AT1G51800,AT1G59870,AT1G61380,AT2G03440,AT2G22300,AT2G29460,AT2G41370,AT2G43790,AT3G01310,AT3G44480,AT3G49120,AT3G53160,AT3G57710,AT4G04920,AT4G31870,AT4G39830,AT5G03320,AT5G14930,AT5G25440,AT5G39610,AT5G50780,AT5G52810,AT5G59890
GO:BP	response to jasmonic acid	GO:0009753	false	0.0362658	1.4405	225	2355	43	23046	AT1G15380,AT1G15520,AT1G15750,AT1G21910,AT1G32230,AT1G43160,AT1G44350,AT1G47510,AT1G61340,AT1G62810,AT2G34070,AT2G38240,AT2G40330,AT2G41370,AT2G42490,AT2G43790,AT2G45950,AT2G46400,AT3G05420,AT3G15356,AT3G15500,AT3G15510,AT3G16770,AT3G48360,AT3G50480,AT3G51440,AT3G61415,AT4G02570,AT4G04920,AT4G12570,AT4G20860,AT4G23810,AT4G32940,AT4G35770,AT4G35890,AT5G06600,AT5G07010,AT5G08790,AT5G13330,AT5G27380…
GO:BP	lateral root development	GO:0048527	true	0.0364011	1.43889	143	2355	31	23046	AT1G13260,AT1G21210,AT1G21410,AT1G32230,AT1G47200,AT1G56010,AT1G59870,AT1G60940,AT1G68765,AT1G69935,AT1G71090,AT2G35510,AT2G42490,AT2G46400,AT3G02240,AT3G05090,AT3G07360,AT3G16640,AT3G22942,AT3G53180,AT4G07410,AT4G33495,AT4G37060,AT4G37295,AT5G05730,AT5G09680,AT5G13080,AT5G39610,AT5G45710,AT5G57280,AT5G65510
GO:BP	cellular aromatic compound metabolic process	GO:0006725	false	0.0380732	1.41938	5664	2355	658	23046	AT1G01350,AT1G01720,AT1G01860,AT1G02220,AT1G02270,AT1G02860,AT1G03280,AT1G03290,AT1G03760,AT1G03850,AT1G04400,AT1G04990,AT1G05560,AT1G05680,AT1G05830,AT1G06150,AT1G06570,AT1G07130,AT1G07730,AT1G08070,AT1G08550,AT1G08620,AT1G09230,AT1G09760,AT1G10170,AT1G10490,AT1G12230,AT1G12780,AT1G13260,AT1G13300,AT1G13700,AT1G14210,AT1G14230,AT1G14900,AT1G15200,AT1G15420,AT1G15470,AT1G15480,AT1G15510,AT1G15670…
GO:BP	cellular response to starvation	GO:0009267	false	0.041817	1.37865	164	2355	34	23046	AT1G13300,AT1G19920,AT1G20630,AT1G21400,AT1G29290,AT1G35350,AT1G54570,AT1G55920,AT1G62300,AT1G64660,AT1G68320,AT1G71040,AT1G73730,AT2G03240,AT2G41240,AT2G45170,AT3G06850,AT3G13450,AT3G18290,AT3G26840,AT3G47340,AT3G47640,AT3G55880,AT3G56970,AT3G56980,AT4G00550,AT4G04620,AT4G20260,AT4G27460,AT5G18200,AT5G26880,AT5G28770,AT5G45900,AT5G49450
KEGG	Valine, leucine and isoleucine degradation	KEGG:00280	false	9.97166e-06	5.00123	52	678	22	5083	AT1G03090,AT1G10060,AT1G10070,AT1G21400,AT1G48030,AT1G54100,AT1G55510,AT2G33150,AT2G38400,AT3G06810,AT3G06850,AT3G13450,AT3G16170,AT3G45300,AT3G48000,AT3G60510,AT4G11820,AT4G16800,AT4G20930,AT4G34030,AT4G39660,AT5G65940
KEGG	Fatty acid degradation	KEGG:00071	false	0.0105066	1.97854	47	678	16	5083	AT1G22430,AT1G54100,AT1G77120,AT2G04350,AT2G33150,AT2G35690,AT3G06810,AT3G48000,AT3G51840,AT4G14070,AT4G14430,AT4G16760,AT4G23850,AT5G27600,AT5G42250,AT5G65110
KEGG	Circadian rhythm - plant	KEGG:04712	false	0.0137524	1.86162	39	678	14	5083	AT1G04400,AT1G22770,AT2G23080,AT2G25930,AT2G46790,AT3G17609,AT3G50000,AT5G02810,AT5G24470,AT5G47080,AT5G52250,AT5G60100,AT5G61380,AT5G67380
KEGG	Ribosome biogenesis in eukaryotes	KEGG:03008	false	0.0189328	1.72278	94	678	25	5083	AT1G10490,AT1G15420,AT1G27470,AT1G52980,AT1G67120,AT2G03820,AT2G18900,AT2G23080,AT2G27200,AT2G47990,AT3G06530,AT3G07050,AT3G21540,AT3G50000,AT3G57940,AT4G04940,AT4G07410,AT5G11240,AT5G20160,AT5G22100,AT5G37350,AT5G47080,AT5G66540,AT5G67240,AT5G67380
KEGG	Tropane, piperidine and pyridine alkaloid biosynthesis	KEGG:00960	false	0.0211014	1.67569	36	678	13	5083	AT1G07450,AT1G62810,AT2G22250,AT2G29260,AT2G29320,AT2G29340,AT2G42490,AT4G12290,AT4G28420,AT5G11520,AT5G19550,AT5G36160,AT5G53970
KEGG	Tyrosine metabolism	KEGG:00350	false	0.024855	1.60459	41	678	14	5083	AT1G06570,AT1G22430,AT1G62810,AT1G77120,AT2G02390,AT2G22250,AT2G42490,AT4G12290,AT4G28420,AT5G11520,AT5G19550,AT5G36160,AT5G42250,AT5G53970
KEGG	Other types of O-glycan biosynthesis	KEGG:00514	false	0.0278935	1.5545	13	678	7	5083	AT1G75110,AT1G75120,AT3G01720,AT3G04240,AT3G11540,AT5G13500,AT5G25265
					0.05	1.30103

## Sheet: Tab. S4d
Table S4d: functional enrichment of the differentially expressed genes (DEGs) detected as upregulated under Cd stress responses in A. thaliana root
Bold for top three molecular functions (MFs), biological processes (BPs) or KEGG pathways
source	term_name	term_id	highlighted	adjusted_p_value	negative_log10_of_adjusted_p_value	term_size	query_size	intersection_size	effective_domain_size	intersections
GO:MF	catalytic activity	GO:0003824	true	3.22716e-15	14.4912	9596	2220	1102	23352	AT1G01120,AT1G01190,AT1G01580,AT1G01610,AT1G01660,AT1G01900,AT1G02205,AT1G02310,AT1G02460,AT1G02730,AT1G02810,AT1G02950,AT1G03630,AT1G03920,AT1G04040,AT1G04050,AT1G04180,AT1G04220,AT1G04360,AT1G04610,AT1G04680,AT1G04700,AT1G05170,AT1G05250,AT1G05260,AT1G05310,AT1G05440,AT1G05630,AT1G05850,AT1G06000,AT1G06080,AT1G06420,AT1G06490,AT1G06550,AT1G06830,AT1G07260,AT1G07410,AT1G07560,AT1G07880,AT1G07890…
GO:MF	protein domain specific binding	GO:0019904	true	6.52516e-15	14.1854	68	2220	34	23352	AT1G03130,AT1G06680,AT1G15820,AT1G20340,AT1G29930,AT1G31330,AT1G44575,AT1G51400,AT1G61520,AT2G05100,AT2G06520,AT2G20260,AT2G26500,AT2G34420,AT2G46820,AT2G47450,AT3G02730,AT3G47470,AT3G54890,AT3G56240,AT3G61470,AT4G02770,AT4G10340,AT4G12800,AT4G25100,AT4G27440,AT4G28750,AT4G32260,AT5G01530,AT5G01600,AT5G38410,AT5G54270,AT5G54800,AT5G64040
GO:MF	microtubule binding	GO:0008017	true	7.90166e-12	11.1023	178	2220	53	23352	AT1G09170,AT1G11160,AT1G12430,AT1G18370,AT1G18550,AT1G24764,AT1G27210,AT1G53140,AT1G72250,AT1G73860,AT2G07170,AT2G21300,AT2G22610,AT2G28620,AT2G35880,AT2G36200,AT2G47500,AT3G02170,AT3G04630,AT3G09980,AT3G10310,AT3G19050,AT3G20150,AT3G23090,AT3G23670,AT3G44050,AT3G45850,AT3G60840,AT3G61760,AT4G13370,AT4G14150,AT4G14330,AT4G17220,AT4G18570,AT4G21270,AT4G22860,AT4G24170,AT4G25190,AT4G26760,AT4G27180…
GO:MF	cytoskeletal protein binding	GO:0008092	false	8.12196e-11	10.0903	336	2220	77	23352	AT1G01750,AT1G04160,AT1G09170,AT1G11160,AT1G12430,AT1G18370,AT1G18550,AT1G20450,AT1G24764,AT1G27210,AT1G30050,AT1G53140,AT1G54385,AT1G71790,AT1G72250,AT1G73860,AT1G74830,AT2G07170,AT2G19760,AT2G21300,AT2G22560,AT2G22610,AT2G24140,AT2G28620,AT2G29890,AT2G31900,AT2G33385,AT2G34150,AT2G35880,AT2G36200,AT2G40820,AT2G47500,AT3G02170,AT3G04630,AT3G05470,AT3G09980,AT3G10310,AT3G17680,AT3G19050,AT3G20150…
GO:MF	tubulin binding	GO:0015631	false	9.18184e-11	10.0371	188	2220	53	23352	AT1G09170,AT1G11160,AT1G12430,AT1G18370,AT1G18550,AT1G24764,AT1G27210,AT1G53140,AT1G72250,AT1G73860,AT2G07170,AT2G21300,AT2G22610,AT2G28620,AT2G35880,AT2G36200,AT2G47500,AT3G02170,AT3G04630,AT3G09980,AT3G10310,AT3G19050,AT3G20150,AT3G23090,AT3G23670,AT3G44050,AT3G45850,AT3G60840,AT3G61760,AT4G13370,AT4G14150,AT4G14330,AT4G17220,AT4G18570,AT4G21270,AT4G22860,AT4G24170,AT4G25190,AT4G26760,AT4G27180…
GO:MF	tetrapyrrole binding	GO:0046906	true	1.55051e-10	9.80953	421	2220	89	23352	AT1G01190,AT1G05250,AT1G05260,AT1G07890,AT1G13080,AT1G13110,AT1G15820,AT1G16400,AT1G16410,AT1G29910,AT1G29930,AT1G30870,AT1G44575,AT1G44970,AT1G61520,AT1G68850,AT1G71695,AT1G77490,AT2G05070,AT2G05100,AT2G15620,AT2G18150,AT2G18980,AT2G22330,AT2G25160,AT2G28850,AT2G28860,AT2G32720,AT2G34420,AT2G38380,AT2G38390,AT2G41480,AT2G45970,AT2G46650,AT2G46950,AT3G01190,AT3G01420,AT3G08940,AT3G10520,AT3G21770…
GO:MF	microtubule motor activity	GO:0003777	true	3.14527e-10	9.50234	64	2220	28	23352	AT1G09170,AT1G12430,AT1G18370,AT1G18550,AT1G72250,AT1G73860,AT2G21300,AT2G22610,AT2G28620,AT2G36200,AT2G47500,AT3G10310,AT3G19050,AT3G20150,AT3G23670,AT3G44050,AT3G45850,AT4G14150,AT4G14330,AT4G21270,AT4G24170,AT4G27180,AT4G38950,AT5G27000,AT5G47820,AT5G55520,AT5G60930,AT5G66310
GO:MF	lactoperoxidase activity	GO:0140825	false	7.6489e-09	8.1164	76	2220	29	23352	AT1G05250,AT1G05260,AT1G30870,AT1G44970,AT1G68850,AT1G71695,AT2G18150,AT2G18980,AT2G38380,AT2G38390,AT2G41480,AT3G01190,AT3G17790,AT3G21770,AT3G32980,AT3G49960,AT4G16270,AT4G21960,AT4G26010,AT4G36430,AT5G14130,AT5G17820,AT5G22410,AT5G24070,AT5G42180,AT5G51890,AT5G64100,AT5G66390,AT5G67400
GO:MF	cytoskeletal motor activity	GO:0003774	false	1.70899e-08	7.76726	83	2220	30	23352	AT1G04160,AT1G09170,AT1G12430,AT1G18370,AT1G18550,AT1G72250,AT1G73860,AT2G21300,AT2G22610,AT2G28620,AT2G31900,AT2G36200,AT2G47500,AT3G10310,AT3G19050,AT3G20150,AT3G23670,AT3G44050,AT3G45850,AT4G14150,AT4G14330,AT4G21270,AT4G24170,AT4G27180,AT4G38950,AT5G27000,AT5G47820,AT5G55520,AT5G60930,AT5G66310
GO:MF	oxidoreductase activity	GO:0016491	false	3.35256e-08	7.47462	1606	2220	230	23352	AT1G01190,AT1G01580,AT1G02205,AT1G03630,AT1G04180,AT1G04610,AT1G05250,AT1G05260,AT1G06080,AT1G06830,AT1G07890,AT1G09090,AT1G12900,AT1G13080,AT1G13110,AT1G14120,AT1G14185,AT1G14730,AT1G15550,AT1G16300,AT1G16400,AT1G16410,AT1G18140,AT1G18180,AT1G19230,AT1G20340,AT1G22440,AT1G26570,AT1G30510,AT1G30870,AT1G31230,AT1G32100,AT1G42970,AT1G44970,AT1G52340,AT1G55290,AT1G58290,AT1G60950,AT1G62190,AT1G62560…
GO:MF	transmembrane transporter activity	GO:0022857	true	5.82938e-08	7.23438	1256	2220	188	23352	AT1G01620,AT1G08430,AT1G10800,AT1G11670,AT1G12110,AT1G12500,AT1G12950,AT1G14730,AT1G15210,AT1G15460,AT1G16390,AT1G18880,AT1G20860,AT1G21070,AT1G21140,AT1G22710,AT1G25480,AT1G25530,AT1G30560,AT1G30840,AT1G31770,AT1G32080,AT1G32450,AT1G33440,AT1G44800,AT1G48640,AT1G49960,AT1G50740,AT1G53270,AT1G58520,AT1G60050,AT1G60960,AT1G62280,AT1G62320,AT1G64200,AT1G64650,AT1G64780,AT1G67940,AT1G68570,AT1G68650…
GO:MF	peroxidase activity	GO:0004601	false	9.53728e-08	7.02058	137	2220	39	23352	AT1G05250,AT1G05260,AT1G07890,AT1G09090,AT1G19230,AT1G30870,AT1G44970,AT1G68850,AT1G71695,AT1G77490,AT2G18150,AT2G18980,AT2G30860,AT2G38380,AT2G38390,AT2G41480,AT2G48150,AT3G01190,AT3G01420,AT3G17790,AT3G21770,AT3G32980,AT3G49960,AT4G16270,AT4G21960,AT4G25090,AT4G26010,AT4G36430,AT5G07390,AT5G14130,AT5G17820,AT5G22410,AT5G24070,AT5G42180,AT5G51060,AT5G51890,AT5G64100,AT5G66390,AT5G67400
GO:MF	oxidoreductase activity, acting on peroxide as acceptor	GO:0016684	false	3.79049e-07	6.42131	143	2220	39	23352	AT1G05250,AT1G05260,AT1G07890,AT1G09090,AT1G19230,AT1G30870,AT1G44970,AT1G68850,AT1G71695,AT1G77490,AT2G18150,AT2G18980,AT2G30860,AT2G38380,AT2G38390,AT2G41480,AT2G48150,AT3G01190,AT3G01420,AT3G17790,AT3G21770,AT3G32980,AT3G49960,AT4G16270,AT4G21960,AT4G25090,AT4G26010,AT4G36430,AT5G07390,AT5G14130,AT5G17820,AT5G22410,AT5G24070,AT5G42180,AT5G51060,AT5G51890,AT5G64100,AT5G66390,AT5G67400
GO:MF	transporter activity	GO:0005215	false	5.049e-07	6.29679	1298	2220	189	23352	AT1G01620,AT1G08430,AT1G10800,AT1G11670,AT1G12110,AT1G12500,AT1G12950,AT1G14730,AT1G15210,AT1G15460,AT1G16390,AT1G18880,AT1G20860,AT1G21070,AT1G21140,AT1G22710,AT1G25480,AT1G25530,AT1G30560,AT1G30840,AT1G31770,AT1G32080,AT1G32450,AT1G33440,AT1G44800,AT1G48640,AT1G49960,AT1G50740,AT1G53270,AT1G58520,AT1G60050,AT1G60960,AT1G62280,AT1G62320,AT1G64200,AT1G64650,AT1G64780,AT1G67940,AT1G68570,AT1G68650…
GO:MF	chlorophyll binding	GO:0016168	false	7.91881e-07	6.10134	34	2220	17	23352	AT1G15820,AT1G29910,AT1G29930,AT1G44575,AT1G61520,AT2G05070,AT2G05100,AT2G34420,AT3G08940,AT3G27690,AT3G47470,AT3G54890,AT3G61470,AT4G10340,AT5G01530,AT5G02120,AT5G54270
GO:MF	structural constituent of chromatin	GO:0030527	true	1.07689e-06	5.96783	56	2220	22	23352	AT1G06760,AT1G07790,AT1G07820,AT1G09200,AT1G51060,AT2G28740,AT2G37470,AT3G20670,AT3G46030,AT3G46320,AT3G53730,AT3G54560,AT4G27230,AT5G10390,AT5G10400,AT5G22880,AT5G54640,AT5G59690,AT5G59870,AT5G59910,AT5G59970,AT5G65360
GO:MF	antioxidant activity	GO:0016209	false	1.957e-06	5.70841	163	2220	41	23352	AT1G05250,AT1G05260,AT1G07890,AT1G09090,AT1G19230,AT1G30870,AT1G44970,AT1G68850,AT1G71695,AT1G77490,AT2G18150,AT2G18980,AT2G30860,AT2G38380,AT2G38390,AT2G41480,AT2G48150,AT3G01190,AT3G01420,AT3G17790,AT3G21770,AT3G32980,AT3G49960,AT4G16270,AT4G21960,AT4G25090,AT4G25100,AT4G26010,AT4G36430,AT5G07390,AT5G14130,AT5G16710,AT5G17820,AT5G22410,AT5G24070,AT5G42180,AT5G51060,AT5G51890,AT5G64100,AT5G66390…
GO:MF	water transmembrane transporter activity	GO:0005372	false	2.08382e-06	5.68114	28	2220	15	23352	AT1G01620,AT2G16850,AT2G25810,AT2G36830,AT2G37170,AT2G37180,AT2G39010,AT2G45960,AT3G53420,AT3G54820,AT3G61430,AT4G00430,AT4G17340,AT4G19030,AT4G35100
GO:MF	water channel activity	GO:0015250	false	2.08382e-06	5.68114	28	2220	15	23352	AT1G01620,AT2G16850,AT2G25810,AT2G36830,AT2G37170,AT2G37180,AT2G39010,AT2G45960,AT3G53420,AT3G54820,AT3G61430,AT4G00430,AT4G17340,AT4G19030,AT4G35100
GO:MF	lyase activity	GO:0016829	false	3.73176e-06	5.42809	461	2220	83	23352	AT1G02205,AT1G02460,AT1G04680,AT1G08250,AT1G08470,AT1G10640,AT1G10670,AT1G11920,AT1G14220,AT1G23460,AT1G26820,AT1G31950,AT1G33750,AT1G48800,AT1G48820,AT1G53310,AT1G60550,AT1G66020,AT1G67090,AT1G67750,AT1G70410,AT1G70500,AT1G70560,AT1G73080,AT1G78570,AT1G78970,AT1G80170,AT2G19150,AT2G20610,AT2G21330,AT2G22620,AT2G27820,AT2G37040,AT2G38700,AT2G41290,AT2G41300,AT2G43100,AT2G43870,AT2G43880,AT2G47650…
GO:MF	UDP-glycosyltransferase activity	GO:0008194	true	4.76843e-06	5.32162	302	2220	61	23352	AT1G02730,AT1G05170,AT1G06000,AT1G06490,AT1G07260,AT1G09350,AT1G11730,AT1G13250,AT1G19300,AT1G24100,AT1G30530,AT1G32900,AT1G53290,AT1G54940,AT1G64910,AT1G64920,AT1G78580,AT2G11810,AT2G16890,AT2G18560,AT2G18570,AT2G22590,AT2G22930,AT2G28080,AT2G29750,AT2G31790,AT2G33570,AT2G37090,AT3G02230,AT3G11420,AT3G11670,AT3G14570,AT3G15350,AT3G16520,AT3G18660,AT3G21560,AT3G21750,AT3G29630,AT3G62660,AT4G01070…
GO:MF	hexosyltransferase activity	GO:0016758	false	9.13117e-06	5.03947	365	2220	69	23352	AT1G02730,AT1G05170,AT1G06000,AT1G06490,AT1G07260,AT1G09350,AT1G11545,AT1G11730,AT1G13250,AT1G19300,AT1G24100,AT1G27120,AT1G30530,AT1G32900,AT1G53290,AT1G54940,AT1G55740,AT1G78580,AT2G11810,AT2G18800,AT2G29750,AT2G31790,AT2G33570,AT2G35650,AT2G36870,AT2G37090,AT3G02230,AT3G11420,AT3G11670,AT3G14570,AT3G15350,AT3G16520,AT3G18660,AT3G21190,AT3G21560,AT3G21750,AT3G44990,AT3G62660,AT4G01070,AT4G01970…
GO:MF	glycosyltransferase activity	GO:0016757	false	1.17751e-05	4.92903	629	2220	103	23352	AT1G02730,AT1G05170,AT1G06000,AT1G06490,AT1G07260,AT1G08990,AT1G09350,AT1G11545,AT1G11730,AT1G13250,AT1G19300,AT1G24100,AT1G27120,AT1G30530,AT1G32900,AT1G53290,AT1G54940,AT1G55740,AT1G62330,AT1G63450,AT1G64910,AT1G64920,AT1G68470,AT1G78580,AT1G80050,AT2G11810,AT2G16890,AT2G18560,AT2G18570,AT2G18800,AT2G22590,AT2G22930,AT2G25260,AT2G28080,AT2G29750,AT2G31790,AT2G33570,AT2G35650,AT2G36870,AT2G37090…
GO:MF	heme binding	GO:0020037	false	1.62583e-05	4.78893	385	2220	71	23352	AT1G01190,AT1G05250,AT1G05260,AT1G07890,AT1G13080,AT1G13110,AT1G16400,AT1G16410,AT1G30870,AT1G44970,AT1G68850,AT1G71695,AT1G77490,AT2G15620,AT2G18150,AT2G18980,AT2G22330,AT2G25160,AT2G28850,AT2G28860,AT2G32720,AT2G38380,AT2G38390,AT2G41480,AT2G45970,AT2G46650,AT2G46950,AT3G01190,AT3G01420,AT3G10520,AT3G21770,AT3G27240,AT3G32047,AT3G32980,AT3G48280,AT3G48520,AT3G49960,AT3G50660,AT4G00360,AT4G12330…
GO:MF	hydroquinone:oxygen oxidoreductase activity	GO:0052716	false	1.66437e-05	4.77875	17	2220	11	23352	AT1G18140,AT2G30210,AT2G38080,AT2G40370,AT3G09220,AT5G01190,AT5G03260,AT5G05390,AT5G07130,AT5G58910,AT5G60020
GO:MF	carbon-oxygen lyase activity	GO:0016835	false	0.00010117	3.99495	166	2220	38	23352	AT1G04680,AT1G08250,AT1G11920,AT1G31950,AT1G33750,AT1G48800,AT1G48820,AT1G66020,AT1G67750,AT1G70410,AT1G78570,AT1G78970,AT2G22620,AT2G27820,AT2G43100,AT3G01500,AT3G07010,AT3G09540,AT3G14540,AT3G24670,AT3G27400,AT3G29410,AT3G32030,AT3G52720,AT3G53190,AT3G58990,AT3G62830,AT4G13430,AT4G13710,AT4G14440,AT4G20230,AT4G22080,AT4G24780,AT5G10480,AT5G14740,AT5G22630,AT5G42650,AT5G50950
GO:MF	inorganic molecular entity transmembrane transporter activity	GO:0015318	false	0.000586297	3.23188	469	2220	77	23352	AT1G01620,AT1G10800,AT1G12110,AT1G15460,AT1G18880,AT1G21140,AT1G22710,AT1G30560,AT1G32450,AT1G60960,AT1G64200,AT1G64650,AT1G64780,AT1G67940,AT1G68650,AT1G72140,AT1G76430,AT1G76800,AT1G80050,AT1G80760,AT2G03590,AT2G16850,AT2G24610,AT2G25810,AT2G29410,AT2G32270,AT2G36830,AT2G37170,AT2G37180,AT2G38060,AT2G38940,AT2G39010,AT2G45960,AT2G47160,AT3G23430,AT3G24300,AT3G25190,AT3G45680,AT3G46900,AT3G47960…
GO:MF	ion binding	GO:0043167	true	0.000743787	3.12855	6574	2220	720	23352	AT1G01190,AT1G01580,AT1G02205,AT1G02335,AT1G02950,AT1G03840,AT1G03920,AT1G04020,AT1G04050,AT1G04160,AT1G04180,AT1G04360,AT1G04610,AT1G04680,AT1G04700,AT1G04820,AT1G05250,AT1G05260,AT1G05630,AT1G05990,AT1G06080,AT1G06680,AT1G06830,AT1G07410,AT1G07560,AT1G07750,AT1G07880,AT1G07890,AT1G08590,AT1G08650,AT1G08990,AT1G09090,AT1G09170,AT1G09350,AT1G09440,AT1G09450,AT1G09560,AT1G10460,AT1G10480,AT1G10630…
GO:MF	structural constituent of cell wall	GO:0005199	true	0.002424	2.61547	29	2220	12	23352	AT1G12040,AT1G23720,AT2G24980,AT3G28550,AT3G54580,AT3G54590,AT4G08400,AT4G08410,AT4G13390,AT5G06630,AT5G06640,AT5G35190
GO:MF	pectate lyase activity	GO:0030570	false	0.00461744	2.3356	26	2220	11	23352	AT1G04680,AT1G11920,AT1G67750,AT3G07010,AT3G09540,AT3G24670,AT3G27400,AT3G53190,AT4G13710,AT4G22080,AT4G24780
GO:MF	oxidoreductase activity, acting on metal ions	GO:0016722	false	0.00461744	2.3356	26	2220	11	23352	AT1G01580,AT1G09090,AT1G14730,AT1G19230,AT2G40300,AT3G56090,AT4G25090,AT5G01600,AT5G07390,AT5G23980,AT5G51060
GO:MF	DNA-binding transcription factor activity	GO:0003700	true	0.00463614	2.33384	1660	2220	209	23352	AT1G01060,AT1G01380,AT1G02340,AT1G03840,AT1G04250,AT1G04550,AT1G08320,AT1G09250,AT1G09540,AT1G10120,AT1G10480,AT1G13600,AT1G16060,AT1G19000,AT1G19350,AT1G19850,AT1G20640,AT1G22640,AT1G25440,AT1G27740,AT1G29280,AT1G30650,AT1G46480,AT1G47655,AT1G51140,AT1G55580,AT1G57560,AT1G62990,AT1G63650,AT1G64000,AT1G64625,AT1G64860,AT1G65330,AT1G66350,AT1G66470,AT1G67710,AT1G68360,AT1G68520,AT1G68810,AT1G68840…
GO:MF	copper ion binding	GO:0005507	true	0.00542282	2.26577	194	2220	38	23352	AT1G07750,AT1G10630,AT1G18140,AT1G20340,AT1G20450,AT1G30510,AT1G66200,AT1G67090,AT1G76100,AT1G79530,AT2G23630,AT2G30210,AT2G30860,AT2G36880,AT2G38080,AT2G40370,AT3G08580,AT3G09220,AT3G09820,AT3G15020,AT3G29250,AT3G43670,AT3G52930,AT4G01850,AT4G25100,AT4G25240,AT4G37160,AT5G01190,AT5G03260,AT5G03300,AT5G04590,AT5G05390,AT5G07130,AT5G17920,AT5G49555,AT5G50370,AT5G58910,AT5G60020
GO:MF	ferric iron binding	GO:0008199	true	0.00671571	2.17291	11	2220	7	23352	AT1G14700,AT1G25230,AT2G01890,AT2G40300,AT3G17790,AT3G56090,AT5G01600
GO:MF	auxin transmembrane transporter activity	GO:0080161	false	0.00982613	2.00762	19	2220	9	23352	AT1G70940,AT1G73590,AT1G77110,AT1G77690,AT2G01420,AT2G38120,AT3G28860,AT3G53480,AT5G01240
GO:MF	carbon-oxygen lyase activity, acting on polysaccharides	GO:0016837	false	0.0115477	1.9375	33	2220	12	23352	AT1G04680,AT1G11920,AT1G67750,AT2G22620,AT3G07010,AT3G09540,AT3G24670,AT3G27400,AT3G53190,AT4G13710,AT4G22080,AT4G24780
GO:MF	intramolecular lyase activity	GO:0016872	true	0.0147885	1.83008	12	2220	7	23352	AT1G53520,AT2G22240,AT3G55120,AT3G63170,AT5G05270,AT5G10170,AT5G66230
GO:MF	glucosyltransferase activity	GO:0046527	false	0.015469	1.81054	181	2220	35	23352	AT1G02730,AT1G06490,AT1G07260,AT1G11545,AT1G24100,AT1G30530,AT1G32900,AT1G78580,AT2G18800,AT2G29750,AT2G31790,AT2G36870,AT3G02230,AT3G14570,AT3G16520,AT3G21560,AT3G21750,AT3G44990,AT4G01070,AT4G03210,AT4G10120,AT4G18780,AT4G26850,AT4G37800,AT5G09870,AT5G11110,AT5G13870,AT5G17050,AT5G17420,AT5G37180,AT5G38010,AT5G44030,AT5G57530,AT5G57540,AT5G66690
GO:MF	plus-end-directed microtubule motor activity	GO:0008574	false	0.0174025	1.75939	16	2220	8	23352	AT1G12430,AT1G18550,AT2G28620,AT2G36200,AT3G20150,AT3G23670,AT4G14150,AT5G47820
GO:MF	oxidoreductase activity, acting on diphenols and related substances as donors	GO:0016679	false	0.0226781	1.64439	35	2220	12	23352	AT1G18140,AT2G30210,AT2G38080,AT2G40370,AT3G09220,AT4G03280,AT5G01190,AT5G03260,AT5G05390,AT5G07130,AT5G58910,AT5G60020
GO:MF	oxidoreductase activity, acting on diphenols and related substances as donors, oxygen as acceptor	GO:0016682	false	0.0228081	1.64191	30	2220	11	23352	AT1G18140,AT2G30210,AT2G38080,AT2G40370,AT3G09220,AT5G01190,AT5G03260,AT5G05390,AT5G07130,AT5G58910,AT5G60020
GO:MF	zinc ion transmembrane transporter activity	GO:0005385	true	0.0310621	1.50777	26	2220	10	23352	AT1G60960,AT2G29410,AT2G32270,AT3G58810,AT4G19680,AT4G19690,AT4G30110,AT4G30120,AT4G33020,AT5G59520
GO:MF	fatty acid elongase activity	GO:0009922	true	0.0454005	1.34294	10	2220	6	23352	AT1G01120,AT1G04220,AT1G25450,AT3G06460,AT3G55360,AT5G43760
GO:MF	hydrolase activity, hydrolyzing O-glycosyl compounds	GO:0004553	true	0.0459701	1.33752	404	2220	62	23352	AT1G02310,AT1G02460,AT1G05850,AT1G10640,AT1G11545,AT1G19940,AT1G22650,AT1G23460,AT1G26560,AT1G33700,AT1G45130,AT1G48100,AT1G48930,AT1G52400,AT1G56680,AT1G60270,AT1G62660,AT1G64390,AT1G66270,AT1G70500,AT1G70710,AT1G75680,AT1G80170,AT2G18800,AT2G28470,AT2G36870,AT2G43610,AT2G43870,AT2G43880,AT3G06770,AT3G07320,AT3G07970,AT3G15800,AT3G16850,AT3G16920,AT3G26610,AT3G44990,AT3G47010,AT3G47050,AT3G54420…
GO:MF	carboxylic acid transmembrane transporter activity	GO:0046943	false	0.0464398	1.33311	105	2220	23	23352	AT1G08430,AT1G25530,AT1G32080,AT1G44800,AT1G48640,AT1G50740,AT1G77690,AT2G21050,AT2G34390,AT2G38120,AT2G39510,AT2G40900,AT2G41190,AT3G01760,AT4G12030,AT4G25010,AT5G01240,AT5G01340,AT5G09220,AT5G38820,AT5G49630,AT5G50800,AT5G63850
GO:MF	organic acid transmembrane transporter activity	GO:0005342	false	0.0464398	1.33311	105	2220	23	23352	AT1G08430,AT1G25530,AT1G32080,AT1G44800,AT1G48640,AT1G50740,AT1G77690,AT2G21050,AT2G34390,AT2G38120,AT2G39510,AT2G40900,AT2G41190,AT3G01760,AT4G12030,AT4G25010,AT5G01240,AT5G01340,AT5G09220,AT5G38820,AT5G49630,AT5G50800,AT5G63850
GO:BP	cell wall organization or biogenesis	GO:0071554	true	1.70734e-38	37.7677	700	2100	184	23046	AT1G02730,AT1G02810,AT1G03870,AT1G05250,AT1G05310,AT1G05850,AT1G06490,AT1G07410,AT1G08990,AT1G11545,AT1G12040,AT1G12560,AT1G13250,AT1G19300,AT1G19940,AT1G20190,AT1G23200,AT1G23720,AT1G24100,AT1G27120,AT1G33800,AT1G43790,AT1G48100,AT1G48930,AT1G53830,AT1G53840,AT1G54940,AT1G56680,AT1G57590,AT1G62980,AT1G62990,AT1G63000,AT1G63450,AT1G64390,AT1G64440,AT1G64670,AT1G67330,AT1G70370,AT1G70710,AT1G71930…
GO:BP	cell wall organization	GO:0071555	false	2.87163e-32	31.5419	532	2100	146	23046	AT1G02730,AT1G02810,AT1G05250,AT1G05310,AT1G06490,AT1G08990,AT1G11545,AT1G12040,AT1G12560,AT1G13250,AT1G19300,AT1G19940,AT1G20190,AT1G23200,AT1G23720,AT1G24100,AT1G43790,AT1G48100,AT1G48930,AT1G53830,AT1G53840,AT1G54940,AT1G57590,AT1G62980,AT1G63000,AT1G64390,AT1G64440,AT1G64670,AT1G67330,AT1G70370,AT1G70710,AT1G71930,AT1G73360,AT1G73410,AT1G75500,AT1G75680,AT1G78570,AT1G80170,AT2G03090,AT2G18230…
GO:BP	external encapsulating structure organization	GO:0045229	false	2.88678e-31	30.5396	579	2100	152	23046	AT1G02730,AT1G02810,AT1G05250,AT1G05310,AT1G06490,AT1G08990,AT1G11545,AT1G12040,AT1G12560,AT1G13250,AT1G19300,AT1G19940,AT1G20190,AT1G23200,AT1G23720,AT1G24100,AT1G43790,AT1G48100,AT1G48930,AT1G53830,AT1G53840,AT1G54940,AT1G57590,AT1G59970,AT1G62980,AT1G63000,AT1G64390,AT1G64440,AT1G64670,AT1G65060,AT1G67330,AT1G70370,AT1G70710,AT1G71930,AT1G73360,AT1G73410,AT1G75500,AT1G75680,AT1G78570,AT1G80170…
GO:BP	root development	GO:0048364	true	2.22374e-23	22.6529	615	2100	143	23046	AT1G01380,AT1G02335,AT1G02900,AT1G03840,AT1G04160,AT1G04550,AT1G05630,AT1G05850,AT1G07880,AT1G09540,AT1G09560,AT1G10480,AT1G11130,AT1G12040,AT1G12110,AT1G12430,AT1G12560,AT1G12820,AT1G12950,AT1G15570,AT1G16300,AT1G16440,AT1G19850,AT1G24620,AT1G27740,AT1G31880,AT1G32080,AT1G44900,AT1G49430,AT1G63450,AT1G64440,AT1G64625,AT1G64670,AT1G66470,AT1G67710,AT1G69970,AT1G70560,AT1G70940,AT1G73590,AT1G74500…
GO:BP	root system development	GO:0022622	false	2.64596e-23	22.5774	616	2100	143	23046	AT1G01380,AT1G02335,AT1G02900,AT1G03840,AT1G04160,AT1G04550,AT1G05630,AT1G05850,AT1G07880,AT1G09540,AT1G09560,AT1G10480,AT1G11130,AT1G12040,AT1G12110,AT1G12430,AT1G12560,AT1G12820,AT1G12950,AT1G15570,AT1G16300,AT1G16440,AT1G19850,AT1G24620,AT1G27740,AT1G31880,AT1G32080,AT1G44900,AT1G49430,AT1G63450,AT1G64440,AT1G64625,AT1G64670,AT1G66470,AT1G67710,AT1G69970,AT1G70560,AT1G70940,AT1G73590,AT1G74500…
GO:BP	plant-type cell wall organization or biogenesis	GO:0071669	false	1.79966e-22	21.7448	297	2100	90	23046	AT1G02730,AT1G03870,AT1G05250,AT1G12560,AT1G20190,AT1G23720,AT1G33800,AT1G43790,AT1G48100,AT1G62980,AT1G62990,AT1G64440,AT1G67330,AT1G70370,AT1G73360,AT1G73410,AT1G75500,AT1G78580,AT1G79620,AT2G03090,AT2G04780,AT2G15440,AT2G18230,AT2G21140,AT2G24980,AT2G26330,AT2G28315,AT2G28950,AT2G36570,AT2G37090,AT2G37640,AT2G38080,AT2G39700,AT2G40320,AT2G40610,AT2G45890,AT2G46710,AT3G02230,AT3G07970,AT3G11490…
GO:BP	phenylpropanoid metabolic process	GO:0009698	true	5.31362e-22	21.2746	170	2100	65	23046	AT1G04220,AT1G05250,AT1G07890,AT1G18140,AT1G22640,AT1G28680,AT1G32100,AT1G33800,AT1G55210,AT1G58170,AT1G61590,AT1G64670,AT1G65060,AT1G66270,AT2G21100,AT2G30210,AT2G36880,AT2G37040,AT2G38080,AT2G39430,AT2G40370,AT3G09220,AT3G10340,AT3G11430,AT3G11670,AT3G12900,AT3G13610,AT3G13650,AT3G16340,AT3G19450,AT3G19820,AT3G21240,AT3G21560,AT3G24020,AT3G44540,AT3G44550,AT3G53480,AT3G53510,AT3G55230,AT3G55580…
GO:BP	response to chemical	GO:0042221	false	8.87259e-22	21.0519	3105	2100	445	23046	AT1G01620,AT1G02205,AT1G02340,AT1G02730,AT1G02950,AT1G03840,AT1G04180,AT1G04250,AT1G04550,AT1G04610,AT1G05250,AT1G05260,AT1G05630,AT1G05850,AT1G07820,AT1G07890,AT1G08320,AT1G08430,AT1G08650,AT1G09090,AT1G09310,AT1G09340,AT1G10360,AT1G10480,AT1G10560,AT1G11350,AT1G11670,AT1G12000,AT1G12110,AT1G12420,AT1G12820,AT1G12950,AT1G13420,AT1G15100,AT1G15460,AT1G15550,AT1G16060,AT1G17190,AT1G17750,AT1G18100…
GO:BP	secondary metabolic process	GO:0019748	false	3.46575e-20	19.4602	396	2100	103	23046	AT1G02950,AT1G04220,AT1G05250,AT1G07890,AT1G10360,AT1G16400,AT1G16410,AT1G17190,AT1G18140,AT1G18590,AT1G22640,AT1G24100,AT1G27130,AT1G27140,AT1G28680,AT1G32100,AT1G33800,AT1G49860,AT1G52340,AT1G52400,AT1G53680,AT1G55210,AT1G58170,AT1G61590,AT1G62560,AT1G64670,AT1G65060,AT1G66270,AT1G68360,AT1G74090,AT1G78370,AT2G20610,AT2G21100,AT2G22330,AT2G23000,AT2G29440,AT2G30210,AT2G30860,AT2G36880,AT2G37040…
GO:BP	secondary metabolite biosynthetic process	GO:0044550	false	1.20419e-19	18.9193	190	2100	66	23046	AT1G04220,AT1G07890,AT1G16400,AT1G16410,AT1G18590,AT1G22640,AT1G24100,AT1G28680,AT1G32100,AT1G55210,AT1G58170,AT1G61590,AT1G62560,AT1G64670,AT1G74090,AT2G20610,AT2G21100,AT2G22330,AT2G36880,AT2G37040,AT2G38080,AT2G39430,AT2G43100,AT3G10340,AT3G11430,AT3G11670,AT3G12900,AT3G13610,AT3G13650,AT3G16340,AT3G19450,AT3G19710,AT3G24020,AT3G44540,AT3G44550,AT3G53510,AT3G55230,AT3G55580,AT3G58990,AT4G01070…
GO:BP	root morphogenesis	GO:0010015	false	3.95812e-19	18.4025	328	2100	90	23046	AT1G01380,AT1G04160,AT1G05850,AT1G07880,AT1G10480,AT1G11130,AT1G12040,AT1G12560,AT1G12950,AT1G15570,AT1G16440,AT1G24620,AT1G27740,AT1G31880,AT1G44900,AT1G49430,AT1G63450,AT1G64440,AT1G66470,AT1G67710,AT1G69970,AT1G70560,AT1G70940,AT1G74500,AT1G77110,AT1G77690,AT2G01420,AT2G01830,AT2G03720,AT2G12646,AT2G22670,AT2G26420,AT2G28150,AT2G30340,AT2G38120,AT2G41970,AT2G45420,AT2G45890,AT3G04630,AT3G06300…
GO:BP	response to stimulus	GO:0050896	false	4.2089e-18	17.3758	6427	2100	774	23046	AT1G01060,AT1G01120,AT1G01580,AT1G01620,AT1G02205,AT1G02340,AT1G02730,AT1G02900,AT1G02950,AT1G03840,AT1G03920,AT1G04020,AT1G04180,AT1G04220,AT1G04250,AT1G04550,AT1G04610,AT1G04700,AT1G05250,AT1G05260,AT1G05630,AT1G05850,AT1G06830,AT1G07260,AT1G07370,AT1G07500,AT1G07820,AT1G07880,AT1G07890,AT1G08320,AT1G08340,AT1G08430,AT1G08650,AT1G09090,AT1G09310,AT1G09340,AT1G09350,AT1G09450,AT1G09750,AT1G10120…
GO:BP	developmental process	GO:0032502	false	4.96931e-17	16.3037	3323	2100	450	23046	AT1G01060,AT1G01380,AT1G01610,AT1G02335,AT1G02730,AT1G02900,AT1G03840,AT1G04160,AT1G04250,AT1G04550,AT1G05630,AT1G05850,AT1G06490,AT1G07750,AT1G07880,AT1G07890,AT1G08320,AT1G08590,AT1G09090,AT1G09540,AT1G09560,AT1G10480,AT1G10560,AT1G10670,AT1G11130,AT1G11160,AT1G12040,AT1G12110,AT1G12430,AT1G12560,AT1G12820,AT1G12950,AT1G14280,AT1G15570,AT1G16060,AT1G16300,AT1G16440,AT1G18100,AT1G18370,AT1G18620…
GO:BP	plant organ development	GO:0099402	false	1.73263e-16	15.7613	1165	2100	201	23046	AT1G01380,AT1G02335,AT1G02900,AT1G03840,AT1G04160,AT1G04250,AT1G04550,AT1G05630,AT1G05850,AT1G07880,AT1G08320,AT1G09540,AT1G09560,AT1G10480,AT1G10670,AT1G11130,AT1G12040,AT1G12110,AT1G12430,AT1G12560,AT1G12820,AT1G12950,AT1G14280,AT1G15570,AT1G16300,AT1G16440,AT1G19300,AT1G19850,AT1G24620,AT1G27740,AT1G31770,AT1G31880,AT1G32080,AT1G32450,AT1G44900,AT1G44970,AT1G49430,AT1G53310,AT1G63450,AT1G64440…
GO:BP	anatomical structure development	GO:0048856	false	1.96138e-16	15.7074	3161	2100	430	23046	AT1G01060,AT1G01380,AT1G01610,AT1G02335,AT1G02730,AT1G02900,AT1G03840,AT1G04160,AT1G04250,AT1G04550,AT1G05630,AT1G05850,AT1G06490,AT1G07750,AT1G07880,AT1G07890,AT1G08320,AT1G08590,AT1G09090,AT1G09540,AT1G09560,AT1G10480,AT1G10560,AT1G10670,AT1G11130,AT1G11160,AT1G12040,AT1G12110,AT1G12430,AT1G12560,AT1G12820,AT1G12950,AT1G14280,AT1G15570,AT1G16060,AT1G16300,AT1G16440,AT1G18100,AT1G18370,AT1G18620…
GO:BP	phenylpropanoid biosynthetic process	GO:0009699	false	2.77082e-15	14.5574	124	2100	47	23046	AT1G04220,AT1G07890,AT1G22640,AT1G28680,AT1G32100,AT1G55210,AT1G58170,AT1G61590,AT1G64670,AT2G21100,AT2G36880,AT2G37040,AT2G38080,AT2G39430,AT3G10340,AT3G11430,AT3G11670,AT3G12900,AT3G13610,AT3G13650,AT3G16340,AT3G19450,AT3G24020,AT3G44540,AT3G44550,AT3G53510,AT3G55230,AT3G55580,AT4G01070,AT4G11210,AT4G23690,AT4G26220,AT4G31940,AT4G37970,AT4G39330,AT5G03260,AT5G04330,AT5G10280,AT5G13580,AT5G23190…
GO:BP	carbohydrate metabolic process	GO:0005975	false	4.66989e-15	14.3307	1183	2100	199	23046	AT1G02460,AT1G02730,AT1G02810,AT1G04680,AT1G05310,AT1G05630,AT1G05850,AT1G06490,AT1G08990,AT1G09340,AT1G09350,AT1G10640,AT1G10670,AT1G11545,AT1G11920,AT1G12000,AT1G12900,AT1G13250,AT1G16300,AT1G16860,AT1G19300,AT1G19940,AT1G21270,AT1G22170,AT1G22650,AT1G22710,AT1G23200,AT1G23460,AT1G26560,AT1G32900,AT1G33700,AT1G33800,AT1G42970,AT1G45130,AT1G47840,AT1G48100,AT1G48930,AT1G52400,AT1G53830,AT1G53840…
GO:BP	photosynthesis	GO:0015979	true	6.47531e-15	14.1887	281	2100	75	23046	AT1G03130,AT1G03630,AT1G06680,AT1G08380,AT1G12000,AT1G12900,AT1G15820,AT1G29910,AT1G29930,AT1G30380,AT1G30510,AT1G30850,AT1G31330,AT1G42970,AT1G44575,AT1G52230,AT1G53310,AT1G55670,AT1G60950,AT1G61520,AT1G64860,AT1G67090,AT1G67740,AT1G74470,AT1G79040,AT2G01590,AT2G05070,AT2G05100,AT2G06520,AT2G18790,AT2G20260,AT2G30570,AT2G34420,AT2G40300,AT2G46820,AT3G01500,AT3G08940,AT3G11670,AT3G14940,AT3G16140…
GO:BP	cellular process	GO:0009987	false	7.92023e-15	14.1013	16016	2100	1627	23046	AT1G01060,AT1G01120,AT1G01380,AT1G01580,AT1G01610,AT1G01620,AT1G01750,AT1G02205,AT1G02335,AT1G02340,AT1G02730,AT1G02810,AT1G02900,AT1G02950,AT1G03130,AT1G03630,AT1G03840,AT1G03870,AT1G03920,AT1G04020,AT1G04030,AT1G04050,AT1G04160,AT1G04180,AT1G04220,AT1G04250,AT1G04520,AT1G04550,AT1G04610,AT1G04700,AT1G04760,AT1G04820,AT1G05170,AT1G05250,AT1G05260,AT1G05310,AT1G05630,AT1G05640,AT1G05850,AT1G06080…
GO:BP	plant-type cell wall organization	GO:0009664	false	1.5767e-14	13.8023	154	2100	52	23046	AT1G05250,AT1G12560,AT1G20190,AT1G23720,AT1G48100,AT1G62980,AT1G67330,AT1G70370,AT1G73360,AT2G03090,AT2G18230,AT2G21140,AT2G24980,AT2G26330,AT2G28950,AT2G37640,AT2G39700,AT2G40610,AT2G45890,AT2G46710,AT3G07970,AT3G11490,AT3G21190,AT3G26610,AT3G28550,AT3G29030,AT3G54580,AT3G54590,AT4G08400,AT4G08410,AT4G13390,AT4G34980,AT4G39010,AT5G01360,AT5G02260,AT5G04960,AT5G06610,AT5G06630,AT5G06640,AT5G14650…
GO:BP	cell wall biogenesis	GO:0042546	false	3.13342e-14	13.504	270	2100	72	23046	AT1G02730,AT1G03870,AT1G07410,AT1G08990,AT1G11545,AT1G19300,AT1G33800,AT1G43790,AT1G54940,AT1G62990,AT1G63450,AT1G64440,AT1G67330,AT1G73410,AT1G75500,AT1G78580,AT1G79620,AT2G04780,AT2G15440,AT2G18800,AT2G28315,AT2G33570,AT2G36570,AT2G36870,AT2G37090,AT2G38080,AT2G38320,AT2G39770,AT2G40320,AT3G02230,AT3G18660,AT3G19820,AT3G21190,AT3G44990,AT3G50220,AT3G59690,AT4G02270,AT4G02500,AT4G03210,AT4G09990…
GO:BP	plant organ morphogenesis	GO:1905392	false	1.89838e-13	12.7216	470	2100	101	23046	AT1G01380,AT1G04160,AT1G05850,AT1G07880,AT1G10480,AT1G11130,AT1G12040,AT1G12560,AT1G12950,AT1G15570,AT1G16440,AT1G24620,AT1G27740,AT1G31770,AT1G31880,AT1G44900,AT1G49430,AT1G63450,AT1G64440,AT1G66470,AT1G67710,AT1G69970,AT1G70560,AT1G70940,AT1G73590,AT1G74500,AT1G77110,AT1G77690,AT2G01420,AT2G01830,AT2G03720,AT2G12646,AT2G19730,AT2G21050,AT2G22670,AT2G26330,AT2G26420,AT2G28150,AT2G30130,AT2G30340…
GO:BP	anatomical structure morphogenesis	GO:0009653	false	2.33334e-13	12.632	1047	2100	177	23046	AT1G01380,AT1G04160,AT1G05850,AT1G06490,AT1G07880,AT1G10480,AT1G11130,AT1G11160,AT1G12040,AT1G12560,AT1G12950,AT1G15570,AT1G16440,AT1G18370,AT1G18620,AT1G19350,AT1G20190,AT1G20930,AT1G21270,AT1G24620,AT1G27380,AT1G27740,AT1G31770,AT1G31880,AT1G44900,AT1G49430,AT1G55580,AT1G56580,AT1G62980,AT1G63450,AT1G64440,AT1G65060,AT1G66470,AT1G67710,AT1G68360,AT1G69970,AT1G70560,AT1G70940,AT1G71790,AT1G73360…
GO:BP	polysaccharide metabolic process	GO:0005976	false	1.45602e-12	11.8368	491	2100	102	23046	AT1G02730,AT1G02810,AT1G04680,AT1G05310,AT1G05850,AT1G06490,AT1G08990,AT1G09340,AT1G10670,AT1G11545,AT1G11920,AT1G13250,AT1G16860,AT1G19300,AT1G19940,AT1G23200,AT1G32900,AT1G33800,AT1G48930,AT1G53830,AT1G53840,AT1G54940,AT1G63450,AT1G64390,AT1G64440,AT1G67330,AT1G67750,AT1G70710,AT1G71930,AT1G75680,AT2G15440,AT2G18230,AT2G18800,AT2G19150,AT2G28315,AT2G33570,AT2G36870,AT2G37090,AT2G38320,AT2G39770…
GO:BP	tissue development	GO:0009888	false	2.47543e-11	10.6063	730	2100	131	23046	AT1G01380,AT1G03840,AT1G04160,AT1G05630,AT1G05850,AT1G08590,AT1G09540,AT1G10480,AT1G11130,AT1G12040,AT1G12560,AT1G12950,AT1G15570,AT1G16440,AT1G19850,AT1G20160,AT1G20930,AT1G24620,AT1G27740,AT1G31320,AT1G31880,AT1G32120,AT1G44900,AT1G46480,AT1G55580,AT1G56580,AT1G62990,AT1G63450,AT1G63650,AT1G64440,AT1G64625,AT1G66470,AT1G67710,AT1G68360,AT1G69440,AT1G69970,AT1G70410,AT1G70560,AT1G70940,AT1G71930…
GO:BP	system development	GO:0048731	false	3.92302e-11	10.4064	2087	2100	290	23046	AT1G01060,AT1G01380,AT1G02335,AT1G02730,AT1G02900,AT1G03840,AT1G04160,AT1G04250,AT1G04550,AT1G05630,AT1G05850,AT1G07750,AT1G07880,AT1G07890,AT1G08320,AT1G08590,AT1G09540,AT1G09560,AT1G10480,AT1G10670,AT1G11130,AT1G12040,AT1G12110,AT1G12430,AT1G12560,AT1G12820,AT1G12950,AT1G14280,AT1G15570,AT1G16300,AT1G16440,AT1G19300,AT1G19850,AT1G20823,AT1G21070,AT1G24620,AT1G27740,AT1G31070,AT1G31770,AT1G31880…
GO:BP	response to endogenous stimulus	GO:0009719	false	4.06285e-11	10.3912	1669	2100	243	23046	AT1G02340,AT1G03840,AT1G04180,AT1G04250,AT1G04550,AT1G04610,AT1G05630,AT1G05850,AT1G09310,AT1G10480,AT1G10560,AT1G12110,AT1G12420,AT1G12820,AT1G13420,AT1G15100,AT1G15550,AT1G16060,AT1G17750,AT1G18100,AT1G19350,AT1G19840,AT1G19850,AT1G20450,AT1G20930,AT1G23140,AT1G24020,AT1G24120,AT1G27740,AT1G28130,AT1G30690,AT1G31770,AT1G31880,AT1G32080,AT1G51140,AT1G52400,AT1G53130,AT1G54200,AT1G54990,AT1G56580…
GO:BP	response to inorganic substance	GO:0010035	true	4.76187e-11	10.3222	791	2100	138	23046	AT1G01620,AT1G02205,AT1G02730,AT1G05260,AT1G05850,AT1G07820,AT1G08430,AT1G09340,AT1G12110,AT1G12820,AT1G16060,AT1G20340,AT1G20450,AT1G20640,AT1G21140,AT1G31770,AT1G32080,AT1G32450,AT1G32540,AT1G51140,AT1G51400,AT1G52340,AT1G52400,AT1G52690,AT1G53130,AT1G62280,AT1G62660,AT1G64670,AT1G71050,AT1G71200,AT1G74520,AT1G76350,AT1G76800,AT2G01830,AT2G05070,AT2G05100,AT2G06050,AT2G15620,AT2G15970,AT2G17840…
GO:BP	response to hormone	GO:0009725	false	5.72221e-11	10.2424	1639	2100	239	23046	AT1G02340,AT1G03840,AT1G04180,AT1G04250,AT1G04550,AT1G04610,AT1G05630,AT1G05850,AT1G09310,AT1G10480,AT1G10560,AT1G12110,AT1G12420,AT1G12820,AT1G13420,AT1G15100,AT1G15550,AT1G16060,AT1G17750,AT1G18100,AT1G19350,AT1G19840,AT1G19850,AT1G20450,AT1G20930,AT1G23140,AT1G24020,AT1G24120,AT1G27740,AT1G28130,AT1G30690,AT1G31770,AT1G31880,AT1G32080,AT1G51140,AT1G52400,AT1G53130,AT1G54200,AT1G54990,AT1G56580…
GO:BP	root epidermal cell differentiation	GO:0010053	false	1.00871e-10	9.99623	146	2100	45	23046	AT1G01380,AT1G04160,AT1G05850,AT1G10480,AT1G11130,AT1G12040,AT1G12560,AT1G12950,AT1G16440,AT1G24620,AT1G27740,AT1G63450,AT1G64440,AT1G66470,AT1G70940,AT1G77110,AT2G03720,AT2G26420,AT2G38120,AT2G41970,AT2G45890,AT3G06300,AT3G07880,AT3G11600,AT3G25710,AT3G43960,AT3G53750,AT3G57630,AT3G62680,AT4G01060,AT4G02270,AT4G18640,AT4G30980,AT4G33880,AT5G05500,AT5G06270,AT5G37800,AT5G44610,AT5G49270,AT5G49680…
GO:BP	plant epidermis development	GO:0090558	false	1.31254e-10	9.88189	287	2100	68	23046	AT1G01380,AT1G04160,AT1G05850,AT1G10480,AT1G11130,AT1G12040,AT1G12560,AT1G12950,AT1G15570,AT1G16440,AT1G20160,AT1G24620,AT1G27740,AT1G56580,AT1G63450,AT1G63650,AT1G64440,AT1G66470,AT1G68360,AT1G70410,AT1G70940,AT1G73360,AT1G77110,AT1G80370,AT2G01570,AT2G03720,AT2G18790,AT2G26330,AT2G26420,AT2G38120,AT2G41970,AT2G45890,AT3G01500,AT3G06300,AT3G07880,AT3G11600,AT3G25710,AT3G43960,AT3G53750,AT3G54180…
GO:BP	multicellular organism development	GO:0007275	false	2.17974e-10	9.66159	2688	2100	352	23046	AT1G01060,AT1G01380,AT1G02335,AT1G02730,AT1G02900,AT1G03840,AT1G04160,AT1G04250,AT1G04550,AT1G05630,AT1G05850,AT1G07750,AT1G07880,AT1G07890,AT1G08320,AT1G08590,AT1G09090,AT1G09540,AT1G09560,AT1G10480,AT1G10560,AT1G10670,AT1G11130,AT1G12040,AT1G12110,AT1G12430,AT1G12560,AT1G12820,AT1G12950,AT1G14280,AT1G15570,AT1G16060,AT1G16300,AT1G16440,AT1G18100,AT1G18370,AT1G19300,AT1G19850,AT1G20160,AT1G20450…
GO:BP	response to abiotic stimulus	GO:0009628	false	4.15689e-10	9.38123	2173	2100	295	23046	AT1G01060,AT1G01120,AT1G01620,AT1G02205,AT1G02340,AT1G02730,AT1G04220,AT1G05260,AT1G05630,AT1G05850,AT1G07820,AT1G07890,AT1G08650,AT1G09090,AT1G09340,AT1G09350,AT1G10120,AT1G10670,AT1G12110,AT1G13080,AT1G14280,AT1G15100,AT1G15550,AT1G15820,AT1G16060,AT1G16390,AT1G16850,AT1G16920,AT1G17190,AT1G19350,AT1G20450,AT1G20823,AT1G22220,AT1G25450,AT1G29390,AT1G29910,AT1G29930,AT1G32080,AT1G33890,AT1G42970…
GO:BP	microtubule-based movement	GO:0007018	true	4.29233e-10	9.36731	65	2100	28	23046	AT1G09170,AT1G12430,AT1G18370,AT1G18550,AT1G72250,AT1G73860,AT2G21300,AT2G22610,AT2G28620,AT2G36200,AT2G47500,AT3G10310,AT3G19050,AT3G20150,AT3G23670,AT3G44050,AT3G45850,AT4G14150,AT4G14330,AT4G21270,AT4G24170,AT4G27180,AT4G38950,AT5G27000,AT5G47820,AT5G55520,AT5G60930,AT5G66310
GO:BP	transmembrane transport	GO:0055085	false	4.44593e-10	9.35204	1347	2100	202	23046	AT1G01620,AT1G08430,AT1G10800,AT1G11670,AT1G12110,AT1G12500,AT1G12950,AT1G14730,AT1G15210,AT1G15460,AT1G16390,AT1G18420,AT1G18880,AT1G20860,AT1G21070,AT1G21140,AT1G22710,AT1G25480,AT1G25530,AT1G30560,AT1G30840,AT1G31770,AT1G31880,AT1G32080,AT1G32450,AT1G33440,AT1G44800,AT1G48640,AT1G49960,AT1G51140,AT1G53270,AT1G58520,AT1G60050,AT1G60960,AT1G62280,AT1G62320,AT1G64200,AT1G64780,AT1G67940,AT1G68570…
GO:BP	trichoblast differentiation	GO:0010054	false	5.33776e-10	9.27264	130	2100	41	23046	AT1G01380,AT1G04160,AT1G10480,AT1G11130,AT1G12040,AT1G12560,AT1G12950,AT1G16440,AT1G24620,AT1G27740,AT1G63450,AT1G66470,AT1G70940,AT1G77110,AT2G03720,AT2G26420,AT2G38120,AT2G41970,AT2G45890,AT3G06300,AT3G11600,AT3G25710,AT3G43960,AT3G53750,AT3G57630,AT3G62680,AT4G01060,AT4G02270,AT4G18640,AT4G30980,AT4G33880,AT5G05500,AT5G06270,AT5G37800,AT5G44610,AT5G49270,AT5G49680,AT5G51310,AT5G58010,AT5G61350…
GO:BP	microtubule-based process	GO:0007017	false	5.77152e-10	9.23871	237	2100	59	23046	AT1G04820,AT1G09170,AT1G11160,AT1G12430,AT1G18370,AT1G18550,AT1G50010,AT1G69230,AT1G72250,AT1G73860,AT2G21300,AT2G22610,AT2G28620,AT2G36200,AT2G38160,AT2G47500,AT3G04630,AT3G06030,AT3G08670,AT3G10310,AT3G16800,AT3G19050,AT3G20150,AT3G20860,AT3G23090,AT3G23670,AT3G44050,AT3G45850,AT3G58650,AT3G60840,AT4G09550,AT4G14150,AT4G14330,AT4G18570,AT4G21270,AT4G22860,AT4G23496,AT4G24170,AT4G25190,AT4G26760…
GO:BP	lignin metabolic process	GO:0009808	false	1.00332e-09	8.99856	76	2100	30	23046	AT1G05250,AT1G07890,AT1G18140,AT1G33800,AT1G61590,AT2G30210,AT2G36880,AT2G37040,AT2G38080,AT2G40370,AT3G09220,AT3G11670,AT3G16340,AT3G19450,AT3G19820,AT3G55580,AT4G01070,AT4G26220,AT4G37970,AT4G39330,AT5G01190,AT5G03260,AT5G04330,AT5G05390,AT5G07130,AT5G48930,AT5G58910,AT5G60020,AT5G66390,AT5G66690
GO:BP	multicellular organismal process	GO:0032501	false	1.44233e-09	8.84094	2962	2100	377	23046	AT1G01060,AT1G01380,AT1G02335,AT1G02730,AT1G02900,AT1G03840,AT1G04030,AT1G04160,AT1G04250,AT1G04550,AT1G05630,AT1G05850,AT1G06490,AT1G07750,AT1G07880,AT1G07890,AT1G08320,AT1G08590,AT1G09090,AT1G09540,AT1G09560,AT1G10480,AT1G10560,AT1G10670,AT1G11130,AT1G12040,AT1G12110,AT1G12430,AT1G12560,AT1G12820,AT1G12950,AT1G14280,AT1G15570,AT1G16060,AT1G16300,AT1G16440,AT1G18100,AT1G18370,AT1G18880,AT1G19300…
GO:BP	plant epidermal cell differentiation	GO:0090627	false	1.92649e-09	8.71523	181	2100	49	23046	AT1G01380,AT1G04160,AT1G05850,AT1G10480,AT1G11130,AT1G12040,AT1G12560,AT1G12950,AT1G15570,AT1G16440,AT1G24620,AT1G27740,AT1G63450,AT1G64440,AT1G66470,AT1G70940,AT1G77110,AT2G03720,AT2G26420,AT2G38120,AT2G41970,AT2G45890,AT3G06300,AT3G07880,AT3G11600,AT3G25710,AT3G43960,AT3G53750,AT3G54180,AT3G57630,AT3G59420,AT3G62680,AT4G01060,AT4G02270,AT4G18640,AT4G30980,AT4G33880,AT4G34160,AT5G05500,AT5G06270…
GO:BP	response to oxygen-containing compound	GO:1901700	false	2.56446e-09	8.591	1698	2100	239	23046	AT1G01620,AT1G02205,AT1G02340,AT1G02730,AT1G03840,AT1G05260,AT1G05630,AT1G05850,AT1G07820,AT1G07890,AT1G08650,AT1G09310,AT1G09340,AT1G10480,AT1G10560,AT1G11350,AT1G12000,AT1G12110,AT1G12420,AT1G12820,AT1G15100,AT1G15550,AT1G16060,AT1G17750,AT1G18100,AT1G18670,AT1G19350,AT1G20160,AT1G20450,AT1G20640,AT1G21270,AT1G22160,AT1G22440,AT1G23140,AT1G24020,AT1G24100,AT1G24120,AT1G27130,AT1G29910,AT1G31770…
GO:BP	photosynthesis, light harvesting in photosystem I	GO:0009768	false	2.82126e-09	8.54956	23	2100	16	23046	AT1G08380,AT1G15820,AT1G29910,AT1G29930,AT1G61520,AT2G05070,AT2G05100,AT2G34420,AT3G08940,AT3G27690,AT3G47470,AT3G54890,AT3G61470,AT4G10340,AT5G01530,AT5G54270
GO:BP	plant-type secondary cell wall biogenesis	GO:0009834	false	3.55494e-09	8.44917	89	2100	32	23046	AT1G03870,AT1G33800,AT1G43790,AT1G62990,AT1G67330,AT1G73410,AT1G75500,AT1G79620,AT2G04780,AT2G15440,AT2G28315,AT2G36570,AT2G37090,AT2G38080,AT2G40320,AT3G18660,AT3G19820,AT3G50220,AT3G59690,AT4G03210,AT4G09990,AT4G18780,AT4G28500,AT4G33330,AT5G03170,AT5G12870,AT5G15630,AT5G17420,AT5G44030,AT5G48920,AT5G60490,AT5G67210
GO:BP	response to toxic substance	GO:0009636	true	4.75592e-09	8.32277	336	2100	72	23046	AT1G02950,AT1G04180,AT1G05250,AT1G05260,AT1G07890,AT1G09090,AT1G10360,AT1G11670,AT1G12110,AT1G12950,AT1G17190,AT1G19230,AT1G22440,AT1G27130,AT1G27140,AT1G30870,AT1G32540,AT1G44970,AT1G49860,AT1G53680,AT1G68850,AT1G71050,AT1G71695,AT1G71870,AT1G77490,AT1G78370,AT2G18150,AT2G18980,AT2G21045,AT2G29440,AT2G30860,AT2G38380,AT2G38390,AT2G40610,AT2G41480,AT2G48150,AT3G01190,AT3G01420,AT3G17790,AT3G20390…
GO:BP	response to organic substance	GO:0010033	false	8.04506e-09	8.09447	2071	2100	278	23046	AT1G02340,AT1G03840,AT1G04180,AT1G04250,AT1G04550,AT1G04610,AT1G05630,AT1G05850,AT1G08320,AT1G08650,AT1G09310,AT1G10480,AT1G10560,AT1G11350,AT1G12000,AT1G12110,AT1G12420,AT1G12820,AT1G13420,AT1G15100,AT1G15550,AT1G16060,AT1G17750,AT1G18100,AT1G18670,AT1G19350,AT1G19840,AT1G19850,AT1G20160,AT1G20450,AT1G20930,AT1G21270,AT1G22160,AT1G22440,AT1G23140,AT1G24020,AT1G24100,AT1G24120,AT1G27130,AT1G27740…
GO:BP	root hair cell differentiation	GO:0048765	false	9.99133e-09	8.00038	124	2100	38	23046	AT1G01380,AT1G04160,AT1G10480,AT1G12560,AT1G12950,AT1G16440,AT1G24620,AT1G27740,AT1G63450,AT1G66470,AT1G70940,AT1G77110,AT2G03720,AT2G26420,AT2G38120,AT2G41970,AT2G45890,AT3G06300,AT3G11600,AT3G25710,AT3G43960,AT3G53750,AT3G57630,AT4G01060,AT4G02270,AT4G18640,AT4G30980,AT4G33880,AT5G05500,AT5G06270,AT5G37800,AT5G44610,AT5G49270,AT5G49680,AT5G51310,AT5G58010,AT5G61350,AT5G65090
GO:BP	trichoblast maturation	GO:0048764	false	9.99133e-09	8.00038	124	2100	38	23046	AT1G01380,AT1G04160,AT1G10480,AT1G12560,AT1G12950,AT1G16440,AT1G24620,AT1G27740,AT1G63450,AT1G66470,AT1G70940,AT1G77110,AT2G03720,AT2G26420,AT2G38120,AT2G41970,AT2G45890,AT3G06300,AT3G11600,AT3G25710,AT3G43960,AT3G53750,AT3G57630,AT4G01060,AT4G02270,AT4G18640,AT4G30980,AT4G33880,AT5G05500,AT5G06270,AT5G37800,AT5G44610,AT5G49270,AT5G49680,AT5G51310,AT5G58010,AT5G61350,AT5G65090
GO:BP	cell wall macromolecule metabolic process	GO:0044036	false	1.11513e-08	7.95268	183	2100	48	23046	AT1G05850,AT1G08990,AT1G11545,AT1G19300,AT1G27120,AT1G33800,AT1G54940,AT1G56680,AT1G64440,AT1G67330,AT1G71930,AT2G15440,AT2G18800,AT2G36870,AT2G37090,AT2G38320,AT2G39770,AT2G40320,AT2G43610,AT3G16920,AT3G18660,AT3G21190,AT3G44990,AT3G50220,AT3G54420,AT3G57630,AT4G01700,AT4G02500,AT4G03210,AT4G08160,AT4G09990,AT4G33330,AT4G37800,AT5G01360,AT5G06610,AT5G13870,AT5G15630,AT5G15740,AT5G17420,AT5G22940…
GO:BP	cell maturation	GO:0048469	false	1.31057e-08	7.88254	125	2100	38	23046	AT1G01380,AT1G04160,AT1G10480,AT1G12560,AT1G12950,AT1G16440,AT1G24620,AT1G27740,AT1G63450,AT1G66470,AT1G70940,AT1G77110,AT2G03720,AT2G26420,AT2G38120,AT2G41970,AT2G45890,AT3G06300,AT3G11600,AT3G25710,AT3G43960,AT3G53750,AT3G57630,AT4G01060,AT4G02270,AT4G18640,AT4G30980,AT4G33880,AT5G05500,AT5G06270,AT5G37800,AT5G44610,AT5G49270,AT5G49680,AT5G51310,AT5G58010,AT5G61350,AT5G65090
GO:BP	detoxification	GO:0098754	false	1.43963e-08	7.84175	295	2100	65	23046	AT1G02950,AT1G05250,AT1G05260,AT1G07890,AT1G09090,AT1G10360,AT1G11670,AT1G12950,AT1G17190,AT1G19230,AT1G22440,AT1G27130,AT1G27140,AT1G30870,AT1G32540,AT1G44970,AT1G49860,AT1G53680,AT1G68850,AT1G71050,AT1G71695,AT1G71870,AT1G77490,AT1G78370,AT2G18150,AT2G18980,AT2G21045,AT2G29440,AT2G30860,AT2G38380,AT2G38390,AT2G41480,AT2G48150,AT3G01190,AT3G01420,AT3G17790,AT3G21770,AT3G32980,AT3G49960,AT3G53480…
GO:BP	plant-type cell wall biogenesis	GO:0009832	false	2.0879e-08	7.68029	186	2100	48	23046	AT1G02730,AT1G03870,AT1G33800,AT1G43790,AT1G62990,AT1G64440,AT1G67330,AT1G73410,AT1G75500,AT1G78580,AT1G79620,AT2G04780,AT2G15440,AT2G28315,AT2G36570,AT2G37090,AT2G38080,AT2G40320,AT3G02230,AT3G18660,AT3G19820,AT3G21190,AT3G50220,AT3G59690,AT4G02270,AT4G03210,AT4G09990,AT4G17220,AT4G18780,AT4G28500,AT4G33330,AT5G03170,AT5G06610,AT5G09870,AT5G12870,AT5G15630,AT5G15650,AT5G16490,AT5G17420,AT5G41040…
GO:BP	cellular response to chemical stimulus	GO:0070887	false	2.29432e-08	7.63935	1789	2100	245	23046	AT1G02340,AT1G03840,AT1G04250,AT1G04550,AT1G05250,AT1G05260,AT1G05630,AT1G05850,AT1G07890,AT1G09090,AT1G09340,AT1G10480,AT1G10560,AT1G11350,AT1G12110,AT1G12820,AT1G15100,AT1G15460,AT1G15550,AT1G16060,AT1G18100,AT1G18670,AT1G19230,AT1G19350,AT1G19850,AT1G20930,AT1G22220,AT1G22440,AT1G23140,AT1G24020,AT1G30690,AT1G30870,AT1G31770,AT1G31880,AT1G32080,AT1G32540,AT1G33890,AT1G44970,AT1G50740,AT1G51140…
GO:BP	growth	GO:0040007	false	6.35519e-08	7.19687	619	2100	107	23046	AT1G02900,AT1G03840,AT1G04160,AT1G05850,AT1G10480,AT1G11160,AT1G12040,AT1G12560,AT1G12950,AT1G16060,AT1G18620,AT1G21270,AT1G24620,AT1G27380,AT1G44900,AT1G48100,AT1G62990,AT1G63450,AT1G67710,AT1G69490,AT1G70370,AT1G70710,AT1G70940,AT1G74500,AT1G75500,AT1G77110,AT1G78580,AT1G79620,AT1G79860,AT2G01570,AT2G19690,AT2G19760,AT2G20610,AT2G23950,AT2G26330,AT2G26420,AT2G28350,AT2G28620,AT2G35650,AT2G36880…
GO:BP	carboxylic acid biosynthetic process	GO:0046394	true	1.00287e-07	6.99875	553	2100	98	23046	AT1G01120,AT1G04220,AT1G06080,AT1G08250,AT1G10670,AT1G16060,AT1G18870,AT1G22640,AT1G25450,AT1G26570,AT1G31230,AT1G48470,AT1G49820,AT1G52340,AT1G53130,AT1G64670,AT1G66200,AT1G67730,AT1G70560,AT1G75500,AT2G06050,AT2G13810,AT2G14750,AT2G17265,AT2G20610,AT2G22330,AT2G24300,AT2G27820,AT2G29980,AT2G32720,AT2G33230,AT2G34770,AT2G37040,AT2G38010,AT2G39770,AT2G39800,AT2G41090,AT2G41220,AT2G43100,AT2G43750…
GO:BP	water transport	GO:0006833	false	1.02252e-07	6.99033	38	2100	19	23046	AT1G01620,AT1G64670,AT2G16850,AT2G18790,AT2G25810,AT2G26330,AT2G36830,AT2G37170,AT2G37180,AT2G39010,AT2G45960,AT3G53420,AT3G54820,AT3G61430,AT4G00430,AT4G17340,AT4G19030,AT4G20140,AT4G35100
GO:BP	fluid transport	GO:0042044	true	1.02252e-07	6.99033	38	2100	19	23046	AT1G01620,AT1G64670,AT2G16850,AT2G18790,AT2G25810,AT2G26330,AT2G36830,AT2G37170,AT2G37180,AT2G39010,AT2G45960,AT3G53420,AT3G54820,AT3G61430,AT4G00430,AT4G17340,AT4G19030,AT4G20140,AT4G35100
GO:BP	small molecule metabolic process	GO:0044281	false	1.05808e-07	6.97548	1853	2100	249	23046	AT1G01120,AT1G04220,AT1G05630,AT1G05850,AT1G06080,AT1G06550,AT1G08250,AT1G09340,AT1G09350,AT1G10670,AT1G11860,AT1G12000,AT1G12110,AT1G12900,AT1G15550,AT1G16060,AT1G16300,AT1G16400,AT1G16410,AT1G18590,AT1G18870,AT1G22170,AT1G22440,AT1G22640,AT1G24100,AT1G25450,AT1G26360,AT1G26570,AT1G27130,AT1G31070,AT1G31230,AT1G42970,AT1G47840,AT1G48470,AT1G49430,AT1G49820,AT1G52340,AT1G52400,AT1G53130,AT1G53520…
GO:BP	small molecule biosynthetic process	GO:0044283	false	1.49423e-07	6.82558	757	2100	123	23046	AT1G01120,AT1G04220,AT1G06080,AT1G08250,AT1G10670,AT1G15550,AT1G16060,AT1G18870,AT1G22170,AT1G22640,AT1G25450,AT1G26570,AT1G31230,AT1G48470,AT1G49820,AT1G52340,AT1G53130,AT1G60550,AT1G64670,AT1G64970,AT1G66200,AT1G67730,AT1G70560,AT1G74470,AT1G75500,AT1G79790,AT1G80050,AT2G06050,AT2G13810,AT2G14750,AT2G17265,AT2G20610,AT2G21330,AT2G22240,AT2G22330,AT2G24300,AT2G27820,AT2G29980,AT2G32720,AT2G33230…
GO:BP	photosynthesis, light reaction	GO:0019684	false	2.13698e-07	6.6702	148	2100	40	23046	AT1G06680,AT1G08380,AT1G15820,AT1G29910,AT1G29930,AT1G30850,AT1G55670,AT1G60950,AT1G61520,AT1G67740,AT1G79040,AT2G01590,AT2G05070,AT2G05100,AT2G30570,AT2G34420,AT2G46820,AT3G08940,AT3G11670,AT3G16250,AT3G27690,AT3G47470,AT3G50820,AT3G54890,AT3G61470,AT4G03280,AT4G04020,AT4G05180,AT4G09650,AT4G10340,AT4G20190,AT4G21280,AT4G23890,AT5G01500,AT5G01530,AT5G02120,AT5G52100,AT5G54270,AT5G59400,AT5G66570
GO:BP	cell development	GO:0048468	false	2.38854e-07	6.62187	357	2100	71	23046	AT1G01380,AT1G04160,AT1G10480,AT1G12040,AT1G12560,AT1G12950,AT1G16440,AT1G20850,AT1G24620,AT1G27380,AT1G27740,AT1G56580,AT1G63450,AT1G66470,AT1G68360,AT1G70940,AT1G73360,AT1G77110,AT1G79860,AT2G03720,AT2G19690,AT2G26420,AT2G35650,AT2G36880,AT2G38120,AT2G41970,AT2G43750,AT2G45890,AT3G06300,AT3G11600,AT3G18000,AT3G25710,AT3G43960,AT3G53750,AT3G55360,AT3G57630,AT4G01060,AT4G02270,AT4G14750,AT4G18640…
GO:BP	response to water deprivation	GO:0009414	false	3.43546e-07	6.46402	419	2100	79	23046	AT1G01620,AT1G02205,AT1G02730,AT1G05260,AT1G05850,AT1G07820,AT1G09340,AT1G12110,AT1G16060,AT1G20450,AT1G32080,AT1G51140,AT1G52340,AT1G52400,AT1G52690,AT1G62280,AT1G62660,AT1G64670,AT1G74520,AT2G01830,AT2G05070,AT2G05100,AT2G15970,AT2G17840,AT2G25625,AT2G28740,AT2G33230,AT2G37040,AT2G37170,AT2G37180,AT2G38750,AT2G38760,AT2G39800,AT2G40750,AT2G42540,AT2G44060,AT2G45960,AT2G46140,AT2G47800,AT3G05640…
GO:BP	hydrogen peroxide catabolic process	GO:0042744	true	4.32736e-07	6.36378	99	2100	31	23046	AT1G05250,AT1G05260,AT1G07890,AT1G30870,AT1G44970,AT1G68850,AT1G71695,AT1G77490,AT2G18150,AT2G18980,AT2G38380,AT2G38390,AT2G41480,AT3G01190,AT3G21770,AT3G32980,AT3G49960,AT4G16270,AT4G21960,AT4G26010,AT4G36430,AT5G14130,AT5G16710,AT5G17820,AT5G22410,AT5G24070,AT5G42180,AT5G51890,AT5G64100,AT5G66390,AT5G67400
GO:BP	response to water	GO:0009415	false	5.1345e-07	6.2895	430	2100	80	23046	AT1G01620,AT1G02205,AT1G02730,AT1G05260,AT1G05850,AT1G07820,AT1G09340,AT1G12110,AT1G16060,AT1G20450,AT1G32080,AT1G51140,AT1G52340,AT1G52400,AT1G52690,AT1G62280,AT1G62660,AT1G64670,AT1G74520,AT2G01830,AT2G05070,AT2G05100,AT2G15970,AT2G17840,AT2G25625,AT2G28740,AT2G33230,AT2G37040,AT2G37170,AT2G37180,AT2G38750,AT2G38760,AT2G39800,AT2G40750,AT2G42540,AT2G44060,AT2G45960,AT2G46140,AT2G47800,AT3G05640…
GO:BP	cell differentiation	GO:0030154	false	7.64023e-07	6.11689	760	2100	121	23046	AT1G01380,AT1G04160,AT1G05850,AT1G08590,AT1G10480,AT1G11130,AT1G12040,AT1G12560,AT1G12950,AT1G15570,AT1G16440,AT1G20850,AT1G22330,AT1G22910,AT1G24620,AT1G27380,AT1G27740,AT1G31880,AT1G43790,AT1G56580,AT1G63450,AT1G63650,AT1G64440,AT1G66350,AT1G66470,AT1G68360,AT1G69970,AT1G70940,AT1G71930,AT1G73360,AT1G77110,AT1G78570,AT1G79860,AT2G01570,AT2G03720,AT2G19690,AT2G22540,AT2G26420,AT2G34790,AT2G35650…
GO:BP	organic acid biosynthetic process	GO:0016053	false	1.1848e-06	5.92635	586	2100	99	23046	AT1G01120,AT1G04220,AT1G06080,AT1G08250,AT1G10670,AT1G15550,AT1G16060,AT1G18870,AT1G22640,AT1G25450,AT1G26570,AT1G31230,AT1G48470,AT1G49820,AT1G52340,AT1G53130,AT1G64670,AT1G66200,AT1G67730,AT1G70560,AT1G75500,AT2G06050,AT2G13810,AT2G14750,AT2G17265,AT2G20610,AT2G22330,AT2G24300,AT2G27820,AT2G29980,AT2G32720,AT2G33230,AT2G34770,AT2G37040,AT2G38010,AT2G39770,AT2G39800,AT2G41090,AT2G41220,AT2G43100…
GO:BP	cell wall polysaccharide metabolic process	GO:0010383	false	1.50719e-06	5.82183	151	2100	39	23046	AT1G08990,AT1G11545,AT1G19300,AT1G33800,AT1G54940,AT1G64440,AT1G67330,AT1G71930,AT2G15440,AT2G18800,AT2G36870,AT2G37090,AT2G38320,AT2G40320,AT3G18660,AT3G21190,AT3G44990,AT3G50220,AT4G02500,AT4G03210,AT4G08160,AT4G09990,AT4G33330,AT4G37800,AT5G01360,AT5G06610,AT5G13870,AT5G15630,AT5G15740,AT5G17420,AT5G22940,AT5G41040,AT5G54690,AT5G57530,AT5G57540,AT5G59290,AT5G60950,AT5G62220,AT5G67210
GO:BP	response to light stimulus	GO:0009416	false	1.53991e-06	5.8125	777	2100	122	23046	AT1G01060,AT1G01120,AT1G02340,AT1G05630,AT1G08650,AT1G10120,AT1G10670,AT1G12110,AT1G14280,AT1G15550,AT1G15820,AT1G19350,AT1G25450,AT1G29910,AT1G29930,AT1G42970,AT1G44575,AT1G51140,AT1G51400,AT1G52410,AT1G59940,AT1G60950,AT1G61520,AT1G64860,AT1G67740,AT1G69570,AT1G70560,AT1G70800,AT1G70940,AT1G73590,AT1G78370,AT1G78580,AT1G78815,AT2G01570,AT2G03500,AT2G05070,AT2G05100,AT2G17265,AT2G17840,AT2G17990…
GO:BP	phloem or xylem histogenesis	GO:0010087	false	1.60175e-06	5.7954	127	2100	35	23046	AT1G05630,AT1G08590,AT1G09540,AT1G31320,AT1G31880,AT1G46480,AT1G62990,AT1G64625,AT1G69970,AT1G70560,AT1G71930,AT2G13820,AT2G26330,AT2G28250,AT2G38070,AT2G44830,AT2G45420,AT3G01670,AT3G01680,AT3G09070,AT3G20557,AT3G21710,AT3G22810,AT3G24770,AT3G59690,AT4G14740,AT4G20270,AT4G24670,AT4G31910,AT4G32880,AT5G06610,AT5G19530,AT5G60200,AT5G61480,AT5G64080
GO:BP	oxoacid metabolic process	GO:0043436	false	1.72912e-06	5.76217	1191	2100	170	23046	AT1G01120,AT1G04220,AT1G05850,AT1G06080,AT1G06550,AT1G08250,AT1G10670,AT1G11860,AT1G12000,AT1G12110,AT1G16060,AT1G16300,AT1G16400,AT1G16410,AT1G18590,AT1G18870,AT1G22170,AT1G22640,AT1G24100,AT1G25450,AT1G26360,AT1G26570,AT1G27130,AT1G31230,AT1G47840,AT1G48470,AT1G49430,AT1G49820,AT1G52340,AT1G52400,AT1G53130,AT1G53520,AT1G62190,AT1G62560,AT1G64670,AT1G66200,AT1G66270,AT1G67730,AT1G68360,AT1G68570…
GO:BP	cellular detoxification	GO:1990748	false	1.75599e-06	5.75548	190	2100	45	23046	AT1G05250,AT1G05260,AT1G07890,AT1G09090,AT1G19230,AT1G22440,AT1G30870,AT1G32540,AT1G44970,AT1G68850,AT1G71695,AT1G77490,AT2G18150,AT2G18980,AT2G30860,AT2G38380,AT2G38390,AT2G41480,AT2G48150,AT3G01190,AT3G01420,AT3G17790,AT3G21770,AT3G32980,AT3G49960,AT3G53480,AT4G16270,AT4G21960,AT4G22110,AT4G25090,AT4G25100,AT4G26010,AT4G36430,AT5G07390,AT5G14130,AT5G16710,AT5G17820,AT5G22410,AT5G24070,AT5G42180…
GO:BP	phosphorus metabolic process	GO:0006793	true	1.89924e-06	5.72142	2284	2100	289	23046	AT1G01610,AT1G03920,AT1G04700,AT1G05630,AT1G05640,AT1G07560,AT1G07880,AT1G08590,AT1G08650,AT1G09440,AT1G09450,AT1G10670,AT1G11130,AT1G11350,AT1G11915,AT1G12000,AT1G12330,AT1G14750,AT1G15570,AT1G16220,AT1G16300,AT1G16440,AT1G17750,AT1G18670,AT1G20610,AT1G20930,AT1G21270,AT1G22170,AT1G23540,AT1G26570,AT1G26970,AT1G29230,AT1G31070,AT1G31230,AT1G44110,AT1G47840,AT1G48480,AT1G48600,AT1G49580,AT1G49730…
GO:BP	developmental growth	GO:0048589	false	1.93383e-06	5.71358	504	2100	88	23046	AT1G03840,AT1G04160,AT1G10480,AT1G11160,AT1G12040,AT1G12560,AT1G12950,AT1G18620,AT1G21270,AT1G24620,AT1G27380,AT1G44900,AT1G62990,AT1G63450,AT1G67710,AT1G70940,AT1G75500,AT1G77110,AT1G78580,AT1G79620,AT1G79860,AT2G01570,AT2G19690,AT2G19760,AT2G23950,AT2G26420,AT2G28350,AT2G28620,AT2G35650,AT2G36880,AT2G41970,AT2G43750,AT2G45890,AT3G02170,AT3G07880,AT3G18000,AT3G19820,AT3G23090,AT3G24240,AT3G26610…
GO:BP	cellular response to toxic substance	GO:0097237	false	2.09705e-06	5.67839	191	2100	45	23046	AT1G05250,AT1G05260,AT1G07890,AT1G09090,AT1G19230,AT1G22440,AT1G30870,AT1G32540,AT1G44970,AT1G68850,AT1G71695,AT1G77490,AT2G18150,AT2G18980,AT2G30860,AT2G38380,AT2G38390,AT2G41480,AT2G48150,AT3G01190,AT3G01420,AT3G17790,AT3G21770,AT3G32980,AT3G49960,AT3G53480,AT4G16270,AT4G21960,AT4G22110,AT4G25090,AT4G25100,AT4G26010,AT4G36430,AT5G07390,AT5G14130,AT5G16710,AT5G17820,AT5G22410,AT5G24070,AT5G42180…
GO:BP	cellular oxidant detoxification	GO:0098869	false	2.27575e-06	5.64288	172	2100	42	23046	AT1G05250,AT1G05260,AT1G07890,AT1G09090,AT1G19230,AT1G30870,AT1G32540,AT1G44970,AT1G68850,AT1G71695,AT1G77490,AT2G18150,AT2G18980,AT2G30860,AT2G38380,AT2G38390,AT2G41480,AT2G48150,AT3G01190,AT3G01420,AT3G17790,AT3G21770,AT3G32980,AT3G49960,AT4G16270,AT4G21960,AT4G25090,AT4G25100,AT4G26010,AT4G36430,AT5G07390,AT5G14130,AT5G16710,AT5G17820,AT5G22410,AT5G24070,AT5G42180,AT5G51060,AT5G51890,AT5G64100…
GO:BP	response to radiation	GO:0009314	false	2.5123e-06	5.59993	800	2100	124	23046	AT1G01060,AT1G01120,AT1G02340,AT1G05630,AT1G08650,AT1G10120,AT1G10670,AT1G12110,AT1G14280,AT1G15550,AT1G15820,AT1G19350,AT1G25450,AT1G29910,AT1G29930,AT1G42970,AT1G44575,AT1G51140,AT1G51400,AT1G52410,AT1G59940,AT1G60950,AT1G61520,AT1G64860,AT1G67740,AT1G69570,AT1G70560,AT1G70800,AT1G70940,AT1G73590,AT1G78370,AT1G78580,AT1G78815,AT2G01570,AT2G03500,AT2G05070,AT2G05100,AT2G17265,AT2G17840,AT2G17990…
GO:BP	pectin metabolic process	GO:0045488	false	2.96427e-06	5.52808	167	2100	41	23046	AT1G02810,AT1G04680,AT1G05310,AT1G11920,AT1G13250,AT1G19300,AT1G23200,AT1G53830,AT1G53840,AT1G67750,AT2G18230,AT2G19150,AT2G28315,AT2G33570,AT3G07010,AT3G07970,AT3G09540,AT3G10710,AT3G21190,AT3G24670,AT3G26610,AT3G27400,AT3G47400,AT3G49220,AT3G53190,AT3G62660,AT4G13710,AT4G22080,AT4G24780,AT5G01360,AT5G04960,AT5G04970,AT5G09760,AT5G15490,AT5G15740,AT5G17420,AT5G20860,AT5G41040,AT5G54690,AT5G55590…
GO:BP	cellular carbohydrate metabolic process	GO:0044262	false	3.50129e-06	5.45577	510	2100	88	23046	AT1G02730,AT1G05630,AT1G05850,AT1G06490,AT1G08990,AT1G10670,AT1G11545,AT1G12000,AT1G16860,AT1G19300,AT1G19940,AT1G22650,AT1G22710,AT1G32900,AT1G33800,AT1G47840,AT1G48930,AT1G54940,AT1G62660,AT1G64390,AT1G64440,AT1G66970,AT1G67330,AT1G70710,AT1G71930,AT1G75680,AT1G78090,AT1G78580,AT2G15440,AT2G18800,AT2G22190,AT2G22240,AT2G28315,AT2G32010,AT2G36870,AT2G37090,AT2G38320,AT2G39770,AT2G40320,AT3G02040…
GO:BP	lignin catabolic process	GO:0046274	false	3.50208e-06	5.45567	18	2100	12	23046	AT1G18140,AT2G30210,AT2G37040,AT2G38080,AT2G40370,AT3G09220,AT5G01190,AT5G03260,AT5G05390,AT5G07130,AT5G58910,AT5G60020
GO:BP	phenylpropanoid catabolic process	GO:0046271	false	3.50208e-06	5.45567	18	2100	12	23046	AT1G18140,AT2G30210,AT2G37040,AT2G38080,AT2G40370,AT3G09220,AT5G01190,AT5G03260,AT5G05390,AT5G07130,AT5G58910,AT5G60020
GO:BP	galacturonan metabolic process	GO:0010393	false	3.58002e-06	5.44611	168	2100	41	23046	AT1G02810,AT1G04680,AT1G05310,AT1G11920,AT1G13250,AT1G19300,AT1G23200,AT1G53830,AT1G53840,AT1G67750,AT2G18230,AT2G19150,AT2G28315,AT2G33570,AT3G07010,AT3G07970,AT3G09540,AT3G10710,AT3G21190,AT3G24670,AT3G26610,AT3G27400,AT3G47400,AT3G49220,AT3G53190,AT3G62660,AT4G13710,AT4G22080,AT4G24780,AT5G01360,AT5G04960,AT5G04970,AT5G09760,AT5G15490,AT5G15740,AT5G17420,AT5G20860,AT5G41040,AT5G54690,AT5G55590…
GO:BP	organic acid metabolic process	GO:0006082	false	4.74063e-06	5.32416	1234	2100	173	23046	AT1G01120,AT1G04220,AT1G05850,AT1G06080,AT1G06550,AT1G08250,AT1G10670,AT1G11860,AT1G12000,AT1G12110,AT1G15550,AT1G16060,AT1G16300,AT1G16400,AT1G16410,AT1G18590,AT1G18870,AT1G22170,AT1G22640,AT1G24100,AT1G25450,AT1G26360,AT1G26570,AT1G27130,AT1G31230,AT1G47840,AT1G48470,AT1G49430,AT1G49820,AT1G52340,AT1G52400,AT1G53130,AT1G53520,AT1G62190,AT1G62560,AT1G64670,AT1G66200,AT1G66270,AT1G67730,AT1G68360…
GO:BP	hemicellulose metabolic process	GO:0010410	false	4.83226e-06	5.31585	114	2100	32	23046	AT1G08990,AT1G11545,AT1G19300,AT1G33800,AT1G54940,AT1G64440,AT1G67330,AT1G71930,AT2G15440,AT2G18800,AT2G36870,AT2G37090,AT2G38320,AT2G40320,AT3G18660,AT3G44990,AT3G50220,AT4G02500,AT4G03210,AT4G08160,AT4G09990,AT4G33330,AT4G37800,AT5G01360,AT5G13870,AT5G22940,AT5G54690,AT5G57530,AT5G57540,AT5G59290,AT5G62220,AT5G67210
GO:BP	photosynthesis, light harvesting	GO:0009765	false	5.19908e-06	5.28407	37	2100	17	23046	AT1G08380,AT1G15820,AT1G29910,AT1G29930,AT1G61520,AT2G05070,AT2G05100,AT2G34420,AT3G08940,AT3G27690,AT3G47470,AT3G54890,AT3G61470,AT4G10340,AT5G01500,AT5G01530,AT5G54270
GO:BP	cell wall modification	GO:0042545	false	5.61572e-06	5.25059	145	2100	37	23046	AT1G02810,AT1G05310,AT1G19300,AT1G23200,AT1G24100,AT1G48100,AT1G53830,AT1G53840,AT1G67330,AT1G70370,AT1G70710,AT1G73360,AT2G18230,AT2G18800,AT2G19150,AT2G22330,AT2G27370,AT2G31220,AT2G36100,AT3G07970,AT3G10710,AT3G11550,AT3G47400,AT3G49220,AT4G26850,AT4G34980,AT4G39010,AT5G01360,AT5G04960,AT5G04970,AT5G06200,AT5G09760,AT5G14650,AT5G20860,AT5G50800,AT5G55590,AT5G56320
GO:BP	response to acid chemical	GO:0001101	false	5.70857e-06	5.24347	460	2100	81	23046	AT1G01620,AT1G02205,AT1G02730,AT1G05260,AT1G05850,AT1G07820,AT1G09340,AT1G12110,AT1G16060,AT1G20450,AT1G32080,AT1G51140,AT1G52340,AT1G52400,AT1G52690,AT1G62280,AT1G62660,AT1G64670,AT1G74520,AT2G01830,AT2G05070,AT2G05100,AT2G15970,AT2G17840,AT2G25625,AT2G28740,AT2G33230,AT2G37040,AT2G37170,AT2G37180,AT2G38750,AT2G38760,AT2G39800,AT2G40750,AT2G42540,AT2G44060,AT2G45960,AT2G46140,AT2G47800,AT3G05640…
GO:BP	hormone transport	GO:0009914	false	7.47945e-06	5.12613	134	2100	35	23046	AT1G10030,AT1G12110,AT1G17140,AT1G30690,AT1G31770,AT1G31880,AT1G54200,AT1G54990,AT1G69160,AT1G70560,AT1G70940,AT1G73590,AT1G75500,AT1G77110,AT1G77690,AT1G78100,AT1G78570,AT2G01420,AT2G26260,AT2G38120,AT2G44830,AT2G47260,AT3G13980,AT3G14370,AT3G28860,AT3G53480,AT4G09160,AT4G11880,AT4G30960,AT4G38430,AT5G01240,AT5G01990,AT5G13930,AT5G19530,AT5G65980
GO:BP	xylan biosynthetic process	GO:0045492	false	8.6086e-06	5.06507	38	2100	17	23046	AT1G08990,AT1G19300,AT1G33800,AT1G54940,AT1G67330,AT2G15440,AT2G37090,AT2G38320,AT3G18660,AT3G50220,AT4G09990,AT4G33330,AT5G01360,AT5G22940,AT5G54690,AT5G59290,AT5G67210
GO:BP	lipid metabolic process	GO:0006629	false	9.22428e-06	5.03507	1174	2100	165	23046	AT1G01120,AT1G01610,AT1G02205,AT1G04220,AT1G05630,AT1G06080,AT1G10030,AT1G10040,AT1G10670,AT1G15550,AT1G16060,AT1G18180,AT1G25450,AT1G26360,AT1G28590,AT1G28670,AT1G31950,AT1G33700,AT1G33750,AT1G34520,AT1G45201,AT1G48600,AT1G48800,AT1G48820,AT1G49430,AT1G52340,AT1G52400,AT1G53130,AT1G53520,AT1G54790,AT1G56630,AT1G56670,AT1G58520,AT1G60810,AT1G62190,AT1G64670,AT1G66020,AT1G66970,AT1G67730,AT1G69240…
GO:BP	cellular polysaccharide metabolic process	GO:0044264	false	9.23703e-06	5.03447	320	2100	62	23046	AT1G02730,AT1G05850,AT1G06490,AT1G08990,AT1G10670,AT1G11545,AT1G16860,AT1G19300,AT1G19940,AT1G32900,AT1G33800,AT1G48930,AT1G54940,AT1G64390,AT1G64440,AT1G67330,AT1G70710,AT1G71930,AT1G75680,AT2G15440,AT2G18800,AT2G36870,AT2G37090,AT2G38320,AT2G39770,AT2G40320,AT3G14570,AT3G18660,AT3G21190,AT3G44990,AT3G50220,AT4G02290,AT4G02500,AT4G03210,AT4G08160,AT4G09990,AT4G11050,AT4G18780,AT4G20460,AT4G24620…
GO:BP	cytoskeleton organization	GO:0007010	false	1.04482e-05	4.98096	321	2100	62	23046	AT1G01750,AT1G04160,AT1G04820,AT1G11160,AT1G24764,AT1G50010,AT1G69230,AT1G71790,AT2G19760,AT2G28620,AT2G29890,AT2G31900,AT2G33385,AT2G34150,AT2G36200,AT2G38160,AT2G40820,AT3G04630,AT3G05470,AT3G06030,AT3G08670,AT3G12110,AT3G16800,AT3G19050,AT3G20860,AT3G23090,AT3G23670,AT3G44050,AT3G53750,AT3G56480,AT3G58650,AT3G60840,AT4G00680,AT4G09550,AT4G14150,AT4G17220,AT4G18570,AT4G21270,AT4G22860,AT4G23496…
GO:BP	auxin transport	GO:0060918	false	1.45052e-05	4.83848	131	2100	34	23046	AT1G10030,AT1G12110,AT1G17140,AT1G30690,AT1G31880,AT1G54200,AT1G54990,AT1G69160,AT1G70560,AT1G70940,AT1G73590,AT1G75500,AT1G77110,AT1G77690,AT1G78100,AT1G78570,AT2G01420,AT2G26260,AT2G38120,AT2G44830,AT2G47260,AT3G13980,AT3G14370,AT3G28860,AT3G53480,AT4G09160,AT4G11880,AT4G30960,AT4G38430,AT5G01240,AT5G01990,AT5G13930,AT5G19530,AT5G65980
GO:BP	cellular developmental process	GO:0048869	false	1.48225e-05	4.82908	841	2100	126	23046	AT1G01380,AT1G04160,AT1G05850,AT1G08590,AT1G10480,AT1G11130,AT1G12040,AT1G12560,AT1G12950,AT1G15570,AT1G16440,AT1G20850,AT1G22330,AT1G22910,AT1G24620,AT1G27380,AT1G27740,AT1G31880,AT1G43790,AT1G56580,AT1G63450,AT1G63650,AT1G64440,AT1G65060,AT1G66350,AT1G66470,AT1G68360,AT1G69970,AT1G70940,AT1G71830,AT1G71930,AT1G73360,AT1G77110,AT1G78570,AT1G79860,AT2G01570,AT2G03720,AT2G19690,AT2G22540,AT2G26420…
GO:BP	carbohydrate biosynthetic process	GO:0016051	false	1.49781e-05	4.82454	369	2100	68	23046	AT1G02730,AT1G05850,AT1G06490,AT1G08990,AT1G10670,AT1G12900,AT1G13250,AT1G16860,AT1G19300,AT1G22170,AT1G32900,AT1G33800,AT1G42970,AT1G54940,AT1G63450,AT1G64440,AT1G67090,AT1G67330,AT1G78090,AT1G78580,AT2G15440,AT2G21330,AT2G22190,AT2G22240,AT2G28315,AT2G33570,AT2G37090,AT2G38320,AT2G39770,AT2G41090,AT3G02870,AT3G14570,AT3G18660,AT3G21190,AT3G50220,AT3G52930,AT3G62660,AT4G02500,AT4G09990,AT4G10120…
GO:BP	lateral root formation	GO:0010311	false	2.18651e-05	4.66025	54	2100	20	23046	AT1G07880,AT1G15570,AT1G49430,AT1G77690,AT2G22670,AT2G30340,AT2G38120,AT2G45420,AT3G20860,AT3G22400,AT3G24300,AT3G30260,AT3G58190,AT3G59420,AT4G16780,AT4G37070,AT5G56320,AT5G57390,AT5G57740,AT5G66815
GO:BP	developmental maturation	GO:0021700	false	2.2235e-05	4.65296	240	2100	50	23046	AT1G01380,AT1G04160,AT1G07750,AT1G10480,AT1G12560,AT1G12820,AT1G12950,AT1G16440,AT1G24620,AT1G27740,AT1G63450,AT1G66350,AT1G66470,AT1G69490,AT1G70940,AT1G71830,AT1G77110,AT2G01570,AT2G03720,AT2G26420,AT2G38120,AT2G40170,AT2G41970,AT2G45890,AT3G03450,AT3G06300,AT3G10420,AT3G11600,AT3G25710,AT3G43960,AT3G47860,AT3G53750,AT3G57630,AT3G63210,AT4G01060,AT4G02270,AT4G18640,AT4G30980,AT4G33880,AT5G05500…
GO:BP	organic acid transport	GO:0015849	true	2.86104e-05	4.54348	147	2100	36	23046	AT1G08430,AT1G18420,AT1G25480,AT1G25530,AT1G32080,AT1G44800,AT1G48640,AT1G50740,AT1G71960,AT1G77690,AT2G19690,AT2G21050,AT2G24762,AT2G34390,AT2G38120,AT2G39510,AT2G40900,AT2G41190,AT2G48130,AT3G01760,AT3G53510,AT3G61680,AT4G25010,AT4G25760,AT4G31730,AT5G01240,AT5G01340,AT5G09220,AT5G13580,AT5G38820,AT5G46600,AT5G49630,AT5G50800,AT5G54800,AT5G57685,AT5G63850
GO:BP	anatomical structure maturation	GO:0071695	false	2.98862e-05	4.52453	221	2100	47	23046	AT1G01380,AT1G04160,AT1G07750,AT1G10480,AT1G12560,AT1G12950,AT1G16440,AT1G24620,AT1G27740,AT1G63450,AT1G66350,AT1G66470,AT1G69490,AT1G70940,AT1G77110,AT2G01570,AT2G03720,AT2G26420,AT2G38120,AT2G40170,AT2G41970,AT2G45890,AT3G03450,AT3G06300,AT3G10420,AT3G11600,AT3G25710,AT3G43960,AT3G47860,AT3G53750,AT3G57630,AT3G63210,AT4G01060,AT4G02270,AT4G18640,AT4G30980,AT4G33880,AT5G05500,AT5G06270,AT5G37800…
GO:BP	cell growth	GO:0016049	false	3.13945e-05	4.50315	430	2100	75	23046	AT1G02900,AT1G04160,AT1G05850,AT1G10480,AT1G11160,AT1G12040,AT1G12560,AT1G12950,AT1G18620,AT1G21270,AT1G24620,AT1G27380,AT1G48100,AT1G63450,AT1G69490,AT1G70370,AT1G70710,AT1G70940,AT1G75500,AT1G77110,AT1G79620,AT1G79860,AT2G19690,AT2G19760,AT2G20610,AT2G26330,AT2G26420,AT2G28620,AT2G35650,AT2G36880,AT2G41970,AT2G43750,AT2G45890,AT3G02170,AT3G07880,AT3G18000,AT3G19820,AT3G20557,AT3G23090,AT3G26610…
GO:BP	microtubule cytoskeleton organization	GO:0000226	false	3.53323e-05	4.45183	181	2100	41	23046	AT1G04820,AT1G11160,AT1G50010,AT1G69230,AT2G28620,AT2G36200,AT2G38160,AT3G04630,AT3G06030,AT3G08670,AT3G16800,AT3G19050,AT3G20860,AT3G23090,AT3G23670,AT3G44050,AT3G58650,AT3G60840,AT4G09550,AT4G14150,AT4G18570,AT4G21270,AT4G22860,AT4G23496,AT4G25190,AT4G26760,AT4G27180,AT4G32830,AT5G01280,AT5G01840,AT5G12250,AT5G14790,AT5G15510,AT5G15600,AT5G23860,AT5G44610,AT5G47820,AT5G51600,AT5G60930,AT5G62500…
GO:BP	monocarboxylic acid biosynthetic process	GO:0072330	false	4.12228e-05	4.38486	266	2100	53	23046	AT1G01120,AT1G04220,AT1G06080,AT1G10670,AT1G16060,AT1G18870,AT1G22640,AT1G25450,AT1G52340,AT1G53130,AT1G64670,AT1G67730,AT1G70560,AT2G06050,AT2G13810,AT2G20610,AT2G22330,AT2G24300,AT2G29980,AT2G32720,AT2G33230,AT2G34770,AT2G37040,AT2G38010,AT3G01420,AT3G05020,AT3G06460,AT3G06650,AT3G10340,AT3G14440,AT3G22400,AT3G23820,AT3G25110,AT3G55360,AT4G01900,AT4G13840,AT4G24670,AT4G30440,AT4G34250,AT5G02890…
GO:BP	sulfur compound biosynthetic process	GO:0044272	false	5.25095e-05	4.27976	170	2100	39	23046	AT1G10670,AT1G16400,AT1G16410,AT1G18590,AT1G24100,AT1G31230,AT1G49820,AT1G60810,AT1G62560,AT1G74090,AT2G14750,AT2G17265,AT2G20610,AT2G22330,AT2G36880,AT2G43100,AT2G43750,AT3G03780,AT3G06650,AT3G19710,AT3G22740,AT3G22890,AT3G58990,AT3G63250,AT4G01850,AT4G12030,AT4G13430,AT4G13770,AT4G14680,AT4G15560,AT4G33030,AT4G39940,AT5G01220,AT5G14200,AT5G17920,AT5G23010,AT5G23020,AT5G49460,AT5G61420
GO:BP	root hair cell development	GO:0080147	false	5.82366e-05	4.2348	101	2100	28	23046	AT1G01380,AT1G04160,AT1G10480,AT1G12560,AT1G12950,AT1G16440,AT1G24620,AT1G63450,AT1G70940,AT1G77110,AT2G26420,AT2G41970,AT2G45890,AT3G06300,AT3G11600,AT3G25710,AT3G43960,AT3G53750,AT3G57630,AT4G02270,AT4G30980,AT5G05500,AT5G06270,AT5G44610,AT5G49680,AT5G51310,AT5G58010,AT5G61350
GO:BP	monocarboxylic acid metabolic process	GO:0032787	false	5.91617e-05	4.22796	549	2100	89	23046	AT1G01120,AT1G04220,AT1G05850,AT1G06080,AT1G10670,AT1G12000,AT1G16060,AT1G16300,AT1G18870,AT1G22170,AT1G22640,AT1G25450,AT1G26360,AT1G47840,AT1G49430,AT1G52340,AT1G52400,AT1G53130,AT1G53520,AT1G62190,AT1G64670,AT1G67730,AT1G69240,AT1G70560,AT1G77590,AT1G79530,AT2G06050,AT2G11810,AT2G13810,AT2G18790,AT2G20610,AT2G21330,AT2G22330,AT2G24300,AT2G29980,AT2G32720,AT2G33230,AT2G34770,AT2G37040,AT2G38010…
GO:BP	carboxylic acid metabolic process	GO:0019752	false	5.92341e-05	4.22743	1063	2100	149	23046	AT1G01120,AT1G04220,AT1G05850,AT1G06080,AT1G06550,AT1G08250,AT1G10670,AT1G11860,AT1G12000,AT1G16060,AT1G16300,AT1G18870,AT1G22170,AT1G22640,AT1G25450,AT1G26360,AT1G26570,AT1G31230,AT1G47840,AT1G48470,AT1G49430,AT1G49820,AT1G52340,AT1G52400,AT1G53130,AT1G53520,AT1G62190,AT1G64670,AT1G66200,AT1G67730,AT1G69240,AT1G70560,AT1G75500,AT1G77590,AT1G79530,AT2G06050,AT2G11810,AT2G13810,AT2G14750,AT2G17265…
GO:BP	tropism	GO:0009606	true	6.64541e-05	4.17748	126	2100	32	23046	AT1G05630,AT1G14280,AT1G70560,AT1G70800,AT1G70940,AT1G73590,AT2G01420,AT2G17990,AT2G18790,AT2G19690,AT2G21650,AT2G38120,AT2G41660,AT2G43010,AT2G44830,AT3G17600,AT3G25640,AT3G28860,AT3G44610,AT3G45780,AT3G48550,AT3G62100,AT4G24670,AT5G03640,AT5G06990,AT5G23100,AT5G58140,AT5G62500,AT5G65340,AT5G65683,AT5G66815,AT5G67270
GO:BP	polysaccharide catabolic process	GO:0000272	false	6.93765e-05	4.15879	192	2100	42	23046	AT1G02810,AT1G04680,AT1G05310,AT1G09340,AT1G11920,AT1G19940,AT1G23200,AT1G48930,AT1G53830,AT1G53840,AT1G64390,AT1G67750,AT1G70710,AT1G75680,AT2G19150,AT2G43610,AT3G07010,AT3G07970,AT3G09540,AT3G10710,AT3G24670,AT3G26610,AT3G27400,AT3G47010,AT3G47050,AT3G47400,AT3G49220,AT3G53190,AT3G54420,AT4G02290,AT4G08160,AT4G11050,AT4G13710,AT4G22080,AT4G24780,AT4G39010,AT5G04960,AT5G04970,AT5G09760,AT5G20860…
GO:BP	protein phosphorylation	GO:0006468	false	7.37164e-05	4.13244	1183	2100	162	23046	AT1G03920,AT1G04700,AT1G07560,AT1G07880,AT1G08590,AT1G08650,AT1G09440,AT1G09450,AT1G11130,AT1G11350,AT1G14750,AT1G15570,AT1G16440,AT1G17750,AT1G18670,AT1G20610,AT1G20930,AT1G21270,AT1G23540,AT1G26970,AT1G29230,AT1G44110,AT1G48480,AT1G49580,AT1G49730,AT1G51805,AT1G51830,AT1G52290,AT1G61590,AT1G61860,AT1G61950,AT1G64210,AT1G65250,AT1G68330,AT1G68400,AT1G69990,AT1G70210,AT1G70460,AT1G71830,AT1G73080…
GO:BP	phosphate-containing compound metabolic process	GO:0006796	false	8.2209e-05	4.08508	2239	2100	275	23046	AT1G01610,AT1G03920,AT1G04700,AT1G05630,AT1G05640,AT1G07560,AT1G07880,AT1G08590,AT1G08650,AT1G09440,AT1G09450,AT1G10670,AT1G11130,AT1G11350,AT1G11915,AT1G12000,AT1G12330,AT1G14750,AT1G15570,AT1G16220,AT1G16300,AT1G16440,AT1G17750,AT1G18670,AT1G20610,AT1G20930,AT1G21270,AT1G22170,AT1G23540,AT1G26970,AT1G29230,AT1G31230,AT1G44110,AT1G47840,AT1G48480,AT1G48600,AT1G49580,AT1G49730,AT1G49820,AT1G51805…
GO:BP	glycosinolate biosynthetic process	GO:0019758	true	8.82869e-05	4.0541	48	2100	18	23046	AT1G16400,AT1G16410,AT1G18590,AT1G24100,AT1G62560,AT1G74090,AT2G20610,AT2G22330,AT2G43100,AT3G19710,AT3G58990,AT4G12030,AT4G13430,AT4G13770,AT5G14200,AT5G23010,AT5G23020,AT5G61420
GO:BP	glucosinolate biosynthetic process	GO:0019761	false	8.82869e-05	4.0541	48	2100	18	23046	AT1G16400,AT1G16410,AT1G18590,AT1G24100,AT1G62560,AT1G74090,AT2G20610,AT2G22330,AT2G43100,AT3G19710,AT3G58990,AT4G12030,AT4G13430,AT4G13770,AT5G14200,AT5G23010,AT5G23020,AT5G61420
GO:BP	hydrogen peroxide metabolic process	GO:0042743	false	0.000104687	3.98011	122	2100	31	23046	AT1G05250,AT1G05260,AT1G07890,AT1G30870,AT1G44970,AT1G68850,AT1G71695,AT1G77490,AT2G18150,AT2G18980,AT2G38380,AT2G38390,AT2G41480,AT3G01190,AT3G21770,AT3G32980,AT3G49960,AT4G16270,AT4G21960,AT4G26010,AT4G36430,AT5G14130,AT5G16710,AT5G17820,AT5G22410,AT5G24070,AT5G42180,AT5G51890,AT5G64100,AT5G66390,AT5G67400
GO:BP	cellular carbohydrate biosynthetic process	GO:0034637	false	0.000105073	3.97851	237	2100	48	23046	AT1G02730,AT1G05850,AT1G06490,AT1G08990,AT1G10670,AT1G16860,AT1G19300,AT1G32900,AT1G33800,AT1G54940,AT1G64440,AT1G67330,AT1G78090,AT1G78580,AT2G15440,AT2G22190,AT2G22240,AT2G37090,AT2G38320,AT2G39770,AT3G02870,AT3G14570,AT3G18660,AT3G21190,AT3G50220,AT4G02500,AT4G09990,AT4G10120,AT4G18780,AT4G20460,AT4G33330,AT5G01360,AT5G06610,AT5G09870,AT5G10170,AT5G11110,AT5G15630,AT5G17420,AT5G22940,AT5G41040…
GO:BP	pectin catabolic process	GO:0045490	false	0.000114924	3.93959	98	2100	27	23046	AT1G02810,AT1G04680,AT1G05310,AT1G11920,AT1G23200,AT1G53830,AT1G53840,AT1G67750,AT2G19150,AT3G07010,AT3G07970,AT3G09540,AT3G10710,AT3G24670,AT3G26610,AT3G27400,AT3G47400,AT3G49220,AT3G53190,AT4G13710,AT4G22080,AT4G24780,AT5G04960,AT5G04970,AT5G09760,AT5G20860,AT5G55590
GO:BP	xylan metabolic process	GO:0045491	false	0.000121678	3.91479	59	2100	20	23046	AT1G08990,AT1G19300,AT1G33800,AT1G54940,AT1G67330,AT1G71930,AT2G15440,AT2G37090,AT2G38320,AT2G40320,AT3G18660,AT3G50220,AT4G08160,AT4G09990,AT4G33330,AT5G01360,AT5G22940,AT5G54690,AT5G59290,AT5G67210
GO:BP	lipid biosynthetic process	GO:0008610	false	0.000136391	3.86522	693	2100	105	23046	AT1G01120,AT1G01610,AT1G02205,AT1G04220,AT1G06080,AT1G10030,AT1G10670,AT1G15550,AT1G16060,AT1G25450,AT1G31950,AT1G33750,AT1G48600,AT1G48800,AT1G48820,AT1G49430,AT1G52340,AT1G53130,AT1G64670,AT1G66020,AT1G67730,AT1G73600,AT1G78950,AT1G78970,AT2G06050,AT2G11810,AT2G22240,AT2G26260,AT2G26420,AT2G28850,AT2G28860,AT2G29980,AT2G32720,AT2G34770,AT2G37700,AT2G38010,AT2G38700,AT2G45400,AT2G45970,AT3G01420…
GO:BP	cell wall macromolecule biosynthetic process	GO:0044038	false	0.0001425	3.84618	93	2100	26	23046	AT1G08990,AT1G19300,AT1G33800,AT1G54940,AT1G64440,AT1G67330,AT2G15440,AT2G37090,AT2G38320,AT2G39770,AT3G18660,AT3G21190,AT3G50220,AT4G02500,AT4G09990,AT4G33330,AT5G01360,AT5G06610,AT5G15630,AT5G22940,AT5G41040,AT5G54690,AT5G59290,AT5G60950,AT5G62220,AT5G67210
GO:BP	cellular component macromolecule biosynthetic process	GO:0070589	false	0.0001425	3.84618	93	2100	26	23046	AT1G08990,AT1G19300,AT1G33800,AT1G54940,AT1G64440,AT1G67330,AT2G15440,AT2G37090,AT2G38320,AT2G39770,AT3G18660,AT3G21190,AT3G50220,AT4G02500,AT4G09990,AT4G33330,AT5G01360,AT5G06610,AT5G15630,AT5G22940,AT5G41040,AT5G54690,AT5G59290,AT5G60950,AT5G62220,AT5G67210
GO:BP	organic acid transmembrane transport	GO:1903825	false	0.00014341	3.84342	105	2100	28	23046	AT1G08430,AT1G18420,AT1G25480,AT1G25530,AT1G32080,AT1G44800,AT1G48640,AT1G77690,AT2G21050,AT2G24762,AT2G34390,AT2G38120,AT2G39510,AT2G41190,AT3G01760,AT3G53510,AT4G25010,AT4G25760,AT4G31730,AT5G01240,AT5G01340,AT5G09220,AT5G13580,AT5G38820,AT5G49630,AT5G50800,AT5G57685,AT5G63850
GO:BP	pigment biosynthetic process	GO:0046148	true	0.000160278	3.79513	150	2100	35	23046	AT1G03630,AT1G06000,AT1G10670,AT1G30530,AT1G58290,AT1G69690,AT1G70000,AT1G74470,AT1G78570,AT2G28350,AT2G35260,AT2G47460,AT3G14530,AT3G20160,AT3G21560,AT3G25710,AT3G32040,AT3G56940,AT3G59400,AT4G01900,AT4G15560,AT4G27430,AT4G27440,AT4G31920,AT5G08640,AT5G13630,AT5G13930,AT5G17230,AT5G41315,AT5G42800,AT5G52570,AT5G56860,AT5G57030,AT5G63590,AT5G63595
GO:BP	cellular response to endogenous stimulus	GO:0071495	false	0.000160493	3.79454	1107	2100	152	23046	AT1G02340,AT1G03840,AT1G04250,AT1G04550,AT1G05850,AT1G10480,AT1G10560,AT1G12110,AT1G12820,AT1G15100,AT1G15550,AT1G16060,AT1G18100,AT1G19350,AT1G19850,AT1G20930,AT1G23140,AT1G24020,AT1G30690,AT1G31770,AT1G31880,AT1G51140,AT1G52400,AT1G53130,AT1G54200,AT1G59940,AT1G62660,AT1G63650,AT1G64625,AT1G66350,AT1G67710,AT1G68360,AT1G68840,AT1G69160,AT1G70700,AT1G70800,AT1G70940,AT1G71830,AT1G71930,AT1G71960…
GO:BP	lateral root morphogenesis	GO:0010102	false	0.000177577	3.75061	71	2100	22	23046	AT1G07880,AT1G15570,AT1G49430,AT1G77690,AT2G22670,AT2G30340,AT2G38120,AT2G45420,AT3G20860,AT3G22400,AT3G24300,AT3G30260,AT3G58190,AT3G59420,AT4G14550,AT4G16780,AT4G37070,AT5G18560,AT5G56320,AT5G57390,AT5G57740,AT5G66815
GO:BP	developmental growth involved in morphogenesis	GO:0060560	false	0.000186335	3.72971	354	2100	63	23046	AT1G04160,AT1G10480,AT1G11160,AT1G12040,AT1G12560,AT1G12950,AT1G18620,AT1G21270,AT1G24620,AT1G27380,AT1G63450,AT1G70940,AT1G75500,AT1G77110,AT1G79620,AT1G79860,AT2G19690,AT2G19760,AT2G26420,AT2G28620,AT2G35650,AT2G36880,AT2G41970,AT2G43750,AT2G45890,AT3G02170,AT3G07880,AT3G18000,AT3G19820,AT3G23090,AT3G26610,AT3G29030,AT3G43960,AT3G50660,AT3G53750,AT3G54180,AT3G63430,AT4G02270,AT4G16780,AT4G24580…
GO:BP	response to auxin	GO:0009733	false	0.000191871	3.71699	457	2100	76	23046	AT1G04250,AT1G04550,AT1G12110,AT1G12820,AT1G19840,AT1G19850,AT1G27740,AT1G28130,AT1G30690,AT1G31880,AT1G54200,AT1G54990,AT1G64625,AT1G69160,AT1G70940,AT1G71930,AT1G73590,AT1G75500,AT1G75590,AT1G77110,AT1G77690,AT1G78570,AT2G01420,AT2G01950,AT2G14960,AT2G19690,AT2G21050,AT2G22240,AT2G22670,AT2G28350,AT2G33310,AT2G36210,AT2G38120,AT2G43010,AT2G44830,AT2G47260,AT2G47460,AT3G04730,AT3G05630,AT3G13980…
GO:BP	response to extracellular stimulus	GO:0009991	true	0.00020919	3.67946	294	2100	55	23046	AT1G05630,AT1G06830,AT1G09340,AT1G15460,AT1G18420,AT1G22160,AT1G32080,AT1G53310,AT1G66270,AT1G70410,AT1G73010,AT1G78020,AT1G80760,AT2G01830,AT2G11810,AT2G15970,AT2G20610,AT2G22240,AT2G27050,AT2G41220,AT2G47160,AT3G01500,AT3G02570,AT3G05630,AT3G13610,AT3G23430,AT3G25710,AT3G25790,AT3G48350,AT3G52190,AT3G53480,AT3G53900,AT3G62680,AT4G01900,AT4G02270,AT4G04955,AT4G14680,AT4G24670,AT4G29920,AT4G33030…
GO:BP	cellular response to hormone stimulus	GO:0032870	false	0.000211431	3.67483	1076	2100	148	23046	AT1G02340,AT1G03840,AT1G04250,AT1G04550,AT1G05850,AT1G10480,AT1G10560,AT1G12110,AT1G12820,AT1G15100,AT1G15550,AT1G16060,AT1G18100,AT1G19350,AT1G19850,AT1G20930,AT1G23140,AT1G24020,AT1G30690,AT1G31770,AT1G31880,AT1G51140,AT1G52400,AT1G53130,AT1G54200,AT1G59940,AT1G62660,AT1G63650,AT1G64625,AT1G66350,AT1G67710,AT1G68360,AT1G68840,AT1G69160,AT1G70700,AT1G70800,AT1G70940,AT1G71830,AT1G71930,AT1G71960…
GO:BP	cell wall polysaccharide biosynthetic process	GO:0070592	false	0.000222799	3.65209	89	2100	25	23046	AT1G08990,AT1G19300,AT1G33800,AT1G54940,AT1G64440,AT1G67330,AT2G15440,AT2G37090,AT2G38320,AT3G18660,AT3G21190,AT3G50220,AT4G02500,AT4G09990,AT4G33330,AT5G01360,AT5G06610,AT5G15630,AT5G22940,AT5G41040,AT5G54690,AT5G59290,AT5G60950,AT5G62220,AT5G67210
GO:BP	post-embryonic root morphogenesis	GO:0010101	false	0.000233825	3.63111	72	2100	22	23046	AT1G07880,AT1G15570,AT1G49430,AT1G77690,AT2G22670,AT2G30340,AT2G38120,AT2G45420,AT3G20860,AT3G22400,AT3G24300,AT3G30260,AT3G58190,AT3G59420,AT4G14550,AT4G16780,AT4G37070,AT5G18560,AT5G56320,AT5G57390,AT5G57740,AT5G66815
GO:BP	phosphorylation	GO:0016310	false	0.000254038	3.5951	1593	2100	204	23046	AT1G03920,AT1G04700,AT1G07560,AT1G07880,AT1G08590,AT1G08650,AT1G09440,AT1G09450,AT1G11130,AT1G11350,AT1G11915,AT1G12000,AT1G12330,AT1G14750,AT1G15570,AT1G16300,AT1G16440,AT1G17750,AT1G18670,AT1G20610,AT1G20930,AT1G21270,AT1G22170,AT1G23540,AT1G26970,AT1G29230,AT1G31230,AT1G44110,AT1G47840,AT1G48480,AT1G49580,AT1G49730,AT1G49820,AT1G51805,AT1G51830,AT1G51840,AT1G52290,AT1G61590,AT1G61860,AT1G61950…
GO:BP	organic cyclic compound biosynthetic process	GO:1901362	false	0.000273877	3.56244	3369	2100	387	23046	AT1G01060,AT1G01380,AT1G02205,AT1G02340,AT1G03630,AT1G03840,AT1G04220,AT1G04250,AT1G04550,AT1G06923,AT1G07370,AT1G07890,AT1G08250,AT1G08320,AT1G09250,AT1G09340,AT1G09540,AT1G10030,AT1G10120,AT1G10480,AT1G10670,AT1G13600,AT1G16060,AT1G16705,AT1G18670,AT1G18870,AT1G19000,AT1G19330,AT1G19350,AT1G19850,AT1G20640,AT1G21150,AT1G22640,AT1G25440,AT1G26570,AT1G27740,AT1G28680,AT1G29280,AT1G30650,AT1G31070…
GO:BP	carbohydrate catabolic process	GO:0016052	false	0.000276346	3.55855	304	2100	56	23046	AT1G02810,AT1G04680,AT1G05310,AT1G09340,AT1G11920,AT1G12000,AT1G16300,AT1G19940,AT1G22170,AT1G22650,AT1G23200,AT1G47840,AT1G48930,AT1G53830,AT1G53840,AT1G64390,AT1G67750,AT1G70710,AT1G75680,AT1G79530,AT2G19150,AT2G21330,AT2G43610,AT3G01260,AT3G07010,AT3G07970,AT3G09540,AT3G10710,AT3G20040,AT3G24670,AT3G26610,AT3G27400,AT3G47010,AT3G47050,AT3G47400,AT3G49220,AT3G52930,AT3G53190,AT3G54320,AT3G54420…
GO:BP	response to nutrient levels	GO:0031667	false	0.000414298	3.38269	255	2100	49	23046	AT1G05630,AT1G06830,AT1G15460,AT1G18420,AT1G22160,AT1G53310,AT1G66270,AT1G70410,AT1G73010,AT1G78020,AT1G80760,AT2G01830,AT2G11810,AT2G22240,AT2G27050,AT2G41220,AT2G47160,AT3G01500,AT3G02570,AT3G05630,AT3G13610,AT3G23430,AT3G25710,AT3G25790,AT3G48350,AT3G52190,AT3G53480,AT3G53900,AT3G62680,AT4G01900,AT4G02270,AT4G04955,AT4G14680,AT4G24670,AT4G33030,AT5G01220,AT5G03545,AT5G03570,AT5G05390,AT5G14740…
GO:BP	chemical homeostasis	GO:0048878	true	0.000439287	3.35725	434	2100	72	23046	AT1G01580,AT1G05630,AT1G14120,AT1G15460,AT1G16300,AT1G20340,AT1G20450,AT1G21140,AT1G21270,AT1G28130,AT1G30560,AT1G32450,AT1G44800,AT1G47840,AT1G52400,AT1G60960,AT1G62280,AT1G64780,AT1G66970,AT1G68570,AT1G68650,AT1G69690,AT1G70940,AT1G71050,AT1G73590,AT1G76800,AT1G77110,AT1G79530,AT2G01420,AT2G01830,AT2G05070,AT2G05100,AT2G14520,AT2G18790,AT2G40300,AT2G47160,AT3G02040,AT3G17790,AT3G20040,AT3G24300…
GO:BP	sulfur compound metabolic process	GO:0006790	false	0.000482883	3.31616	395	2100	67	23046	AT1G10360,AT1G10670,AT1G13420,AT1G16400,AT1G16410,AT1G17190,AT1G18590,AT1G24100,AT1G27130,AT1G27140,AT1G28170,AT1G31230,AT1G49820,AT1G52400,AT1G53680,AT1G60810,AT1G62560,AT1G66270,AT1G68360,AT1G74090,AT1G78370,AT2G14750,AT2G17265,AT2G20610,AT2G22330,AT2G29440,AT2G36880,AT2G38700,AT2G43100,AT2G43750,AT3G03780,AT3G06650,AT3G16400,AT3G19710,AT3G20860,AT3G22740,AT3G22890,AT3G23810,AT3G44540,AT3G44550…
GO:BP	suberin biosynthetic process	GO:0010345	false	0.000521306	3.28291	21	2100	11	23046	AT1G04220,AT1G64670,AT3G11430,AT3G44540,AT3G44550,AT3G53510,AT5G10280,AT5G13580,AT5G23190,AT5G41040,AT5G58860
GO:BP	polysaccharide biosynthetic process	GO:0000271	false	0.000536504	3.27043	235	2100	46	23046	AT1G02730,AT1G05850,AT1G06490,AT1G08990,AT1G10670,AT1G13250,AT1G16860,AT1G19300,AT1G32900,AT1G33800,AT1G54940,AT1G63450,AT1G64440,AT1G67330,AT2G15440,AT2G28315,AT2G33570,AT2G37090,AT2G38320,AT2G39770,AT3G14570,AT3G18660,AT3G21190,AT3G50220,AT3G62660,AT4G02500,AT4G09990,AT4G18780,AT4G20460,AT4G33330,AT5G01360,AT5G06610,AT5G09870,AT5G15630,AT5G15740,AT5G17420,AT5G22940,AT5G41040,AT5G44030,AT5G48300…
GO:BP	reactive oxygen species metabolic process	GO:0072593	false	0.000541985	3.26601	199	2100	41	23046	AT1G05250,AT1G05260,AT1G07890,AT1G30870,AT1G32540,AT1G44970,AT1G66350,AT1G68850,AT1G71695,AT1G77490,AT2G01570,AT2G05070,AT2G05100,AT2G12646,AT2G18150,AT2G18980,AT2G32010,AT2G38380,AT2G38390,AT2G41480,AT3G01190,AT3G03450,AT3G21770,AT3G27690,AT3G32980,AT3G49960,AT4G16270,AT4G21960,AT4G25100,AT4G26010,AT4G36430,AT5G14130,AT5G16710,AT5G17820,AT5G22410,AT5G24070,AT5G42180,AT5G51890,AT5G64100,AT5G66390…
GO:BP	hormone-mediated signaling pathway	GO:0009755	false	0.000573359	3.24157	1013	2100	139	23046	AT1G02340,AT1G03840,AT1G04250,AT1G04550,AT1G05850,AT1G10480,AT1G10560,AT1G12110,AT1G12820,AT1G15100,AT1G15550,AT1G16060,AT1G18100,AT1G19350,AT1G19850,AT1G20930,AT1G23140,AT1G24020,AT1G31770,AT1G31880,AT1G52400,AT1G53130,AT1G54200,AT1G59940,AT1G62660,AT1G63650,AT1G66350,AT1G67710,AT1G68360,AT1G68840,AT1G69160,AT1G70700,AT1G70800,AT1G70940,AT1G71830,AT1G71960,AT1G72450,AT1G73580,AT1G73590,AT1G74500…
GO:BP	cell morphogenesis	GO:0000902	false	0.000829883	3.08098	425	2100	70	23046	AT1G06490,AT1G10480,AT1G11130,AT1G11160,AT1G12040,AT1G18620,AT1G21270,AT1G27380,AT1G27740,AT1G56580,AT1G66470,AT1G68360,AT1G70940,AT1G71790,AT1G73360,AT1G75500,AT1G79620,AT1G79860,AT2G19690,AT2G19760,AT2G26420,AT2G28620,AT2G35650,AT2G36880,AT2G41970,AT2G43750,AT3G02170,AT3G07880,AT3G14570,AT3G18000,AT3G19820,AT3G23090,AT3G26610,AT3G29030,AT3G50660,AT3G54180,AT3G55360,AT3G63430,AT4G02270,AT4G14750…
GO:BP	fatty acid biosynthetic process	GO:0006633	false	0.000982617	3.00762	168	2100	36	23046	AT1G01120,AT1G04220,AT1G06080,AT1G10670,AT1G16060,AT1G25450,AT1G53130,AT1G67730,AT2G06050,AT2G29980,AT2G32720,AT2G34770,AT2G38010,AT3G01420,AT3G05020,AT3G06460,AT3G06650,AT3G22400,AT3G25110,AT3G55360,AT4G01900,AT4G13840,AT4G34250,AT5G02890,AT5G10280,AT5G10480,AT5G15530,AT5G16230,AT5G16390,AT5G23190,AT5G38020,AT5G42650,AT5G43760,AT5G47630,AT5G48880,AT5G49460
GO:BP	establishment of localization	GO:0051234	false	0.00103223	2.98622	2726	2100	318	23046	AT1G01580,AT1G01620,AT1G02335,AT1G04160,AT1G04520,AT1G04760,AT1G06490,AT1G07410,AT1G08430,AT1G08670,AT1G09560,AT1G10030,AT1G10385,AT1G10630,AT1G10800,AT1G11670,AT1G12110,AT1G12430,AT1G12500,AT1G12950,AT1G14730,AT1G15210,AT1G15460,AT1G16230,AT1G16390,AT1G16920,AT1G17140,AT1G17700,AT1G18420,AT1G18880,AT1G19970,AT1G20823,AT1G20860,AT1G21070,AT1G21140,AT1G22710,AT1G25480,AT1G25530,AT1G27950,AT1G30280…
GO:BP	cellular lipid metabolic process	GO:0044255	false	0.00120028	2.92072	821	2100	116	23046	AT1G01120,AT1G01610,AT1G04220,AT1G05630,AT1G06080,AT1G10040,AT1G10670,AT1G15550,AT1G16060,AT1G25450,AT1G31950,AT1G33700,AT1G33750,AT1G48600,AT1G48800,AT1G48820,AT1G49430,AT1G52340,AT1G52400,AT1G53130,AT1G53520,AT1G62190,AT1G64670,AT1G66020,AT1G67730,AT1G73600,AT1G77590,AT1G78950,AT1G78970,AT2G06050,AT2G11810,AT2G18790,AT2G19690,AT2G22240,AT2G26420,AT2G29980,AT2G32010,AT2G32720,AT2G34770,AT2G38010…
GO:BP	homeostatic process	GO:0042592	false	0.00123425	2.9086	487	2100	77	23046	AT1G01580,AT1G05630,AT1G14120,AT1G15460,AT1G16300,AT1G20340,AT1G20450,AT1G21140,AT1G21270,AT1G28130,AT1G30560,AT1G32450,AT1G44800,AT1G47840,AT1G52400,AT1G60960,AT1G62280,AT1G64780,AT1G66970,AT1G67740,AT1G68570,AT1G68650,AT1G69690,AT1G70940,AT1G71050,AT1G73590,AT1G76800,AT1G77110,AT1G79530,AT2G01420,AT2G01830,AT2G05070,AT2G05100,AT2G14520,AT2G18790,AT2G23950,AT2G40300,AT2G47160,AT3G02040,AT3G02730…
GO:BP	carboxylic acid transmembrane transport	GO:1905039	false	0.00124722	2.90406	103	2100	26	23046	AT1G08430,AT1G18420,AT1G25480,AT1G25530,AT1G32080,AT1G44800,AT1G48640,AT1G77690,AT2G21050,AT2G24762,AT2G34390,AT2G38120,AT2G39510,AT2G41190,AT3G01760,AT4G25010,AT4G25760,AT4G31730,AT5G01240,AT5G01340,AT5G09220,AT5G38820,AT5G49630,AT5G50800,AT5G57685,AT5G63850
GO:BP	post-embryonic root development	GO:0048528	false	0.00129472	2.88782	156	2100	34	23046	AT1G07880,AT1G12110,AT1G12820,AT1G15570,AT1G31880,AT1G32080,AT1G49430,AT1G64670,AT1G77110,AT1G77690,AT2G19760,AT2G22670,AT2G30340,AT2G38120,AT2G45420,AT3G18000,AT3G20860,AT3G22400,AT3G24300,AT3G28860,AT3G30260,AT3G50060,AT3G58190,AT3G59420,AT4G14550,AT4G16780,AT4G24670,AT4G26760,AT4G37070,AT5G18560,AT5G56320,AT5G57390,AT5G57740,AT5G66815
GO:BP	export across plasma membrane	GO:0140115	false	0.00131183	2.88212	97	2100	25	23046	AT1G11670,AT1G12950,AT1G31770,AT1G31880,AT1G44800,AT1G70940,AT1G71870,AT1G73590,AT1G75500,AT1G77110,AT1G78570,AT2G01420,AT2G24762,AT2G44830,AT3G28860,AT3G53480,AT3G60330,AT4G21910,AT4G22790,AT4G25760,AT4G30190,AT4G31730,AT5G19700,AT5G57685,AT5G62670
GO:BP	lateral root development	GO:0048527	false	0.00143213	2.84402	143	2100	32	23046	AT1G07880,AT1G12110,AT1G12820,AT1G15570,AT1G31880,AT1G32080,AT1G49430,AT1G64670,AT1G77110,AT1G77690,AT2G19760,AT2G22670,AT2G30340,AT2G38120,AT2G45420,AT3G20860,AT3G22400,AT3G24300,AT3G28860,AT3G30260,AT3G50060,AT3G58190,AT3G59420,AT4G14550,AT4G16780,AT4G24670,AT4G37070,AT5G18560,AT5G56320,AT5G57390,AT5G57740,AT5G66815
GO:BP	response to low light intensity stimulus	GO:0009645	true	0.0016516	2.7821	19	2100	10	23046	AT1G61520,AT2G05070,AT2G05100,AT2G18790,AT2G27820,AT2G43010,AT3G27690,AT3G47470,AT3G54890,AT3G61470
GO:BP	cellular response to organic substance	GO:0071310	false	0.00179199	2.74666	1263	2100	164	23046	AT1G02340,AT1G03840,AT1G04250,AT1G04550,AT1G05630,AT1G05850,AT1G10480,AT1G10560,AT1G11350,AT1G12110,AT1G12820,AT1G15100,AT1G15550,AT1G16060,AT1G18100,AT1G18670,AT1G19350,AT1G19850,AT1G20930,AT1G23140,AT1G24020,AT1G30690,AT1G31770,AT1G31880,AT1G33890,AT1G51140,AT1G52340,AT1G52400,AT1G53130,AT1G54200,AT1G59940,AT1G62660,AT1G63650,AT1G64625,AT1G66350,AT1G67710,AT1G68360,AT1G68840,AT1G69160,AT1G70700…
GO:BP	lignin biosynthetic process	GO:0009809	false	0.00189986	2.72128	52	2100	17	23046	AT1G07890,AT1G61590,AT2G36880,AT2G38080,AT3G11670,AT3G16340,AT3G19450,AT3G55580,AT4G01070,AT4G26220,AT4G37970,AT4G39330,AT5G03260,AT5G04330,AT5G48930,AT5G60020,AT5G66390
GO:BP	response to lipid	GO:0033993	false	0.00191862	2.71701	999	2100	135	23046	AT1G02340,AT1G03840,AT1G05630,AT1G09310,AT1G10480,AT1G10560,AT1G12420,AT1G15100,AT1G15550,AT1G16060,AT1G17750,AT1G18100,AT1G19350,AT1G20450,AT1G23140,AT1G24020,AT1G24120,AT1G31880,AT1G32080,AT1G51140,AT1G52400,AT1G53130,AT1G56580,AT1G62660,AT1G63650,AT1G64670,AT1G66350,AT1G67710,AT1G68360,AT1G70700,AT1G70800,AT1G71830,AT1G71930,AT1G71960,AT1G72450,AT1G73080,AT1G73580,AT1G74500,AT1G74520,AT1G78700…
GO:BP	xylem development	GO:0010089	false	0.00206959	2.68411	47	2100	16	23046	AT1G09540,AT1G62990,AT1G64625,AT1G71930,AT2G13820,AT2G28250,AT2G45420,AT3G20557,AT3G21710,AT3G24770,AT3G59690,AT4G32880,AT5G06610,AT5G19530,AT5G61480,AT5G64080
GO:BP	regulation of hormone levels	GO:0010817	false	0.00207966	2.68201	292	2100	52	23046	AT1G04180,AT1G04610,AT1G10030,AT1G12110,AT1G14120,AT1G17140,AT1G30690,AT1G31770,AT1G31880,AT1G54200,AT1G54990,AT1G69160,AT1G70560,AT1G70940,AT1G73590,AT1G75500,AT1G77110,AT1G77690,AT1G78100,AT1G78570,AT2G01420,AT2G20610,AT2G22330,AT2G26260,AT2G28305,AT2G33230,AT2G38120,AT2G43010,AT2G44830,AT2G45400,AT2G47260,AT3G13980,AT3G14370,AT3G19820,AT3G28860,AT3G50660,AT3G53480,AT4G09160,AT4G11880,AT4G24670…
GO:BP	cellular polysaccharide biosynthetic process	GO:0033692	false	0.00219862	2.65785	195	2100	39	23046	AT1G02730,AT1G05850,AT1G06490,AT1G08990,AT1G10670,AT1G16860,AT1G19300,AT1G32900,AT1G33800,AT1G54940,AT1G64440,AT1G67330,AT2G15440,AT2G37090,AT2G38320,AT2G39770,AT3G14570,AT3G18660,AT3G21190,AT3G50220,AT4G02500,AT4G09990,AT4G18780,AT4G20460,AT4G33330,AT5G01360,AT5G06610,AT5G09870,AT5G15630,AT5G17420,AT5G22940,AT5G41040,AT5G44030,AT5G48300,AT5G54690,AT5G59290,AT5G60950,AT5G62220,AT5G67210
GO:BP	generation of precursor metabolites and energy	GO:0006091	false	0.00225807	2.64626	503	2100	78	23046	AT1G06680,AT1G08380,AT1G12000,AT1G15820,AT1G16300,AT1G20340,AT1G22170,AT1G29910,AT1G29930,AT1G30850,AT1G47840,AT1G53310,AT1G55670,AT1G60950,AT1G61520,AT1G64640,AT1G67740,AT1G76100,AT1G79040,AT1G79530,AT2G01590,AT2G05070,AT2G05100,AT2G21330,AT2G25060,AT2G27035,AT2G27510,AT2G30570,AT2G32300,AT2G34420,AT2G46820,AT3G08940,AT3G09810,AT3G11670,AT3G14940,AT3G15020,AT3G16250,AT3G20040,AT3G20570,AT3G27200…
GO:BP	transport	GO:0006810	false	0.00235422	2.62815	2682	2100	311	23046	AT1G01580,AT1G01620,AT1G02335,AT1G04160,AT1G04520,AT1G04760,AT1G06490,AT1G07410,AT1G08430,AT1G08670,AT1G09560,AT1G10030,AT1G10385,AT1G10630,AT1G10800,AT1G11670,AT1G12110,AT1G12430,AT1G12500,AT1G12950,AT1G14730,AT1G15210,AT1G15460,AT1G16230,AT1G16390,AT1G16920,AT1G17140,AT1G17700,AT1G18420,AT1G18880,AT1G19970,AT1G20823,AT1G20860,AT1G21070,AT1G21140,AT1G22710,AT1G25480,AT1G25530,AT1G27950,AT1G30280…
GO:BP	fatty acid metabolic process	GO:0006631	false	0.00241697	2.61673	278	2100	50	23046	AT1G01120,AT1G04220,AT1G06080,AT1G10670,AT1G16060,AT1G25450,AT1G49430,AT1G53130,AT1G53520,AT1G62190,AT1G67730,AT1G77590,AT2G06050,AT2G11810,AT2G29980,AT2G32720,AT2G34770,AT2G38010,AT2G45970,AT3G01420,AT3G05020,AT3G06460,AT3G06650,AT3G10520,AT3G22400,AT3G25110,AT3G47860,AT3G55360,AT3G63170,AT4G00360,AT4G01900,AT4G13840,AT4G14440,AT4G31910,AT4G34250,AT5G02890,AT5G10280,AT5G10480,AT5G15530,AT5G16230…
GO:BP	regulation of molecular function	GO:0065009	true	0.00277134	2.55731	668	2100	97	23046	AT1G01060,AT1G02810,AT1G05640,AT1G07370,AT1G07500,AT1G08340,AT1G10630,AT1G14750,AT1G15570,AT1G20610,AT1G23140,AT1G23200,AT1G24020,AT1G44110,AT1G44900,AT1G47960,AT1G48870,AT1G53830,AT1G53840,AT1G62280,AT1G62770,AT1G70210,AT1G70800,AT1G73580,AT1G76310,AT1G76760,AT1G79860,AT1G80370,AT2G17620,AT2G25240,AT2G26260,AT2G26390,AT2G26760,AT2G34470,AT2G35210,AT2G37380,AT2G39280,AT2G39370,AT2G39730,AT2G41180…
GO:BP	response to iron ion	GO:0010039	false	0.00284894	2.54532	24	2100	11	23046	AT1G21140,AT1G76800,AT2G28160,AT2G40300,AT3G12900,AT3G25190,AT3G56090,AT4G24120,AT4G31940,AT5G01600,AT5G24380
GO:BP	vascular transport	GO:0010232	false	0.00303258	2.51819	20	2100	10	23046	AT1G06490,AT1G18880,AT2G01950,AT3G09070,AT3G47960,AT4G29920,AT5G04950,AT5G09220,AT5G56080,AT5G65020
GO:BP	circulatory system process	GO:0003013	false	0.00303258	2.51819	20	2100	10	23046	AT1G06490,AT1G18880,AT2G01950,AT3G09070,AT3G47960,AT4G29920,AT5G04950,AT5G09220,AT5G56080,AT5G65020
GO:BP	system process	GO:0003008	false	0.00303258	2.51819	20	2100	10	23046	AT1G06490,AT1G18880,AT2G01950,AT3G09070,AT3G47960,AT4G29920,AT5G04950,AT5G09220,AT5G56080,AT5G65020
GO:BP	phloem transport	GO:0010233	false	0.00303258	2.51819	20	2100	10	23046	AT1G06490,AT1G18880,AT2G01950,AT3G09070,AT3G47960,AT4G29920,AT5G04950,AT5G09220,AT5G56080,AT5G65020
GO:BP	vascular process in circulatory system	GO:0003018	false	0.00303258	2.51819	20	2100	10	23046	AT1G06490,AT1G18880,AT2G01950,AT3G09070,AT3G47960,AT4G29920,AT5G04950,AT5G09220,AT5G56080,AT5G65020
GO:BP	mitotic cell cycle process	GO:1903047	true	0.00304515	2.51639	227	2100	43	23046	AT1G02730,AT1G07500,AT1G14750,AT1G15570,AT1G20610,AT1G20930,AT1G44110,AT1G44900,AT1G50490,AT1G70210,AT1G76310,AT1G76540,AT1G80370,AT2G17620,AT2G26760,AT2G28620,AT2G32590,AT2G36200,AT3G05480,AT3G11520,AT3G19050,AT3G25980,AT3G44050,AT3G54180,AT3G57060,AT3G57860,AT3G58650,AT4G09550,AT4G18780,AT4G22860,AT4G32830,AT4G34160,AT5G02420,AT5G04470,AT5G06150,AT5G09870,AT5G15510,AT5G17420,AT5G44030,AT5G47820…
GO:BP	cellular component organization	GO:0016043	false	0.0030789	2.5116	3028	2100	345	23046	AT1G01750,AT1G02730,AT1G02810,AT1G02900,AT1G04030,AT1G04050,AT1G04160,AT1G04820,AT1G05250,AT1G05310,AT1G06490,AT1G06760,AT1G07500,AT1G07790,AT1G08990,AT1G09340,AT1G10670,AT1G11160,AT1G11545,AT1G12040,AT1G12560,AT1G13250,AT1G14750,AT1G16230,AT1G17710,AT1G18620,AT1G19300,AT1G19940,AT1G20190,AT1G20450,AT1G21150,AT1G21270,AT1G23200,AT1G23720,AT1G24100,AT1G24764,AT1G30280,AT1G30850,AT1G31760,AT1G32080…
GO:BP	flavonoid biosynthetic process	GO:0009813	true	0.00341839	2.46618	77	2100	21	23046	AT1G06000,AT1G30530,AT1G69690,AT1G70000,AT1G78570,AT2G28350,AT2G47460,AT3G21560,AT3G25710,AT3G55120,AT4G01900,AT4G27430,AT5G05270,AT5G07990,AT5G08640,AT5G13930,AT5G41315,AT5G42800,AT5G48930,AT5G63590,AT5G63595
GO:BP	flavonoid metabolic process	GO:0009812	false	0.00379246	2.42108	96	2100	24	23046	AT1G06000,AT1G30530,AT1G69690,AT1G70000,AT1G78570,AT2G28350,AT2G47460,AT3G21560,AT3G25710,AT3G45070,AT3G55120,AT4G01900,AT4G27430,AT4G27560,AT4G31920,AT5G05270,AT5G07990,AT5G08640,AT5G13930,AT5G41315,AT5G42800,AT5G48930,AT5G63590,AT5G63595
GO:BP	localization	GO:0051179	false	0.00467206	2.33049	2962	2100	337	23046	AT1G01580,AT1G01620,AT1G02335,AT1G03840,AT1G04160,AT1G04520,AT1G04760,AT1G06490,AT1G07410,AT1G08430,AT1G08670,AT1G09560,AT1G10030,AT1G10385,AT1G10630,AT1G10800,AT1G11670,AT1G12110,AT1G12430,AT1G12500,AT1G12950,AT1G14730,AT1G15210,AT1G15460,AT1G16230,AT1G16390,AT1G16920,AT1G17140,AT1G17700,AT1G18420,AT1G18880,AT1G19970,AT1G20823,AT1G20860,AT1G21070,AT1G21140,AT1G21810,AT1G22290,AT1G22710,AT1G24100…
GO:BP	aromatic compound biosynthetic process	GO:0019438	false	0.00676019	2.17004	3225	2100	362	23046	AT1G01060,AT1G01380,AT1G02340,AT1G03630,AT1G03840,AT1G04220,AT1G04250,AT1G04550,AT1G06923,AT1G07370,AT1G07890,AT1G08250,AT1G08320,AT1G09250,AT1G09340,AT1G09540,AT1G10120,AT1G10480,AT1G10670,AT1G13600,AT1G16060,AT1G16705,AT1G18670,AT1G18870,AT1G19000,AT1G19330,AT1G19350,AT1G19850,AT1G20640,AT1G21150,AT1G22640,AT1G25440,AT1G26570,AT1G27740,AT1G28680,AT1G29280,AT1G30650,AT1G31070,AT1G32100,AT1G46480…
GO:BP	anatomical structure formation involved in morphogenesis	GO:0048646	false	0.00775202	2.11059	220	2100	41	23046	AT1G07880,AT1G15570,AT1G18370,AT1G49430,AT1G55580,AT1G65060,AT1G73590,AT1G77690,AT2G03090,AT2G20750,AT2G22670,AT2G28950,AT2G30340,AT2G37640,AT2G38120,AT2G39700,AT2G40610,AT2G45420,AT3G14067,AT3G20860,AT3G22400,AT3G24300,AT3G24770,AT3G28860,AT3G30260,AT3G54180,AT3G55360,AT3G58190,AT3G59420,AT4G16780,AT4G20140,AT4G28250,AT4G35420,AT4G37070,AT5G11110,AT5G56320,AT5G57390,AT5G57620,AT5G57740,AT5G61480…
GO:BP	response to oxidative stress	GO:0006979	true	0.00829107	2.08139	453	2100	70	23046	AT1G05250,AT1G05260,AT1G07890,AT1G09350,AT1G30850,AT1G30870,AT1G31770,AT1G32540,AT1G44970,AT1G51400,AT1G53130,AT1G68850,AT1G71695,AT1G73120,AT1G77490,AT2G06050,AT2G18150,AT2G18980,AT2G21195,AT2G24150,AT2G25625,AT2G37040,AT2G38380,AT2G38390,AT2G39770,AT2G39800,AT2G40300,AT2G40750,AT2G41090,AT2G41480,AT2G47060,AT2G48150,AT3G01190,AT3G01420,AT3G05790,AT3G08670,AT3G13610,AT3G17790,AT3G21770,AT3G32980…
GO:BP	cellular response to auxin stimulus	GO:0071365	false	0.00898484	2.04649	283	2100	49	23046	AT1G04250,AT1G04550,AT1G12110,AT1G12820,AT1G19850,AT1G30690,AT1G31880,AT1G54200,AT1G64625,AT1G69160,AT1G70940,AT1G71930,AT1G73590,AT1G75500,AT1G77110,AT1G77690,AT1G78570,AT2G01420,AT2G01950,AT2G21050,AT2G22670,AT2G28350,AT2G33310,AT2G38120,AT2G43010,AT2G44830,AT3G04730,AT3G13980,AT3G14370,AT3G17600,AT3G21860,AT3G22810,AT3G28860,AT3G50060,AT3G53480,AT3G62100,AT3G62680,AT4G09160,AT4G14550,AT4G14740…
GO:BP	transition metal ion transport	GO:0000041	true	0.010464	1.9803	108	2100	25	23046	AT1G01580,AT1G21140,AT1G60960,AT1G68650,AT1G76800,AT2G28160,AT2G29410,AT2G32270,AT2G40300,AT3G25190,AT3G46900,AT3G56090,AT3G56240,AT3G58060,AT3G58810,AT4G19680,AT4G19690,AT4G24120,AT4G30110,AT4G30120,AT4G33020,AT5G01600,AT5G03570,AT5G24380,AT5G59520
GO:BP	response to cold	GO:0009409	true	0.0136251	1.86566	401	2100	63	23046	AT1G01060,AT1G01120,AT1G05260,AT1G09340,AT1G09350,AT1G16390,AT1G17190,AT1G20450,AT1G20823,AT1G25450,AT1G29390,AT1G42970,AT1G52690,AT1G61520,AT1G66270,AT1G67090,AT1G71960,AT1G74520,AT1G77490,AT2G01570,AT2G05070,AT2G05100,AT2G15970,AT2G17840,AT2G18790,AT2G27710,AT2G38750,AT2G38760,AT2G39730,AT2G40970,AT2G42540,AT2G46830,AT3G01500,AT3G02870,AT3G05890,AT3G11410,AT3G23000,AT3G27690,AT3G47470,AT3G54890…
GO:BP	auxin export across the plasma membrane	GO:0010315	false	0.0145375	1.83751	23	2100	10	23046	AT1G31880,AT1G70940,AT1G73590,AT1G75500,AT1G77110,AT1G78570,AT2G01420,AT2G44830,AT3G28860,AT3G53480
GO:BP	cellular response to phosphate starvation	GO:0016036	true	0.0159056	1.79845	78	2100	20	23046	AT1G18420,AT1G53310,AT1G66270,AT1G73010,AT2G01830,AT2G11810,AT2G22240,AT3G05630,AT3G23430,AT3G25710,AT3G25790,AT3G52190,AT3G53900,AT4G02270,AT4G33030,AT5G01220,AT5G03545,AT5G20150,AT5G20410,AT5G43350
GO:BP	pigment metabolic process	GO:0042440	false	0.0165269	1.78181	189	2100	36	23046	AT1G03630,AT1G06000,AT1G10670,AT1G30530,AT1G58290,AT1G69690,AT1G70000,AT1G74470,AT1G78570,AT2G28350,AT2G35260,AT2G47460,AT3G14530,AT3G20160,AT3G21560,AT3G25710,AT3G32040,AT3G56940,AT3G59400,AT4G01900,AT4G15560,AT4G27430,AT4G27440,AT4G27560,AT4G31920,AT5G08640,AT5G13630,AT5G13930,AT5G17230,AT5G41315,AT5G42800,AT5G52570,AT5G56860,AT5G57030,AT5G63590,AT5G63595
GO:BP	response to metal ion	GO:0010038	false	0.0181777	1.74046	220	2100	40	23046	AT1G08430,AT1G20340,AT1G21140,AT1G71050,AT1G71200,AT1G76800,AT2G17890,AT2G28160,AT2G30860,AT2G38380,AT2G40300,AT2G40370,AT3G02570,AT3G07720,AT3G12900,AT3G22890,AT3G25190,AT3G43810,AT3G51380,AT3G56090,AT3G56240,AT3G58810,AT3G59690,AT3G59780,AT4G24120,AT4G25100,AT4G30120,AT4G30960,AT4G31940,AT4G33010,AT4G33020,AT5G01600,AT5G17920,AT5G22890,AT5G23060,AT5G24380,AT5G24770,AT5G44610,AT5G56080,AT5G65140
GO:BP	cellular response to stimulus	GO:0051716	false	0.0182537	1.73865	3362	2100	372	23046	AT1G01120,AT1G02340,AT1G02900,AT1G03840,AT1G03920,AT1G04020,AT1G04250,AT1G04550,AT1G04700,AT1G05250,AT1G05260,AT1G05630,AT1G05850,AT1G06830,AT1G07370,AT1G07500,AT1G07880,AT1G07890,AT1G08320,AT1G08340,AT1G08650,AT1G09090,AT1G09340,AT1G09450,AT1G10480,AT1G10560,AT1G11350,AT1G12110,AT1G12820,AT1G13635,AT1G14280,AT1G14750,AT1G15100,AT1G15460,AT1G15550,AT1G15970,AT1G16060,AT1G16390,AT1G18100,AT1G18420…
GO:BP	mitotic cell cycle	GO:0000278	false	0.019362	1.71305	291	2100	49	23046	AT1G02730,AT1G04820,AT1G07500,AT1G09450,AT1G14750,AT1G15570,AT1G20610,AT1G20930,AT1G44110,AT1G44900,AT1G50010,AT1G50490,AT1G70210,AT1G76310,AT1G76540,AT1G80370,AT2G17620,AT2G26760,AT2G28620,AT2G32590,AT2G36200,AT3G05480,AT3G11520,AT3G14190,AT3G19050,AT3G25980,AT3G44050,AT3G54180,AT3G57060,AT3G57860,AT3G58650,AT4G09550,AT4G18780,AT4G22860,AT4G32830,AT4G34160,AT5G02420,AT5G04470,AT5G06150,AT5G09870…
GO:BP	photosynthetic electron transport chain	GO:0009767	false	0.0202707	1.69313	55	2100	16	23046	AT1G08380,AT1G55670,AT1G60950,AT1G67740,AT2G01590,AT2G46820,AT3G16250,AT3G50820,AT4G03280,AT4G04020,AT4G05180,AT4G09650,AT4G21280,AT4G23890,AT5G59400,AT5G66570
GO:BP	regulation of cyclin-dependent protein kinase activity	GO:1904029	false	0.0210152	1.67747	61	2100	17	23046	AT1G14750,AT1G15570,AT1G20610,AT1G44110,AT1G70210,AT1G76310,AT1G80370,AT2G17620,AT2G26760,AT2G44740,AT3G11520,AT3G50630,AT3G63120,AT4G34160,AT5G04470,AT5G06150,AT5G07450
GO:BP	regulation of cyclin-dependent protein serine/threonine kinase activity	GO:0000079	true	0.0210152	1.67747	61	2100	17	23046	AT1G14750,AT1G15570,AT1G20610,AT1G44110,AT1G70210,AT1G76310,AT1G80370,AT2G17620,AT2G26760,AT2G44740,AT3G11520,AT3G50630,AT3G63120,AT4G34160,AT5G04470,AT5G06150,AT5G07450
GO:BP	export from cell	GO:0140352	false	0.0263633	1.579	178	2100	34	23046	AT1G10385,AT1G11670,AT1G12950,AT1G31770,AT1G31880,AT1G44800,AT1G70940,AT1G71870,AT1G71960,AT1G73590,AT1G75500,AT1G77110,AT1G78570,AT2G01420,AT2G24762,AT2G44830,AT3G28860,AT3G52190,AT3G53480,AT3G55150,AT3G60330,AT4G03330,AT4G21910,AT4G22790,AT4G25760,AT4G30190,AT4G31730,AT4G35560,AT5G13150,AT5G13990,AT5G16490,AT5G19700,AT5G57685,AT5G62670
GO:BP	response to high light intensity	GO:0009644	true	0.0265151	1.57651	62	2100	17	23046	AT1G61520,AT1G67740,AT2G05070,AT2G05100,AT2G17840,AT2G42540,AT2G47450,AT3G27690,AT3G47470,AT3G47860,AT3G50820,AT3G54890,AT3G61470,AT4G04020,AT5G02120,AT5G54270,AT5G66570
GO:BP	syncytium formation	GO:0006949	false	0.0270888	1.56721	12	2100	7	23046	AT2G03090,AT2G20750,AT2G28950,AT2G37640,AT2G39700,AT2G40610,AT4G28250
GO:BP	regulation of auxin mediated signaling pathway	GO:0010928	false	0.0316855	1.49914	51	2100	15	23046	AT1G31880,AT1G54200,AT1G69160,AT1G70940,AT1G73590,AT1G75500,AT1G77110,AT1G78570,AT2G01420,AT2G43010,AT2G44830,AT3G13980,AT3G28860,AT3G50060,AT3G53480
GO:BP	unidimensional cell growth	GO:0009826	false	0.0362325	1.4409	306	2100	50	23046	AT1G11160,AT1G12040,AT1G18620,AT1G21270,AT1G27380,AT1G75500,AT1G79620,AT1G79860,AT2G19690,AT2G19760,AT2G26420,AT2G28620,AT2G35650,AT2G36880,AT2G41970,AT2G43750,AT3G02170,AT3G07880,AT3G18000,AT3G19820,AT3G23090,AT3G26610,AT3G29030,AT3G50660,AT3G54180,AT3G63430,AT4G02270,AT4G16780,AT4G24580,AT4G34490,AT4G38430,AT5G01840,AT5G04950,AT5G05500,AT5G13150,AT5G13990,AT5G16490,AT5G23530,AT5G26720,AT5G28490…
GO:BP	auxin polar transport	GO:0009926	false	0.0363336	1.43969	102	2100	23	23046	AT1G10030,AT1G12110,AT1G17140,AT1G30690,AT1G54990,AT1G70560,AT1G70940,AT1G73590,AT1G77110,AT1G77690,AT1G78100,AT2G01420,AT2G38120,AT2G47260,AT3G14370,AT3G28860,AT3G53480,AT4G09160,AT4G11880,AT4G30960,AT4G38430,AT5G13930,AT5G19530
GO:BP	coumarin metabolic process	GO:0009804	false	0.0374733	1.42628	9	2100	6	23046	AT1G28680,AT1G66270,AT3G12900,AT3G13610,AT3G53480,AT4G31940
GO:BP	organic hydroxy compound biosynthetic process	GO:1901617	true	0.0396329	1.40194	243	2100	42	23046	AT1G02205,AT1G06000,AT1G10030,AT1G18870,AT1G30530,AT1G52340,AT1G53130,AT1G64670,AT1G64970,AT1G74470,AT1G78570,AT2G22240,AT2G24300,AT2G26260,AT2G28850,AT2G28860,AT2G37700,AT2G38010,AT2G38700,AT2G45400,AT2G47460,AT3G01420,AT3G02590,AT3G02870,AT3G14440,AT3G19820,AT3G50660,AT4G15560,AT4G17190,AT4G23690,AT4G31910,AT4G34650,AT5G08640,AT5G10170,AT5G15070,AT5G24140,AT5G47770,AT5G58784,AT5G63560,AT5G63590…
GO:BP	inorganic anion transport	GO:0015698	false	0.0419782	1.37698	145	2100	29	23046	AT1G12110,AT1G15460,AT1G18880,AT1G20823,AT1G20860,AT1G25480,AT1G32450,AT1G62280,AT1G64650,AT1G67940,AT1G72140,AT1G76430,AT1G80050,AT1G80760,AT2G01830,AT2G38940,AT2G47160,AT3G23430,AT3G45680,AT3G51895,AT3G52190,AT3G62270,AT4G19030,AT5G03545,AT5G10180,AT5G14570,AT5G43350,AT5G60770,AT5G66815
GO:BP	cellular component organization or biogenesis	GO:0071840	false	0.0454887	1.3421	3438	2100	376	23046	AT1G01750,AT1G02730,AT1G02810,AT1G02900,AT1G03870,AT1G04030,AT1G04050,AT1G04160,AT1G04820,AT1G05250,AT1G05310,AT1G06490,AT1G06760,AT1G07070,AT1G07410,AT1G07500,AT1G07790,AT1G08990,AT1G09340,AT1G10670,AT1G11160,AT1G11545,AT1G12040,AT1G12560,AT1G13250,AT1G14750,AT1G16230,AT1G17710,AT1G18620,AT1G19300,AT1G19940,AT1G20190,AT1G20450,AT1G21150,AT1G21270,AT1G23200,AT1G23720,AT1G24100,AT1G24764,AT1G26880…
GO:BP	biosynthetic process	GO:0009058	false	0.0468824	1.32899	6274	2100	649	23046	AT1G01060,AT1G01120,AT1G01380,AT1G01610,AT1G02205,AT1G02340,AT1G02730,AT1G03630,AT1G03840,AT1G04180,AT1G04220,AT1G04250,AT1G04550,AT1G04610,AT1G05170,AT1G05850,AT1G06000,AT1G06080,AT1G06490,AT1G06923,AT1G07070,AT1G07370,AT1G07890,AT1G08250,AT1G08320,AT1G08470,AT1G08990,AT1G09250,AT1G09340,AT1G09540,AT1G10030,AT1G10120,AT1G10480,AT1G10670,AT1G11730,AT1G12900,AT1G13250,AT1G13600,AT1G15550,AT1G16060…
KEGG	Metabolic pathways	KEGG:01100	false	7.62e-23	22.118	2335	594	389	5083	AT1G01120,AT1G01610,AT1G02310,AT1G02730,AT1G02810,AT1G02950,AT1G03130,AT1G03630,AT1G04180,AT1G04220,AT1G04610,AT1G04680,AT1G05250,AT1G05260,AT1G06550,AT1G06680,AT1G07890,AT1G08250,AT1G08380,AT1G09350,AT1G10360,AT1G10670,AT1G11860,AT1G11920,AT1G12000,AT1G12900,AT1G14700,AT1G15550,AT1G15820,AT1G16300,AT1G17190,AT1G17710,AT1G18870,AT1G20340,AT1G22170,AT1G22440,AT1G24100,AT1G25230,AT1G25450,AT1G26560…
KEGG	Photosynthesis	KEGG:00195	false	2.42488e-15	14.6153	45	594	29	5083	AT1G03130,AT1G06680,AT1G08380,AT1G20340,AT1G30380,AT1G30510,AT1G31330,AT1G44575,AT1G52230,AT1G55670,AT1G60950,AT1G67740,AT1G76100,AT1G79040,AT2G20260,AT2G27510,AT2G30570,AT3G16140,AT3G50820,AT4G02770,AT4G03280,AT4G05180,AT4G09650,AT4G12800,AT4G21280,AT4G28750,AT4G32260,AT5G64040,AT5G66570
KEGG	Phenylpropanoid biosynthesis	KEGG:00940	false	1.39917e-09	8.85413	128	594	43	5083	AT1G05250,AT1G05260,AT1G30870,AT1G44970,AT1G65060,AT1G68850,AT1G71695,AT1G77420,AT2G18150,AT2G18980,AT2G34790,AT2G37040,AT2G38380,AT2G38390,AT2G41480,AT2G47630,AT3G01190,AT3G10340,AT3G19450,AT3G21240,AT3G21560,AT3G21770,AT3G32980,AT3G49960,AT4G16270,AT4G21960,AT4G26010,AT4G26220,AT4G36430,AT4G37970,AT4G39330,AT5G04330,AT5G14130,AT5G17820,AT5G22410,AT5G24070,AT5G42180,AT5G48930,AT5G51890,AT5G64100…
KEGG	Biosynthesis of secondary metabolites	KEGG:01110	false	1.42109e-09	8.84738	1277	594	217	5083	AT1G01120,AT1G01610,AT1G02205,AT1G03630,AT1G04220,AT1G05250,AT1G05260,AT1G08250,AT1G10670,AT1G11860,AT1G12000,AT1G15550,AT1G16300,AT1G16410,AT1G18590,AT1G18870,AT1G22170,AT1G22440,AT1G24100,AT1G25450,AT1G26560,AT1G30870,AT1G31230,AT1G32100,AT1G32900,AT1G44970,AT1G47840,AT1G52340,AT1G52400,AT1G55290,AT1G58290,AT1G60270,AT1G60550,AT1G60810,AT1G62660,AT1G63000,AT1G64970,AT1G65060,AT1G66270,AT1G67090…
KEGG	Photosynthesis - antenna proteins	KEGG:00196	false	3.22106e-08	7.492	22	594	15	5083	AT1G15820,AT1G29910,AT1G29930,AT1G61520,AT2G05070,AT2G05100,AT2G34420,AT3G08940,AT3G27690,AT3G47470,AT3G54890,AT3G61470,AT4G10340,AT5G01530,AT5G54270
KEGG	Glucosinolate biosynthesis	KEGG:00966	false	9.28702e-07	6.03212	26	594	15	5083	AT1G16400,AT1G16410,AT1G18590,AT1G24100,AT1G74090,AT2G20610,AT2G22330,AT2G43100,AT3G19710,AT3G58990,AT4G13430,AT4G13770,AT5G14200,AT5G23010,AT5G23020
KEGG	Biosynthesis of nucleotide sugars	KEGG:01250	false	0.00676934	2.16945	100	594	25	5083	AT1G26570,AT1G31070,AT1G47840,AT1G63000,AT1G64440,AT1G78570,AT2G34850,AT2G35020,AT2G39770,AT2G47650,AT3G02230,AT3G02570,AT3G20040,AT3G23820,AT3G62830,AT4G20460,AT4G23920,AT4G24620,AT4G30440,AT4G33030,AT5G15490,AT5G15650,AT5G39320,AT5G48300,AT5G59290
KEGG	Flavonoid biosynthesis	KEGG:00941	false	0.0131822	1.88001	25	594	10	5083	AT3G55120,AT4G26220,AT5G05270,AT5G07990,AT5G08640,AT5G13930,AT5G42800,AT5G48930,AT5G63590,AT5G63595
KEGG	Pentose and glucuronate interconversions	KEGG:00040	false	0.0243271	1.61391	108	594	25	5083	AT1G02810,AT1G04680,AT1G11920,AT1G26570,AT1G53830,AT1G67750,AT2G37790,AT2G43870,AT2G43880,AT3G07010,AT3G07970,AT3G09540,AT3G24670,AT3G27400,AT3G47400,AT3G53190,AT3G59850,AT4G13710,AT4G22080,AT4G24780,AT5G04970,AT5G14650,AT5G15490,AT5G39320,AT5G55590
KEGG	Amino sugar and nucleotide sugar metabolism	KEGG:00520	false	0.0260151	1.58478	133	594	29	5083	AT1G02730,AT1G26570,AT1G31070,AT1G47840,AT1G56680,AT1G63000,AT1G64440,AT1G78570,AT2G34850,AT2G35020,AT2G39770,AT2G43610,AT2G47650,AT3G02230,AT3G02570,AT3G20040,AT3G23820,AT3G54420,AT3G62830,AT4G20460,AT4G23920,AT4G24620,AT4G30440,AT4G33030,AT5G15490,AT5G15650,AT5G39320,AT5G48300,AT5G59290
KEGG	Nitrogen metabolism	KEGG:00910	false	0.0408943	1.38834	43	594	13	5083	AT1G48470,AT1G66200,AT1G70410,AT2G15620,AT2G41220,AT3G01500,AT3G52720,AT4G37550,AT5G14570,AT5G14740,AT5G16570,AT5G53460,AT5G60770
