# Supplementary material for: Key Pathways and Genes of Arabidopsis thaliana and Arabidopsis halleri Roots under Cadmium Stress Responses: Differences and Similarities
Source: Plants (Basel). 2023 Apr 27;12(9):1793. doi: 10.3390/plants12091793 (PMC10180823; doi:10.3390/plants12091793)
Supplement: Supplementary file 1 [file plants-12-01793-s001.zip › Supplementary file S5.xlsx]

## Sheet: Table S5
Table S5: literature retrieved by ThaleMine for the top3 hub genes of each module of interest
	Species	Module name (and features)	Gene ID	Publications in ThaleMine (first author/title/year of publication/Journal/PMID)	Author	Title	Year	Journal
	A. thaliana	lightblue4 (positively associated to Cd)	AT1G71210	#REF!	Ascencio-Ibáñez JT	Global analysis of Arabidopsis gene expression uncovers a complex array of changes impacting pathogen response and cell cycle during geminivirus infection.	2008	Plant Physiol
					Bach-Pages M	Discovering the RNA-Binding Proteome of Plant Leaves with an Improved RNA Interactome Capture Method.	2020	Biomolecules
					Carrie C	Identification of cleavage sites and substrate proteins for two mitochondrial intermediate peptidases in Arabidopsis thaliana.	2015	J Exp Bot
					Cheng CY	Araport11: a complete reannotation of the Arabidopsis thaliana reference genome.	2017	Plant J
					Lurin C	Genome-wide analysis of Arabidopsis pentatricopeptide repeat proteins reveals their essential role in organelle biogenesis.	2004	Plant Cell
					Seki M	Functional annotation of a full-length Arabidopsis cDNA collection.	2002	Science
					Theologis A	Sequence and analysis of chromosome 1 of the plant Arabidopsis thaliana.	2000	Nature
					Yamada K	Empirical analysis of transcriptional activity in the Arabidopsis genome.	2003	Science
			AT5G63830		Dal Bosco C	Inactivation of the chloroplast ATP synthase gamma subunit results in high non-photochemical fluorescence quenching and altered nuclear gene expression in Arabidopsis thaliana.	2004	J Biol Chem
					Jen CH	The Arabidopsis co-expression tool (ACT): a WWW-based tool and database for microarray-based gene expression analysis.	2006	Plant J
					Tabata S	Sequence and analysis of chromosome 5 of the plant Arabidopsis thaliana.	2000	Nature
			AT4G33540		Ascencio-Ibáñez JT	Global analysis of Arabidopsis gene expression uncovers a complex array of changes impacting pathogen response and cell cycle during geminivirus infection.	2008	Plant Physiol
					Catarecha P	A mutant of the Arabidopsis phosphate transporter PHT1;1 displays enhanced arsenic accumulation.	2007	Plant Cell
					Cheng CY	Araport11: a complete reannotation of the Arabidopsis thaliana reference genome.	2017	Plant J
					Dal Bosco C	Inactivation of the chloroplast ATP synthase gamma subunit results in high non-photochemical fluorescence quenching and altered nuclear gene expression in Arabidopsis thaliana.	2004	J Biol Chem
					De Paepe A	Transcriptional profiling by cDNA-AFLP and microarray analysis reveals novel insights into the early response to ethylene in Arabidopsis.	2004	Plant J
					Dutta S	A split-ubiquitin yeast two-hybrid screen to examine the substrate specificity of atToc159 and atToc132, two Arabidopsis chloroplast preprotein import receptors.	2014	PLoS One
					Ma S	Loss of TIP1;1 aquaporin in Arabidopsis leads to cell and plant death.	2004	Plant J
					Mayer K	Sequence and analysis of chromosome 4 of the plant Arabidopsis thaliana.	1999	Nature
					Popescu SC	MAPK target networks in Arabidopsis thaliana revealed using functional protein microarrays.	2009	Genes Dev
		antiquewhite1 (negatively associated to Cd)	AT1G54970		Bergonci T	Arabidopsis thaliana RALF1 opposes brassinosteroid effects on root cell elongation and lateral root formation.	2014	J Exp Bot
					Bruex A	A gene regulatory network for root epidermis cell differentiation in Arabidopsis.	2012	PLoS Genet
					Cheng CY	Araport11: a complete reannotation of the Arabidopsis thaliana reference genome.	2017	Plant J
					Depuydt T	Multi-omics network-based functional annotation of unknown Arabidopsis genes.	2021	Plant J
					Diet A	The Arabidopsis root hair cell wall formation mutant lrx1 is suppressed by mutations in the RHM1 gene encoding a UDP-L-rhamnose synthase.	2006	Plant Cell
					Fowler TJ	Characterization and expression of four proline-rich cell wall protein genes in Arabidopsis encoding two distinct subsets of multiple domain proteins.	1999	Plant Physiol
					Hu W	Characterization of a novel putative zinc finger gene MIF1: involvement in multiple hormonal regulation of Arabidopsis development.	2006	Plant J
					Lou Y	PIP5K9, an Arabidopsis phosphatidylinositol monophosphate kinase, interacts with a cytosolic invertase to negatively regulate sugar-mediated root growth.	2007	Plant Cell
					Theologis A	Sequence and analysis of chromosome 1 of the plant Arabidopsis thaliana.	2000	Nature
					Won SK	Cis-element- and transcriptome-based screening of root hair-specific genes and their functional characterization in Arabidopsis.	2009	Plant Physiol
			AT2G28410		Ascencio-Ibáñez JT	Global analysis of Arabidopsis gene expression uncovers a complex array of changes impacting pathogen response and cell cycle during geminivirus infection.	2008	Plant Physiol
					Borner GH	Identification of glycosylphosphatidylinositol-anchored proteins in Arabidopsis. A proteomic and genomic analysis.	2003	Plant Physiol
					Borner GH	Prediction of glycosylphosphatidylinositol-anchored proteins in Arabidopsis. A genomic analysis.	2002	Plant Physiol
					Depuydt T	Multi-omics network-based functional annotation of unknown Arabidopsis genes.	2021	Plant J
					Leonhardt N	Microarray expression analyses of Arabidopsis guard cells and isolation of a recessive abscisic acid hypersensitive protein phosphatase 2C mutant.	2004	Plant Cell
					Lin X	Sequence and analysis of chromosome 2 of the plant Arabidopsis thaliana.	1999	Nature
					Zapata L	Chromosome-level assembly of Arabidopsis thaliana Ler reveals the extent of translocation and inversion polymorphisms.	2016	Proc Natl Acad Sci U S A
			AT3G07320		Ascencio-Ibáñez JT	Global analysis of Arabidopsis gene expression uncovers a complex array of changes impacting pathogen response and cell cycle during geminivirus infection.	2008	Plant Physiol
					Bayer EM	Arabidopsis cell wall proteome defined using multidimensional protein identification technology.	2006	Proteomics
					Depuydt T	Multi-omics network-based functional annotation of unknown Arabidopsis genes.	2021	Plant J
					Fernandez-Calvino L	Arabidopsis plasmodesmal proteome.	2011	PLoS One
					Ko JH	ANAC012, a member of the plant-specific NAC transcription factor family, negatively regulates xylary fiber development in Arabidopsis thaliana.	2007	Plant J
					Salanoubat M	Sequence and analysis of chromosome 3 of the plant Arabidopsis thaliana.	2000	Nature
					Wang Y	Transcriptome analyses show changes in gene expression to accompany pollen germination and tube growth in Arabidopsis.	2008	Plant Physiol
	A. halleri	brown (positively associated to Cd)	AT3G10500		Ascencio-Ibáñez JT	Global analysis of Arabidopsis gene expression uncovers a complex array of changes impacting pathogen response and cell cycle during geminivirus infection.	2008	Plant Physiol
					Baerson SR	Detoxification and transcriptome response in Arabidopsis seedlings exposed to the allelochemical benzoxazolin-2(3H)-one.	2005	J Biol Chem
					Cheng CY	Araport11: a complete reannotation of the Arabidopsis thaliana reference genome.	2017	Plant J
					Culligan KM	ATR and ATM play both distinct and additive roles in response to ionizing radiation.	2006	Plant J
					Davletova S	The zinc-finger protein Zat12 plays a central role in reactive oxygen and abiotic stress signaling in Arabidopsis.	2005	Plant Physiol
					De Clercq I	The membrane-bound NAC transcription factor ANAC013 functions in mitochondrial retrograde regulation of the oxidative stress response in Arabidopsis.	2013	Plant Cell
					Ding Y	Four distinct types of dehydration stress memory genes in Arabidopsis thaliana.	2013	BMC Plant Biol
					Fleury D	The Arabidopsis thaliana homolog of yeast BRE1 has a function in cell cycle regulation during early leaf and root growth.	2007	Plant Cell
					Gaudinier A	Transcriptional regulation of nitrogen-associated metabolism and growth.	2018	Nature
					Hampton CR	Cesium toxicity in Arabidopsis.	2004	Plant Physiol
					Inzé A	A subcellular localization compendium of hydrogen peroxide-induced proteins.	2012	Plant Cell Environ
					Kim SY	Exploring membrane-associated NAC transcription factors in Arabidopsis: implications for membrane biology in genome regulation.	2007	Nucleic Acids Res
					Lee BH	The Arabidopsis cold-responsive transcriptome and its regulation by ICE1.	2005	Plant Cell
					Lee S	A NAC transcription factor NTL4 promotes reactive oxygen species production during drought-induced leaf senescence in Arabidopsis.	2012	Plant J
					Lee S	Regulation of reactive oxygen species generation under drought conditions in Arabidopsis.	2012	Plant Signal Behav
					Lee S	The Arabidopsis NAC transcription factor NTL4 participates in a positive feedback loop that induces programmed cell death under heat stress conditions.	2014	Plant Sci
					Li B	Promoter-based integration in plant defense regulation.	2014	Plant Physiol
					Lindqvist C	An expressed sequence tag (EST) library from developing fruits of an Hawaiian endemic mint (Stenogyne rugosa, Lamiaceae): characterization and microsatellite markers.	2006	BMC Plant Biol
					Ohashi-Ito K	Class III homeodomain leucine-zipper proteins regulate xylem cell differentiation.	2005	Plant Cell Physiol
					Ooka H	Comprehensive analysis of NAC family genes in Oryza sativa and Arabidopsis thaliana.	2003	DNA Res
					Riechmann JL	Arabidopsis transcription factors: genome-wide comparative analysis among eukaryotes.	2000	Science
					Salanoubat M	Sequence and analysis of chromosome 3 of the plant Arabidopsis thaliana.	2000	Nature
					Shih CF	The NAC-like gene ANTHER INDEHISCENCE FACTOR acts as a repressor that controls anther dehiscence by regulating genes in the jasmonate biosynthesis pathway in Arabidopsis.	2014	J Exp Bot
					Sparks EE	Establishment of Expression in the SHORTROOT-SCARECROW Transcriptional Cascade through Opposing Activities of Both Activators and Repressors.	2016	Dev Cell
					Taylor-Teeples M	An Arabidopsis gene regulatory network for secondary cell wall synthesis.	2015	Nature
					Vergnolle C	The cold-induced early activation of phospholipase C and D pathways determines the response of two distinct clusters of genes in Arabidopsis cell suspensions.	2005	Plant Physiol
					Vermeirssen V	Arabidopsis ensemble reverse-engineered gene regulatory network discloses interconnected transcription factors in oxidative stress.	2014	Plant Cell
					Yamada K	Empirical analysis of transcriptional activity in the Arabidopsis genome.	2003	Science
			AT3G02250		Ascencio-Ibáñez JT	Global analysis of Arabidopsis gene expression uncovers a complex array of changes impacting pathogen response and cell cycle during geminivirus infection.	2008	Plant Physiol
					Cheng CY	Araport11: a complete reannotation of the Arabidopsis thaliana reference genome.	2017	Plant J
					Hansen SF	Plant Glycosyltransferases Beyond CAZy: A Perspective on DUF Families.	2012	Front Plant Sci
					Juenger TE	Natural genetic variation in whole-genome expression in Arabidopsis thaliana: the impact of physiological QTL introgression.	2006	Mol Ecol
					Lao J	The plant glycosyltransferase clone collection for functional genomics.	2014	Plant J
					Neumetzler L	The FRIABLE1 gene product affects cell adhesion in Arabidopsis.	2012	PLoS One
					Nikolovski N	Putative glycosyltransferases and other plant Golgi apparatus proteins are revealed by LOPIT proteomics.	2012	Plant Physiol
					Salanoubat M	Sequence and analysis of chromosome 3 of the plant Arabidopsis thaliana.	2000	Nature
					Takenaka Y	Pectin RG-I rhamnosyltransferases represent a novel plant-specific glycosyltransferase family.	2018	Nat Plants
					Voxeur A	Identification of putative rhamnogalacturonan-II specific glycosyltransferases in Arabidopsis using a combination of bioinformatics approaches.	2012	PLoS One
					Wang Y	Identification of an additional protein involved in mannan biosynthesis.	2013	Plant J
					Yamada K	Empirical analysis of transcriptional activity in the Arabidopsis genome.	2003	Science
			AT3G15550		Hanada K	Functional compensation of primary and secondary metabolites by duplicate genes in Arabidopsis thaliana.	2011	Mol Biol Evol
					Salanoubat M	Sequence and analysis of chromosome 3 of the plant Arabidopsis thaliana.	2000	Nature
					Zapata L	Chromosome-level assembly of Arabidopsis thaliana Ler reveals the extent of translocation and inversion polymorphisms.	2016	Proc Natl Acad Sci U S A
		plum1 (negatively associated to Cd)	XP_003322588		no results
			AT5G49500		Chang IF	Proteomic profiling of tandem affinity purified 14-3-3 protein complexes in Arabidopsis thaliana.	2009	Proteomics
					Cheng CY	Araport11: a complete reannotation of the Arabidopsis thaliana reference genome.	2017	Plant J
					Chu B	Arabidopsis thaliana expresses three divergent Srp54 genes.	1994	Plant Physiol
					Manzano C	Identification of ubiquitinated proteins in Arabidopsis.	2008	Plant Mol Biol
					Sato S	Structural analysis of Arabidopsis thaliana chromosome 5. X. Sequence features of the regions of 3,076,755 bp covered by sixty P1 and TAC clones.	2000	DNA Res
					Tabata S	Sequence and analysis of chromosome 5 of the plant Arabidopsis thaliana.	2000	Nature
			NP_849678		no results
